# Supplementary material for: Genome-Wide Identification and Characterization of Potato Long Non-coding RNAs Associated With Phytophthora infestans Resistance
Source: Front Plant Sci. 2021 Feb 10;12:619062. doi: 10.3389/fpls.2021.619062 (PMC7902931; doi:10.3389/fpls.2021.619062)
Supplement: Supplementary Table 1 — Details of each sample. [file Table_1.XLSX]

## Sheet: Sheet1
SampleID	Description
ht0_1	P. inf treated RB tissue collected at 0hpi replicate 1
ht0_2	P. inf treated RB tissue collected at 0hpi replicate 2
ht0_3	P. inf treated RB tissue collected at 0hpi replicate 3
ht3_1	P. inf treated RB tissue collected at 24hpi replicate 1
ht3_2	P. inf treated RB tissue collected at 24hpi replicate 2
ht3_3	P. inf treated RB tissue collected at 24hpi replicate 3
ht4_1	P. inf treated RB tissue collected at 48hpi replicate 1
ht4_2	P. inf treated RB tissue collected at 48hpi replicate 2
ht4_3	P. inf treated RB tissue collected at 48hpi replicate 3
mht0_1	mock treated RB tissue collected at 0hpi replicate 1
mht0_2	mock treated RB tissue collected at 0hpi replicate 2
mht0_3	mock treated RB tissue collected at 0hpi replicate 3
mht3_1	mock treated RB tissue collected at 24hpi replicate 1
mht3_2	mock treated RB tissue collected at 24hpi replicate 2
mht3_3	mock treated RB tissue collected at 24hpi replicate 3
mht4_1	mock treated RB tissue collected at 48hpi replicate 1
mht4_2	mock treated RB tissue collected at 48hpi replicate 2
mht4_3	mock treated RB tissue collected at 48hpi replicate 3
mrt0_1	mock treated WT tissue collected at 0hpi replicate 1
mrt0_2	mock treated WT tissue collected at 0hpi replicate 2
mrt0_3	mock treated WT tissue collected at 0hpi replicate 3
mrt3_1	mock treated WT tissue collected at 24hpi replicate 1
mrt3_2	mock treated WT tissue collected at 24hpi replicate 2
mrt3_3	mock treated WT tissue collected at 24hpi replicate 3
mrt4_1	mock treated WT tissue collected at 48hpi replicate 1
mrt4_2	mock treated WT tissue collected at 48hpi replicate 2
mrt4_3	mock treated WT tissue collected at 48hpi replicate 3
rt0_1	P. inf treated WT tissue collected at 0hpi replicate 1
rt0_2	P. inf treated WT tissue collected at 0hpi replicate 2
rt0_3	P. inf treated WT tissue collected at 0hpi replicate 3
rt3_1	P. inf treated WT tissue collected at 24hpi replicate 1
rt3_2	P. inf treated WT tissue collected at 24hpi replicate 2
rt3_3	P. inf treated WT tissue collected at 24hpi replicate 3
rt4_1	P. inf treated WT tissue collected at 48hpi replicate 1
rt4_2	P. inf treated WT tissue collected at 48hpi replicate 2
rt4_3	P. inf treated WT tissue collected at 48hpi replicate 3
