# Supplementary material for: Genome-Wide Identification and Characterization of Potato Long Non-coding RNAs Associated With Phytophthora infestans Resistance
Source: Front Plant Sci. 2021 Feb 10;12:619062. doi: 10.3389/fpls.2021.619062 (PMC7902931; doi:10.3389/fpls.2021.619062)
Supplement: Supplementary Table 2 — Statistics of RNA-seq data. [file Table_2.XLSX]

## Sheet: summary
Samples	rawReads	cleanReads	Valid(%)	cleanBase(GB)	GC(%)	Q20(%)	Q30(%)
ht0_1	15507046	13547154	87.36	0.68	43	99.59	98.17
ht0_2	22891756	20181378	88.16	1.01	42.91	99.6	98.21
ht0_3	15550022	13742680	88.38	0.69	43.44	99.57	98.09
ht3_1	15498896	13656068	88.11	0.68	43.28	99.54	98.04
ht3_2	26963106	23908340	88.67	1.2	43.52	99.42	97.93
ht3_3	22649294	19863934	87.7	0.99	43.45	99.53	97.98
ht4_1	16023232	14067954	87.8	0.7	43.42	99.52	97.96
ht4_2	18696330	16496730	88.24	0.82	43.34	99.54	98.02
ht4_3	33649574	29361034	87.26	1.47	42.84	99.39	97.8
mht0_1	18462038	16357594	88.6	0.82	43.17	99.59	98.18
mht0_2	16086216	14193456	88.23	0.71	42.99	99.59	98.2
mht0_3	16340330	14209190	86.96	0.71	43.12	99.59	98.12
mht3_1	15995594	14121604	88.28	0.71	43.27	99.56	98.08
mht3_2	27206626	23784652	87.42	1.19	43.24	99.54	98.06
mht3_3	43291318	37827548	87.38	1.89	43.48	99.37	97.79
mht4_1	16727598	14771306	88.31	0.74	43.22	99.56	98.06
mht4_2	18254178	15905412	87.13	0.8	44	99.53	97.96
mht4_3	26142516	22955050	87.81	1.15	42.95	99.56	98.04
mrt0_1	28580340	25251924	88.35	1.26	43.52	99.48	98.21
mrt0_2	22907202	20388512	89	1.02	43.25	99.44	98.12
mrt0_3	53796744	47425762	88.16	2.37	43.16	99.41	97.97
mrt3_1	46506772	40445446	86.97	2.02	42.3	99.38	97.87
mrt3_2	30860620	26712404	86.56	1.34	42.08	99.33	97.72
mrt3_3	31480390	28062850	89.14	1.4	43.8	99.47	98.13
mrt4_1	40654080	35951316	88.43	1.8	42.88	99.6	98.27
mrt4_2	40536236	35536882	87.67	1.78	43.2	99.4	97.85
mrt4_3	15374986	13568950	88.25	0.68	43.03	99.6	98.26
rt0_1	25610202	22643112	88.41	1.13	43.78	99.46	98.14
rt0_2	24056646	20936918	87.03	1.05	43.05	99.59	98.25
rt0_3	26792310	23553590	87.91	1.18	42.16	99.61	98.32
rt3_1	31824334	27713358	87.08	1.39	43.35	99.56	98.14
rt3_2	31292110	27771346	88.75	1.39	43.33	99.47	98.14
rt3_3	40517258	36078770	89.05	1.8	43.45	99.48	98.16
rt4_1	35757768	31059362	86.86	1.55	42.17	99.42	97.93
rt4_2	26127282	23062680	88.27	1.15	43.48	99.4	97.89
rt4_3	27436022	24329446	88.68	1.22	43.73	99.4	97.91
