# Supplementary material for: Genome-Wide Identification and Characterization of Potato Long Non-coding RNAs Associated With Phytophthora infestans Resistance
Source: Front Plant Sci. 2021 Feb 10;12:619062. doi: 10.3389/fpls.2021.619062 (PMC7902931; doi:10.3389/fpls.2021.619062)
Supplement: Supplementary Table 3 — Information on Illumina transcriptome-mapped potato reference genome sequence. [file Table_3.XLSX]

## Sheet: align_summary.all _2_
Sample name	ht0_1	ht0_2	ht0_3	ht3_1	ht3_2	ht3_3	ht4_1	ht4_2	ht4_3	mht0_1	mht0_2	mht0_3	mht3_1	mht3_2	mht3_3	mht4_1	mht4_2	mht4_3	mrt0_1	mrt0_2	mrt0_3	mrt3_1	mrt3_2	mrt3_3	mrt4_1	mrt4_2	mrt4_3	rt0_1	rt0_2	rt0_3	rt3_1	rt3_2	rt3_3	rt4_1	rt4_2	rt4_3
Total reads	13547154	20181378	13742680	13656068	23908340	19863934	14067954	16496730	29361034	16357594	14193456	14209190	14121604	23784652	37827548	14771306	15905412	22955050	25251924	20388512	47425762	40445446	26712404	28062850	35951316	35536882	13568950	22643112	20936918	23553590	27713358	27771346	36078770	31059362	23062680	24329446
Total mapped	11466599(84.64%)	17201195(85.23%)	9608524(69.92%)	11827712(86.61%)	20493093(85.72%)	15269845(76.87%)	12176128(86.55%)	14347485(86.97%)	23376303(79.62%)	13689549(83.69%)	12050692(84.90%)	11970665(84.25%)	12060036(85.40%)	20581628(86.53%)	32171741(85.05%)	12565682(85.07%)	13529122(85.06%)	19736255(85.98%)	21348072(84.54%)	17000513(83.38%)	40031310(84.41%)	34604855(85.56%)	22776171(85.26%)	23491793(83.71%)	30505196(84.85%)	30418293(85.60%)	11441079(84.32%)	18613441(82.20%)	17363329(82.93%)	19975560(84.81%)	23200710(83.72%)	23799964(85.70%)	30963793(85.82%)	26160056(84.23%)	19669907(85.29%)	20222646(83.12%)
Multiple mapped	876518(6.47%)	1520277(7.53%)	643431(4.68%)	759471(5.56%)	1467376(6.14%)	1019172(5.13%)	828295(5.89%)	924554(5.60%)	1349520(4.60%)	760263(4.65%)	748232(5.27%)	952891(6.71%)	960985(6.81%)	1534146(6.45%)	2282858(6.03%)	1009084(6.83%)	2143071(13.47%)	1585497(6.91%)	1824084(7.22%)	1174522(5.76%)	2663965(5.62%)	2682874(6.63%)	1549699(5.80%)	1801432(6.42%)	3129119(8.70%)	1818220(5.12%)	1179560(8.69%)	1924709(8.50%)	1520310(7.26%)	1669465(7.09%)	1577243(5.69%)	1621465(5.84%)	1945433(5.39%)	2217315(7.14%)	1448613(6.28%)	1352648(5.56%)
Uniquely mapped	10590081(78.17%)	15680918(77.70%)	8965093(65.24%)	11068241(81.05%)	19025717(79.58%)	14250673(71.74%)	11347833(80.66%)	13422931(81.37%)	22026783(75.02%)	12929286(79.04%)	11302460(79.63%)	11017774(77.54%)	11099051(78.60%)	19047482(80.08%)	29888883(79.01%)	11556598(78.24%)	11386051(71.59%)	18150758(79.07%)	19523988(77.32%)	15825991(77.62%)	37367345(78.79%)	31921981(78.93%)	21226472(79.46%)	21690361(77.29%)	27376077(76.15%)	28600073(80.48%)	10261519(75.63%)	16688732(73.70%)	15843019(75.67%)	18306095(77.72%)	21623467(78.03%)	22178499(79.86%)	29018360(80.43%)	23942741(77.09%)	18221294(79.01%)	18869998(77.56%)
Read-1	5295214(39.09%)	7839262(38.84%)	4481740(32.61%)	5534166(40.53%)	9519202(39.82%)	7126290(35.88%)	5675836(40.35%)	6714307(40.70%)	11017282(37.52%)	6465691(39.53%)	5652192(39.82%)	5508179(38.76%)	5550536(39.31%)	9524444(40.04%)	14935783(39.48%)	5779771(39.13%)	5694245(35.80%)	9080060(39.56%)	9768697(38.68%)	7910224(38.80%)	18699110(39.43%)	15959218(39.46%)	10618896(39.75%)	10851104(38.67%)	13695954(38.10%)	14312268(40.27%)	5133543(37.83%)	8351496(36.88%)	7926215(37.86%)	9158887(38.89%)	10813247(39.02%)	11096069(39.96%)	14506386(40.21%)	11979271(38.57%)	9119678(39.54%)	9430248(38.76%)
Read-2	5294867(39.08%)	7841656(38.86%)	4483353(32.62%)	5534075(40.52%)	9506515(39.76%)	7124383(35.87%)	5671997(40.32%)	6708624(40.67%)	11009501(37.50%)	6463595(39.51%)	5650268(39.81%)	5509595(38.77%)	5548515(39.29%)	9523038(40.04%)	14953100(39.53%)	5776827(39.11%)	5691806(35.79%)	9070698(39.52%)	9755291(38.63%)	7915767(38.82%)	18668235(39.36%)	15962763(39.47%)	10607576(39.71%)	10839257(38.62%)	13680123(38.05%)	14287805(40.21%)	5127976(37.79%)	8337236(36.82%)	7916804(37.81%)	9147208(38.84%)	10810220(39.01%)	11082430(39.91%)	14511974(40.22%)	11963470(38.52%)	9101616(39.46%)	9439750(38.80%)
Read map to '+'	5297742(39.11%)	7839233(38.84%)	4488242(32.66%)	5539268(40.56%)	9563218(40.00%)	7130366(35.90%)	5680049(40.38%)	6720009(40.74%)	11071923(37.71%)	6470327(39.56%)	5654096(39.84%)	5512110(38.79%)	5557020(39.35%)	9535184(40.09%)	15037313(39.75%)	5787931(39.18%)	5703287(35.86%)	9091650(39.61%)	9827902(38.92%)	7966435(39.07%)	18800569(39.64%)	16060240(39.71%)	10676430(39.97%)	10901870(38.85%)	13703212(38.12%)	14377264(40.46%)	5139474(37.88%)	8395175(37.08%)	7930183(37.88%)	9166227(38.92%)	10823928(39.06%)	11150460(40.15%)	14582555(40.42%)	12041779(38.77%)	9164737(39.74%)	9491056(39.01%)
Read map to '-'	5292339(39.07)	7841685(38.86)	4476851(32.58)	5528973(40.49)	9462499(39.58)	7120307(35.85)	5667784(40.29)	6702922(40.63)	10954860(37.31)	6458959(39.49)	5648364(39.80)	5505664(38.75)	5542031(39.25)	9512298(39.99)	14851570(39.26)	5768667(39.05)	5682764(35.73)	9059108(39.46)	9696086(38.40)	7859556(38.55)	18566776(39.15)	15861741(39.22)	10550042(39.49)	10788491(38.44)	13672865(38.03)	14222809(40.02)	5122045(37.75)	8293557(36.63)	7912836(37.79)	9139868(38.80)	10799539(38.97)	11028039(39.71)	14435805(40.01)	11900962(38.32)	9056557(39.27)	9378942(38.55)
Non-splice reads	9088002(67.08%)	13419333(66.49%)	7725570(56.22%)	9291069(68.04%)	15783452(66.02%)	11919747(60.01%)	9540999(67.82%)	11291075(68.44%)	18279238(62.26%)	11107377(67.90%)	9767382(68.82%)	9446537(66.48%)	9348482(66.20%)	15881973(66.77%)	24760144(65.46%)	9794697(66.31%)	9627174(60.53%)	15291155(66.61%)	16423321(65.04%)	13636177(66.88%)	31761739(66.97%)	26375526(65.21%)	17634548(66.02%)	17953429(63.98%)	22952344(63.84%)	23908023(67.28%)	8703806(64.15%)	14221173(62.81%)	13479666(64.38%)	15876260(67.40%)	17985811(64.90%)	18355136(66.09%)	24057183(66.68%)	20109043(64.74%)	15193362(65.88%)	15746763(64.72%)
Splice reads	1502079(11.09%)	2261585(11.21%)	1239523(9.02%)	1777172(13.01%)	3242265(13.56%)	2330926(11.73%)	1806834(12.84%)	2131856(12.92%)	3747545(12.76%)	1821909(11.14%)	1535078(10.82%)	1571237(11.06%)	1750569(12.40%)	3165509(13.31%)	5128739(13.56%)	1761901(11.93%)	1758877(11.06%)	2859603(12.46%)	3100667(12.28%)	2189814(10.74%)	5605606(11.82%)	5546455(13.71%)	3591924(13.45%)	3736932(13.32%)	4423733(12.30%)	4692050(13.20%)	1557713(11.48%)	2467559(10.90%)	2363353(11.29%)	2429835(10.32%)	3637656(13.13%)	3823363(13.77%)	4961177(13.75%)	3833698(12.34%)	3027932(13.13%)	3123235(12.84%)
Reads mapped in proper pairs	9493986(70.08%)	14040640(69.57%)	8015424(58.33%)	9964000(72.96%)	16920774(70.77%)	12818934(64.53%)	10163262(72.24%)	12074564(73.19%)	19647818(66.92%)	11591900(70.87%)	10139084(71.43%)	9891162(69.61%)	9960160(70.53%)	17177704(72.22%)	26594550(70.30%)	10368350(70.19%)	10214750(64.22%)	16331528(71.15%)	17350794(68.71%)	13939726(68.37%)	33094066(69.78%)	28362298(70.12%)	18805384(70.40%)	19379984(69.06%)	24536826(68.25%)	25559916(71.93%)	9175770(67.62%)	14825200(65.47%)	14153720(67.60%)	16124644(68.46%)	19514396(70.42%)	19703480(70.95%)	25935486(71.89%)	21210178(68.29%)	16073074(69.69%)	16704530(68.66%)
