# Supplementary material for: Genome-Wide Identification and Characterization of Potato Long Non-coding RNAs Associated With Phytophthora infestans Resistance
Source: Front Plant Sci. 2021 Feb 10;12:619062. doi: 10.3389/fpls.2021.619062 (PMC7902931; doi:10.3389/fpls.2021.619062)
Supplement: Supplementary Table 4 — The annotated information on all transcripts. [file Table_4.XLSX]

## Sheet: All.transcript.info
Transcripts	gene_name
PGSC0003DMT400089830	Gene of unknown function
PGSC0003DMT400036367	Gene of unknown function
PGSC0003DMT400094870	Gene of unknown function
PGSC0003DMT400036366	Serine carboxypeptidase III
PGSC0003DMT400088959	Integrase core domain containing protein
PGSC0003DMT400097336	Gene of unknown function
PGSC0003DMT400036364	Conserved gene of unknown function
PGSC0003DMT400051474	Protein SSU72
PGSC0003DMT400095667	N-acylethanolamine amidohydrolase
PGSC0003DMT400092875	Integrase core domain containing protein
PGSC0003DMT400085642	Conserved gene of unknown function
PGSC0003DMT400097056	Isopentenyltransferase
PGSC0003DMT400085545	Cytokinin biosynthetic isopentenyltransferase
PGSC0003DMT400068919	Isopentenyltransferase
PGSC0003DMT400095821	Gene of unknown function
PGSC0003DMT400086709	Isopentenyltransferase
PGSC0003DMT400091399	Isopentenyltransferase
PGSC0003DMT400088798	Gene of unknown function
PGSC0003DMT400056702	Conserved gene of unknown function
PGSC0003DMT400094369	Gene of unknown function
PGSC0003DMT400095899	Conserved gene of unknown function
PGSC0003DMT400091298	Gene of unknown function
PGSC0003DMT400089835	Gene of unknown function
PGSC0003DMT400003257	Cytochrome P450 92B1
PGSC0003DMT400095209	'chromo' domain containing protein
PGSC0003DMT400056810	Conserved gene of unknown function
PGSC0003DMT400088602	2-oxoglutarate-dependent dioxygenase
PGSC0003DMT400048624	Unknow protein
PGSC0003DMT400093736	Conserved gene of unknown function
PGSC0003DMT400088052	Gene of unknown function
PGSC0003DMT400096304	Conserved gene of unknown function
PGSC0003DMT400095169	Gene of unknown function
PGSC0003DMT400091903	Gene of unknown function
PGSC0003DMT400048627	Strictosidine synthase
PGSC0003DMT400090744	Gene of unknown function
PGSC0003DMT400048626	Strictosidine synthase
PGSC0003DMT400048633	Gene of unknown function
PGSC0003DMT400091630	Gene of unknown function
PGSC0003DMT400086552	Gene of unknown function
PGSC0003DMT400087346	Gene of unknown function
PGSC0003DMT400091581	Integrase core domain containing protein
PGSC0003DMT400056551	Gene of unknown function
PGSC0003DMT400089897	Gene of unknown function
PGSC0003DMT400089260	Conserved gene of unknown function
PGSC0003DMT400093512	Integrase core domain containing protein
PGSC0003DMT400094908	Gene of unknown function
PGSC0003DMT400084835	Gene of unknown function
PGSC0003DMT400086954	Gene of unknown function
PGSC0003DMT400090254	Conserved gene of unknown function
PGSC0003DMT400084750	Gene of unknown function
PGSC0003DMT400096486	Integrase core domain containing protein
PGSC0003DMT400095920	Integrase core domain containing protein
PGSC0003DMT400094348	Gene of unknown function
PGSC0003DMT400053593	Adenosine monophosphate binding protein 1 AMPBP1
PGSC0003DMT400090459	Gene of unknown function
PGSC0003DMT400094636	Singapore isolate B (sub-type 7) whole genome shotgun sequence assembly, scaffold_7
PGSC0003DMT400090664	Conserved gene of unknown function
PGSC0003DMT400093377	Gag-pol polyprotein
PGSC0003DMT400053591	Gene of unknown function
PGSC0003DMT400053592	Gene of unknown function
PGSC0003DMT400053589	Late blight resistance protein
PGSC0003DMT400053597	Zinc finger, CCHC-type
PGSC0003DMT400053585	Disease resistance protein R3a
PGSC0003DMT400089355	Gene of unknown function
PGSC0003DMT400091744	Gene of unknown function
PGSC0003DMT400093499	Gene of unknown function
PGSC0003DMT400088377	Gene of unknown function
PGSC0003DMT400096876	Gene of unknown function
PGSC0003DMT400095376	Gene of unknown function
PGSC0003DMT400085731	Gene of unknown function
PGSC0003DMT400087659	'chromo' domain containing protein
PGSC0003DMT400049007	Altered response to gravity (Arg1), plant
PGSC0003DMT400092289	Gene of unknown function
PGSC0003DMT400096792	Gene of unknown function
PGSC0003DMT400088373	Conserved gene of unknown function
PGSC0003DMT400093710	Gene of unknown function
PGSC0003DMT400089013	Gene of unknown function
PGSC0003DMT400089338	Gene of unknown function
PGSC0003DMT400017173	ABI3-interacting protein 3
PGSC0003DMT400088814	Gene of unknown function
PGSC0003DMT400017174	Photosystem I reaction center subunit V, chloroplast
PGSC0003DMT400085809	Gene of unknown function
PGSC0003DMT400086726	Conserved gene of unknown function
PGSC0003DMT400068755	S protein
PGSC0003DMT400091463	Conserved gene of unknown function
PGSC0003DMT400092157	Integrase core domain containing protein
PGSC0003DMT400096070	Gene of unknown function
PGSC0003DMT400048925	Adhesive plaque matrix protein
PGSC0003DMT400090564	Gene of unknown function
PGSC0003DMT400085876	Singapore isolate B (sub-type 7) whole genome shotgun sequence assembly, scaffold_9
PGSC0003DMT400048927	Nodulin / glutamate-ammonia ligase
PGSC0003DMT400048930	Gene of unknown function
PGSC0003DMT400048929	Glutamate-ammonia ligase
PGSC0003DMT400048932	Glutamate-ammonia ligase
PGSC0003DMT400048935	Glutamate-ammonia ligase
PGSC0003DMT400072173	TNP2-like transposon protein
PGSC0003DMT400087556	Conserved gene of unknown function
PGSC0003DMT400094234	Conserved gene of unknown function
PGSC0003DMT400094563	Gene of unknown function
PGSC0003DMT400059634	Gene of unknown function
PGSC0003DMT400087654	Gene of unknown function
PGSC0003DMT400095774	Gene of unknown function
PGSC0003DMT400094994	Gene of unknown function
PGSC0003DMT400093634	Gene of unknown function
PGSC0003DMT400088076	Gene of unknown function
PGSC0003DMT400093685	Gene of unknown function
PGSC0003DMT400085307	Conserved gene of unknown function
PGSC0003DMT400088827	Gene of unknown function
PGSC0003DMT400085853	Gene of unknown function
PGSC0003DMT400097531	Gene of unknown function
PGSC0003DMT400049464	Gene of unknown function
PGSC0003DMT400097661	Gene of unknown function
PGSC0003DMT400085858	Gene of unknown function
PGSC0003DMT400095536	Conserved gene of unknown function
PGSC0003DMT400093888	Gene of unknown function
PGSC0003DMT400090028	Gene of unknown function
PGSC0003DMT400048986	Choline/ethanolamine kinase
PGSC0003DMT400025303	Gene of unknown function
PGSC0003DMT400084890	Late blight resistance protein
PGSC0003DMT400094893	Gene of unknown function
PGSC0003DMT400097780	Gene of unknown function
PGSC0003DMT400025307	Gene of unknown function
PGSC0003DMT400096717	Gene of unknown function
PGSC0003DMT400095993	Gene of unknown function
PGSC0003DMT400085660	Polyprotein protein
PGSC0003DMT400086736	Gene of unknown function
PGSC0003DMT400094889	Gene of unknown function
PGSC0003DMT400084745	Gene of unknown function
PGSC0003DMT400034280	Phytol kinase 1, chloroplast
PGSC0003DMT400091684	Gene of unknown function
PGSC0003DMT400092846	Gene of unknown function
PGSC0003DMT400095707	Integrase core domain containing protein
PGSC0003DMT400086787	Integrase core domain containing protein
PGSC0003DMT400094789	Gene of unknown function
PGSC0003DMT400068745	Transporter
PGSC0003DMT400068744	Gene of unknown function
PGSC0003DMT400085178	Gene of unknown function
PGSC0003DMT400086412	Gene of unknown function
PGSC0003DMT400068740	Conserved gene of unknown function
PGSC0003DMT400085085	Gene of unknown function
PGSC0003DMT400090104	Gene of unknown function
PGSC0003DMT400096002	Gene of unknown function
PGSC0003DMT400085803	Gene of unknown function
PGSC0003DMT400090958	Gene of unknown function
PGSC0003DMT400095264	Conserved gene of unknown function
PGSC0003DMT400051404	Ethylene response factor 3
PGSC0003DMT400094677	Gene of unknown function
PGSC0003DMT400086106	Gene of unknown function
PGSC0003DMT400097540	Gene of unknown function
PGSC0003DMT400081719	White-brown-complex ABC transporter family
PGSC0003DMT400087707	Gene of unknown function
PGSC0003DMT400094779	Gene of unknown function
PGSC0003DMT400092849	Gene of unknown function
PGSC0003DMT400097147	Gene of unknown function
PGSC0003DMT400086772	Gag-pol polyprotein
PGSC0003DMT400089112	Gene of unknown function
PGSC0003DMT400089646	Integrase core domain containing protein
PGSC0003DMT400087536	Gene of unknown function
PGSC0003DMT400085371	Gene of unknown function
PGSC0003DMT400096255	Gene of unknown function
PGSC0003DMT400088970	Gene of unknown function
PGSC0003DMT400097005	Polyprotein protein
PGSC0003DMT400093757	Gag protein
PGSC0003DMT400085735	Gene of unknown function
PGSC0003DMT400090209	Gene of unknown function
PGSC0003DMT400095282	Gene of unknown function
PGSC0003DMT400092848	Gene of unknown function
PGSC0003DMT400086489	Polyprotein protein
PGSC0003DMT400086855	Integrase core domain containing protein
PGSC0003DMT400090932	Gene of unknown function
PGSC0003DMT400095869	Gene of unknown function
PGSC0003DMT400091795	Gene of unknown function
PGSC0003DMT400087182	Integrase core domain containing protein
PGSC0003DMT400092340	Polyprotein protein
PGSC0003DMT400092254	Gene of unknown function
PGSC0003DMT400046218	Nodulation receptor kinase
PGSC0003DMT400093665	Conserved gene of unknown function
PGSC0003DMT400088543	Gene of unknown function
PGSC0003DMT400086391	Gene of unknown function
PGSC0003DMT400046214	Ubiquitin-protein ligase
PGSC0003DMT400091549	Gene of unknown function
PGSC0003DMT400093091	Gene of unknown function
PGSC0003DMT400065875	Gene of unknown function
PGSC0003DMT400065867	Choline/ethanolamine kinase
PGSC0003DMT400065859	Conserved gene of unknown function
PGSC0003DMT400086882	Gene of unknown function
PGSC0003DMT400088706	Gene of unknown function
PGSC0003DMT400090070	Gene of unknown function
PGSC0003DMT400090940	Gene of unknown function
PGSC0003DMT400087225	Gene of unknown function
PGSC0003DMT400091516	Gene of unknown function
PGSC0003DMT400089523	Gene of unknown function
PGSC0003DMT400086175	Conserved gene of unknown function
PGSC0003DMT400035630	Conserved gene of unknown function
PGSC0003DMT400088633	Gene of unknown function
PGSC0003DMT400090477	Gene of unknown function
PGSC0003DMT400091544	Gene of unknown function
PGSC0003DMT400035632	Conserved gene of unknown function
PGSC0003DMT400035640	Gene of unknown function
PGSC0003DMT400035638	Aquaporin, MIP family, NIP subfamily
PGSC0003DMT400085316	Integrase core domain containing protein
PGSC0003DMT400086289	Retrotransposon gag protein
PGSC0003DMT400094241	Integrase core domain containing protein
PGSC0003DMT400089467	Integrase core domain containing protein
PGSC0003DMT400091364	Polyprotein
PGSC0003DMT400086445	Conserved gene of unknown function
PGSC0003DMT400097668	Conserved gene of unknown function
PGSC0003DMT400091599	Gene of unknown function
PGSC0003DMT400096736	Gene of unknown function
PGSC0003DMT400096767	Gene of unknown function
PGSC0003DMT400088772	Conserved gene of unknown function
PGSC0003DMT400094093	Gene of unknown function
PGSC0003DMT400092461	Gene of unknown function
PGSC0003DMT400035635	Zinc finger-homeodomain protein 1
PGSC0003DMT400088189	Gene of unknown function
PGSC0003DMT400093346	Gene of unknown function
PGSC0003DMT400089666	Integrase core domain containing protein
PGSC0003DMT400088000	Integrase core domain containing protein
PGSC0003DMT400088987	Conserved gene of unknown function
PGSC0003DMT400035636	Elicitor-inducible cytochrome P450
PGSC0003DMT400090931	Gene of unknown function
PGSC0003DMT400090573	Integrase core domain containing protein
PGSC0003DMT400093533	Gene of unknown function
PGSC0003DMT400091132	Conserved gene of unknown function
PGSC0003DMT400092867	Gene of unknown function
PGSC0003DMT400084803	F-box and wd40 domain protein
PGSC0003DMT400085705	Gene of unknown function
PGSC0003DMT400087388	Gene of unknown function
PGSC0003DMT400096148	Gene of unknown function
PGSC0003DMT400085810	Gene of unknown function
PGSC0003DMT400089170	Gene of unknown function
PGSC0003DMT400094078	Gene of unknown function
PGSC0003DMT400086502	Gene of unknown function
PGSC0003DMT400095226	Gene of unknown function
PGSC0003DMT400036540	Gene of unknown function
PGSC0003DMT400036542	Gene of unknown function
PGSC0003DMT400093188	Gene of unknown function
PGSC0003DMT400008747	NADH ubiquinone oxidoreductase B14 subunit
PGSC0003DMT400092028	Gene of unknown function
PGSC0003DMT400096813	Gene of unknown function
PGSC0003DMT400094841	Conserved gene of unknown function
PGSC0003DMT400028503	Apocytochrome f
PGSC0003DMT400080835	CST complex subunit CTC1
PGSC0003DMT400022675	Conserved gene of unknown function
PGSC0003DMT400022676	Ribosomal protein large subunit 2
PGSC0003DMT400022677	Gene of unknown function
PGSC0003DMT400096450	Polyprotein protein
PGSC0003DMT400091577	Conserved gene of unknown function
PGSC0003DMT400086739	Conserved gene of unknown function
PGSC0003DMT400085160	Gene of unknown function
PGSC0003DMT400097698	Gene of unknown function
PGSC0003DMT400094669	Gene of unknown function
PGSC0003DMT400088872	Gene of unknown function
PGSC0003DMT400094033	Gene of unknown function
PGSC0003DMT400087018	Gene of unknown function
PGSC0003DMT400028114	Gene of unknown function
PGSC0003DMT400084315	Gene of unknown function
PGSC0003DMT400091809	Flocculin, partial
PGSC0003DMT400016788	Gene of unknown function
PGSC0003DMT400089380	Gene of unknown function
PGSC0003DMT400086833	Gene of unknown function
PGSC0003DMT400087587	Gene of unknown function
PGSC0003DMT400090724	Gene of unknown function
PGSC0003DMT400016786	Alphavirus core protein family
PGSC0003DMT400085513	Gene of unknown function
PGSC0003DMT400016783	ATP binding protein
PGSC0003DMT400093300	Gene of unknown function
PGSC0003DMT400084998	Gene of unknown function
PGSC0003DMT400019283	Fkbp-rapamycin associated protein
PGSC0003DMT400090820	Gene of unknown function
PGSC0003DMT400019270	Gene of unknown function
PGSC0003DMT400092582	Movement protein
PGSC0003DMT400019265	Gene of unknown function
PGSC0003DMT400088806	Gene of unknown function
PGSC0003DMT400087005	Gene of unknown function
PGSC0003DMT400097187	Integrase core domain containing protein
PGSC0003DMT400096436	Integrase core domain containing protein
PGSC0003DMT400093521	Conserved gene of unknown function
PGSC0003DMT400090266	Integrase core domain containing protein
PGSC0003DMT400050328	Stromal antigen
PGSC0003DMT400050326	Stromal antigen
PGSC0003DMT400094940	Gene of unknown function
PGSC0003DMT400086830	Gene of unknown function
PGSC0003DMT400092250	Histidine-rich protein
PGSC0003DMT400096901	Gene of unknown function
PGSC0003DMT400090142	Gene of unknown function
PGSC0003DMT400093713	Retrotransposon
PGSC0003DMT400090301	Gene of unknown function
PGSC0003DMT400096041	Gene of unknown function
PGSC0003DMT400091730	Gene of unknown function
PGSC0003DMT400091026	Gene of unknown function
PGSC0003DMT400091550	RNase H family protein
PGSC0003DMT400093637	RNase H family protein
PGSC0003DMT400085257	Non-LTR retroelement reverse transcriptase
PGSC0003DMT400090727	Conserved gene of unknown function
PGSC0003DMT400095357	LINE-type retrotransposon LIb DNA, complete sequence, Insertion at the S14 site
PGSC0003DMT400087802	Gene of unknown function
PGSC0003DMT400089997	Integrase core domain containing protein
PGSC0003DMT400094641	Gene of unknown function
PGSC0003DMT400087108	Gene of unknown function
PGSC0003DMT400091761	RNase H family protein
PGSC0003DMT400097301	RNase H family protein
PGSC0003DMT400086926	Gene of unknown function
PGSC0003DMT400092013	Gene of unknown function
PGSC0003DMT400090532	RNase H family protein
PGSC0003DMT400095604	RNase H family protein
PGSC0003DMT400094144	Gene of unknown function
PGSC0003DMT400086149	Retrotransposon protein, unclassified
PGSC0003DMT400089223	Gene of unknown function
PGSC0003DMT400086600	Gene of unknown function
PGSC0003DMT400091255	Integrase core domain containing protein
PGSC0003DMT400095972	Integrase core domain containing protein
PGSC0003DMT400095731	Gene of unknown function
PGSC0003DMT400085328	Gene of unknown function
PGSC0003DMT400092975	Gene of unknown function
PGSC0003DMT400095747	Gene of unknown function
PGSC0003DMT400087365	Gene of unknown function
PGSC0003DMT400028367	DNA binding protein
PGSC0003DMT400086660	Gene of unknown function
PGSC0003DMT400074825	Tryptophan aminotransferase
PGSC0003DMT400074827	Alliin lyase
PGSC0003DMT400088020	Gene of unknown function
PGSC0003DMT400095891	Gene of unknown function
PGSC0003DMT400094418	GE24176
PGSC0003DMT400092077	Conserved gene of unknown function
PGSC0003DMT400074829	Low-CO2-inducible protein
PGSC0003DMT400091658	Gene of unknown function
PGSC0003DMT400089472	Integrase core domain containing protein
PGSC0003DMT400097438	Zinc finger, RING-type
PGSC0003DMT400095943	Gene of unknown function
PGSC0003DMT400038891	TMV resistance protein N
PGSC0003DMT400097322	Gag-pol polyprotein
PGSC0003DMT400092145	Zinc finger, RING-type
PGSC0003DMT400095278	Gene of unknown function
PGSC0003DMT400071793	Conserved gene of unknown function
PGSC0003DMT400089315	Gene of unknown function
PGSC0003DMT400084956	Resistance gene
PGSC0003DMT400089996	Bacterial spot disease resistance protein 4
PGSC0003DMT400071802	TRNA-dihydrouridine synthase
PGSC0003DMT400071795	NL27
PGSC0003DMT400071797	Leucine Rich Repeat family protein
PGSC0003DMT400087207	Gene of unknown function
PGSC0003DMT400087092	Gene of unknown function
PGSC0003DMT400094070	Nuclear protein
PGSC0003DMT400062733	Leucine Rich Repeat family protein
PGSC0003DMT400085474	Zinc finger, RING-type
PGSC0003DMT400004894	Gene of unknown function
PGSC0003DMT400004838	Nuclease
PGSC0003DMT400004842	F-box and wd40 domain protein
PGSC0003DMT400004843	Matrix metalloprotease 1
PGSC0003DMT400004845	Matrix metalloprotease 1
PGSC0003DMT400004846	Conserved gene of unknown function
PGSC0003DMT400004806	Phosphoglucomutase
PGSC0003DMT400004849	Conserved gene of unknown function
PGSC0003DMT400004850	LATD/NIP
PGSC0003DMT400004851	Pyruvate dehydrogenase E1 component subunit alpha, mitochondrial
PGSC0003DMT400004852	Conserved gene of unknown function
PGSC0003DMT400004809	Transcription factor
PGSC0003DMT400004853	Serine/threonine-protein phosphatase
PGSC0003DMT400004810	(-)-germacrene D synthase
PGSC0003DMT400004855	MYC1
PGSC0003DMT400004856	Conserved gene of unknown function
PGSC0003DMT400004816	Flavonoid 3-hydroxylase
PGSC0003DMT400004861	6-phosphogluconate dehydrogenase, decarboxylating
PGSC0003DMT400004821	Ocs element-binding factor
PGSC0003DMT400004826	2-oxoglutarate decarboxylase/ hydro-lyase/ magnesium ion binding / thiamin pyrophosphate binding
PGSC0003DMT400004830	Transcription factor bHLH49
PGSC0003DMT400004867	DNA methyltransferase
PGSC0003DMT400004895	Methyladenine glycosylase family protein
PGSC0003DMT400004869	Inositol or phosphatidylinositol kinase
PGSC0003DMT400004832	BHLH domain class transcription factor
PGSC0003DMT400004871	Conserved gene of unknown function
PGSC0003DMT400004873	Ethanol tolerance protein GEKO1
PGSC0003DMT400004836	Translin family protein
PGSC0003DMT400004875	MADS-box transcription factor FBP4
PGSC0003DMT400004878	UDP-glucose:protein transglucosylase
PGSC0003DMT400004879	Peptidyl-prolyl cis-trans isomerase E
PGSC0003DMT400004882	Cytochrome P450
PGSC0003DMT400004888	Cytochrome P450
PGSC0003DMT400004890	Cytochrome P450
PGSC0003DMT400004881	Cytochrome P450
PGSC0003DMT400004893	Cytochrome P450
PGSC0003DMT400086968	Gene of unknown function
PGSC0003DMT400089385	Gag-pol polyprotein
PGSC0003DMT400087941	Gag-pol polyprotein
PGSC0003DMT400095565	Gene of unknown function
PGSC0003DMT400094510	Gene of unknown function
PGSC0003DMT400092246	Gene of unknown function
PGSC0003DMT400011317	Glycosyltransferase QUASIMODO1
PGSC0003DMT400089850	Gene of unknown function
PGSC0003DMT400085519	Gag-pol polyprotein
PGSC0003DMT400088310	Gene of unknown function
PGSC0003DMT400090980	Gene of unknown function
PGSC0003DMT400096999	Gene of unknown function
PGSC0003DMT400096003	Gene of unknown function
PGSC0003DMT400095643	Gene of unknown function
PGSC0003DMT400091528	Gene of unknown function
PGSC0003DMT400085687	Gene of unknown function
PGSC0003DMT400086528	Conserved gene of unknown function
PGSC0003DMT400089539	Gene of unknown function
PGSC0003DMT400043642	Gene of unknown function
PGSC0003DMT400096039	Gene of unknown function
PGSC0003DMT400043645	Gene of unknown function
PGSC0003DMT400043644	Gene of unknown function
PGSC0003DMT400093228	Myb119
PGSC0003DMT400091798	Gene of unknown function
PGSC0003DMT400087071	Gene of unknown function
PGSC0003DMT400088062	Gene of unknown function
PGSC0003DMT400088509	Gene of unknown function
PGSC0003DMT400085736	Gene of unknown function
PGSC0003DMT400090004	Gene of unknown function
PGSC0003DMT400028302	Gene of unknown function
PGSC0003DMT400028296	Gene of unknown function
PGSC0003DMT400028298	Amino acid transporter
PGSC0003DMT400028299	Conserved gene of unknown function
PGSC0003DMT400094917	Gene of unknown function
PGSC0003DMT400096327	Gene of unknown function
PGSC0003DMT400091996	Gene of unknown function
PGSC0003DMT400075084	Gene of unknown function
PGSC0003DMT400075074	Vetispiradiene synthase
PGSC0003DMT400075073	Exonuclease
PGSC0003DMT400087191	Gene of unknown function
PGSC0003DMT400091442	Gene of unknown function
PGSC0003DMT400086706	Gag-pol polyprotein
PGSC0003DMT400087457	Transposon protein, CACTA, En/Spm sub-class
PGSC0003DMT400088821	Gene of unknown function
PGSC0003DMT400087998	Integrase core domain containing protein
PGSC0003DMT400096403	Integrase core domain containing protein
PGSC0003DMT400056764	Gene of unknown function
PGSC0003DMT400093067	Gene of unknown function
PGSC0003DMT400056766	Electron transporter
PGSC0003DMT400094008	Gene of unknown function
PGSC0003DMT400087774	Gene of unknown function
PGSC0003DMT400084871	Gene of unknown function
PGSC0003DMT400094297	Conserved gene of unknown function
PGSC0003DMT400091597	Gag-pol polyprotein
PGSC0003DMT400045649	Conserved gene of unknown function
PGSC0003DMT400045652	Zinc finger protein
PGSC0003DMT400045654	Ribosomal protein S10, eukaryotic and archaeal form
PGSC0003DMT400045650	Gene of unknown function
PGSC0003DMT400095856	Gene of unknown function
PGSC0003DMT400097176	Conserved gene of unknown function
PGSC0003DMT400092129	Gene of unknown function
PGSC0003DMT400093657	Gene of unknown function
PGSC0003DMT400088550	Gene of unknown function
PGSC0003DMT400089677	Gene of unknown function
PGSC0003DMT400085725	Gene of unknown function
PGSC0003DMT400090975	Gene of unknown function
PGSC0003DMT400093062	Gene of unknown function
PGSC0003DMT400089187	Gene of unknown function
PGSC0003DMT400092974	Bifunctional endo-1,4-beta-xylanase xylA
PGSC0003DMT400087158	Gene of unknown function
PGSC0003DMT400089306	GA24436
PGSC0003DMT400090748	Gene of unknown function
PGSC0003DMT400085596	Gene of unknown function
PGSC0003DMT400097636	Gene of unknown function
PGSC0003DMT400091875	Integrase core domain containing protein
PGSC0003DMT400085361	Integrase core domain containing protein
PGSC0003DMT400093318	Gene of unknown function
PGSC0003DMT400089233	Gene of unknown function
PGSC0003DMT400059918	Gene of unknown function
PGSC0003DMT400097484	Late blight resistance protein
PGSC0003DMT400091540	Gene of unknown function
PGSC0003DMT400086123	Polyprotein protein
PGSC0003DMT400096218	Gene of unknown function
PGSC0003DMT400094832	Gene of unknown function
PGSC0003DMT400089711	SRF-type transcription factor family protein
PGSC0003DMT400086220	Conserved gene of unknown function
PGSC0003DMT400093461	Conserved gene of unknown function
PGSC0003DMT400093513	Conserved gene of unknown function
PGSC0003DMT400088339	Retrotransposon protein
PGSC0003DMT400096738	Gene of unknown function
PGSC0003DMT400043360	SRF-type transcription factor family protein
PGSC0003DMT400093824	Gene of unknown function
PGSC0003DMT400095564	Gene of unknown function
PGSC0003DMT400094163	Gene of unknown function
PGSC0003DMT400043364	Gene of unknown function
PGSC0003DMT400043366	SRF-type transcription factor family protein
PGSC0003DMT400088384	Gag-pol polyprotein
PGSC0003DMT400087573	Gene of unknown function
PGSC0003DMT400093860	Gene of unknown function
PGSC0003DMT400089366	Gene of unknown function
PGSC0003DMT400096752	Gene of unknown function
PGSC0003DMT400086952	Gene of unknown function
PGSC0003DMT400092037	Gene of unknown function
PGSC0003DMT400096757	Gene of unknown function
PGSC0003DMT400088717	Cylicin-2
PGSC0003DMT400086368	Gene of unknown function
PGSC0003DMT400091634	Gene of unknown function
PGSC0003DMT400088899	ATP binding protein
PGSC0003DMT400089686	Integrase core domain containing protein
PGSC0003DMT400093701	Cytokinin biosynthetic isopentenyltransferase
PGSC0003DMT400068836	Isopentenyl transferase IPT4
PGSC0003DMT400088770	ATP binding protein
PGSC0003DMT400093314	Isopentenyltransferase
PGSC0003DMT400091503	ATP binding protein
PGSC0003DMT400085014	ATP binding protein
PGSC0003DMT400090194	Gag-pol polyprotein
PGSC0003DMT400085869	Isopentenyltransferase
PGSC0003DMT400093770	Isopentenyltransferase
PGSC0003DMT400089538	Gene of unknown function
PGSC0003DMT400093863	Gene of unknown function
PGSC0003DMT400090716	Gene of unknown function
PGSC0003DMT400089234	Gene of unknown function
PGSC0003DMT400088582	Gene of unknown function
PGSC0003DMT400056627	Class S F-box protein
PGSC0003DMT400088442	Conserved gene of unknown function
PGSC0003DMT400093198	Gene of unknown function
PGSC0003DMT400096933	Integrase core domain containing protein
PGSC0003DMT400089285	Gene of unknown function
PGSC0003DMT400095826	Gene of unknown function
PGSC0003DMT400087114	Zinc knuckle family protein
PGSC0003DMT400080328	Gene of unknown function
PGSC0003DMT400080330	Leucoanthocyanidin dioxygenase
PGSC0003DMT400062777	2-oxoglutarate-dependent dioxygenase
PGSC0003DMT400087033	2-oxoglutarate-dependent dioxygenase
PGSC0003DMT400056323	Gene of unknown function
PGSC0003DMT400056326	Reverse transcriptase
PGSC0003DMT400056327	Conserved gene of unknown function
PGSC0003DMT400056336	Conserved gene of unknown function
PGSC0003DMT400096816	Gene of unknown function
PGSC0003DMT400056340	Conserved gene of unknown function
PGSC0003DMT400056343	6-phosphogluconolactonase
PGSC0003DMT400091529	Cytochrome P450
PGSC0003DMT400056345	SP1L
PGSC0003DMT400095379	Avr9/Cf-9 rapidly elicited protein 246
PGSC0003DMT400093630	MES13 (METHYL ESTERASE 13)
PGSC0003DMT400056338	Bacterial spot disease resistance protein 4
PGSC0003DMT400056347	Conserved gene of unknown function
PGSC0003DMT400056339	Gene of unknown function
PGSC0003DMT400056351	Gene of unknown function
PGSC0003DMT400094814	Gene of unknown function
PGSC0003DMT400095613	Conserved gene of unknown function
PGSC0003DMT400044001	DNA topoisomerase 6 subunit B
PGSC0003DMT400044018	Gene of unknown function
PGSC0003DMT400044017	Conserved gene of unknown function
PGSC0003DMT400043995	Type II DNA topoisomerase VI subunit B
PGSC0003DMT400087527	Conserved gene of unknown function
PGSC0003DMT400044015	UDP-glucosyltransferase
PGSC0003DMT400044014	UDP-glucosyltransferase
PGSC0003DMT400095541	Conserved gene of unknown function
PGSC0003DMT400094343	LINE-type retrotransposon LIb DNA, complete sequence, Insertion at the S14 site
PGSC0003DMT400096737	Conserved gene of unknown function
PGSC0003DMT400087154	Histidine-rich glycoprotein
PGSC0003DMT400084961	Gene of unknown function
PGSC0003DMT400089179	Gene of unknown function
PGSC0003DMT400025134	Hydrolase, acting on ester bonds
PGSC0003DMT400092862	Gene of unknown function
PGSC0003DMT400095585	Multidrug resistance protein ABC transporter family
PGSC0003DMT400096253	Gene of unknown function
PGSC0003DMT400092264	Gene of unknown function
PGSC0003DMT400068894	Conserved gene of unknown function
PGSC0003DMT400095428	Gene of unknown function
PGSC0003DMT400085494	Gene of unknown function
PGSC0003DMT400093946	Gag-pol polyprotein
PGSC0003DMT400095382	Gene of unknown function
PGSC0003DMT400085891	Gene of unknown function
PGSC0003DMT400087119	Reverse transcriptase
PGSC0003DMT400077862	Protein kinase-coding resistance protein
PGSC0003DMT400087951	Gene of unknown function
PGSC0003DMT400097310	Integrase core domain containing protein
PGSC0003DMT400095435	Gene of unknown function
PGSC0003DMT400089344	Gene of unknown function
PGSC0003DMT400088410	Gene of unknown function
PGSC0003DMT400089810	Gene of unknown function
PGSC0003DMT400092204	Gene of unknown function
PGSC0003DMT400087950	Gene of unknown function
PGSC0003DMT400085644	Gag-pol polyprotein
PGSC0003DMT400087065	Gene of unknown function
PGSC0003DMT400095913	Conserved gene of unknown function
PGSC0003DMT400085970	Gene of unknown function
PGSC0003DMT400093673	Uncharacterized histidine-rich protein DDB_G0274557
PGSC0003DMT400085330	Gene of unknown function
PGSC0003DMT400088854	CG15040
PGSC0003DMT400088301	CG6004
PGSC0003DMT400090121	Uncharacterized histidine-rich protein DDB_G0274557
PGSC0003DMT400043884	Gene of unknown function
PGSC0003DMT400086279	RNase H family protein
PGSC0003DMT400091694	Gene of unknown function
PGSC0003DMT400095634	Bifunctional endo-1,4-beta-xylanase xylA
PGSC0003DMT400094273	Gene of unknown function
PGSC0003DMT400091571	Gene of unknown function
PGSC0003DMT400088724	Gene of unknown function
PGSC0003DMT400088395	Gene of unknown function
PGSC0003DMT400090565	Gene of unknown function
PGSC0003DMT400077507	Kinase
PGSC0003DMT400077513	Gene of unknown function
PGSC0003DMT400077519	Kinase
PGSC0003DMT400077520	Gene of unknown function
PGSC0003DMT400077523	Conserved gene of unknown function
PGSC0003DMT400077522	Late blight resistance protein
PGSC0003DMT400096207	Gene of unknown function
PGSC0003DMT400062652	Gene of unknown function
PGSC0003DMT400093168	Gene of unknown function
PGSC0003DMT400062654	Gag/pol polyprotein
PGSC0003DMT400085916	Gene of unknown function
PGSC0003DMT400085276	Integrase core domain containing protein
PGSC0003DMT400086723	Integrase core domain containing protein
PGSC0003DMT400087444	Gene of unknown function
PGSC0003DMT400095655	Gene of unknown function
PGSC0003DMT400088552	Isopentenyltransferase
PGSC0003DMT400093491	ATP binding protein
PGSC0003DMT400065964	Potassium channel NtKC1
PGSC0003DMT400065960	Conserved gene of unknown function
PGSC0003DMT400065957	F-box protein
PGSC0003DMT400065954	F-box protein
PGSC0003DMT400036262	Gene of unknown function
PGSC0003DMT400036257	Serine-threonine protein kinase, plant-type
PGSC0003DMT400036260	Gene of unknown function
PGSC0003DMT400036255	Conserved gene of unknown function
PGSC0003DMT400087994	Ulp1 protease family, C-terminal catalytic domain containing protein
PGSC0003DMT400036250	Serine-threonine protein kinase, plant-type
PGSC0003DMT400036249	Conserved gene of unknown function
PGSC0003DMT400096394	Transposon MuDR mudrA
PGSC0003DMT400036243	Serine-threonine protein kinase, plant-type
PGSC0003DMT400020048	Serine-threonine protein kinase, plant-type
PGSC0003DMT400086879	Serine-threonine protein kinase, plant-type
PGSC0003DMT400095601	Gene of unknown function
PGSC0003DMT400087677	Gene of unknown function
PGSC0003DMT400096871	Gene of unknown function
PGSC0003DMT400094820	Gene of unknown function
PGSC0003DMT400093136	Gene of unknown function
PGSC0003DMT400097443	Gene of unknown function
PGSC0003DMT400085053	Gene of unknown function
PGSC0003DMT400089203	Gene of unknown function
PGSC0003DMT400088175	Gene of unknown function
PGSC0003DMT400087728	Gag-pol polyprotein
PGSC0003DMT400089648	Gene of unknown function
PGSC0003DMT400090620	Gag-pol polyprotein
PGSC0003DMT400095656	Gene of unknown function
PGSC0003DMT400072012	12-oxophytodienoate reductase 1
PGSC0003DMT400072010	Ulp1 protease family, C-terminal catalytic domain containing protein
PGSC0003DMT400091953	Gene of unknown function
PGSC0003DMT400089022	Gene of unknown function
PGSC0003DMT400072016	Short chain alcohol dehydrogenase
PGSC0003DMT400072021	Short chain alcohol dehydrogenase
PGSC0003DMT400097650	Gene of unknown function
PGSC0003DMT400087372	Gene of unknown function
PGSC0003DMT400090358	Gene of unknown function
PGSC0003DMT400084879	Gene of unknown function
PGSC0003DMT400086585	Gene of unknown function
PGSC0003DMT400088535	Gene of unknown function
PGSC0003DMT400088695	Gene of unknown function
PGSC0003DMT400049012	Serine-threonine protein kinase, plant-type
PGSC0003DMT400049019	Serine-threonine protein kinase, plant-type
PGSC0003DMT400039109	Serine-threonine protein kinase, plant-type
PGSC0003DMT400093542	Conserved gene of unknown function
PGSC0003DMT400024908	Bacterial spot disease resistance protein 4
PGSC0003DMT400024909	Resistance gene
PGSC0003DMT400024960	N protein
PGSC0003DMT400024961	Retrotransposon protein
PGSC0003DMT400024964	Gene of unknown function
PGSC0003DMT400024924	Bacterial spot disease resistance protein 4
PGSC0003DMT400024925	Conserved gene of unknown function
PGSC0003DMT400024929	N protein
PGSC0003DMT400024954	Sinapyl alcohol dehydrogenase 2
PGSC0003DMT400024956	Sinapyl alcohol dehydrogenase 2
PGSC0003DMT400024931	Bacterial spot disease resistance protein 4
PGSC0003DMT400024933	Gene of unknown function
PGSC0003DMT400069016	Gene of unknown function
PGSC0003DMT400096498	Gene of unknown function
PGSC0003DMT400092529	Gene of unknown function
PGSC0003DMT400087874	Gene of unknown function
PGSC0003DMT400059761	Gene of unknown function
PGSC0003DMT400059759	Conserved gene of unknown function
PGSC0003DMT400059755	Sn-1 protein
PGSC0003DMT400059754	Sn-2 protein
PGSC0003DMT400059752	Sn-1 protein
PGSC0003DMT400059751	Sn-1 protein
PGSC0003DMT400059750	Sn-1 protein
PGSC0003DMT400049065	Orf147a protein
PGSC0003DMT400093098	Sn-1 protein
PGSC0003DMT400049062	Sn-1 protein
PGSC0003DMT400090746	Endochitinase
PGSC0003DMT400039026	RPGR ORF15 isoform
PGSC0003DMT400094475	Gene of unknown function
PGSC0003DMT400089351	Gene of unknown function
PGSC0003DMT400090433	Gene of unknown function
PGSC0003DMT400069030	Endochitinase 3
PGSC0003DMT400069033	Endochitinase 2
PGSC0003DMT400069034	Endochitinase 4
PGSC0003DMT400086221	RNase H family protein
PGSC0003DMT400087190	Glycosyltransferase PglE
PGSC0003DMT400089744	Gag-pol protein
PGSC0003DMT400085074	Gene of unknown function
PGSC0003DMT400093433	RNase H family protein
PGSC0003DMT400088738	Gene of unknown function
PGSC0003DMT400097156	RNA-directed DNA polymerase (Reverse transcriptase)
PGSC0003DMT400092297	Endonuclease/exonuclease/phosphatase
PGSC0003DMT400059683	CLE family OsCLE801 protein
PGSC0003DMT400059678	Leucine-rich repeat-containing protein
PGSC0003DMT400087110	Zinc finger protein
PGSC0003DMT400090484	Gene of unknown function
PGSC0003DMT400059679	Gene of unknown function
PGSC0003DMT400059674	Gene of unknown function
PGSC0003DMT400093998	Zinc finger protein
PGSC0003DMT400059682	DNA binding protein
PGSC0003DMT400092820	Bifunctional endo-1,4-beta-xylanase xylA
PGSC0003DMT400087716	Gene of unknown function
PGSC0003DMT400089135	GJ10070
PGSC0003DMT400097161	Gene of unknown function
PGSC0003DMT400089544	Integrase core domain containing protein
PGSC0003DMT400022585	Fkbp-rapamycin associated protein
PGSC0003DMT400094673	Gene of unknown function
PGSC0003DMT400090002	Integrase core domain containing protein
PGSC0003DMT400031199	Non-specific lipid-transfer protein
PGSC0003DMT400031200	Non-specific lipid-transfer protein
PGSC0003DMT400031201	Non-specific lipid-transfer protein 2
PGSC0003DMT400031202	Non-specific lipid-transfer protein 1
PGSC0003DMT400031193	Gene of unknown function
PGSC0003DMT400031195	Cationic peroxidase 1
PGSC0003DMT400031203	Non-specific lipid-transfer protein 2
PGSC0003DMT400031196	Non-specific lipid-transfer protein
PGSC0003DMT400087715	Ferredoxin II
PGSC0003DMT400031198	Chloroplast ferredoxin I
PGSC0003DMT400092358	Conserved gene of unknown function
PGSC0003DMT400092568	Gene of unknown function
PGSC0003DMT400088298	Integrase core domain containing protein
PGSC0003DMT400088846	Gene of unknown function
PGSC0003DMT400091970	Gene of unknown function
PGSC0003DMT400095543	Gene of unknown function
PGSC0003DMT400096522	Gene of unknown function
PGSC0003DMT400087107	Gene of unknown function
PGSC0003DMT400084920	Gene of unknown function
PGSC0003DMT400065999	Amino acid binding protein
PGSC0003DMT400059714	Sn-1 protein
PGSC0003DMT400059727	Conserved gene of unknown function
PGSC0003DMT400059715	Sn-2 protein
PGSC0003DMT400059716	Gamma-gliadin
PGSC0003DMT400059720	C2 domain-containing protein
PGSC0003DMT400059724	MLP 34
PGSC0003DMT400091407	Periaxin
PGSC0003DMT400059722	Gamma-gliadin
PGSC0003DMT400090073	TRNA delta(2)-isopentenylpyrophosphate transferase
PGSC0003DMT400092396	F-box protein
PGSC0003DMT400095038	Conserved gene of unknown function
PGSC0003DMT400087082	F-box protein
PGSC0003DMT400087237	Gene of unknown function
PGSC0003DMT400059637	EIN3-binding F-box protein 1
PGSC0003DMT400059640	F-box protein
PGSC0003DMT400085105	Conserved gene of unknown function
PGSC0003DMT400046491	Hcr9-OR2B
PGSC0003DMT400046490	Plant synaptotagmin
PGSC0003DMT400046487	Conserved gene of unknown function
PGSC0003DMT400017029	Hcr9-OR2A
PGSC0003DMT400017032	Disease resistance protein
PGSC0003DMT400017033	Conserved gene of unknown function
PGSC0003DMT400085192	Gene of unknown function
PGSC0003DMT400017052	Gene of unknown function
PGSC0003DMT400017048	Cf-2.1
PGSC0003DMT400094807	Gene of unknown function
PGSC0003DMT400086638	Gene of unknown function
PGSC0003DMT400089263	Gene of unknown function
PGSC0003DMT400069100	Multidomain cyclophilin type peptidyl-prolyl cis-trans isomerase
PGSC0003DMT400006035	Gene of unknown function
PGSC0003DMT400006028	Glucan endo-1,3-beta-glucosidase
PGSC0003DMT400006036	1,3-beta-glucan glucanohydrolase
PGSC0003DMT400006032	Conserved gene of unknown function
PGSC0003DMT400006023	Elicitor-inducible cytochrome P450
PGSC0003DMT400006026	Cytochrome P450
PGSC0003DMT400006034	Cytochrome P450 hydroxylase
PGSC0003DMT400028244	Leucine-rich repeat
PGSC0003DMT400028241	Cc-nbs-lrr resistance protein
PGSC0003DMT400028240	Gene of unknown function
PGSC0003DMT400028238	Gene of unknown function
PGSC0003DMT400028247	GTP-binding protein
PGSC0003DMT400089861	GTP-binding protein
PGSC0003DMT400072117	Disease resistance protein RPS5
PGSC0003DMT400072114	Disease resistance protein RPS2
PGSC0003DMT400080733	Nucleotide binding
PGSC0003DMT400080740	Hcr2-0A
PGSC0003DMT400080757	Hcr2-p5
PGSC0003DMT400080746	Hcr2-p6
PGSC0003DMT400080747	Gene of unknown function
PGSC0003DMT400080748	Hcr2-0B
PGSC0003DMT400080750	Hcr2-p5
PGSC0003DMT400080738	Charged multivesicular body protein 2a
PGSC0003DMT400080758	Gene of unknown function
PGSC0003DMT400080752	Gene of unknown function
PGSC0003DMT400080755	Hcr2-5D
PGSC0003DMT400041341	Amino acid binding protein
PGSC0003DMT400096993	Gene of unknown function
PGSC0003DMT400096985	Gene of unknown function
PGSC0003DMT400041342	Calmodulin
PGSC0003DMT400041343	ATP binding protein
PGSC0003DMT400041338	S-adenosylmethionine decarboxylase proenzyme
PGSC0003DMT400086959	Adenylate isopentenyltransferase 7, mitochondrial
PGSC0003DMT400092662	Gene of unknown function
PGSC0003DMT400090376	Gene of unknown function
PGSC0003DMT400087285	Gene of unknown function
PGSC0003DMT400088522	Gene of unknown function
PGSC0003DMT400082511	Sesquiterpene synthase 2
PGSC0003DMT400025513	Sesquiterpene synthase 2
PGSC0003DMT400075064	Sesquiterpene synthase 2
PGSC0003DMT400075072	Sesquiterpene synthase 2
PGSC0003DMT400075060	Epidermal germacrene C synthase
PGSC0003DMT400075061	Sesquiterpene synthase 1
PGSC0003DMT400095745	Gene of unknown function
PGSC0003DMT400089979	Gene of unknown function
PGSC0003DMT400090600	Gene of unknown function
PGSC0003DMT400089490	Gene of unknown function
PGSC0003DMT400094162	Gene of unknown function
PGSC0003DMT400011419	Gene of unknown function
PGSC0003DMT400059684	Gene of unknown function
PGSC0003DMT400059686	F-box family protein
PGSC0003DMT400095170	Gene of unknown function
PGSC0003DMT400091678	Gene of unknown function
PGSC0003DMT400096338	Gene of unknown function
PGSC0003DMT400095406	Gene of unknown function
PGSC0003DMT400095927	Gene of unknown function
PGSC0003DMT400025250	Hcr2-0A
PGSC0003DMT400090056	Cf-2.2
PGSC0003DMT400025262	Sdl1
PGSC0003DMT400085855	Conserved gene of unknown function
PGSC0003DMT400091532	Leucine-rich repeat resistance protein
PGSC0003DMT400025253	Jasmonic acid-amino acid-conjugating enzyme
PGSC0003DMT400089416	Gene of unknown function
PGSC0003DMT400031323	Conserved gene of unknown function
PGSC0003DMT400031324	Heterogeneous nuclear ribonucleoprotein A3 2
PGSC0003DMT400031329	CycD3
PGSC0003DMT400088701	Gene of unknown function
PGSC0003DMT400086761	Gene of unknown function
PGSC0003DMT400091994	Bifunctional endo-1,4-beta-xylanase xylA
PGSC0003DMT400093883	Gene of unknown function
PGSC0003DMT400089151	Conserved gene of unknown function
PGSC0003DMT400090884	Gene of unknown function
PGSC0003DMT400097599	Gene of unknown function
PGSC0003DMT400095182	Endonuclease/exonuclease/phosphatase
PGSC0003DMT400089770	Late blight resistance protein
PGSC0003DMT400094846	Histone H2A
PGSC0003DMT400094311	Histone H2A
PGSC0003DMT400054216	Conserved gene of unknown function
PGSC0003DMT400053851	Kinase
PGSC0003DMT400053853	UDP-glucose:glucosyltransferase
PGSC0003DMT400053854	Glucosyl/glucuronosyl transferases
PGSC0003DMT400053855	UDP-glucose:glucosyltransferase
PGSC0003DMT400053875	Gene of unknown function
PGSC0003DMT400053866	UDP-glucose:glucosyltransferase
PGSC0003DMT400053870	UDP-glucose:glucosyltransferase
PGSC0003DMT400053872	UDP-glucose:glucosyltransferase
PGSC0003DMT400053859	Conserved gene of unknown function
PGSC0003DMT400053861	Stress-induced receptor-like kinase
PGSC0003DMT400053864	UDP-glucose:glucosyltransferase
PGSC0003DMT400092547	Glucosyl/glucuronosyl transferases
PGSC0003DMT400088887	Histone H2A
PGSC0003DMT400090035	Gene of unknown function
PGSC0003DMT400083022	Gene of unknown function
PGSC0003DMT400084322	Gene of unknown function
PGSC0003DMT400054270	Hcr9-9D
PGSC0003DMT400054259	Hcr9-OR2C
PGSC0003DMT400054260	Hcr9-OR2A
PGSC0003DMT400095647	Gene of unknown function
PGSC0003DMT400097559	LINE-type retrotransposon LIb DNA, complete sequence, Insertion at the S14 site
PGSC0003DMT400074907	UDP-glucose:glucosyltransferase
PGSC0003DMT400091961	UDP-glucose:glucosyltransferase
PGSC0003DMT400074901	Kinase
PGSC0003DMT400074909	UDP-glucose:glucosyltransferase
PGSC0003DMT400074902	Stress-induced receptor-like kinase
PGSC0003DMT400074906	UDP-glucose:glucosyltransferase
PGSC0003DMT400074911	Glucosyl/glucuronosyl transferases
PGSC0003DMT400094621	Gene of unknown function
PGSC0003DMT400093792	UDP-glucose:glucosyltransferase
PGSC0003DMT400022684	Basic 30 kDa endochitinase
PGSC0003DMT400022685	Endochitinase
PGSC0003DMT400093812	Conserved gene of unknown function
PGSC0003DMT400089110	Gene of unknown function
PGSC0003DMT400090068	RRNA intron-encoded homing endonuclease
PGSC0003DMT400085392	Conserved gene of unknown function
PGSC0003DMT400034389	Class II ethylene responsive element binding factor
PGSC0003DMT400092858	Gag-pol polyprotein
PGSC0003DMT400097057	Gene of unknown function
PGSC0003DMT400046367	Cytochrome P450
PGSC0003DMT400046369	F-box family protein
PGSC0003DMT400046372	Gene of unknown function
PGSC0003DMT400046370	Cytochrome P450 hydroxylase
PGSC0003DMT400025499	ELF4
PGSC0003DMT400092818	Gene of unknown function
PGSC0003DMT400041449	Major latex
PGSC0003DMT400041450	Acireductone dioxygenase
PGSC0003DMT400041455	Major latex
PGSC0003DMT400041456	Ribosomal protein L27a
PGSC0003DMT400041446	Major latex
PGSC0003DMT400080987	'chromo' domain containing protein
PGSC0003DMT400080984	Ribosomal RNA methyltransferase
PGSC0003DMT400080988	Polyprotein
PGSC0003DMT400069083	Cytochrome P450
PGSC0003DMT400069084	Splicing factor 3B subunit
PGSC0003DMT400039168	Gene of unknown function
PGSC0003DMT400039169	Gene of unknown function
PGSC0003DMT400039163	Myosin heavy chain, striated muscle
PGSC0003DMT400084746	Integrase core domain containing protein
PGSC0003DMT400038971	Interferon-induced guanylate-binding protein
PGSC0003DMT400093092	Gene of unknown function
PGSC0003DMT400088716	Gag-pol polyprotein
PGSC0003DMT400038995	CBL-interacting protein kinase 16
PGSC0003DMT400039020	Serine-threonine protein kinase, plant-type
PGSC0003DMT400039007	Serine-threonine protein kinase, plant-type
PGSC0003DMT400094516	NB-ARC domain containing protein
PGSC0003DMT400066005	Kinase
PGSC0003DMT400066006	Kinase
PGSC0003DMT400089660	Integrase core domain containing protein
PGSC0003DMT400094780	Integrase core domain containing protein
PGSC0003DMT400096609	Gene of unknown function
PGSC0003DMT400088765	Isopentenyltransferase
PGSC0003DMT400088320	TRNA delta(2)-isopentenylpyrophosphate transferase
PGSC0003DMT400096448	Cytokinin synthase
PGSC0003DMT400091271	Adenylate isopentenyltransferase 7, mitochondrial
PGSC0003DMT400003153	2-oxoglutarate-dependent dioxygenase
PGSC0003DMT400003157	2-oxoglutarate-dependent dioxygenase
PGSC0003DMT400088086	2-oxoglutarate-dependent dioxygenase
PGSC0003DMT400096575	2-oxoglutarate-dependent dioxygenase
PGSC0003DMT400003158	Gibberellin 20 oxidase
PGSC0003DMT400025361	Cytochrome P450 hydroxylase
PGSC0003DMT400025370	Cytochrome P450 71D7
PGSC0003DMT400025354	Cytochrome P450
PGSC0003DMT400025359	Cytochrome P450
PGSC0003DMT400025365	Cytochrome P450 hydroxylase
PGSC0003DMT400025364	Cytochrome P450 hydroxylase
PGSC0003DMT400066066	Duo pollen 1
PGSC0003DMT400006264	42kDa chitin-binding protein
PGSC0003DMT400006266	Gene of unknown function
PGSC0003DMT400077806	Bacterial spot disease resistance protein 4
PGSC0003DMT400077809	Conserved gene of unknown function
PGSC0003DMT400062704	Gene of unknown function
PGSC0003DMT400062718	Nucleotide binding protein
PGSC0003DMT400062706	Hcr2-p3
PGSC0003DMT400062707	Hcr2-2A
PGSC0003DMT400062712	Cf-2.1
PGSC0003DMT400028511	Conserved gene of unknown function
PGSC0003DMT400077884	Conserved gene of unknown function
PGSC0003DMT400077881	Serine-threonine protein kinase, plant-type
PGSC0003DMT400094793	Gene of unknown function
PGSC0003DMT400087227	TPR Domain containing protein
PGSC0003DMT400092401	Conserved gene of unknown function
PGSC0003DMT400093029	Gene of unknown function
PGSC0003DMT400091603	Reverse transcriptase
PGSC0003DMT400086357	Polyprotein protein
PGSC0003DMT400090998	Gene of unknown function
PGSC0003DMT400056812	Retrotransposon protein
PGSC0003DMT400086618	Gag-pol polyprotein
PGSC0003DMT400056811	Major latex
PGSC0003DMT400087451	Conserved gene of unknown function
PGSC0003DMT400014105	Type I MADS box transcription factor
PGSC0003DMT400090410	Type I MADS box transcription factor
PGSC0003DMT400085937	Conserved gene of unknown function
PGSC0003DMT400014107	Type I MADS box transcription factor
PGSC0003DMT400087377	Gene of unknown function
PGSC0003DMT400094683	Gene of unknown function
PGSC0003DMT400097610	Gene of unknown function
PGSC0003DMT400093261	Gene of unknown function
PGSC0003DMT400051570	Conserved gene of unknown function
PGSC0003DMT400051576	Conserved gene of unknown function
PGSC0003DMT400051575	Conserved gene of unknown function
PGSC0003DMT400091210	Gene of unknown function
PGSC0003DMT400006202	Gene of unknown function
PGSC0003DMT400006208	Sn-2 protein
PGSC0003DMT400090804	Gene of unknown function
PGSC0003DMT400062764	NBS-coding resistance gene analog
PGSC0003DMT400062766	Disease resistance protein BS2
PGSC0003DMT400062770	Conserved gene of unknown function
PGSC0003DMT400062773	Exocyst subunit EXO70 A1
PGSC0003DMT400046500	Conserved gene of unknown function
PGSC0003DMT400046497	Disease resistance protein
PGSC0003DMT400046494	NBS-coding resistance gene analog
PGSC0003DMT400097340	AP2/ERF domain-containing transcription factor
PGSC0003DMT400097122	Gene of unknown function
PGSC0003DMT400093725	Mature-parasite-infected erythrocyte surface antigen
PGSC0003DMT400075105	BURP domain-containing protein
PGSC0003DMT400089496	Gene of unknown function
PGSC0003DMT400095290	Calsequestrin
PGSC0003DMT400093455	F-box protein family
PGSC0003DMT400025483	Gene of unknown function
PGSC0003DMT400025478	N-hydroxylating cytochrome P450 CYP79D1
PGSC0003DMT400025480	Cytochrome P450
PGSC0003DMT400083280	Conserved gene of unknown function
PGSC0003DMT400083276	TMV resistance protein N
PGSC0003DMT400083277	NL25
PGSC0003DMT400083274	NL25
PGSC0003DMT400083281	TMV resistance protein N
PGSC0003DMT400093550	Heme/Steroid binding domain
PGSC0003DMT400090575	Protein kinase
PGSC0003DMT400092745	Gene of unknown function
PGSC0003DMT400087206	Gene of unknown function
PGSC0003DMT400095527	Gene of unknown function
PGSC0003DMT400054336	Conserved gene of unknown function
PGSC0003DMT400054334	EMB2421
PGSC0003DMT400082135	Amino acid transporter
PGSC0003DMT400082130	NBS-LRR resistance protein
PGSC0003DMT400082132	Cysteine-rich extensin-2
PGSC0003DMT400086477	Gene of unknown function
PGSC0003DMT400031277	NAC transcription factor
PGSC0003DMT400031266	Gene of unknown function
PGSC0003DMT400031280	Bax inhibitor-1
PGSC0003DMT400031283	Bax inhibitor
PGSC0003DMT400031270	Zinc ion binding protein
PGSC0003DMT400086488	Bax inhibitor
PGSC0003DMT400096061	Gene of unknown function
PGSC0003DMT400031286	Gene of unknown function
PGSC0003DMT400031274	F-box domain-containing protein
PGSC0003DMT400083269	Conserved gene of unknown function
PGSC0003DMT400087682	Gene of unknown function
PGSC0003DMT400088991	Conserved gene of unknown function
PGSC0003DMT400097026	Conserved gene of unknown function
PGSC0003DMT400022704	DNA binding protein
PGSC0003DMT400003243	O-methyltransferase 3
PGSC0003DMT400003239	Orcinol O-methyltransferase
PGSC0003DMT400093564	Zinc knuckle family protein
PGSC0003DMT400086182	Conserved gene of unknown function
PGSC0003DMT400089655	Conserved gene of unknown function
PGSC0003DMT400039129	Defensin protein
PGSC0003DMT400039130	Defensin P322
PGSC0003DMT400036566	2,4-dienoyl-CoA reductase
PGSC0003DMT400036569	2,4-dienoyl-CoA reductase
PGSC0003DMT400090037	Gene of unknown function
PGSC0003DMT400008824	F-Box protein
PGSC0003DMT400008825	F-Box protein
PGSC0003DMT400008826	Atypical receptor-like kinase 1
PGSC0003DMT400008829	Isoform 1 of F-box/LRR-repeat protein
PGSC0003DMT400091336	Gene of unknown function
PGSC0003DMT400039057	Bacterial spot disease resistance protein 4
PGSC0003DMT400096645	Gene of unknown function
PGSC0003DMT400008951	Conserved gene of unknown function
PGSC0003DMT400008946	Plastid fibrillin 2
PGSC0003DMT400039174	Conserved gene of unknown function
PGSC0003DMT400087157	Gene of unknown function
PGSC0003DMT400088444	Ethylene-responsive element binding protein 5
PGSC0003DMT400084899	Glycine-rich protein 2
PGSC0003DMT400062721	AP2/ERF domain-containing transcription factor
PGSC0003DMT400088807	Ethylene-responsive element binding protein 5
PGSC0003DMT400075173	Gene of unknown function
PGSC0003DMT400096946	Retrotransposon gag protein
PGSC0003DMT400085060	Gene of unknown function
PGSC0003DMT400093644	Gene of unknown function
PGSC0003DMT400086627	Gene of unknown function
PGSC0003DMT400094184	Conserved gene of unknown function
PGSC0003DMT400092936	Ubiquitin
PGSC0003DMT400097643	Pectate lyase
PGSC0003DMT400056769	Gene of unknown function
PGSC0003DMT400081502	Auxin response factor 2
PGSC0003DMT400020066	Gene of unknown function
PGSC0003DMT400020068	Developmental protein
PGSC0003DMT400008955	Polygalacturonase
PGSC0003DMT400062810	Hcr2-p8.4
PGSC0003DMT400008966	TNP2-like transposon protein
PGSC0003DMT400054247	NBS-LRR resistance protein
PGSC0003DMT400054250	NBS-LRR resistance protein
PGSC0003DMT400054249	Disease resistance protein RGA2
PGSC0003DMT400089510	Gene of unknown function
PGSC0003DMT400095305	Conserved gene of unknown function
PGSC0003DMT400075155	Gene of unknown function
PGSC0003DMT400085269	Gene of unknown function
PGSC0003DMT400006292	NBS-LRR resistance protein
PGSC0003DMT400006290	Late blight resistance protein Rpi-blb2
PGSC0003DMT400006289	Cysteine-rich extensin-2
PGSC0003DMT400006285	Conserved gene of unknown function
PGSC0003DMT400011589	Late blight resistance protein Rpi-blb2
PGSC0003DMT400046552	Conserved gene of unknown function
PGSC0003DMT400059896	Resistance gene
PGSC0003DMT400069096	Gene of unknown function
PGSC0003DMT400069094	Gene of unknown function
PGSC0003DMT400046446	Serine-threonine protein kinase, plant-type
PGSC0003DMT400046451	Gene of unknown function
PGSC0003DMT400046449	CBL-interacting protein kinase 11
PGSC0003DMT400046447	Gene of unknown function
PGSC0003DMT400088499	Gene of unknown function
PGSC0003DMT400046521	Cytochrome P450
PGSC0003DMT400046522	Cytochrome P450
PGSC0003DMT400046523	Cytochrome P450
PGSC0003DMT400046520	Gene of unknown function
PGSC0003DMT400044144	Cytochrome P450
PGSC0003DMT400036610	Nitrate excretion transporter 6
PGSC0003DMT400036612	Gene of unknown function
PGSC0003DMT400090048	Integrase core domain containing protein
PGSC0003DMT400091965	Cell differentiation protein rcd1
PGSC0003DMT400088270	Conserved gene of unknown function
PGSC0003DMT400028433	Serine-threonine protein kinase, plant-type
PGSC0003DMT400028434	Conserved gene of unknown function
PGSC0003DMT400028435	Serine-threonine protein kinase, plant-type
PGSC0003DMT400028432	Gene of unknown function
PGSC0003DMT400028424	Receptor protein kinase
PGSC0003DMT400028428	Calcineurin-like phosphoesterase family protein
PGSC0003DMT400094557	Gene of unknown function
PGSC0003DMT400090948	Polyprotein
PGSC0003DMT400003234	Electron carrier
PGSC0003DMT400069126	Conserved gene of unknown function
PGSC0003DMT400069125	Conserved gene of unknown function
PGSC0003DMT400087115	Gene of unknown function
PGSC0003DMT400082776	Gene of unknown function
PGSC0003DMT400085878	Gene of unknown function
PGSC0003DMT400096595	Polyprotein protein
PGSC0003DMT400003261	Conserved gene of unknown function
PGSC0003DMT400086687	Endonuclease/exonuclease/phosphatase
PGSC0003DMT400036571	Conserved gene of unknown function
PGSC0003DMT400036574	Actin binding protein
PGSC0003DMT400096605	3-5 exonuclease
PGSC0003DMT400039098	Progesterone 5 beta-reductase
PGSC0003DMT400039105	Ulp1 protease family, C-terminal catalytic domain containing protein
PGSC0003DMT400088423	Gene of unknown function
PGSC0003DMT400089693	Gene of unknown function
PGSC0003DMT400025432	Disease resistance protein BS2
PGSC0003DMT400025437	RGC1
PGSC0003DMT400025440	Resistance protein PSH-RGH6
PGSC0003DMT400025441	Disease resistance protein
PGSC0003DMT400092661	UDP-glucose:glucosyltransferase
PGSC0003DMT400041422	Glucosyl/glucuronosyl transferases
PGSC0003DMT400041419	Conserved gene of unknown function
PGSC0003DMT400041420	UDP-glucose:glucosyltransferase
PGSC0003DMT400041426	Conserved gene of unknown function
PGSC0003DMT400077872	Glycosyl hydrolase family 17 protein
PGSC0003DMT400080895	Conserved gene of unknown function
PGSC0003DMT400081485	Metallocarboxypeptidase inhibitor
PGSC0003DMT400081484	Conserved gene of unknown function
PGSC0003DMT400014262	UV-induced sesquiterpene cyclase
PGSC0003DMT400069066	Embryo-abundant protein
PGSC0003DMT400069065	Conserved gene of unknown function
PGSC0003DMT400090129	Embryo-abundant protein
PGSC0003DMT400006323	CYP76J1
PGSC0003DMT400006318	Geraniol 10-hydroxylase
PGSC0003DMT400006321	Pentatricopeptide repeat-containing protein, mitochondrial
PGSC0003DMT400096037	Gene of unknown function
PGSC0003DMT400090456	Isopentenyltransferase
PGSC0003DMT400066095	Gene of unknown function
PGSC0003DMT400086732	TNP2-like transposon protein
PGSC0003DMT400044148	Blight resistance protein T118
PGSC0003DMT400075151	Metalloendoproteinase 1
PGSC0003DMT400089474	Gene of unknown function
PGSC0003DMT400069131	Poly(A) polymerase
PGSC0003DMT400069134	Gene of unknown function
PGSC0003DMT400069135	Gene of unknown function
PGSC0003DMT400011552	Conserved gene of unknown function
PGSC0003DMT400011555	Conserved gene of unknown function
PGSC0003DMT400011560	Conserved gene of unknown function
PGSC0003DMT400080856	Cysteine-rich, acidic integral membrane protein, putatative,
PGSC0003DMT400091802	Matrix metalloprotease 1
PGSC0003DMT400096452	Matrix metalloprotease 1
PGSC0003DMT400091859	Late blight resistance protein
PGSC0003DMT400025502	Glucose-6-phosphate isomerase
PGSC0003DMT400093625	Restricted tev movement 1
PGSC0003DMT400092165	Restricted tev movement 1
PGSC0003DMT400008870	Disease resistance protein
PGSC0003DMT400008875	Undecaprenyl pyrophosphate synthetase
PGSC0003DMT400034402	Gene of unknown function
PGSC0003DMT400034407	Cytochrome P450
PGSC0003DMT400090678	Oxidoreductase
PGSC0003DMT400093881	Gag-pol polyprotein
PGSC0003DMT400083511	Histone acetyltransferase type B catalytic subunit
PGSC0003DMT400083495	Gene of unknown function
PGSC0003DMT400094185	Gene of unknown function
PGSC0003DMT400084927	Conserved gene of unknown function
PGSC0003DMT400087916	Ubiquitin-protein ligase
PGSC0003DMT400082766	Gene of unknown function
PGSC0003DMT400014280	NBS-LRR resistance protein
PGSC0003DMT400014277	Formin 14
PGSC0003DMT400036605	Glutamine synthetase
PGSC0003DMT400086166	RRNA intron-encoded homing endonuclease
PGSC0003DMT400049141	DNA repair protein XRCC2 homolog
PGSC0003DMT400049142	Photosystem II 5 kDa protein, chloroplast
PGSC0003DMT400049145	Gene of unknown function
PGSC0003DMT400095079	Conserved gene of unknown function
PGSC0003DMT400092341	Gene of unknown function
PGSC0003DMT400049120	OJ1485_B09.11 protein
PGSC0003DMT400082411	Sn-2 protein
PGSC0003DMT400075167	Conserved gene of unknown function
PGSC0003DMT400075171	Conserved gene of unknown function
PGSC0003DMT400097524	Gene of unknown function
PGSC0003DMT400090692	Gene of unknown function
PGSC0003DMT400092244	F-box protein
PGSC0003DMT400093789	Gene of unknown function
PGSC0003DMT400075177	Protein kinase
PGSC0003DMT400087280	Actin-depolymerizing factor 2
PGSC0003DMT400091839	Gene of unknown function
PGSC0003DMT400028489	Latency-associated nuclear antigen
PGSC0003DMT400091323	Isopentenyltransferase
PGSC0003DMT400096814	GTP-binding protein
PGSC0003DMT400031511	Receptor kinase
PGSC0003DMT400031518	Receptor kinase
PGSC0003DMT400031514	Gene of unknown function
PGSC0003DMT400031515	Receptor kinase
PGSC0003DMT400031503	Conserved gene of unknown function
PGSC0003DMT400093957	Isopentenyltransferase
PGSC0003DMT400020051	ARF GTPase activator
PGSC0003DMT400020053	Bet v I allergen family protein
PGSC0003DMT400044153	Gibberellin 3-oxidase
PGSC0003DMT400022721	Major latex
PGSC0003DMT400051525	Conserved gene of unknown function
PGSC0003DMT400028494	Hcr2-0A
PGSC0003DMT400080907	Extensin (ext)
PGSC0003DMT400003249	NBS-LRR root-knot nematode resistance protein
PGSC0003DMT400087059	Conserved gene of unknown function
PGSC0003DMT400086655	Gene of unknown function
PGSC0003DMT400011488	Reverse transcriptase
PGSC0003DMT400090908	Isopentenyltransferase
PGSC0003DMT400086264	ATP binding protein
PGSC0003DMT400086561	Isopentenyltransferase
PGSC0003DMT400096524	Isopentenyltransferase
PGSC0003DMT400049147	TRANSPARENT TESTA 12 protein
PGSC0003DMT400008964	Gene of unknown function
PGSC0003DMT400006277	Conserved gene of unknown function
PGSC0003DMT400088950	Isopentenyltransferase
PGSC0003DMT400041558	Binding protein
PGSC0003DMT400039115	BZIP transcription factor bZIP109
PGSC0003DMT400094256	Conserved gene of unknown function
PGSC0003DMT400039120	Gene of unknown function
PGSC0003DMT400039121	Gene of unknown function
PGSC0003DMT400083306	WRKY transcription factor
PGSC0003DMT400086647	Gene of unknown function
PGSC0003DMT400087681	Gene of unknown function
PGSC0003DMT400088977	Gene of unknown function
PGSC0003DMT400049150	Zinc binding dehydrogenase
PGSC0003DMT400093636	Gene of unknown function
PGSC0003DMT400077774	Methylcobalamin:com methyltransferase
PGSC0003DMT400092830	ATP binding protein
PGSC0003DMT400097535	Adenylate isopentenyltransferase 7, mitochondrial
PGSC0003DMT400097110	ATP binding protein
PGSC0003DMT400020065	Sn-1 protein
PGSC0003DMT400020062	Sn-1 protein
PGSC0003DMT400020063	Sn-1 protein
PGSC0003DMT400084770	Gag-pol protein
PGSC0003DMT400085699	Gene of unknown function
PGSC0003DMT400046529	Transcription factor
PGSC0003DMT400088259	Elongation factor 1-alpha
PGSC0003DMT400090797	Integrase core domain containing protein
PGSC0003DMT400085991	Gene of unknown function
PGSC0003DMT400080981	Conserved gene of unknown function
PGSC0003DMT400080982	Glycine-rich protein
PGSC0003DMT400006339	Gene of unknown function
PGSC0003DMT400049097	Conserved gene of unknown function
PGSC0003DMT400049092	Mutt domain protein
PGSC0003DMT400096883	Gene of unknown function
PGSC0003DMT400091815	Gene of unknown function
PGSC0003DMT400059860	Conserved gene of unknown function
PGSC0003DMT400059863	Gag/pol polyprotein
PGSC0003DMT400041521	Phosphoenolpyruvate carboxykinase
PGSC0003DMT400041528	Anthocyanin acyltransferase
PGSC0003DMT400083498	Sn-1 protein
PGSC0003DMT400006334	Gene of unknown function
PGSC0003DMT400006336	NBS-LRR resistance protein
PGSC0003DMT400097662	Calmodulin-3
PGSC0003DMT400044158	Major latex
PGSC0003DMT400075166	Conserved gene of unknown function
PGSC0003DMT400097140	Conserved gene of unknown function
PGSC0003DMT400092704	Serine-threonine protein kinase, plant-type
PGSC0003DMT400054227	Conserved gene of unknown function
PGSC0003DMT400054229	NB-ARC domain containing protein
PGSC0003DMT400072165	Cc-nbs-lrr resistance protein
PGSC0003DMT400054318	Potassium channel KLT1
PGSC0003DMT400054316	Gene of unknown function
PGSC0003DMT400054298	Hcr9-Avr9-hir2
PGSC0003DMT400054299	Calmodulin
PGSC0003DMT400097536	Conserved gene of unknown function
PGSC0003DMT400084794	Conserved gene of unknown function
PGSC0003DMT400011571	Conserved gene of unknown function
PGSC0003DMT400094551	Gene of unknown function
PGSC0003DMT400011590	Gene of unknown function
PGSC0003DMT400095024	Gene of unknown function
PGSC0003DMT400089361	Ethylene-responsive transcription factor ERF070
PGSC0003DMT400051586	Histidine decarboxylase
PGSC0003DMT400080894	RNase Phy3
PGSC0003DMT400022705	Protein kinase
PGSC0003DMT400017300	Auxin efflux carrier component
PGSC0003DMT400017301	Auxin efflux carrier component
PGSC0003DMT400085928	Gene of unknown function
PGSC0003DMT400090399	Disease resistance protein RGA1
PGSC0003DMT400046505	Disease resistance protein RGA1
PGSC0003DMT400046503	Serine-threonine protein kinase, plant-type
PGSC0003DMT400089586	Gene of unknown function
PGSC0003DMT400011524	Inosine-uridine preferring nucleoside hydrolase
PGSC0003DMT400011533	Gene of unknown function
PGSC0003DMT400011526	Inosine-uridine preferring nucleoside hydrolase
PGSC0003DMT400082816	Gene of unknown function
PGSC0003DMT400046543	Gene of unknown function
PGSC0003DMT400046545	Gene of unknown function
PGSC0003DMT400075158	Conserved gene of unknown function
PGSC0003DMT400075159	O-methyltransferase
PGSC0003DMT400093489	Gene of unknown function
PGSC0003DMT400077823	Nuclear pore complex protein nup93
PGSC0003DMT400077824	Nuclear pore complex protein nup93
PGSC0003DMT400082767	Gene of unknown function
PGSC0003DMT400082143	Conserved gene of unknown function
PGSC0003DMT400095520	Gene of unknown function
PGSC0003DMT400083502	Gene of unknown function
PGSC0003DMT400082509	Gene of unknown function
PGSC0003DMT400082510	Gene of unknown function
PGSC0003DMT400054276	Conserved gene of unknown function
PGSC0003DMT400054280	Cytochrome P450
PGSC0003DMT400054278	Cytochrome P450
PGSC0003DMT400054285	Conserved gene of unknown function
PGSC0003DMT400094731	Gene of unknown function
PGSC0003DMT400087085	Isopentenyltransferase
PGSC0003DMT400095385	ATP binding protein
PGSC0003DMT400075164	P-coumaroyl quinate/shikimate 3'-hydroxylase
PGSC0003DMT400088851	Adenylate isopentenyltransferase 5, chloroplastic
PGSC0003DMT400093361	ATP binding protein
PGSC0003DMT400044120	Cytochrome P450
PGSC0003DMT400044122	Cytochrome P450
PGSC0003DMT400044123	Cytochrome P450
PGSC0003DMT400083524	Helicase
PGSC0003DMT400083523	Helicase
PGSC0003DMT400089814	Gene of unknown function
PGSC0003DMT400054333	Hydroxyproline-rich glycoprotein
PGSC0003DMT400008981	Vacuolar protein sorting protein
PGSC0003DMT400096638	F-box family protein
PGSC0003DMT400090520	Gene of unknown function
PGSC0003DMT400017286	Cold-induced glucosyl transferase
PGSC0003DMT400017287	Gene of unknown function
PGSC0003DMT400083953	Conserved gene of unknown function
PGSC0003DMT400083954	Gene of unknown function
PGSC0003DMT400084327	Gene of unknown function
PGSC0003DMT400051592	MtN19
PGSC0003DMT400051594	Succinate/fumarate mitochondrial transporter
PGSC0003DMT400097009	Cc-nbs-lrr resistance protein
PGSC0003DMT400028436	Disease resistance protein RPS5
PGSC0003DMT400028446	Conserved gene of unknown function
PGSC0003DMT400028447	Gene of unknown function
PGSC0003DMT400069137	3-hydroxyisobutyryl-CoA hydrolase 5
PGSC0003DMT400066086	Salicylic acid-binding protein 2
PGSC0003DMT400083289	Gene of unknown function
PGSC0003DMT400081501	Sn-1 protein
PGSC0003DMT400006328	Conserved gene of unknown function
PGSC0003DMT400014272	Vetispiradiene synthase 5
PGSC0003DMT400083308	Non-LTR retroelement reverse transcriptase
PGSC0003DMT400083309	Conserved gene of unknown function
PGSC0003DMT400083512	Gene of unknown function
PGSC0003DMT400084513	Conserved gene of unknown function
PGSC0003DMT400051605	Pentatricopeptide repeat-containing protein
PGSC0003DMT400088933	ATP binding protein
PGSC0003DMT400096350	Gene of unknown function
PGSC0003DMT400094647	Gene of unknown function
PGSC0003DMT400080972	Gene of unknown function
PGSC0003DMT400097096	MYB transcription factor MYB70
PGSC0003DMT400080900	NB-ARC domain containing protein
PGSC0003DMT400082139	Gene of unknown function
PGSC0003DMT400003247	Conserved gene of unknown function
PGSC0003DMT400056840	Pentatricopeptide repeat-containing protein
PGSC0003DMT400056841	DNA binding protein
PGSC0003DMT400095919	Integrase core domain containing protein
PGSC0003DMT400034395	Osmotin
PGSC0003DMT400084520	Gene of unknown function
PGSC0003DMT400091594	Integrase core domain containing protein
PGSC0003DMT400091245	Gene of unknown function
PGSC0003DMT400086198	Cytochrome P450
PGSC0003DMT400046540	Fringe
PGSC0003DMT400093728	Conserved gene of unknown function
PGSC0003DMT400084910	Gene of unknown function
PGSC0003DMT400069120	GI11736
PGSC0003DMT400025493	Receptor kinase
PGSC0003DMT400025497	Ubiquitin carrier protein
PGSC0003DMT400020091	Pto-like serine/threonine kinase
PGSC0003DMT400092805	Integrase core domain containing protein
PGSC0003DMT400087246	Subtilisin-like protease
PGSC0003DMT400044145	Gene of unknown function
PGSC0003DMT400022698	Chlorophyll a/b binding protein
PGSC0003DMT400028509	RING-H2 finger protein ATL3K
PGSC0003DMT400034410	Calcium ion binding protein
PGSC0003DMT400082136	Ve resistance gene
PGSC0003DMT400096781	Isopentenyltransferase
PGSC0003DMT400077878	Conserved gene of unknown function
PGSC0003DMT400056834	Peptide transporter
PGSC0003DMT400084487	Dehydrin DH2a
PGSC0003DMT400084529	NBS-LRR resistance protein
PGSC0003DMT400062826	Autoinhibited calcium ATPase
PGSC0003DMT400049125	UDP-glucose:glucosyltransferase
PGSC0003DMT400097049	Gene of unknown function
PGSC0003DMT400097593	Conserved gene of unknown function
PGSC0003DMT400056847	Aspartic proteinase nepenthesin-1
PGSC0003DMT400059923	NRAMP2
PGSC0003DMT400051595	Receptor protein kinase
PGSC0003DMT400084510	ATRAD3
PGSC0003DMT400085265	Conserved gene of unknown function
PGSC0003DMT400097162	Mads box protein
PGSC0003DMT400034374	Gene of unknown function
PGSC0003DMT400034375	Transferase, transferring glycosyl groups
PGSC0003DMT400020094	Alpha-1,4 glucan phosphorylase L-1 isozyme, chloroplastic/amyloplastic
PGSC0003DMT400081717	Conserved gene of unknown function
PGSC0003DMT400084187	Gene of unknown function
PGSC0003DMT400049127	Disease resistance protein RPS2
PGSC0003DMT400049152	Heat shock protein 70 (HSP70)-interacting protein
PGSC0003DMT400093105	Gene of unknown function
PGSC0003DMT400006331	Conserved gene of unknown function
PGSC0003DMT400085796	Conserved gene of unknown function
PGSC0003DMT400028521	Cytochrome P450
PGSC0003DMT400075138	Conserved gene of unknown function
PGSC0003DMT400031550	Class S F-box protein
PGSC0003DMT400008972	Protein ASYMMETRIC LEAVES2
PGSC0003DMT400008919	Gene of unknown function
PGSC0003DMT400008921	Gene of unknown function
PGSC0003DMT400081534	Gene of unknown function
PGSC0003DMT400014284	Glucose-6-phosphate/phosphate translocator 1, chloroplast
PGSC0003DMT400059922	DNA binding protein
PGSC0003DMT400006326	Glutamate decarboxylase 4a
PGSC0003DMT400011592	UDP-glucosyltransferase
PGSC0003DMT400059919	Conserved gene of unknown function
PGSC0003DMT400085394	Gene of unknown function
PGSC0003DMT400085062	Gene of unknown function
PGSC0003DMT400056835	Conserved gene of unknown function
PGSC0003DMT400011574	Kinase
PGSC0003DMT400087664	UDP-glucose:glucosyltransferase
PGSC0003DMT400017291	CDPK adapter protein 1
PGSC0003DMT400090935	Gene of unknown function
PGSC0003DMT400082703	Conserved gene of unknown function
PGSC0003DMT400081715	Dehydrodolichyl diphosphate synthase 2
PGSC0003DMT400096405	Isopentenyltransferase
PGSC0003DMT400017296	NBS-LRR resistance protein
PGSC0003DMT400083467	Reverse transcriptase
PGSC0003DMT400086521	Gene of unknown function
PGSC0003DMT400086145	Gene of unknown function
PGSC0003DMT400031543	60S ribosomal protein L35a
PGSC0003DMT400081178	UPF0308 protein, chloroplastic
PGSC0003DMT400031549	Gene of unknown function
PGSC0003DMT400077913	RNase H family protein
PGSC0003DMT400083723	Ubiquitin-protein ligase
PGSC0003DMT400082347	Glossy1 protein
PGSC0003DMT400092947	Gene of unknown function
PGSC0003DMT400091502	Gene of unknown function
PGSC0003DMT400083315	Actin binding protein
PGSC0003DMT400046539	EIN3
PGSC0003DMT400028517	Allyl alcohol dehydrogenase
PGSC0003DMT400025519	F-box domain containing protein
PGSC0003DMT400039161	GTP-binding protein
PGSC0003DMT400091941	Gene of unknown function
PGSC0003DMT400082141	Myosin heavy chain, striated muscle
PGSC0003DMT400082345	Phytochelatin synthase
PGSC0003DMT400082702	Protein COBRA
PGSC0003DMT400006337	Alpha-1,4 glucan phosphorylase L-1 isozyme, chloroplastic/amyloplastic
PGSC0003DMT400082699	MTN3 homolog
PGSC0003DMT400014261	Ubiquitin carrier protein
PGSC0003DMT400081515	Gene of unknown function
PGSC0003DMT400081518	Gene of unknown function
PGSC0003DMT400081177	Gene of unknown function
PGSC0003DMT400093149	Gene of unknown function
PGSC0003DMT400094150	Gene of unknown function
PGSC0003DMT400031553	HSP transcription factor
PGSC0003DMT400084715	Cellulose synthase
PGSC0003DMT400084485	Gene of unknown function
PGSC0003DMT400083282	Gene of unknown function
PGSC0003DMT400083286	Gene of unknown function
PGSC0003DMT400077907	Multidrug resistance pump
PGSC0003DMT400062811	Resistance gene
PGSC0003DMT400022709	Conserved gene of unknown function
PGSC0003DMT400003250	Glutamate decarboxylase isozyme 3
PGSC0003DMT400082820	Gene of unknown function
PGSC0003DMT400028504	Ubiquitin-protein ligase
PGSC0003DMT400008970	Alpha-1,4 glucan phosphorylase L-1 isozyme, chloroplastic/amyloplastic
PGSC0003DMT400081509	Conserved gene of unknown function
PGSC0003DMT400083465	Gene of unknown function
PGSC0003DMT400083464	Gene of unknown function
PGSC0003DMT400081176	Gene of unknown function
PGSC0003DMT400081714	Cell division protease ftsH
PGSC0003DMT400083014	RNA-binding gricine-rich protein-1c
PGSC0003DMT400082343	Gene of unknown function
PGSC0003DMT400081173	26S protease regulatory subunit S10b
PGSC0003DMT400084710	Oligopeptide transporter
PGSC0003DMT400081713	Conserved gene of unknown function
PGSC0003DMT400080999	Gene of unknown function
PGSC0003DMT400084179	Gene of unknown function
PGSC0003DMT400082342	Lipid binding protein
PGSC0003DMT400081529	Gene of unknown function
PGSC0003DMT400081530	Gene of unknown function
PGSC0003DMT400082341	Gene of unknown function
PGSC0003DMT400082779	12-oxophytodienoate reductase 1
PGSC0003DMT400082340	Gene of unknown function
PGSC0003DMT400083010	RNA recognition motif-containing protein
PGSC0003DMT400084335	DEAD-box ATP-dependent RNA helicase 40
PGSC0003DMT400083718	NBS-LRR resistance protein
PGSC0003DMT400084022	Conserved gene of unknown function
PGSC0003DMT400081168	Gene of unknown function
PGSC0003DMT400082338	DNA binding protein
PGSC0003DMT400082826	Gene of unknown function
PGSC0003DMT400082337	P-coumaroyl quinate/shikimate 3'-hydroxylase
PGSC0003DMT400084177	Gene of unknown function
PGSC0003DMT400082336	Anthocyanin permease
PGSC0003DMT400081483	Gene of unknown function
PGSC0003DMT400084708	Gene of unknown function
PGSC0003DMT400084175	Starch phosphorylase L
PGSC0003DMT400083714	Regulator of telomere elongation helicase 1 rtel1
PGSC0003DMT400081004	Vetispiradiene synthase
PGSC0003DMT400081003	Phytochelatin synthetase
PGSC0003DMT400081533	Cytochrome P450
PGSC0003DMT400083712	Conserved gene of unknown function
PGSC0003DMT400084480	Gene of unknown function
PGSC0003DMT400082693	Spotted leaf protein
PGSC0003DMT400081531	Gene of unknown function
PGSC0003DMT400084479	Conserved gene of unknown function
PGSC0003DMT400084168	Ppx-GppA phosphatase protein (Exopolyphosphatase)
PGSC0003DMT400084478	Conserved gene of unknown function
PGSC0003DMT400081162	Cyclin-dependent protein kinase
PGSC0003DMT400081159	Short chain alcohol dehydrogenase
PGSC0003DMT400084331	Gene of unknown function
PGSC0003DMT400084164	Gene of unknown function
PGSC0003DMT400082520	Integrase
PGSC0003DMT400083458	Gene of unknown function
PGSC0003DMT400084705	Low-level beta-amylase 1
PGSC0003DMT400081522	Nectarin-1
PGSC0003DMT400082996	Inosine-uridine preferring nucleoside hydrolase
PGSC0003DMT400082137	Xyloglucan specific endoglucanase inhibitor
PGSC0003DMT400081158	Flavonol synthase/flavanone 3-hydroxylase
PGSC0003DMT400081157	Cyclic nucleotide-gated ion channel
PGSC0003DMT400080990	Translocation transactivator/inclusion body protein
PGSC0003DMT400081707	Gene of unknown function
PGSC0003DMT400081155	Conserved gene of unknown function
PGSC0003DMT400083452	Cdc27B
PGSC0003DMT400082330	Gene of unknown function
PGSC0003DMT400083709	GTP binding protein
PGSC0003DMT400082328	Conserved gene of unknown function
PGSC0003DMT400083451	HJTR2GH1 protein
PGSC0003DMT400081147	Cembratrienol synthase 2a
PGSC0003DMT400084699	26S proteasome AAA-ATPase subunit RPT4a
PGSC0003DMT400084698	Gene of unknown function
PGSC0003DMT400084471	Mitochondrial phosphate translocator
PGSC0003DMT400083449	Avr9/Cf-9 rapidly elicited protein 180
PGSC0003DMT400081146	Gene of unknown function
PGSC0003DMT400082327	ATRAD3
PGSC0003DMT400084697	26S proteasome AAA-ATPase subunit RPT4a
PGSC0003DMT400081499	Gene of unknown function
PGSC0003DMT400080992	Sesquiterpene synthase 2
PGSC0003DMT400084469	Syntaxin
PGSC0003DMT400084149	Rac-GTP binding protein
PGSC0003DMT400082322	CYP82E5
PGSC0003DMT400081141	Gene of unknown function
PGSC0003DMT400082321	Phosphoglycerate mutase
PGSC0003DMT400082988	Gene of unknown function
PGSC0003DMT400081538	Integrase core domain containing protein
PGSC0003DMT400082686	Glycosyltransferase
PGSC0003DMT400081696	DNA binding protein
PGSC0003DMT400083703	Glucosyltransferase
PGSC0003DMT400081139	Tetratricoredoxin
PGSC0003DMT400083700	Gene of unknown function
PGSC0003DMT400084688	Monoterpene synthase 2
PGSC0003DMT400083437	Potassium transporter
PGSC0003DMT400083434	Gene of unknown function
PGSC0003DMT400082987	Conserved gene of unknown function
PGSC0003DMT400083698	Conserved gene of unknown function
PGSC0003DMT400083433	Gene of unknown function
PGSC0003DMT400084684	Flavonol synthase/flavanone 3-hydroxylase
PGSC0003DMT400081685	Conserved gene of unknown function
PGSC0003DMT400084141	Gene of unknown function
PGSC0003DMT400081136	Cytochrome P450 hydroxylase
PGSC0003DMT400084683	Phosphatidylinositol n-acetylglucosaminyltransferase subunit p
PGSC0003DMT400081135	Conserved gene of unknown function
PGSC0003DMT400082676	Gene of unknown function
PGSC0003DMT400082672	Gene of unknown function
PGSC0003DMT400081680	Protein transporter
PGSC0003DMT400084458	Conserved gene of unknown function
PGSC0003DMT400082307	Reverse transcriptase
PGSC0003DMT400084137	Gene of unknown function
PGSC0003DMT400083686	Gene of unknown function
MSTRG.1.1	.
MSTRG.1.2	.
MSTRG.1.3	.
MSTRG.1.4	.
MSTRG.2.1	.
PGSC0003DMT400039136	Defensin
PGSC0003DMT400039134	Defensin J1-2
PGSC0003DMT400058594	Glutamate decarboxylase isoform3
MSTRG.4.1	.
MSTRG.5.1	.
PGSC0003DMT400058700	Gene of unknown function
PGSC0003DMT400058653	Plasmalemma Na+/H+ antiporter
MSTRG.7.2	.
MSTRG.7.3	.
MSTRG.8.1	.
MSTRG.8.2	.
PGSC0003DMT400058600	Protein kinase
MSTRG.8.4	.
PGSC0003DMT400058603	Transmembrane transporter
PGSC0003DMT400058607	UPF0497 membrane protein PIMP1
MSTRG.9.1	.
MSTRG.9.2	.
PGSC0003DMT400058657	Conserved gene of unknown function
PGSC0003DMT400058608	Clathrin assembly protein
MSTRG.10.1	.
PGSC0003DMT400058659	PLE
MSTRG.10.3	.
PGSC0003DMT400058661	Type I inositol polyphosphate 5-phosphatase
MSTRG.11.1	.
PGSC0003DMT400058668	Oxidoreductase
MSTRG.11.3	.
MSTRG.11.4	.
PGSC0003DMT400058612	UDP-glucose flavonoid 3-O-glucosyltransferase
MSTRG.12.1	.
PGSC0003DMT400058609	Dolichol-phosphate mannosyltransferase
PGSC0003DMT400058670	Xyloglucan endotransglucosylase/hydrolase 13
MSTRG.13.2	.
MSTRG.14.1	.
PGSC0003DMT400058615	ZFP4 (ZINC FINGER PROTEIN 4)
MSTRG.14.3	.
MSTRG.15.1	.
PGSC0003DMT400058616	Protein OBERON 3
MSTRG.15.2	.
MSTRG.15.4	.
PGSC0003DMT400058619	CONSTANS interacting protein 6
PGSC0003DMT400058673	Cytochrome B561
PGSC0003DMT400058674	Cytochrome
PGSC0003DMT400058701	Cytochrome B561
PGSC0003DMT400058621	CMPG1b
PGSC0003DMT400092428	Clathrin assembly protein
PGSC0003DMT400058675	Conserved gene of unknown function
PGSC0003DMT400058622	Zinc finger protein
PGSC0003DMT400058625	Conserved gene of unknown function
PGSC0003DMT400058627	Alpha,alpha-trehalose-phosphate synthase [UDP-forming] 6
MSTRG.22.2	.
PGSC0003DMT400058629	Conserved gene of unknown function
PGSC0003DMT400058630	Conserved gene of unknown function
PGSC0003DMT400058631	Conserved gene of unknown function
PGSC0003DMT400058632	Conserved gene of unknown function
MSTRG.26.1	.
PGSC0003DMT400058676	Loganic acid methyltransferase
PGSC0003DMT400058635	Aspartokinase
MSTRG.27.2	.
MSTRG.28.1	.
PGSC0003DMT400058680	Aspartate-semialdehyde dehydrogenase
PGSC0003DMT400058639	SEC14 cytosolic factor / phosphoglyceride transfer family protein
MSTRG.30.1	.
PGSC0003DMT400058685	Aspartate semialdehyde dehydrogenase
MSTRG.30.3	.
MSTRG.30.4	.
MSTRG.30.5	.
MSTRG.30.6	.
MSTRG.30.7	.
PGSC0003DMT400058682	SEC14 cytosolic factor / phosphoglyceride transfer family protein
PGSC0003DMT400058681	SEC14 cytosolic factor / phosphoglyceride transfer family protein
MSTRG.31.1	.
PGSC0003DMT400058642	Resistance protein PSH-RGH6
MSTRG.31.3	.
MSTRG.31.5	.
MSTRG.31.4	.
MSTRG.31.6	.
MSTRG.31.7	.
MSTRG.31.8	.
MSTRG.31.9	.
PGSC0003DMT400058643	Disease resistance protein
MSTRG.33.1	.
MSTRG.31.10	.
MSTRG.31.11	.
MSTRG.34.1	.
PGSC0003DMT400058647	Resistance protein PSH-RGH6
MSTRG.31.13	.
PGSC0003DMT400051415	RGC1
MSTRG.35.1	.
PGSC0003DMT400051416	Circadian clock-associated FKF1
PGSC0003DMT400051417	Dynamin
PGSC0003DMT400051424	Oxidoreductase
PGSC0003DMT400051425	Myosin heavy chain, clone
PGSC0003DMT400051426	Ankyrin repeat-containing protein
MSTRG.39.2	.
MSTRG.40.1	.
PGSC0003DMT400084010	Gene of unknown function
MSTRG.42.1	.
MSTRG.43.1	.
PGSC0003DMT400089371	Gene of unknown function
PGSC0003DMT400077766	Conserved gene of unknown function
PGSC0003DMT400077768	Conserved gene of unknown function
PGSC0003DMT400077762	Conserved gene of unknown function
PGSC0003DMT400080885	Loganic acid methyltransferase
PGSC0003DMT400025183	Conserved gene of unknown function
PGSC0003DMT400025165	Conserved gene of unknown function
PGSC0003DMT400025180	Conserved gene of unknown function
PGSC0003DMT400025179	Conserved gene of unknown function
PGSC0003DMT400025178	Calcium-binding pollen allergen
PGSC0003DMT400025176	SET domain containing protein
MSTRG.46.3	.
MSTRG.46.2	.
PGSC0003DMT400025172	Nudix hydrolase 17, mitochondrial
PGSC0003DMT400025166	Calcium ion binding protein
MSTRG.48.1	.
PGSC0003DMT400025169	Calcium ion binding protein
PGSC0003DMT400025186	Conserved gene of unknown function
MSTRG.51.1	.
PGSC0003DMT400080975	Gene of unknown function
PGSC0003DMT400080976	Conserved gene of unknown function
PGSC0003DMT400081775	CDC48-interacting UBX-domain protein
MSTRG.54.1	.
PGSC0003DMT400081778	Jasmonate ZIM-domain protein 3
MSTRG.54.3	.
MSTRG.54.4	.
PGSC0003DMT400081915	Gene of unknown function
PGSC0003DMT400081916	F-box protein family
PGSC0003DMT400081918	Dynein light chain type 1 family protein
PGSC0003DMT400081921	Conserved gene of unknown function
PGSC0003DMT400081782	Isoform 2 of UPF0496 protein
MSTRG.59.1	.
MSTRG.59.3	.
MSTRG.59.4	.
MSTRG.59.5	.
PGSC0003DMT400081929	Iaa-amino acid hydrolase 4
MSTRG.60.2	.
MSTRG.60.3	.
MSTRG.60.4	.
MSTRG.60.7	.
MSTRG.60.5	.
MSTRG.60.6	.
MSTRG.60.8	.
MSTRG.60.9	.
PGSC0003DMT400081926	Iaa-amino acid hydrolase 4
MSTRG.60.11	.
MSTRG.60.12	.
MSTRG.60.13	.
PGSC0003DMT400081934	Short chain alcohol dehydrogenase
PGSC0003DMT400081936	Short chain alcohol dehydrogenase
PGSC0003DMT400081937	Short chain alcohol dehydrogenase
PGSC0003DMT400081785	Short chain alcohol dehydrogenase
PGSC0003DMT400082031	Ntp201
PGSC0003DMT400081787	Binding protein
MSTRG.63.2	.
PGSC0003DMT400081938	Gene of unknown function
PGSC0003DMT400081939	Conserved gene of unknown function
PGSC0003DMT400081942	Lysyl-tRNA synthetase
MSTRG.66.2	.
MSTRG.66.3	.
MSTRG.67.1	.
PGSC0003DMT400081788	Conserved gene of unknown function
PGSC0003DMT400081790	Isocitrate dehydrogenase [NADP]
PGSC0003DMT400081943	Conserved gene of unknown function
MSTRG.69.4	.
MSTRG.69.2	.
MSTRG.69.5	.
MSTRG.69.3	.
MSTRG.69.6	.
MSTRG.69.7	.
MSTRG.69.8	.
MSTRG.69.9	.
MSTRG.69.10	.
PGSC0003DMT400082032	Conserved gene of unknown function
PGSC0003DMT400081950	5'-adenylylsulfate reductase-like 5
PGSC0003DMT400081953	Oxoglutarate malate translocator
MSTRG.73.1	.
MSTRG.73.2	.
MSTRG.74.1	.
MSTRG.74.2	.
MSTRG.74.3	.
MSTRG.74.4	.
MSTRG.75.1	.
MSTRG.76.1	.
MSTRG.77.1	.
MSTRG.78.1	.
MSTRG.79.1	.
MSTRG.80.1	.
MSTRG.80.3	.
MSTRG.80.2	.
MSTRG.80.4	.
MSTRG.80.5	.
MSTRG.80.6	.
MSTRG.80.7	.
MSTRG.80.10	.
MSTRG.80.8	.
MSTRG.80.9	.
MSTRG.80.12	.
MSTRG.80.11	.
MSTRG.80.13	.
MSTRG.80.16	.
MSTRG.80.14	.
MSTRG.80.15	.
MSTRG.80.17	.
MSTRG.80.19	.
MSTRG.80.20	.
MSTRG.80.18	.
MSTRG.80.21	.
MSTRG.80.22	.
MSTRG.80.23	.
MSTRG.80.24	.
MSTRG.80.25	.
MSTRG.80.26	.
MSTRG.80.27	.
MSTRG.74.6	.
MSTRG.74.5	.
MSTRG.74.7	.
MSTRG.74.8	.
MSTRG.81.1	.
MSTRG.82.1	.
MSTRG.80.30	.
MSTRG.80.28	.
MSTRG.80.29	.
MSTRG.80.31	.
MSTRG.80.33	.
MSTRG.80.32	.
MSTRG.80.34	.
MSTRG.80.35	.
MSTRG.80.36	.
MSTRG.80.37	.
MSTRG.80.39	.
MSTRG.80.38	.
MSTRG.83.1	.
MSTRG.84.1	.
MSTRG.84.2	.
MSTRG.85.1	.
MSTRG.86.1	.
MSTRG.80.40	.
MSTRG.80.42	.
MSTRG.80.41	.
MSTRG.80.43	.
MSTRG.80.44	.
MSTRG.80.45	.
MSTRG.80.46	.
MSTRG.87.1	.
MSTRG.88.1	.
MSTRG.83.2	.
MSTRG.74.9	.
MSTRG.89.1	.
MSTRG.80.47	.
MSTRG.90.1	.
MSTRG.90.2	.
PGSC0003DMT400081823	Conserved gene of unknown function
MSTRG.90.4	.
MSTRG.91.1	.
PGSC0003DMT400081963	HEAT repeat family protein
MSTRG.91.3	.
MSTRG.91.4	.
PGSC0003DMT400081965	Importin beta-3
PGSC0003DMT400082036	HEAT
PGSC0003DMT400081827	Conserved gene of unknown function
PGSC0003DMT400081828	Carboxy-lyase
PGSC0003DMT400082037	Conserved gene of unknown function
MSTRG.95.1	.
MSTRG.95.2	.
MSTRG.95.3	.
MSTRG.95.4	.
MSTRG.96.1	.
MSTRG.97.1	.
MSTRG.98.1	.
MSTRG.99.1	.
PGSC0003DMT400082038	Late blight resistance protein
MSTRG.101.1	.
MSTRG.102.1	.
MSTRG.101.2	.
MSTRG.101.3	.
MSTRG.103.1	.
MSTRG.101.4	.
MSTRG.104.1	.
MSTRG.104.2	.
MSTRG.105.1	.
MSTRG.106.1	.
MSTRG.105.2	.
MSTRG.107.1	.
MSTRG.108.1	.
PGSC0003DMT400081830	NL0E
PGSC0003DMT400081969	Pentatricopeptide repeat-containing protein
MSTRG.111.1	.
PGSC0003DMT400081832	Maintenance of killer 16 (Mak16) protein
MSTRG.112.2	.
PGSC0003DMT400081835	Serine/arginine-rich protein
MSTRG.113.2	.
MSTRG.113.3	.
MSTRG.113.4	.
MSTRG.113.5	.
PGSC0003DMT400081837	Glucan endo-1,3-beta-glucosidase 4
MSTRG.115.1	.
MSTRG.116.1	.
PGSC0003DMT400082043	Extensin Dif10
PGSC0003DMT400082044	Extensin Dif54
MSTRG.118.1	.
PGSC0003DMT400082047	Neutral amino acid transport protein
PGSC0003DMT400081843	Uncharacterized BCR, COG1963 family protein
PGSC0003DMT400082048	Amino acid transporter
PGSC0003DMT400081849	Conserved gene of unknown function
PGSC0003DMT400081973	Serine/threonine-protein phosphatase
MSTRG.123.1	.
MSTRG.123.2	.
PGSC0003DMT400081851	Dead box ATP-dependent RNA helicase
PGSC0003DMT400081852	Protein AFR
PGSC0003DMT400081974	Conserved gene of unknown function
MSTRG.126.1	.
PGSC0003DMT400081975	Non-specific lipid-transfer protein
PGSC0003DMT400081854	Conserved gene of unknown function
MSTRG.128.2	.
MSTRG.129.1	.
MSTRG.129.2	.
MSTRG.129.3	.
MSTRG.129.4	.
PGSC0003DMT400081860	KH domain protein
PGSC0003DMT400081977	Conserved gene of unknown function
MSTRG.131.1	.
MSTRG.132.3	.
MSTRG.132.1	.
MSTRG.132.2	.
MSTRG.132.4	.
PGSC0003DMT400082049	Conserved gene of unknown function
PGSC0003DMT400082050	Dirigent 2
MSTRG.134.1	.
MSTRG.134.2	.
PGSC0003DMT400081864	RRNA-processing protein EBP2
MSTRG.135.1	.
MSTRG.135.2	.
MSTRG.135.3	.
MSTRG.135.4	.
MSTRG.136.1	.
PGSC0003DMT400081985	Tap46
PGSC0003DMT400081865	Casein kinase
MSTRG.138.1	.
PGSC0003DMT400081870	Conserved gene of unknown function
MSTRG.139.2	.
PGSC0003DMT400081875	Gene of unknown function
MSTRG.141.1	.
MSTRG.142.1	.
PGSC0003DMT400081988	Metal tolerance protein
PGSC0003DMT400081989	Acidic ribosomal protein P1a
MSTRG.145.1	.
MSTRG.145.2	.
MSTRG.145.3	.
MSTRG.145.4	.
PGSC0003DMT400081990	Transcription or splicing factor
MSTRG.147.1	.
PGSC0003DMT400081991	RRNA-processing protein EBP2
MSTRG.147.3	.
PGSC0003DMT400081993	GTP-binding protein
MSTRG.149.1	.
PGSC0003DMT400081998	Ubiquitin ligase SINAT2
MSTRG.149.3	.
MSTRG.149.4	.
PGSC0003DMT400081995	Ubiquitin ligase SINAT2
MSTRG.150.1	.
PGSC0003DMT400081999	Nse1 non-SMC component of SMC5-6 complex family protein
MSTRG.152.1	.
MSTRG.152.2	.
MSTRG.152.3	.
PGSC0003DMT400081879	Cysteine protease ATG4B
MSTRG.153.1	.
MSTRG.153.3	.
PGSC0003DMT400082004	Restricted tev movement 1
MSTRG.154.2	.
PGSC0003DMT400082006	Conserved gene of unknown function
PGSC0003DMT400081880	Lipoate-protein ligase B
PGSC0003DMT400081881	10-formyltetrahydrofolate synthetase
PGSC0003DMT400081883	Peroxidase
MSTRG.158.1	.
PGSC0003DMT400082008	Peroxidase
MSTRG.159.2	.
PGSC0003DMT400081888	NDR1
MSTRG.160.2	.
MSTRG.160.1	.
MSTRG.160.3	.
PGSC0003DMT400082052	NDR1
PGSC0003DMT400081896	Structural molecule
MSTRG.161.1	.
PGSC0003DMT400081898	DEAD/DEAH box helicase family protein
MSTRG.161.3	.
PGSC0003DMT400082009	1,3-beta-glucan synthase
MSTRG.163.1	.
MSTRG.164.1	.
MSTRG.165.1	.
PGSC0003DMT400082011	Callose synthase 3
MSTRG.166.2	.
MSTRG.167.1	.
PGSC0003DMT400082053	U-box domain-containing protein
PGSC0003DMT400081902	U box
MSTRG.170.1	.
MSTRG.170.2	.
MSTRG.170.3	.
PGSC0003DMT400082014	Extensin
MSTRG.171.1	.
MSTRG.170.5	.
MSTRG.170.6	.
MSTRG.172.1	.
MSTRG.170.7	.
MSTRG.172.2	.
MSTRG.172.4	.
MSTRG.172.3	.
PGSC0003DMT400082054	Cysteine-rich extensin-2
PGSC0003DMT400082016	Extensin
MSTRG.172.6	.
MSTRG.172.7	.
PGSC0003DMT400082017	D12 oleate desaturase
PGSC0003DMT400081904	Enoyl-acyl-carrier-protein reductase
MSTRG.174.2	.
PGSC0003DMT400082057	COG5125
PGSC0003DMT400081905	Conserved gene of unknown function
MSTRG.176.1	.
MSTRG.177.1	.
PGSC0003DMT400082019	Selenoprotein O
PGSC0003DMT400082022	Pentatricopeptide repeat-containing protein, chloroplastic
MSTRG.178.2	.
MSTRG.179.1	.
PGSC0003DMT400081907	Alcohol dehydrogenase
MSTRG.180.1	.
MSTRG.180.2	.
MSTRG.181.1	.
PGSC0003DMT400081909	Lipoxygenase
MSTRG.182.1	.
MSTRG.183.1	.
PGSC0003DMT400082023	Lipoxygenase
MSTRG.184.1	.
MSTRG.185.1	.
MSTRG.185.2	.
MSTRG.186.1	.
MSTRG.187.1	.
PGSC0003DMT400081912	Oxidoreductase, 2OG-Fe(II) oxygenase family protein
MSTRG.188.1	.
MSTRG.188.2	.
MSTRG.188.3	.
PGSC0003DMT400082027	Oxidoreductase, 2OG-Fe(II) oxygenase family protein
MSTRG.188.5	.
MSTRG.188.6	.
MSTRG.188.7	.
MSTRG.188.8	.
PGSC0003DMT400081914	Oxidoreductase, 2OG-Fe(II) oxygenase family protein
MSTRG.189.1	.
MSTRG.188.10	.
MSTRG.188.11	.
MSTRG.188.12	.
MSTRG.190.1	.
[truncated: 69,447 more rows]
