# Supplementary material for: Genome-Wide Identification and Characterization of Potato Long Non-coding RNAs Associated With Phytophthora infestans Resistance
Source: Front Plant Sci. 2021 Feb 10;12:619062. doi: 10.3389/fpls.2021.619062 (PMC7902931; doi:10.3389/fpls.2021.619062)
Supplement: Supplementary Table 5 — The expression level of all transcripts based on TPM. [file Table_5.XLSX]

## Sheet: TPM_up1_leat1
Gene	Transcript	ht0_1	ht0_2	ht0_3	ht3_1	ht3_2	ht3_3	ht4_1	ht4_2	ht4_3	mht0_1	mht0_2	mht0_3	mht3_1	mht3_2	mht3_3	mht4_1	mht4_2	mht4_3	mrt0_1	mrt0_2	mrt0_3	mrt3_1	mrt3_2	mrt3_3	mrt4_1	mrt4_2	mrt4_3	rt0_1	rt0_2	rt0_3	rt3_1	rt3_2	rt3_3	rt4_1	rt4_2	rt4_3
PGSC0003DMG400015132	PGSC0003DMT400039134	0	0	0	0	0	0	0	0.505883	0	0	0	0	0	0	0	0	0	0.694881	0	0	1.67418	0	0.460782	0.870349	0	1.86774	0	0	0.561667	0.588345	0	0	0.870215	0	1.25517	0
MSTRG.3	PGSC0003DMT400058594	0.683898	1.45345	6.35061	0.25436	1.16174	1.37197	11.8732	11.5777	3.13843	11.1516	13.7441	0	5.53192	3.04431	12.4894	1.02913	0	1.51897	0	9.88906	15.0916	4.40111	6.21167	2.50834	1.12313	51.0211	0	0	0	0	1.22824	1.13784	1.95375	2.34405	2.31205	6.84553
MSTRG.6	PGSC0003DMT400058700	4.04824	2.66617	0	0	0	0	0	0.200283	0.2422	0	0	2.77271	0.455414	0	0	0	0	0	0	0.321835	0.205732	0	0	0	0	0.180816	0	0.761595	0.717507	1.7755	0	0	0	0	0	0.143138
MSTRG.7	PGSC0003DMT400058653	16.2638	17.3303	9.74747	22.7777	27.0889	25.6599	26.4965	28.2684	31.8445	9.71391	12.2292	17.2804	23.8049	29.2794	25.815	23.9868	16.0427	21.744	11.8184	7.53314	8.38536	27.3192	29.5203	25.7717	22.3177	31.3189	18.4879	17.6229	12.4017	7.33989	32.6761	28.6981	23.3312	27.7566	33.2656	27.6888
MSTRG.8	PGSC0003DMT400058600	0.35518	49.6538	0	0.058145	0.174665	8.65821	0.099369	20.7267	0.06606	0	0.114439	27.3086	15.4644	0.184594	0.115406	0	0	0.337401	0.059054	14.5421	0	0.16252	0.279451	0.027549	0.285022	0.337149	15.6963	0.534609	0	0	0.19478	0.207849	0.031463	0.313415	10.1788	12.1883
MSTRG.11	PGSC0003DMT400058668	9.40132	11.334	3.98677	4.17518	6.3646	7.31471	5.38232	4.85727	5.75548	3.41054	3.30204	8.20506	8.70096	2.72128	6.97539	5.92183	6.57485	7.82273	4.73004	6.36456	4.42729	0.602496	0.957293	5.55234	4.48614	7.37668	6.2664	0.78761	0.090645	8.25921	1.47037	5.87247	0.047773	0.036349	5.70078	6.29942
MSTRG.12	PGSC0003DMT400058609	6.29559	0.790854	1.92382	9.976	5.05214	9.27775	0	1.48735	0.182953	20.9368	4.70124	0.587487	6.97614	0.29268	0.61693	0.135957	0	8.25207	4.15579	2.12821	0.160605	3.08163	0.68911	0	0	1.11785	4.57873	0	0	0.182924	0.053855	0.178422	2.09681	0.315755	0.414901	0.216247
MSTRG.13	PGSC0003DMT400058670	0	3.84962	1.21268	32.0757	25.2948	14.4551	0	29.3732	26.9775	1.13835	0.375626	0	0.433141	3.27904	11.404	55.8612	4.56222	34.9734	0	0.858193	3.74952	16.7409	15.1516	14.7862	38.4839	0.569401	0	0	0.647072	0	29.3379	0	20.2306	35.0966	20.2142	7.29905
MSTRG.10	PGSC0003DMT400058659	12.0317	0.459613	0	8.95132	35.9486	3.99081	22.0297	0.074269	3.03282	0	0	6.02705	5.4726	38.7417	1.31372	0.297857	0.109828	12.2728	0	0	0	10.7592	0.128389	2.54262	8.22767	9.60946	0.484191	11.5822	20.563	0	1.72483	0.273653	7.47759	17.3035	0.075417	10.451
MSTRG.14	PGSC0003DMT400058615	27.8796	24.3351	19.5525	20.765	16.296	18.5966	16.4875	11.2547	1.68599	17.663	18.7711	11.9415	14.9365	19.1439	2.99206	21.3376	18.1245	17.8794	4.10677	24.8442	3.67154	2.82469	2.54024	5.00421	17.7216	5.25938	14.4747	24.5968	21.3845	22.559	17.4325	16.8731	7.1093	9.60795	11.2281	4.56245
MSTRG.15	PGSC0003DMT400058619	0	0	0	2.78385	0	0	0	0	0.472268	1.26702	1.18942	0	0	0	0	0	0	0	0	0	0	0.655162	0	0	0	0	0	0	0	0	0.149756	0	0	0	0	0
PGSC0003DMG400022793	PGSC0003DMT400058674	0	0	0	0	0	0	0	0	0	3.04392	2.0198	0	0	0	0.327383	0	0	0	0	0.474173	0.328456	0	1.28478	0	0	0	0	0	0	0.913474	0	1.0127	0	0	0	0
MSTRG.17	PGSC0003DMT400058701	0	0	0	0	0	0.569684	0	0	0	1.8716	1.45491	0.720138	0.285153	0	0.258882	0	0	0	0.365726	1.0134	0.10473	0.484361	0.716924	0	0.140342	0	0	0.232618	0	0	0	0	0	0.160104	0	0
MSTRG.16	PGSC0003DMT400058673	71.5559	52.3317	69.9062	23.9805	7.43544	23.8692	19.2267	13.7554	26.5024	37.786	40.3156	83.11	27.6777	30.6791	31.911	18.8197	45.3819	30.6285	37.7056	53.9151	44.0803	19.5401	23.6524	22.2214	19.0999	60.5577	16.0263	44.8461	54.1633	62.4255	30.2895	21.2369	30.1192	12.5946	22.7864	23.5156
MSTRG.19	PGSC0003DMT400058675	1.90197	1.86124	1.99583	1.67564	1.47361	2.56982	1.2035	0.256959	1.24633	1.60782	0.307102	2.76848	1.56233	1.28588	0.775386	0.934972	1.06993	1.15427	1.56787	1.11509	1.1304	0.866899	0.1696	0.896771	1.23283	2.29303	0.72664	2.05193	0.359717	0.165729	0.338476	0.164696	0.562176	0.935674	0.386321	0.770501
MSTRG.20	PGSC0003DMT400058622	0.45597	0.285269	1.09641	0	0.341129	0.70587	0.1425	0.757972	0.534688	2.34595	0.890788	0.591888	0.13501	1.07698	0.320769	0.959304	0.362945	0.794621	0.079501	0.433201	0.780327	0.445113	0.67352	0.361996	0.57268	0.946849	0.743966	0.359323	0.276777	0.209888	0.604479	0.372462	0.233176	0.916506	1.1745	1.06897
MSTRG.21	PGSC0003DMT400058625	0.47588	0.413629	0	0.638771	0.218509	0.097964	0.472268	0.622757	0.381635	1.88621	1.36787	0.735591	0.478397	1.19247	0.3971	1.52911	1.29958	0.947587	0.327034	1.63113	1.45157	0.744631	0.569789	0.480606	0.813779	1.07534	0.124399	0	0.308339	0.721573	0.65318	0.48508	0.407753	0.539625	0.300005	0.601447
MSTRG.18	PGSC0003DMT400058621	63.0612	65.8164	29.9591	0.807756	0.788627	1.46569	2.97492	7.48688	5.1795	52.6817	67.3886	72.2327	0	0.59996	0.77019	0.203893	0.116662	0.381414	0.114993	54.6127	50.1995	0.766801	1.68136	0.487853	0.054217	1.59237	0.638167	57.382	54.7653	64.9438	0.818026	0.535867	0.720049	5.44739	2.1574	9.34329
MSTRG.25	PGSC0003DMT400058631	0.603337	0	0.39423	0.330984	0.188704	0	1.53713	0.54508	1.69404	2.03375	0.964144	0.320835	0	0.547127	0.922697	0	0	0	0.343029	0.225744	0.087719	0.431587	0.29789	0.15682	0.2501	0.492097	1.26984	0	0.403457	0.14878	0.163438	0.321418	0.359321	0.855955	0.194312	0.973893
PGSC0003DMG400022781	PGSC0003DMT400058632	1.33955	0.59386	0	0.387569	0.144822	0.684107	0	0.215629	0.548679	0	0	2.15422	0	0.415565	0.580371	1.76971	0.666873	1.0706	0.69217	0.398435	0.318228	0.458679	0.53959	1.00172	0.868285	2.14654	0.398715	1.19658	0.486189	0.863042	0.593828	0.249215	0.549802	0.350505	0.369745	0
MSTRG.26	PGSC0003DMT400058676	7.40431	10.2627	0	0	4.97624	0	0	0	0	0	0	0	0	13.9869	8.38425	0	0	8.92407	0	0	0	11.6156	10.7355	0	7.51409	20.0765	0	0	0	0	0	0	10.0975	0	0	0
MSTRG.23	PGSC0003DMT400058629	4.35527	4.04866	17.3134	10.3605	11.8686	11.3468	12.6193	17.7228	17.879	29.6434	23.2494	6.40429	4.71585	6.87803	8.18102	11.7114	6.31754	7.62858	4.1277	22.2048	34.8496	3.8219	7.60782	8.03532	9.18864	21.7319	7.70629	3.77618	1.62861	2.6081	8.92602	10.8336	11.4597	10.7607	13.8039	24.2293
MSTRG.22	PGSC0003DMT400058627	85.8687	2.54367	9.41976	48.6191	0	39.8459	51.4139	32.6844	35.9158	0	17.2459	24.2901	60.9489	50.3938	42.1094	115.167	86.6927	103.478	13.0217	16.9671	4.23196	62.0729	49.1657	24.7324	99.0045	109.604	81.9427	0	42.0015	11.3012	44.8117	30.2563	39.432	48.3992	0	37.0867
MSTRG.29	PGSC0003DMT400058639	0.51632	1.03949	0.521443	0	0	0.774835	1.54559	0	0.515255	0	0	0	1.11243	0	0.435868	0	0.47087	0	0.897841	0	0.87157	0.392459	1.64135	0.958802	1.12003	1.54646	0	0	0	0.143327	0.961239	0	1.16796	0.879923	1.6024	0
MSTRG.28	PGSC0003DMT400058680	18.9269	24.1399	26.436	55.1184	57.267	56.2864	4.78107	47.0698	43.3501	26.4315	3.76357	15.9869	40.6156	50.1297	46.3212	26.0057	22.7451	24.7467	20.7818	17.6792	6.13844	35.8275	31.7333	82.8971	26.2428	24.5619	28.6541	19.8292	26.429	20.5152	61.0814	62.5938	40.8098	34.4875	42.4334	50.7062
MSTRG.27	PGSC0003DMT400058635	0	0	0	2.28031	0	0	0	0.355117	0	0	0	0	2.20432	1.63111	0.454906	0	1.55909	0.567781	0	0	0	0.426777	0	0	0.256326	0.850582	0	0.159489	18.874	0	0	0	0.481673	0	0.505387	0
MSTRG.30	PGSC0003DMT400058682	0.483937	0.168823	0	0	0	3.77783	0	0	0.615286	0	0	0	0	0	0	0.892688	0	0.318123	0.584318	0	0.221862	0.536131	0	0	0	0	0	0.808439	0	0.467388	0.583083	0	0	0	0	0.047209
MSTRG.30	PGSC0003DMT400058685	2.2605	3.61517	7.06219	3.76389	1.88467	2.30322	4.15659	1.91373	1.91997	7.24739	6.04258	2.71571	3.67415	3.14343	3.36096	2.30886	1.31852	1.81215	3.77135	6.74014	3.06514	2.805	2.98095	0.958067	3.2989	3.3478	2.05077	1.95286	4.84424	3.69294	2.51936	2.78054	3.1328	3.56624	1.79123	0.906018
MSTRG.31	PGSC0003DMT400058642	0	0	0	0.071307	0.000251	2.1e-05	0	0	0.506111	0.893104	0	0	0.821334	1.7e-05	0.543838	0.080801	0.305844	3e-06	0	0	0	0	0	0.000114	0.408948	0.849055	0.211742	0	0	0	0.132789	0.120654	0.049062	0.922269	0.017012	2.70487
MSTRG.32	PGSC0003DMT400058643	3.96997	0	5.06677	4.26793	2.52921	0	0	4.58579	0	3.32264	5.38244	2.52508	3.51361	4.39646	0	3.86331	3.55467	4.0638	2.98833	3.98235	3.03151	0	3.80542	2.77492	5.59145	4.21208	3.69906	0	2.28555	2.1234	2.54167	2.33406	2.049	0	3.14466	4.7008
MSTRG.31	PGSC0003DMT400058647	2.05444	1.15169	2.20481	2.7213	3.66866	3.55617	3.93018	3.58206	2.24754	3.91589	3.33865	1.04162	1.36952	3.33198	2.74813	4.11217	2.99499	1.57438	1.49041	2.62461	2.64396	2.88203	3.85155	2.19319	4.79878	2.44874	2.94409	2.67989	0.662243	0.514569	3.86326	4.06702	1.58976	4.47372	3.98359	4.36386
MSTRG.31	PGSC0003DMT400051415	1.47705	0.37383	3.66891	1.94959	3.12434	2.13222	3.48262	2.27689	1.47612	2.80199	5.06149	2.21417	2.47697	1.04023	3.02292	4.93245	2.97504	2.84821	1.95013	2.84843	2.53322	1.69274	1.3801	2.30509	3.99132	3.39844	1.53064	2.26976	1.66989	1.42621	3.01255	2.67822	1.66388	1.46896	3.54809	2.1672
MSTRG.37	PGSC0003DMT400051417	0.346513	0.587015	0.49857	0	0.236137	0	0	0	0	0	0	0.724206	0.384991	0	0	0	0	0.552344	0.910186	0.867728	0.730065	0	0	0.342313	0.210281	0.341428	0	0.471177	1.06201	1.08423	0.1523	0	0.481294	0	0	0.208809
MSTRG.38	PGSC0003DMT400051425	15.7331	19.9715	22.8207	24.1055	23.3342	21.8311	19.7976	21.1893	20.5343	28.0678	23.8546	17.864	22.0749	18.0578	18.2041	25.0557	17.2067	22.5594	14.767	20.3594	20.6896	23.487	20.1343	18.6644	22.347	17.1398	21.2097	19.1181	14.799	11.5349	23.1432	23.1109	17.44	20.9291	20.7397	18.4094
MSTRG.36	PGSC0003DMT400051416	84.3543	76.1618	167.6	38.0627	34.2991	38.4756	40.1814	39.4162	41.128	129.305	115.435	101.443	43.748	50.3996	36.179	59.2775	53.9831	55.3082	159.224	127.898	133.748	37.7495	28.5919	32.3273	63.2927	68.4418	55.0347	106.082	116.709	99.086	38.0848	34.0792	32.5932	37.4482	39.1916	45.7727
MSTRG.41	PGSC0003DMT400084010	0.915022	1.20098	0	0.307877	0	1.85563	0.571921	0.253512	1.04233	0.39997	1.21193	2.97839	0	0.335892	0.532131	0.563858	1.17506	2.27294	1.88894	0	0.347212	0.391416	0.615758	0.851887	1.13527	1.63546	0.299792	0.374031	0.187644	0.707002	0	0.298976	0.25996	0.132699	0.343418	0.539914
MSTRG.39	PGSC0003DMT400051426	27.7678	23.802	30.6258	14.608	13.7535	13.7889	13.2331	11.6535	13.6388	37.4595	37.5399	27.2396	17.2977	15.3672	14.0147	19.0378	16.8424	18.8563	19.7573	33.7376	22.4822	17.4427	15.911	13.4195	19.2573	9.75495	17.394	20.1321	16.1785	17.1433	14.2662	12.9006	14.1344	14.9448	11.7407	9.95313
MSTRG.43	PGSC0003DMT400077766	3.78496	0.878881	2.04891	0	0	0	0	0	0	0.935123	0.851948	2.80212	1.1002	0.20514	0.422807	1.95003	0.952381	1.46043	5.83625	1.21914	1.23063	0.482298	0.713209	0.89331	1.40076	1.98246	0.268616	2.62498	2.1447	4.22291	0	0	0.547826	0.326732	0.313368	0
MSTRG.47	PGSC0003DMT400025172	0	0	0	0	0	0	6.83797	11.7377	4.79814	0	0	0	3.02041	0	14.7323	2.55068	1.63401	5.0121	0	1.06398	3.15766	4.78532	13.2479	6.4646	0	25.6242	0	0	0	0	0	0	5.71075	0	3.72633	3.86222
MSTRG.45	PGSC0003DMT400025178	13.5238	9.09418	58.6398	11.6152	7.83468	11.3212	7.46892	11.7581	5.97341	44.2581	29.4347	9.51913	7.64321	8.40472	8.75314	13.4656	11.6085	8.77453	9.27097	62.6191	67.4512	7.72453	6.31461	10.407	8.75853	12.8514	8.89031	10.2439	16.1671	24.2951	8.07008	7.301	12.4799	9.08909	11.3074	10.8213
MSTRG.46	PGSC0003DMT400025176	3.77236	4.21617	1.87481	5.55548	4.47265	6.16817	7.14622	5.67566	2.98165	3.22668	0.990755	3.28106	5.96847	7.0205	3.89624	4.75073	2.9412	3.18277	4.93461	1.95449	2.13225	1.12411	3.3386	3.78042	4.12766	5.35459	3.31309	1.85791	3.62828	2.70571	2.86459	3.53329	6.67786	2.35991	5.83318	3.36404
MSTRG.52	PGSC0003DMT400080976	0.219131	0	1.96013	0	0	0	0	0	0	0.770814	0.217676	0	0	0	0	0	0	0	0.17193	0.150861	0.868098	0	0	0.208553	0	0	0	0.069258	0.532507	0.536042	0	0	0	0.095337	0	0
MSTRG.50	PGSC0003DMT400025186	2.62305	2.84096	0.783687	0.338054	0.433331	0	0.191768	0.63332	0.274492	0.627339	2.03628	2.10469	0.212401	0.187521	0.152588	0.096535	0.089457	0.091601	0.052905	0.33734	0.216851	0.036241	0	0.104272	0.03943	0.125617	0	0.429081	0.525465	0.902347	0.058351	0.164141	0.160921	0.428318	0.123873	0.328449
MSTRG.49	PGSC0003DMT400025169	42.2458	37.7599	441.03	74.6858	46.4783	79.9457	11.9994	8.59263	18.6652	612.327	493.124	52.8262	35.4004	31.5156	22.1308	48.5126	48.1236	36.2334	57.9873	554.571	665.149	32.0727	39.4697	59.3737	39.8139	24.0567	54.3853	30.4498	48.969	74.8824	57.6542	46.405	58.7559	42.9268	14.838	17.3832
MSTRG.53	PGSC0003DMT400081775	14.2687	18.9501	17.3666	13.5417	16.7486	14.3281	16.5838	15.4752	15.8864	17.6701	19.9772	23.271	13.4268	13.393	14.9453	13.2429	8.99797	9.53838	5.1779	25.2494	23.7781	11.4782	14.8441	11.9076	12.1132	13.8536	11.6849	13.5427	11.7791	14.7954	13.86	16.5654	15.4496	17.4125	16.7309	16.4408
MSTRG.58	PGSC0003DMT400081921	0	4.08038	2.72772	0	0.607285	0	5.6441	53.2701	21.8034	3.2382	4.99311	5.11092	2.46107	4.9262	6.00191	3.06521	0	3.36097	0.807724	9.62774	7.32671	3.7987	2.53826	0.841127	0.662944	33.7503	0	1.8737	1.97573	2.29512	0.809047	0	1.908	29.0321	4.048	61.3042
MSTRG.57	PGSC0003DMT400081918	0.829529	0.649923	1.34179	2.49654	1.40149	1.48014	2.13641	1.75553	2.47454	0	0	0	3.57942	0.995018	2.55221	2.53815	1.46378	2.6308	1.58647	0	0.323304	3.55284	4.03369	2.63369	2.30086	2.2544	4.01524	0	0	2.90652	3.40923	2.25814	3.02163	3.90517	2.90997	3.80746
MSTRG.55	PGSC0003DMT400081915	0.225704	1.29028	3.41031	0.923257	1.98019	0.324449	0.431859	0.391097	0	0.766175	0.457564	0	0.217638	0.755774	0	0.215035	0	3.46747	0	0	0.961067	1.27469	0	1.08826	1.11372	0	0	0.582335	0.682537	1.75396	0	0.225758	0.336507	0	0.136482	0.270606
MSTRG.56	PGSC0003DMT400081916	1.06636	2.39662	3.72555	2.58114	0.616048	0.835432	0.210036	1.89827	0.767623	2.62897	0.64981	0.65102	3.46337	1.42045	1.21517	4.51175	3.49416	1.77805	2.15057	0	2.16181	0.693666	0.617348	0.74463	1.22001	1.285	2.25594	0.414917	1.47936	1.42836	0.859565	0	0	1.09567	0	0.65486
MSTRG.54	PGSC0003DMT400081778	0	18.9389	68.8981	46.3089	56.7866	47.0605	50.5608	28.1534	24.993	64.4019	83.4323	22.2856	55.5366	48.4836	31.7779	5.31938	0	62.8829	32.2477	52.6254	31.8052	54.7885	11.2168	7.66978	65.8769	31.1443	57.5922	14.0361	20.1023	51.1696	38.8181	13.5645	25.1807	43.3146	23.751	31.884
PGSC0003DMG400032163	PGSC0003DMT400081936	0	0	0	0	0.2834	0	0.230848	0.409305	0.481357	0	0	0	0.220364	0.273895	0.254627	1.11498	1.76196	0.356943	0	0	0	0	0	0	1.15217	0	0.590512	0	0	0.178509	0	0	0	0.159615	0	0.21793
MSTRG.61	PGSC0003DMT400081934	4.78874	2.48565	0.712327	1.11066	0.939178	0.298906	0	0	0	0.628078	0.197056	2.66046	1.10725	1.34754	0.414008	0.367963	1.139	0.722212	2.98327	0	0.670262	0.688437	0.200241	1.22197	0.47409	0.255327	1.0347	3.33747	3.04373	3.77059	0.433958	0.819289	0.64152	0.230149	0	0
MSTRG.63	PGSC0003DMT400081787	2.4937	4.55311	5.71462	2.50579	3.02186	0	3.78912	1.04336	1.99556	3.89037	0	5.43699	0	6.79407	4.04788	3.18754	3.22289	3.75694	10.7182	2.97586	5.72104	7.53719	5.01023	3.95519	4.71431	0.713764	2.69316	2.51232	13.2356	0	2.30549	5.12537	2.20396	3.25067	2.56773	1.32765
MSTRG.65	PGSC0003DMT400081938	0	0	0.170209	1.65438	0.700022	0.413881	1.01237	0	1.67358	0.142948	0	1.00128	1.1052	2.0495	2.43022	0	3.79984	2.18237	0.286231	0.940791	0.994206	1.67414	2.12936	0.814043	1.61639	1.02974	0.203808	1.22955	0.835551	0	1.07367	0.12055	0.031863	1.12459	0.413506	0.641603
MSTRG.64	PGSC0003DMT400081939	7.30201	5.96105	5.02994	7.44392	5.81959	8.96781	8.98085	8.24211	7.30184	5.39529	4.97022	5.39561	10.8707	7.40122	7.09318	8.57662	4.48587	13.2716	4.35628	4.28911	5.21936	12.0955	10.1172	7.19286	10.2654	7.03231	11.363	3.93314	4.17797	4.26652	8.49124	8.18139	8.70203	10.6138	7.8621	6.4204
MSTRG.60	PGSC0003DMT400081929	0	0.001102	7.32527	7.1607	0.948704	0.904501	0	0.001765	0.644845	0	1.65024	2.39964	4.40989	0	0.05678	0.832514	0.659483	0.057297	2.68865	0.383851	0.016603	0.344103	0.550761	0.025543	0.22445	0	0.525553	0	0.767412	3.41326	0.659087	4.5731	0	0.467787	5.43162	0.193811
MSTRG.59	PGSC0003DMT400081782	1.35273	0.999948	2.77069	6.94154	1.67892	4.24108	0.755449	4.07879	1.85521	11.8872	8.15327	3.01405	5.87466	7.97045	1.36332	1.45937	1.20318	1.17737	1.36334	1.2181	0.227052	3.06373	1.19322	3.12819	2.09675	1.18586	5.87417	0.656327	4.45368	0	0.926374	0.760552	0.866598	4.04667	1.25062	4.42473
MSTRG.66	PGSC0003DMT400081942	18.8547	9.90905	13.2841	12.8379	3.78144	9.85481	7.86668	8.14264	12.5994	7.24357	7.75792	9.48412	9.89989	8.06582	10.5821	12.3132	9.79655	9.44796	8.30465	9.49497	4.90898	11.6831	12.2519	11.9198	9.6595	14.0349	7.60512	5.72241	15.5115	7.94942	12.1931	8.55964	12.4077	7.86636	8.61593	8.05352
MSTRG.68	PGSC0003DMT400081790	4.24712	7.31569	26.8201	357.31	313.513	551.086	637.903	592.612	528.319	40.2053	31.6382	8.53684	211.934	231.492	456.571	193.528	151.115	183.559	15.5584	29.0616	34.5005	221.615	421.137	364.322	163.435	268	134.48	5.16741	4.82078	8.75677	445.491	393.697	520.529	265.671	525.017	519.254
MSTRG.67	PGSC0003DMT400081788	42.536	52.8102	21.946	46.3957	40.0009	43.234	40.2692	36.3112	45.0646	17.7265	17.7574	38.2406	57.5172	53.2305	52.2253	55.5855	40.9525	56.979	30.4177	10.8326	12.8911	65.0952	9.64879	57.5382	51.0374	37.8666	46.1846	40.196	40.0931	24.6356	57.0247	49.116	44.5265	53.8535	43.7865	32.0231
MSTRG.70	PGSC0003DMT400082032	2.47808	10.1521	25.9495	81.4112	76.9907	76.7853	42.4048	46.0231	36.1273	53.1644	22.4337	7.417	48.5122	64.7012	41.2006	92.6114	90.749	78.1263	8.65602	35.1653	55.6135	28.693	30.0822	41.3378	83.9959	22.6792	104.216	4.40448	7.96494	8.93201	69.9475	114.387	77.1227	52.3272	59.649	49.2274
MSTRG.69	PGSC0003DMT400081943	3.56431	2.30756	12.5988	0.125258	0	3.26613	0.478903	0	0	0	0	0.776935	3.99309	2.85977	0.030682	0	4.52249	0.64351	2.59067	0	0.448225	0.047446	0.043113	0.453966	2.13382	0	2.83322	0	2.21075	2.6756	0	0	0.03645	0.416434	0	0
MSTRG.71	PGSC0003DMT400081950	49.4879	53.5294	62.6845	67.4234	57.6749	67.226	81.9035	73.5016	82.5301	46.7317	46.5383	53.3161	52.8302	60.6319	59.4861	61.4644	58.1685	67.5713	62.8975	47.4681	48.9195	62.9524	67.5395	57.1262	63.4587	64.9026	57.1785	49.2356	54.8055	50.583	67.7442	64.9834	65.5141	59.1595	65.5289	71.6145
MSTRG.72	PGSC0003DMT400081953	133.397	130.311	216.664	369.302	337.057	339.368	385.714	376.082	347.935	237.863	197.877	147.019	299.118	303.119	343.996	217.775	202.03	237.036	217.004	197.2	213.921	275.648	269.515	351.401	200.015	225.316	233.411	155.597	212.737	174.881	347.314	354.742	306.218	251.434	365.4	322.64
MSTRG.93	PGSC0003DMT400081828	0.28096	0	0	0	0.755836	2.65443	0	3.49564	0	0	0.269855	0	0	2.54534	3.01565	0.929232	0.428847	3.84698	0	0.586024	0	1.00071	3.64136	2.53214	2.92689	4.06473	0.54792	0	0.269334	0.857895	3.49402	0.915486	4.02449	2.72624	1.45464	3.57835
MSTRG.92	PGSC0003DMT400081827	3.51723	3.03205	4.99428	2.97458	3.22247	4.01535	4.88769	3.90037	2.77541	3.04957	4.45016	3.87846	2.88309	2.19292	2.75987	3.07121	2.92337	2.47817	2.73712	4.16248	5.12428	2.86483	3.19928	2.04006	3.25525	2.74154	3.89904	2.97203	3.52564	3.49834	3.40946	2.80725	3.51144	3.89746	3.29142	3.35936
MSTRG.94	PGSC0003DMT400082037	15.0188	14.0028	63.874	32.1128	32.5334	31.4483	25.1587	27.5147	26.9459	78.3363	74.6159	16.462	29.5511	30.431	32.4938	28.0155	18.2378	24.6189	18.309	62.4863	77.2674	31.8389	30.9936	26.5538	23.2479	21.7336	22.2722	14.1256	16.6972	11.0949	34.4808	29.6622	27.5627	27.4549	31.3224	25.8573
MSTRG.91	PGSC0003DMT400081965	0	0	0	5.07379	0	0	0	0	0	0	0	0	0	0	0	0	0	0	0	0	5.67081	0	0	0	1.46105	0.259664	0	5.88823	0	0	0	0.102542	0	0	0	0
MSTRG.91	PGSC0003DMT400081963	21.6309	18.864	9.24252	9.95751	10.405	0	11.7671	10.4761	10.1905	0	0	15.6822	0	9.74958	9.40078	0	12.14	13.575	13.161	0	6.27979	12.1402	8.64814	9.96968	15.4652	0.069614	9.46374	10.4433	9.79571	15.3917	0	10.1757	10.0094	12.3303	9.31231	6.36843
MSTRG.91	PGSC0003DMT400082036	3.84854	5.35025	0.844378	5.72644	1.08867	4.8153	2.7972	3.80606	0.3921	1.68452	1.7436	0.834323	3.2459	0.537564	0.395567	0.997806	2.3999	3.09422	1.10591	1.92247	1.15203	3.69686	0.628036	0.4302	0.324019	0.425397	6.5109	7.60741	1.34206	0	0.372182	4.95789	0.441902	5.03043	3.96404	5.22197
MSTRG.109	PGSC0003DMT400081830	2.71801	2.94878	4.41059	2.04534	2.85723	2.09769	2.02145	3.27024	3.53156	3.43223	5.4906	2.70036	5.475	3.18742	4.61849	2.67646	1.72192	4.44022	2.09951	3.18396	3.24896	4.66524	5.24947	3.4218	2.3807	3.97507	3.12647	1.85844	2.03878	1.54837	3.44392	2.80416	2.92548	7.53826	3.63456	3.62469
MSTRG.110	PGSC0003DMT400081969	3.89726	5.3097	5.69707	3.18579	3.20113	2.95667	2.36469	2.61667	2.69741	5.14533	4.1385	4.91534	3.18501	2.60492	3.11066	3.06568	3.1104	3.18508	3.96843	3.36975	2.5385	3.35921	3.03578	2.46567	3.36914	3.15801	2.68191	4.33557	4.59856	3.45082	2.55948	1.88527	3.19456	2.36071	3.39493	3.60347
MSTRG.112	PGSC0003DMT400081832	142.974	74.5489	96.9442	71.6481	68.3699	76.2449	51.2487	76.6989	72.8712	90.9392	99.6521	130.328	105.812	59.1634	50.972	85.1523	66.8997	87.5933	149.989	80.8923	96.4267	97.4597	88.7002	64.718	85.7339	94.508	95.1933	111.655	113.015	156.105	66.5685	60.1269	42.2126	107.945	61.8319	74.9041
MSTRG.113	PGSC0003DMT400081835	77.1039	144.855	14.0918	58.1099	18.3071	16.3322	32.1654	0	19.0772	39.0242	193.434	33.3061	19.7268	47.9272	74.3978	14.0094	118.19	35.278	20.4557	17.6028	0	9.00927	19.0137	20.2787	16.4111	31.3645	107.982	21.7255	25.5214	26.3253	37.1229	11.9331	28.0545	10.0621	14.0945	14.1747
MSTRG.114	PGSC0003DMT400081837	15.6347	21.9257	15.7587	17.5758	16.0099	14.1575	17.5577	12.4851	13.8399	16.0619	14.6412	16.0546	17.7618	13.8547	13.1981	16.8621	11.3636	17.4331	12.3817	13.774	16.6	14.1858	13.4128	12.7656	14.048	8.70714	14.9106	15.1762	16.6077	13.2813	14.3267	15.8092	11.3148	11.8331	16.0084	9.53741
MSTRG.117	PGSC0003DMT400082043	5.11789	4.00389	1.80531	4.01806	3.15631	4.43918	2.8774	1.16193	2.91471	1.93011	1.58181	3.96529	2.85853	1.88325	3.082	3.37678	2.01319	3.02771	5.82746	2.15736	0.894876	3.15913	3.58995	2.18753	3.47331	4.57411	2.02339	8.6207	2.82288	1.583	2.66299	2.92413	2.48574	2.70532	2.19704	3.35182
PGSC0003DMG400032223	PGSC0003DMT400082044	0.781004	0.608844	0.385419	0.783317	0.241471	0.758732	0.366451	0.352105	0.342261	0.159062	0.070765	0.626631	0.370471	0.454041	0.414801	0.732305	0.328697	0.387979	1.41497	0.456435	0.141376	0.304263	0.383033	0.529445	0.471539	0.688049	0.690861	1.37343	1.08177	0.83487	0.378992	0.477633	0.627982	0.35384	0.272007	0.50145
MSTRG.118	PGSC0003DMT400082047	4.59723	5.44737	20.9496	12.9906	12.9122	12.7019	14.7383	13.2993	11.1129	23.4567	17.4746	3.78552	13.1797	14.3749	10.5625	13.8347	10.4778	11.7869	7.00734	21.3688	22.9961	11.7858	9.44089	11.6037	14.1312	7.82167	11.6763	5.6083	4.26138	6.33127	14.0464	16.523	11.4973	11.4112	16.7225	11.7871
MSTRG.119	PGSC0003DMT400081843	2.34233	2.34198	11.7831	4.52679	5.03314	5.4474	4.34542	5.5772	5.33046	14.6064	17.6896	2.64588	4.08641	5.32925	5.27013	2.16486	2.7623	2.47998	1.72794	13.9032	14.8562	3.30537	4.91066	5.70286	2.97897	5.3099	2.19178	2.17287	3.32724	3.07762	4.93306	4.47527	4.71547	4.74491	5.29172	7.73091
MSTRG.120	PGSC0003DMT400082048	1.05126	2.36824	31.8107	8.24842	6.80769	6.49404	5.13818	8.32241	8.60347	29.3083	32.9622	2.13627	5.83505	6.46168	7.26287	5.82544	6.02442	6.00784	2.45157	25.8614	28.9974	5.27266	9.00797	5.26552	6.85001	6.11469	6.62511	1.54183	2.03255	2.62034	7.41823	5.95846	7.89744	7.83805	8.67546	7.09366
MSTRG.121	PGSC0003DMT400081849	2.5296	2.32431	6.68757	2.99781	2.9602	7.49271	5.43616	4.11871	6.19043	4.93691	3.88148	2.81964	3.54319	3.09593	5.68292	1.55436	3.11964	3.44551	3.0781	4.63427	4.2911	4.0394	7.8208	3.20109	2.46729	6.05957	2.45663	2.31943	1.69167	2.35555	5.79267	4.32573	4.69018	4.58725	4.96179	5.36237
MSTRG.122	PGSC0003DMT400081973	40.2837	31.6604	56.8684	62.1142	59.614	67.1988	63.025	63.9245	68.2681	73.1995	67.4252	43.5708	67.0499	55.9304	63.5004	57.2876	46.2339	57.7484	41.1603	65.4038	67.7171	57.9962	62.561	55.032	50.8121	63.7761	49.7167	36.6682	41.4736	36.3149	60.9505	63.8737	67.4126	53.2747	56.4176	56.297
MSTRG.125	PGSC0003DMT400081974	4.94507	9.34758	22.6999	32.3437	46.3084	31.2274	30.7374	33.8226	31.732	21.1106	15.2742	6.83935	28.9325	40.8799	28.7675	26.3426	19.676	19.2867	11.7773	16.927	21.9462	35.1439	30.3642	22.3818	28.1441	19.1149	21.3899	13.3684	17.4427	23.9557	26.9146	36.1697	24.2587	35.882	35.2099	28.0665
MSTRG.127	PGSC0003DMT400081975	2.74965	4.70562	3.08671	1.79168	1.83408	0.826229	0	1.01979	0	2.70421	1.66974	0.441185	2.64058	2.9429	2.01009	1.49462	0.997698	2.28727	2.54301	3.56881	4.58908	3.72538	4.79915	0.356474	4.84872	2.07269	2.86885	3.06349	1.52774	6.38998	0.621422	2.23648	1.268	5.28596	1.07608	0.803525
MSTRG.123	PGSC0003DMT400081851	19.2547	0	0	9.71986	17.5332	0	0	22.1726	15.132	16.4875	0	20.1593	0.586891	26.7261	0.034643	0.049977	0.159077	22.9371	0	22.9986	16.2452	19.3461	17.6294	0	22.9451	21.4423	0.052612	16.1038	0.065861	0	0.174693	0	15.8174	0.138329	0.03172	28.9519
MSTRG.124	PGSC0003DMT400081852	6.48829	6.74191	6.13525	6.09959	4.31714	7.50755	7.82491	7.30815	6.4783	11.389	10.8937	6.77578	4.87602	4.65067	5.11294	6.40625	5.205	5.76572	7.05363	9.23837	9.67023	5.61431	5.59604	4.40286	6.18127	6.16607	8.24613	7.36175	4.65716	4.2741	6.48439	6.75052	6.29392	7.94652	6.11739	6.54873
MSTRG.128	PGSC0003DMT400081854	7.1208	7.30273	4.44708	5.14391	6.61252	4.8712	4.17957	4.87541	6.687	9.05258	9.12326	7.58341	3.55906	4.59508	4.62032	8.22607	5.05984	7.15358	7.13721	6.92957	6.28208	5.75868	5.53798	4.67995	7.39174	5.28405	5.49379	7.9494	4.69568	4.56903	5.09785	4.69514	4.70797	5.308	5.90993	4.40414
MSTRG.90	PGSC0003DMT400081823	0	16.1126	0	13.1785	8.91108	0	0	11.2542	13.6668	0	0	0	0	0	0	0	0	0	11.0615	0	12.8709	12.485	15.9887	0	0	13.8172	0	4.74313	3.15896	12.5968	12.5247	8.05717	12.9598	10.5844	11.7399	4.05259
MSTRG.129	PGSC0003DMT400081860	11.2819	5.47107	9.5473	13.6326	0.641711	0.055696	10.2959	0	1.96054	0	1.49884	11.2114	0.69378	1.10738	9.55053	2.49651	2.42891	8.00688	10.021	10.2717	4.96541	1.70294	8.5165	4.15472	0.464858	0.334244	0	9.86281	7.15428	0	12.138	6.39562	1.91947	1.95598	0	10.1458
MSTRG.130	PGSC0003DMT400081977	72.6734	58.8954	33.9586	49.1825	45.8717	45.5018	48.2289	28.4457	43.4499	15.3001	15.0637	71.9076	63.8316	65.1403	52.2138	51.3817	48.738	54.8628	49.5715	17.2694	17.8446	73.3134	64.9388	28.9959	58.2149	67.0624	48.5013	53.1166	46.8442	48.6342	51.7436	53.2786	50.6263	41.3296	32.7032	25.4549
MSTRG.133	PGSC0003DMT400082049	1.05827	0.939338	0.862611	1.26015	0.514061	5.48822	3.41044	20.2666	10.7559	0.317856	0.520277	0.874008	2.42382	2.31949	14.742	2.16373	0.635347	2.07184	0.83595	0.489008	0.227159	5.70325	8.03171	6.8241	0.679259	9.46501	0.174538	0.623599	0.595887	0.38835	4.05296	0.39472	1.28941	4.61825	4.8087	9.60528
MSTRG.134	PGSC0003DMT400081864	1.68138	4.42052	22.2308	13.562	3.90541	6.88187	2.16613	1.13345	3.07603	9.54529	3.99799	1.68847	6.0671	3.1509	1.20623	1.73781	1.85802	1.59999	9.39385	5.24525	3.52821	3.14319	1.68446	9.97034	1.51024	4.95988	6.5092	6.24983	1.19499	5.32858	14.6135	1.17313	11.0157	1.11875	3.08202	4.45996
MSTRG.137	PGSC0003DMT400081985	22.6423	25.6978	51.1823	28.0901	29.5575	31.2729	28.5858	38.2472	33.9108	63.2052	58.3812	21.1743	26.9549	28.7218	30.8314	24.6247	23.9516	21.2994	21.2706	64.5902	51.9555	25.859	31.5521	31.6569	19.5836	31.662	19.5141	20.0636	17.9228	17.1926	33.123	29.8207	29.3442	33.0878	33.1005	37.6561
MSTRG.139	PGSC0003DMT400081870	18.3064	20.3167	24.5834	12.4356	7.59634	8.39	6.46954	2.99516	7.52729	17.3222	9.95053	15.3955	12.689	13.7457	13.7926	12.4644	7.60435	15.8794	34.0661	12.1297	15.2745	14.4821	14.3372	9.61908	9.91999	17.2503	11.2325	19.9165	30.0113	26.358	13.4492	6.06988	13.5749	8.47854	6.07373	7.65477
MSTRG.140	PGSC0003DMT400081875	10.5035	8.04596	9.71975	4.77252	1.94268	4.64709	1.07572	3.66217	3.27798	5.81622	3.60729	8.50417	7.34837	4.05885	4.08429	4.6791	6.27745	5.61481	12.1542	5.71517	5.25362	6.225	6.22324	2.44079	5.43875	6.11582	3.07173	10.085	10.1583	14.5774	3.18892	3.59843	5.30608	4.22755	2.37932	2.30788
MSTRG.143	PGSC0003DMT400081988	67.9412	71.102	57.7861	73.6417	63.9253	85.0653	78.5124	61.1568	72.7171	58.0068	45.0039	62.1802	69.4452	88.8295	85.2724	53.5294	57.1911	45.3908	62.6531	55.6122	55.6714	80.8823	88.9152	103.019	61.1379	42.0811	60.7414	78.4882	82.9935	71.9561	86.3333	72.3514	70.894	64.4611	69.821	57.0914
MSTRG.138	PGSC0003DMT400081865	3.45923	2.51856	1.7797	3.26013	7.37389	6.30714	7.39724	2.82752	3.99962	5.34405	3.62913	3.11657	3.06586	4.94186	4.39136	6.05921	4.0385	2.88355	2.57368	2.93345	1.34904	5.17453	3.40334	3.1495	3.74162	3.93924	4.69461	4.47676	2.73758	0.301958	4.55523	2.5364	3.43902	4.5346	2.11621	4.97583
MSTRG.146	PGSC0003DMT400081990	1.36751	2.58064	1.92205	0.827055	1.51893	1.39183	0.869745	1.47504	1.27237	1.6316	2.17883	1.88599	0.555249	1.04234	0.897243	1.34578	0.882844	1.165	2.30352	1.27873	1.19003	0.669652	0.691739	1.3025	1.16858	1.86878	0.785327	1.98158	2.10169	0.300199	1.24893	0.989919	0.688155	0.968937	0.71052	1.60139
MSTRG.147	PGSC0003DMT400081991	11.8388	4.05818	14.6379	22.1496	5.81366	11.0974	12.7277	9.26482	9.32728	18.287	44.2178	9.69586	11.7725	15.2162	6.21183	9.75827	9.14546	8.57519	12.9504	41.6011	11.9207	4.56318	20.611	8.74641	2.34706	11.9314	5.07952	12.4762	13.4888	13.1611	4.23885	3.75431	4.76886	5.65368	18.4225	5.50564
MSTRG.148	PGSC0003DMT400081993	3.49753	4.62817	8.95258	6.093	6.41748	8.07773	4.85014	7.20498	5.85374	12.2235	8.99607	4.622	4.24463	5.03003	5.53861	4.00001	3.34436	4.12134	3.75949	9.4973	9.16132	4.23503	5.14865	7.9531	4.37046	4.02672	4.79052	4.61233	3.55714	2.6026	7.33543	8.40375	4.24269	5.92586	6.09621	6.22941
MSTRG.144	PGSC0003DMT400081989	719.322	609.215	507.705	435.039	390.317	435.688	407.911	405.237	351.191	443.432	479.771	640.178	495.73	405.773	489.977	401.109	406.921	482.411	928.16	603.71	495.037	383.95	390.178	529.565	352.258	419.807	465.979	760.335	713.076	1079.45	383.88	405.153	500.076	343.411	317.188	355.756
MSTRG.151	PGSC0003DMT400081999	1.08207	0.978384	3.90558	0.770093	4.35359	2.3604	2.33438	3.0075	3.75391	5.51756	5.68279	0.534728	1.32206	1.02374	2.33212	1.57981	2.57176	2.13659	0.397913	4.37808	5.44587	3.30018	1.87031	4.01539	1.4189	0.967808	1.4915	0.614907	0.200383	1.12878	2.90048	4.92548	2.44777	1.59313	1.6958	1.94389
MSTRG.149	PGSC0003DMT400081998	0	6.19458	8.62728	0	0	0	0	4.29537	0	5.39855	8.5961	0	0	5.3245	3.42041	0	0	0	0	0	7.28585	0	0	2.78515	0	0	0	3.74185	0	0	0	0	3.75435	0	0.719892	0
MSTRG.149	PGSC0003DMT400081995	0.954048	1.01517	1.70859	2.16661	1.89871	3.30256	3.2516	3.93486	2.88339	2.84182	2.62388	2.07475	1.75644	2.19064	2.5099	2.98229	2.7118	2.29471	1.42482	2.40044	1.64357	1.86952	2.88363	1.74772	2.48259	2.81159	3.16346	1.60251	0.955978	0.324644	3.31305	1.90484	2.301	2.90155	3.77229	2.70688
MSTRG.154	PGSC0003DMT400082006	1.84692	1.03385	0.648232	0	1.03025	1.29978	0	1.35491	1.17104	2.18708	0.877378	0	0	0.173368	2.07827	1.1012	0.415756	0.909819	0.489128	3.61894	2.96438	1.75612	1.69234	1.49471	0.434414	1.29064	1.19085	0	0	0.939992	0.389286	0.763854	0.687763	1.29336	0.861144	0
MSTRG.155	PGSC0003DMT400081880	10.848	10.982	12.4874	8.34446	4.68966	8.38119	3.0886	7.77452	7.73614	11.0053	7.97744	8.81161	8.31535	5.98967	6.27904	7.08192	3.0745	9.87089	9.19319	10.9679	12.3288	8.22605	6.72348	9.24475	4.8729	3.66052	3.4116	7.16462	5.15938	7.03029	7.36902	5.50316	8.4276	6.10188	5.89602	3.55597
MSTRG.153	PGSC0003DMT400081879	21.988	0	28.1982	26.9718	22.4266	24.5602	12.9952	25.1694	18.1323	38.7949	36.4858	0.313227	18.0096	0.420292	14.5048	0.283124	13.9222	13.4531	20.8547	37.6913	32.4946	14.3699	17.7534	18.1323	20.1718	18.9703	3.95049	25.747	16.9517	16.3938	27.8157	7.55617	25.4561	23.055	21.2943	21.4156
MSTRG.157	PGSC0003DMT400081883	0.831902	10.7243	3.26666	19.5526	9.66862	19.423	65.9032	124.552	71.8642	5.54309	3.37636	2.63841	115.217	54.1395	114.118	28.6138	4.49551	129.139	1.59716	5.08541	2.64599	218.477	159.795	81.3683	26.5375	22.5782	34.0463	0.828078	0.489047	2.17168	55.9854	23.8438	41.6263	200.106	136.93	102.958
MSTRG.159	PGSC0003DMT400082008	0	6.8133	0	86.0008	81.0693	98.5012	220.862	130.794	44.009	0	0	1.48063	102.306	128.991	177.784	46.7092	26.6589	60.464	0.286783	0	0	178.244	75.7136	157.445	44.6921	2.4464	36.776	0.34003	0.402066	0.321237	134.199	97.8859	75.0129	126.936	125.79	78.7985
MSTRG.156	PGSC0003DMT400081881	37.6739	39.336	72.8512	202.047	196.503	170.502	194.435	191.232	182.79	94.7112	70.7283	43.7577	214.509	219.772	191.678	156.967	123.532	146.799	64.7486	92.4975	84.8457	201.128	166.313	221.016	130.318	117.25	118.909	49.4458	53.0472	42.9383	219.248	214.448	181.341	179.657	233.781	204.005
MSTRG.160	PGSC0003DMT400081888	8.41094	9.41593	3.07824	1.27324	1.13597	0.309107	1.02962	10.0215	3.24837	5.58007	9.68167	1.86089	0.679673	1.96498	0.99699	1.7821	0.320438	0.740095	0.289742	3.78214	1.45039	0.197626	2.09545	0.691564	0.297223	2.40354	0.702729	2.30511	2.89568	2.5886	0.458715	0.787633	0.286545	1.87022	3.45688	6.99834
MSTRG.160	PGSC0003DMT400082052	9.94219	24.3529	4.99308	1.79787	4.11911	1.48303	1.98131	11.324	6.36227	7.54858	19.171	4.85632	0.542429	4.23844	1.62348	2.02722	0.987455	0.710072	0.473985	5.99029	3.00942	1.40245	2.82819	1.11463	0.623714	7.0472	0.575154	5.68465	5.6458	5.96581	0.909139	1.1439	1.44369	14.6342	5.32763	14.8146
MSTRG.161	PGSC0003DMT400081898	0	0	0	0	0	0	0	0	0	0	0	0	0	0	0	0	0	0	0	0	1.46192	0	0	0	0	0	0	0	0	0	0	2.08601	3.46269	0	0	0
MSTRG.162	PGSC0003DMT400082009	40.1418	39.7435	28.0125	38.6214	37.0168	40.247	47.9791	49.0781	56.2145	39.5418	37.3234	46.3605	31.6361	34.6838	34.7574	40.7668	26.4076	38.5291	34.1586	26.3295	26.9209	34.5858	36.325	26.1633	40.637	40.5437	35.3394	43.59	22.994	14.8312	43.9562	34.8348	28.375	40.6345	48.0915	51.6914
MSTRG.168	PGSC0003DMT400082053	1.89365	2.8795	1.70327	2.83997	2.7467	3.11499	2.25319	3.21513	2.11606	2.49667	1.74148	3.44597	2.1798	2.42702	2.07763	3.46718	1.3932	2.05784	2.50968	0.872711	1.20308	4.23612	3.36802	2.12902	3.10144	3.71315	2.84771	2.499	1.43572	0.344448	3.08963	2.35366	2.21148	2.72358	2.37557	3.16968
MSTRG.169	PGSC0003DMT400081902	3.76802	5.26622	1.65742	2.31144	1.71446	3.29822	1.604	1.49201	2.48174	2.01	0.760676	3.52522	3.47022	2.42409	3.03679	1.83925	2.21443	2.52704	4.34374	1.39408	0.952502	3.25545	3.40131	1.64089	2.25443	2.64719	1.55627	3.13084	2.82441	3.15365	4.40777	2.73305	2.68793	2.15625	1.89023	2.17532
MSTRG.166	PGSC0003DMT400082011	9.28515	9.83134	5.149	20.2901	18.1146	17.6586	23.5763	18.6896	21.0731	7.9435	7.95915	10.3164	18.1029	20.7604	19.9322	14.657	9.51676	17.8559	10.679	4.00608	4.12381	23.1196	23.1044	18.6608	18.1442	9.13586	14.3893	12.6583	6.24958	4.99172	24.3881	20.7449	10.3029	14.443	19.2216	14.805
MSTRG.172	PGSC0003DMT400082054	4.35211	5.05849	16.4608	7.51499	17.3233	4.42229	5.7161	3.94372	3.4017	3.54944	3.84257	6.51385	14.0768	16.9113	4.97068	40.5067	16.719	17.2816	3.55142	4.67565	3.13679	13.1213	4.73556	8.34962	20.1962	2.64869	22.1737	2.69391	1.32653	2.36917	8.7757	16.465	5.21446	6.76434	13.7762	8.16148
MSTRG.170	PGSC0003DMT400082014	21.3452	1.63284	32.3998	42.5096	2.39703	1.85797	7.38327	3.0343	3.79054	6.12987	6.17623	11.1339	145.843	3.62531	1.12171	63.1	44.3333	70.825	2.10211	8.62984	14.9042	160.817	141.295	75.9556	490.109	4.89614	2.75067	0.939862	3.13988	6.47792	3.10877	340.143	0.971526	155.66	4.50755	14.2583
MSTRG.170	PGSC0003DMT400082016	11.9388	14.045	11.6403	16.7232	33.7963	15.4438	6.96428	1.61859	0.121862	1.9352	9.28684	5.56919	368.578	39.6554	25.399	21.4143	12.1276	28.2729	12.9175	8.17433	11.7595	44.9537	20.8716	14.1288	270.874	5.38251	61.4232	58.6069	15.2821	32.8521	35.6294	227.088	63.195	179.932	63.7817	27.4352
MSTRG.174	PGSC0003DMT400081904	1.50794	0	0.544547	12.7033	15.6552	9.18757	4.59509	6.24904	8.0936	2.37959	1.14111	1.04955	9.60958	18.6255	14.3834	4.36132	3.38058	2.84588	2.25002	1.92045	3.3728	15.9342	12.5166	20.8035	4.85237	1.45549	5.88168	1.46371	5.44112	1.3941	17.1788	18.3185	9.27615	3.30378	5.27543	3.83414
MSTRG.175	PGSC0003DMT400081905	11.031	10.9288	10.6194	10.3785	10.297	13.4488	8.09429	11.0148	8.20311	11.5915	10.0484	9.04668	7.8129	10.3787	10.524	6.74083	10.1547	10.2643	9.43099	5.16622	6.66154	12.2596	12.76	10.0712	10.8313	10.3122	11.194	6.09045	7.92631	6.42934	10.9962	10.2955	12.3351	12.0051	10.0357	11.5473
MSTRG.173	PGSC0003DMT400082017	82.2672	93.4436	303.669	614.376	599.228	676.109	1039.1	711.44	699.184	228.956	200.068	94.627	733.574	800.406	704.114	883.511	660.031	1249.39	226.413	236.673	290.862	523.732	468.967	514.698	1078.75	757.958	744.045	133.989	206.995	172.59	725.293	863.266	653.029	580.055	1215.84	719.609
MSTRG.177	PGSC0003DMT400082019	0.065734	0	0	0	15.3714	20.8745	0	0	18.5978	14.8777	0	1.03111	8.67645	14.3021	15.5738	0	0	13.1959	10.3268	0	17.0358	0	0	14.9305	0	18.0079	1.32686	6.61154	0.439374	0	21.8071	16.7529	11.4389	14.8316	5.75048	0
MSTRG.178	PGSC0003DMT400082022	0	0	4.61258	0	0	4.91602	0	0	4.66943	0	5.71408	0	0	0	1.83345	0	0	0	7.1425	0	2.50679	0	0	0	4.333	0	0	0	0.574139	0	0	0	0.970686	0	0	2.69917
PGSC0003DMG400032155	PGSC0003DMT400081909	0.182174	0.568318	0	0.137916	0.366965	0.639931	0	0.151417	0.116778	0.658016	0.358705	0	0.910274	0.980853	0.596	0.814878	0.366102	0.188313	1.3022	0.12606	0.116759	1.00094	0.44756	0.816985	0.360546	0.19652	0.126987	1.32713	1.37003	0.593172	0.378826	0.130571	0.293262	0.585692	0.330479	0.284897
MSTRG.185	PGSC0003DMT400081912	4.45653	4.89595	16.6586	26.6542	34.4032	16.4071	2.08182	1.58884	1.56274	10.4653	5.01911	7.88543	17.7645	26.0839	3.78261	15.657	20.6002	9.22124	9.23685	10.3185	15.5623	10.5079	5.25957	14.9967	15.4535	1.3794	25.0672	9.62305	15.7441	13.3274	17.7501	26.8888	9.34928	10.3377	6.72583	3.41334
MSTRG.179	PGSC0003DMT400081907	10.957	6.44517	34.7615	52.9347	46.8154	47.9434	6.51722	6.05805	6.43765	26.0809	4.71353	7.96127	10.7654	6.87749	8.06998	8.18926	8.3643	10.5205	41.079	5.63757	28.6145	5.17082	9.04267	6.66768	7.30384	11.6573	39.1559	5.37782	9.04995	12.6705	7.35543	50.217	10.6751	37.857	40.9674	35.792
MSTRG.197	PGSC0003DMT400055029	1.50157	0.673296	1.56044	0.702075	0.498784	1.04319	0.30472	0.850045	1.10581	0.478044	2.08996	1.36216	0.766803	0.361542	0.607813	2.41553	1.32372	0.877362	3.31056	1.00393	0.731345	0.582861	0.491567	0.20259	0.98705	0.633843	1.47909	1.49155	1.49898	1.32884	0.588372	0.552752	0.860719	2.26246	0.605415	0.929927
MSTRG.199	PGSC0003DMT400055102	1.43494	1.30919	3.09306	3.90818	0	4.19897	2.2376	3.83813	0.524384	3.43055	0	1.62261	1.59964	2.51198	0.445038	1.5943	0.885233	1.50581	1.30448	0	0	0.669282	1.26006	3.58324	1.22208	2.56399	0.861909	2.06169	0	0.379087	4.02929	0	0.526182	0	0.902632	0.029232
MSTRG.200	PGSC0003DMT400055014	0	0	1.84032	0	0.617297	0.004279	0	0	0	0	0	0	1.23918	0.768972	0	0	0	0	1.01103	0.507892	0.062701	0.436286	0	4.2511	0.86035	0.15367	0.921009	0	0	0	0	0	0.558339	0	0	0.211571
MSTRG.203	PGSC0003DMT400055095	0.257702	0.953658	0.907812	0.509849	0	0.486709	0	0.299871	0	0.73188	0.716778	0.494216	0.208422	0.330357	0.455738	0.721831	0.442086	0.723163	0.904499	0.349512	0.595318	0.314951	0.624313	0.530025	0.607493	0	0.72696	1.7356	1.31293	0.638294	0.381518	0	0.115087	0.271327	0.229071	0
MSTRG.204	PGSC0003DMT400055011	19.5988	19.7445	21.1957	25.3404	20.9688	27.4128	22.1905	19.9745	22.0244	17.4356	17.7979	18.8867	20.335	22.9872	18.192	30.323	24.2622	22.8939	16.795	19.0458	19.2375	21.502	25.1672	19.8963	24.9722	23.2837	22.1625	19.6922	24.0649	20.8715	20.7023	26.3388	24.6047	24.74	25.4721	19.9215
MSTRG.205	PGSC0003DMT400055008	19.6016	0	0	0.63014	0	0	7.06696	0	0	0.683809	5.81561	8.43679	8.1213	3.30958	7.20797	7.11558	0	0.732217	0	0	1.20535	6.48825	0.071583	0.339494	3.71004	0.520947	0.270506	2.16414	3.52892	0.724262	0	1.86351	4.15095	0	0	5.0233
MSTRG.192	PGSC0003DMT400055111	0	0.208189	9.88273	2.52707	69.495	11.3519	0	0	0	0.755813	0	0.499577	5.34403	18.2528	1.28485	4.46925	11.1778	2.12502	0.903363	2.38654	2.64283	8.67412	1.16705	6.19612	2.07554	0	16.8046	0	11.0653	4.65367	6.46621	3.10795	4.65439	23.291	3.10664	5.3975
MSTRG.188	PGSC0003DMT400008936	76.2504	72.3303	372.239	274.23	282.2	203.761	40.5993	17.598	24.2552	262.964	112.84	109.497	177.352	259.695	62.9087	210.896	212.645	128.036	212.504	238.797	354.599	151.977	73.8759	222.701	194.954	6.91899	246.31	205.237	335.102	282.448	157.445	333.729	150.937	99.5819	72.3481	44.1445
MSTRG.188	PGSC0003DMT400082027	25.0394	48.5452	227.652	111.46	127.579	97.8428	23.5138	8.99903	18.5918	147.456	51.7539	78.9019	53.5717	81.9186	37.6571	113.822	112.583	72.2867	133.511	152.018	222.14	87.7474	49.005	131.664	113.898	2.85263	146.353	80.3612	205.94	214.473	64.6802	148.221	83.7084	58.7252	40.7481	31.3623
MSTRG.188	PGSC0003DMT400081914	0.162064	0.130838	1.52424	1.62191	0.84939	0.975554	0.623734	1.9081	1.75552	0.815432	0.046494	0.080118	1.53607	1.08896	2.70288	1.11451	0.453771	0.437861	3.55033	0.685239	1.04946	1.64242	3.12492	6.75817	0.684486	0.497755	0.0623	0.698834	1.87487	0.541957	4.82808	17.0091	3.50052	0.168959	1.01419	2.88934
MSTRG.193	PGSC0003DMT400008933	1.89956	2.89667	1.53559	0.527071	0.754489	0.71529	1.43931	0.618217	0.819342	0.991881	2.22278	3.92554	1.41283	0.599644	0.767697	1.3784	1.0017	2.07915	0.884213	1.75689	2.20303	0.477133	0.826637	0.443756	0.926422	1.26455	1.1003	1.08518	0.942143	1.89529	0.86403	0.359021	0.799973	0.9659	0.752424	0.511745
MSTRG.206	PGSC0003DMT400055001	9.8897	10.6571	12.7355	32.7568	28.1771	24.7603	24.2894	20.4598	24.0144	16.0865	14.442	9.44125	17.2773	21.7574	22.1504	19.8869	13.8614	15.6243	11.8788	16.5757	15.0445	22.2199	20.5728	25.7232	13.5076	16.7718	12.9628	9.73166	8.85557	9.19999	27.0266	32.7323	24.7364	18.4615	26.5832	21.6802
MSTRG.207	PGSC0003DMT400055091	10.3904	9.29402	4.17754	5.21087	5.69248	7.93428	6.51727	6.28919	7.21715	6.38097	6.45653	2.5015	4.51014	4.97382	5.26852	6.51318	4.12752	4.97136	6.56878	4.88425	3.67449	6.52869	7.22703	5.59756	6.1506	8.33277	6.90619	9.82228	4.26685	2.67673	7.85292	5.87868	4.79269	5.3858	5.64014	6.19978
MSTRG.208	PGSC0003DMT400054994	5.57444	20.4451	8.19923	4.23268	1.50313	1.90797	1.53596	0.318006	0.917276	30.7431	32.5267	10.6942	1.38523	1.47637	1.19987	2.02617	1.40223	3.31801	4.49159	9.99568	4.03853	5.18115	2.80476	0.894019	3.29135	0.732741	4.649	4.64332	1.75728	2.87156	2.18323	2.26978	0.421184	1.578	0.810128	0.105889
MSTRG.210	PGSC0003DMT400054989	15.4755	18.1239	9.36405	23.2133	21.741	21.5264	22.8135	17.7445	18.8916	5.86933	5.59001	14.8673	21.8339	24.3179	17.7009	22.734	19.5404	21.0532	14.6622	7.98841	7.3603	19.3773	20.2372	19.114	25.7531	19.8061	18.9163	13.0862	18.0066	11.3903	26.3092	24.6212	20.0743	17.7142	22.3647	14.8078
MSTRG.212	PGSC0003DMT400055085	4.0263	2.77363	4.18138	16.3302	3.89203	7.33417	5.7732	1.97045	2.34089	3.18287	0.642927	3.25033	8.87408	8.13491	3.62182	5.86729	13.5995	1.74526	10.0121	3.47698	5.29803	1.65247	1.66219	3.93911	9.60972	1.75528	12.3016	4.52662	5.12196	2.48914	5.60313	11.7251	4.52768	2.54569	4.81199	2.32628
MSTRG.211	PGSC0003DMT400055088	14.7117	15.8835	5.63194	23.2343	15.6223	24.5609	22.4443	25.083	26.7922	12.2072	11.7818	17.0525	25.594	22.9523	27.1491	20.9926	27.9094	29.1596	9.2622	4.27095	7.2247	26.8033	35.1546	8.25629	22.3995	18.5411	16.8227	13.355	3.9131	5.69283	5.12877	19.6177	19.914	28.6135	20.8966	17.732
MSTRG.214	PGSC0003DMT400055081	8.35603	11.158	19.0187	23.511	29.838	21.5634	10.5501	17.0704	7.41195	10.8828	20.4881	11.3476	12.3108	28.9412	10.2892	7.83239	17.7753	16.1204	9.99023	8.739	16.6935	34.3928	27.9275	15.09	33.3036	5.68702	18.9362	10.7219	17.1688	14.104	23.0911	25.2434	16.9418	32.4633	18.6015	4.40485
MSTRG.213	PGSC0003DMT400055082	0.12875	0.019941	1.01357	0.922103	0.489225	0.231851	0.524931	0.838031	0.563022	0.026105	0.035625	0.010847	1.24948	0.156109	0.560849	0.707212	0.196583	0.575167	0.234342	0.008273	0.352514	0.322576	0.382299	0.54121	0.513479	0.856385	0.028102	0.402323	0.295206	66.2812	0.592254	0.485993	0.889817	0.359909	0.515141	0.439053
MSTRG.215	PGSC0003DMT400055078	17.1203	32.852	40.8922	58.7353	69.341	32.9701	21.0747	20.2666	16.8593	47.5205	37.897	12.8687	64.2795	73.6546	25.9524	65.678	45.3231	50.8634	20.502	62.9699	58.4931	64.9552	29.6449	70.7559	65.2085	7.39727	49.1117	22.9459	20.6074	18.4006	54.0705	70.185	28.1389	56.1831	37.6835	22.0409
PGSC0003DMG400021338	PGSC0003DMT400054983	0	0	0	0	0.071764	0.383692	0.230803	0.154431	0.396692	0	0	0	0	0	0.104406	0	0	0.42398	0.128495	0.12534	0	0	0	0	0.329465	0	0.121341	0	0	0	0	0.118567	0.135737	0.215383	1.55478	1.10589
MSTRG.217	PGSC0003DMT400055076	0.939436	0.853755	1.07527	1.03185	1.02891	1.32487	0.685559	1.1508	0.632793	1.83182	1.66282	0.600766	0.732039	0.722208	0.628587	0.492904	0.614666	0.548367	0.533838	1.88045	1.6585	0.670577	0.914771	1.39688	0.181634	0.58821	0.402061	0.773643	0.626872	0.585417	0.935509	0.998002	0.459931	0.862731	0.674752	1.38244
MSTRG.218	PGSC0003DMT400054981	7.95495	8.49488	10.5159	5.62598	6.72066	6.33199	7.15761	6.95763	6.92773	6.46946	8.51542	5.06655	2.8058	4.13698	3.56285	6.16136	4.14084	6.44531	9.75409	5.86221	9.42746	4.13395	6.58335	5.4367	2.58757	7.974	5.54207	5.4477	9.41246	7.35152	4.75822	6.67295	6.27437	4.6465	4.57622	4.35912
MSTRG.216	PGSC0003DMT400054985	51.6559	53.6165	26.2454	68.4699	53.3417	63.7374	73.1121	0	13.6632	12.3291	0.184908	44.3085	0	58.3131	56.9918	80.3183	64.392	77.137	36.6032	29.308	25.7725	72.7134	39.5881	50.8479	76.166	53.7748	58.5572	48.7822	44.1937	38.3672	58.7574	62.0182	59.5781	66.3608	69.1472	30.6302
MSTRG.219	PGSC0003DMT400054979	4.85879	0	0	0	0	0.585944	15.305	0.39343	4.07796	0	0	0	0.938525	0	0.378934	0	0	0	0	12.1678	11.0888	0	0	0.233856	0.048566	2.31013	11.8631	0	0	0	11.3425	10.0538	13.8588	0.04371	0	0.371211
MSTRG.222	PGSC0003DMT400055068	5.5814	5.70537	6.27565	6.60243	5.03919	6.88431	7.4862	0.993684	5.17206	13.4717	11.7527	6.18954	10.5653	8.11521	10.1226	5.07595	4.99352	6.42221	5.35994	13.2406	6.16409	11.2694	10.1854	4.52994	7.89943	10.6382	5.29763	5.93933	4.28275	2.7413	5.80266	5.79444	6.26097	5.62736	5.49211	4.63636
MSTRG.221	PGSC0003DMT400055069	13.6535	13.0604	10.7826	15.9308	10.5474	10.7897	17.02	16.1714	15.4876	10.5416	8.56481	14.3001	14.2129	16.0876	12.6433	21.7298	19.6802	26.9105	14.4416	7.25658	8.87651	14.481	14.6717	13.1761	21.9959	33.8476	20.5895	13.079	15.5598	9.49301	15.5311	13.0106	13.5637	23.0596	12.9212	18.4555
PGSC0003DMG400021367	PGSC0003DMT400055063	0.688773	0.410286	0.445902	0.690973	0.694585	0.515908	0.336789	1.06834	0.652357	0.844066	0.464202	0.719552	0.234313	0.888766	0.916903	0.633193	0.631756	0.42506	0.519348	0.981204	0.566046	0.458166	1.02952	0.65527	0.922185	0.843173	0.762398	0.968563	0.335733	0.181345	0.775744	0.746823	0.41764	0.709509	0.312087	0.847238
MSTRG.225	PGSC0003DMT400055060	11.0568	10.5375	16.0713	16.2487	19.0593	13.6384	16.1056	11.3996	15.4153	9.16201	4.48896	10.4475	21.6685	22.163	19.1636	20.4795	18.0134	18.2406	20.8398	5.88157	10.5017	23.2308	19.9758	18.3609	15.0535	9.22949	17.5333	11.3909	17.6151	17.0076	16.9312	21.3516	13.1353	14.0624	14.5181	9.47006
MSTRG.224	PGSC0003DMT400055061	27.1075	37.4593	32.9982	41.3623	42.6351	44.8887	37.0919	32.5997	33.5317	21.6959	23.2574	40.3576	0	37.2218	35.655	51.7694	46.6012	54.2671	35.7984	22.5031	25.3564	33.012	28.0342	27.2066	46.6897	49.7815	39.4496	28.0846	33.8048	37.4009	41.7306	46.3157	36.9706	34.1109	49.4333	37.522
MSTRG.226	PGSC0003DMT400054965	9.60201	17.1024	26.7981	8.51432	29.341	20.2041	36.9487	100.535	64.7289	36.7406	46.9266	25.7795	6.74245	11.5069	25.3118	14.0799	5.81656	12.0486	2.55378	52.9474	44.0852	7.5362	23.2867	9.52711	7.86167	83.3954	3.79008	8.46261	7.59236	13.7311	11.8695	10.6812	17.0198	68.1133	49.5373	126.43
MSTRG.223	PGSC0003DMT400054969	507.122	373.659	452.62	680.554	708.859	591.295	589.915	426.289	519.526	318.936	296.238	422.758	845.605	858.885	550.163	732.367	915.976	683.391	654.492	282.907	367.537	744.234	703.932	553.348	740.325	348.79	621.959	460.173	702.1	895.07	617.296	649.723	603.563	639.622	567.546	410.137
MSTRG.227	PGSC0003DMT400054955	34.5797	32.1673	28.6238	23.9542	21.9321	25.5792	24.6736	24.2303	23.2221	28.4676	23.9816	34.6118	20.6042	21.611	22.9276	27.5179	21.6675	26.9618	24.6528	24.6699	21.546	25.3446	24.6408	24.314	21.0462	21.6033	21.5795	25.7792	24.2121	24.921	24.5518	22.1379	21.2645	20.205	23.4537	22.6497
MSTRG.230	PGSC0003DMT400055058	31.5392	21.8684	10.9659	15.4819	7.74472	12.4575	6.45622	5.24015	9.84979	9.59501	11.6753	28.3731	11.5918	8.56286	8.73036	11.7627	11.9503	12.0054	19.0567	10.2305	5.82126	9.91808	11.4345	8.2864	12.271	13.2872	11.0106	19.6731	16.2046	10.2102	11.2613	7.24205	9.08907	9.58475	6.8533	6.52932
MSTRG.232	PGSC0003DMT400055055	37.8486	32.6238	31.118	50.0607	48.9113	47.6592	40.3828	26.4217	47.4228	32.8485	10.256	26.2847	46.0339	52.0021	50.5449	33.0516	35.7	42.1078	32.6939	27.767	31.7795	51.5101	43.956	53.4599	33.9781	27.8349	38.0721	31.327	28.8498	26.1118	51.3332	56.5147	44.9147	41.3341	42.9683	38.0976
MSTRG.233	PGSC0003DMT400054952	19.844	18.5647	39.9329	23.5161	15.9803	20.9837	19.7391	25.9832	23.863	48.6252	47.4228	20.6776	18.2507	16.5119	22.092	17.5189	16.8569	19.2619	17.0499	45.3703	50.2276	20.9849	22.3632	18.2662	19.7657	24.7813	18.822	19.2462	19.8159	17.5262	25.2987	20.1923	18.571	27.9955	23.1823	26.6627
MSTRG.234	PGSC0003DMT400055051	14.8484	28.0284	6.6824	0.232393	0.218519	0.102526	0.620727	1.43109	0.290233	16.469	12.8328	33.9295	0.61916	0.434679	1.41089	0.255585	0.365502	0.081516	0	19.002	22.1295	0.996643	0.889003	0.710002	0.098172	2.04681	0	11.6988	8.102	12.8297	0.219519	0.855939	0.338938	0.358058	0.689755	0.974218
MSTRG.235	PGSC0003DMT400055050	16.3923	27.9126	3.77444	0.559542	0.22089	0.021323	0.577841	1.08322	0.074759	6.5816	8.645	32.2837	0.282043	0.771149	0.684863	0.135803	0.027481	0.116414	0	8.31709	10.5224	0.900677	0.883516	0.474815	0.144109	1.59682	0	9.14053	6.73714	9.73482	0.17373	0.394024	0.300932	0.21573	0.300393	0.542836
MSTRG.236	PGSC0003DMT400055049	13.3567	27.2324	5.50988	0.026287	0.415487	0.377962	1.71832	3.3428	1.22419	11.2837	11.4611	31.9981	1.37097	0.944452	2.81441	0.980728	0.230332	0.819257	0	10.8684	13.885	1.63855	2.54484	1.10332	0.5425	3.32965	0.106656	5.23325	4.20655	8.1582	0.315879	0.880183	0.639737	1.18639	1.36862	2.52546
MSTRG.237	PGSC0003DMT400055046	3.46779	6.55052	0.797914	0	0.077419	0	0.056056	0.631953	0.087139	1.52854	1.71842	8.71094	0.056499	0.033254	0.341221	0	0	0	0	1.95246	1.8815	0.529554	0.220287	0	0.199514	0.232112	0.293834	1.36373	1.55102	1.56952	0	0	0.043679	0.260125	0.044289	0.035516
MSTRG.238	PGSC0003DMT400055045	13.8654	25.3404	4.30845	0.524279	0.434276	0.315728	0.892081	1.13135	0.58321	9.40471	9.27837	30.2668	1.16343	0.975319	0.975043	0.285635	0.162341	0.199482	0	13.9957	15.0706	1.13528	1.2449	0.865052	0.297843	3.77359	0	7.35496	8.40959	16.2167	0.061771	0.238702	0.306435	0.813971	1.00898	2.00212
MSTRG.239	PGSC0003DMT400054949	14.3534	26.2308	4.68579	0.121945	0.215863	0.188528	0.632093	1.30158	0.39823	5.78071	6.31911	30.4134	0.68374	0.793456	2.06558	0.577321	0.114774	0.228474	0	8.9017	12.5483	1.44874	0.863462	0.698208	0.582716	2.59985	0	5.90242	4.29516	7.75589	0.408384	0.268913	0.671654	0.953006	0.605252	0.895489
MSTRG.240	PGSC0003DMT400054948	21.8754	35.6887	4.22277	0.350671	0.228314	0.946965	1.49825	1.56406	0.431538	5.99158	6.13472	35.5979	1.01357	1.19766	2.8011	0.998445	0.071123	0.548591	0	5.2922	7.89554	1.58588	1.31539	1.27773	0.919752	3.08477	0.052694	12.979	6.85676	7.26697	0.460954	0.26486	0.383826	1.5144	0.238276	1.83264
MSTRG.240	PGSC0003DMT400054947	72.8193	107.251	8.08049	0.194028	0.515861	0.887472	2.15894	3.77659	1.22524	13.2877	12.9355	104.512	4.59595	2.26769	3.70287	2.3277	1.019	1.40027	0	17.1319	26.519	4.29721	4.81126	3.9091	1.50136	5.32256	0.332294	36.7267	26.6497	43.3526	1.31246	0.844256	1.67664	1.65086	1.36232	3.00181
MSTRG.242	PGSC0003DMT400055044	6.77612	6.18659	0	0.170305	0.059176	0.366816	0.432205	0.170077	2.09109	0	0	3.2271	0	0.142407	0.791453	0.495494	4.69871	0.032278	4.02527	0	1.3997	0.065979	2.78016	2.41149	0.368729	0.040187	0	0.303294	7.44531	5.58528	8.58453	1.30495	0	0.311368	1.26721	4.82409
MSTRG.244	PGSC0003DMT400054943	4.53516	5.37995	9.17716	5.84283	5.74053	4.8385	3.23054	3.64101	4.55945	9.67381	8.90066	5.91227	5.35881	5.09589	3.73113	4.99347	3.69547	4.90494	9.38587	8.54186	6.83416	5.41513	3.41578	3.67492	6.10493	4.59293	4.88968	7.40243	5.4894	4.92753	5.72887	5.05884	3.83337	4.75083	3.705	4.69791
MSTRG.243	PGSC0003DMT400054945	64.7739	47.576	0	48.8412	8.60504	64.0136	64.4016	87.9368	72.1747	28.7007	0	64.1644	36.9564	38.4129	46.7408	49.4824	26.0226	51.8103	39.1485	25.8872	18.7002	30.2875	44.1237	50.1638	45.0356	54.1184	33.3442	37.3217	0	0	29.8645	54.6146	40.6955	38.8449	67.5355	56.0178
MSTRG.245	PGSC0003DMT400055040	263.34	239.925	406.899	93.7925	80.1761	90.9642	97.1263	123.191	102.61	499.321	418.297	253.299	91.7887	85.1218	100.078	133.226	160.254	165.742	186.979	491.003	507.43	86.8735	99.5004	92.0069	111.216	142.41	92.7388	159.396	136.376	170.438	70.2495	62.078	118.083	76.966	83.7553	98.6143
MSTRG.246	PGSC0003DMT400054941	58.1119	43.7273	41.9371	29.6346	33.1159	36.3991	32.0349	36.2318	38.1126	42.5145	35.2987	57.0251	34.539	29.5605	31.6353	32.5335	26.4403	38.9662	59.8803	34.0315	36.4341	37.1071	37.9986	35.8197	33.7538	37.8484	39.3387	49.0445	34.2489	29.9704	36.5054	33.8843	32.4626	36.0558	29.9908	40.4801
MSTRG.247	PGSC0003DMT400055038	20.9766	25.4065	33.4475	41.4193	39.6425	33.5899	44.8776	34.211	38.8107	53.533	55.624	20.9473	35.3287	36.2634	27.0247	44.3141	25.8349	38.506	29.4867	34.723	31.9304	36.0069	29.5372	19.6436	42.2632	14.5302	35.4107	25.6762	17.8831	16.1534	49.083	34.7191	24.8439	28.3826	36.8828	29.2209
MSTRG.251	PGSC0003DMT400054936	0.202433	0.861069	0.247356	0.372811	0.332853	0.535941	0.498105	0.616017	0.842942	0.521987	0.162513	0.559448	2.4181	0.750455	2.18525	1.71494	1.67118	1.4513	0.151265	0.424354	0.303104	1.11145	0.372813	0.039515	1.29256	0.192135	1.87926	0.155642	0.049307	0.12225	0	0.178991	0.06006	0.875326	2.65138	0.919285
MSTRG.252	PGSC0003DMT400054933	11.862	7.69547	13.6611	7.16876	7.12343	8.16534	4.93145	4.19851	6.90628	16.8364	13.2764	9.8836	3.44292	3.69016	5.14765	0.785028	2.98626	2.15177	6.69148	16.4331	15.8694	5.98459	5.96745	6.10625	4.32437	6.33392	5.04995	2.9275	9.92982	7.41147	5.12185	3.3603	4.74923	7.49896	5.87692	9.9009
MSTRG.250	PGSC0003DMT400055030	25.6071	17.4285	14.8844	15.9119	13.0141	14.468	13.2313	14.6774	14.4455	14.917	18.0519	26.9178	17.0246	11.5196	13.53	24.5274	15.0699	21.0284	22.7589	14.0802	13.883	15.4027	18.6965	9.43677	19.3213	29.5807	17.6041	22.1976	12.9244	18.8084	15.0668	12.0171	16.5398	19.4259	13.0804	16.1247
MSTRG.253	PGSC0003DMT400042356	5.00492	4.38599	6.41729	3.26061	4.02988	3.92624	1.97099	5.41602	5.9971	7.04685	9.55925	4.39482	2.66953	3.09737	3.72283	2.63287	2.06181	2.09002	4.76151	8.33164	6.91567	2.08638	4.01147	7.68399	1.97567	3.90544	1.23149	4.16809	6.20714	5.64044	4.7544	5.40996	4.16087	4.51511	4.41282	7.09247
MSTRG.249	PGSC0003DMT400054940	46.2774	36.3818	0	88.8579	5.36815	85.9629	77.3039	10.8	2.5244	15.814	70.0305	49.6151	62.9729	5.15702	69.0066	16.6652	4.14183	60.6915	1.58621	3.88934	2.68867	4.02803	1.77251	6.42603	3.89551	3.11603	56.568	1.04696	36.909	0	3.74545	20.8872	5.39532	0.845312	2.83966	3.07622
MSTRG.249	PGSC0003DMT400054937	2.59082	0.552872	35.9339	0.993191	1.36159	1.91723	1.80285	2.77858	1.4317	0.896548	1.80125	0.666611	2.22978	0.865223	0.332869	0.946875	0.253486	1.14905	0.152918	0.191384	0.361392	0.278597	0.555093	2.08841	0.357172	0.634348	0.85753	0.975702	0.294871	3.44236	0.654339	0.979912	0.287816	0.893582	1.94152	0.555068
MSTRG.255	PGSC0003DMT400042229	9.03147	11.3063	22.3634	22.7435	18.8563	19.1279	14.1481	20.4611	17.9867	29.7595	26.1051	9.50978	11.0939	18.2892	17.3719	18.286	17.3899	15.7192	9.12761	28.9728	25.5073	12.8504	18.4271	17.7201	11.4851	20.9922	22.1525	6.25079	7.4832	9.07722	15.7665	22.1163	17.027	17.5365	19.2506	17.5311
MSTRG.254	PGSC0003DMT400042351	35.9807	47.5755	71.9111	231.985	300.078	265.259	265.123	346.492	265.453	190.622	195.095	42.5876	184.715	240.853	302.149	228.997	187.173	179.098	25.3884	121.049	98.1319	180.035	266.083	296.969	158.15	234.313	162.832	31.9568	27.6951	33.9227	245.321	291.137	300.661	222.468	377.212	379.559
MSTRG.258	PGSC0003DMT400042225	4.45656	6.99928	1.67704	1.7931	0.426672	2.23445	1.31389	1.08756	1.31518	1.11841	2.14601	4.79782	2.08873	1.7184	2.39783	2.45571	1.49959	1.74082	1.00175	1.03527	0.398434	2.24777	4.24236	1.42469	1.90495	2.57498	2.62042	5.32477	3.33429	1.50751	3.04074	0.825325	1.70681	2.6369	2.30339	2.2253
MSTRG.259	PGSC0003DMT400084983	2.98969	2.65008	2.54023	1.92744	2.48745	2.78297	1.62934	0.917013	1.37421	2.99402	1.85669	2.20983	1.66812	1.82568	1.66948	1.59162	1.1365	1.81364	1.74033	2.62223	1.53095	1.89302	1.67343	1.82437	1.94317	1.22198	1.74925	2.64559	1.96173	0.74471	2.805	1.85617	1.42763	2.11076	1.30419	1.94298
MSTRG.261	PGSC0003DMT400085903	5.53224	7.61859	10.8748	3.72096	4.80235	4.32567	3.40687	4.00911	3.45403	4.24142	4.04456	9.02083	5.70621	4.7633	3.4447	4.0335	2.7514	2.75909	7.13306	4.18046	3.95811	3.20582	3.97178	3.87614	4.42554	5.68172	1.96044	5.56288	8.84355	9.59508	4.3779	4.1078	4.62716	2.25394	3.21505	2.91368
MSTRG.260	PGSC0003DMT400042222	22.5314	21.759	26.3366	93.2343	91.6379	90.9659	97.8279	78.8462	82.8598	30.072	18.896	20.0515	84.3266	112.334	94.8765	64.6006	62.3052	60.7176	32.759	18.6873	25.8238	102.058	97.4932	95.2649	60.4802	46.1394	52.7618	27.508	39.0629	33.8496	92.5391	115.367	87.8983	54.5486	77.1333	58.0961
MSTRG.263	PGSC0003DMT400042221	0	0	0	0	0	0	0	12.7635	3.5498	0	0	0	0	0	0	0	0	0	0	0	4.26534	0	0	0	0	7.13845	0	0	0	0	0	0	0	0	0	20.2741
MSTRG.264	PGSC0003DMT400042342	6.68029	9.1473	16.3621	10.0585	8.17586	5.74705	8.43981	7.41277	5.33579	15.9707	24.1643	3.9202	2.63099	3.15756	8.31095	2.79623	6.22999	8.76855	4.48735	15.4582	16.4192	3.02104	5.28007	0	3.73174	5.32751	2.95897	6.47457	0.293215	12.9975	9.27407	7.71917	10.4096	2.34425	7.73201	3.38023
MSTRG.262	PGSC0003DMT400042347	5.262	6.5134	22.2972	18.6289	16.7553	18.3718	13.9852	19.1366	16.2275	35.1248	28.2488	6.88218	10.516	11.873	14.656	7.2621	8.25585	7.93782	8.36279	26.4813	26.382	12.5223	13.5658	19.7485	7.54636	14.7913	8.61167	7.01245	4.63432	0.731016	18.7348	17.5543	16.0112	13.8024	16.8321	20.1121
MSTRG.266	PGSC0003DMT400042336	2.08358	3.37618	0	0	0.86126	4.59825	1.38743	0	1.50436	0	0	0	7.46279	0.980721	0.629409	0	5.74109	2.64442	5.47985	1.35941	0.775425	0.920063	0.482984	0.979852	0.275219	5.26779	0	3.23057	5.71366	3.61351	1.95885	2.59727	1.29633	0.22816	5.89477	0
MSTRG.267	PGSC0003DMT400042218	7.99894	4.86762	5.12705	2.28294	2.35631	2.28287	1.84494	2.40833	2.20304	5.09447	7.63957	8.66735	2.67664	2.16486	2.85721	2.76382	2.22394	3.36896	6.60857	4.92736	4.83667	3.48723	3.77394	2.03114	3.08358	4.35222	4.08969	5.67212	5.71231	4.64762	2.74871	2.18153	2.8567	2.42537	1.02625	3.09782
MSTRG.270	PGSC0003DMT400042364	5.29021	3.22815	3.62904	3.99641	3.23243	3.65556	2.19709	2.72967	2.97796	5.13792	4.18017	5.61523	2.42484	1.78334	2.2712	1.94103	1.82532	2.88684	4.13399	4.56481	5.34492	2.64335	3.33017	2.6605	3.21193	3.7509	3.09976	6.63927	2.16698	1.8204	3.97762	1.88647	1.7557	2.7457	2.64904	3.67772
MSTRG.273	PGSC0003DMT400042215	23.0979	18.615	19.3732	29.3713	26.5613	32.2256	39.8946	23.5641	32.6163	18.22	23.1221	22.8736	24.0993	37.6007	33.3888	26.3948	25.4146	35.0259	17.7754	27.1066	34.5764	29.8722	27.5177	42.5282	27.9886	28.5763	25.7597	24.8994	29.19	34.641	38.4403	35.9109	34.7715	19.1809	29.0269	21.4695
MSTRG.274	PGSC0003DMT400042333	0	0	0	0	0	0	0	0	0	0	0	0	0	0	0	0	0	0	0.027925	0.013019	0	0	0	3.20463	0	0	0.944641	0	0	0	0	0	0	0	0	0
MSTRG.275	PGSC0003DMT400042331	14.6257	9.17569	5.08009	5.77128	3.64203	5.49675	5.62679	3.3613	3.32821	5.91467	6.45715	8.87291	2.69676	4.99324	5.01321	5.43387	4.69039	5.17093	10.2418	7.22439	6.72861	5.18324	6.27979	4.29356	3.82177	5.89545	5.11976	8.67098	9.00399	10.6537	5.14479	5.38914	5.44374	4.73645	4.28463	4.0673
MSTRG.277	PGSC0003DMT400042213	3.83914	2.42004	1.96358	5.56858	5.54568	6.07636	2.06819	6.04102	3.77523	6.60981	6.9556	4.82659	5.6937	2.33661	4.0018	16.0043	8.62359	11.0746	4.5116	5.64259	3.13898	2.41591	1.93392	2.69493	7.67286	1.29969	12.5662	1.96666	3.27345	5.45065	3.49163	6.34389	5.82801	7.4544	5.63182	7.17078
MSTRG.276	PGSC0003DMT400042214	225.626	185.561	193.735	209.519	185.617	219.023	193.347	198.662	221.108	176.735	172.333	226.441	285.111	217.945	221.256	264.432	221.56	271.59	244.419	191.452	194.765	276.799	252.847	179.553	267.922	297.69	206.034	179.881	185.116	299.17	196.994	184.166	234.103	252.121	194.776	205.995
MSTRG.279	PGSC0003DMT400042209	0	6.39365	0	0	0	3.34858	0	0	3.18002	0	2.6446	5.60525	0	3.54449	2.42878	3.54817	0	2.35358	0	1.76669	0	0	2.99394	0	0	0	0	0	0	0	4.95888	1.95542	0	2.14559	0	0
MSTRG.281	PGSC0003DMT400042206	21.4567	21.8064	23.0382	17.3865	19.1484	17.875	9.38479	16.6355	15.9111	18.6886	20.143	20.8829	16.6958	16.5995	13.2861	13.8491	14.0133	13.6302	20.0602	23.0741	19.671	14.0553	17.2304	13.7958	16.8901	20.2047	15.9616	19.3653	18.5727	19.9832	13.3007	19.0294	17.5794	12.7996	15.1441	21.6758
MSTRG.282	PGSC0003DMT400042326	41.9338	37.9793	70.2336	150.706	131.182	137.908	154.997	163.926	161.684	81.4754	93.1949	36.048	96.6178	128.288	126.303	84.2795	66.7353	81.6722	43.6557	77.1038	73.348	101.646	97.1533	137.312	68.2373	92.6188	71.991	35.1519	39.1444	32.7445	139.277	142.164	127.14	88.106	134.815	159.538
MSTRG.283	PGSC0003DMT400042325	82.0614	72.6093	76.3641	51.2961	43.0224	54.5684	36.7028	40.5743	37.538	53.9297	59.1326	90.2992	48.155	47.5187	48.3722	40.3669	37.5092	42.0015	81.1805	49.1753	56.9744	44.9302	48.2674	45.772	31.7991	55.0128	33.7267	65.1028	75.4946	89.9642	45.2068	52.9159	58.3199	30.2276	28.2836	36.4023
MSTRG.285	PGSC0003DMT400042202	25.7579	12.6894	19.2758	16.0095	18.7751	15.4081	8.08959	9.29972	11.4215	9.76074	14.5714	14.1632	14.6943	11.1937	15.726	16.0585	17.9132	17.1378	12.8087	10.5735	10.8341	12.1948	13.5351	12.6463	18.7162	16.5943	0	11.1847	22.6063	32.2894	15.2073	14.0309	19.1385	12.7576	7.80236	14.9415
MSTRG.284	PGSC0003DMT400042203	57.6286	39.9932	15.2836	10.8256	12.2854	11.4635	13.8337	12.3789	12.6618	11.1007	10.8247	46.2505	16.8313	10.2914	14.6217	26.126	24.5523	30.2564	39.6933	12.2302	10.3651	16.4619	17.6547	10.5389	24.6479	29.0827	18.833	36.0704	22.6794	26.8993	12.6826	10.1	19.0917	15.3199	11.5415	13.9576
PGSC0003DMG400016372	PGSC0003DMT400042194	0	0	0	0.33763	0.665177	0.576562	0.313598	1.28004	0.621069	0	0.23801	0	0.135852	0.210026	0.476367	1.01564	0.376862	0.274527	0	0	0.109103	0.336667	0.481299	0.213064	0.442624	0.354339	0.250146	0	0.088444	0	0.348327	0.234865	0.288292	0.323861	0.535576	0.70993
MSTRG.286	PGSC0003DMT400042324	1.72784	0.841951	0.850969	1.40286	1.06287	1.42085	0.779111	0.804695	1.19709	0.958533	0.937895	1.07256	1.20966	1.34378	0.893677	1.12944	1.32094	1.07943	0.886632	0.867717	0.748792	1.20974	1.50717	1.10224	1.41167	1.7524	1.20695	1.53718	1.20924	0.617975	1.51347	1.42507	1.34714	1.07906	0.807958	0.973444
MSTRG.290	PGSC0003DMT400042191	1.49348	1.24741	2.07058	0	0.500868	0	0	0	0.344664	0	2.91462	2.18685	0	0.387255	0.122453	0	0.271566	0	0	0.763245	1.79005	0.224525	0.512191	0.73591	0.319267	0	0.496549	1.68873	1.76074	1.95732	0.361502	0	1.01731	0.151461	0.10315	0.614183
MSTRG.289	PGSC0003DMT400042189	1.80615	2.20547	9.68218	0.604151	1.69265	0.857644	0.70852	1.06027	0.566646	12.0327	19.186	3.15883	1.47365	1.8159	2.18362	1.12188	1.12538	0.913373	1.24971	10.3612	11.1619	1.94508	2.13864	0.645918	1.10842	1.28712	1.31085	2.41103	0.927983	1.74306	1.63539	1.06819	0.712738	1.31598	0.967315	0.927435
MSTRG.292	PGSC0003DMT400042319	0	0.322043	0	0.314061	0.326824	1.36008	0.136522	1.33679	0.484991	0.100636	0.248024	0.116833	0.758393	0.398426	0.051219	0	0	0.404388	0	0.102256	0	0.265216	0.461559	0.12566	0	0.401722	0.406001	0	0	0	0	0.418216	0.195275	0.20658	0	0.494866
MSTRG.293	PGSC0003DMT400042362	8.04332	3.54236	5.32169	7.19224	5.36483	9.072	9.58111	13.6711	15.9891	2.95876	6.37448	6.09674	4.46231	7.03635	10.4376	8.36256	5.96024	5.0206	5.69453	2.96978	4.20198	4.18669	7.71879	3.56833	4.97603	10.3506	4.99035	2.3648	3.95198	3.9697	8.32399	4.40754	7.54758	6.41748	8.93792	9.50526
MSTRG.299	PGSC0003DMT400042274	12.1306	13.694	27.6731	9.08822	13.9245	12.8702	0	8.88193	0	0	0.091966	10.4347	9.90636	0	10.0537	0	10.3144	0	0	0	0.025787	13.8959	0	0	13.3486	0	8.7306	0	0	0	0	0	0	0	12.6294	9.22643
MSTRG.301	PGSC0003DMT400042270	0.963701	2.12631	6.50735	17.88	14.9179	14.9337	10.3703	11.9557	9.82665	11.7715	8.11223	1.19496	8.5772	12.1232	8.93507	17.9929	14.102	11.7737	2.38734	8.78042	8.12774	6.79785	12.736	11.3186	12.1752	4.13427	16.183	1.01654	0.773759	1.13366	12.4095	15.7737	13.0441	13.6029	15.4352	14.7347
MSTRG.300	PGSC0003DMT400042188	14.0702	16.2738	40.3108	31.8267	29.784	34.3515	37.7193	33.6116	31.9249	47.8491	38.1015	16.8278	33.0291	35.3761	29.0022	35.5919	27.4484	28.5434	16.5291	32.8209	35.7854	35.3473	32.8203	26.3997	29.6267	20.4811	28.0914	7.59516	18.3618	17.4128	28.0032	36.0289	29.7084	31.5162	32.4949	32.4495
MSTRG.302	PGSC0003DMT400042265	2.06291	1.87394	0.121915	11.8535	2.70632	12.589	21.3805	3.06372	3.2451	0	3.37153	15.2195	0.527722	0.060191	0.818267	0	12.4284	1.69104	0.015259	0	0.015837	1.29949	0.017157	2.38652	1.7756	0	0	8.48853	2.06729	0	0.064731	0.016048	2.48371	3.18365	19.2926	0.129305
MSTRG.303	PGSC0003DMT400042261	38.6603	26.9098	36.9101	38.3295	29.9936	36.0064	31.672	32.3271	28.3245	27.8748	24.4259	39.952	34.7762	31.5989	36.437	42.8272	34.5842	38.3356	39.2056	23.9301	26.3916	30.7437	30.9412	26.4935	36.13	58.8483	31.7077	26.9991	30.8129	35.16	33.4309	33.167	42.0335	32.3605	31.5907	31.7827
MSTRG.298	PGSC0003DMT400042276	465.942	484.886	416.699	327.486	305.761	319.465	378.348	366.259	366.757	425.976	422.586	479.675	345.607	315.087	354.964	382.968	365.546	502.654	434.506	421.725	389.984	330.392	316.654	309.078	362.825	480.662	341.985	341.798	318.644	410.6	289.354	271.053	371.455	284.235	337.128	325.629
MSTRG.305	PGSC0003DMT400042258	50.0527	63.8222	34.9237	78.8578	76.5574	64.7075	36.6029	21.9645	24.3886	9.36509	8.92356	49.3795	78.8882	96.0633	46.7923	67.8102	56.3302	50.4979	94.7504	13.3198	16.583	66.2948	43.9421	68.4012	70.1954	18.0075	67.7707	92.2997	119.732	85.9497	67.3234	90.2628	58.5143	39.2049	37.2322	25.2893
MSTRG.304	PGSC0003DMT400042183	159.473	181.103	239.137	335.832	307.122	336.874	318.075	320.958	197.948	262.565	242.402	196.355	217.702	306.989	298.037	212.02	227.384	223.691	180.905	257.97	254.074	140.695	134.401	400.97	199.126	234.767	281.69	162.509	234.428	268.472	344.108	346.877	283.687	162.562	306.212	337.118
MSTRG.308	PGSC0003DMT400042255	1.86997	2.98173	11.3481	11.6721	10.179	11.0565	13.1028	12.914	13.6748	11.3791	21.7521	2.47689	7.89461	9.51312	9.89348	14.459	12.9816	10.5396	3.8558	13.2067	9.30012	6.59624	9.02345	7.38483	11.6405	11.1027	10.8999	1.78515	2.14465	1.70759	7.16786	12.3465	11.8187	12.0038	16.0896	14.4348
MSTRG.306	PGSC0003DMT400042256	19.8887	11.6846	22.9436	35.0008	5.08043	4.59373	17.8282	6.93371	3.37728	14.2879	6.91467	14.4285	5.74441	10.5037	5.89067	6.52009	16.1013	6.9859	9.80182	4.3601	2.28967	2.62476	3.31965	2.59375	2.73596	13.2182	8.53692	17.2597	4.88021	32.5966	8.17219	12.2968	2.72552	8.09163	3.80462	4.99089
MSTRG.310	PGSC0003DMT400086906	13.2104	18.0568	32.9727	26.9476	29.7982	31.3965	19.2309	21.925	22.4104	35.6957	37.0604	17.6234	20.3957	23.7649	29.8468	16.8562	13.7548	15.5115	23.7854	38.5284	45.9701	27.7936	31.8012	45.8398	13.5351	19.3205	16.2908	23.0284	20.042	16.3082	28.525	33.4924	31.8199	24.5009	24.127	26.1479
MSTRG.309	PGSC0003DMT400042178	7.49256	8.83706	6.06026	24.3703	22.7371	26.4123	16.1125	19.924	21.9792	6.63613	7.49099	9.38505	18.5362	21.6598	18.6664	33.4861	27.1181	22.4611	8.6002	6.37473	6.69863	14.1573	18.5684	15.5714	25.7415	11.9861	28.0829	7.92893	5.6875	4.80701	24.129	25.6298	21.4813	27.7269	23.466	23.5598
MSTRG.312	PGSC0003DMT400042360	0	0.702464	0	0	1.23514	1.42273	0.41562	0.458324	0.135844	0.479006	0	0	0.250322	1.48838	0.093176	0	0	0.267531	0.574035	0.919299	0.609263	0.435829	0.409276	1.28499	0.41234	1.14092	1.51971	0.290471	0	0	0.62874	1.63746	0.181674	0.470405	1.08283	0.160565
MSTRG.311	PGSC0003DMT400042253	82.7108	87.3344	55.3347	27.2507	19.6002	29.9942	18.0502	26.2011	27.4832	57.8554	61.78	79.1662	22.9527	21.5582	24.299	35.4431	25.3153	36.2277	59.8212	52.4521	48.4656	29.7313	30.6186	22.0674	27.2073	48.9373	33.2254	70.6826	46.9065	34.7222	22.2631	15.2788	27.0523	24.9857	18.4847	27.9664
MSTRG.315	PGSC0003DMT400042251	8.51293	8.5856	3.29863	6.57044	7.30243	9.29009	8.17579	6.79112	8.27483	4.34742	7.80119	10.5604	4.75221	8.19153	8.22479	5.70492	4.01189	6.98387	7.052	4.58999	4.54337	6.22039	6.2974	6.56077	7.31249	8.75791	6.30801	7.81725	8.30578	7.34469	6.98911	7.23136	7.89853	7.1776	8.36455	10.0206
MSTRG.318	PGSC0003DMT400042164	7.06105	7.96115	12.3782	11.0272	11.2594	12.418	10.0837	10.5271	10.5154	7.69374	6.40033	5.40496	12.5322	14.8225	13.3632	7.98436	7.4586	7.66717	9.45056	7.00692	8.96167	11.383	11.4595	10.8132	5.00845	5.37698	7.30023	5.82397	11.9227	15.851	11.8102	10.2486	10.94	8.42421	9.1389	8.45073
MSTRG.319	PGSC0003DMT400042248	18.4212	19.0999	12.4092	11.4377	11.3641	11.4216	10.0068	8.53754	10.7388	15.685	10.4152	26.069	11.3176	8.56613	9.70826	12.1337	8.31492	12.2462	25.2083	13.6566	11.2879	15.1651	15.029	8.5283	13.5091	10.7735	13.1987	15.2134	13.892	22.5469	9.94793	9.02124	9.95987	7.0152	8.26304	8.78408
MSTRG.320	PGSC0003DMT400042247	41.4877	50.5227	42.8078	43.2045	39.2103	37.1334	39.238	41.7184	45.9177	43.0614	45.6273	45.8727	37.8918	39.6242	41.4908	36.669	35.0618	39.163	31.3489	35.0995	40.9089	44.8357	47.5397	41.1562	33.5951	37.0852	30.0319	33.7845	33.9789	37.8851	36.0361	39.8724	42.2136	38.0737	38.5551	37.3195
MSTRG.321	PGSC0003DMT400042246	12.4406	14.4543	38.6679	40.4043	37.8926	42.1011	35.6139	40.7073	42.2555	46.9019	50.8474	15.3885	24.2364	32.1321	1.65393	27.8139	19.1033	20.4727	15.4046	43.2843	40.9501	16.8424	35.0048	41.1393	21.406	24.5337	21.0847	13.9403	12.7014	10.5823	42.2058	41.6256	36.5915	27.9116	36.5283	30.3571
MSTRG.322	PGSC0003DMT400042244	21.2254	16.9452	21.1857	32.3027	27.8316	28.3948	21.0068	20.934	22.8106	18.1295	16.5581	22.8247	18.9104	27.9582	18.9203	14.3075	10.8658	15.9243	23.0301	18.7538	18.1329	26.6261	27.8783	50.1874	11.8103	16.8798	20.3029	24.292	22.3046	1.64307	37.6515	38.832	32.1369	14.0859	15.1934	17.7443
MSTRG.327	PGSC0003DMT400042238	16.028	16.0884	23.0893	91.4348	104.63	91.8733	67.1586	65.6899	74.4658	29.7866	23.4413	17.2608	72.5193	96.1073	80.7963	60.4682	52.1506	49.778	23.9185	20.5378	27.5843	73.3688	74.4361	89.4576	46.0027	38.9618	54.0643	17.9574	17.9392	12.2737	88.2971	103.795	76.0062	58.3002	71.7798	67.3983
MSTRG.329	PGSC0003DMT400042233	257.683	192.039	123.978	88.2125	88.0415	105.414	96.0081	99.6658	110.919	103.783	138.339	192.209	128.197	87.933	106.625	119.445	106.649	130.989	237.759	119.664	114.688	120.669	117.01	80.443	108.162	141.33	121.293	157.563	163.083	302.081	89.3387	79.5489	111.836	133.778	93.2127	97.3288
MSTRG.334	PGSC0003DMT400027792	0	0.861684	0.993096	0.475241	0.677305	1.33925	2.93156	2.57732	2.98868	0.690308	0.942485	0.461302	0.627914	0.977821	0.749904	1.16489	0.703189	0.946361	0.283763	0.542388	0.271293	0.573543	0.801727	0.429304	0.798337	0.964863	0	0.582152	0.323468	0.150086	0.682108	0.662203	0.594531	1.12534	1.5201	3.55276
MSTRG.333	PGSC0003DMT400042357	0.71358	0.608926	0.52339	1.05439	0.799367	1.37215	2.96852	3.50639	3.32115	0.687934	0.707728	0.76188	0.530121	0.971	0.655118	0.761579	0.549543	1.02903	0.251181	0.402436	0.127723	0.379527	0.230662	0.543568	0.642397	0.662563	0.694761	0.139008	0	0	1.55683	0.948024	0.480322	1.12223	0.90291	3.62029
MSTRG.332	PGSC0003DMT400042158	0.888904	0	0	0	0	1.50436	0	0	0	1.43051	0	0	0.746213	0	0.333485	0	0	0.28713	0	0	0.001909	0	0	0	0.506777	0.186816	0.008394	0	0	0	1.18726	0.002942	0.66585	0	0	0.940958
MSTRG.335	PGSC0003DMT400027815	0.127517	0	0.228436	1.54331	0.839293	1.53495	0.711349	0.792789	1.35796	0	0.253341	0	0	0.529802	1.59864	0.923762	0	1.49685	0.583625	0.60487	0.199235	4.30801	10.7183	1.36066	2.50836	3.67262	3.54803	0.596482	0.150618	0.681799	3.86559	1.38872	7.68214	0.23301	2.4098	2.12753
MSTRG.330	PGSC0003DMT400042160	58.64	62.3904	72.0597	137.853	132.548	138.986	126.757	114.87	136.709	81.349	71.283	55.8178	86.1119	112.408	106.309	89.99	94.0384	83.9396	51.7373	67.0641	71.17	116.296	138.029	126.929	81.39	84.8642	73.5858	43.7901	47.8719	38.8163	130.674	144.046	127.174	91.2171	121.825	120.297
MSTRG.338	PGSC0003DMT400027810	17.0257	11.7229	10.4584	12.5417	6.73011	11.0911	10.8821	7.84334	9.98528	6.00648	6.71842	17.0859	11.5803	9.45905	9.83041	15.3611	11.0879	17.2702	12.2774	4.95938	5.94048	9.88462	10.9161	8.20441	14.1197	16.7161	13.378	11.8682	13.7107	11.5082	10.7368	7.86594	9.5309	10.3618	9.65103	9.33935
MSTRG.339	PGSC0003DMT400027809	2.87254	6.84255	6.39218	7.17903	7.51301	7.38775	8.73649	5.52507	6.48418	5.43034	3.2208	2.96982	4.58641	6.56641	3.82538	11.5911	5.65145	5.46172	5.82279	3.82608	4.75803	6.68491	5.26173	6.08807	9.53008	2.13948	9.33282	5.0166	3.22018	3.12762	7.67946	10.3134	5.22511	8.64446	10.7956	6.82672
MSTRG.341	PGSC0003DMT400027786	20.0714	20.5333	24.1666	29.803	26.5065	31.1273	29.0947	32.508	32.0828	27.6651	26.547	20.5524	15.2547	24.8636	29.6467	11.7498	16.3454	18.3932	19.4248	22.7485	22.4	19.5946	25.9835	38.5466	13.2916	17.0302	14.9048	18.161	17.0588	16.1893	32.8859	38.8501	29.7646	19.956	24.0418	27.8652
MSTRG.342	PGSC0003DMT400027805	13.7708	13.9715	24.8865	21.3184	18.2479	24.6553	20.2631	19.6354	17.2021	28.862	28.1738	11.1298	14.433	18.7289	20.4964	18.475	17.7525	20.3097	11.9483	25.0557	28.7548	17.9033	20.5332	28.3452	15.0078	19.9872	15.8383	11.905	11.0936	12.2785	22.4447	25.7579	20.0617	15.9286	18.0421	18.1193
MSTRG.346	PGSC0003DMT400027785	39.2128	27.4548	19.171	20.1536	15.9596	20.8214	13.7409	15.3382	15.5017	7.39184	7.048	38.1644	19.7256	15.9695	13.9963	15.0624	16.365	16.9087	34.2321	7.01735	7.28614	17.3997	16.5487	15.1597	19.9692	22.7714	21.1869	35.5071	36.5894	28.5152	16.5759	16.2814	19.3003	14.9898	13.9803	13.9712
MSTRG.348	PGSC0003DMT400027783	21.0745	26.0642	12.0202	3.29393	4.77595	5.50725	14.1954	14.7098	18.2194	7.02671	17.7832	29.5151	2.97536	2.60022	4.13971	3.22711	2.91786	3.98632	4.31651	12.0967	9.71415	2.60643	3.58936	0.97244	2.97459	6.12521	3.79439	10.3839	7.12555	24.8275	3.45372	3.62786	5.63212	10.6036	11.9122	17.0098
MSTRG.379	PGSC0003DMT400027172	0	0	0	0	0	0	5.43207	0	1.37128	0	0	0	0	1.53202	2.09107	0	0	0	0	0	2.74195	0	0	0	0	0	0	0	0	0	1.38885	0	2.78703	0	0	1.63893
MSTRG.378	PGSC0003DMT400027174	12.6472	21.9176	132.128	51.633	74.6272	51.5046	24.1624	46.6475	34.8927	164.943	138.209	19.451	25.4524	40.3776	27.2191	33.0392	30.4766	23.7774	24.3083	159.287	198.38	27.4869	33.4167	43.0456	33.3609	37.4554	25.7819	21.9534	24.952	23.5499	43.8713	54.8472	36.5914	45.7149	37.5362	51.1193
MSTRG.380	PGSC0003DMT400027210	3.52874	4.49469	2.74402	1.82481	2.23585	2.53554	5.18972	6.81376	9.6636	2.19706	4.08114	5.02979	0.957079	1.05789	2.08053	1.97016	1.05494	2.33685	1.89505	3.04307	2.32863	0.781867	1.04012	0.679928	0.979296	3.07112	0.97385	2.41791	1.288	2.6908	2.07475	1.8463	1.95116	3.04729	3.97914	5.47772
MSTRG.381	PGSC0003DMT400027205	0.201372	0.118915	12.8983	0.141667	0.068352	0	1.62555	0	13.1518	12.0061	0.634574	0.229356	0.900472	0	0.0884	0	0	0	0.583373	0.578694	6.54336	0.58494	0.35906	0	4.93783	0.928794	0.742635	15.1229	0.939008	0.353613	0	0	0.16339	0.05557	0.106572	0.17695
MSTRG.382	PGSC0003DMT400027201	0	0	0	0	0	0	0.438769	1.00859	1.16872	0	0	0	0	0	0.041976	0	0	0	0	0	0	0	0	0	0	0	0	0	0	0	0	0	0	1.13864	0.34907	1.14724
MSTRG.383	PGSC0003DMT400027199	0	0.310432	0.196615	0	0	0.470757	12.3495	11.9565	41.3926	0.835864	1.06062	0.85692	0.510863	0.187926	0.497259	0	0.294769	0.722332	0.728148	0.232617	0.038463	0.022236	0	0.193913	0	0.183815	0.130184	0	0	0.066656	0.070172	0.165601	0.558022	10.9995	4.22827	24.8452
MSTRG.382	PGSC0003DMT400027202	0.336269	0	1.94584	0	1.4307	11.1949	85.6783	102.088	132.226	0.632986	3.2563	0	0	1.47077	15.9944	0	0.812103	0	0	2.17843	0	0.307359	3.4245	2.17305	0.236418	0.445092	1.05452	0.782287	0.488342	0.305741	0	0	7.83873	102.644	51.7813	215.925
MSTRG.382	PGSC0003DMT400027198	0.157652	0.709735	2.24609	9.02613	1.63559	4.60052	15.0057	36.8216	46.3796	0.279372	1.67568	0.672552	5.48831	4.55376	2.09923	0.847847	0.356389	1.34739	1.00219	0.794485	0.309581	1.78263	2.4153	2.40973	0.120245	3.52982	0.13636	0.189344	0.331704	0.155504	4.23658	7.76692	2.56239	21.6965	22.3279	42.5498
MSTRG.387	PGSC0003DMT400025411	2.79899	3.36863	3.30342	11.0469	8.72844	22.504	97.254	48.5397	100.564	2.36296	3.8425	2.03726	6.49913	8.88613	4.00265	8.16897	4.21637	7.08232	3.6947	3.13302	3.81785	6.22892	3.71074	6.08176	6.28704	1.26028	7.51028	4.37064	3.42287	6.75373	5.8206	7.575	6.21572	23.7514	60.5253	61.4499
MSTRG.386	PGSC0003DMT400025418	3.63911	3.45428	3.15736	8.08718	8.28856	0.999598	1.56335	0.607125	0.416312	2.35705	1.71186	2.82234	7.23024	9.23813	3.51614	5.96949	4.06095	5.5818	3.23585	1.48351	2.00298	5.03533	1.80258	4.73123	4.99349	0.873225	5.70101	1.9687	4.51676	6.46889	3.89002	7.92852	0.427907	0.592476	0.584142	0.58397
MSTRG.386	PGSC0003DMT400025414	3.17809	4.89661	5.48323	15.6905	19.6328	26.8731	56.6207	28.8862	51.6182	3.51005	2.42907	5.13516	9.38264	8.83753	5.75169	13.007	8.66602	7.26678	4.81447	1.71554	2.9928	6.87935	5.3954	9.61751	8.88731	2.23492	10.6048	8.67421	5.98764	3.74811	9.97723	11.838	6.13694	15.454	58.0145	33.9785
MSTRG.386	PGSC0003DMT400025412	2.44278	1.63694	7.0237	20.166	21.7758	6.62197	8.2268	6.31907	11.3648	6.37332	7.17973	8.59843	1.42288	1.90457	8.69756	16.6782	9.27858	12.0817	0.754396	5.42109	4.18661	4.94741	8.69792	9.92967	15.0976	5.08971	16.3937	7.75679	1.37292	0.79055	12.1882	16.4381	0.46649	4.4823	0.289193	12.8058
MSTRG.388	PGSC0003DMT400011322	5.38635	3.69227	8.69373	4.50388	4.27372	5.4318	7.28318	8.3796	4.82868	10.8551	9.88006	3.52771	1.52351	3.07239	5.54607	3.00128	2.10312	5.14954	4.06648	10.7928	8.47245	3.74589	3.34223	7.42401	2.57553	4.68733	3.09424	3.56293	2.97505	3.82792	3.53791	5.67934	5.70342	3.67028	6.39519	7.246
MSTRG.389	PGSC0003DMT400011328	2.02829	3.55084	4.85062	2.90767	5.81203	5.11619	4.89607	3.35584	2.99257	4.78156	4.09169	2.2713	2.83408	4.13934	4.17898	1.19684	1.88986	2.70856	3.02418	5.2428	3.69283	4.09003	3.98381	3.8352	3.53954	3.76056	2.27543	2.40148	2.41646	4.62619	4.66091	4.36506	3.87753	3.87626	2.38987	4.98928
MSTRG.352	PGSC0003DMT400080854	0	0	0	0	0	0	0	14.3269	19.4368	0	0	0	0	0	0	0	0	0	0	0	0	0	0	0	0	0	0	0	0	0	0	0	0	0	0	11.1713
MSTRG.349	PGSC0003DMT400027799	4.43549	5.69403	4.23606	4.63729	4.38422	4.31716	8.25043	7.92553	12.0967	4.48719	6.76795	5.00404	2.79733	3.18595	2.80533	4.28348	2.80889	3.3805	2.83256	5.49618	4.16597	2.94598	2.53234	2.22389	3.14461	4.0451	3.17223	3.51387	2.0953	3.72973	2.92752	3.81738	3.22071	6.76964	4.22202	6.94731
MSTRG.350	PGSC0003DMT400080844	6.8774	4.72746	1.01932	0	0.858283	2.74336	1.09245	0	3.78363	0	3.61504	4.37293	0	2.88611	2.73223	4.0601	2.80228	2.97608	4.92815	0	0	1.72748	3.00559	0	5.2552	2.19511	1.91483	6.67886	1.81489	0	2.18062	1.80581	2.17299	2.31619	1.75949	1.15111
MSTRG.351	PGSC0003DMT400080852	2.69583	4.978	0.854805	2.742	1.15902	3.80585	3.28205	3.61501	3.17705	3.09716	3.9291	3.09715	2.57288	2.45521	1.63661	3.31504	2.10254	2.25228	2.52449	1.06256	1.32952	1.49581	0.263877	2.43489	1.50648	1.16043	4.16211	2.02287	1.38307	3.43816	1.60127	0.983532	1.70254	2.49953	1.19668	2.73314
MSTRG.349	PGSC0003DMT400077870	0.091944	0	0	0.17322	0	0	0.013172	0	0.007846	0.027761	0	0.112648	0	0	0.029814	0.29878	0	0.029861	0	0	3.79018	2.08427	0	0.097193	0	0	0.317676	0.270342	0.068427	0	0	0	2.78398	5.68166	0.005203	0
MSTRG.353	PGSC0003DMT400077864	0.015333	0.004511	0	0	0.003652	0.015195	0	0	1.16714	0	0.008402	0	0	0	0	0	0	0	0	0	0.986452	0	0	0	0	1.4208	0.007795	0	0.807331	0	0	0	0	0.003566	0.004544	0
MSTRG.356	PGSC0003DMT400027241	7.12981	9.71913	6.94391	2.82132	1.63165	2.67798	3.25533	2.29744	3.3594	13.0333	20.3368	6.20476	5.10278	3.14698	2.38661	4.48894	4.7794	5.23728	7.18785	15.3559	8.82341	3.64629	3.96675	3.10673	4.60919	4.09935	7.07778	5.50558	6.78589	7.56105	2.66721	3.05345	2.38185	4.0624	1.68564	3.68148
MSTRG.359	PGSC0003DMT400027197	13.4128	22.6755	9.43108	4.17547	5.95998	8.18245	10.3967	14.2267	18.165	7.19036	13.6179	24.5225	1.1816	2.74182	4.55155	4.50838	2.91454	0	0	12.5126	9.72051	0	3.88675	1.95036	2.89715	7.48602	0	10.1362	8.71872	26.106	5.24161	0	4.67797	15.0125	9.76197	11.7694
MSTRG.361	PGSC0003DMT400027195	12.2244	15.7881	3.69796	3.4497	3.91994	3.7243	9.83929	10.2087	14.9355	5.08676	10.9988	13.1893	1.01958	0.506999	3.07685	3.55866	1.31963	3.27948	3.46587	7.44196	6.06176	1.40536	2.29058	1.43891	2.24668	4.16504	0.904549	6.96707	6.52022	12.535	2.98346	2.02048	4.10023	6.89156	6.37329	7.12739
MSTRG.363	PGSC0003DMT400027239	2.62357	8.37637	6.68078	4.16759	4.46375	5.12537	7.95262	6.12354	9.92223	2.76022	11.4163	18.6812	1.71751	2.48944	4.60504	4.4271	3.31057	1.67978	4.96453	0.603297	7.3253	2.5477	3.58939	1.78225	2.11161	9.29535	2.4605	9.25232	6.66871	12.7819	4.3747	3.32575	1.578	9.20861	9.10624	10.293
MSTRG.363	PGSC0003DMT400027238	0.868526	2.72897	4.69673	3.55878	0.908473	1.45904	0.218979	0.950558	2.97664	1.01602	0.784856	1.41733	1.06619	2.19975	0.622899	3.95756	0.816005	1.4716	1.31398	0.497426	0.626063	0.693952	2.25135	0.8447	0.120064	1.02068	2.29249	1.8562	1.01482	0.386757	2.57106	2.66755	0.316875	1.12078	2.46664	2.77063
MSTRG.351	PGSC0003DMT400027217	1.65902	2.85632	0.892905	2.93862	2.37366	2.84008	0.713395	1.68159	1.59283	1.14354	2.81276	6.28893	2.2279	1.58775	1.52758	2.85934	1.86054	2.1988	1.44616	0.925564	0.330286	1.66568	0.954576	1.52615	1.69648	1.31039	2.22537	5.19644	3.24002	0.545811	2.0953	1.80866	0.939009	1.428	1.32449	1.25506
MSTRG.351	PGSC0003DMT400027236	19.1191	5.57243	10.4438	9.15347	2.78634	6.56508	8.46764	6.08902	4.70026	5.03165	6.89035	10.5803	8.62327	2.34711	1.30202	11.0123	2.28561	11.7482	5.25987	4.80569	5.40904	1.80755	8.43919	5.16061	7.19165	5.43396	0.59212	6.43928	5.35417	3.60752	5.79564	1.77358	6.08004	3.7427	1.30203	2.87868
MSTRG.358	PGSC0003DMT400027228	3.98708	2.55452	1.41409	2.03084	0.369876	1.2279	0.732308	1.73395	1.4934	0.76912	2.28909	3.81476	1.65627	0.928582	0.702572	1.8676	0.977437	1.19299	3.49747	1.70796	0.463304	0.894211	1.19808	0.719631	0.984467	1.26804	0.924169	1.59124	1.65465	0.482553	0.950058	0.575898	1.18267	1.78038	0.442255	1.25179
MSTRG.365	PGSC0003DMT400027237	3.26535	3.51462	3.85352	1.07942	1.97149	2.90833	6.19904	7.71496	6.97835	4.39527	6.47863	7.96919	1.96719	2.57879	3.35999	2.21183	2.66662	3.32211	4.49556	6.60694	3.95832	1.33347	1.48606	2.01077	2.49793	2.70682	2.60471	2.42866	1.55735	8.76055	2.05111	2.39543	2.35593	3.61645	5.72268	4.99461
MSTRG.364	PGSC0003DMT400027234	3.04776	2.49095	2.48395	3.2741	1.57804	1.3562	2.95874	4.01696	5.89249	3.81244	5.15133	2.1192	0.935462	1.75372	1.62993	2.63656	1.3509	1.98201	1.45184	1.87415	2.34479	1.68975	1.85466	1.76569	2.08341	2.28157	1.97948	2.76215	1.56354	0.272011	2.06378	2.31811	1.60874	3.05543	2.81221	4.47745
MSTRG.369	PGSC0003DMT400027233	26.1673	20.4278	35.914	1.96159	0.375288	3.4963	0	0.180673	0.764699	3.46298	5.58393	30.7379	1.8487	3.16035	1.35486	2.4111	0.335669	0.640361	46.5239	7.22814	5.17049	1.143	0.647287	1.02504	0.242063	0.169908	0.85462	36.0468	48.7794	78.9485	0.338581	0.426149	1.3514	0.189144	0	0.516491
MSTRG.370	PGSC0003DMT400027230	1.25148	1.37691	0	0	0	1.05518	1.7002	1.77245	2.7813	0.771801	0	1.20362	0	0.833304	1.37936	0	1.09006	0.926428	1.11167	0	1.22084	0.636334	0.466798	0	0.893738	0.131568	0	1.26666	0	1.31381	0	0	0	0	0	0.518058
MSTRG.393	PGSC0003DMT400058494	4.89715	5.41951	3.80241	7.32934	5.95718	8.08497	7.73802	5.43403	7.27985	2.51238	1.76341	6.26293	4.26832	5.85298	1.72605	6.06389	7.62826	4.10906	6.32437	1.9584	1.34667	5.11266	5.5484	4.43043	3.35451	4.02316	6.4448	5.36503	7.95849	8.407	7.2334	8.22069	6.03365	5.18885	7.24672	4.91934
MSTRG.396	PGSC0003DMT400058449	4.99833	5.39826	6.7808	5.79162	5.92592	6.30856	10.2075	7.75425	9.63147	10.9242	10.1428	5.58641	6.94393	6.99639	7.60034	6.32495	4.08416	7.19659	4.28264	9.51664	9.65682	6.4366	7.06215	5.12443	5.45638	10.484	6.52711	3.14592	3.97637	4.69613	6.14553	7.72267	8.33427	6.4107	12.1474	10.1519
MSTRG.395	PGSC0003DMT400058450	5.5894	4.91745	5.04239	7.43942	5.83633	5.87879	5.53176	7.26913	6.51964	8.09943	9.38153	5.11363	4.7038	5.35529	4.41268	7.45838	4.37315	5.75675	4.72091	8.16307	6.78395	4.46874	5.62021	3.52796	7.11201	7.1024	5.74153	4.6893	3.63471	1.70857	6.38633	4.69209	4.44303	6.47045	6.14323	6.72806
MSTRG.397	PGSC0003DMT400058489	17.1655	27.5341	61.4693	51.1337	46.4824	55.5102	85.1938	56.0238	76.5501	71.341	62.9394	25.3233	42.1242	54.0287	49.8688	31.8125	32.4874	30.3911	23.2129	60.6542	67.8748	51.5578	56.9073	50.2438	34.037	33.7862	37.3759	19.3538	31.004	23.3498	59.5655	46.0927	46.0817	52.7422	49.8808	68.4911
MSTRG.399	PGSC0003DMT400058480	52.6431	0.968967	10.1515	3.8951	7.84957	0.984914	38.1719	6.77947	4.40126	4.53069	3.59651	68.0242	11.6202	2.83271	0.729834	7.39161	4.28869	35.5051	1.68091	1.81146	53.7578	32.7475	8.4097	4.24409	32.1263	59.9392	8.90776	1.24162	58.7915	2.56666	4.9858	20.2916	44.0409	23.9035	53.9533	7.4597
MSTRG.403	PGSC0003DMT400058479	2.89302	3.56689	1.68515	2.15874	1.8348	1.76607	2.31378	2.11458	4.0019	0.506774	0.495484	2.3373	1.54759	1.19392	3.29141	1.54032	1.42138	2.64232	3.4157	0.907983	1.09404	3.14536	3.46236	2.81878	2.57361	3.41243	2.64111	2.34099	3.19982	2.31651	3.75171	2.54362	3.14077	2.94049	2.97555	3.12194
MSTRG.402	PGSC0003DMT400058442	1.84075	1.08529	20.4752	17.1194	16.2745	17.917	14.9094	15.4687	0.100512	14.8679	0.171881	30.0984	16.0951	0.808079	17.8001	14.6884	6.88576	16.614	1.42121	15.5817	15.2934	0.742064	19.9705	10.3845	0.687659	20.3266	17.1805	0.869784	19.722	16.172	0.086598	8.1045	0.526801	0.784508	0.565672	14.4533
MSTRG.405	PGSC0003DMT400058472	1.9216	3.44074	0.902902	0.827705	0.204966	0	0	0	0.345495	3.11169	5.24931	3.12826	1.00185	0.23034	0.113623	0.726939	0.441728	0.202531	3.26232	1.14046	0.170427	0.195065	0.409677	0.091109	0.448543	0.310759	2.10041	0.696345	0.214017	0.780229	1.47075	0.564269	0.28137	0.353149	0.245416	0
MSTRG.404	PGSC0003DMT400058477	13.8451	17.7831	7.97148	10.3959	7.43038	10.4317	11.1032	8.26535	7.68161	7.60481	10.5029	13.7652	5.99287	9.06067	6.7889	8.90193	8.44503	8.65372	4.74432	8.22014	6.07308	5.79242	7.71724	7.97337	8.70495	7.25461	7.31302	11.1358	11.477	9.60663	8.48623	9.27052	7.15177	5.18509	7.7108	6.4066
MSTRG.408	PGSC0003DMT400058441	3.01138	2.10654	2.36724	2.19774	1.65231	1.90842	1.48336	0.906176	1.72267	0.918113	1.31978	3.66923	1.31424	1.6833	1.25324	1.75459	1.91452	2.66847	2.71619	1.26092	0.772639	1.63428	2.50554	1.71035	1.6363	1.96032	1.51923	3.11729	3.97164	3.53974	1.91307	1.59132	2.17495	1.56127	1.41572	1.33904
MSTRG.407	PGSC0003DMT400058437	2.92297	2.92748	0	0.311521	1.63281	0.555828	0	1.62218	1.31709	0.725594	1.97952	1.79098	3.31921	0.992329	3.53768	1.92245	1.04195	2.28144	3.96681	0.793312	0.753092	4.07226	1.29193	1.21372	3.09271	2.13418	1.69884	1.79124	3.95748	2.2106	2.49798	2.63902	1.91263	0.529903	1.06256	2.38992
MSTRG.409	PGSC0003DMT400097155	104.884	113.431	13.7429	18.517	28.9803	15.6705	11.9081	43.3069	23.4332	10.1257	14.4463	104.91	15.0333	14.1358	18.196	11.0158	10.7938	13.6047	5.27935	11.3048	8.18758	10.8724	16.5349	15.2943	8.35648	28.5077	9.31119	113.7	134.098	180.8	16.2192	23.2487	26.1078	30.915	29.1099	44.2905
MSTRG.410	PGSC0003DMT400058435	779.813	653.67	623.548	447.381	388.384	467.024	532.7	456.989	548.635	536.265	560.213	751.874	504.322	402.345	505.234	510.288	483.535	630.96	814.208	549.898	532.33	592.855	537.409	391.724	485.29	494.941	553.41	585.049	652.95	925.984	396.343	359.811	462.873	545.915	452.015	433.986
MSTRG.411	PGSC0003DMT400058471	425.03	453.333	201.295	273.872	240.719	261.194	267.596	230.335	264.356	58.9389	177.846	434.307	149.773	220.924	225.057	295.946	220.377	290.289	310.688	155.839	122.749	255.324	236.787	201.38	10.646	248.487	267.371	346.014	212.569	178.547	263.692	236.012	215.651	250.122	238.077	212.194
MSTRG.413	PGSC0003DMT400058468	14.5226	9.62885	11.1533	12.5966	5.22727	7.89101	7.67553	10.8288	2.27225	11.6998	0	20.1206	1.97866	12.3938	5.13868	9.87134	7.7685	13.4407	19.4374	16.1255	9.65833	9.64265	12.3863	7.0437	4.25913	11.9753	0.875705	10.9663	9.2828	22.8465	5.41304	9.0978	6.37336	10.8577	7.03111	0
MSTRG.414	PGSC0003DMT400058466	24.4997	22.1705	19.0056	32.386	31.0796	33.2612	26.6191	0	26.6914	28.7525	30.619	0	0	21.0018	26.5149	25.2365	22.9132	7.93975	25.0329	30.928	25.4846	26.0381	28.2897	27.254	18.691	22.599	0.018529	19.5676	22.3323	21.8756	26.2222	23.6173	23.9589	23.697	26.9498	23.5854
MSTRG.415	PGSC0003DMT400058464	3.37861	5.89665	6.21007	10.4947	8.04508	8.00114	2.29626	1.8934	2.53394	3.83491	3.84237	1.90559	7.67042	3.82998	2.12519	3.94724	5.47855	2.93245	4.63961	6.18279	0.831953	8.82385	4.22917	1.09993	4.40534	2.64867	4.33202	3.23489	13.2212	5.60054	3.52343	1.96388	3.52515	2.67625	3.91421	1.11318
MSTRG.416	PGSC0003DMT400058461	10.3036	13.9168	15.3546	20.0241	19.5891	18.4356	12.3596	11.9826	16.4261	10.2576	15.0138	11.0466	16.9004	22.5574	16.1732	16.0035	15.5627	11.0927	12.1942	13.0714	13.2563	19.4568	15.9193	18.9664	14.5049	11.8297	11.6358	10.0345	12.5742	4.52152	17.3586	23.0605	14.2442	18.6314	13.5597	13.8831
MSTRG.417	PGSC0003DMT400058504	2.49851	5.23588	7.94314	3.17193	3.86654	6.95874	4.25847	2.26998	6.54555	10.5046	6.88262	3.84848	6.97063	2.33554	4.25476	4.24083	1.2741	4.61648	5.39227	15.1726	17.4226	4.42391	4.90984	5.04746	3.70994	4.52675	3.78341	5.65629	3.00533	8.2089	2.9106	4.5314	2.95521	2.88654	3.89851	3.46302
MSTRG.418	PGSC0003DMT400058429	408.061	362.558	315.201	334.928	302.106	326.418	464.522	352.295	424.735	282.125	332.966	372.446	431.269	374.203	379.418	388.502	383.908	496.023	448.712	265.162	308.707	452.425	426.446	289.369	435.507	383.186	390.633	314.87	413.022	562.126	288.776	276.202	333.168	492.117	461.973	382.497
MSTRG.420	PGSC0003DMT400058458	2.29237	1.2566	1.6512	0.96835	0.332581	1.78331	0	0.790954	0.652588	0.766372	0.665923	1.14404	0.728143	0.42857	1.04619	0.449646	1.07181	0.785062	1.95981	0.917737	1.28231	1.28676	0.771967	1.03553	1.30473	0.973448	1.31971	1.15007	1.35103	2.35868	0.542094	0.699604	0.65932	1.13059	0.910961	1.02414
MSTRG.419	PGSC0003DMT400058459	6.16687	3.83814	2.60306	4.4241	2.986	3.56454	27.5299	3.11772	1.70481	6.43001	0	5.97673	2.07364	2.38943	2.067	2.90085	3.0326	6.83503	4.7331	4.54734	1.26779	2.65838	4.56941	0.976881	2.02179	1.72652	3.03431	12.7081	6.12736	10.5822	4.44683	3.63262	4.21909	3.36862	3.61185	3.23594
MSTRG.425	PGSC0003DMT400058453	0.634385	2.60094	0	0	0	0	0	0.40707	0	0	0	0	0	0.978948	0.578085	0	0	0.574098	4.17111	0	1.32554	0	0	0	0	0	0.785074	1.18224	1.87658	1.68594	0	0	0.589325	0	0	0
MSTRG.423	PGSC0003DMT400058456	49.0572	48.217	36.3222	31.5406	29.291	30.8605	30.9773	31.9102	27.6392	42.4273	36.0686	47.5288	28.8443	28.9657	29.1191	32.8479	28.3614	36.6654	38.197	39.4847	34.7899	29.479	28.4154	31.0959	29.2127	38.0983	27.5298	36.1831	34.6117	32.9777	31.7366	27.2975	34.8787	26.6452	31.319	30.6736
MSTRG.424	PGSC0003DMT400058426	0	0	0	0	3.54262	0	0	0	0	0	0.419295	2.51425	1.97658	4.57914	0.714007	0	0	3.59835	0	0	0	1.43179	0	5.7118	4.2276	0.57047	0	0	0	0	4.06151	0	0	0	0	1.51381
MSTRG.432	PGSC0003DMT400044156	1.25326	0.275786	0.026328	0.656296	0.585546	0.833554	0	1.14257	0.696453	2.52238	1.19208	1.82328	0.980188	1.48989	0.733182	0	0	0	0.98065	1.39146	0.562512	0.80088	1.8457	0.44654	0.334386	0.361747	0	1.62184	0.705038	0.845989	0.287422	0.182092	1.14268	0.700015	0.528403	0
MSTRG.436	PGSC0003DMT400014110	2.62845	1.58181	0.845805	2.25912	1.13562	1.56791	2.70238	1.36783	1.32466	2.22409	1.3335	4.42947	1.08485	1.95146	1.5843	1.28913	1.7499	1.59682	2.87125	0.982367	1.61215	0.980565	1.41092	2.22435	1.94733	1.50609	3.32086	0.048244	1.04954	1.25488	1.13644	1.67285	0.945523	1.59347	1.44765	1.5259
MSTRG.437	PGSC0003DMT400014112	2.05079	1.66938	1.48903	1.63584	1.54412	1.55845	0.698543	2.01867	1.26699	1.28144	1.17751	0.785158	1.99185	1.46571	1.34226	3.02753	2.12951	1.83109	2.209	0.337176	0.605382	1.07165	1.92651	0.571664	2.62869	2.79293	1.51884	2.26265	1.68518	0	2.09352	1.59576	1.3802	2.66736	1.40714	1.78663
MSTRG.440	PGSC0003DMT400014120	4.7427	3.11622	3.7063	3.16039	2.55398	3.1357	3.49158	3.32225	2.64089	1.40075	3.28261	3.36077	4.35959	4.73976	2.91234	3.16643	2.05609	5.17026	5.14918	2.38261	2.15651	5.29403	3.98412	2.07032	3.33158	3.48091	1.62118	5.50385	4.73536	5.31745	2.28214	4.08589	3.60747	2.96228	2.30694	2.90777
MSTRG.442	PGSC0003DMT400022466	3.21503	3.22097	11.6747	14.5628	15.6492	13.5458	18.6513	11.5746	15.8373	14.0498	13.9385	4.71424	7.49696	12.0839	10.744	10.9267	8.58237	9.99199	4.42088	10.8496	13.4306	9.91534	8.28145	10.9592	6.5097	2.03483	7.35354	1.68502	4.21353	3.92185	9.68843	14.7443	9.13014	9.9392	11.7929	10.5172
MSTRG.443	PGSC0003DMT400022474	113.329	127.589	21.706	17.1182	15.0177	13.3901	21.1102	26.3355	22.7617	23.5676	34.1799	104.559	18.2143	13.684	19.5713	18.9362	18.6098	16.358	3.77788	40.7353	36.4408	15.0372	10.1889	12.892	13.0205	18.7005	21.4766	87.019	95.1705	146.639	10.7082	18.889	14.0732	16.7686	27.3834	18.7277
MSTRG.445	PGSC0003DMT400022467	0	0	18.5445	0	0	0	0	18.4496	0	0	0	0	0	17.5561	0	0	0	0	15.9049	0	4.5152	0	0	31.5559	0	0	0	0	0	0.365731	0	8.90464	6.4948	0	8.09758	0
MSTRG.446	PGSC0003DMT400022472	3.29435	2.77511	3.85853	12.4033	9.9314	13.221	16.0482	12.9761	14.4991	4.59435	4.78044	3.28652	6.07502	7.47119	9.04397	6.49593	3.97281	7.36147	3.46141	3.76846	3.52654	6.82525	9.85201	8.42366	7.94802	9.97833	7.89005	4.90576	2.75331	1.88834	16.2076	11.5204	8.23219	10.0435	11.7967	12.1438
MSTRG.448	PGSC0003DMT400034175	0.690935	1.00608	0	0.164102	0.140339	0.152262	0.762105	0.166205	0.122554	0	0	0.631508	0.153627	0.727893	0.275627	0.218578	0.442567	1.1055	0.170073	0	0.115668	0.262125	0.225643	0.539594	0.306278	1.76823	0.079896	0.41106	1.09018	0.04009	0.084408	0.159358	0.059384	0.21219	0.24085	0.048285
MSTRG.450	PGSC0003DMT400077846	0	8.26781	0	0	14.111	0	0	0	0	0	0	0	0	0	9.62636	0	0	0	0	0	0	0	0	8.31265	12.1541	0	0	19.954	0	0	15.8742	11.5138	8.51934	0	15.2235	15.9598
MSTRG.447	PGSC0003DMT400034167	22.4154	21.4502	11.2582	26.431	21.0469	22.2626	20.2231	21.1692	20.7903	16.6403	15.0186	22.5885	19.033	18.5368	19.2618	21.5478	12.5802	18.9624	16.8173	14.8401	14.0522	16.6974	15.7276	19.353	21.6076	20.3037	17.6311	27.641	12.5459	5.32629	22.8435	20.5876	17.6898	17.0017	25.5579	26.6742
MSTRG.444	PGSC0003DMT400022476	1.69658	8.51848	12.7104	7.6791	5.65292	2.94035	13.2814	3.73146	1.89276	6.09904	7.81845	14.3848	10.059	6.78798	1.47357	17.7315	16.8258	14.0969	12.8147	8.98644	3.83896	2.62841	6.38622	6.24428	5.92001	8.27768	16.3856	14.2024	17.0795	75.6833	4.22791	3.70208	7.93367	10.0124	12.3119	5.01279
MSTRG.453	PGSC0003DMT400077848	0	0	0	0	0.158445	0	0	10.4934	9.54606	0	0	0	0	0	8.75491	0	0.36777	0.398608	11.8203	6.32689	0	8.39326	0	7.54191	0.589607	0	0	0.699786	0	7.37345	0	11.8918	16.6302	1.3835	8.39319	0
MSTRG.454	PGSC0003DMT400038193	10.1776	10.892	9.77266	14.0192	13.9726	12.6342	10.8794	11.5871	13.2729	11.3961	9.15389	10.0853	16.5063	13.6608	13.5383	14.9727	8.17964	14.1539	8.75821	8.33182	9.74397	19.8381	16.4219	14.8257	13.3816	13.6584	10.418	11.5955	7.53913	5.44256	17.096	13.89	12.4091	17.0524	13.9368	14.2102
MSTRG.458	PGSC0003DMT400038229	1.97205	1.80191	0.74687	0.842526	0.54925	1.6532	0.829148	0.703142	0.889468	0.91536	1.19452	2.26331	1.34268	1.11945	0.799996	1.51117	0.965568	1.87473	1.49311	1.39071	0.886261	1.14692	1.0449	0.829166	1.76775	1.83122	1.43876	1.88127	1.56645	1.13803	0.659433	0.495443	1.10114	1.39949	0.809205	1.13721
MSTRG.462	PGSC0003DMT400038232	0.077792	0	0	1.28203	0.367291	0.245772	0.297694	0.307898	0.515424	0.422008	0.315413	0.079742	0.450075	0.353207	0.279216	0.074115	0	0.092431	0.332171	0.546498	0.18073	0.208963	0.075321	0.074409	0.299096	0.206823	0.156047	1.36249	0.048835	0	0.247288	0.347036	0.240471	0.48074	0.615291	0.343904
MSTRG.456	PGSC0003DMT400038174	103.691	134.525	95.3682	172.493	156.338	167.709	221.58	189.44	232.425	101.406	108.072	113.609	140.546	158.821	150.113	152.523	142.503	168.283	120.743	89.081	95.3542	179.674	158.757	140.731	151.322	137.727	159.357	109.641	114.096	104.006	166.675	175.404	146.98	181.018	193.453	178.666
MSTRG.464	PGSC0003DMT400038207	4.09322	6.6379	11.4373	5.36454	5.95692	8.07739	10.792	30.5123	39.3203	10.1223	25.3238	9.36287	2.94235	3.55789	7.90257	2.29491	1.96053	2.38191	5.7085	11.8767	6.38795	2.33216	2.61476	1.74127	1.36358	7.00644	1.25652	5.04435	3.98036	9.38546	1.45523	1.36131	4.04934	27.2756	16.3293	32.2397
MSTRG.463	PGSC0003DMT400038206	17.4315	16.0399	19.6352	21.762	17.4044	22.8943	21.7534	22.445	23.1239	14.4963	13.9795	14.037	13.2364	16.9428	16.3541	15.9783	15.8575	14.9827	12.4171	16.8498	13.2668	16.1103	18.2788	17.9171	17.5182	13.7527	13.5486	12.2921	12.0054	8.92572	21.9021	20.281	20.3447	19.5304	21.7058	19.4419
MSTRG.467	PGSC0003DMT400038213	0.81862	0.831929	1.35916	0.118046	0.269206	0.649327	1.68529	2.39374	1.9579	1.5985	3.8658	0.796405	0.442043	0.409779	0.601228	0.982701	0.930871	0.777397	0.835996	0.998345	0.914589	0.160339	0.177071	0.16779	0.438973	0.09141	0.114946	0.100536	0.035973	0.286074	0.177298	0.214364	0.283642	2.19609	1.03814	2.04559
MSTRG.465	PGSC0003DMT400038212	0	0	0	0	0	0	0	4.93847	2.09929	0	3.82362	0	0	0	0	0	2.15549	0	0	0	0	1.70567	0	0	0	3.79422	0	0	0	0	0	0	0	0	0	0
MSTRG.470	PGSC0003DMT400038216	0.73801	1.0869	1.01078	0.383829	0.556247	0.544384	0.43398	2.44124	1.7017	1.43863	2.50365	1.1261	0.493482	0.555664	0.440248	0.540752	0.416851	0.747653	0.486276	0.918919	0.732295	0.464917	0.490992	0.097817	0.333479	0.337317	0.10812	0.343887	0.210362	0.237565	0.398463	0.149685	0.118568	1.9236	0.370244	1.34488
MSTRG.468	PGSC0003DMT400038215	1.4776	2.62192	6.59586	3.11364	3.49971	2.79508	2.87045	8.33118	5.67292	8.98661	13.5282	2.07574	2.86316	3.64118	2.90603	3.70479	2.71862	2.75085	0.86852	6.93716	6.32617	2.77745	3.89236	1.87545	4.00857	4.41198	2.07675	1.93333	0.614584	1.31728	3.45163	3.45649	1.92272	7.41744	3.00645	5.10722
MSTRG.472	PGSC0003DMT400038218	2.16677	1.41447	0.274221	0.454698	0.328147	1.37261	1.06919	1.05213	2.08616	0.742681	0.849623	2.15356	0.269413	0.586713	0.69195	0.266191	1.80188	1.48058	0.957395	0.329749	0.441391	0.65294	1.16841	0.417234	1.67223	0.913671	0.840676	1.55347	0.655986	0.615867	0.538813	1.4085	0.356159	1.55048	1.45973	0.829838
MSTRG.473	PGSC0003DMT400038220	1.58736	1.33367	2.76986	1.03527	1.05345	2.28867	1.90882	3.05446	4.9181	5.61115	5.22696	1.9716	1.23804	0.994372	1.56394	3.13607	1.45322	2.52081	1.08482	0.939482	1.5767	0.148049	0.170124	0.139901	0.299001	0.423932	0.236441	0.698812	0.381399	0.649584	0.285643	0.058222	0.264148	2.37395	0.846158	3.32901
MSTRG.474	PGSC0003DMT400038236	0.295363	0.324097	0.752546	0.353662	0.521909	0.53639	0.50224	2.77965	3.38959	1.43164	2.81168	0.424844	0.397716	0.447906	0.494299	0.38388	0.238869	0.528146	0.612764	1.14613	0.566215	0.201206	0.245733	0.130135	0.303549	0.368611	0.248032	0.223517	0.119059	0.156313	0.172345	0.24578	0.197593	1.79099	0.966971	2.04518
MSTRG.475	PGSC0003DMT400049067	0.615363	0.694298	0.715723	0.400615	0.234148	0.514197	0.996023	2.40883	2.34342	1.57916	3.2267	0.737562	0.331351	0.478101	0.67151	0.858961	0.150581	0.676319	0.229825	0.75984	0.591028	0.20748	0.097514	0.027675	0.141461	0.372947	0.105413	0.096725	0.193476	0.273186	0.076199	0.064508	0.14243	1.6526	0.589694	1.7417
PGSC0003DMG400019071	PGSC0003DMT400049066	0.25023	0.166625	0.455733	0.20232	0.123332	0.188677	0.246468	0.777803	0.572368	0.878871	1.16519	0.097837	0.080745	0.080791	0.372377	0.314737	0.013893	0.146911	0.022442	0.602575	0.26924	0.068795	0.089737	0.072409	0.165427	0.06396	0.142238	0.1596	0.033554	0.065453	0.061733	0.046868	0.137064	0.456033	0.187672	0.372249
MSTRG.477	PGSC0003DMT400072136	57.4492	70.9808	48.3109	82.1895	68.1886	64.7911	67.4629	52.9311	39.5959	24.2113	29.1913	56.6177	74.4472	92.0589	54.413	130.194	120.419	123.69	58.2593	26.6062	27.7228	42.6362	33.7148	38.6551	106.377	148.099	72.2488	81.8333	59.9018	69.153	82.8225	69.6417	90.0354	41.077	77.1034	75.7272
MSTRG.479	PGSC0003DMT400030571	29.7626	26.741	21.6035	1.08159	28.3334	14.9737	21.8212	13.9824	11.1786	27.6132	18.711	27.642	23.1905	23.8994	18.5242	21.5812	23.7528	23.0036	29.3187	20.9349	13.6904	23.6717	12.1197	32.8685	21.4903	22.8264	7.27759	17.126	12.2648	27.4332	23.733	29.262	18.5962	21.2546	23.419	23.0256
MSTRG.481	PGSC0003DMT400030553	1.27555	1.7411	19.1829	7.0261	6.98349	8.58814	8.08278	15.5755	12.6916	22.4925	15.9754	1.89874	4.6414	4.25611	7.3573	5.01462	3.26425	4.70695	0.300576	15.1464	20.1445	4.37375	7.86736	4.48884	4.19343	7.80153	3.05948	1.05692	1.1282	2.04378	7.22638	6.53587	7.57057	7.73384	9.16793	14.815
MSTRG.480	PGSC0003DMT400030565	15.6635	18.9498	22.2969	12.5354	20.7184	18.7054	24.9393	22.5844	23.2799	16.7012	18.6872	25.2446	8.18107	20.1585	15.3426	10.0953	8.39611	11.3854	9.64862	23.7213	13.6386	14.3333	18.389	24.6405	12.912	11.8792	15.0454	11.8735	13.3331	30.0646	19.2739	17.0293	18.2468	14.1425	21.8891	15.2207
MSTRG.484	PGSC0003DMT400030589	0	0.377638	0	0	0.957893	0	0	0	0	0.177896	0	0	0	4.84845	2.65571	0	1.68262	1.63029	0	0	0	0.605594	0	0	0	0.480652	2.91333	0	0	0	0	0	0.742883	0	0	0.809389
MSTRG.476	PGSC0003DMT400072137	640.254	492.122	418.943	345.697	305.494	316.007	290.538	365.731	366.215	394.772	396.781	543.863	429.157	290.123	345.81	612.144	441.71	696.995	613.825	436.318	445.82	448.234	394.645	243.443	615.507	694.509	618.322	556.224	476.796	412.826	292.247	239.006	348.128	536.595	339.311	378.418
MSTRG.486	PGSC0003DMT400030584	0.061333	0.0805	0.68836	0.78873	1.37198	2.34662	1.22328	6.31064	2.56759	1.3552	1.11896	0.291655	0.825322	0.868649	1.91788	2.2402	0.730839	1.42831	0.1418	0.968358	1.35206	0.658731	1.21045	3.25863	1.04621	0.865861	1.02423	0	0	0.030249	1.37881	4.56413	1.9054	5.83135	5.14081	7.48256
MSTRG.486	PGSC0003DMT400030583	0.254078	0.25011	0.145865	0.044454	0.514692	0.585076	0.297765	2.23428	0.73661	0.778364	0.847611	0.372905	0.417767	0.353006	0.513878	0.986856	0.907055	0.690798	0.033225	0.946901	0.266819	0.265026	1.11703	0.847963	0.361035	0.492322	0.248485	0.155788	0	0.250616	0.36761	0.968788	0.919261	1.12837	1.73213	1.76566
MSTRG.491	PGSC0003DMT400030581	0	0	0	0	0	0	0	0	0	0	10.7389	4.20716	0	0	0	0	0	0	1.51744	0	3.05577	0	0	0	0	0	0	3.92738	0	0	2.69821	0	0	5.81842	0	0
MSTRG.485	PGSC0003DMT400030585	0	0	0.628938	0	0.367421	0	0.293699	0.753706	0.313218	0	0.832404	0	0	1.20947	0	0	0	0	0.139805	0.173959	0	0	0.154501	0	0	0	0	0	0	0.291919	0	0	0	0.124094	0	0.15607
MSTRG.492	PGSC0003DMT400030574	3.762	3.57894	1.96833	2.06226	1.2049	1.48225	1.20803	0.687404	1.45825	3.19144	2.39689	5.83885	1.52147	0.522093	1.27506	0	1.50862	1.96657	1.7587	2.12468	1.41387	0.209948	1.00618	0.906161	1.19423	1.99629	1.46891	2.46967	0.990651	0.77614	0	0.695542	1.37107	0.90189	0.693878	0.412442
MSTRG.494	PGSC0003DMT400028137	0.855162	0	0	0	7.79217	0	0	0	8.45965	0	0	0	19.6802	6.57477	1.20765	1.99988	5.0184	0	0	0	12.8129	16.3891	0.135546	0.511073	8.97089	4.90527	0	0	0	0	8.30348	0	12.3778	16.9442	5.83064	0
MSTRG.493	PGSC0003DMT400030572	5.19267	5.91239	3.37624	1.85443	0.990175	1.31114	0.853533	2.75348	2.04598	3.09692	4.27637	7.99245	1.25907	0.912576	1.33428	1.84415	2.03535	2.97577	2.23731	2.83123	2.46096	1.22473	1.74316	0.637621	1.19134	2.16984	2.06491	3.15909	1.74827	2.18876	0.922445	0.546569	1.1003	1.46183	1.17333	2.05099
MSTRG.500	PGSC0003DMT400077162	5.20488	3.93819	45.9091	192.656	220.126	224.531	741.225	486.557	851.354	72.2026	105.529	9.91456	48.3693	80.0379	218.97	89.0299	155.917	125.712	19.169	70.9592	57.7562	58.3804	138.995	106.938	63.4804	93.3065	156.056	4.98789	2.6766	16.6267	132.089	227.633	169.351	423.673	508.929	709.172
MSTRG.501	PGSC0003DMT400077160	10.898	0	0	0.36407	9.25907	0.883109	7.57241	0	12.9663	0	0.562474	0	0.356305	0	0.472612	0.194266	0	5.5329	0	0	0.340908	0.527649	0	0.499735	0	0.125096	0	0	0	0.059573	0.354223	0.244954	0.169824	7.9175	0.372788	0
MSTRG.507	PGSC0003DMT400077173	3.0689	4.79871	3.35589	2.38175	1.07518	3.52537	3.31278	2.54609	5.31378	8.4963	9.79158	4.47674	2.50075	2.952	4.79774	2.42386	2.45245	4.10051	2.08794	6.24332	4.35054	6.36506	6.12158	2.16789	3.61632	8.31448	3.73944	3.97924	3.49081	2.87135	0.976387	1.72888	2.65491	2.03975	4.08265	4.63165
MSTRG.508	PGSC0003DMT400077142	5.57579	5.68098	6.16002	13.0779	9.34619	13.3083	12.7723	9.82722	9.7755	5.76879	10.4929	0	10.7311	0.345293	10.8288	15.5814	9.41754	13.094	3.77879	7.00913	10.5018	10.6158	11.4029	9.63531	13.4527	8.94851	10.9415	5.48355	0	8.18039	11.6535	12.4028	10.9357	11.9556	10.9744	10.1028
MSTRG.506	PGSC0003DMT400077144	64.3645	75.7015	102.278	120.908	122.668	125.954	121.12	102.912	96.4945	96.9706	89.7357	69.7039	101.978	139.811	124.968	112.58	143.163	107.232	102.393	108.375	105.603	116.026	111.668	155.244	115.224	95.5076	117.649	85.2699	109.515	129.298	142.383	161.707	151.229	96.321	117.966	90.8885
MSTRG.513	PGSC0003DMT400077141	7.60868	7.89739	11.2134	11.4736	15.7984	17.4897	14.2422	26.7005	2.6258	6.14872	27.1856	8.12253	7.00161	5.38732	18.3732	11.4517	7.75855	10.1994	7.62385	6.94974	14.8788	9.34359	17.3061	3.54888	11.3393	15.6422	10.5959	3.59648	5.53369	4.35553	1.69328	9.08488	1.3551	16.3682	24.8642	23.6555
MSTRG.509	PGSC0003DMT400077171	112.984	110.313	121.494	50.4053	26.9549	52.8191	91.4183	95.6876	90.4588	85.4526	114.041	113.776	47.3157	42.2778	52.1649	48.4648	76.6794	92.0143	78.4648	137.621	94.5817	48.837	52.32	43.672	55.3671	88.5965	55.0947	59.578	73.0898	102.269	37.7859	43.6982	52.8751	39.4796	45.1349	82.206
PGSC0003DMG400011885	PGSC0003DMT400031020	0.376176	0.3703	0.904543	1.13914	0.432973	0.727929	0.529027	0.312664	0.614415	1.32657	0.373678	0.368071	0.511885	0.479825	1.18556	0.351225	0	0.86289	0.196765	0.126901	0.157374	0.309453	0	0.089953	0.14346	0.073508	0.18487	0.175963	0.231427	0	0.195312	0.147495	0.20611	0.157115	0.33438	0.223454
PGSC0003DMG400011894	PGSC0003DMT400031054	1.06289	1.14387	1.24708	0.295079	0.253318	0.37413	0.569672	0.235446	0.423027	0.329368	0.845219	1.08491	0.474468	0.995302	0.570549	1.33893	0.908741	1.04727	0.799789	0.185594	0.309593	0.411054	0.434402	0.800066	0.735407	0.798418	1.17437	1.23612	0.969058	0.46337	0.503193	0.549733	0.536901	0.863706	0.564754	0.435579
MSTRG.520	PGSC0003DMT400031033	30.1342	36.4071	42.4165	35.0064	37.1099	34.0491	40.4088	34.9319	33.7525	41.8915	35.9928	34.5146	30.7668	38.8695	30.9559	27.6167	29.3289	26.3642	28.8019	30.8237	38.0507	38.1075	32.9263	36.1606	26.8222	25.9388	33.5461	26.6399	34.6929	37.8098	28.8723	39.2283	36.5722	32.7817	34.0976	29.6014
MSTRG.517	PGSC0003DMT400031035	0	0	0	1.72701	0	0	0	0	0	0	0	0	0	3.28347	0	0	0	0	0	0	0	0	0	0	0	0	0	0	0	0	0	0	0	0	0	0
MSTRG.521	PGSC0003DMT400031045	65.154	53.2938	170.82	90.7545	63.6919	130.756	122.603	150.182	167.555	218.064	239.176	81.0052	41.9338	59.8794	52.116	75.7152	74.6097	87.4114	50.8256	210.531	119.987	73.9586	122.86	56.1423	57.0807	176.952	56.0666	48.0505	64.3354	73.8447	117.77	99.3774	153.616	93.4614	142.919	126.27
MSTRG.523	PGSC0003DMT400013404	2.28097	1.82154	1.53982	0.634386	0.573605	0.947369	0.871598	0.495318	0.703561	2.0414	1.9028	1.2398	0.213617	0.985338	0.739623	0.799486	0.562929	1.0327	0.371198	1.26543	1.15973	0.491556	0.474501	0.600473	0.432737	1.28285	0.582988	2.12452	0.90174	0.111489	0.391168	0.473356	0.058712	0.746754	0.787997	0.329257
MSTRG.522	PGSC0003DMT400031047	2.9023	3.34115	6.40249	3.82578	2.3815	3.53614	1.2865	2.31037	2.55439	6.15746	4.63887	2.71557	3.71397	3.1642	3.41366	3.41504	5.38877	2.88105	2.83907	0.704786	0.305581	1.52463	0.696612	0.428247	0.929784	0.123121	2.82166	1.37467	0.743912	1.30845	0.515281	0.720525	0.773871	2.08862	0.532586	0.947969
MSTRG.525	PGSC0003DMT400013426	0.304664	0	0	1.35621	0	0.933845	0.417032	0.493792	0.153112	0	0	0	2.82141	2.10289	0.677274	8.75272	6.47012	3.30803	0	0	0	1.56391	2.3557	2.06175	7.15137	0.176222	4.41994	0	0.093716	0	0.767186	0.44348	1.44227	1.16909	0.361086	1.06594
MSTRG.524	PGSC0003DMT400013401	0.779607	0.455971	0	0	0	0	0	0.713946	0	0.593101	1.66165	4.56165	0	0	0	0	0	0	0	1.09012	0.731365	0.182078	0	0	0	0.386986	0	1.45927	0	0.43343	0	0	0	0	0	0
MSTRG.529	PGSC0003DMT400013416	18.1612	16.9065	16.6711	4.56103	5.65128	10.1636	6.37185	3.45769	7.27808	8.60327	9.14851	16.8403	4.66719	4.34451	8.46987	15.1047	12.6589	14.4966	9.54425	4.41687	3.76589	5.14833	4.27815	5.8403	5.91786	5.61374	3.82502	6.98907	9.08284	9.8525	3.29349	5.42044	3.51439	5.65712	4.12271	6.22517
MSTRG.531	PGSC0003DMT400013386	5.83669	7.27013	5.16759	12.0734	9.99735	9.42937	13.6237	9.97639	11.8328	3.87998	5.99588	7.30481	9.34823	12.7607	11.4966	9.3267	5.52812	9.60035	8.55999	3.8484	7.70117	12.527	12.9166	11.25	8.46638	7.50171	6.64786	6.53012	8.04147	6.56815	11.2411	11.7659	10.0302	7.39623	8.1005	8.56721
MSTRG.533	PGSC0003DMT400013412	42.4515	42.2473	86.3489	123.127	118.455	119.234	86.1484	72.0238	80.1633	70.3407	56.3123	36.9588	102.691	140.111	124.478	70.6324	66.4802	59.1956	77.6169	60.996	96.2647	129.094	125.809	182.491	62.0836	52.1216	78.3496	54.6115	85.2617	69.5022	120.028	137.115	105.068	65.4751	76.1379	69.0677
MSTRG.536	PGSC0003DMT400084312	2.01486	6.84199	0	0.998828	1.46216	0	2.76906	9.14649	9.89331	0.235473	0.140421	0.687886	2.92455	3.90811	4.50851	0.918611	1.91135	3.02478	0	0.778561	0.321842	1.65562	1.20907	2.69659	2.5316	5.06941	1.20602	2.12787	0.947355	0.418303	2.84967	2.14314	1.90913	11.3962	3.66073	9.52167
MSTRG.541	PGSC0003DMT400036553	1.77628	5.83871	0	0.972437	1.42142	0	2.96083	10.276	11.1425	0.214618	0.136711	0.666118	3.5929	4.84485	4.67661	0.889198	1.85939	3.42987	0	0.378994	0.156669	1.71935	1.31512	3.4143	2.5004	6.09941	0.925258	2.08324	0.588164	0.407251	2.91634	2.56767	2.66168	12.5105	4.38283	11.4915
MSTRG.535	PGSC0003DMT400083292	42.4871	39.7373	30.3637	16.4435	11.2962	12.3679	11.6805	15.9227	13.9021	23.7969	24.8086	33.2382	12.535	14.148	12.8019	19.7192	16.5588	22.018	32.867	23.2126	17.6795	20.3308	18.326	13.2879	21.1298	27.0248	20.8707	39.542	21.7339	27.1251	12.6278	11.1867	14.0309	21.1133	12.9409	16.7233
MSTRG.545	PGSC0003DMT400043314	8.33976	7.01183	17.1738	22.5909	21.0499	25.6994	19.24	17.5843	16.259	16.7846	16.0796	8.0213	15.633	19.4131	19.809	12.2816	8.85169	10.6209	10.7445	15.4104	17.9031	13.2512	14.2022	31.7295	10.5462	10.985	12.1391	7.33076	10.0194	9.55365	24.9125	26.1375	21.6613	13.3456	16.9442	24.5574
MSTRG.546	PGSC0003DMT400043313	336.488	210.546	306.237	339.977	322.756	387.233	343.477	420.197	441.465	345.182	296.235	307.527	359.899	312.919	353.309	308.61	285.102	404.274	407.124	278.328	362.531	421.373	405.618	360.67	327.252	362.549	397.252	281.418	300.516	455.58	335.323	325.904	340.402	467.104	415.163	374.827
MSTRG.548	PGSC0003DMT400043301	0.274229	0.690969	0.643442	0.316746	0.695464	0.298434	0.600339	1.15481	0.767797	1.08563	1.1678	0.620655	0.545354	0.482887	0.529363	0.480235	0.406158	0.616503	0.26119	0.508149	0.540872	0.349241	0.398738	0.189137	0.573044	0.745707	0	0.520207	0.34279	0.190377	0.279662	0.523885	0.274214	0.732946	0.343018	0.864893
MSTRG.547	PGSC0003DMT400043312	18.5275	18.0161	71.6901	37.5304	40.0351	37.6464	40.4079	51.6948	46.6312	93.3307	95.9554	17.9034	30.3003	32.4958	32.4359	30.9421	27.4718	33.8281	15.4709	90.8722	93.0021	33.048	37.7218	35.7805	30.6774	35.7495	25.437	18.5967	12.5771	13.081	34.5581	35.9757	37.7245	44.3033	45.3689	52.5293
PGSC0003DMG400016811	PGSC0003DMT400043310	0.181472	0.476368	0.428725	0.366356	0.313307	0.476879	0.255211	0.750392	0.888746	0.160793	0.270401	0.438577	0.598485	0.328031	1.08162	0.762459	0.361122	0.132065	0.331277	0.124935	0.128597	0.685213	1.07206	0.411817	0.380291	1.20427	0.178369	0.344134	0.279108	0.178999	0.375941	0.221465	0.612159	0.787945	0.644698	0.967478
MSTRG.549	PGSC0003DMT400043311	60.8667	54.3207	52.8482	119.113	113.406	199.083	321.447	497.099	417.618	36.4297	41.4132	49.2173	654.674	409.317	612.049	393.316	295.945	696.018	73.3629	49.7384	35.7076	477.545	446.451	560.177	145.551	847.212	276.884	48.2921	45.5632	75.2412	440.753	200.931	531.479	510.661	584.473	560.863
MSTRG.565	PGSC0003DMT400015940	0.099723	0.032721	2.73361	7.78944	7.94941	7.9414	0	2.24731	2.7392	2.69081	3.26173	0.38249	5.63494	1.27125	1.96933	5.11474	3.53336	2.66409	1.36098	1.28796	1.03172	0.956306	3.12974	0.939229	2.85015	0.168365	3.29011	0.461845	0.181597	0.661006	2.60124	1.46414	4.18025	3.07723	1.87233	3.61178
MSTRG.566	PGSC0003DMT400015941	0.103853	0.136307	1.44671	3.87588	4.00513	4.46886	0	2.34498	3.52678	1.88697	1.23589	0.203229	4.49993	1.08669	1.33478	4.28839	5.64215	4.23276	0.798527	0.681131	1.32764	0.546764	1.8478	0.612569	2.85793	0.16235	3.55225	0	0.692578	0.561356	0.682991	1.40584	3.18372	3.85378	2.5298	4.46346
MSTRG.563	PGSC0003DMT400015957	4.34123	7.4616	10.5671	9.26223	8.63888	13.0104	14.7274	12.6162	12.6275	11.4855	9.48352	6.6305	10.0425	8.17726	10.5538	12.9853	10.3344	13.9731	6.08868	7.23242	11.6921	8.00926	10.5482	10.4088	9.79063	15.3896	8.0326	4.87247	7.54684	8.4111	10.1937	9.74282	12.1431	9.65598	13.8108	10.375
MSTRG.553	PGSC0003DMT400015936	0	0.143035	0.354053	2.14286	1.57106	2.02171	0	0.46497	0.74215	1.29346	1.5733	0	3.05877	0.26858	0.175025	1.35632	1.16315	0.366933	0.21699	0.750263	0.803617	0.308664	1.50754	0.461196	0.889443	0.044673	0.411182	0.135323	0.175209	0.276617	0.822321	0.134597	0.998771	0.386508	0.873264	0.706666
MSTRG.553	PGSC0003DMT400015933	1.0594	0.159051	5.94915	14.3572	16.6084	15.2192	0	4.7452	10.1712	6.76923	8.09253	1.27616	11.1083	1.96664	3.4567	23.7229	13.95	8.14319	3.70955	3.30958	3.63125	2.65507	9.26221	2.14356	7.71947	0.749298	10.8557	0.933423	0.74552	1.34195	3.5716	3.13889	8.85471	12.5014	8.64188	12.8595
MSTRG.555	PGSC0003DMT400015956	3.86647	7.41228	10.5139	10.6116	9.17657	13.3059	9.61946	13.0077	12.8601	11.9801	9.4933	7.21827	10.2713	7.65754	12.2402	13.3556	10.3447	14.5307	9.33354	9.4602	12.3531	8.45041	10.6365	10.9135	9.86104	15.1239	8.46845	4.69641	10.4603	9.72335	10.3695	9.98372	12.539	9.75944	14.3456	11.1403
MSTRG.570	PGSC0003DMT400015945	11.7136	9.984	8.91207	7.45999	10.3276	1.83248	4.19592	7.93636	4.33448	0.943836	10.2875	7.59875	5.77881	8.05532	4.93674	11.3255	9.31822	10.7307	1.37517	1.58014	1.06199	1.88946	4.71753	4.50331	6.33293	10.2039	5.74304	6.73275	8.71234	4.77722	3.41946	3.7716	6.22791	4.97449	4.2647	4.42771
MSTRG.571	PGSC0003DMT400015982	5.07657	2.58571	2.87196	3.79671	2.50651	2.39857	1.62943	2.23334	1.46431	1.30873	1.09562	3.20408	2.27565	3.48881	1.15285	3.65797	3.26802	3.02658	1.03505	0.349331	0.115952	0.85938	1.22845	0.594254	1.53195	1.55414	1.47168	1.89692	0.701877	0.306127	2.15257	0.972739	0.863134	1.516	0.834419	1.02436
MSTRG.573	PGSC0003DMT400015974	1.98506	1.87078	0	0	0.421603	0.818866	0.68108	0.755539	0.549411	0.243457	0	1.50143	1.46408	0.673398	1.13623	0.686632	0.875387	0.590015	1.16329	0.192139	0.24928	1.08798	0.719086	0.894069	1.34124	1.34717	1.41555	0.658481	0.823595	2.11114	0.83534	0.146518	1.21191	1.06232	0.177155	0.927359
MSTRG.576	PGSC0003DMT400015950	0	0.193054	0.36024	0.132544	0.39446	0.540711	0.164145	0.494607	1.10908	0.960237	0.086959	0.125909	0.327368	0.582944	0.179113	1.6726	0.791615	0.905137	0.197995	0.178389	0.327504	0.627084	0.261541	0.285505	1.14759	1.3938	0.98088	0.082337	0.346289	0.378315	0.717211	0.270673	0.420073	0.45024	0.357269	0.645836
MSTRG.572	PGSC0003DMT400015969	1.00501	0	0	0.036408	0	1.96532	3.41738	0	1.4741	1.92425	0	6.22103	2.66096	7.18774	1.92067	0	0	6.27608	0	5.68572	1.50204	1.24994	1.7872	0.109635	1.96001	1.43844	2.18263	5.41124	0	0	2.56683	6.20015	1.44415	2.35168	3.39421	0
MSTRG.575	PGSC0003DMT400015948	6.82738	11.8011	3.83964	4.20955	2.82341	5.48639	4.34368	5.99513	4.30093	3.52429	6.81396	6.71801	5.55661	4.59611	6.18736	6.16762	2.91033	8.23406	8.17589	6.94323	4.13751	7.06214	4.57121	6.4905	5.64609	4.34584	6.41062	4.5969	8.49149	7.95607	5.12787	6.53977	6.95584	6.24827	5.16952	4.23688
MSTRG.577	PGSC0003DMT400015954	1.18305	1.93328	0	0.436659	0.425274	0	0	0.222218	0	2.43734	0	0	0	0	1.69548	0	0.501632	0.998707	0	0	1.85162	0	0	0.695319	0	0.003823	0	0	0	0	0.749829	0	0.87863	0	0	0.862091
MSTRG.585	PGSC0003DMT400046513	7.00977	4.39133	9.34416	4.99305	2.91314	3.83171	2.09659	2.02737	24.5882	1.56067	3.6991	33.414	1.30956	1.34399	2.78727	5.27041	19.1654	27.0815	3.23379	1.62786	2.10045	1.23464	27.7825	2.80022	3.28257	3.23129	18.7219	2.30984	6.93051	6.90201	3.9408	2.483	1.32162	1.08558	5.04918	1.17151
MSTRG.583	PGSC0003DMT400003010	0	0	0	0	0	0	0	0.859273	0.323832	0	0	0	0	0	0	0	2.0725	0.739422	0	0	0	0	0	0	0	0	0	0	0	0	0	0.094845	0	0.081781	0	0
MSTRG.582	PGSC0003DMT400003012	33.2834	30.7048	33.0568	29.841	27.6889	33.0511	19.2259	30.3427	31.1209	42.3704	35.4134	33.1844	18.8643	21.9328	26.7772	22.1824	16.6435	23.6455	31.4899	31.5877	31.4034	28.1598	32.1732	39.5291	21.1438	27.5531	27.1392	32.5098	27.8978	18.3867	31.9454	32.5679	26.8042	28.8478	25.1472	37.1108
MSTRG.586	PGSC0003DMT400065832	11.2628	10.5749	17.4565	8.97091	9.76596	10.0436	7.9417	13.2991	12.558	22.462	19.7563	11.4126	7.1867	7.5729	9.48654	7.50433	7.36656	9.63978	6.95819	21.9122	18.7822	8.07692	9.17675	8.76751	6.99712	9.43911	9.76171	11.2934	8.22433	6.8744	9.59928	8.00767	10.1426	11.257	9.84139	12.2476
MSTRG.587	PGSC0003DMT400065839	10.1107	9.78144	23.6599	4.8353	9.08632	5.21945	4.07548	12.8768	10.6159	21.2112	29.1097	9.50796	4.42804	5.66073	7.40068	7.33013	5.42638	5.66323	11.1918	23.0143	19.1988	6.51729	10.1814	5.88185	5.54312	12.0265	5.69357	10.7168	7.8144	11.2782	4.81582	5.66808	5.8779	16.2174	9.80375	13.565
MSTRG.591	PGSC0003DMT400006012	0.522197	1.02351	0.749212	0.556392	0.186991	0.229046	0.484693	0.162763	0.073482	0.192787	0	1.34379	0.067768	0.094878	0.319398	0.081261	0.304818	0.197613	0.317151	0.329549	0.183455	0.302803	0.363709	0.588561	0.132765	0.107258	0.927302	0.908846	1.39963	2.60704	0.587441	0.151002	0.384988	0.266319	0.174943	0.024815
MSTRG.590	PGSC0003DMT400065837	29.4974	49.7245	4.17859	7.57112	8.30397	7.03202	4.15813	6.70717	7.38898	7.12284	4.82679	26.5448	19.1179	8.63983	10.5364	11.3133	8.5148	11.1208	1.59179	5.6458	4.08585	11.9026	11.0147	7.48386	9.6749	1.72677	15.3615	24.0835	24.8809	28.4325	8.1956	10.1042	4.51567	9.96088	15.8023	8.72701
MSTRG.593	PGSC0003DMT400006011	1.32436	2.13242	3.53699	5.29925	7.95014	6.45631	2.31216	5.63768	3.15603	25.1687	11.9522	2.05578	4.77674	1.71671	5.72895	5.01115	5.75963	5.4301	1.46407	9.46265	10.7385	3.50155	3.36505	5.94965	4.02278	3.50506	5.78201	1.04696	0	1.76433	4.14807	4.8348	3.91126	3.61071	6.06605	5.11053
MSTRG.595	PGSC0003DMT400024877	1.24708	1.5994	6.33865	1.42795	1.38158	1.23175	0.906293	1.46857	1.12858	8.95588	6.47708	1.27932	0.745422	1.84245	1.17762	0.677971	0.858366	0.718079	1.15853	7.17294	9.47944	1.32821	0.941815	1.40819	0.84424	0.857598	0.447051	1.71927	0.941138	1.07717	1.47727	0.990562	1.40655	1.06628	0.774816	1.12336
MSTRG.592	PGSC0003DMT400006010	3.20721	30.2041	5.68819	17.4272	25.574	29.4089	5.83501	17.5671	28.4112	28.6638	4.21397	0	30.1278	25.9163	1.16247	20.7076	14.943	21.8641	15.8342	0	25.1856	17.9945	35.9805	19.253	27.7362	31.9151	31.7809	27.464	8.71201	0	1.92401	10.889	0.821363	30.2345	29.7739	21.7212
MSTRG.596	PGSC0003DMT400024865	0	11.9267	16.8831	5.93806	7.34014	7.04552	1.50284	9.43972	6.90432	5.90839	8.60304	8.36682	0	6.56084	4.81998	6.76091	0	5.91843	12.1573	9.11258	2.30629	5.97692	5.33949	5.66964	7.73715	0.945861	7.19401	10.0306	9.76852	10.4735	0	2.92262	6.44597	0	6.31279	6.83136
MSTRG.588	PGSC0003DMT400065835	19.4887	10.7844	5.67476	3.57558	3.49271	3.28449	2.40019	5.54694	2.64876	5.8044	6.86972	1.55488	2.74473	2.84342	4.51462	1.96486	4.19304	4.55701	1.79641	7.95629	8.69835	3.3403	5.39318	3.69962	6.16957	5.5613	1.12617	12.2096	6.83706	0.40076	7.03877	3.27402	3.42167	5.92089	6.70785	3.66186
MSTRG.589	PGSC0003DMT400065840	76.8516	121.131	1.79382	1.35965	8.5962	1.73386	11.8851	16.1146	14.1352	23.4829	31.8883	135.149	1.1106	8.48531	10.8473	15.4418	0.66365	6.40687	0.197228	26.5454	21.4342	9.09305	6.34633	5.97445	5.02382	7.79588	10.6898	83.6063	49.9733	0.277779	6.94663	9.43296	6.2437	8.9469	13.1841	13.2667
MSTRG.589	PGSC0003DMT400065836	10.6726	4.71186	14.6663	9.18009	0.68085	9.23947	1.32476	0.699162	0.566815	0.965012	1.15587	6.12501	10.9994	1.37135	0.388303	0.956194	6.8247	1.64142	4.20163	1.58603	0.318439	0.391098	1.88274	0.461992	0.860025	0.946159	2.02989	4.50711	3.36231	9.92784	0.703158	0.593616	0.617844	0.731066	1.26599	3.5635
MSTRG.599	PGSC0003DMT400024878	54.8268	41.1044	38.1791	24.2434	22.1729	36.0335	24.0541	27.535	35.2515	42.1265	35.8219	47.0283	35.0372	26.2845	33.4839	27.7034	31.6576	32.6519	51.5524	32.3944	41.8162	34.6744	43.214	21.8836	30.0747	43.5686	27.2779	39.6329	36.8699	50.897	26.9262	24.4619	35.253	39.5003	24.4101	30.8281
MSTRG.602	PGSC0003DMT400002287	18.9537	18.1216	3.24846	12.0361	29.4167	29.6094	11.7801	36.3352	14.6142	20.6938	22.7246	17.4476	22.6453	31.0465	32.189	11.6597	17.6991	12.5004	9.11846	9.72706	19.0014	36.3286	37.8362	31.1126	17.6242	14.874	24.7689	15.9587	11.2793	14.9274	33.3426	34.9734	22.1318	15.0947	24.7097	26.9172
MSTRG.605	PGSC0003DMT400002284	8.04031	9.49125	8.82113	7.82393	8.77279	9.29896	5.04144	7.85673	5.95349	6.51343	4.31322	13.3865	8.2652	7.29866	6.06526	8.50795	8.86966	6.73837	16.591	6.0157	5.49979	5.81863	5.42786	6.74931	7.43733	5.225	1.77639	14.9192	14.2148	13.1159	8.77466	5.13607	9.34116	7.52673	8.25369	7.87589
MSTRG.606	PGSC0003DMT400002256	3.33318	7.15411	5.60977	5.80193	5.01497	4.58115	7.57833	5.28071	3.79192	5.44967	5.9277	5.83604	4.78952	4.46917	5.58857	2.42474	2.92714	5.13626	5.42146	6.05204	6.77257	5.44045	4.6027	4.91433	3.89078	2.85426	3.76227	3.84734	5.11962	3.74964	3.79294	3.66233	4.31801	2.39798	2.54071	3.96468
MSTRG.610	PGSC0003DMT400002245	0	0	0	0	0.834533	0	0	1.68665	0	0	0	0	0.205831	0	0	0	0	0	0	0	0	0	0	0	0	0	0	0	0	0	0	0	0	0	0	0
MSTRG.610	PGSC0003DMT400002249	0	0.599726	1.01101	8.49604	12.8396	6.35177	3.30793	3.85999	2.94361	0	0.205103	0	5.47443	13.4653	5.07356	8.72029	6.54807	4.64366	1.71876	1.14332	1.60576	6.09689	2.95366	5.83209	9.06437	1.50675	3.98893	0.912049	1.66552	1.1516	6.99725	10.2779	7.3479	8.86279	5.46296	3.91155
MSTRG.608	PGSC0003DMT400002280	35.8057	60.3112	48.5495	17.8946	17.385	25.0677	28.1137	34.7002	33.8837	71.3553	66.476	77.8304	0	14.833	19.4452	16.4788	12.8124	14.2946	16.3525	84.4728	80.504	17.4577	26.4281	19.7667	15.9274	23.1582	11.3759	46.3082	36.0098	49.5015	21.4947	18.822	26.4232	21.2209	28.6178	34.1625
MSTRG.609	PGSC0003DMT400002254	13.3213	13.8052	13.0946	23.7252	21.2001	27.1646	21.4413	22.7212	23.2034	11.2051	13.6833	13.4377	17.681	17.7962	20.7795	16.0478	15.9121	18.1777	19.9281	8.13774	10.6433	15.1996	21.4521	19.8613	19.232	22.9039	18.2364	17.7435	17.6215	15.928	27.0194	23.3218	30.5963	18.5197	23.448	23.7383
MSTRG.612	PGSC0003DMT400002240	551.166	435.824	571.337	622.461	528.206	571.545	656.875	528.589	457.672	445.63	445.574	551.524	531.092	581.607	497.459	630.794	642.101	626.335	648.249	406.313	415.487	361.226	352.976	529.169	536.238	462.165	552.397	560.833	569.792	576.399	538.114	516.608	600.701	358.425	646.329	536.363
PGSC0003DMG400000866	PGSC0003DMT400002265	0	0	0	0	0.970833	0.620074	0	0	0	0	0	0	0.989322	0	0.931812	0	1.12859	0	0	0	0	0	0	0.172703	0	0	0	0	0	0	0	0	0	0	0	0
MSTRG.617	PGSC0003DMT400002229	16.298	18.9205	23.515	19.5303	20.1415	22.0681	19.0044	25.4218	22.8572	25.6724	28.0799	18.5064	18.2386	20.6823	20.5145	21.1612	14.6684	20.5124	17.831	22.2838	24.2063	17.6183	20.7126	22.2462	17.9082	21.253	19.8869	19.1542	15.4393	12.0237	21.9663	22.0285	21.8448	18.4119	24.6972	26.6673
MSTRG.615	PGSC0003DMT400002261	4.26341	1.09219	6.99739	8.53195	5.19648	5.66238	10.7021	17.0774	17.7361	13.6478	2.84859	2.14929	17.387	8.84851	7.85572	6.6703	6.81427	8.9354	3.8206	5.61452	8.21402	9.24759	8.80898	13.7063	3.89436	7.59522	0.039637	0	3.11708	7.41882	7.1897	8.14151	8.1442	3.74876	10.9608	10.0289
MSTRG.616	PGSC0003DMT400002232	3.88567	0.312276	0.401179	0.099291	0	0.229629	0.022019	0.084631	6.24703	0.547562	0.034532	2.96674	0	0.285515	0	0	0	0.030413	0.283982	4.24864	3.77297	0.172435	1.69647	0.109309	0.224653	0.537119	0	0	0.086465	2.50415	0.25568	0.034571	0	0.115572	4.27899	0.40689
MSTRG.635	PGSC0003DMT400053823	1.1065	0	0.135682	0	0	2.21389	0	0	0.08134	0	0	0.220841	2.67312	0.578468	0.387533	0.237077	0.227005	0	1.94534	0.120425	0	0.136343	0.214476	0	0.48977	0.173131	0.579051	0.164072	0.208285	0.097401	0.376768	0.63625	0.072139	0.177715	0.273962	0
MSTRG.644	PGSC0003DMT400036456	0.609854	0	1.51855	4.62645	1.40902	0.835336	1.37617	0.303139	1.32586	0.389375	0.86416	0.43876	0.932239	0.651786	0.583598	0.778742	0.356937	0.955511	0.342449	1.74734	0.621923	0.345276	0.390028	0.986513	0.660106	0.392564	0.476013	1.89915	0.091958	0	0.394245	0.625632	0.811339	0.780374	1.80698	0.474137
MSTRG.643	PGSC0003DMT400036458	1.35562	0.729794	1.23661	2.30263	3.24716	3.72209	1.62721	2.03948	1.55911	3.38762	3.23659	1.69411	1.11794	1.95541	0.759797	2.42746	0.387751	1.37104	0.642832	1.71038	1.1372	1.59331	0.96307	1.12094	1.52867	2.14098	0.54173	4.26404	0.171252	0	2.47646	2.36704	1.49518	0.931913	2.38527	1.82713
MSTRG.647	PGSC0003DMT400036461	12.0653	9.49547	17.7366	9.35889	8.82061	8.67126	9.94229	10.1425	11.1435	20.6549	19.3108	9.2171	8.59658	9.45641	8.57122	9.28843	8.30087	10.749	8.74346	24.7627	20.0087	9.72612	9.43678	7.8802	7.39377	8.94536	6.37086	6.85685	9.73441	8.57798	10.6515	9.40536	10.1011	12.02	10.476	12.483
MSTRG.648	PGSC0003DMT400036462	1.72461	1.87549	0.726587	2.26979	1.91923	2.31054	2.75253	2.13504	2.44537	1.03919	3.43795	2.70775	1.39283	1.8334	0.948415	2.15976	0.57437	0.868063	1.63552	2.26222	2.62113	2.34593	0.879913	2.064	1.23526	2.56413	1.50272	1.9148	1.53229	0.075119	3.11967	2.10587	0.736737	1.54854	2.29142	1.68067
PGSC0003DMG400019846	PGSC0003DMT400051106	0	0	0.408063	0.335747	1.20711	0.262711	1.24739	0.507785	0.508305	0.2887	0.633847	0.332093	0	0.347345	0	0.557733	0	0.193649	0	0.467332	0	0.142953	0.472792	0.486968	0.388313	0.384676	0.32693	0.42909	0	0	0.176221	0.166347	0	0.56408	0.836704	0.806451
MSTRG.686	PGSC0003DMT400061995	16.1325	6.37807	7.44185	5.50408	7.49049	6.60735	7.29721	6.20122	11.5045	10.1856	11.001	8.28339	8.0053	5.8334	10.0154	6.41882	9.3635	11.4676	9.06139	8.98127	8.51738	10.368	8.62755	7.74083	8.37261	10.7638	6.31132	5.85621	9.01256	4.77305	8.3748	8.06777	11.4647	7.01953	9.31121	9.30754
MSTRG.681	PGSC0003DMT400061998	0	0	0.383279	0.128717	0.476241	0.098702	0.30845	0.96226	0.165339	0.953126	0.152004	0.310677	0	0.182984	0.049159	0.770356	0	0.444791	0.125396	1.39776	0.4869	0.120844	0.408382	0.510602	0.197407	0.209312	0	0.286093	0.07845	0.339921	0.393388	0	0.139736	0.660086	0.326446	0.075747
MSTRG.661	PGSC0003DMT400051098	1.02625	1.0689	0.554407	0.421374	0.233478	0.374604	0.434825	0.303022	0.397739	0.773684	0.784847	1.24759	0.375419	0.41856	0.181142	0.742843	0.377103	0.58007	0.624562	0.255185	0.504079	0.588916	0.201478	0.152125	0.622511	0.324945	0.232509	0.569013	0.550489	0.329706	0.339944	0.221722	0.401141	0.541468	0.26667	0.534604
MSTRG.671	PGSC0003DMT400046352	6.69697	5.22476	3.01155	4.5316	4.9418	5.99636	4.36119	4.38309	4.9475	3.79665	4.2294	5.99066	3.45441	2.99504	4.99494	4.13543	3.83226	4.8904	5.64807	3.32953	2.81509	4.40817	5.42301	4.83078	2.27878	3.69502	3.50587	4.98778	2.34436	1.31018	4.32958	3.01197	5.90792	4.48823	4.49645	4.2183
MSTRG.677	PGSC0003DMT400062007	3.14647	4.05351	2.14941	4.53852	1.4661	1.03784	3.53663	0.995571	1.67113	1.6078	5.07017	2.13408	0.71799	0.914792	0.786043	0.417298	0.711517	1.01481	2.81004	0.603088	1.76803	0.735334	1.25871	0.641256	0.923826	2.40001	1.3794	1.4465	1.56729	3.16973	1.10458	0.363626	1.59011	1.34948	0.86343	0.430095
MSTRG.666	PGSC0003DMT400046356	0.204259	0.979873	0.103142	1.22883	0.630062	2.32325	13.2279	9.33794	4.99254	1.28497	1.95461	2.60075	1.90316	0.666757	3.85925	2.38635	0.806429	1.27695	0.106841	0.753735	0.302832	1.49336	6.51323	1.9303	0.926193	2.67834	0.497898	0.118786	0	0.181243	1.55733	1.25137	3.19573	2.48187	3.52513	1.93344
MSTRG.678	PGSC0003DMT400062000	3.01076	3.5054	3.2591	4.06279	4.09102	3.55967	4.10679	4.28034	4.12646	4.37044	2.7069	4.49168	3.36847	3.50896	3.10029	3.54847	3.63714	3.77151	4.39513	3.57567	1.96982	3.79741	4.21603	3.7185	2.58556	3.53476	2.50729	3.97905	1.94304	3.04462	3.74061	4.64861	2.6055	4.06102	4.38498	4.09831
MSTRG.680	PGSC0003DMT400062010	2.37139	1.51336	1.61033	3.60778	2.42479	1.89358	1.46736	0.795749	2.64136	3.12016	2.85568	1.80815	1.60315	2.6478	1.78811	1.93543	2.22622	1.62181	1.94253	1.2868	1.11332	2.28083	3.02738	2.02467	2.91837	2.50587	2.81539	1.33286	0.697022	0.148299	2.26394	2.17494	1.7335	2.29745	1.64506	3.1141
MSTRG.662	PGSC0003DMT400051095	1.49231	1.72379	0	0.282432	0.114862	0.288765	0.173137	0.883759	0.639335	0.247916	0.455824	0.344951	0.874294	0.23084	0.48684	0.660942	0.893094	1.62412	1.02058	0.380122	0.684843	0.316716	0.430242	0.35372	0.675106	0.26536	0.584865	0.640429	0.284598	0.318766	0.431946	0.114278	0.877589	1.51358	0.891681	0.68047
MSTRG.700	PGSC0003DMT400059131	2.87594	2.41727	6.58209	2.83797	5.97223	6.68738	5.86617	7.2442	4.76578	7.74644	5.13116	3.26826	4.29638	4.24218	3.11272	3.37127	4.21704	4.09784	1.06005	4.18198	4.95624	1.66342	1.54826	2.85659	1.33536	0.683931	1.85682	1.03063	1.04364	3.17096	2.50721	3.39769	2.93344	1.3084	1.79741	1.7558
MSTRG.702	PGSC0003DMT400059129	0	0	0	0	4.32681	0	0	0	0	0	0	0	0	0	0	0	0	0	2.92804	0	0	0	0	0	0	0	0	0	0	0	1.5323	2.33897	0	0	0	0
PGSC0003DMG400015059	PGSC0003DMT400038934	0.15802	0	0.191884	0.558273	0.272818	0.244625	0.139262	0.123459	0.238243	0.280025	0.313941	0.066486	0	0.175779	0.333495	0.147539	1.12155	0	0.454603	0.036264	0.178537	0.129992	0.358095	0	0.602633	0.06114	0.155318	1.49764	0.38303	0.233801	0.328178	0.384141	0.344015	0.343747	0.092706	0.093866
MSTRG.710	PGSC0003DMT400038933	27.3782	26.8555	21.812	25.0399	23.9886	26.8477	26.1276	27.4059	28.4317	28.7106	26.4427	24.7281	23.784	20.9475	22.1207	25.9869	22.9445	29.7584	20.7074	22.8964	21.9281	23.2676	20.8622	21.3528	25.7607	25.5659	20.0984	22.5608	14.4477	10.9909	27.597	25.0073	21.3297	21.0662	24.5204	24.7152
PGSC0003DMG400041047	PGSC0003DMT400091476	0.581215	0.634437	1.27878	0.195561	0.704648	0.811281	0.181641	0.479866	0.194731	0.336454	0.192453	0.145332	0.305129	0.538778	0.407515	0.547489	1.25684	0.302286	0.101338	0.36546	0.572319	0.40375	0.242498	0.401511	0.227812	0.164053	0.761701	1.063	0.283275	0.1911	0.896254	0.268719	0.392761	0.073332	0.314575	0.202547
MSTRG.713	PGSC0003DMT400041003	0.471267	0.627047	1.21218	0	0.178067	0	0	0	0.439853	0.391624	0	0.41285	0	0.786419	0	1.74787	0	0.537618	1.8046	0.782176	0.821418	0	0	0.573387	0.215132	0	0.53528	2.58677	0.714084	0.276988	0	0	0.230659	0.386168	0.206103	0
MSTRG.719	PGSC0003DMT400038248	3.0514	19.1162	0	0	0.402765	0	0	0	0	0	1.65511	6.11605	0	0	0	0	0	0	0	0	0	0	0.529839	0	0	0	0	2.59243	0.861125	1.18186	0	0	0	0	0	0
MSTRG.716	PGSC0003DMT400040999	22.1086	4.95521	32.4595	31.5051	27.4786	22.2738	7.41996	11.5024	30.4685	26.2866	5.24742	26.8354	10.0102	7.89747	31.3397	22.3051	30.7465	15.752	6.57936	28.0285	12.7451	16.2995	28.5604	21.1378	25.3726	23.3819	20.1507	15.2904	7.96719	23.1483	33.2015	21.3111	23.9644	9.2273	18.1736	14.6558
MSTRG.712	PGSC0003DMT400041005	88.3983	87.6653	98.3694	102.782	104.29	102.546	79.5228	132.407	107.645	153.781	129.528	113.634	68.2177	81.2851	82.9133	95.3682	63.3265	92.9405	89.0957	108.265	96.1875	73.3336	75.2632	96.4637	84.0408	123.821	112.78	127.733	90.6486	37.6922	102.856	89.3239	70.6274	77.9064	90.6021	164.739
MSTRG.721	PGSC0003DMT400038240	5.13442	7.97746	26.7282	4.40614	2.88214	3.52685	2.82953	3.28243	4.37067	42.7721	37.4249	8.97951	6.24013	4.88763	6.4006	6.23413	3.93765	5.75465	9.90117	35.05	42.8077	8.82308	10.7813	4.15401	8.48284	5.82515	5.68245	6.06487	3.71866	5.67936	4.70731	3.60327	4.95169	6.19557	3.0676	1.9926
MSTRG.724	PGSC0003DMT400008432	4.39669	6.44607	13.1119	2.93766	2.84389	4.51054	0.767001	1.41358	2.82605	1.01153	0	3.21842	0.577516	1.39433	2.85639	1.20965	0.971258	3.69231	51.9294	5.64775	7.03935	0.886337	2.28574	3.52168	1.25771	5.32894	1.84963	3.37459	134.465	49.1478	6.90101	3.84671	2.9863	0.912207	1.86822	3.67825
MSTRG.734	PGSC0003DMT400061697	15.3321	24.9897	14.8028	20.3833	20.1869	21.0013	20.26	12.9538	17.9835	20.6721	11.0163	17.9219	19.3642	19.3888	18.0644	18.4662	17.2823	20.9348	11.353	13.5797	16.3036	26.0134	28.5347	17.5765	23.526	23.2295	15.8994	17.5068	14.6337	11.2941	25.8184	20.0745	20.4935	21.8351	18.7623	12.312
MSTRG.733	PGSC0003DMT400061700	765.865	641.194	688.984	535.902	520.256	481.014	368.675	404.602	451.417	509.519	466.832	780.25	513.794	596.391	567.347	400.433	334.015	422.051	806.781	526.986	513.815	576.852	594.657	763.044	402.535	419.735	456.685	798.042	834.765	561.369	535.094	565.075	445.349	359.836	357.78	434.377
PGSC0003DMG402020860	PGSC0003DMT400053771	0.505472	0	0	0	0.262895	0.836902	0	0.880702	0.016301	0.479006	1.07404	0.528964	1.00129	0.526195	0.741611	1.1357	0.632568	1.52492	0	0.186092	0.664651	0.763145	0.848566	0.25855	0.482438	1.16205	0.228487	1.07303	0	0	0.140343	0.13248	0	0.443356	0.640729	0.24085
PGSC0003DMG400020859	PGSC0003DMT400053768	0	0.774984	0	1.46757	0	0	0	0	0	0	0	0	0	0	0	0	0	0	0	0	0	0	0	0	0	0	0	0	0	0	0	0	0	0	0	0
MSTRG.744	PGSC0003DMT400028308	94.8237	89.8494	80.0222	140.863	133.606	151.153	185.112	195.354	183.41	72.6347	67.1307	92.8642	108.034	118.973	120.298	142.121	98.4833	115.61	93.4854	66.5769	71.9302	105.658	109.72	136.872	114.01	108.9	109.233	79.3144	68.3461	66.3721	149.733	151.942	130.434	125.688	176.563	180.485
MSTRG.752	PGSC0003DMT400046138	2.10658	0	0	1.03528	1.17698	1.36642	0.217956	0.684939	1.18684	0.908758	0.748752	0.481588	0.591352	1.85526	1.2465	1.57559	0.892134	0.982464	0.709437	0.57992	0.639517	1.33237	0.319389	0.980312	1.24368	0.836485	0	1.58954	0.359847	0.484793	1.76538	0.924711	0.764344	0.663212	0.44021	1.54204
MSTRG.757	PGSC0003DMT400020061	0.152503	0	0.887431	0	0	0.94434	2.25623	0.87715	1.18693	0.270251	0	0	0	0	0	0	0	0.170471	0	0.209984	0.043401	0	0.23091	0.072935	0.058159	0.059601	0.146897	0.275704	0.281466	1.13822	0.237541	0.074744	0.213909	0.265397	1.16039	2.13912
MSTRG.756	PGSC0003DMT400046124	0.950278	0.468652	0	1.38602	0.690807	0.698294	1.99953	1.60373	1.77112	0.509287	0.765619	0.690221	0	1.14314	0.695027	1.26848	0.596821	0.697571	0	0	0.121446	0.953315	0.713527	1.26554	0.549114	0.74936	0.612512	0.259511	0.263973	0.428081	0.822946	0.913425	1.08477	1.05585	0.797638	0.972566
MSTRG.754	PGSC0003DMT400046130	0	3.89713	3.43596	0	0	2.03653	1.48218	0	0	0	0	2.38645	0	1.48908	3.21027	0	0	0	1.08215	0	0	0	0	0	0	0	0	0	0	1.44798	1.95161	0	0	0	0	0
MSTRG.759	PGSC0003DMT400077470	0	0	0	0	0	0	0	0	0	0	0	0	0	0	0	0	0	0	0	0	0	0	0	0	0	0	0	0	1.93447	0	0	0	0	0	0	0
MSTRG.763	PGSC0003DMT400041324	1.1396	0.498582	0	0	0	0	1.0542	0.550956	0.465177	0.336579	0.373573	0.538942	0	0	0	0	0	0.221157	1.68892	0.588424	0.162162	0	0	0	0	0.146976	0.373371	0.12006	1.51203	1.69799	0	0	0.104067	0.082634	0.112554	1.13915
MSTRG.764	PGSC0003DMT400041323	3.21459	0.83462	5.24511	9.06684	12.4289	14.6307	13.2712	5.63288	11.2029	3.46653	0	7.98218	9.04844	4.95	6.18949	8.54746	6.86881	9.66875	3.11279	6.0636	3.86772	6.71505	7.4578	7.71429	3.60982	4.2833	0	2.03631	6.09829	8.118	5.14259	7.94071	8.451	6.97403	11.036	6.34902
MSTRG.766	PGSC0003DMT400041321	1.86117	5.93164	8.15487	16.0567	19.197	15.8218	13.717	19.5456	14.6953	13.5127	10.1289	6.28241	7.9524	14.421	14.7574	9.19351	2.85091	8.93417	14.3261	18.393	18.3524	14.8055	18.8041	33.9462	11.7842	10.2982	9.09307	5.80793	11.3238	20.5059	20.9274	23.4746	23.8369	15.6012	14.0459	21.5205
MSTRG.737	PGSC0003DMT400061684	2.47852	7.08754	0	0.480473	0.428945	0.451315	1.37616	3.47655	1.15551	0.978864	0.323621	4.46664	0.01389	0.389472	0.046774	2.15535	0	0.01355	0.240438	1.49684	2.00101	0.278593	0.869622	0.106592	3.68213	5.30351	1.43837	0.960126	0	0.0145	1.98273	1.18004	0.012976	1.19348	1.44451	4.02982
MSTRG.777	PGSC0003DMT400013860	0.358736	1.62677	4.73573	42.6096	66.3728	51.6501	83.645	70.1563	115.949	1.66239	6.35737	1.73222	6.8918	16.7103	31.2121	24.7657	24.8785	18.4711	7.6718	6.20274	4.81629	25.4105	44.0549	36.742	21.8676	14.7527	43.5569	1.57827	1.42902	3.82689	32.7943	51.9949	38.6285	70.975	72.8479	120.554
PGSC0003DMG401017962	PGSC0003DMT400046264	0	1.36657	0.552681	0.324163	0	0	0	0	0	0	0	0	0	0	0.412377	0.225386	0	0	0.31235	0	0	0	0	0	0	0.318347	0	0	0.714968	0.476215	0	0	0	0.278952	0	0
PGSC0003DMG400017963	PGSC0003DMT400046270	0.811559	0.658109	0.834961	0.761298	0.797334	0.938558	0.682365	0.708255	0.680582	1.00669	0.615361	0.47566	0.313693	0.84746	0.383517	0.389048	0.221117	0.476291	0.781005	0.693268	0.409913	0.566956	0.546794	0.856913	0.611272	0.174792	0.610246	0.726092	0.064088	0.171254	0.702762	1.13247	0.766605	1.02246	0.637895	0.688101
MSTRG.776	PGSC0003DMT400006199	34.4407	41.399	30.0665	23.3553	7.31925	0	15.3694	23.6874	16.3129	34.5969	37.7816	42.4206	32.2462	20.681	21.8478	31.9948	21.4791	9.83342	35.9261	0	36.543	19.1093	18.0837	13.1677	27.9277	32.5829	24.6511	35.3826	31.3323	0	22.7536	21.662	24.9975	18.9374	19.0115	21.6586
MSTRG.784	PGSC0003DMT400074290	2.26411	2.11232	0.776907	1.93052	1.43693	1.97549	1.77326	2.21843	1.90923	1.43426	1.24823	3.92181	2.26257	1.66213	1.48056	3.082	1.73288	2.82725	1.03273	1.13907	0.994781	1.6124	2.58199	2.06366	3.46156	4.33778	3.21489	3.01566	0.974332	0.215139	3.04658	1.54723	1.48757	2.03458	2.51268	2.34611
MSTRG.783	PGSC0003DMT400085560	0.257096	0.108294	0.135142	1.20704	0.313116	0.46279	0.280279	1.29372	0.129206	1.27673	0.650942	0.053821	0	0.531404	0.651948	0.558239	0	0	0.312739	0.371832	0.096196	0.318716	0.66086	0	0.456488	0.53113	0.055242	2.47701	0.03384	0	0.348715	0	0.054599	0.875753	0.354311	0.266369
MSTRG.790	PGSC0003DMT400074279	24.6908	22.768	25.515	51.0514	52.2411	57.9539	48.0591	58.0201	57.0211	33.0561	26.461	27.1249	44.0986	46.1887	52.8658	45.9384	28.7898	42.1215	27.4111	30.2348	27.8141	44.6743	54.7606	51.817	39.1697	47.4629	33.006	26.5229	20.4872	16.3795	58.4089	57.0148	50.034	39.4764	59.6953	56.5438
MSTRG.799	PGSC0003DMT400097349	0.508232	0.638056	3.5353	0.526819	1.00946	0.401533	0.465643	0.523001	1.16233	2.90794	4.27299	0.317107	0.230686	0.430156	0.5004	0.324207	0	1.09565	1.49706	5.00935	3.41414	0.331699	0.53957	0.301943	0.416535	1.14097	1.27729	0.450963	0.793649	0.27712	0.735356	0.051572	0.246756	0.754904	0.871728	1.28978
MSTRG.803	PGSC0003DMT400068406	0.817864	1.16679	0.699995	1.22886	0.736116	1.12889	1.05376	0	0.726734	0.853949	0.691566	0.899918	0.922887	0.324375	0.774887	0.990603	0.868299	1.26802	0.623895	0	0.649451	0.574667	0.890317	0.700143	0.397717	0.971779	0.605939	0.685028	1.10923	0.898137	0	0.31292	0.785171	0.519317	0	0.37697
PGSC0003DMG400006515	PGSC0003DMT400016670	0.899069	0.580993	1.05087	0	0.79531	1.25974	0.755	0.619371	0.744811	1.17015	1.30084	1.62726	0.829903	0.968573	0.458309	0.569743	0.746501	0.814927	1.12172	0.921194	1.32046	0.758511	0.855115	0.117214	0.71949	1.00732	1.34433	0.511669	0.72106	0.622256	0.546006	0.52408	1.06202	0.652789	0.842527	0.695565
MSTRG.813	PGSC0003DMT400080782	0.861784	0.892803	1.05854	0.125526	0.644091	0.240637	0	0.570548	0.656209	1.70786	0.741178	0.182516	0.352538	0.103749	0.780344	0.696644	0.718632	0.512587	0.814378	2.98019	3.41627	0.603971	0.910067	0.356841	0	0.27994	0.344686	1.85827	0.344273	0.761728	0.193697	0.533907	0.332503	0.399281	0	0.88643
MSTRG.814	PGSC0003DMT400080772	3.17535	1.81875	1.26033	3.72142	1.97076	2.38225	2.83605	2.46342	2.4434	2.19062	3.08348	0.801637	1.81451	1.92332	1.92001	2.90264	1.78485	2.54013	1.99375	1.43003	1.51211	1.74371	2.2999	2.56755	1.92286	2.58527	1.8193	1.12967	2.72932	2.72791	1.79346	1.5171	2.29116	2.09765	2.79596	2.86495
PGSC0003DMG400044969	PGSC0003DMT400095398	0.717597	0.714277	1.04551	0	0.963546	0.566239	1.08828	0.79368	0.464584	0	0	0.856589	0	0.581275	0.519819	1.01819	2.93875	0.893066	1.20395	0.27162	0.720629	0.422663	0.635674	1.84333	1.09695	0.787491	0	4.47764	0.353839	0.836221	0.831702	0.981703	0.866596	0	1.80144	0.261181
MSTRG.830	PGSC0003DMT400014258	0.588836	1.82127	25.3389	2.02916	1.24635	2.67761	37.7776	34.7922	3.55422	0.438775	24.7873	40.5347	0	17.1503	0.606482	1.22263	25.7184	7.91614	4.36771	0	1.35795	2.69142	5.87492	28.935	0.84076	0.043689	6.31589	28.2641	26.0529	0	3.12207	3.64429	20.6009	5.7212	26.2568	4.72205
MSTRG.841	PGSC0003DMT400055365	0	0	0	0	0	0	0	0	0	0	6.81176	0	0	0	0	0	0	0	0	4.50952	0	1.83643	0	0	0	0	1.46234	0	1.28286	0	0	1.84994	0	1.56266	0	0
MSTRG.842	PGSC0003DMT400055361	17.223	11.5256	19.668	8.96506	10.5068	12.5585	7.54673	5.88565	2.32343	10.9729	9.62532	15.81	10.5798	13.6969	14.6869	14.8124	11.5772	10.0176	25.612	11.7305	14.1895	13.6297	14.8369	11.4667	12.7672	11.8929	13.411	14.8497	23.3065	22.0677	10.6798	10.2039	13.9783	8.89604	9.22119	5.76294
MSTRG.846	PGSC0003DMT400055353	3.44248	1.93792	0	0	0.304642	1.0762	0	2.0069	2.35425	2.12983	0	2.77259	0.790614	2.30605	2.29899	0	1.20994	1.94671	2.20644	1.43375	1.38237	1.91055	1.27723	0.473363	3.03689	3.10885	1.81485	2.05849	1.08729	0	2.51336	1.59063	2.24106	2.08813	0.325494	1.02761
MSTRG.843	PGSC0003DMT400055360	4.87256	1.7182	6.32644	4.84536	2.98433	2.94936	3.73158	0.318008	0.020739	2.38899	6.7797	7.38385	5.2567	3.03275	0.091853	0.142157	2.83071	6.23934	8.32724	7.0815	0.100396	0.994704	4.36596	1.01494	1.32033	5.64114	0.718276	4.61422	5.39781	0.160266	3.47702	1.72362	0.045684	1.53665	1.1499	3.65266
MSTRG.852	PGSC0003DMT400084995	2.25705	0.982532	2.15281	0.56957	0	0	0.677156	1.67588	0.279795	2.13984	1.65166	2.49552	1.06643	1.46458	0.719807	1.0888	0	0.328511	0.960213	0.502419	0.423946	0.430759	0.36453	0.176309	1.07308	0.585127	1.41981	0.708605	0.046286	0	1.17187	0.737475	0.395733	0.327324	0.934035	1.32285
MSTRG.865	PGSC0003DMT400051483	0	2.78425	5.75896	0	3.79933	3.1079	9.32793	0	2.33821	7.86886	0	1.53332	0	10.6786	10.4115	3.38718	9.55314	13.0044	13.924	0	1.87567	0.712913	0	1.58746	0.574371	4.20444	0	0	12.4053	0	15.1749	9.72098	13.4382	7.09857	5.79362	2.14097
MSTRG.861	PGSC0003DMT400084231	592.868	295.193	467.691	160.006	71.9524	132.034	73.7215	68.8859	105.827	192.932	232.253	563.904	196.959	151.687	140.714	212.983	238.737	200.398	726.37	270.69	218.454	196.06	160.07	177.332	169.886	463.055	287.008	436.704	741.613	780.554	103.55	64.9828	238.526	90.4395	74.9797	220.61
MSTRG.863	PGSC0003DMT400084232	3.07693	4.16907	8.81416	2.14701	0.701903	3.75382	1.69061	2.52102	2.64851	2.34544	0.39602	3.62768	3.65385	1.59693	2.45389	2.80571	2.81392	2.04708	9.38089	4.43473	4.56262	1.97586	2.73504	1.7344	0.865937	5.27839	2.16536	2.9575	4.86406	4.42723	0.800905	0.696002	4.70972	0.396297	0.48256	2.15502
MSTRG.870	PGSC0003DMT400033995	0.331313	0.468641	0.54654	0.469797	0.406765	0.244677	0.513677	0.431675	0.400917	0.790073	0.859896	0.609045	0.486823	0.424905	0.269212	0.625495	0.421196	0.609689	0.530435	0.644632	0.609671	0.447563	0.255932	0.179956	0.545201	0.750348	0.67048	1.18887	0.232962	0.304921	0.466307	0.350848	0.401659	0.59533	0.340854	0.418915
MSTRG.868	PGSC0003DMT400033988	1.66619	1.27026	0.721207	0	1.57444	0.748495	1.21581	0.96766	1.29619	0	1.12749	0.824573	0.515867	0	0.995049	2.89144	2.8678	0.418868	1.39095	0	0.613246	1.39923	0.596564	1.27913	0.994792	0.987386	3.23342	3.50835	0.472606	0	1.48859	0	0.444304	0.383606	0.354852	0.13589
MSTRG.868	PGSC0003DMT400022526	1.52483	8.1771	5.9409	22.6199	2.3678	7.37272	5.35826	19.3686	1.36496	1.21135	6.08749	3.21322	4.43584	18.7795	0.472248	5.07518	28.5656	0.508025	2.42466	5.28326	0.455266	0.378374	3.50646	0.933179	1.21889	1.53849	4.15114	2.88183	2.5753	29.5141	1.48874	12.1147	1.20498	2.11841	2.18433	6.44159
MSTRG.874	PGSC0003DMT400022189	0.385821	0.086087	2.91927	15.8792	19.8953	13.1002	17.4293	11.1062	11.3993	2.57758	1.63652	0	12.3499	18.7065	12.797	11.3893	11.2729	11.208	0.819349	1.03592	0.933318	8.69723	7.07508	19.7864	8.39817	3.70533	12.0593	0.243884	0.237361	1.09603	21.3374	28.0326	20.0699	8.20882	15.3956	15.379
MSTRG.871	PGSC0003DMT400033985	0	0	0	0	19.6061	0	0	0	0	0	0	0	0	0	0	23.1246	0	0	0	0	0	0	0.095633	0	21.5872	0	0	0	0	0	0	0	0	22.2082	17.768	19.2116
MSTRG.871	PGSC0003DMT400033984	6.12485	2.52553	5.34803	6.15214	7.65959	30.2556	1.14822	3.42828	0.925959	3.19878	3.58032	3.1937	3.48361	1.87851	0.721415	13.6593	4.44793	1.15415	16.6438	1.51531	2.32219	2.53316	1.25586	4.47472	1.34684	8.44304	6.63684	1.25355	1.77479	0.90182	1.23543	0.873149	0.453275	9.52195	4.44526	0.922311
MSTRG.872	PGSC0003DMT400033993	14.6127	15.8323	23.1338	20.4222	16.0623	19.9604	16.8723	18.8973	17.068	27.2309	9.88162	15.2739	11.9036	15.9822	19.4304	18.0165	15.8695	19.7757	22.7854	20.6537	19.8813	20.4509	16.8829	15.5958	14.018	17.854	16.8195	14.2743	15.2707	16.2379	16.0464	18.3176	18.3054	16.9062	21.4481	17.5356
PGSC0003DMG400008609	PGSC0003DMT400022188	0.634663	1.24672	0.510401	0.214259	0	0	0	0	0.209246	0	0.210853	2.1594	0	0.350033	0	0.685714	0	0.178002	0.748992	0	0.62775	0.24376	0	0	0	0.248039	0	0	1.10345	0.463435	0	0	0.232602	0.224387	0	0.282006
MSTRG.878	PGSC0003DMT400022191	9.84288	9.60873	11.2447	4.22059	3.3987	4.48791	2.77911	2.09065	3.5795	6.75582	4.3021	10.285	5.77169	5.15555	5.02681	4.87982	4.97406	4.18873	16.1604	3.60247	4.8811	5.74383	6.23929	0.035527	3.88461	5.97139	5.44454	10.0104	14.4727	11.106	3.4658	3.80251	3.26593	3.82468	3.58227	3.59919
MSTRG.881	PGSC0003DMT400038769	38.3565	49.3603	68.6442	12.022	5.61913	7.82827	9.68761	8.38818	8.2392	53.4115	64.0549	51.1368	8.31018	10.6023	7.81175	15.4851	12.8337	19.4126	22.2598	61.9504	57.9405	10.3614	10.0998	7.14546	15.6182	15.5298	14.788	29.2029	30.3284	16.9296	11.1075	6.89184	6.96142	10.8066	8.85941	8.09713
MSTRG.889	PGSC0003DMT400031392	3.98078	9.88877	21.7614	20.7209	4.38216	2.85409	10.2721	5.74775	3.81638	12.1683	9.21131	0	15.398	5.20874	3.14358	2.73319	3.48363	6.05363	10.9596	5.51051	7.45221	6.57991	2.09982	2.4822	3.32266	7.56245	9.41237	3.14927	3.88913	0	5.64762	3.36918	1.58488	2.30354	3.1205	3.51573
MSTRG.894	PGSC0003DMT400080339	0.413442	0.514961	0.864809	0.745233	0.171571	0.486556	0.383668	0.50143	0.035337	2.69512	2.30353	0.275193	0.332221	0.731311	0.589121	0.435912	0.154472	0.91533	0.414861	1.54807	2.28162	0.697803	0.421593	0	0.695043	0.395709	0.063583	0.130672	0.129773	0.401567	0.21028	0.200565	0.371384	1.11412	0.467507	0.250603
MSTRG.896	PGSC0003DMT400046121	0.429137	1.12022	0.558005	0.327534	0	1.41793	0	1.28871	3.36341	5.33715	5.33371	0	0	0.201019	1.753	0	0	0	0	4.08949	4.28342	1.39441	0.728931	1.74027	1.23844	1.00058	2.14578	0.533613	0	2.56141	1.07302	0.850375	0	0	0.241571	0.890687
MSTRG.897	PGSC0003DMT400046119	1.12949	1.4031	7.25433	1.94235	0.957196	0.757986	0.934891	3.12486	2.00394	10.047	10.9864	1.38933	0.430482	0.891346	0.946015	1.98979	0.501997	0.436991	0.457408	6.3819	4.14199	0.932475	1.04921	1.46542	0.497593	0.448468	0.269736	1.67474	0.855271	0.09257	1.36935	1.66171	0.397295	1.8372	1.3256	1.88084
MSTRG.903	PGSC0003DMT400008894	0.835862	1.43497	1.43152	1.37553	0.870506	0.982155	1.52181	1.99596	0.779457	1.48829	0.958477	1.17556	0.657104	0.878438	1.19232	2.7305	2.96926	0.865154	0.652565	1.30512	0.526581	0.488853	0.995914	0.839027	1.04419	1.01673	1.45583	1.85054	1.07708	1.48868	1.2834	0.577088	1.07346	1.57016	0.668507	0.942906
MSTRG.901	PGSC0003DMT400028376	30.164	28.0633	26.8854	24.4967	24.8101	24.6512	12.4264	16.8169	17.1012	20.0859	18.0687	33.0218	20.1368	21.8471	17.9627	16.4893	11.9532	15.7712	31.0248	17.8635	18.9209	20.748	22.3558	24.2308	15.4278	20.2681	17.9439	34.5625	32.3079	19.2223	25.6945	23.6627	20.2716	15.0108	14.3944	20.472
MSTRG.904	PGSC0003DMT400003101	29.6238	31.3944	32.4596	35.1305	39.9645	29.3083	29.6413	21.7086	25.7336	25.4028	17.3709	30.6542	43.8931	44.6358	36.4864	39.4875	32.5991	37.6076	47.2204	20.495	29.5327	38.968	32.948	32.2266	34.389	29.4486	30.0668	33.5606	45.7595	40.7849	31.1524	38.573	35.7534	25.8825	30.0835	22.7777
PGSC0003DMG400001237	PGSC0003DMT400003108	0.960172	0.353303	0.593884	0	0.070269	0	0.463116	0	0.122728	0.108189	0	0	0.524472	0	0.28112	0.114004	0	0	0.391916	1.16541	1.13094	0.588062	0.428584	0.615815	0.086781	0.281983	0.545521	0.785865	0.751191	0.583036	0.486999	0	0.133803	0.441887	0.144715	0.867075
MSTRG.905	PGSC0003DMT400003105	17.1028	0	0	0	0	16.5173	3.25771	7.96496	0.583384	2.41351	17.2174	1.62052	4.30301	0	1.78293	15.0023	3.61456	8.26699	3.33296	0.391955	10.8217	11.3332	3.10759	1.866	0.512453	1.64171	4.50047	3.19895	18.4432	0	0.229623	2.89907	2.34129	1.40418	0.229276	18.3988
MSTRG.912	PGSC0003DMT400022600	1.91867	4.15981	1.58668	0.606631	0.467376	0.942925	0.666242	1.91746	3.96105	4.56937	4.60649	0.969455	0	0.72611	4.94696	1.29868	0.323223	1.06385	0.631889	3.55037	3.03498	1.23126	4.75678	2.17702	0.348433	1.70284	0.291358	2.21792	0.866864	0.449601	3.06693	1.08167	2.46517	1.66155	3.84493	3.39965
MSTRG.922	PGSC0003DMT400020072	0.001923	0	0	6.13508	0	1.85703	0	0	0.000754	0	0	9.22996	0	1.94498	0.002482	0	2.98358	0.027764	0.000735	0.000423	0.180519	3.10342	2.49621	0	0	2.83237	0	0	0.067982	0	3.08436	0.04055	0	0	0	0.001144
MSTRG.917	PGSC0003DMT400034053	3.94119	0	0.861484	0	1.35864	1.60873	2.0983	2.45967	0.036523	1.76201	3.77714	1.86992	2.08487	3.70337	0.870465	2.87312	0	1.71982	1.52476	3.76642	0.046607	0.040897	1.06545	0.163944	0.03236	0.048807	0.67455	0	0	0	0	1.22659	1.07532	19.107	0.050915	3.05919
MSTRG.926	PGSC0003DMT400041253	1.21505	1.87023	0.531215	1.88878	1.94774	2.13577	1.3463	1.92433	1.3323	1.16859	1.20698	1.72927	1.98324	1.02968	1.12597	1.85639	0.877483	1.41222	0.404443	2.17948	0.831168	0.433255	0.613247	2.27054	0.800381	1.33308	0.974963	0.956578	1.01526	0.381341	1.03002	2.00093	1.24917	0.486339	1.04733	1.63512
MSTRG.927	PGSC0003DMT400041251	0	3.39617	5.92982	4.31108	3.71403	3.77061	3.19412	2.9253	2.95991	3.56481	3.49629	9.76607	4.83101	2.8275	2.52552	5.47028	2.84541	4.76875	0	1.99203	0.976379	4.08866	0.852212	3.98134	3.71752	6.07247	4.88326	0	8.92445	0.462757	1.36611	4.27796	2.52562	3.1601	2.08577	2.21261
MSTRG.928	PGSC0003DMT400041244	41.4864	39.8501	50.9353	23.7577	20.9338	20.0169	15.3825	15.3055	22.8628	32.2437	23.6087	38.2503	24.0008	24.5422	25.24	23.3004	20.2841	23.6023	52.2944	35.2984	38.9914	33.1467	33.3827	30.8441	22.1381	23.4495	28.1978	42.0485	50.2033	50.5093	21.2444	23.3347	22.8862	24.8571	19.713	21.9286
MSTRG.929	PGSC0003DMT400041240	1.88271	5.42168	3.28139	4.08413	0.845663	3.90613	3.97231	4.1316	1.10935	2.15075	0.762769	5.18928	3.16711	0.20976	0.82568	3.31156	3.2742	4.67422	2.04134	1.03933	0.845796	2.46071	0.715474	1.31826	4.17378	2.6397	6.47353	4.23121	4.82156	0.843702	1.12874	1.37108	1.09621	1.05538	0.175948	1.1617
MSTRG.932	PGSC0003DMT400074738	0.515098	2.94016	2.46063	4.17083	6.03878	4.37855	1.94001	0.469988	1.82743	8.0093	2.20807	1.29109	5.15545	7.07691	4.07054	4.26548	0.695777	5.61156	2.55728	3.53816	6.7469	7.01138	2.87178	5.35056	5.60879	0.988983	5.39379	2.22322	1.94912	2.10236	5.39792	4.87655	2.93322	2.91109	2.77502	2.28146
MSTRG.930	PGSC0003DMT400074727	11.3088	12.4575	13.2926	16.257	15.9419	21.3033	25.6868	22.6357	14.6736	23.3406	14.2674	7.9275	4.45871	16.6093	12.3129	2.22709	13.0403	9.65986	11.0854	25.1358	16.5149	19.0876	16.7088	10.8297	13.0008	10.9476	10.1439	14.6178	5.32894	15.3818	12.7382	17.1185	16.0106	18.3327	16.6706	16.788
MSTRG.931	PGSC0003DMT400074731	2.21114	2.67611	3.57363	4.06716	1.24235	1.63451	1.36602	1.74235	2.02653	3.18364	3.60841	3.48274	1.61195	2.33983	1.56588	4.23688	3.37629	3.0361	4.21497	4.85987	2.47128	3.22066	2.29977	1.61423	4.29058	4.60287	3.09403	3.03328	1.55135	1.2625	2.97585	1.14549	1.77274	2.17328	1.50259	2.68319
MSTRG.934	PGSC0003DMT400074734	0.167063	0.427472	0	0.655804	0.242788	0	0.363892	0	0	0	0.083816	0.039627	0.550156	0.078215	0.287883	1.8907	0	0	0.216257	0	0	0.266534	0.053232	0.669862	0	1.23989	0.406371	0.053336	0.441227	0.944619	0.58995	0	0.356899	0.363421	0.327005	0.07919
MSTRG.936	PGSC0003DMT400074744	0	1.7048	0	0	2.42887	0	0	0.905843	0	0	0	0	0	0	0	0	0	0	0	0	0	0	0	0	0	0	0	0	5.91974	0	0.073449	1.73615	2.27893	0	0	0
MSTRG.938	PGSC0003DMT400008960	15.3345	29.6656	17.7219	10.5547	12.1965	10.5284	11.2645	8.35689	10.2612	13.0181	16.7636	21.4099	14.4856	13.1687	12.6465	15.8118	13.8707	19.9155	11.0429	12.9246	15.1795	18.1001	16.0497	12.0522	20.4645	8.6607	17.5027	20.0137	22.5354	40.3098	13.2862	12.4497	14.6516	29.7135	13.0659	10.9672
MSTRG.933	PGSC0003DMT400074732	0	0	15.7963	0	15.2564	10.1405	0	0	0	27.9545	39.508	0	0	4.4958	2.18341	6.8898	0	2.57915	0	40.6984	27.4968	0	6.38039	0	9.38583	7.04928	3.78088	3.97704	0	0.642113	0	4.29075	6.10654	36.1768	29.3287	7.71258
MSTRG.941	PGSC0003DMT400017249	0	0	11.3147	0	0	0	0	0.074397	0	10.1134	9.48643	0	0	0	0	0	0	0	0	10.1063	14.1825	0	0	0	0	0.024428	0	0	0	0	0.020433	0.058997	0	0	0.053653	0.027502
MSTRG.939	PGSC0003DMT400044062	47.2158	38.7262	45.164	51.7522	48.4816	54.5292	61.9976	52.166	65.7934	37.0131	31.4712	46.8402	62.0366	52.658	62.1	59.5288	51.2414	59.309	49.4849	30.5412	29.8685	65.265	65.6723	37.2564	50.4962	76.6202	41.4633	37.484	30.3913	33.0273	49.6633	44.9429	58.1496	40.7694	56.593	56.8009
MSTRG.893	PGSC0003DMT400003226	4153.82	3073.79	2854.24	1469.85	1378.68	1470.68	1162.43	1418.43	1617.29	2568.8	2839.9	3462.92	2060.84	1339.19	1789.23	2132.6	1679.85	2330.93	3793.7	2823.47	2833.72	2405.48	2088.95	1396.84	2201.91	2974.76	2526.64	3239.34	3466.51	3266.33	1351.71	1014.49	1626.47	2223.52	1162	1475.52
MSTRG.945	PGSC0003DMT400046528	0.415424	63.1097	13.981	0.065073	0	0.042233	3.81638	19.3898	8.12488	0.201714	15.8877	0.361337	0.036226	0.106451	0.094586	0.045509	0.035268	0.062175	10.6033	19.9055	20.8215	7.39445	9.40675	22.4921	0.049126	0.127351	16.1956	0.354483	39.7252	0	0.090299	5.51766	0.079677	13.3164	0.101381	0.108103
MSTRG.950	PGSC0003DMT400043586	0	0	0	0	0	0	0	0	0	0	0	0	0	0	0	0	0	1.44742	0	0	0	0	0	0	0.175383	0.440218	0	0	0	0	0.558401	2.08251	0	0.154468	0	0
PGSC0003DMG400017830	PGSC0003DMT400045959	0.733249	1.08804	0.380638	0.877225	0.725601	1.54752	0.556546	0.288799	0.847247	1.18415	0.507903	1.20992	0.578532	0.393555	0.620048	0.642914	0	0.337247	0.269099	1.06038	0.986151	0.35455	1.17524	1.01371	0.497507	0.872749	0.385862	0.475832	0.197344	0.273247	0.611913	0.543084	0.625971	0.375508	0.440889	0.820891
MSTRG.952	PGSC0003DMT400016769	18.9744	20.9956	15.0615	33.7033	25.5216	29.9043	33.1013	26.6467	23.9137	14.2408	14.8063	18.8084	28.3913	30.8123	39.4907	21.0082	21.7621	21.5782	21.2459	16.8746	23.5915	31.787	28.8957	31.8024	16.389	15.9505	13.9016	14.9915	21.1579	19.4682	33.9864	31.9977	38.6081	17.4157	27.4014	22.7328
MSTRG.951	PGSC0003DMT400054327	236.489	226.194	264.458	303.805	258.585	272.531	330.09	223.154	323.526	227.862	209.747	254.165	303.877	329.631	286.227	310.043	306.573	365.602	276.117	202.479	235.369	317.692	317.107	287.886	296.41	332.167	321.909	170.643	281.161	289.369	297.52	266.741	298.499	252.372	277.694	256.355
MSTRG.953	PGSC0003DMT400016765	14.77	13.4849	27.125	20.6106	20.3453	21.0243	16.2453	19.4559	20.6572	28.6886	28.2876	14.7509	14.3058	17.0136	15.5303	15.9644	13.8939	14.435	14.4015	25.9708	26.1066	17.1026	20.0246	17.2153	14.8033	17.3797	13.2419	16.9477	14.3118	11.0252	19.461	21.0009	16.9152	18.6792	20.0736	20.1123
MSTRG.955	PGSC0003DMT400016766	18.2108	16.8318	18.2767	13.6013	11.7278	2.12685	14.6322	10.7203	11.742	16.4518	16.3109	16.6743	11.6731	11.8369	10.6059	16.152	13.4294	14.8033	13.2814	14.1984	18.703	12.8152	14.3219	9.00979	13.9559	17.1194	10.8935	12.9723	14.5158	14.3542	13.9466	12.9821	13.9472	12.479	12.0122	9.83121
MSTRG.958	PGSC0003DMT400016776	6.38606	9.71723	7.00852	1.57076	1.5445	2.47193	4.37552	3.82844	2.34273	11.362	9.04699	7.05819	3.66811	1.86465	2.33408	2.8536	3.19533	2.14044	2.64807	13.2532	10.7341	0.857459	2.33533	1.8766	2.18684	3.3244	1.33104	4.5952	4.2171	5.7514	1.85089	2.38517	2.71155	3.7512	4.23905	4.4505
MSTRG.957	PGSC0003DMT400016778	4.4477	0	18.7749	0	8.48745	6.88641	12.5188	15.8471	0	0.155832	29.619	0	5.83812	4.39901	7.9648	6.88698	5.47634	4.93226	5.50306	43.0908	34.6183	5.26005	5.42271	5.7918	6.69663	12.6885	5.85111	7.60086	0	0	7.95797	0	0	0	11.4171	0
MSTRG.956	PGSC0003DMT400016775	4.9716	13.0923	24.0163	2.74718	36.3496	42.9222	0	3.47061	39.3708	0	3.76482	0	24.458	35.7284	39.4563	39.5074	28.3615	6.80238	2.80011	0	1.99963	38.288	22.7781	36.6731	31.5685	32.2026	2.55193	16.8686	24.4464	0	22.6852	13.1339	33.124	29.4033	4.39884	35.2041
PGSC0003DMG400007724	PGSC0003DMT400019954	0.692113	0.417866	0.133139	0.310499	0.130112	1.07143	0	0	0.173913	0.979824	0	0.112865	0.640946	0.256631	0.513941	0.426495	0.089983	0.065815	0	1.18963	0.713033	0.737374	0.344656	0	0.439911	0.08836	0.453518	0.282914	0.709657	0.178636	0.35216	0.31886	0.33708	0	0	0
MSTRG.967	PGSC0003DMT400085929	2.87841	2.55087	5.79942	7.33864	8.1073	6.557	9.23981	7.23461	9.801	3.69569	2.34239	2.35767	7.90983	8.11132	7.56524	6.80779	7.33418	8.90306	4.83013	5.08381	4.56153	7.45573	6.73021	8.65535	5.33782	7.09826	5.31719	4.61245	4.07824	4.14597	6.32541	10.0387	8.55593	5.40907	8.66196	8.44302
MSTRG.968	PGSC0003DMT400068847	16.2702	10.3598	10.4264	13.3711	11.1	15.0277	10.4136	9.50775	13.6349	10.1102	8.66058	14.0472	12.3567	12.6355	12.4979	16.2232	11.5964	13.9551	13.4349	9.12681	7.43983	14.4759	14.4977	15.8484	12.8974	23.1158	12.5898	11.535	12.3275	9.40943	15.4904	12.3901	12.5977	9.81689	11.3007	12.5391
MSTRG.969	PGSC0003DMT400068851	3.81715	2.59674	13.4122	1.36185	0.927169	1.57642	0.658541	0.517258	0.767222	3.99754	3.08953	2.19622	1.28212	2.91575	1.25509	1.83496	1.87299	1.45696	14.1694	3.42109	3.45076	1.86697	0.631734	1.04319	4.10325	3.6735	3.87007	12.1758	10.2315	7.93364	0.848941	0.425677	0.980901	2.70747	0.858414	1.61471
MSTRG.970	PGSC0003DMT400068857	5.6145	1.62334	2.71522	2.49464	4.45451	4.94371	4.0221	1.52457	6.29543	0.280987	0	10.0112	1.9881	7.74238	3.74967	3.37641	2.44906	6.2429	0	0	2.44375	5.30022	6.73434	3.13132	5.02011	9.98666	6.19566	3.98002	3.50007	1.10281	4.93061	4.45262	7.60142	2.06136	1.79042	6.20552
MSTRG.974	PGSC0003DMT400019937	3.31503	4.04681	17.3027	2.18354	2.49422	2.3218	2.59321	4.22852	2.31353	18.5299	22.3445	7.37183	1.26584	1.89138	1.47731	2.33447	1.16282	0.717428	1.56499	24.8603	17.3383	1.99465	1.51844	1.59276	2.03076	2.46489	1.8325	3.21749	2.94054	2.34723	2.72298	1.9045	1.84759	2.39506	2.58196	2.85516
MSTRG.972	PGSC0003DMT400019931	2.13848	14.4211	0	11.7808	18.2054	13.0733	10.0804	38.6245	18.1598	18.2458	21.5218	22.0228	1.41607	7.24673	10.7214	6.14802	5.46816	9.30955	4.55907	14.1477	16.6468	4.89332	14.1943	6.8158	8.54478	38.3011	5.68802	18.327	9.04054	16.9203	7.55104	10.1367	7.92459	36.0797	18.3643	40.1756
MSTRG.981	PGSC0003DMT400003061	4.22041	5.27246	2.50103	3.72559	2.94539	3.80143	4.83427	3.76352	4.11972	2.75783	3.1587	3.02964	2.54957	5.30358	5.41864	6.01756	4.28126	3.90425	4.10185	2.64623	3.06617	6.13895	4.16542	3.90471	5.30943	3.25467	5.41909	3.02042	4.37979	2.30967	4.87651	4.82432	3.0556	4.8246	5.66316	3.23323
MSTRG.979	PGSC0003DMT400003063	0	0.070449	0	0.162541	0.785837	0.382229	0.096622	0.176668	0.2158	0.38047	0.212209	0	0.076084	0.643648	0.489748	0.972237	1.58082	0.406245	0.376216	0.316318	0.528691	0.247269	0.256818	1.10601	0.511748	0.302159	0.474817	1.04061	0.132087	0.264722	0.498845	1.21486	0.783074	0.402129	0.936423	0.317565
MSTRG.978	PGSC0003DMT400003049	5.79685	5.59774	45.7363	37.904	34.4395	39.9604	67.9961	24.4166	26.9554	79.0582	27.6413	4.197	8.14151	21.4955	22.3471	22.6564	20.1201	23.9133	2.60264	34.9643	88.0451	19.4456	22.1563	38.5934	20.1114	2.27271	29.4703	4.44672	3.34386	5.31896	29.9988	27.4591	28.4399	21.3732	25.7421	13.8756
MSTRG.987	PGSC0003DMT400003054	3.2794	8.44609	4.69339	5.25703	10.5988	4.9377	2.0541	2.86461	1.85454	4.57137	3.18385	4.95504	16.0123	10.9826	5.12343	11.0166	6.80022	8.71819	3.2316	3.97549	3.91812	12.552	7.23904	5.73522	14.3997	2.41546	7.99364	3.57055	5.28868	3.59509	7.37143	7.48015	3.85221	10.3111	7.72255	2.35471
PGSC0003DMG400006717	PGSC0003DMT400017215	0.567813	0.778796	0	0.057314	0	0.307654	0.100083	0.750392	0.106725	0.465373	1.10552	0	0.053656	0.552671	0.37881	0.31809	0.130167	0.088154	0.445505	0.390913	0.471321	0.017189	0.028657	0	0.216544	0.341745	0.054694	0.358924	0.034932	0.786909	0.078616	0	0.174637	0.27174	0.336484	0.168645
MSTRG.971	PGSC0003DMT400019928	131.079	30.3087	28.6164	15.3121	63.7994	24.7851	10.6464	72.6478	72.7436	20.8627	7.01702	121.804	82.6498	54.2071	26.5041	80.3206	56.6238	69.6743	130.416	57.2563	33.0459	24.299	78.6138	22.9467	18.2621	40.9724	75.0258	42.8189	76.3214	44.629	63.1853	43.7662	85.1623	16.0496	14.6582	82.2331
MSTRG.988	PGSC0003DMT400025463	0	0	0	0	0	0	0	0	0	0	0	0	7.45203	0	0	0	15.6122	0	0	0	0	9.9542	0	0	0	7.98365	0	0	0	0	0	0	0.752411	0	14.9591	0
MSTRG.995	PGSC0003DMT400038780	0.335205	2.77134	0	0	0	0.537547	0	0	1.0453	0	0.517401	2.75658	0.980845	0	0.812781	0.896858	0	0	2.90336	0	0	0	1.40763	0	2.08535	0	0.330138	1.9653	0	0.66675	0.176114	0	0.563985	3.68465	0	0
MSTRG.998	PGSC0003DMT400038778	0.259097	0.419944	0.983425	0.658395	0.263974	1.46331	2.02384	1.88099	1.46564	0.381396	1.40958	1.57759	2.13523	0.451951	0.709877	0.565959	2.72545	2.42316	0.196983	0.165585	0.173732	1.13212	0.440202	0.130397	1.21769	0.357501	3.24106	1.63875	0.897083	0.29717	1.31865	0.184573	1.09828	1.56373	1.44881	0.761186
MSTRG.1000	PGSC0003DMT400019535	2.51094	2.34687	4.1808	2.78329	1.98662	3.07801	0.452943	8.32862	8.43501	0.88992	2.41934	2.6108	1.71472	1.37567	2.42472	15.6493	5.32969	5.97802	10.8661	3.97411	4.57623	1.24485	2.37639	1.594	5.06654	0	5.39008	0	0	3.21649	2.72466	2.42639	4.26114	6.27797	3.55271	7.26651
MSTRG.1002	PGSC0003DMT400019530	0	0	0	0	0	0	0	0	0	10.4009	0	0	0	0	0	0	0.812899	0	0	0	0	0.528304	0.047366	0	0	0	0	0	1.52983	0	0	0	0	0	0	0
MSTRG.1001	PGSC0003DMT400019534	0	0	0	0	2.50309	1.34606	0	0	0	0	0	4.49621	0	0	0.821275	0	0	1.51866	0	4.00451	1.27969	0.987558	0	0	1.62871	0.552621	1.71824	2.84952	4.17015	0	0	0	0	1.22745	0	2.55077
MSTRG.1001	PGSC0003DMT400019533	3.40941	2.58225	2.02229	3.25257	2.15944	2.32227	1.68054	2.97871	3.86267	2.37613	2.69741	3.96038	1.863	2.54282	0.552121	3.25165	2.1596	0.842343	2.35611	1.83104	0.507478	0.45747	3.17457	2.1298	3.45693	1.23388	1.09304	3.11184	1.50108	0.568711	3.05451	2.18261	2.04405	1.72557	2.56046	1.1872
MSTRG.999	PGSC0003DMT400019542	15.0762	10.6211	27.0991	21.1096	18.8708	20.5305	20.9837	22.573	22.4637	41.2618	33.4961	14.2533	15.1273	16.9558	15.4368	16.3615	13.4607	13.1678	11.6655	28.7211	27.6617	15.1545	18.1072	16.0101	17.3925	18.8436	12.7746	13.6091	12.9332	8.46181	23.7885	23.6869	18.7324	18.0324	20.5451	24.1168
PGSC0003DMG400026694	PGSC0003DMT400068655	1.25687	0.09681	0	0	0.212242	0.685109	0	0.353127	0.538238	0	0.823555	0.866047	0	0	0.051889	0.550941	0.176135	0.448322	0.458346	0.609362	0.331247	0.276687	0	0	0	0.233497	0	0	0	0.06548	0.229779	0	0.323311	0.426163	0.645157	0.329485
MSTRG.1005	PGSC0003DMT400019544	22.9494	22.8838	20.2475	53.7165	50.0007	43.9562	51.3463	43.46	47.2992	8.17607	7.35204	26.9419	48.0926	60.6017	34.7712	48.2424	36.2805	38.996	35.5395	8.81679	11.0989	44.9022	38.0732	38.5253	38.3444	37.5502	34.5603	28.5821	37.0018	30.332	50.7688	61.3904	44.2512	32.3424	51.6708	37.0993
MSTRG.994	PGSC0003DMT400038785	103.758	85.1643	167.692	145.428	22.8519	208.425	189.791	184.071	120.558	169.683	147.083	168.117	183.627	14.2961	129.169	173.724	128.072	203.624	81.7707	161.136	65.7913	171.063	69.8656	12.1592	99.4445	125.367	113.099	100.064	85.9639	120.603	152.176	188.825	202.355	128.703	201.421	246.168
MSTRG.1008	PGSC0003DMT400068658	22.0421	14.8128	25.1404	31.5195	57.0961	28.3114	40.4619	26.8082	46.4686	29.6176	22.9694	32.9482	55.605	27.3924	27.0363	39.8722	18.2531	24.8202	19.3465	24.2779	18.7808	26.7806	33.4198	28.4391	14.9441	33.9168	29.4585	12.611	15.6315	17.8906	31.4323	21.5297	26.1098	32.97	16.8021	29.3521
MSTRG.1020	PGSC0003DMT400090689	2.81588	1.4116	1.70501	227.539	217.862	352.3	583.573	821.409	654.9	0.836082	2.7472	3.24612	332.836	259.423	745.997	272.271	177.112	223.219	7.51807	1.87401	1.71459	250.355	650.01	291.25	209.646	608.458	138.228	1.2892	1.6646	2.3403	251.146	274.448	432.188	285.211	506.337	605.864
MSTRG.1022	PGSC0003DMT400056221	5.59762	3.61035	4.07239	4.52871	3.99315	4.8547	5.2111	3.11973	4.44039	4.87888	4.16434	4.30326	4.4604	1.71041	0.344704	2.22074	2.3514	0.325997	0.294657	3.68061	4.96	4.37131	3.3871	0.395152	2.18437	3.84845	3.75627	2.64969	2.58372	2.52378	5.29941	7.10849	3.47098	3.38912	3.48828	4.90494
MSTRG.1021	PGSC0003DMT400056226	197.39	190.465	128.68	187.373	153.611	210.202	339.684	273.466	370.822	113.074	141.722	182.031	247.623	205.357	255.029	253.09	251.757	296.067	188.788	116.653	146.022	302.189	333.027	181.237	255.363	316.655	229.434	153.663	160.34	228.192	202.541	200.371	259.173	285.609	321.504	237.024
PGSC0003DMG400044334	PGSC0003DMT400094763	0.654219	0.738455	0	0.455657	1.20856	0	0.588831	0	0.085484	0	0	0.320062	0	0.498503	0.170287	0	0	0	0.249805	0.342303	0.093093	0	0.165095	0.156441	0.124748	0.191761	0.482271	0.033084	0	0	0.597824	0	0.415806	0.216318	0.294642	0.186536
MSTRG.1034	PGSC0003DMT400061711	0	0	0	0	4.56003	0	0	0	5.04977	0	0	0	0	0	0	16.8506	0	0	0	0	2.07955	5.17365	0	0	10.4296	3.34738	0	0	0	0	1.9728	0	0	0	0	10.7344
MSTRG.1024	PGSC0003DMT400056218	0	0	2.83801	4.79194	0	5.30459	1.49619	0	4.69802	3.74063	5.20771	3.27162	1.05524	0.852664	1.32589	1.6947	3.91026	0.04873	0.105321	0	2.44657	0.425601	2.32635	0	0.308069	2.50882	0.646808	0.688577	2.23701	1.74354	1.81072	1.91188	1.74661	2.56994	1.8499	0.983044
MSTRG.1024	PGSC0003DMT400056206	33.8158	6.06572	5.79711	3.26264	9.9987	0.149006	10.1113	0	0.077428	9.75232	13.5795	10.083	11.5785	4.11386	7.10881	19.8811	3.03006	4.16057	2.6174	4.61046	0.268591	12.258	3.00974	3.64189	0	0.073347	1.08513	0	0	8.8746	4.51651	0	4.91888	0	2.35064	4.39074
MSTRG.1035	PGSC0003DMT400061712	12.6171	15.7615	9.52447	12.8877	11.3298	11.7801	9.12818	8.6168	9.66513	6.69323	6.87026	11.213	10.0869	10.2832	8.32847	10.8978	6.4433	9.0012	9.81931	7.17079	4.53581	9.41833	9.17516	9.28753	11.2412	8.06505	9.00043	11.3634	11.3624	5.46344	13.9433	11.2644	8.4748	8.71015	7.75986	7.21049
PGSC0003DMG400024028	PGSC0003DMT400061735	1.36671	0.090964	0.666601	1.11932	0.319078	0.321868	0	0	0	0.47407	0.550762	0.268538	0.256728	0.308377	0.292533	0.253658	1.4277	0.161397	1.42831	0.188947	0.157791	0.09122	0.069958	0.783565	0.154355	0.108344	0	0.86567	0.501418	0.273446	0.071967	0	0.101262	0	0.326919	0.082337
MSTRG.1041	PGSC0003DMT400003039	64.5851	58.222	68.9103	81.485	78.9491	80.2979	108.171	90.1051	92.2248	65.1416	85.4724	67.4997	77.4305	70.4931	86.971	74.8614	87.05	87.3355	51.2295	79.3691	73.0383	73.9946	92.6713	80.8461	72.939	106.624	68.8358	48.482	47.3001	67.5884	79.5525	80.1771	114.546	74.1949	97.0701	87.4491
MSTRG.1043	PGSC0003DMT400003037	8.59435	32.4839	28.0606	70.8988	89.942	129.505	87.5098	149.575	122.668	52.3042	53.4483	12.4296	50.3323	79.4465	145.766	59.8159	18.7911	25.2092	1.24483	68.8362	61.7066	87.3117	104.1	155.459	37.2031	126.713	14.3549	17.0864	16.8963	19.2705	123.983	102.178	82.2707	79.0212	144.583	202.206
MSTRG.1044	PGSC0003DMT400003036	10.9627	10.2053	7.13105	5.62737	4.0166	5.05585	2.35703	4.23268	3.31791	7.48388	6.75248	9.43412	4.47845	4.22063	4.36802	4.846	5.0637	6.08904	10.0427	7.60673	6.02678	4.61034	4.39131	3.91682	6.24179	4.61046	4.5745	11.2513	7.36399	9.18441	3.49769	3.91526	4.50369	4.24842	2.8005	3.06601
MSTRG.1045	PGSC0003DMT400056531	3.91187	1.89337	2.48095	1.96732	2.06407	2.61933	2.46633	1.92087	2.32707	2.2875	2.22254	2.27932	2.39554	2.36208	1.53947	2.35653	1.75037	2.81614	1.74291	1.45555	1.89437	1.84625	1.82613	1.30844	3.20209	2.90797	1.97825	2.23439	1.51445	1.17054	2.4107	1.30363	1.74202	1.73961	1.78309	2.20353
MSTRG.1050	PGSC0003DMT400029823	4.68228	5.75056	9.95706	9.24566	11.1554	11.5144	11.8419	11.5833	8.98843	7.72229	5.39268	6.34092	9.29533	10.7813	11.8811	7.68975	7.25443	9.89056	5.79415	5.71278	6.74795	8.84915	12.9707	11.598	12.5142	10.3413	8.22133	6.81749	6.56255	6.58215	10.8639	11.4576	10.881	9.74718	10.1232	7.71136
MSTRG.1051	PGSC0003DMT400029834	3.6147	1.79834	4.72829	4.32497	1.68126	3.2	3.08206	2.03102	2.37141	5.24313	5.06781	4.35236	3.17637	1.79415	3.04461	3.39614	4.69759	4.44567	5.68667	5.16118	3.62334	5.02777	4.07349	2.10983	2.99298	2.62589	3.59903	3.4878	3.90022	4.0282	3.0191	3.76088	2.22759	2.24614	1.24835	2.3568
MSTRG.1042	PGSC0003DMT400003038	82.2244	83.0325	53.6219	59.4784	53.5065	50.3633	53.5819	39.1267	58.4612	41.5728	52.4965	87.5343	0.348929	51.8125	52.6299	61.4352	47.6729	67.6031	71.2905	47.1776	41.3103	58.0544	58.8501	54.774	56.1638	62.2907	62.8689	74.3506	52.3265	46.7744	57.9535	49.1045	51.19	47.7679	42.5265	49.4516
MSTRG.1052	PGSC0003DMT400029809	35.0093	1.16106	25.335	21.1066	19.1509	20.4686	4.20502	6.52867	17.9751	20.2216	3.88675	37.5406	18.2122	17.9905	17.3062	24.208	18.1752	10.0248	15.4682	27.0041	1.30565	2.40174	2.14933	8.02277	23.4327	32.3506	22.9131	32.4223	28.8955	33.9774	21.5585	4.41287	24.6707	4.4935	11.3098	4.95175
MSTRG.1054	PGSC0003DMT400094533	0	0	0	0.607541	0.699825	0	0	0	0.287048	0	0	0	0	0.170797	0	0	0	0	0.064249	0	0	0	0	0.287852	0.23422	0	0	2.10417	0	0	0	0	0.332021	0.267202	0	0
MSTRG.1058	PGSC0003DMT400048849	2.54303	1.44026	3.2519	2.20525	2.29929	1.1463	2.68182	2.86604	2.00226	0.643703	1.17948	0.223425	2.96285	2.85341	1.25425	1.9652	2.34969	0.229767	0.183648	0	0.59952	0.078177	0.179866	0.386328	0.842065	0.220783	1.13647	0.310375	0.287458	0.023435	0.205591	0.392027	0.098354	0.254967	0.699266	0.03293
MSTRG.1059	PGSC0003DMT400087656	0.638994	0.506771	0	0.90869	0.153206	2.13608	0.376959	2.19113	3.56051	2.85026	0	0.66819	0.426571	0	2.11893	0.064841	0.500158	0.421169	0.115205	0	0	0	0	0	0	0	0	0	0	0	0	0	0	0	0	0
MSTRG.1055	PGSC0003DMT400029815	0.677116	0.222181	0.390762	0.425469	0.48612	0.457285	0.944315	1.12559	0.594659	0.287505	0.245506	0.659214	1.18853	0.703295	0.680574	0.395128	1.00788	1.11605	0.265633	0.285525	0.117067	0.548776	0.694321	1.53258	0.516456	0.884527	0.981229	0.214008	0.303054	0.333946	0.564255	0.788176	0.523727	1.42471	1.68854	3.16628
MSTRG.1069	PGSC0003DMT400072076	0.605347	0.958346	0.682782	0.277172	0.359148	0.227034	0	0.212669	0	0.237769	0.582731	1.67922	0.849209	0.489414	0.307318	0.827401	0	0.35243	0.796489	0	1.07629	0.197137	0	0.274588	0.335578	0.441457	0	0.986213	0.360899	1.14188	0.32402	0.305865	0	0	0.436389	0.185353
MSTRG.1070	PGSC0003DMT400081474	5.64673	6.76992	0.79692	1.94151	1.16807	1.19553	0.789197	0	1.05943	0.225976	0	2.44865	1.69206	2.08195	0.843963	2.46805	1.89368	1.91403	3.01337	0.77549	0.163964	1.42786	1.26907	1.38618	2.19016	1.26829	2.41426	4.40569	2.03075	2.69908	1.13175	1.11131	0.749156	0.662867	0.264908	0.389001
MSTRG.1071	PGSC0003DMT400081478	520.681	472.212	417.795	184.204	116.002	183.268	141.551	147.386	184.998	219.881	244.901	604.742	215.552	184.237	176.953	305.768	311.701	360.346	599.359	129.575	248.18	131.711	237.162	90.2452	140	486.119	327.67	478.597	347.573	503.074	133.247	81.5564	195.439	169.054	93.2737	166.424
MSTRG.1074	PGSC0003DMT400051304	3.6333	2.03455	4.93527	3.61839	1.43303	2.6589	2.5703	3.845	1.67932	7.58967	4.58894	3.86205	1.56062	3.17206	3.37893	2.88518	1.30581	3.74503	0.981904	1.29616	1.80274	4.33597	2.70896	0.884619	3.19111	4.76837	0.919846	2.75949	1.67982	0.271501	3.62613	1.70249	1.78763	4.12284	2.24769	2.73595
MSTRG.1077	PGSC0003DMT400051307	9.49617	9.85194	10.1527	7.13066	3.86819	4.77827	5.49081	3.59351	5.02419	9.72073	12.8764	5.96159	7.80334	4.53505	4.83325	7.94834	7.96892	11.9874	3.54795	3.7293	3.75047	5.3992	3.88107	2.32392	6.32636	6.43426	5.0223	4.46093	2.50669	2.17269	3.05177	4.73528	3.32713	6.20646	3.51257	3.64032
MSTRG.1072	PGSC0003DMT400081472	0	270.335	437.837	629.087	623.349	655.54	809.826	817.166	727.43	529.565	0	0	0	648.147	627.992	515.798	0	551.408	392.075	65.8438	0	478.239	471.091	559.727	512.644	553.416	532.496	0	317.493	0	646.969	601.676	556.326	482.56	803.037	671.281
MSTRG.1081	PGSC0003DMT400092144	1.55983	0.439962	0.268675	0.4331	0.380672	0.172973	0	0.18574	0.561536	0	0.221986	0.437313	0	0.248586	0.465338	0.826248	0.35576	0.260208	0	0	0	0	0	0.106876	0.085223	0	0	0.565038	0.274964	0.648054	0.34808	0.109526	0	0.19445	0.264856	0.132745
MSTRG.1083	PGSC0003DMT400028491	2.74256	2.51694	1.70042	2.72165	1.58732	1.89274	1.63237	1.55364	2.29062	2.28828	1.44105	2.69082	1.62515	2.37722	1.36764	3.04508	2.04559	1.93273	2.44935	1.27005	1.18769	1.54416	1.82599	1.28324	3.19881	3.06035	3.39407	2.56892	1.9947	1.25705	2.0461	1.49295	1.90423	2.45003	1.78669	2.61961
MSTRG.1084	PGSC0003DMT400089578	4.76588	2.31069	2.5842	2.10792	1.42008	1.87555	0.409094	0.989787	1.95868	2.82483	2.66044	4.28433	1.84116	1.0316	1.6412	1.98337	2.18359	1.89735	2.22647	1.70149	1.59115	1.4303	2.81223	1.80032	1.72893	3.78683	0	2.35287	4.28173	3.22567	1.77168	0.999125	1.73622	2.71442	1.47826	1.81824
MSTRG.1086	PGSC0003DMT400013590	0.410966	0	0.304303	0	0.233191	1.1692	0	1.40536	1.31265	0.998768	0	0	0	0.358103	0.49011	0.382855	0	0.576509	0.153545	0.766159	0.509468	0.277613	0.735511	0	0.230671	0.932325	0.446255	0.556916	0	0.208474	0.68009	0.457831	0.782268	1.04687	1.0561	1.92274
MSTRG.1088	PGSC0003DMT400013583	14.5611	11.8402	0	0	7.63484	0	14.843	16.0146	16.3916	0	13.2009	13.9255	13.5607	9.46833	13.0055	14.2934	11.0647	15.1786	10.0698	0	10.5985	13.4949	8.22502	11.5094	13.7048	15.5848	0	11.2561	8.02461	0	14.586	12.0964	13.3547	6.80025	14.4266	7.58349
MSTRG.1090	PGSC0003DMT400013577	2.83777	1.4799	2.87399	2.17539	1.45412	2.41564	1.37288	1.50175	1.41489	2.68933	2.9019	1.25829	0.957721	2.01624	1.72917	1.69512	3.88757	1.468	1.28054	1.54947	1.7937	1.54104	1.79207	1.05549	2.87852	1.63776	2.88943	2.55153	2.91541	0.281808	2.46846	0.907314	1.04678	2.04985	0.585017	0.757311
MSTRG.1091	PGSC0003DMT400013592	2.55822	3.30419	4.85051	6.79472	3.63542	5.78137	3.89933	4.21284	3.70358	4.55786	2.19254	2.56705	7.49555	6.52371	4.36671	6.72338	7.65237	9.6702	4.52958	4.32859	4.70904	5.48902	5.6434	3.65336	6.06694	6.73083	6.21498	3.48418	4.95365	5.63754	4.07706	4.43641	6.23451	6.41242	5.1772	4.47242
MSTRG.1092	PGSC0003DMT400013567	6.11818	6.16889	8.10675	3.8301	2.11993	3.96213	2.69105	5.31646	2.28359	4.27892	3.59577	5.30438	4.35022	3.63342	2.05067	5.76936	5.49822	5.17189	10.5577	6.28098	6.88438	3.83115	2.56417	4.41011	0	4.83214	5.3494	13.1312	5.06957	11.2568	2.2553	1.35041	3.67577	3.34982	2.36211	4.99465
MSTRG.1096	PGSC0003DMT400006325	0.046347	0	0	0.223617	0.284856	0.035874	0.202776	0.166925	0.124223	0.142904	0	0.060462	0.233578	0.387347	0.144707	0.144241	1.62356	0.268745	0.223026	0.042542	0.256058	0.154028	0.077971	0.191212	0.105695	0.089116	0	0.881032	0.245399	0.418138	0.2594	0.067842	0.118503	0.075009	0.230518	0.268696
MSTRG.1094	PGSC0003DMT400096732	0.518879	0.158847	0.668998	0.700687	0.915713	1.05786	0.687111	0.299463	0.790342	0.465706	0.718568	0.81123	0.523847	0.468831	0.584724	0.324708	1.78047	0.47203	0.46143	1.21533	0.436684	0.571644	0.589512	0.180961	0.98133	0.489392	0	3.61877	0.383407	0.267724	0.67555	0.116247	0.382944	0.335192	0.905146	0.860646
MSTRG.1089	PGSC0003DMT400013570	19.7091	1.32219	0.500713	0.367974	2.52769	3.2771	0.350761	3.43835	2.14863	2.90041	23.842	0	1.43749	2.47634	0.070549	3.41942	2.76931	1.68099	1.18161	0.039178	0.047978	1.29264	2.44075	2.68115	9.04252	0.04896	2.55855	2.32167	6.85711	0.053808	0.428584	22.6429	0.450295	0.161784	2.35455	0.927469
MSTRG.1097	PGSC0003DMT400066025	10.6932	7.61569	34.2432	25.3618	18.0477	15.5604	2.20759	22.0296	17.7335	47.2937	41.238	13.5087	14.4009	17.3821	16.9222	18.6614	21.6325	13.8503	12.1058	40.0962	37.5609	11.2117	2.29288	13.7255	12.8625	14.9603	16.0731	11.896	7.72569	6.56727	2.76296	24.0275	18.8291	18.4984	19.1124	21.6736
MSTRG.1102	PGSC0003DMT400008977	2.30001	0.606309	0.292313	1.178	1.79097	0.72265	1.16177	0.274831	0.975054	0	0.951568	0.447235	0.229752	1.2539	0.632843	0	1.92366	1.63819	2.81052	0.351505	0.348733	1.38724	0.986584	1.18371	1.20908	0.155832	0.998901	5.37902	1.03806	0.751428	1.25729	0.831744	0.953808	1.72206	2.50407	2.13457
MSTRG.1100	PGSC0003DMT400085260	8.26794	7.51627	6.35356	8.30482	8.05907	8.32882	8.53869	6.83629	1.99939	4.05182	5.66192	6.35517	5.92174	14.1015	6.53886	13.9967	93.4201	5.04277	11.3449	10.3771	12.1459	1.41241	2.2332	18.8877	6.03028	6.36373	13.9668	38.3867	8.88611	2.64479	6.08197	4.30502	4.59952	2.65324	10.3955	7.99395
MSTRG.1106	PGSC0003DMT400088629	9.92989	15.5489	19.6943	9.58834	9.02485	9.30603	8.13687	8.24769	8.29416	6.51769	9.12226	12.5646	9.88976	14.5076	9.49277	19.3929	22.1261	18.6462	20.5929	5.85293	13.7586	9.87175	6.69569	9.88893	8.67433	11.8516	12.4306	8.76424	12.2804	13.0396	6.64592	5.98304	9.84856	12.2853	9.70986	9.79542
MSTRG.1110	PGSC0003DMT400010739	2.2833	5.13254	0.631074	1.78024	0	1.53425	0	0	0.764996	1.96633	2.83647	1.79756	2.46518	1.55897	0.434573	1.47024	1.44562	1.84903	1.47436	0	0.522837	0.319397	2.54058	0.971205	0.680601	1.42777	2.05089	2.07704	4.95039	1.66455	0	0.751195	0	0.882625	0	0.926035
MSTRG.1107	PGSC0003DMT400086496	0.713428	0.403972	0.144689	0.064176	0.304254	0.62418	0.347917	0.069359	0.354434	0.707257	0.486632	0.026127	0.408937	0.807086	0.390398	0.899612	0.743088	0.400621	0.374957	0.768626	1.95617	0	0.188588	0.38745	0.356804	0.503005	0.333748	1.14887	0.369887	0.277572	0.306692	0.241894	0.154372	0.401066	0.070491	0.06949
MSTRG.1114	PGSC0003DMT400010738	16.664	27.3604	56.4219	17.2337	48.8152	28.7339	13.5973	26.0945	41.4332	99.5539	81.4885	15.8307	28.7443	36.6671	38.9602	27.0067	14.0262	41.8166	17.2673	41.2593	79.4568	50.9416	48.1926	46.7452	36.866	20.3402	24.8308	21.2225	19.7307	7.29571	41.7811	45.1434	37.3683	44.5559	41.4425	33.5842
MSTRG.1115	PGSC0003DMT400010750	24.4613	23.0479	27.0166	0	10.177	12.5846	0	0	0	0	21.3301	28.1426	11.9766	12.1908	12.2651	15.1397	11.7355	0	20.4653	21.5799	21.2449	0	14.5572	10.1776	13.3417	0.004234	0	18.3484	0	0	0	0	0	9.91435	12.3193	0
PGSC0003DMG400026830	PGSC0003DMT400068978	0.529686	0.23174	0.212278	0.356445	0.268759	0.911554	0.165537	0	0.088733	0.703989	0.325056	0.230345	0.166846	0.19444	0.14429	0	0	0.493409	0.55166	0.870333	0.146223	0.464785	0.133669	0.197593	0.307719	0.276016	0.718468	1.36906	0.217246	0	0.950941	0.216339	0.213689	0.230449	0.664923	0.723676
MSTRG.1118	PGSC0003DMT400068981	11.9618	15.9359	30.6886	19.6936	21.1636	18.5745	17.8872	17.9495	17.0617	48.9435	43.0724	12.4061	14.4208	17.0558	17.6175	19.3856	16.9465	16.8109	12.0485	41.5614	43.869	19.2449	19.2444	17.3406	15.4111	15.1463	13.1999	12.1826	13.185	11.0653	23.5799	19.1243	17.1569	18.2324	19.1476	18.4447
MSTRG.1120	PGSC0003DMT400020038	4.4318	3.65104	1.72237	1.44468	1.26437	2.49651	2.79117	2.56239	2.33525	1.99895	3.07185	3.1283	3.47218	2.18456	2.3532	3.45155	2.93581	4.7638	1.86943	1.67529	1.20863	2.20846	1.49896	0.947144	3.36918	2.32514	3.27351	1.56821	1.83821	1.41992	1.48548	1.2967	1.29582	2.51269	2.544	1.51459
MSTRG.1123	PGSC0003DMT400062439	1.07757	1.4563	0.839061	3.04545	3.28905	2.36427	1.00639	1.05654	1.12054	0.625719	1.92625	2.05912	3.75042	3.56782	2.02372	3.15656	2.9184	2.67243	1.20811	0.902691	0.940105	4.24425	4.12863	2.47035	5.79492	3.55856	2.50404	1.45375	1.06519	0.90104	2.81464	3.93676	2.77165	3.02738	1.46301	1.55212
MSTRG.1116	PGSC0003DMT400068977	329.892	318.002	465.25	650.518	619.768	679.258	624.948	666.385	669.361	518.559	418.191	344.107	445.386	531.83	578.648	407.753	471.8	495.123	405.363	415.486	455.705	624.594	617.416	732.379	417.713	389.854	518.233	328.235	464.079	559.889	664.078	636.598	583.841	627.282	568.664	650.074
PGSC0003DMG400013121	PGSC0003DMT400034152	0.379337	0	0	0	0	0	0	0	0	0	0.738563	0.371164	0	0.210984	0	0	0	0	0.376994	1.30578	0.906837	0.374464	0	0.170535	0.433996	0	0	0.930365	0	0.374169	0.196953	0	0.138562	0.323473	0.112397	0.671489
MSTRG.1127	PGSC0003DMT400062438	16.8841	14.7731	49.7234	46.2539	46.5594	51.8811	58.1166	45.3775	39.7553	52.9751	52.289	9.58656	38.0959	49.3282	53.0053	32.4041	30.0388	24.8123	12.2998	52.2492	55.2499	43.0812	38.45	57.9021	31.1425	38.3374	30.8703	11.2059	15.1208	19.8972	51.379	51.8817	49.1043	39.4981	48.4622	50.565
MSTRG.1130	PGSC0003DMT400034149	2.8598	3.45084	0	0	0	0	0	0	4.37021	0	0	0	0	0	0	0	0	0	2.09962	0	4.13708	0	0	0	0	3.17416	0	0	3.09388	0	0	0.763801	0	0	0	3.2684
MSTRG.1149	PGSC0003DMT400010816	0	0	0.806709	2.56049	1.27427	0.633365	3.32952	5.23688	2.20966	0.725021	1.62567	1.257	1.15986	2.32927	1.58531	1.14599	2.51413	3.24613	1.04862	2.24209	1.00834	0.578893	0.619479	1.54971	2.40285	2.27438	1.56833	0.336207	0.251703	0.201779	2.09874	2.37418	1.87405	2.47777	4.73264	3.21288
MSTRG.1148	PGSC0003DMT400010802	0.911455	0.396607	0	0.967464	3.52065	10.9943	2.53126	14.935	4.04804	9.76521	0.882625	10.4452	4.8572	8.41013	1.92456	0	1.00788	3.66339	6.97229	0	1.40997	4.72057	2.36393	1.46765	2.42429	2.57777	4.36589	1.59559	0.04159	1.63297	10.5465	3.99128	4.05807	3.0822	5.23134	3.39392
MSTRG.1148	PGSC0003DMT400010800	3.63734	1.70314	10.9298	6.95534	0.365606	14.9915	10.9751	13.7373	2.60505	15.8827	14.4691	14.8537	12.0825	12.0788	0.347523	0	1.85903	2.55081	14.1291	17.5904	0.135447	12.9156	0.310199	13.1373	1.4464	0.401529	9.47449	7.99469	14.4524	15.4126	11.9056	8.68254	11.1518	2.51216	1.46785	11.9247
MSTRG.1151	PGSC0003DMT400010803	3.47681	6.02912	3.29971	4.18739	1.60527	1.19602	2.09493	2.78446	2.57807	1.70189	4.28942	7.55667	3.75001	2.12534	1.62387	4.32163	4.39335	2.07484	5.24345	0.840857	1.28519	2.30833	3.28333	3.4563	2.74399	3.3889	4.87782	2.55567	3.0542	5.85638	3.48209	2.93719	2.05683	2.21614	1.92753	3.98736
MSTRG.1136	PGSC0003DMT400034158	0	0.114231	0	1.39157	0	1.51978	0.646258	0	0.087478	0	0	0.510946	0	0	0.061226	0.325042	0	0.29186	2.21292	0	0	0	0	1.99462	0	0	0.509846	0.154041	0	0.085847	0.090375	0	0	0.227191	0	0
PGSC0003DMG400023276	PGSC0003DMT400059840	0	0	0	1.8675	0	0	0	0	0	0	0	0	0	0	0	0	0	0	0	0	0	0	0	0	0	0	0	0	0	0	0	0	0	0	0	0
MSTRG.1156	PGSC0003DMT400054286	1.04833	0.663159	4.00019	2.41475	1.77233	0.381331	1.91417	1.94455	1.83274	4.59255	4.0562	3.55814	0.734048	0.252346	0.375593	1.96935	0.306422	0.837788	2.36597	2.60609	3.20356	0.852395	1.93483	0.219177	0.598599	1.18121	0.225223	0.896589	0.279123	0.639639	0.835181	1.11464	0.792637	0.597157	1.032	2.84955
MSTRG.1162	PGSC0003DMT400076890	2.9684	11.788	13.993	5.20492	3.80857	10.164	10.1981	9.23473	3.30155	10.6236	21.7382	11.7955	4.50084	9.4002	7.19264	10.7357	8.72612	5.97173	5.53347	19.159	15.9306	6.22323	5.87273	3.98025	5.1036	12.8853	7.57535	3.19155	7.76029	5.61476	3.79628	3.12166	5.4502	12.7819	9.26058	17.8528
MSTRG.1167	PGSC0003DMT400076895	3.51996	4.68333	3.41062	4.0589	3.41843	3.11065	2.72954	4.13677	3.33668	4.30646	2.80416	3.03015	4.23621	4.2158	2.73912	8.3479	5.88984	6.20008	1.94608	2.11295	1.79478	2.24518	2.13712	1.43963	5.0841	3.36418	4.05628	3.24876	3.4947	1.5111	2.67654	2.22489	1.54037	3.32839	2.6586	1.90689
MSTRG.1164	PGSC0003DMT400096426	0.33898	0.697037	0	0.569143	0.713347	1.30929	2.43234	7.99034	0.849237	0.149175	1.23468	2.57272	0	0.186653	0.674867	0.525387	0.134013	0.952559	0.231685	1.2042	0.063993	0.055399	0.313659	0	0.320173	0.504752	0.222124	0.713539	0.590878	0.664269	0.408321	0.438608	0.432136	4.43915	0.421345	8.95045
MSTRG.1164	PGSC0003DMT400076880	0	0	5.88475	0	0	0	0	4.04196	6.48242	0	0	0	3.96008	0	0	0	0	0	0	0	0	0	0	2.64879	0	0	0	0	0	0	0	0	0	0	4.96706	3.91353
MSTRG.1163	PGSC0003DMT400076882	0	0	21.0223	0.111025	12.2033	0	0	0	0	0	15.0606	1.81633	16.8576	0	7.74724	0	0	0	0	0	0	20.7022	0	20.8403	24.5555	20.6796	0.199855	30.3221	25.4479	0.110079	21.5201	20.1049	16.7163	26.6529	0.527438	21.3576
MSTRG.1163	PGSC0003DMT400076881	0	0	0	0.86793	0	0.909141	0.190181	0	0.416923	0.270243	0	0.869347	0	0	0	0	0	0.440815	1.1947	0.17246	1.48935	0.142777	0.511333	0.098809	0.010406	0.525486	1.4789	1.13647	0	0.076264	0.118484	1.76702	0	0.349567	0	0
MSTRG.1168	PGSC0003DMT400061831	0.451766	0.77306	0.364083	0.150391	0.399087	0.606147	1.03907	1.61601	1.13654	0.717476	1.2574	5.76007	0	0.298792	0.615497	0.563782	0.095452	0.158673	0.253436	0.323562	0.259781	0.298736	0.442617	0.317751	0.495605	1.87815	0.119059	1.02295	0.070165	0.373075	0.4836	0.426555	0.338479	2.97794	0.748031	3.58614
MSTRG.1169	PGSC0003DMT400061829	16.9279	0.876947	6.02235	2.71644	2.7398	2.25813	3.88868	2.86896	1.11288	3.01689	1.98696	5.48534	5.85625	1.33098	0.944089	0.894245	1.37329	3.52471	3.014	1.15106	1.20258	2.08904	1.25602	1.71277	0.972954	0.380561	5.35884	2.49125	3.95709	4.24342	1.79687	1.26648	1.6439	1.82311	1.37444	0.706732
PGSC0003DMG400024052	PGSC0003DMT400061824	0.66765	0.778858	0.826667	0.186086	0.330321	0.489401	0.747412	0.310593	0.972045	0.822895	0.593926	1.23243	0.673285	0.451151	0.359622	1.16486	0.218921	0.309802	0.393009	0.656538	0.696509	0.422988	0.164964	0.347424	1.14426	0.328695	0.952026	0.06299	0.348213	0.637421	0.567051	0.131867	0.497941	0.299143	0	0.08879
MSTRG.1170	PGSC0003DMT400061835	0.909256	8.36666	61.1665	10.9503	30.6612	4.46351	59.5798	11.7234	9.99052	3.04526	140.839	58.2685	0.248238	27.879	52.6875	53.8371	44.5515	48.1594	29.5062	63.9858	56.5426	55.3858	22.8312	25.0506	28.9838	1.81594	40.9483	66.7314	17.9999	30.1228	1.61017	2.21341	34.0679	35.9472	4.34432	76.3296
MSTRG.1173	PGSC0003DMT400048829	16.7048	1.82323	11.747	10.6639	6.91348	10.1414	2.29425	9.1881	9.69113	12.8803	12.7762	14.1217	10.1838	8.01968	4.94955	10.9392	11.8934	13.3197	9.92106	11.1703	7.02034	7.94859	10.7067	9.65579	9.57954	15.0382	12.7331	9.98414	6.1587	4.93741	9.7192	7.46862	6.94293	10.1914	6.08553	11.2983
MSTRG.1176	PGSC0003DMT400048825	0.391132	0.294483	0	1.49195	0.179869	0.824266	0.928076	0.328436	0.877807	0	0.342853	0	0	0.43509	0.068553	0.945075	0.686367	0.937899	0.110935	0	0.32924	0.555657	0.132126	0.096093	0.954414	0	0.263318	0.416585	0.354825	0.297281	0.556377	0.464669	0.424209	0.583548	0.435785	0.458025
MSTRG.1178	PGSC0003DMT400077677	1.40008	1.05021	0.961252	0.357099	0.519839	0.982346	0.607858	0.676687	0.680582	1.10629	0.877147	0.335994	1.17051	0.413467	0.357094	1.92428	0.380678	0.82605	0.630881	1.38361	0.953039	0.522475	0.326866	0.388239	0.677816	0.909754	0	0.466033	0.812245	0.56067	0.481728	0.491959	0.590514	0	0.44612	0.695441
MSTRG.1180	PGSC0003DMT400071563	3.18185	0.115116	0	0	0	0	0.902268	0.608874	0	0	0	0	0	0	0.048499	3.27081	0	0	0	0	0.80847	0	0	0	0	0	0	2.64622	0	0	0	0.091682	0.631682	1.06974	0.001923	0
MSTRG.1189	PGSC0003DMT400071565	1.79299	7.21775	1.51659	0.638771	0.971153	1.29313	0.395534	0.876627	1.74704	0.747606	0.176014	1.02784	0.9847	4.5967	2.72895	3.62779	2.49842	1.35089	0.22067	3.03805	0.240128	1.02727	2.22933	3.8174	2.36669	2.1797	1.74988	3.17345	3.86721	1.16101	0.650552	0.930459	1.37613	2.87616	0.62501	2.30304
MSTRG.1185	PGSC0003DMT400071567	9.43508	14.2897	0.535585	0.881334	1.27926	1.02408	1.2112	2.21045	2.05518	0.394708	0.654919	2.61088	1.03556	3.37706	2.33784	2.98217	0.709176	1.22932	2.31147	0.766715	0.628819	1.24596	1.12192	1.31451	2.03185	2.41823	6.19124	5.24883	4.01496	2.33982	2.29208	0.873326	1.89579	4.49833	1.31992	3.22303
MSTRG.1187	PGSC0003DMT400071568	0.399707	0.873061	1.91867	1.28567	0.827416	0.46177	2.10026	1.33137	0.881459	1.38756	1.02523	0.709225	0.820257	1.03857	0.715562	1.44544	0.812023	1.17917	0.229356	2.53206	1.95504	0.8235	1.25558	0.676199	1.38214	0.884821	0.290256	0.467613	1.02215	0.906214	0.597808	1.11109	0.883643	2.94072	1.19847	0.793804
MSTRG.1188	PGSC0003DMT400071564	0.770926	0.830952	1.56805	1.31491	1.29261	1.53488	2.04414	1.03832	2.53509	1.81583	0.889192	0.757796	0.995155	0.612408	1.8694	1.0195	0.993722	1.05458	0.963756	1.92612	1.04272	1.82722	2.04419	2.5945	0.680244	1.51376	1.4176	0.927501	1.90205	2.55974	1.4057	2.29886	1.49245	2.36601	1.03892	2.02561
MSTRG.1195	PGSC0003DMT400071547	0.986417	0.329156	0	2.51736	1.3451	2.06797	1.5027	2.2132	1.39029	0.623163	0.657671	0.163586	1.3408	1.66698	1.05148	1.1874	1.08239	0.97142	0.0583	0.191837	0.262012	1.39552	1.89128	2.45154	0.875637	0.716571	1.13716	0.173321	0	0.562349	2.48899	4.39	2.54051	1.41986	1.89168	0.984523
MSTRG.1190	PGSC0003DMT400071541	0.99831	5.05068	3.62764	4.2129	6.38793	2.28811	3.62578	3.47649	2.43273	2.2916	1.21694	5.64403	0.708855	2.38455	2.17465	2.64171	4.10696	2.15742	2.85062	5.73548	1.85284	3.19861	0.817299	0.872658	3.52695	3.89266	1.25561	3.80541	4.05882	1.36931	1.50363	1.93891	1.55687	2.48887	2.76844	2.98368
PGSC0003DMG400011307	PGSC0003DMT400029412	0.925937	1.10268	0.778848	0.489903	0.22818	0.149658	0.546272	0.499944	0.19567	0.322015	0.45584	1.87392	0.596655	0.649433	0.366915	0.555503	0.817044	1.10753	0.552847	0	0.425	0.253723	0.249453	0	0.446334	0.187371	0.281474	0.266079	0.449646	0.747935	0	0.249145	0.479753	0.434888	0	0
MSTRG.1197	PGSC0003DMT400029422	0.306157	0	0.435013	0	0	0	0	0	0	0	0.504844	0	0	0	0	0	0	0	1.45371	0.275549	0.335458	0	0	0	0.068225	0	0	0.387053	0.125567	0.69658	0.105972	0	0	0	0	0.100249
MSTRG.1200	PGSC0003DMT400029511	0.472949	0.220785	0.483122	0.35854	0.518542	0.477057	0.731435	0.738364	0.330372	0.544353	0.327563	0.345882	0.284636	0.800217	0.719974	0.442637	6.78154	0.544215	0.586674	0.282903	0.284797	0.251948	0.439111	0.68068	1.50953	0.397626	0.661854	3.57286	0.526807	0.110966	0.556612	0.387273	0.423638	0.566029	1.03739	0.774242
MSTRG.1196	PGSC0003DMT400029456	282.602	319.623	14.6218	19.303	41.2589	23.8032	15.284	53.1673	28.991	13.8243	23.7074	277.11	6.52516	12.2185	23.894	13.4313	8.9211	11.2039	3.50293	13.7305	8.09473	5.67307	16.272	10.8728	9.51359	57.6657	7.76333	273.833	245.514	277.96	12.6278	14.3837	19.4045	50.8843	39.4177	63.6482
MSTRG.1205	PGSC0003DMT400029423	0.532365	0.445397	0.314645	0.988953	0.651471	0.889919	0.640161	0.54203	0.456315	0.774791	0.330932	0.567833	0.784512	0.719507	0.366807	0.970436	0.313981	0.615226	0.362106	0.513928	0.35418	0.601584	0.482228	0.476709	0.938504	0.674534	0.317828	1.0066	0.23994	0.241854	0.823478	0.501592	0.436376	0.863151	0.606407	0.737215
MSTRG.1206	PGSC0003DMT400029426	20.5602	22.1595	16.1555	23.1087	23.2914	32.5781	22.0986	31.041	40.3667	9.71322	12.1228	15.8313	23.0348	16.0379	30.3188	16.2486	13.2738	25.1258	19.3946	8.76856	8.36763	25.7747	34.9667	26.0912	13.0926	18.3651	17.6367	16.3194	23.0954	19.1618	33.0522	23.2729	34.0648	34.9856	28.8905	38.2434
MSTRG.1202	PGSC0003DMT400029466	29.4533	26.7802	39.1469	41.7538	38.4833	46.2174	48.2746	52.3011	47.6649	49.8768	51.9887	33.2521	61.0955	40.1106	69.5469	31.1998	21.3116	29.1873	20.9539	43.4297	37.7138	48.514	51.7375	40.3765	27.8236	44.6352	25.2879	22.8206	20.9979	19.6631	40.2714	36.5428	46.3629	37.7709	36.6558	45.2951
MSTRG.1207	PGSC0003DMT400097335	8.51252	11.8514	26.2883	37.993	41.6344	35.9096	31.5266	32.9549	37.146	22.4645	22.3593	11.3257	39.3224	39.3068	40.9031	24.1222	18.5453	21.4785	13.893	24.4808	25.3433	42.7772	42.7875	40.2295	19.2078	23.3746	19.1662	12.0955	18.9129	18.1887	40.2386	42.9433	42.1588	32.1502	35.6308	31.7833
MSTRG.1209	PGSC0003DMT400029468	0	0	0.076655	1.31505	1.4929	0.871526	0.76438	0.583848	0.41638	0	0.12667	0	0.721891	0.703867	0.721729	0.445282	0.351705	0.161844	0	0	0	0.645424	0.458868	1.16695	0.216617	0.111135	0.404838	0.080606	0.039224	0	1.2929	1.67767	0.520112	0.361596	0.865489	0.68707
MSTRG.1210	PGSC0003DMT400086027	0.225144	3.24313	0.25986	0.227261	0.191761	0.259658	0	0	0	0.277285	0.33547	0	0.214882	0	0.197981	0	0	0	0.819641	0.0775	0.064074	0.148167	0	0	0	0.219096	0.212442	1.06595	0.678699	0.208751	0	0	0	0	0	0
MSTRG.1208	PGSC0003DMT400029467	47.5889	54.5858	35.9663	31.0265	30.2023	28.9229	30.7333	25.5748	29.2712	24.9236	18.8817	48.8668	37.7905	28.3391	35.2988	38.488	37.0573	36.8679	54.0188	26.3044	24.706	33.7473	31.4215	35.128	30.5529	35.1501	31.1718	42.5314	45.5088	58.7264	30.7056	29.5912	44.2017	23.5261	24.4377	25.189
MSTRG.1216	PGSC0003DMT400029432	6.28827	6.78073	6.56075	4.9068	3.3346	12.1689	14.3342	3.06007	3.46676	3.84489	4.96338	0.995232	5.26879	4.30585	3.00203	2.57223	1.27775	7.5111	7.81772	6.82831	1.06155	1.35124	4.73696	1.39427	0.998669	1.77286	11.4221	6.82048	5.31016	0	2.8768	0.944546	3.41292	7.26723	1.66442	2.83507
MSTRG.1219	PGSC0003DMT400029480	0.528643	0.831062	0.070073	2.75229	0.474465	0.936101	1.23812	1.97441	1.65966	0.444797	0.056739	0.506772	0.983666	4.51182	0	0.884737	0	0	0.166405	0	0.115373	1.95801	3.57564	1.02405	0.352105	0.429924	3.21795	0.663949	0.574044	0	1.56274	1.80672	0.795377	0.787771	0.27018	0
MSTRG.1220	PGSC0003DMT400029487	0	0	0	0	0	0	0	0	0	0	0	0	0	0	0	0	0	0	0	0	1.54012	0	0	0	0	0	0	0	0	9.07981	0	0	0	0	0	0
MSTRG.1222	PGSC0003DMT400029492	1.82042	1.44387	1.81398	2.13883	1.32702	2.49216	1.41412	0.848645	1.14359	3.31235	1.52211	0.935417	1.03885	1.01346	1.50019	1.28303	1.0456	1.821	0.947563	1.94677	2.34359	1.09835	2.14361	1.09393	1.3799	1.31261	0.853979	1.24785	1.12085	0.579349	2.27316	1.36077	1.25488	0.855648	1.25085	1.7293
MSTRG.1221	PGSC0003DMT400029491	0.673213	1.5008	0.747512	0.857415	0.576569	0.665015	0.350944	0.928539	0.56938	0.711349	0.581318	1.43675	0.764185	0.947301	0.662293	1.06362	1.61313	1.05728	1.49601	0.521664	0.91149	0.535384	0.5405	0.486413	0.737891	0.904187	0.956897	2.50751	0.992273	1.07532	0.590323	0.604433	0.658099	0.480366	0.675971	0.618287
MSTRG.1217	PGSC0003DMT400029479	107.499	97.6662	394.823	151.988	162.643	319.548	269.82	546.184	410.441	335.446	480.641	115.126	248.289	158.12	610.578	126.714	135.644	318.929	111.024	556.244	528.966	160.895	432.446	346.005	103.861	732.824	108.615	81.7693	102.597	97.8814	294.938	173.742	676.095	239.895	341.197	453.587
MSTRG.1226	PGSC0003DMT400029497	12.4022	13.0995	13.9766	10.7619	7.45069	8.8144	8.59534	9.00777	11.743	18.6707	16.8315	12.8498	6.76356	10.2007	8.64619	12.6658	10.6498	10.6831	8.37517	21.562	15.3448	9.58028	13.4467	8.50025	10.7994	9.6922	5.47066	9.39282	10.4071	16.6284	10.8174	9.13936	11.2213	11.1423	9.22754	9.06994
MSTRG.1229	PGSC0003DMT400029441	8.53568	6.91501	10.8455	10.4416	7.46515	9.93795	9.73162	11.5302	11.1423	13.0094	10.2164	8.44697	8.99795	8.98841	9.82441	9.61272	7.2695	8.64323	7.44696	11.1166	11.6825	8.42854	8.83546	7.53375	6.59045	12.1689	5.62008	8.23772	7.92356	6.74868	8.77019	9.0131	7.90052	7.7375	8.22358	11.5601
MSTRG.1230	PGSC0003DMT400029504	2.15729	2.69796	0.521459	1.49272	1.11924	2.14108	2.01373	0.285713	1.14087	0.609153	0.458344	1.58013	1.09004	1.03676	2.27109	2.36296	2.08979	3.62393	0.300476	0.393896	0.458941	1.61897	2.68899	2.24091	1.84499	3.57499	0.448981	4.91891	2.53632	2.37233	2.71307	0.956581	2.68056	1.68524	1.03163	1.49924
MSTRG.1231	PGSC0003DMT400029445	1.61991	0.826602	2.23665	5.82519	7.03799	7.0806	3.84628	4.40524	5.62974	5.988	1.84627	0	11.6935	8.7176	13.8786	8.70344	5.24365	4.93278	2.2324	1.98108	6.98688	13.3579	7.81785	2.57157	5.20004	2.52318	9.98048	0.718014	0.29816	1.24988	4.86458	7.54536	5.07666	5.5816	0	3.84347
MSTRG.1228	PGSC0003DMT400029439	408.197	410.039	360.848	475.828	523.821	508.457	535.745	558.204	572.626	361.818	318.323	432.077	435.015	458.301	559.38	423.468	499.121	553.227	373.14	382.427	372.059	518.076	599.111	605.906	357.002	580.485	397.051	319.993	349.142	484.858	492.616	547.03	575.979	446.15	552.583	596.092
MSTRG.1234	PGSC0003DMT400029447	4.21322	3.88451	5.19438	2.44561	2.99099	2.59016	4.20442	15.545	6.66936	5.98447	5.63902	3.64272	2.15844	2.78055	3.77171	2.27979	2.50428	3.08666	2.98212	5.74111	12.8798	2.25272	4.72654	1.87438	2.97221	14.8514	11.4824	2.60934	2.05271	2.11977	2.77974	2.74048	3.27432	4.37281	12.5591	15.7372
MSTRG.1235	PGSC0003DMT400029507	8.43476	10.0861	3.42045	2.96355	3.76031	3.25538	3.63791	7.5157	4.61241	3.46222	4.27423	6.94231	2.44478	1.82413	3.26879	2.39195	2.58241	2.22019	1.20253	4.24715	4.00799	1.13308	2.09972	2.88465	1.72846	5.72289	1.60682	7.14479	5.49766	11.3868	2.20411	2.34819	4.3713	4.12845	6.18165	12.0806
MSTRG.1237	PGSC0003DMT400058350	1.1862	1.84473	2.64857	1.00474	0.858022	1.92229	0.666207	1.29603	0.955392	3.70066	2.03412	1.38636	1.60267	1.57454	1.59682	1.38806	1.6889	1.68961	1.54855	2.62345	3.16511	1.1883	1.45826	1.62019	1.42718	1.19376	0.764211	2.28635	0.992583	0.697389	1.69533	1.70992	0.691284	1.17651	1.26073	0.836579
MSTRG.1239	PGSC0003DMT400058346	11.2948	9.70445	7.57975	7.6436	6.86469	10.4147	7.09901	7.94844	6.66867	9.7537	7.43759	12.7142	6.17477	7.25022	7.6965	8.72988	7.53013	9.74285	11.5076	9.26945	9.30607	7.5124	7.58034	11.2862	6.44586	6.68365	6.10367	9.16484	12.9267	12.7403	7.25031	7.4297	8.15508	5.03673	3.22215	7.93673
MSTRG.1242	PGSC0003DMT400058414	1.43037	2.55195	1.96166	4.39736	7.27081	4.37389	6.5472	5.80877	6.35483	8.7415	8.84941	2.62882	0.477965	2.79505	3.80883	2.02102	2.57149	1.74151	2.07385	4.59798	4.28744	3.75102	3.26923	2.85078	3.14437	5.39888	3.6404	1.85645	1.50567	3.56477	4.37969	5.98154	3.94541	9.10038	10.2554	7.88282
MSTRG.1240	PGSC0003DMT400058345	3.59573	4.46694	4.57303	6.53719	6.39914	7.8232	5.98964	8.53012	7.94454	5.77673	5.40108	5.41029	4.55704	4.93119	5.94124	4.81653	2.93671	4.06072	2.85659	4.98404	4.47982	4.7618	5.44477	5.29607	3.96784	10.2712	3.26611	6.25997	1.95675	1.05249	7.56145	5.82401	5.31307	5.77465	7.19534	7.48449
MSTRG.1251	PGSC0003DMT400058344	13.7019	13.9244	11.1663	15.059	12.7006	11.5723	21.6328	12.3691	16.2968	8.18035	11.0603	13.9791	15.7265	17.7443	14.1534	24.3042	18.9993	25.9049	11.8192	6.60426	7.62402	21.0232	20.1879	12.394	17.6957	24.6049	18.0112	13.8241	9.83563	14.5115	15.1261	18.168	15.9004	15.6594	19.4689	13.867
MSTRG.1252	PGSC0003DMT400058381	5.89811	7.75666	11.913	9.61107	6.73588	7.53192	3.62227	1.89224	3.64677	8.31987	6.45017	7.22986	9.74215	8.62827	7.49495	8.01293	4.85897	0.084444	14.8673	6.11291	8.77998	9.73929	8.66405	6.87771	5.41702	4.21043	0	11.2646	0.285543	14.2482	6.85646	6.16566	6.6108	4.59219	3.10888	4.55719
MSTRG.1253	PGSC0003DMT400058342	17.9861	11.0455	15.6495	28.4282	15.4908	23.0245	5.57059	20.3386	23.0323	19.4764	20.2223	13.1329	22.9988	23.3104	10.9951	71.2557	42.3433	48.8125	32.4739	14.4158	12.9203	11.4075	6.53756	5.71826	27.7679	17.3258	38.2006	11.3222	16.2336	16.5773	9.21252	12.5945	26.0931	28.8431	20.3338	31.9006
MSTRG.1258	PGSC0003DMT400058330	2.31227	4.31451	1.74131	3.73718	3.28221	5.89096	3.5663	4.77506	5.75133	2.47125	1.86395	3.11767	6.1554	7.82094	4.7598	5.4355	5.58209	3.86758	3.56136	1.05881	1.3891	9.13035	9.40859	10.1483	9.9495	5.5877	6.81762	2.61969	2.39307	2.13984	9.80345	7.48418	7.71891	4.00277	4.87107	4.11873
MSTRG.1261	PGSC0003DMT400058325	10.0219	9.58681	3.98661	0.919653	1.77271	5.03241	3.77123	1.03029	0	6.2549	3.29383	5.49427	2.03817	4.96741	5.72483	5.35276	5.82142	5.51719	3.85785	4.6851	4.31266	3.14682	4.65463	7.5912	7.7622	9.65507	10.0455	10.3272	17.6541	5.713	5.60888	1.9684	5.26814	2.95535	1.05777	1.46897
MSTRG.1262	PGSC0003DMT400058374	24.9425	8.98542	10.6981	6.39703	2.93646	5.0637	0.621515	0.6297	0.279847	7.30686	7.0912	39.9536	11.2829	3.10344	2.44234	4.5448	7.9331	3.07652	16.9628	6.89791	3.2374	2.12648	0.54297	4.5382	5.64273	1.69215	12.4469	40.4933	49.965	26.8726	3.91191	1.85101	2.73692	2.63525	0.224479	1.12283
MSTRG.1263	PGSC0003DMT400058372	1.51427	0	0	0	0	8.17073	0	0	0	0	0	0	0	0.646647	0.278029	0	0	4.38868	9.95316	0	0.032539	0	2.7904	1.96365	2.00095	0.334594	0	0.171148	4.8857	0	2.73055	0	0.416456	0.687909	7.51618	0
MSTRG.1263	PGSC0003DMT400058369	5.83617	4.19216	0	0	7.32743	0	4.35785	3.40782	0.22549	0	0	7.46155	0.501214	2.03409	4.22553	0	0	12.784	13.9523	4.45474	3.40665	3.39381	0.656478	9.9481	9.40253	0	0	2.26106	14.3175	0	8.6378	10.0409	0.072551	5.58087	9.83848	0
MSTRG.1264	PGSC0003DMT400058419	0.842882	0.553146	0	0	0.323382	1.52231	0	0.9341	0.282399	0	0	0	0	0.490681	0.494131	1.32212	0	0.477637	0.146961	0	0	0.258862	0	0.263368	1.04148	0.210826	1.60171	0.5328	0	0.138566	0.717709	0	0	0.359376	0.332993	0.333791
MSTRG.1259	PGSC0003DMT400058376	100.981	72.7078	37.2815	55.1123	3.26398	53.2248	51.7986	55.9915	60.945	47.174	0.080222	0.557196	5.79339	1.64407	1.93143	7.04149	5.11346	6.31345	2.18016	32.992	28.2002	59.3166	59.2463	35.4535	2.73241	83.2046	43.2998	6.86237	7.50124	24.7602	3.69133	4.64195	5.83254	3.96986	49.4697	54.7569
MSTRG.1266	PGSC0003DMT400058366	24.1633	18.1989	27.9593	11.488	13.9259	19.5125	11.8325	14.5531	18.2721	34.6601	31.8065	19.4394	12.0331	10.9377	15.0723	14.5718	13.8342	15.6007	20.2469	26.0847	26.8955	19.912	20.9686	15.0942	13.6098	19.185	17.6284	14.5568	18.7966	22.2511	14.2779	17.3956	16.3766	24.0468	14.5634	14.3886
MSTRG.1268	PGSC0003DMT400058363	0.34706	0.854558	0.652605	1.44727	1.59614	0.891872	0	0.855009	0.148587	1.14886	0.268911	0	1.31747	1.95623	0.545897	2.56022	0.953032	2.01795	0.397927	0.703186	1.28131	2.21511	1.07026	0.993023	3.91233	0.052604	1.153	0.438766	0.356103	0.473104	0.570859	0.537003	0.148106	1.52252	0.621114	0.286974
MSTRG.1270	PGSC0003DMT400058323	27.1742	25.6095	31.0951	38.6271	41.9582	43.4908	46.2345	30.2492	31.0683	41.3617	31.5225	22.5167	30.6877	38.2785	32.7716	38.6215	26.3528	38.4483	30.947	29.488	34.4621	30.176	29.1089	32.7783	38.3911	24.4217	29.898	27.6347	17.7109	14.4423	35.7952	40.5116	34.1295	27.8171	34.8503	27.5561
MSTRG.1273	PGSC0003DMT400058417	1.65557	0.467998	1.90315	5.97201	6.0828	3.19112	6.09733	2.27513	0.93218	0.239343	0.089445	1.28981	0.621136	7.06503	0.573891	9.4472	17.8182	8.95648	1.56899	0.766193	0.870237	1.23729	1.63784	4.02461	8.36603	3.70389	7.51371	2.07026	2.96178	2.7065	7.99614	6.96384	3.73587	2.25717	5.80007	4.74959
MSTRG.1275	PGSC0003DMT400027645	38.1477	34.5947	25.6804	18.835	17.5641	21.3497	16.8843	20.4081	19.579	20.3581	16.212	38.382	19.4088	17.4759	20.5898	21.1924	22.6791	24.5869	29.2494	27.4794	20.6534	23.2878	22.2785	18.4435	20.5088	21.5673	22.1268	23.6854	29.2121	30.8154	21.7078	20.4529	23.5657	20.9865	15.4094	16.3859
MSTRG.1280	PGSC0003DMT400027666	0	13.7469	0	0	0	6.54937	7.50904	5.14398	0	0	0	0	0	0	1.04709	0	0	2.67569	0	0	1.27907	2.5828	4.14161	0	2.59167	0.417501	4.02033	0	0	0	1.65368	0	1.74807	5.61498	3.65568	5.03862
MSTRG.1282	PGSC0003DMT400027661	2.44942	1.96542	3.92544	15.9569	20.4212	18.417	15.5716	30.1737	17.966	6.92495	9.45863	2.08195	10.7189	12.5492	15.1469	12.074	8.03645	9.50143	5.91025	4.14209	5.56149	8.41398	13.903	18.1864	9.14642	15.9539	9.68087	3.08813	1.06975	1.65283	17.228	19.3992	13.1869	13.3574	21.82	25.2237
MSTRG.1281	PGSC0003DMT400027638	5.19803	4.58103	7.53751	9.81619	9.58418	8.92352	10.3416	7.1799	9.70913	4.91593	4.96788	3.33297	7.27548	12.7905	10.2459	8.57123	7.70983	7.80316	6.20144	6.07841	6.94206	12.825	12.3176	11.1907	9.34286	5.36175	8.04081	4.19354	6.03043	7.0667	10.3282	11.6012	8.62946	8.85936	8.2089	6.96857
MSTRG.1278	PGSC0003DMT400027671	9.06635	4.10909	0	3.13321	0	3.89357	4.0095	5.07378	3.41889	2.02411	3.13827	3.56038	4.40738	4.75861	3.4562	4.65466	4.28703	5.95611	5.60337	4.13814	3.23642	3.60785	2.56265	2.53848	4.21449	3.38369	3.21662	6.66795	4.39043	5.29798	2.81175	1.46657	4.32322	2.94484	4.99609	3.27494
MSTRG.1279	PGSC0003DMT400027668	3.80287	5.9575	8.39089	4.37914	3.09244	2.05847	1.57819	0	3.44078	3.11333	4.04754	5.53074	3.55461	1.26307	3.39199	4.0108	3.83882	4.05283	5.52772	4.21993	3.22407	3.87096	5.03019	3.20964	3.06284	3.44069	5.90116	0	4.56018	2.28286	3.50074	2.65399	3.12955	5.79064	2.54175	1.55202
MSTRG.1286	PGSC0003DMT400027628	0.722258	0.329156	1.50757	0.486034	0.432973	0.582344	0.68656	1.81345	0.753682	1.09769	0.498236	0.456407	0.236985	1.11587	0.527505	2.5335	0.18365	1.45421	0.524706	0.856358	0.642342	1.12558	1.26573	0.347822	0.36917	0.772329	0.96626	0.317049	0.462855	0.242419	0.255206	0.245825	0.366419	0.755026	1.39994	0.884879
MSTRG.1287	PGSC0003DMT400027627	1.26113	0.277726	0	0.427178	1.20799	0.655136	2.38063	1.75873	0.625285	0.749943	0.840774	0.414079	0.39991	1.41227	1.02414	1.92032	1.01058	0.241456	0.261205	0.291352	0.835848	1.3814	1.06796	0.404792	0.797279	0	2.24619	0.53502	0.260356	0.208716	1.09863	1.8294	0.609057	1.27411	1.21882	1.2519
PGSC0003DMG401010654	PGSC0003DMT400027623	0	0	0	0	1.38074	0	0	0	1.30757	1.42194	0	0	0	0	0	0	0	0.751179	0	0.352374	0	0.438595	0	0	0.508323	0	0	0	0	0	0	0	0.482981	1.04383	0	0
MSTRG.1284	PGSC0003DMT400027634	27.1742	29.8324	2.65926	9.03151	5.03464	18.1191	0	11.8096	3.96426	46.8564	19.8262	1.21697	8.22263	15.8504	1.89892	7.40674	24.1489	3.1979	1.48752	13.5911	59.066	3.44481	5.32973	0.614863	24.416	5.4439	11.5233	7.73603	10.9444	10.4515	11.5278	6.39165	5.27589	5.26509	1.34463	5.14927
MSTRG.1283	PGSC0003DMT400027659	331.172	272.546	672.874	626.813	543.194	573.217	586.36	598.497	625.855	724.015	780.683	378.592	541.203	547.175	532.698	526.129	441.161	595.52	344.259	569.806	487.527	533.314	548.522	381.286	497.19	858.45	403.368	245.106	193.669	177.576	680.809	558.583	683.822	474.307	579.449	506.935
MSTRG.1291	PGSC0003DMT400027620	4.75827	0	10.9581	1.08044	18.4623	0.368795	1.92065	0.345299	24.4324	21.6794	21.2745	2.25106	14.7422	10.7199	15.7013	0	14.7649	17.2768	5.92727	0	13.3381	18.645	17.3443	13.3236	14.4537	9.77002	12.6109	0	3.76608	0	0	15.1722	16.1751	19.0528	21.6517	0
MSTRG.1289	PGSC0003DMT400027658	48.4079	36.5633	73.3315	34.6314	28.9923	39.3744	34.9803	21.5784	37.6256	98.3487	92.962	44.7556	35.7847	29.6462	38.2687	29.4968	28.3881	35.0962	33.0588	65.398	62.7413	34.8039	39.2217	33.0308	32.2904	43.0416	30.7822	44.4874	39.8994	27.87	35.7148	29.2395	34.4814	33.4004	38.4288	38.4264
MSTRG.1292	PGSC0003DMT400027652	60.7034	68.9461	377.382	346.581	322.279	349.818	239.788	263.586	315.014	511.006	481.79	68.7114	260.256	329.173	328.761	199.928	209.265	196.538	93.5373	445.615	475.599	311.443	347.073	361.67	159.78	199.198	261.803	65.289	88.4065	100.787	287.204	321.038	281.377	287.85	312.096	301.044
MSTRG.1296	PGSC0003DMT400058793	0.211011	0.207252	0.170268	2.34448	1.99391	1.7643	1.42141	1.58259	1.62237	0.678851	0.068933	0	0.986297	1.83487	1.07124	1.5001	0.417651	0.787191	0.037038	0.262757	0.454009	0.974105	1.07289	1.90817	0.765569	0.749959	0.813607	0.328985	0	0.069845	2.27159	2.02109	1.16092	0.763395	2.088	1.71968
MSTRG.1293	PGSC0003DMT400027651	349.987	363.377	204.493	1245.62	1326.39	1317.63	1561.49	1282.98	1319.03	784.686	713.06	391.932	1094	1332.18	1248.11	760.606	733.096	805.233	458.746	733.131	836.195	1033.9	996.142	1360.38	593.97	632.243	669.094	361.181	484.214	571.874	1211.85	1387.57	1382.01	775.281	1403.15	1082.74
MSTRG.1295	PGSC0003DMT400058792	2.78246	3.03184	3.14702	3.138	2.36319	3.90063	2.88371	2.41791	2.39481	3.16605	2.05284	4.50815	1.46758	1.63188	2.26882	2.364	1.71521	2.20853	3.123	1.34294	2.07571	2.41249	2.12832	1.85922	2.0784	2.97383	2.31338	3.01161	2.25205	1.57366	2.99394	2.89261	2.46258	1.93976	1.54321	1.97852
MSTRG.1298	PGSC0003DMT400090830	33.4527	21.9834	14.4503	10.8674	7.82005	10.2659	6.8502	11.6652	4.31251	15.1368	11.2659	30.6216	8.45625	8.91695	8.09793	19.7775	13.2631	15.5729	32.6551	19.6163	9.67894	2.06883	3.83027	11.0895	14.0554	24.8315	16.505	39.2801	18.1717	3.60867	11.608	10.449	15.6168	3.56268	7.29075	14.662
MSTRG.1297	PGSC0003DMT400058815	18.5796	22.2537	17.5177	13.6494	18.0809	16.0407	14.3552	15.5744	17.3635	10.9789	14.6394	19.9847	15.8399	17.1179	15.7206	17.9554	16.3968	16.7738	15.1303	11.4226	9.7538	18.4133	16.8776	12.4424	20.4461	23.52	17.5861	15.6288	13.0253	11.8023	17.9821	14.8702	14.0663	21.8207	13.3604	13.7696
PGSC0003DMG400022859	PGSC0003DMT400058831	0.72735	0.448183	0.288093	0.316391	0.203783	1.00217	0.149341	0.437537	0.250668	0.363244	0.377633	0.164545	0.394115	0.530574	0.703357	0.371895	0.294586	0.783142	0.730406	0.431687	0.31356	0.387665	0.780024	0.778881	0.444645	0.631241	0.486177	0.343361	0.485238	0.537351	0.317178	0.530905	0.59618	0.591415	0.32318	0.505337
MSTRG.1300	PGSC0003DMT400058819	0	0	0	0	0	0	0	0	0	0	5.58248	0	0	0	0	0	0	0	0	9.51179	0	0	0	0	0	0	0	0	0	4.89983	0	0	0	0	0	0
MSTRG.1299	PGSC0003DMT400058794	5.51982	6.08509	10.4202	5.5805	5.47054	5.70584	4.52135	7.761	6.62569	12.8086	13.2882	6.18284	3.81021	5.33349	6.01695	5.43511	4.65834	4.55788	4.75167	10.6979	14.9037	6.96734	6.84595	7.02754	5.51298	5.45214	5.11064	4.87199	6.27937	7.70755	6.93148	5.31261	6.62572	6.53693	5.17706	8.21942
MSTRG.1303	PGSC0003DMT400058822	0	0	0	0	0	0.557874	0	0	0	0	0	0	0	0	0	0	0	0	1.64449	0	0	0	0	0	0.103392	0	0	0	0	0	0	0	5.29593	0.097159	0	0
MSTRG.1301	PGSC0003DMT400058821	37.1992	37.0308	67.768	42.4914	38.1601	33.0275	14.0133	19.8107	20.8176	52.9907	51.534	55.5434	49.3106	38.521	42.5592	49.6192	27.5873	30.6467	66.2118	48.0886	50.7368	39.6832	37.4795	32.7032	34.9421	41.6752	33.0362	60.3815	53.4454	29.0992	35.9842	25.4964	31.3133	36.4721	24.372	33.7638
MSTRG.1308	PGSC0003DMT400058829	5.4308	3.53121	4.56256	3.57149	3.03915	3.29501	2.57316	3.41713	4.04723	4.67669	3.77659	5.66814	3.58477	3.8332	3.22458	3.4849	2.85502	3.73938	3.78345	4.48968	2.97505	2.75038	3.23468	2.11885	4.4121	6.57455	3.78183	4.82132	3.52889	3.48659	3.49904	2.45497	2.35777	3.7343	4.00598	4.08152
MSTRG.1304	PGSC0003DMT400058812	61.8647	67.3051	161.589	43.2781	49.2492	38.2227	38.8746	38.1693	38.8839	222.713	213.676	68.5308	37.1002	43.489	37.9943	39.289	30.2973	37.9337	32.28	205.497	247.056	46.1456	45.1472	40.4824	38.7447	39.9182	35.453	58.8602	56.1487	56.7334	40.6486	34.3356	35.7977	48.6682	37.3677	39.0494
MSTRG.1310	PGSC0003DMT400016087	4.15075	4.80106	1.10157	1.91414	1.38389	1.58327	1.19317	1.03942	1.1605	0.913354	0.898254	4.8347	1.84539	1.41326	1.23719	2.0938	1.49142	2.39558	2.77461	0.692246	0.401729	2.33058	1.79945	1.36643	3.02849	2.58632	2.69614	5.65952	2.86372	1.2055	2.25659	1.24244	1.28092	1.75613	1.08408	1.52306
MSTRG.1315	PGSC0003DMT400016057	2.20793	0.889262	0.290004	1.77623	1.39833	0.582287	1.26738	0.987509	2.61724	1.00807	1.01895	2.47209	2.62322	0.809567	0.580256	2.20138	2.00518	1.1145	1.80555	1.06835	0.360981	0.382266	2.8179	0.869219	0.457702	0.506418	3.40847	1.51484	1.46166	0.64678	3.26898	0.345673	0.528474	0.457438	2.88726	1.0619
MSTRG.1315	PGSC0003DMT400016058	0.400582	0.868708	0.294319	2.50381	1.71792	1.16858	1.58032	1.43182	1.92369	0.543355	0.736892	0.637929	1.30386	1.60836	1.50482	1.21285	1.1967	0.431563	0.361722	0.506736	0.459296	1.68693	2.02094	1.56605	1.73249	1.2331	1.69159	0.489236	0.546635	0.505967	2.25273	0.049673	1.85059	1.14022	1.96354	2.02653
MSTRG.1316	PGSC0003DMT400016092	0.227985	0	0	0.460259	0.645522	0.882338	1.14997	0.378986	0.687456	0	0.448414	0.218613	1.21939	0.251071	0.638331	0.161776	0	0.528273	0.093017	0	0.088241	0.895727	0.739875	0.348911	0.386037	0	0.443692	0	0.050493	0.269855	0.33854	0.733006	0.233176	0.692339	0	0.541707
MSTRG.1312	PGSC0003DMT400016091	10.0759	10.7231	10.4366	16.5759	14.8828	14.0109	12.6557	11.5526	15.1144	12.1781	11.2845	11.6346	9.77211	12.8482	12.8808	10.6395	8.89588	10.23	12.6804	8.68022	10.4264	13.9584	13.2212	14.212	13.0201	9.69742	11.0345	12.9949	9.07058	5.74675	17.8029	15.6034	11.5074	10.9723	6.45018	11.4445
MSTRG.1319	PGSC0003DMT400016119	5.05228	6.26541	6.22898	11.3517	9.66305	9.87042	8.66364	9.13038	9.33595	7.18264	6.74563	5.83685	6.75434	7.97204	7.54932	7.73703	4.55863	5.59804	5.73041	7.78149	5.78361	6.77101	9.5222	7.76889	7.31065	7.1821	6.21653	6.82877	4.41191	3.08768	9.2591	9.15269	6.38193	7.1922	9.20465	8.4198
MSTRG.1320	PGSC0003DMT400016059	4.85641	4.64251	6.13546	3.0593	2.21018	2.52257	3.12863	1.81612	2.89139	5.28743	5.67213	3.8896	2.37266	1.86618	3.12645	2.62798	4.26877	4.1661	3.9256	4.46377	5.28811	2.31061	2.81808	2.72095	2.49786	3.22318	2.48411	4.50781	3.11053	3.02398	2.81101	2.53586	3.12116	2.17664	3.32298	2.52302
MSTRG.1322	PGSC0003DMT400016099	2.31869	1.84139	1.06238	1.11548	1.46056	1.54276	1.34545	1.75971	1.16305	1.16949	0.327786	1.20479	1.15101	1.99666	1.42396	2.66942	1.91439	1.94818	1.66808	1.14196	1.13321	1.55145	1.47652	0.974414	1.48053	1.24634	3.2368	1.07512	1.29024	1.56952	0.504775	1.5619	1.51272	2.55232	1.40554	1.30499
MSTRG.1321	PGSC0003DMT400016060	0.911701	2.72272	0	0.25129	0.262099	0.771422	0.539403	0.138407	0.435171	0.871251	0.661661	0.486356	0.778134	0.936827	0.497116	0.734624	0.259794	0.527395	0.216882	0.470604	0.198541	0.429859	0.958107	0.357182	0.460095	0.676829	0.284791	0.994187	0.331411	0.184373	1.15724	0.244842	0.362218	0.649133	0.145553	0.346206
MSTRG.1324	PGSC0003DMT400016064	3.97281	2.76069	5.6439	7.00412	7.17728	7.15948	4.70483	7.32295	4.43559	8.25877	7.93498	4.76583	6.62061	5.95097	3.08735	4.31005	3.28114	5.54495	3.74698	7.78202	5.87976	4.34349	3.7686	8.58228	5.15265	8.08126	4.49095	4.19245	4.25442	2.95976	7.67631	5.35016	4.7523	7.64652	7.07525	6.85147
MSTRG.1326	PGSC0003DMT400016103	0	0	0	0	0	0	2.96245	0.08048	0	0.115791	0	0	0	0.035401	0.023817	0	0	2.01298	1.2884	0.046616	0.046834	0.01114	0.034175	1.49282	0.347999	0.079124	0.031946	0.083557	0.051615	0.692771	0.050584	2.17264	0	0.01473	0	0.077168
MSTRG.1330	PGSC0003DMT400016115	0.092326	1.48514	13.3935	5.39176	6.89487	0	4.95117	6.13751	4.62345	0	2.36275	0	0	6.79791	1.26809	0	1.00347	0	6.73651	10.2039	1.73938	0.266319	8.79254	0.878433	7.60916	8.73776	10.1294	1.36017	1.50069	0	0.502724	0	0	8.13875	4.15645	6.83881
MSTRG.1329	PGSC0003DMT400016069	50.3596	65.8163	250.602	84.4338	382.067	215.253	79.5042	59.3369	72.8035	333.824	265.03	92.1118	215.519	310.87	93.4239	193.472	115.898	119.25	114.22	251.279	275.639	186.294	116.161	45.9804	193.858	52.8403	146.286	149.942	101.456	52.6814	267.195	330.079	155.089	98.0332	126.141	78.7018
MSTRG.1334	PGSC0003DMT400016081	2.88399	5.38884	7.2457	9.22191	7.78088	9.89022	10.4476	10.7828	10.6925	5.67734	4.9793	6.41531	6.31154	9.25225	6.54918	9.98955	9.01231	5.96289	7.22126	2.21428	5.83149	8.81681	6.44982	7.54726	7.32075	5.10312	7.65879	2.43839	6.27266	5.39142	10.5252	10.2254	8.673	7.77767	11.0203	8.56748
MSTRG.1336	PGSC0003DMT400081769	0.904088	2.22368	3.21373	50.266	50.2748	29.7186	50.9618	35.9705	30.4544	4.47652	4.43004	0.906909	25.8545	44.1088	24.2638	22.0636	35.3299	23.0564	1.61143	3.0938	2.0573	23.9383	15.1241	61.6695	20.6203	11.0791	27.5026	0.352978	0.628651	1.40698	50.3457	83.872	37.4404	19.1083	44.737	31.4625
MSTRG.1335	PGSC0003DMT400016084	0.253382	0.209493	1.59802	1.99489	1.51423	1.46308	0.75307	0.848055	0	0.542136	0.906462	3.11732	1.85532	0.242221	1.48443	2.19481	1.52648	0	0.411917	0.994206	0.698526	0.561508	1.27703	1.21581	1.43236	2.05283	0	2.13758	3.05792	2.44782	1.43041	1.83757	1.55452	1.37948	1.2753	1.4416
MSTRG.1337	PGSC0003DMT400081724	13.126	6.4223	6.07965	25.8048	15.7987	22.4091	42.0547	21.0499	19.1762	5.82646	3.66165	6.69164	23.4724	32.3686	24.7665	18.0555	25.7814	17.6286	8.89418	5.01427	6.17447	13.296	12.7538	27.0544	20.3621	14.5981	18.6886	9.95895	11.5575	14.3383	30.9762	33.097	32.5061	7.69498	24.3997	16.2665
MSTRG.1341	PGSC0003DMT400081725	0.134659	0.468957	0	0.135926	0	0	0	0.279813	0	0.196219	0.085611	0.302168	0.332546	0.430649	0.570987	0.167638	0	0.14373	0.046958	0	0.121212	1.65687	0.515	0.142449	0.628225	0.376411	0	0.112359	0.295666	0.131941	0.697529	0.04224	0.227248	0.34019	0.477731	0
MSTRG.1332	PGSC0003DMT400016077	0	0.892087	0	0.186627	0	0	1.5348	0	0.350027	1.36509	0	1.09562	0	1.03355	0	0	0	0.839136	1.10536	0	1.23477	0.816552	0	0.10115	0.211028	0.356476	0	0	0.190509	0	0.491956	1.42864	0.717113	0.76359	0.701731	0.732017
MSTRG.1331	PGSC0003DMT400016072	0.392031	0	0	0	1.90159	0	0	1.91993	1.4417	0	0	1.9603	10.5337	0	1.00697	13.7675	0.334813	0	1.58606	1.55294	0.932515	0.788293	0	0	1.5749	1.29176	0.93514	10.6077	7.62919	0	0	0	1.45069	1.20578	0	1.47216
MSTRG.1343	PGSC0003DMT400081749	50.8381	40.7339	69.3939	53.6707	59.9875	55.4983	71.2651	58.7305	68.8194	66.2026	60.8726	43.8414	39.9185	52.4094	61.7265	44.9853	39.2053	46.6967	51.1379	64.2272	65.5809	54.8935	62.4975	66.124	45.1683	44.0114	42.0021	44.5812	50.1021	44.7771	48.5476	57.699	58.6318	46.6518	58.1535	55.9162
MSTRG.1345	PGSC0003DMT400081752	29.1357	31.4114	20.7714	17.7051	22.3007	20.1204	25.8126	17.6168	17.3141	13.3436	11.9783	27.5463	17.8714	19.7961	19.0293	17.5809	18.1914	20.7396	25.8238	12.1816	14.3737	14.5965	12.4405	17.1257	21.707	21.7589	19.8934	23.7632	29.2711	27.2594	18.6437	19.0633	22.5456	16.1487	18.8902	17.8592
PGSC0003DMG400032098	PGSC0003DMT400081738	0.727133	0.370382	0.879609	0.801796	0.44252	0.450721	0	0.423181	0.275384	0.39159	0.296636	1.08985	0.869838	0.724147	0.857627	0.954929	0.812918	0.64413	1.46513	0.30221	0.287673	0.528152	0.482287	0.701937	0.46407	1.0311	0.429992	0.660665	0.944284	0.564063	0.342645	0.144162	0.854076	0.289069	0.08848	0.354767
MSTRG.1351	PGSC0003DMT400081758	0	0.379148	0	0.208859	0	0	0.512483	0.699104	1.01424	1.01997	1.73857	0	0	0	0	0.353562	0.229034	0	0.106076	1.71447	1.33883	0.107807	0	0	0.160229	0.045693	0	0.262585	0	0	0	0	0.296684	0.369647	0.565165	0.576273
PGSC0003DMG400032099	PGSC0003DMT400081741	0.764041	1.23888	1.26291	1.22088	1.39539	1.71371	0.453588	1.50011	1.255	2.29665	1.89547	1.41853	0.720299	1.2792	0.908906	0.479841	0.419693	1.02928	0.950085	1.45487	1.41933	0.931082	1.31513	1.35759	0.68151	0.662738	0.956695	0.78548	1.09673	0.377724	1.4948	1.07466	0.918356	1.01497	1.31736	0.988313
MSTRG.1346	PGSC0003DMT400081770	487.531	500.086	325.656	142.914	151.3	155.919	156.055	216.836	133.591	413.743	539.88	518.715	155.029	165.356	169.214	164.025	141.486	172.367	194.5	498.341	367.562	95.1459	109.126	143.224	157.426	321.062	124.213	521.614	450.308	503.927	154.304	134.387	178.154	174.934	174.496	235.744
MSTRG.1349	PGSC0003DMT400081754	84.8161	78.6156	37.5381	30.1657	22.8342	32.9211	25.1945	25.8294	32.9458	21.8215	24.0536	79.5007	39.3748	31.7691	36.3853	43.7846	39.8467	56.9976	72.3948	19.4515	16.3881	36.0473	34.0863	25.8934	40.7305	47.0045	42.1343	59.858	68.9592	55.5883	30.978	21.8319	32.4334	26.45	26.84	26.0262
MSTRG.1352	PGSC0003DMT400081760	23.7871	20.3367	25.8475	28.5826	29.3758	27.7788	27.5084	31.5122	34.3727	32.6498	31.4648	29.8201	28.0433	24.4984	24.4186	33.6903	25.1572	33.6021	21.7517	24.2662	23.9527	26.2034	28.4691	19.0629	31.9916	40.4041	25.9699	27.5342	13.9328	13.6158	25.4472	23.4289	25.2289	27.5173	29.3996	32.5753
MSTRG.1355	PGSC0003DMT400081764	11.9568	2.22253	6.51829	0	1.87925	4.15757	12.0588	16.7521	16.1869	5.17402	5.68733	13.182	0	6.09075	0.67661	0	0	0	2.21924	3.26271	0	1.31815	9.45898	0	2.66288	12.94	14.1893	13.5882	10.0595	7.61391	14.9883	1.2779	1.77348	7.91526	14.1221	1.15261
MSTRG.1357	PGSC0003DMT400086457	1.67908	2.62464	0.902853	5.01648	4.14197	3.58549	2.15962	2.62988	1.4941	1.07655	3.93586	1.65941	2.4478	3.7027	3.02529	1.77987	1.23578	2.15651	1.15631	2.81872	0.859658	1.28825	0.958167	3.03706	3.94832	4.63765	2.06719	3.17677	1.35482	0	4.05018	3.83683	2.49028	3.10486	2.42851	3.92945
MSTRG.1360	PGSC0003DMT400033244	14.0031	14.6094	36.862	11.2775	11.6325	11.2101	11.0728	13.7064	11.4541	42.1162	49.9654	12.4316	16.6585	13.2405	11.6787	16.2968	11.1263	17.0415	11.5321	47.568	49.1503	12.8965	14.3565	9.60407	15.2348	14.6796	11.3172	13.4389	10.0488	8.98253	10.9049	12.8766	12.9294	14.4309	15.1372	12.2788
MSTRG.1359	PGSC0003DMT400033238	27.9652	25.1951	22.6439	20.1132	16.2986	22.8403	18.8477	21.0927	18.4335	22.4047	22.846	13.6304	17.8669	20.4517	19.7445	23.9003	19.4094	18.6631	20.1464	21.2916	22.6593	21.7413	23.8815	19.3746	22.8273	21.947	19.7884	21.01	23.0547	27.6263	20.6447	3.0104	23.3272	19.4003	5.90327	18.0885
MSTRG.1363	PGSC0003DMT400011124	3.64429	3.22371	4.44548	4.58666	3.29508	4.16198	3.06836	2.85733	3.96002	6.71187	6.44456	3.28162	3.72847	3.1449	3.32807	4.38276	2.82029	3.67065	2.11448	6.42636	6.41231	3.6743	4.28611	3.27943	3.12565	3.02443	3.52546	3.26621	2.20724	2.51982	4.30773	3.7018	3.58745	3.18029	3.72739	3.62439
MSTRG.1361	PGSC0003DMT400033268	244.318	266.195	318.502	268.483	240.888	252.185	385.158	324.567	392.596	309.973	311.154	254.282	236.299	263.06	261.204	277.564	247.296	295.453	254.982	291.034	299.063	286.381	307.1	250.578	238.303	346.684	231.762	202.224	207.714	249.303	237.062	255.659	278.223	270.808	324.261	287.539
PGSC0003DMG400004354	PGSC0003DMT400011129	1.11482	0	0	0	0	0	0	0	0	0	0	0	0	0	0	0	0	0	0	0	0	0	0	0	0	0	0	0	0	0.53971	0	0.402259	0	0	0	0
MSTRG.1365	PGSC0003DMT400011133	1.81326	1.80237	8.63373	5.40613	7.87661	5.60308	3.70625	3.47698	4.24493	10.5264	3.18201	1.95447	13.5227	13.6937	13.2098	10.6107	8.99916	5.77052	14.6032	5.15768	9.45118	12.9016	4.40966	3.58052	7.123	0.634748	4.65702	4.82681	7.67687	6.36593	4.01161	3.55798	4.09175	4.62378	7.76574	2.28738
MSTRG.1364	PGSC0003DMT400011126	9.6279	0	1.14916	0	0	3.40472	7.1817	0	2.54338	0	0	0	4.53514	7.54059	0.151618	6.03133	0	0	7.92297	0	0.2462	7.11332	9.93424	0	10.0418	8.43619	0	0	8.36441	0.323527	0	8.3758	0.208937	8.37638	0	0
MSTRG.1366	PGSC0003DMT400011112	11.544	7.35825	5.52058	6.1343	6.7527	10.8437	10.2697	14.5622	10.2521	16.3823	36.3902	8.91362	9.73244	8.98676	7.42832	9.23492	2.37147	8.2065	9.00514	13.1438	8.85015	9.68591	12.3105	8.08621	6.07943	8.26463	12.4972	10.1005	5.72448	1.03014	12.5675	7.17717	12.5497	7.66695	9.3913	16.8534
MSTRG.1367	PGSC0003DMT400011145	1.24359	0.437713	1.48765	1.59821	1.06365	0.936038	0.435397	0.53106	0.382192	0.695918	0.727575	1.76267	0.736313	1.51856	1.21141	1.99919	0.238166	1.11777	0.326055	0.364776	0.405363	0.647138	0.615064	0.755736	0.848675	2.08903	0.753611	1.16633	0.379658	0.090692	1.26222	1.02805	1.3229	0.4068	0.548553	0.979394
MSTRG.1369	PGSC0003DMT400011115	39.2447	37.0036	114.116	39.9726	44.6378	48.2388	34.2117	49.3428	45.2686	177.365	142.554	42.9901	37.2356	33.6139	38.5806	38.9314	26.5877	36.3478	31.8766	150.099	167.187	34.1001	45.5336	40.053	29.5216	44.8736	33.2981	37.7894	24.3977	26.7182	39.1559	40.31	44.0094	39.7418	43.3342	52.6409
MSTRG.1371	PGSC0003DMT400011139	5.20075	2.19134	3.44876	96.7795	89.926	220.509	68.4162	96.9995	99.2498	2.30134	3.17563	2.43271	43.6582	89.639	156.538	33.8617	17.4875	28.9372	2.21828	1.07165	1.32252	73.2775	159.586	300.094	26.2749	72.2955	10.2118	3.00947	0	1.36568	236.412	192.534	128.89	26.4709	88.4173	65.5578
MSTRG.1372	PGSC0003DMT400011141	3.77609	10.9126	6.92893	9.70001	3.68968	7.74378	16.3488	25.2459	32.5424	1.32152	5.05637	6.24305	1.15565	4.88737	5.13083	4.24005	3.55845	4.52717	7.11016	3.79198	4.75773	5.25354	7.70518	2.09907	5.36222	8.02347	6.76045	2.34056	0	7.45728	4.88593	4.81606	8.56941	12.6983	18.637	11.7395
MSTRG.1375	PGSC0003DMT400011143	3.52125	4.50989	5.17125	3.86264	4.55566	4.37181	5.00452	4.23234	3.19745	4.09996	3.01198	3.50133	4.43243	4.48814	4.19207	4.95994	2.88809	4.35725	3.90581	3.48135	4.06909	4.65431	4.44608	6.02104	3.88989	3.75904	3.74087	3.64179	3.30635	2.97941	4.9964	5.39092	3.8231	3.67961	3.92315	3.191
MSTRG.1376	PGSC0003DMT400011144	10.9966	9.06649	13.8353	12.5621	13.7072	13.3115	13.4151	11.0519	14.7297	11.0166	15.7313	7.93447	8.40002	10.5321	7.07836	8.11353	7.33558	9.54469	7.27485	10.4803	13.0932	12.3157	9.71844	7.37123	9.89476	10.8702	6.88682	7.74819	8.14339	9.56056	11.292	10.7895	8.88876	10.7352	11.6757	10.1414
MSTRG.1370	PGSC0003DMT400011138	31.5997	32.589	50.1531	13.077	39.0273	39.3772	32.8227	38.2148	14.5276	3.29834	55.3306	39.19	10.4912	39.6246	17.9035	52.2312	19.7914	51.6682	18.9321	1.83194	42.7812	28.4942	44.6249	0	48.2856	17.1597	20.3666	0.561016	0	0	20.3483	15.244	8.38408	27.3993	12.1524	19.4127
MSTRG.1377	PGSC0003DMT400083201	1.94479	0	14.5389	4.01353	5.36877	24.4097	0	0	6.9892	0	8.21634	0	20.7024	2.76747	6.1446	1.99307	0	2.3791	1.53209	0	0	3.56964	0	4.12833	2.61063	7.35758	0	5.03425	1.49879	2.02396	0	5.75471	6.14572	1.47733	2.71944	7.34718
MSTRG.1380	PGSC0003DMT400083203	2.3176	3.00676	1.04905	1.71567	1.16203	2.66022	0.375578	0.943609	1.32449	0.98292	0.241659	2.90877	0.918022	1.70036	0.824328	1.93977	1.97645	4.98456	1.63133	0.832953	0.657266	1.25092	0.529604	2.36806	2.08895	3.49441	3.19298	4.11306	5.18541	1.82734	2.16967	1.84095	1.73696	1.66947	1.17157	2.51543
MSTRG.1379	PGSC0003DMT400083202	6.89259	6.30609	17.1605	25.1007	28.2738	23.9475	27.1063	25.8087	28.773	19.8824	22.7176	7.66152	15.5889	22.766	22.4345	15.9687	14.097	14.8374	11.0658	17.7604	18.8891	19.1877	22.2246	32.9759	13.9348	15.4691	12.0087	8.74891	12.0356	8.98764	27.7266	30.7505	23.4248	19.4485	26.3566	27.4844
MSTRG.1383	PGSC0003DMT400083191	14.4861	15.9823	0	0	0	11.7608	9.29501	0	0	12.06	13.9383	15.2799	0	11.5886	8.64409	10.1851	0	0	0	18.2255	16.4187	10.5416	0	8.85502	13.1636	7.53362	0	12.6132	15.0638	12.2137	11.3082	11.308	9.85528	10.1332	9.96704	10.5814
MSTRG.1386	PGSC0003DMT400083194	3.17704	5.65831	1.0907	10.3396	11.3519	11.2453	10.5667	10.1634	7.45979	2.22281	2.57011	2.90706	8.62735	7.70031	12.2632	12.701	6.0671	12.3504	3.47753	2.04728	1.53296	7.54219	11.1733	9.57326	11.7201	9.07661	8.75686	6.92627	1.95843	1.94741	11.5073	12.136	7.87398	8.42001	11.252	9.15026
MSTRG.1387	PGSC0003DMT400083205	3.23263	2.22826	3.06923	1.61797	1.3703	2.22064	3.00728	1.38729	2.36366	1.60024	2.00098	2.47157	2.58647	2.90539	2.15817	2.78604	2.02489	2.38726	5.13159	2.66845	2.68226	2.92156	3.46515	3.48046	2.97613	1.93722	2.52323	1.99816	2.81198	3.44349	2.27465	1.39185	2.34983	2.44882	2.70499	2.28455
MSTRG.1392	PGSC0003DMT400023183	7.71574	5.25072	37.5327	75.5627	48.8523	74.4879	79.0657	75.5232	53.1543	82.2501	89.9357	11.0299	232.781	242.473	288.537	268.283	101.86	111.373	13.1713	61.8155	54.2784	197.171	171.724	131.389	128.494	292.476	48.7958	6.50492	5.79203	7.29044	76.4337	41.4021	63.4722	23.8569	64.0818	48.4693
MSTRG.1391	PGSC0003DMT400083215	24.1916	25.3258	55.3479	17.3065	11.1697	16.2286	13.7587	12.0621	11.3742	44.1825	60.7441	31.4039	32.3861	22.8866	24.1229	15.4534	11.601	14.4819	19.036	47.3326	43.7552	29.7771	25.5619	19.4027	18.458	14.8357	16.8306	18.6375	18.6976	23.2637	16.8697	11.9792	16.1554	10.0592	5.55494	9.28639
MSTRG.1394	PGSC0003DMT400095550	0	0	0	0	0.0801	0	0.949312	0.234499	0.156534	0.249982	0	0.171152	2.83358	2.25603	4.71083	0.817182	0.181156	0.216818	0	0.195098	0.132037	2.69611	1.94697	0.612436	0.19941	2.02278	0	0.3222	0	0	0.292967	0.138277	0.268631	0.219966	0.302056	0
MSTRG.1397	PGSC0003DMT400092749	0	0.134167	0.206472	0.495278	0.157187	0.094948	3.31677	1.11336	0.198914	0.543436	0.199835	0.168033	18.9175	11.2991	27.1803	3.34427	0.553296	0.285661	0	0.165521	0.284166	11.0889	11.9987	5.96824	0.732269	16.1083	0.231492	0	0.075466	0.060498	0.873807	0.170741	1.28715	0.035578	0.290765	0.121442
MSTRG.1396	PGSC0003DMT400094021	0.050269	0.252916	0.241748	0.253707	0.288134	0.30505	2.08501	1.27851	0.800092	0.311779	0.630508	0.192806	6.16643	3.92393	8.71161	1.21591	0.61033	0.604052	0.026294	0.908331	0.353741	4.15393	3.25306	1.51747	0.742285	4.34175	0.440726	0.387661	0.154629	0.481953	0.549134	0.309444	0.820281	0.435945	0.357466	0.467015
MSTRG.1393	PGSC0003DMT400023190	0.800189	0.873365	1.95056	0.889684	0.790546	1.15712	1.40528	2.74472	2.70504	2.11202	3.01846	0.533	5.54089	2.47903	5.0073	3.33437	4.39775	2.0634	0.454832	2.58151	1.28115	3.62057	3.58595	2.4387	3.38325	5.25404	2.6555	0.640554	0.601566	0.768431	0.873962	0.811729	1.39347	2.803	3.59301	2.37495
MSTRG.1398	PGSC0003DMT400023192	11.837	20.3218	56.7882	69.0783	77.8544	40.3251	14.1002	17.1794	9.79779	62.4489	47.9623	19.0527	84.3114	104.683	44.7229	54.0978	40.3324	25.6943	14.0577	45.8008	45.1361	61.836	48.4472	65.9085	36.4227	13.3366	57.616	30.5649	34.4096	37.7835	61.5224	92.6753	53.5967	37.9768	27.8701	16.8602
MSTRG.1399	PGSC0003DMT400023193	0.680518	1.55415	8.45588	11.5814	10.7342	10.7956	151.298	71.0762	17.0146	14.1102	15.7271	2.26734	146.14	96.7432	262.462	38.0063	13.4689	11.2272	0	17.6556	17.4444	139.978	248.716	116.096	20.729	271.806	6.92026	2.16589	1.73117	1.93236	20.0911	14.8469	28.1139	9.1157	22.4714	5.68367
MSTRG.1404	PGSC0003DMT400023208	1244.16	1219.45	574.897	2553.2	2052.54	2410.04	2991.38	1957.03	2401.1	179.297	175.734	1160.45	2056.15	2568.03	1842.41	2381.63	2778.79	2874.97	1009.91	180.794	164.999	2189.05	1861.93	1992.94	1931.28	3990.31	1541.4	1007.26	1182.04	1019.66	3064.41	2625.36	3158.04	1582.96	2271.01	1974.48
MSTRG.1405	PGSC0003DMT400023211	17.0535	3.22608	8.1316	8.10647	5.4247	5.52259	6.13402	6.95071	7.66144	3.54259	9.1429	11.9354	7.46705	3.70959	6.68157	11.515	7.44026	9.91481	5.4568	6.51277	5.67023	7.40599	5.08154	3.57782	7.2877	11.3789	7.80844	9.03021	3.69588	0.8485	4.8415	6.00677	3.81679	8.00111	3.42856	6.12152
MSTRG.1406	PGSC0003DMT400023297	6.15239	0.50788	23.4284	0.081797	0.26004	0.068038	0	8.5395	5.72775	0.291532	6.21574	6.99499	5.11373	4.63036	5.32566	0	0.109401	0.569587	7.13641	11.1156	3.36888	4.82269	0.338426	1.77212	0.381365	5.94215	0	2.68717	4.9721	13.2862	2.64946	0.191899	10.3124	0	0	2.72107
MSTRG.1409	PGSC0003DMT400023223	3.13269	5.86636	31.9	18.8774	124.726	23.3537	132.934	22.6645	43.4261	15.8062	2.16424	29.5784	113.734	162.798	112.464	25.6071	17.9034	86.4984	8.19442	5.85376	9.7935	20.9661	128.195	132.28	14.0479	57.7443	96.871	36.2844	11.0587	58.774	12.2088	24.5893	20.5006	13.1326	126.711	11.2898
MSTRG.1410	PGSC0003DMT400023302	1.95045	2.41624	31.567	29.432	5.63215	32.6752	15.077	50.2874	25.158	37.0826	22.7409	4.81094	14.5704	21.2311	19.3307	18.2593	19.3211	22.1117	7.95194	47.1193	4.46934	16.1166	27.6167	19.6347	18.367	1.12072	15.152	2.26132	2.71396	4.88091	23.4079	21.2415	16.3016	27.1416	35.7903	44.6859
MSTRG.1408	PGSC0003DMT400023216	57.3504	54.6924	0	46.7659	51.46	49.3384	46.7683	42.4757	51.1454	56.713	55.8732	50.6681	50.8516	48.1631	41.4729	44.9579	38.4701	54.4172	51.664	12.6117	44.1158	59.422	53.2231	44.8107	42.2982	56.6315	37.2559	44.0902	42.3031	35.7473	52.8258	49.0417	56.5866	34.2453	53.112	43.485
MSTRG.1411	PGSC0003DMT400023224	0	1.29117	0.572831	0	0	0	0.985607	0	0	0.436376	0	1.44518	0.29493	0.744741	1.1036	0.881568	0.570192	1.48128	0	0	0.484697	1.30727	1.40746	0.873514	1.45935	1.55719	0.838363	1.4795	0.922079	0.673174	1.3839	0.799951	0.774412	0.631917	1.07013	0
MSTRG.1412	PGSC0003DMT400023304	0.210976	0.730499	1.11861	0.18243	0.236266	0.219574	0	0.059242	0	0.863747	0.600324	0.612077	0	0.455524	0.379737	0.133097	0.220128	0.179744	1.57828	0.396102	0.599168	0.269922	0.24767	0.238583	0.189729	0.295026	0.83508	0.383619	1.34161	0.630229	0.124341	0.200926	0.216923	0.29566	0.155434	0.041491
MSTRG.1414	PGSC0003DMT400023233	0.63066	0.935384	0	0	6.22271	0	8.53705	29.4302	19.36	0	0	0	0	0	8.19439	8.22129	6.14929	12.8011	0	22.7855	37.1672	8.62697	14.9759	3.06097	0	2.4824	10.2914	0	0	0	3.81633	12.9184	7.33692	2.2591	16.4704	20.9732
MSTRG.1413	PGSC0003DMT400094865	3.28039	0.55257	0.508958	1.20662	0.836375	0.691499	1.34881	0.547761	0.379682	0.972593	1.771	0.878445	0.590559	0.511108	0.341576	0.728067	0.599695	0.594755	0.489696	0.821936	0.304018	0.21886	0.495118	0.591125	0.53555	0.398679	0.27209	0.756277	0.797335	0.205465	0.284189	2.11161	0.327792	0.507621	0.44989	0.643921
MSTRG.1413	PGSC0003DMT400023235	0	4.84324	41.8914	17.7224	14.3168	20.4293	26.3229	30.9425	32.8779	55.7825	39.9528	4.73458	13.6943	17.2451	17.3392	13.4734	12.7536	12.7246	4.75263	41.698	48.8327	15.0306	21.7458	16.7935	11.43	18.5941	9.51264	3.14707	6.06489	6.58801	17.5686	1.93353	19.2235	18.4834	24.0512	30.0311
MSTRG.1415	PGSC0003DMT400023307	18.9928	19.0953	15.5894	26.5839	25.5921	24.3044	19.0465	21.0447	27.6703	8.4966	10.3189	15.9979	20.6525	23.2156	24.4947	20.3908	20.9816	27.9961	17.2701	9.02731	10.5766	27.8006	29.7523	22.6405	22.1034	30.5272	17.691	16.4384	16.5207	20.0774	27.1286	29.3346	32.112	24.7935	24.3182	18.8475
MSTRG.1418	PGSC0003DMT400023237	17.3717	17.0234	18.5356	21.7328	21.1134	20.2475	23.2596	25.2552	25.0752	15.8732	17.5123	17.7922	9.31711	20.5243	20.4003	21.2944	17.3855	21.9597	19.2794	14.174	16.536	19.1098	22.9062	17.05	22.4095	25.8256	19.2345	17.7226	14.8918	10.7107	19.538	19.5221	22.2269	21.5136	24.1185	24.9215
MSTRG.1423	PGSC0003DMT400023310	25.8472	12.1349	29.8241	29.898	24.6867	26.4373	0.228263	31.7634	33.3479	21.4315	36.0682	13.2998	16.9634	17.447	0.214875	30.3571	0	27.45	26.2307	38.8159	20.7372	32.6453	0.409304	26.3893	22.042	11.5595	26.501	0.103982	17.438	15.9073	23.5841	30.7946	24.0406	31.442	25.8368	26.1357
MSTRG.1424	PGSC0003DMT400023246	21.4247	25.1706	9.28361	0	0	0.685906	0.167502	0.867208	1.41504	16.6151	18.8263	22.5399	1.84022	2.64519	1.04066	2.60221	0.142209	0.401494	0	19.5665	14.2682	1.34624	1.60323	0.683553	1.10786	0.20947	0.175603	14.5842	15.8762	23.4009	0.354344	0.521875	0.065259	0.531663	0.626764	1.36266
MSTRG.1419	PGSC0003DMT400023239	1.22414	0	0	0.00254	0	0.070765	0	0	0	0	0.113522	0.551358	0.775367	0	0	0.563145	0	1.47701	0	0	0.042381	0.177424	0	5.99449	0	0	5.62342	1.69465	0.198683	0.48753	0.035349	0	0.346903	0.278443	0	1.46567
MSTRG.1421	PGSC0003DMT400023242	8.54994	0	0	0	0	0	0	0	0	0	0	0	0	0	0	0	0	0	0	0	0	0	0	0	0	0	0	0	0	7.18131	9.94898	0	0	0	7.99401	7.42054
MSTRG.1428	PGSC0003DMT400023247	10.3048	9.89341	4.55565	4.25885	4.42215	4.23121	2.53089	3.21063	4.26227	4.44551	3.6614	7.1515	5.7103	3.81552	4.61618	6.02754	6.18673	4.44694	10.1454	4.89072	4.98945	5.14396	4.03909	3.58882	3.1423	6.44616	4.89056	5.79512	7.41029	6.86657	4.36399	5.20358	4.90883	4.77615	3.28076	3.56546
MSTRG.1426	PGSC0003DMT400087791	0	15.2697	0	0	0.263995	0.377736	0	1.01404	0	0	0	0	0	0	0	0	0	0	0.38034	0.60849	0.362594	0.549777	0.716743	0	0	0.190724	0.95933	7.9526	5.09254	4.94865	0	0	0	0	0	1.00011
MSTRG.1430	PGSC0003DMT400023322	0	0.35032	17.2865	0	0	0	0	0	0.382622	5.37055	0.651973	0	0	0.597458	0.383998	0	0	0	17.4102	2.40236	3.39393	0.135928	0.649263	4.27874	0.159359	0	0.430072	2.0979	51.0287	29.3646	0.823021	0.212306	0	2.68527	0.703797	2.5109
MSTRG.1436	PGSC0003DMT400023249	8.01083	15.413	85.493	57.0073	57.1992	54.369	72.2711	55.1266	72.8454	158.108	152.514	10.447	36.2673	45.7298	49.3305	19.3925	17.0736	13.6355	12.6707	137.635	131.172	42.5025	60.3829	61.3656	18.3821	22.1648	17.4507	11.5841	14.238	10.1895	50.8578	57.1239	41.8885	46.7096	49.0271	76.1146
MSTRG.1437	PGSC0003DMT400023251	7.87871	6.03215	29.6506	8.61523	9.90478	7.72481	6.03175	9.28531	7.48717	64.05	63.2887	11.4799	5.49674	6.92797	5.78812	5.21694	3.5092	3.65339	3.24577	38.3697	35.7944	5.66546	7.53757	5.07053	4.58374	7.63213	3.68793	10.1752	6.50598	5.29683	6.96379	5.74237	3.93412	7.26571	9.83078	9.23618
MSTRG.1442	PGSC0003DMT400023326	0.424216	0.142766	1.4464	0.384288	0.563386	1.25449	0	3.48797	2.18661	1.05245	0.857926	0.638581	0.411153	0.238366	0.342813	3.62972	2.24421	1.62372	0.96723	0.970517	0.616649	0.178961	0.383194	0.364151	1.4021	0.340087	0.853169	0.137515	0.334593	0.478522	0	0.635472	0.828019	2.26871	1.54314	3.59767
MSTRG.1440	PGSC0003DMT400023324	3.18065	1.8265	1.60643	5.0026	5.71808	4.98201	2.60717	2.10654	2.26255	1.74739	2.53747	2.58231	2.66198	6.72095	3.89694	3.95618	4.95189	4.52649	2.43117	1.00343	1.67021	3.51586	2.60381	4.96399	4.17444	5.11238	3.60152	4.24541	3.13031	2.59099	4.05393	4.84144	3.02228	3.1537	2.98738	2.89619
MSTRG.1438	PGSC0003DMT400023323	144.777	148.774	162.034	206.553	197.832	179.438	222.59	179.437	234.891	120.017	137.965	143.655	194.387	234.039	203.521	176.062	159.305	175.695	145.095	130.009	131.044	231.49	231.68	237.55	155.451	165.86	137.431	121.239	148.479	157.804	196.622	216.45	206.915	166.522	203.082	157.182
MSTRG.1444	PGSC0003DMT400023254	2.97991	6.25923	1.80032	0	0.935563	2.47509	0	0	3.87289	4.57234	9.8315	4.92676	2.31137	5.14473	4.96697	7.35259	3.59	9.59138	1.63046	5.15974	2.87718	5.71248	2.77462	0	4.42418	1.81511	8.51417	6.89917	4.4171	5.5274	0	0.730977	1.64199	5.92037	3.10576	3.42328
MSTRG.1443	PGSC0003DMT400023327	120.042	119.619	298.978	325.163	367.938	264.851	240.371	270.416	313.089	267.227	221.155	118.01	335.155	347.708	262.151	276.711	261.727	244.813	198.777	228.064	294.991	373.4	320.957	301.642	272.96	214.865	264.51	177.11	239.642	295.395	267.635	324.088	303.111	271.497	286.568	257.842
MSTRG.1449	PGSC0003DMT400023333	0	0	0.910154	19.6057	20.6988	15.154	12.3976	15.7257	15.312	0.853378	0.507376	0.43801	10.5527	12.9955	12.5607	5.71155	6.42674	4.72002	0.076994	1.18974	2.25694	10.7823	12.1741	23.8226	5.62822	6.08965	4.17546	0.194258	0.094531	0.349102	18.4498	23.1085	10.0895	8.77448	16.494	17.9722
MSTRG.1452	PGSC0003DMT400088166	96.029	100.497	160.31	145.031	115.082	131.16	125.309	134.341	93.5605	143.288	144.395	146.7	119.928	99.5659	87.3338	92.1827	80.0358	106.179	88.5067	183.057	145.788	68.9911	62.3785	78.6224	79.0094	177.26	73.3467	85.5836	83.3215	124.403	123.892	90.1631	127.321	80.2778	88.0402	122.086
MSTRG.1453	PGSC0003DMT400023336	35.766	36.1902	321.589	3.75438	1.20236	7.15005	0.383071	0.350106	1.22992	165.072	75.3208	62.9143	8.57387	5.54776	4.03446	2.26925	3.84239	0.490468	347.404	113.5	229.572	2.1844	2.90404	2.7478	1.60157	1.10626	2.25226	115.755	340.91	318.467	0.874802	0.189931	2.99877	0.639579	0.249615	0.500426
MSTRG.1457	PGSC0003DMT400023263	1.82729	2.5871	18.4058	109.277	121.845	53.7181	14.627	11.1569	15.9466	15.1816	11.7082	2.17559	64.4725	114.848	20.8532	53.0405	41.1137	22.9545	15.526	12.3311	28.1232	47.5014	18.5925	88.9971	37.1667	5.35691	53.2578	9.68801	23.0815	19.9439	65.0795	119.366	46.5895	21.3368	31.509	13.622
MSTRG.1456	PGSC0003DMT400023338	153.981	132.956	155.014	193.262	185.81	189.3	287.257	246.847	277.474	145.552	126.783	152.971	207.493	216.186	221.409	236.836	219.693	271.983	202.578	165.362	164.508	244.949	248.57	193.92	187.604	225.553	203.218	137.283	179.843	230.777	173.344	198.599	227.72	179.545	264.831	206.509
MSTRG.1458	PGSC0003DMT400023264	9.02293	6.97081	1.72491	7.58934	4.15219	6.17918	5.99724	5.21861	6.93454	0.57886	3.00805	7.20566	6.2587	6.18868	6.38698	6.95141	6.80404	5.38931	4.06919	2.01068	1.1929	5.69499	7.21364	2.45897	6.30858	6.2126	6.30322	4.07223	3.59517	2.19759	4.8798	7.09624	4.69573	7.89454	6.08665	4.21554
MSTRG.1460	PGSC0003DMT400088400	0.863344	0.578965	0.270329	0.606388	0.380292	0.46499	0.16092	0.57064	0.475286	2.05308	1.55836	1.50307	0.162193	0.139377	0.235454	0.32051	0.136621	0.936321	0.673339	0.529382	0.512409	0.676043	0.944241	0.352975	0.284738	1.03974	0.590464	1.35077	1.16893	0.169301	0.712033	0.708312	0.589336	0.297205	0.254281	0.203913
MSTRG.1461	PGSC0003DMT400023345	0	0	0	0	1.78662	0	0	0	0.83484	0	0	0	0	0	0	0	0	0	0	0	0	0	0	0	0	0.946372	1.16755	1.16578	0	0	0	0	0	0	0	0
MSTRG.1461	PGSC0003DMT400023346	1.35864	0.659082	0.657568	0.885545	0.50034	0.91043	0.599851	1.19219	0.92491	0.726878	0.486083	1.19638	0.854789	0.810706	1.49922	1.22987	0.794149	1.78691	1.07817	0.713772	0.606831	1.3804	1.59899	0.984952	1.60418	0.973011	0.539305	1.12502	1.17328	0.536066	1.0717	0.621806	0.734304	2.20314	0.700357	1.04311
MSTRG.1462	PGSC0003DMT400023272	25.1785	23.6293	28.8797	31.1424	27.4011	32.8271	17.3221	34.8989	22.9066	7.9573	12.3081	22.8767	53.3725	30.0991	25.2004	36.5199	29.0929	33.9173	25.6185	12.4046	11.8498	37.8932	19.4083	21.7873	29.7128	22.0535	24.0899	27.1903	20.6657	23.1341	31.81	33.1891	37.5007	38.643	24.9194	32.432
MSTRG.1459	PGSC0003DMT400023342	0	0	0	0	0	0	0	0	0	0	0	0	0	0	0	0	0	0	1.63668	0	0	0	0	0	0	0	0	0	0	3e-06	0	0	0	1.12065	0	0
MSTRG.1464	PGSC0003DMT400023349	16.6993	16.6607	14.315	29.9959	26.3172	25.0566	21.9748	23.6415	23.9754	17.4073	17.4404	18.7913	21.2043	22.6927	18.3588	25.3442	16.0029	22.1432	14.7128	12.8432	12.7886	17.8991	18.3452	18.4097	19.9668	18.3455	20.0448	16.8536	11.7394	7.97509	25.969	26.619	20.9035	21.317	25.9093	23.8264
MSTRG.1463	PGSC0003DMT400023348	84.6139	72.3733	28.8684	28.1132	22.9371	30.7775	24.3199	25.2943	33.2672	16.9149	13.9522	69.3565	41.4062	24.6439	34.3853	55.2083	43.8609	59.7123	68.8535	17.3909	14.8838	42.0067	43.2536	22.8361	51.9551	65.803	48.0932	66.8466	55.6797	24.7292	24.3291	19.374	36.671	34.2728	26.4775	33.8333
MSTRG.1466	PGSC0003DMT400023277	16.7051	16.5132	20.3046	25.1378	3.13531	29.0822	4.72072	29.2461	1.94275	11.7299	27.3625	25.4997	2.03285	13.8504	14.0321	21.3818	7.57602	13.2988	19.7483	12.88	1.34263	15.1274	18.1211	3.09343	16.2567	16.3672	10.2078	20.3913	14.4695	7.92061	18.8716	27.8179	9.78659	15.2869	15.2865	28.0612
MSTRG.1473	PGSC0003DMT400023282	0.577745	0.960001	0.802974	0.466541	0.397654	0.622491	0.533001	0.764478	1.27522	1.6381	1.14782	0.452236	0	0.255783	1.25101	1.51039	0.351345	2.32896	0.241758	0.875049	0.849733	1.28817	1.72972	0.438778	1.11311	1.66004	1.13573	0.578479	0.354012	0.567595	0.835108	0.283161	0.747908	1.84698	1.45712	0.954065
MSTRG.1471	PGSC0003DMT400023354	0	2.5879	5.27899	5.82284	0.866608	3.66105	7.6013	6.71548	7.71621	1.53049	3.75476	2.76714	5.90554	2.45568	6.11634	2.7032	1.12143	5.06221	3.24104	5.10091	5.20187	7.66678	1.14098	5.00804	5.44641	4.77397	4.3411	2.51242	5.02691	0.092892	1.77785	9.20025	4.32207	5.85237	7.7246	4.40204
MSTRG.1472	PGSC0003DMT400023280	1.53087	1.17276	27.4318	1.04165	0.325174	2.76564	0.745515	1.52998	2.20475	74.3111	89.697	9.79356	1.94789	4.03009	6.45089	7.47096	16.6354	11.9172	12.1231	30.7625	16.4522	1.95104	6.37274	1.10217	5.47273	3.46216	21.2819	3.87747	3.63957	6.17294	1.63847	0.81931	2.52465	4.82765	5.55882	3.72211
MSTRG.1467	PGSC0003DMT400023279	0	0	8.0653	5.17513	4.83495	7.79284	3.57869	5.22729	4.44827	9.29736	5.60211	5.41445	0	5.85116	5.90211	3.86672	3.81351	3.377	6.8354	7.49024	6.90024	4.47525	5.96146	8.1194	4.92633	3.2501	0	5.2499	5.95319	0	6.94249	0	3.88313	0	0	5.1572
MSTRG.1474	PGSC0003DMT400023368	12.1504	20.3999	301.375	67.1023	62.9909	75.0686	103.088	84.9185	85.8324	544.753	457.353	18.0433	41.4157	32.8393	51.9845	49.0657	44.9722	53.9279	18.4821	440.746	482.494	45.6137	84.3559	48.415	45.9451	35.7792	58.2491	13.8758	14.3788	17.868	63.1417	67.7067	58.5398	79.3979	86.3285	64.2561
MSTRG.1476	PGSC0003DMT400023374	0.157348	0.756009	0	0	0.090553	0	0.491737	0.947481	0.495017	0	0	0	0	0	0.107002	1.30848	0.379727	1.81908	0.07777	0	0.029854	0	0.052943	0.075252	0.774483	0	0.657771	0	0.064535	0	0	0	0	0	0.680539	0.124622
MSTRG.1478	PGSC0003DMT400023286	27.4815	24.1551	32.0897	31.0721	35.1279	35.3106	30.1418	24.5492	31.2183	22.4949	13.4357	23.9002	28.8061	35.7919	33.4069	33.2217	28.5473	25.1776	32.4468	20.9865	25.8634	37.3349	33.8078	32.9836	31.2602	25.6274	28.8111	29.5963	36.0511	31.4178	33.3348	35.244	37.2944	26.0456	28.5426	24.5232
MSTRG.1477	PGSC0003DMT400023378	40.3697	34.3453	28.5767	22.5226	23.1078	24.7755	21.4241	22.7549	19.509	26.4581	24.8788	28.8124	19.1049	18.0659	16.5578	20.1402	16.0589	19.2687	29.3977	16.9614	15.3447	20.3712	22.9449	24.1355	22.8973	23.2518	23.3964	27.1536	19.4244	15.3129	25.4416	25.2595	23.5157	22.8078	21.7177	25.2891
MSTRG.1475	PGSC0003DMT400023284	343.732	105.06	97.751	101.189	96.5937	43.8728	63.0937	110.572	112.687	74.3197	214.76	80.0555	71.4788	76.7882	56.0748	121.614	41.2367	148.491	334.802	74.0641	81.5374	157.245	79.2528	60.7519	46.2225	69.091	72.5577	132.993	182.212	53.8026	29.7633	78.2898	53.0409	87.2633	36.84	126.481
PGSC0003DMG400045929	PGSC0003DMT400096358	0	0	0	0	0	0	0	0	0	0	0	0	2.66255	0.828479	0	0	0	0	0.624745	0	0.594486	0	0	0	0	0	0.988031	0	0	0.894398	0	0	0	0	0	0
MSTRG.1481	PGSC0003DMT400023289	0.691473	13.4296	4.6409	3.29954	1.0666	0.72291	1.03056	4.95259	3.6475	17.9867	19.1405	3.67914	5.0757	0.96804	5.19811	3.99556	1.79822	3.89218	0	18.9866	22.1367	2.87883	5.27939	0.786692	2.62215	5.49571	1.99642	0	0.170972	1.20017	1.5043	0.253285	2.32064	1.73961	3.84618	3.52424
MSTRG.1482	PGSC0003DMT400013377	0	0	0.906155	0.702171	0	0.799774	0.68626	0	1.33028	0.711901	0.542123	0.70632	0.937	1.16804	1.24748	0.698975	2.07082	0	0.997373	1.76525	1.20283	1.3133	0	1.8709	0.615033	0.810095	0.370901	0.673561	0	1.07753	1.04813	1.09855	1.15875	0	1.23318	1.73546
MSTRG.1486	PGSC0003DMT400013373	0	0	0	0	0	0	0	0	0	0	0	0	0	0	0.194507	0	0	1.73016	0	0	0	1.3221	0	0	1.14332	0	0	0	0	0	2.20867	0	0.137407	0	0	0
MSTRG.1480	PGSC0003DMT400023388	0.258675	1.62766	0	0.383979	0	0	1.37666	0	0.367056	0	0	0.521088	0.704561	0	0.36127	0	0	0.403073	0.397951	0.523779	0.088774	0.250344	0	0	1.32015	0.859306	0.530933	1.18786	0.369763	0	0.711022	0.357965	0	0.01655	0	0.415776
MSTRG.1479	PGSC0003DMT400023383	22.645	29.2206	14.4382	13.2623	12.0691	15.3229	15.1707	10.7497	13.0569	12.2096	7.55747	23.095	9.20895	13.0712	11.9715	16.4894	8.35153	14.3575	16.6731	11.9982	9.70445	14.0031	13.2177	10.2484	14.9862	10.7754	10.6627	16.6793	11.6459	3.6513	14.7472	1.82719	13.0746	11.2555	10.9168	8.74764
PGSC0003DMG400005214	PGSC0003DMT400013372	0	0.723118	0	0	0	0	0	0	0	0	0	0.147555	0	0	0.26381	0	0	0.290905	0	0	0.0701	1.07183	0.123302	0	0.60579	0.056793	0	0	0.061852	0	0.564272	0.049275	0.072345	0.174961	0	0
MSTRG.1485	PGSC0003DMT400013376	0.692719	2.39352	6.57744	0	0.452452	0.154491	0	0	0	0.618966	1.64893	1.74395	0.281027	0.271977	0.4761	0	0	2.23135	10.1329	2.7697	4.2761	1.17086	0.342397	0	1.8296	0.312018	0.294268	5.98476	5.0469	1.91267	0.305705	0	0	0.258771	0	0.345655
MSTRG.1490	PGSC0003DMT400013381	8.19374	9.27721	4.45987	40.5883	41.9068	36.8092	43.177	72.5839	45.8093	2.35161	3.32236	7.02819	25.638	39.1257	48.6036	41.1161	42.1106	50.3561	8.08915	2.40054	1.54972	15.4765	20.9846	28.4134	22.1048	21.1226	37.9635	3.55005	3.10324	4.0068	23.0895	30.557	29.4324	28.9677	51.9882	54.8645
MSTRG.1495	PGSC0003DMT400013370	3.16122	0.032083	19.8116	0	4.37086	8.18259	1.15425	3.85106	4.40582	0.076888	0.6371	0.100243	2.70831	2.44496	0.882758	0	0	0.101922	4.94311	18.3616	13.8789	0.689056	2.58293	9.89448	2.97108	11.5091	6.4744	5.1208	2.32091	1.50559	8.40957	0.099863	5.71948	6.89102	1.51587	7.05292
MSTRG.1498	PGSC0003DMT400013327	7.8293	7.09161	6.10751	10.3001	2.99637	5.30195	3.73147	1.89883	3.80011	7.29876	6.7301	3.81239	7.19713	6.38653	6.16552	6.57691	8.4701	4.16299	10.8243	2.57827	3.69507	8.0346	4.30778	3.21877	9.24943	2.36284	3.80851	4.20818	6.711	6.7758	3.60202	7.98493	8.41442	3.53755	5.14234	4.24611
MSTRG.1500	PGSC0003DMT400013321	529.779	460.087	608.172	757.99	726.792	793.053	827.515	771.42	745.509	623.279	646.688	501.761	689.017	669.766	846.912	610.882	607.972	724.729	697.916	613.946	657.985	623.834	539.891	903.325	545.057	551.235	696.833	545.515	599.61	595.761	752.13	783.065	751.379	565.632	776.025	754.221
MSTRG.1501	PGSC0003DMT400013363	9.50521	3.78565	0	7.74918	5.86329	6.55075	0	0	11.654	4.25411	6.2184	2.40382	4.78487	11.1295	5.12853	7.00956	2.04134	6.88235	0	0	0	10.8657	7.65246	11.0591	0	3.60662	11.3526	5.39991	0	0	6.24469	7.41974	6.74257	0.831927	4.44423	11.0613
MSTRG.1502	PGSC0003DMT400013320	38.4289	33.8814	33.8734	41.409	36.7906	39.6141	54.3046	44.6468	55.668	25.2943	28.1535	35.8342	56.6925	47.8793	51.8014	47.8519	43.1877	50.5569	36.9519	28.7146	32.5594	51.4454	52.9067	38.0803	44.7755	50.212	35.9521	33.3479	42.9927	55.0771	40.0473	41.4087	56.4782	46.0026	51.3247	51.2259
MSTRG.1506	PGSC0003DMT400013318	21.2079	16.8381	16.2328	17.1481	21.904	14.1369	19.9109	18.2438	19.4334	14.241	12.5775	20.7952	31.0599	27.5607	30.1101	27.6603	20.2876	27.8987	22.3047	11.2685	14.5963	41.7124	46.1562	33.7421	24.6626	19.5041	28.845	19.6749	21.5834	15.1562	24.4986	22.97	19.6694	30.8862	20.983	25.1767
MSTRG.1512	PGSC0003DMT400013313	0.865747	0.612587	2.15656	0.361624	0	0	0.65186	0	0.303308	1.89928	1.69738	0.784806	0	0.20851	0.10776	0.947581	0	0.847977	0.706964	2.55728	1.75845	0.283862	0.213527	0.208954	0	0.162843	0	0.420682	0.455533	0.203694	0	0.27321	0.271225	0.755871	0	0.061642
MSTRG.1511	PGSC0003DMT400013309	5.30685	3.93665	15.0059	3.06977	2.83112	3.2382	1.30089	3.8628	2.9558	32.5755	37.274	3.3091	3.18451	3.07737	6.66296	1.2884	1.64322	1.95658	2.92568	34.8559	29.6576	7.06652	8.01313	6.43525	2.07195	4.47921	2.20337	3.11535	2.63608	1.66051	2.90864	2.8692	2.6357	5.67906	2.57279	3.00765
MSTRG.1513	PGSC0003DMT400013354	5.16341	5.08879	2.62746	3.15396	2.36743	3.57934	2.17929	2.90062	2.42919	3.15426	2.50754	3.8391	2.9415	2.28284	3.10262	2.48687	2.91455	3.93591	3.51547	2.05539	2.40386	3.83653	3.88667	2.43924	2.59207	3.51377	2.33237	2.96704	2.93375	4.96329	2.34627	1.86411	3.24029	2.99277	2.23068	2.2643
MSTRG.1515	PGSC0003DMT400013305	159.768	159.834	143.02	165.337	152.194	145.121	154.616	156.887	187.874	129.571	138.12	177.156	138.583	124.806	148.322	130.814	149.151	162.068	212.346	128.489	126.022	192.445	196.792	171.282	121.761	131.818	152.106	165.817	182.624	218.905	129.623	140.067	143.976	167.162	140.549	138.933
MSTRG.1507	PGSC0003DMT400013317	104.439	107.337	98.2163	92.1228	88.5881	84.0537	79.1834	105.312	88.4963	136.641	143.356	113.112	65.9201	77.1801	68.7577	91.6659	55.3837	79.2194	54.1097	112.669	101.911	68.4211	69.3883	62.0781	87.6077	98.1238	71.4039	115.354	52.4579	33.9503	87.1352	70.8351	66.2364	85.1721	88.7538	102.154
MSTRG.1518	PGSC0003DMT400002874	2.81211	2.7267	1.65424	2.72702	1.45673	1.23192	5.67773	1.83981	1.62953	1.18453	1.78811	2.86932	1.37199	3.31886	1.03359	3.63408	4.5939	0.989871	2.33794	3.16233	0.349193	1.83606	0.648076	1.14819	0.58316	2.66071	4.33554	1.02762	0.888484	0.933549	0.746549	3.2461	0.746511	2.10993	1.22262	1.22548
MSTRG.1521	PGSC0003DMT400002872	0	0.544868	0.252237	0.211175	0	0	0	0.215244	0	0.259367	0	2.40736	1.18685	2.54153	0.554274	0	0	0.258831	0	0	0.347597	0.074606	2.78776	0.120167	2.22236	2.36568	0.330705	0.219538	0.042475	1.70639	0	0	0.04602	0	2.65542	1.26596
MSTRG.1520	PGSC0003DMT400002877	21.5091	16.9765	13.087	13.1126	12.3365	11.8511	6.28659	7.42728	10.0182	12.4559	12.0714	23.7543	10.721	12.457	12.8704	14.1778	7.32766	8.96729	23.2471	9.35234	10.4494	11.9468	11.6419	10.1844	13.833	15.616	12.8716	23.8194	14.3572	4.63481	10.0194	10.1722	9.75869	9.45277	7.95561	9.48376
MSTRG.1525	PGSC0003DMT400002876	0.184625	0.268373	0.275246	1.608	2.04486	1.80848	1.36913	2.18387	1.46046	0	0.484176	0.329231	1.63998	1.75404	5.43268	1.46496	1.15437	1.32393	0.032835	0	0.257593	1.31983	1.50087	1.91567	0.653262	1.14366	0.264945	0.091724	0.084052	0	1.25282	1.98372	2.26533	1.02204	1.30091	2.76928
MSTRG.1527	PGSC0003DMT400002862	1.76987	0.461067	2.33048	2.63433	0.576864	1.51994	0.529575	0.652212	1.13337	0.224282	0.870004	1.71886	3.31786	0.750824	0.301407	0.964258	1.02329	2.63375	3.09471	1.56727	0.484868	1.76356	0.414014	0.420555	1.24953	1.23621	0.248799	1.17335	0.762328	0	1.01974	1.25302	1.09781	0.513439	1.80663	1.03394
MSTRG.1526	PGSC0003DMT400002861	15.7738	10.9415	7.01204	12.6281	12.251	14.6876	12.2454	8.50055	3.49671	7.71022	8.083	12.153	10.1202	9.52565	10.5893	10.2002	8.01588	10.3359	11.369	6.39019	8.28497	12.2013	10.9378	10.5089	10.7955	14.2664	6.57953	12.8468	12.178	13.0668	10.6799	12.2131	8.45962	9.02821	12.2406	10.0627
MSTRG.1524	PGSC0003DMT400002866	54.3181	47.3448	44.2085	36.6456	31.6226	35.3318	31.5343	24.1874	30.8629	33.7497	27.4312	45.7093	46.4314	41.2889	40.0326	42.9223	28.2867	36.7137	65.3504	29.6394	32.7844	39.6993	34.9591	32.6708	41.7157	38.7126	36.734	57.9976	50.8785	45.9119	34.7934	30.4126	35.4424	27.7839	26.9916	32.1582
MSTRG.1538	PGSC0003DMT400002209	1.88	1.47521	2.10728	0.686754	0.635519	0.845931	3.07697	2.3176	1.3918	1.54438	0.965483	5.98493	2.42909	1.73131	2.28664	0.972808	1.44274	0.563499	0.839686	0.941248	0.361548	1.05258	0.523519	0.695136	0.573828	0.286099	7.25403	1.54567	0.399185	4.70821	3.1119	1.60374	1.0158	4.48512	0.013567	2.93215
MSTRG.1534	PGSC0003DMT400002180	3.4573	6.29839	2.64994	4.78944	3.98839	4.88131	6.81852	5.22412	5.43624	2.34318	2.36616	4.79661	7.09196	5.85073	5.87002	7.57444	8.04253	9.59947	7.72974	1.76672	1.12689	4.37542	5.83222	5.90461	9.00814	7.97517	6.92784	3.52732	5.10041	3.93875	4.51529	5.66046	6.20543	6.63103	5.8683	4.26013
MSTRG.1544	PGSC0003DMT400086967	0.173342	0.929012	2.94374	0.612402	1.02251	2.0573	0	1.78293	7.54267	1.16471	0.444825	0	0.313957	0	0	15.1122	2.4491	7.74551	3.7061	0.99448	1.84583	0	0.182264	0.497409	2.38258	0.141136	7.07776	0.598081	1.02198	0.691045	0.678747	0.346908	0.414201	3.90589	4.35283	4.17448
MSTRG.1543	PGSC0003DMT400002219	0.652323	0.214045	0.132478	0.433783	0.308189	0.158639	0.103308	1.04041	0.853911	0	0.218916	0.099191	0.297802	0.061286	0.038758	3.48973	0.499944	1.3164	1.00749	0.151721	0.122928	0.015228	0	0.052698	0.474014	0	1.15887	0.139306	0.393181	0.302154	0	0	0.078889	0.42283	0.747009	1.28029
MSTRG.1541	PGSC0003DMT400002187	4.54149	4.7697	4.41376	3.93441	0.771006	3.33628	3.7513	1.65072	1.50046	4.81539	5.77632	3.72159	2.89155	2.47946	2.4896	2.91987	3.16153	2.87331	2.76534	4.69996	4.02666	2.22867	2.72072	1.71726	2.71263	0.391218	1.7732	3.58916	0.891136	2.68285	3.25242	2.0184	2.83327	3.55743	4.05489	2.97106
MSTRG.1546	PGSC0003DMT400002222	2.21932	4.83274	15.6496	5.83608	9.26147	10.7744	3.92033	2.3587	3.12357	8.73605	2.70665	6.97377	7.77478	6.97347	1.44113	3.68397	5.4031	4.09108	12.5132	3.0558	7.06771	2.34512	4.80121	2.18736	1.4204	1.66204	2.07563	6.54182	12.0478	11.659	1.50703	5.26029	2.00589	1.21785	2.59204	1.63352
MSTRG.1546	PGSC0003DMT400002220	0.681403	3.62895	17.1447	12.4987	25.2998	8.15319	1.89781	1.77605	1.51989	6.83538	5.47795	2.7991	10.8241	9.83512	3.15577	4.88232	4.10034	3.62541	16.7273	4.5306	8.90151	5.34547	2.19158	6.02895	2.51031	2.42503	5.22633	8.75289	25.7034	15.2156	4.62679	14.2111	3.52472	5.26494	2.3102	2.08509
MSTRG.1547	PGSC0003DMT400002189	1.0104	0.903519	1.32964	3.22704	2.84272	2.37071	1.11631	2.10483	1.73802	1.20968	2.00031	1.25103	1.49958	1.63414	2.28384	1.65773	1.20087	1.50083	1.00966	1.54128	0.883398	2.11444	1.91731	3.50321	0.901645	0.98405	1.19794	1.05617	1.36255	1.51109	2.57133	2.86655	1.50515	1.55108	1.61445	1.04141
MSTRG.1553	PGSC0003DMT400002227	0	0	0.522488	0.61784	0.264187	1.18443	0.286929	1.13704	0.985883	0.656221	0	0	0.2892	0.241709	0.424133	1.27441	0	0.356352	0	0.412962	0.261292	0.251759	0.308923	0.073183	0.786647	1.06211	0.532429	1.81459	0	0.226405	1.33315	0.443984	0.610367	0.254313	0.181358	0.681725
MSTRG.1556	PGSC0003DMT400002201	0	0.343136	7.30463	0	10.2958	2.89575	19.9656	11.2552	4.06338	1.8339	2.70606	2.0176	2.73236	1.86849	6.72198	22.5772	15.49	116.645	4.45934	1.78546	2.2699	25.3539	12.8144	0.934262	59.7249	24.0498	46.5757	0	0	2.93207	6.83585	19.7889	9.63077	23.1083	22.0473	8.59395
MSTRG.1555	PGSC0003DMT400002199	4.14102	3.85245	4.05774	2.84165	1.54825	3.62527	2.63512	3.81738	3.53875	4.56026	1.21034	1.16044	3.29743	3.34699	3.46895	2.40811	2.5211	4.3348	3.81553	2.85496	2.13567	4.74643	4.3095	4.04889	3.78013	2.32194	3.07274	1.48587	4.60216	2.8727	3.01641	2.96535	2.86489	4.32528	3.25176	3.48734
MSTRG.1558	PGSC0003DMT400046252	41.5089	50.6768	29.745	36.7347	39.6924	46.8648	39.1409	29.7161	32.1751	30.2156	30.0483	43.3951	40.559	46.2046	49.432	32.1228	31.2944	41.5985	45.6677	28.9375	29.4034	36.6398	33.3304	45.1316	34.3146	24.6233	39.3247	40.2814	42.619	45.2129	34.9465	39.0262	40.3587	26.4	36.1523	27.2852
MSTRG.1560	PGSC0003DMT400046260	0	0	0	0	0	0.105621	0	0	0	5.97205	6.07646	0	0	0	0	0	0	0	0	0.052393	0	0	0.685426	0.068211	0	0	0	0	0	0	0	0	0.141402	0	0	0
MSTRG.1562	PGSC0003DMT400046251	3.36145	3.87908	1.02401	1.13484	0.163386	1.97777	0	0.703199	0.14268	0.251554	0	1.06115	1.0624	1.25062	1.38209	0.265076	0.225986	1.63966	0.882101	1.56365	0.72718	1.12104	0.991565	1.47185	0.541358	0.665737	0.558103	2.68116	1.53703	1.52341	0.294811	0.829311	0.933332	0.74111	1.49062	0.168645
PGSC0003DMG400017960	PGSC0003DMT400046262	0	1.01186	0.725815	0	0.234743	0	0	0	0.204994	0	0	0	0	0.208721	0.43043	0	0	0.10449	0.213359	0	0	0	0	0	0	0	0.400924	0	0.291097	0	0	0	0.286072	0.177464	0	0
PGSC0003DMG401017953	PGSC0003DMT400046249	0.820331	1.76516	0.164381	1.43942	0.393413	0.529136	0.510175	0.11364	0.315213	0	0.673639	0.734432	0.452194	0.070721	0.663657	0.574441	0.322132	0.594604	0.142314	0.188253	0.264979	0.613195	0.964686	0.485178	0.359251	0.736316	0.268767	1.71186	0.376825	0.033715	0.8994	0.132679	0.620267	0.371175	0.317602	0.241208
MSTRG.1561	PGSC0003DMT400046255	11.4782	17.6829	15.1384	5.44068	7.25149	8.37313	6.38238	6.85684	2.81129	7.03988	16.8152	15.4753	0	1.18262	4.32142	11.8593	7.44708	12.3066	1.8066	12.4625	9.98873	4.60907	9.7389	3.35925	6.45444	5.72631	3.58269	0	9.82195	0	1.75283	5.47336	8.20029	4.27903	6.55796	0
MSTRG.1559	PGSC0003DMT400046261	54.8889	50.6671	38.4948	28.4317	25.1746	29.0368	30.7412	37.2421	36.0109	47.9123	44.5436	59.0583	31.8607	28.2447	32.29	36.1826	21.1112	34.7688	44.1163	38.6589	34.2187	30.201	35.1209	26.9496	31.3182	52.6804	36.6365	50.571	30.9731	20.9905	33.1226	22.2684	32.5876	25.3253	26.8943	40.6615
MSTRG.1568	PGSC0003DMT400017326	0.467949	0.849396	0	0.241519	0	1.40112	0	0	0.068385	0	1.2028	0	0	3.24828	0.141084	0	0.476747	4.52494	5.80407	0	0.800177	0.283033	4.76786	0	0.273911	0.955828	0	0.024592	4.52688	0.071279	0	0	1.21169	0.210623	1.7926	0.302992
MSTRG.1567	PGSC0003DMT400046254	39.9119	35.6879	31.5209	21.202	20.0241	21.7527	15.2665	24.2132	26.6715	35.6916	32.3887	40.354	20.2936	17.9155	20.3444	22.926	16.8088	25.9842	31.0277	28.427	22.1737	21.1762	24.9881	21.5854	19.764	27.9577	21.9018	30.1547	20.8489	17.51	21.4836	17.771	20.1739	20.6292	17.1526	26.381
MSTRG.1571	PGSC0003DMT400017573	6.27224	9.45679	6.79758	10.0545	9.39951	7.07026	7.03063	9.48513	10.2817	4.72568	5.27059	7.21232	10.0613	7.81519	8.18712	8.96859	4.79648	9.55809	7.56879	3.18649	3.1711	11.0328	8.97225	7.04766	8.70842	10.5749	9.38801	9.32357	5.97159	4.35766	8.00409	7.38176	7.92508	9.35524	8.00487	8.77359
MSTRG.1574	PGSC0003DMT400017574	0.354346	1.31264	0.400704	0.989426	1.09248	0.61431	0	0.388596	0.348513	0	0.810345	0.681078	0.394694	0.232464	0.96804	2.11751	0.404574	0.148768	0.334149	0.536048	1.36268	0.307843	2.38205	1.33003	0.936305	0	0	0.635344	0.290359	0.164084	0.818844	0.898007	0.253113	0.912707	1.37574	0.439265
MSTRG.1575	PGSC0003DMT400017576	7.85542	9.34108	21.337	10.8752	12.6966	12.1559	12.6153	11.0198	11.6285	18.9407	16.9126	9.7488	9.01513	9.3369	13.5398	10.5277	10.626	12.7593	12.4363	17.2375	20.0837	12.1351	12.4577	11.3369	11.231	11.6215	9.89215	8.05058	10.7607	13.8662	10.1994	12.912	12.7284	14.0427	10.4114	9.64819
MSTRG.1577	PGSC0003DMT400017577	5.86548	1.00725	8.61087	9.25756	0.559422	6.13448	8.62255	5.42973	1.93626	1.9996	2.27075	0.939985	3.57205	6.52568	2.39579	3.97793	23.8556	0.525951	24.863	2.12441	0.46302	1.10261	34.6209	2.8167	2.27408	0.927351	3.08425	2.13918	1.0059	0.554143	6.84258	0.910954	0.452995	8.74452	1.13172	7.69846
MSTRG.1582	PGSC0003DMT400091327	1.22003	0.533767	0.488941	0	0.229358	0	0	0	0	0	0	0.397914	0	0	0	0	0.343131	0	0	0	0	0	0	0	0.148888	0	0	1.40359	4.07312	0.657863	0	0.390662	0.445644	0	0	0
MSTRG.1578	PGSC0003DMT400017579	44.819	39.4372	30.0042	32.426	31.8689	29.9099	27.8889	30.077	33.5984	35.0174	29.6556	41.7048	34.412	31.1162	29.0984	33.0007	24.3247	32.1496	33.8218	30.1001	26.7922	33.3987	32.4082	28.0453	34.2153	35.4212	29.0453	34.6859	27.2732	18.2105	34.0054	29.8466	27.6193	29.268	29.8752	30.0582
MSTRG.1581	PGSC0003DMT400017344	9.37717	6.523	19.2649	5.40771	6.13014	8.17235	8.09653	5.22303	11.0148	3.92817	5.31064	8.24559	9.56527	12.0742	10.4324	9.88221	9.86612	10.4502	12.9472	6.93537	9.061	10.8467	12.0584	9.49853	8.28298	13.4929	6.37157	7.1285	11.3751	16.1066	8.2595	3.06007	15.2945	7.70394	9.20185	7.58183
MSTRG.1579	PGSC0003DMT400017341	17.2171	12.9051	44.175	39.4513	39.4816	36.8299	40.8243	36.6447	42.3226	64.4013	58.1211	18.3287	32.9925	33.8552	34.5809	31.4889	24.6326	29.0374	23.5576	48.9209	53.5393	37.7334	37.4853	38.4787	26.2666	29.3956	28.0119	18.5846	17.0055	11.848	40.1254	42.4695	35.1622	30.5694	37.1735	36.3781
MSTRG.1583	PGSC0003DMT400017584	0	3.45738	0	6.47799	1.97895	2.71974	0	3.19613	2.29773	0	4.65949	3.6243	0	0	3.9727	1.31064	0	0.897913	0.473792	0	1.43355	2.97652	3.4537	2.01346	2.33961	1.28817	3.24436	4.0472	1.71369	0.774799	2.65929	0	1.99971	2.54706	0	1.00477
MSTRG.1584	PGSC0003DMT400017586	8.93029	6.85715	15.4513	8.01404	6.55703	9.26039	6.5888	6.34326	8.79272	18.1655	16.238	6.96363	6.03871	6.95844	6.6445	7.52626	5.25669	7.45213	7.82537	15.3217	16.799	6.50494	7.84029	6.91667	6.28001	8.38143	6.80053	7.36578	6.7042	5.78915	7.55527	7.87807	7.76328	8.01697	8.58669	8.43221
MSTRG.1585	PGSC0003DMT400017587	10.5128	12.3666	14.9618	19.6011	24.3297	16.2954	10.6348	14.2116	8.07286	23.1677	19.4892	7.30004	14.9797	17.3536	14.0444	11.9776	12.8777	13.2405	12.991	15.6328	17.6145	13.1713	14.5867	21.7165	14.9442	9.14653	19.3612	14.8324	11.8778	13.4611	21.6111	23.7533	14.6136	12.3544	16.4661	16.7434
MSTRG.1588	PGSC0003DMT400017386	0	1.61618	0	0	0	0.270969	0	0.348642	0.606441	0	0	0	0.558218	0	0.291711	0.366405	0.472696	0.383556	0	0	0	0.418217	0.424902	0.135566	0.571635	0	0	0.492744	0.171771	0.10485	0.14423	0	0.10354	0.362139	0	0.41845
MSTRG.1590	PGSC0003DMT400017589	0	0.907451	0	0	0	0	0	0.194333	0.678445	0	0.107969	0	1.02318	0	0.573434	0.458161	0	0.326002	0.064265	0	0.062702	0.445171	0.284401	0	0.388892	0	0	0	0	0.07244	0	0.194375	0	0.353658	0.604931	0.063924
MSTRG.1591	PGSC0003DMT400017590	60.9125	58.1428	24.6296	20.2478	12.1644	21.1512	15.5076	15.664	16.6315	24.2735	5.30796	63.9662	25.238	18.8583	25.4832	27.6464	18.8816	30.2732	48.9869	16.4682	19.0004	19.1517	19.451	22.0267	22.7843	23.3437	26.1256	45.7256	45.8588	51.991	18.0664	9.87577	17.831	18.8835	11.21	13.4703
PGSC0003DMG402006827	PGSC0003DMT400017603	0.940438	0.915003	0.565338	0	0.33826	0.909912	0.330642	0	0.483852	0	0	0.455487	0	0	0.372142	0	0	0	0.360325	0.391705	0.729327	0.281078	0.949294	0.329456	0.438128	0.458204	1.61762	0.581092	1.22977	0.231096	0	0.503557	0.243325	0.201509	0.75049	1.23877
MSTRG.1592	PGSC0003DMT400017594	0	0	0	7.14681	8.43041	8.48869	0	13.6276	6.14138	0	0	0	0	3.59011	3.98184	8.75348	6.05415	0	0	0	0	0	0	6.20218	0	3.04555	0	0	0	0	0	4.70043	8.37638	4.9515	12.5794	6.82808
MSTRG.1592	PGSC0003DMT400017593	0	21.2859	0	0	0	0	0	0	6.6971	0	0	0	0	10.0943	3.03357	0	0	13.4876	0	18.6857	17.6627	0.577726	2.06417	9.78	13.908	0	14.9881	0.614217	20.4138	0.373368	9.7961	12.0129	3.15569	12.0939	0	0
MSTRG.1592	PGSC0003DMT400017592	0	0	0	0	0	0	0	0	0	0	0	0	0	0	0	0	0	0	0	0	0	0	0	0	0	0	0	1.34931	0	0	0	0	0	0	0	0
MSTRG.1593	PGSC0003DMT400017392	9.97023	7.46163	102.552	23.1425	24.2918	23.7532	16.9734	18.7894	18.5853	170.113	138.305	8.9569	17.5803	17.1594	15.7765	20.0986	16.9134	18.6906	9.87656	124.839	161.668	16.352	19.9861	19.3653	15.1027	16.2622	16.1515	7.64272	6.66072	5.17141	21.1621	22.2576	22.0695	16.0382	17.9932	18.7059
MSTRG.1594	PGSC0003DMT400017396	13.7324	15.1297	14.5358	20.1358	14.8435	17.2915	14.5538	14.8129	17.6101	12.2671	11.3401	11.6069	16.858	15.3269	15.9	13.8641	17.5852	12.295	15.1644	12.1468	16.7195	20.7806	14.7326	16.9246	15.437	16.0891	12.1022	12.4632	13.8601	17.0312	15.4795	16.8726	21.7046	17.8124	16.7964	14.3952
MSTRG.1598	PGSC0003DMT400017406	9.92195	13.9156	37.2072	15.6433	16.0422	18.2041	13.4568	16.2213	14.6162	42.1655	36.6227	16.9966	22.8624	19.8545	14.4451	17.9849	9.61701	15.0811	19.7292	33.8949	39.5107	21.7204	18.3482	8.03861	20.3661	8.25151	15.532	17.0395	25.2311	21.591	15.9711	19.4963	10.8409	19.2616	22.8072	16.3359
MSTRG.1600	PGSC0003DMT400017408	2.50547	3.31882	2.55644	2.11618	1.32624	1.80326	2.2161	2.30826	2.7876	3.36149	4.94729	3.29949	1.95539	1.80408	2.71741	1.98407	1.50907	2.69328	1.73256	3.20404	2.37726	2.25503	2.75353	1.13468	2.10835	3.0565	2.22168	2.3684	2.05994	1.39179	2.52192	1.52276	1.71509	3.07417	1.65491	2.42037
MSTRG.1601	PGSC0003DMT400017610	5.62666	5.538	7.12427	9.98672	8.84859	9.44563	8.54242	7.8666	9.01688	7.40665	6.37956	6.87235	6.72945	7.46038	8.41517	8.97972	7.2957	6.62672	5.50101	5.15082	7.68101	7.86793	9.43201	7.00761	9.30724	4.65994	7.7329	6.05204	8.75778	4.86458	7.86608	9.854	6.20193	7.76976	11.6102	6.85363
MSTRG.1599	PGSC0003DMT400017609	66.5803	60.4257	73.748	110.442	90.588	100.618	75.345	81.4979	81.9243	90.7912	75.9729	68.9423	59.0417	77.1142	71.2821	59.0555	48.2751	56.4441	61.943	80.3049	82.2505	72.2825	78.2983	124.266	53.6163	55.6231	59.8363	59.9159	57.8159	50.4168	109.771	100.005	80.8878	67.7888	69.8387	85.8044
MSTRG.1604	PGSC0003DMT400017614	3.8944	2.4708	2.39059	1.84474	0	0	0	0.649128	0.973959	4.45181	2.86027	1.85763	2.57974	1.74336	1.27361	0.606426	2.1852	3.17667	1.8835	4.79287	4.59792	1.57221	2.61452	0.970228	3.67937	3.1646	0.980891	1.16354	3.26477	3.58716	0.805519	0.384059	2.82776	2.0364	2.81088	1.83068
MSTRG.1603	PGSC0003DMT400017740	1.74671	1.17646	0.637665	1.9523	1.36132	0.777269	1.63764	1.09914	1.39848	1.82963	1.55949	1.3216	0.791883	2.05904	1.60066	1.41957	1.53952	1.69008	1.41486	0.956669	1.71168	2.7877	2.29318	1.54392	2.1265	1.72182	1.21639	1.66736	1.17901	0.087192	1.18962	0.750376	0.756852	1.37066	1.80618	0.907353
MSTRG.1596	PGSC0003DMT400017605	32.8482	28.8882	0.189813	15.6333	7.08617	17.3388	1.82404	1.49912	7.34098	0.314822	3.9735	41.9215	11.776	28.0985	6.5808	34.2559	6.9222	14.3413	19.5082	2.92921	0.807657	7.12706	4.95411	9.62704	19.917	11.0459	25.9204	38.7493	8.48513	12.9488	18.2756	19.3616	2.38253	8.4218	1.55541	0.512974
MSTRG.1606	PGSC0003DMT400017413	16.7732	16.7924	28.6213	13.4815	11.2524	12.9407	9.7011	14.6071	15.099	29.0827	31.7308	17.2342	17.0312	14.2317	17.6666	15.1743	7.19345	15.1871	22.4532	32.4639	26.608	18.9903	18.0611	18.8961	14.6982	19.3458	13.1461	18.2478	14.2596	15.7629	16.3252	14.4959	16.4804	15.6604	14.0922	13.72
MSTRG.1607	PGSC0003DMT400017416	0	0	0	5.43724	0	7.85007	8.55533	0.162776	10.8197	0	0.097269	0	0	0	0	0	0	0.055868	0	0	0.069668	0	0	0	0	35.4339	0	0	0	0	0	0.17997	0	0	0.171179	10.0582
MSTRG.1608	PGSC0003DMT400092423	254.886	301.544	5.32662	0	9.54145	0	0	38.0936	0	5.23404	7.48939	269.741	57.7961	17.1742	88.2947	22.4328	16.2216	25.221	4.96629	8.95691	11.8276	48.8934	36.8377	23.8865	13.8292	1.47173	15.3881	197.316	226.66	306.857	18.8818	16.6913	28.9811	24.7353	23.5421	0
MSTRG.1608	PGSC0003DMT400017419	158.942	188.437	3.89974	0	5.40712	0	0	23.5237	0	3.28858	5.59415	166.163	35.968	10.8582	52.2806	13.6045	9.97978	16.7596	3.55934	5.4684	7.18589	29.9832	22.481	14.1423	8.2697	0.080369	9.87336	119.864	142.694	195.936	12.0739	10.3719	18.1937	15.2206	13.9674	0
MSTRG.1613	PGSC0003DMT400017443	70.0277	72.4674	106.143	160.019	157.143	169.092	157.297	139.722	127.301	118.573	84.0065	65.8903	115.42	132.337	134.13	104.663	100.843	109.121	99.176	115.71	116.484	96.7232	104.89	183.151	89.8334	98.9552	95.3622	81.7645	87.9593	91.358	143.008	174.786	157.441	90.846	159.614	156.765
MSTRG.1614	PGSC0003DMT400017624	0	0.638854	0.298083	1.51677	10.0783	0	7.81702	3.22091	0	0	0	0	0	7.66446	4.00926	3.46848	0	0	3.52139	0	0	0	0	1.77456	9.18633	0	0	0	0	0	0.560073	0	0	0	10.2914	7.2739
MSTRG.1615	PGSC0003DMT400017629	16.6773	14.9467	35.5767	27.406	29.0359	26.5968	15.3232	23.2062	29.391	32.7871	25.874	18.1421	14.4466	24.9465	23.8883	25.2143	28.1037	20.622	18.9852	42.5419	35.635	28.0461	28.3461	37.2262	15.5624	16.3916	20.4804	14.0495	20.09	29.9879	23.9267	37.6601	27.9759	30.2778	25.5475	33.896
MSTRG.1616	PGSC0003DMT400017445	0	0	2.6559	0	22.1088	0	0	0.976454	2.86153	63.2051	60.6475	0	0.488676	1.47069	0.983653	0.329818	0	0.566236	0	34.6637	21.2098	0.063601	0.987068	1.96979	0	6.28987	0.179847	0.439151	0	0.182113	0.123298	0.836656	1.77661	1.12253	0.084307	12.674
MSTRG.1617	PGSC0003DMT400017630	4.47624	8.63303	25.7287	8.53694	7.56724	10.2444	12.2653	9.01521	8.36018	43.2457	39.5327	6.12089	6.83339	8.23836	6.98635	7.66803	8.45436	7.94362	4.95238	42.3557	48.7147	5.53773	9.02552	8.76928	6.42404	6.28398	5.88248	6.09716	5.89468	8.12386	7.68066	9.27458	11.4566	8.44748	9.0658	9.68494
MSTRG.1619	PGSC0003DMT400017450	0.576719	0.520155	1.09906	0.324218	0.377078	1.16858	1.01524	1.68274	0.354517	0.830037	1.49971	0.873028	1.08426	1.38299	0.758988	0.492654	0.697603	1.37645	0.342332	0.835664	1.07372	0.696736	0.322697	0.635934	1.00153	0.713794	0.680375	0.425154	0.091952	0.109454	0.874591	0.549407	0.587037	0.777037	0.377548	0.334957
MSTRG.1620	PGSC0003DMT400092874	0.971883	1.41069	3.49223	5.22135	4.8796	3.89618	5.11676	5.50144	5.94991	2.74386	3.17664	2.58669	4.01705	3.68672	4.49244	4.51693	2.80608	1.96366	2.10377	2.22032	1.99516	3.13515	2.37601	2.4651	2.64356	3.34282	1.99585	1.83998	1.09495	0.712228	4.66484	3.59301	3.17381	3.45712	4.19113	4.09206
MSTRG.1621	PGSC0003DMT400017452	1.61007	1.34553	1.22021	0.413918	1.37529	1.46076	0	0.668026	1.06441	0.717584	2.10391	1.19445	0.674247	1.13352	0.633657	0.85953	0.734409	0	6.591	1.19981	2.999	1.02782	1.1588	2.574	0.297573	1.35539	0.804085	1.22116	4.44375	0	1.58828	2.32552	1.47688	0.840287	0.848076	0.833125
MSTRG.1618	PGSC0003DMT400088761	0.739318	2.34686	1.37937	5.46822	5.00495	3.75924	3.66673	2.51272	1.78393	7.38785	4.93591	1.44562	12.105	5.01608	2.2913	4.68408	0.957538	4.55324	2.09191	4.19431	4.15121	1.65617	1.97203	8.20573	3.13402	0.967025	3.9346	2.05508	0.86266	0.330744	3.85445	3.43394	1.30183	2.30459	1.63299	2.79796
MSTRG.1618	PGSC0003DMT400017631	0.858607	1.97436	1.84848	24.2714	20.2537	23.2792	43.0862	43.2304	39.4497	1.65864	1.68684	1.5167	25.7286	22.4169	26.623	11.9868	8.13728	11.8553	3.19924	1.89037	1.28823	12.2116	26.3486	28.1337	12.2608	18.5655	8.20245	0.989716	0.461857	0.867765	30.4738	19.2747	21.5701	21.9834	28.145	25.4729
MSTRG.1618	PGSC0003DMT400017634	2.08823	1.02109	0.109749	2.43798	9.67802	5.40836	7.33356	24.7837	5.38281	2.29699	2.30708	2.16759	2.31264	13.7337	4.38176	0.007387	6.29789	1.72009	1.21048	1.81497	1.15557	2.41553	7.37613	10.2665	6.48133	6.07443	8.01605	1.92462	1.17264	0.687903	2.35327	10.7163	4.86554	9.7868	20.1285	17.1036
MSTRG.1618	PGSC0003DMT400017635	0.178626	0.461855	0.674452	7.00991	11.7634	14.4033	13.2262	33.3472	24.1987	0.509623	0.846793	0.397312	4.01726	2.46958	12.5701	4.37129	1.55162	5.65382	1.44097	0.831961	0.570276	4.18189	7.20931	4.43838	2.81608	16.0444	3.09274	0.454493	0.254925	0.307739	11.194	4.31139	9.25177	16.8159	22.1552	18.0445
MSTRG.1618	PGSC0003DMT400017637	0.207287	0.134147	0.437116	0.99853	0.149247	1.24751	1.57147	2.26901	2.32374	0.404242	0.39398	0.289972	1.01217	0.265123	0.308848	1.12357	0.49458	0.77618	0.714901	0.19124	0.219643	1.05253	1.07882	0.848627	0.479161	1.34378	0.366734	0.113255	0.172348	0.303808	1.25906	1.24259	1.12423	0.322234	2.12878	0.439777
MSTRG.1618	PGSC0003DMT400017638	1.45805	2.47618	3.40954	4.96787	5.0698	2.39161	2.98282	3.57961	4.21561	3.3594	4.483	2.56699	3.59756	4.87453	2.91209	4.09391	2.53617	1.87586	2.1992	2.00441	2.82584	2.92198	2.42717	2.82498	2.41041	1.89735	1.77972	1.86173	1.50089	1.61727	4.78795	2.6338	1.81686	3.6141	3.74795	2.97958
MSTRG.1622	PGSC0003DMT400017646	197.261	142.505	139.181	97.5415	90.4978	93.2492	50.4017	58.5917	68.9982	69.1875	70.2181	222.879	148.813	95.507	103.055	179.444	136.878	138.14	311.521	85.9769	92.9269	160.007	123.069	68.8095	161.422	194.848	163.679	211.779	229.509	184.992	87.4086	74.8225	105.073	153.569	60.3447	78.2557
MSTRG.1630	PGSC0003DMT400017459	15.956	14.6011	13.8781	14.068	15.5551	15.9005	10.5234	12.147	13.86	21.9986	21.3554	16.1718	9.29379	14.1044	12.9903	9.02343	10.0313	11.1613	14.6326	13.4008	14.3433	12.5412	12.418	18.8061	11.0955	11.544	12.6644	16.8743	11.5364	7.15738	17.7962	18.3095	12.7484	10.6425	11.404	15.4811
MSTRG.1634	PGSC0003DMT400017461	4.08634	2.45364	3.63427	4.74676	3.42178	4.39788	3.45864	4.72144	3.4835	5.62967	4.18225	4.12715	3.40532	3.155	3.2224	3.54567	2.17733	2.65061	3.12564	4.32885	3.75766	2.58999	3.32391	2.71934	3.84244	4.89297	3.08979	5.49038	2.59289	1.08383	4.76747	3.25458	2.89188	3.58711	4.32803	3.34608
MSTRG.1635	PGSC0003DMT400017657	31.2511	37.6544	27.4008	27.1016	25.2186	26.6988	23.4403	23.6717	28.0394	33.0648	34.0199	34.1795	20.3833	25.4765	22.9271	21.1757	16.4248	23.212	29.9286	34.0683	29.8303	27.2792	24.2465	26.7683	21.2716	21.011	27.0347	31.1084	22.5415	18.5933	27.0072	26.9536	22.6809	22.5566	21.7278	22.2247
MSTRG.1642	PGSC0003DMT400017667	0	0	0.169425	0	0	0	0.527155	0	0	1.26234	1.31399	0	0	0.117567	0	0	0	0.121423	0.14742	0.915327	2.36677	0.113741	0.406428	0	0.325136	0.219194	0	0.31088	0	0.274524	0	0	0	0	0.166181	1.17301
MSTRG.1641	PGSC0003DMT400017661	0.506347	0.620198	1.43282	0.248231	0.400142	21.0384	0.477494	0.63228	0.303747	0.546388	12.3103	0.705231	2.02842	0.467214	0.142675	0.741052	1.4243	0.386396	0.303393	9.0695	0.125492	9.51712	0.5939	0.408179	0.334212	0.293861	0.454976	2.40023	3.7169	0.533361	0.403277	0.352495	12.0388	0.334738	12.6641	13.2274
MSTRG.1643	PGSC0003DMT400017476	16.8422	24.8571	0	0	0	1.37321	0.554441	1.21898	0.439852	0	0	15.93	0	0	0.312015	1.07187	0.235359	0	0.111357	1.01782	0.417382	0.194591	0	0	0.110508	1.23648	0.273189	25.7969	24.9287	33.2878	0	0.144918	0	1.78813	1.02329	1.36297
MSTRG.1643	PGSC0003DMT400017477	12.8478	20.52	0.379528	0.299522	1.3516	0	0	1.96781	1.23742	0.279699	1.19786	12.5926	0.298301	0.175574	0.166553	0.294734	0	0.275674	0	0.217325	0.224595	0	0.46522	0	0.481543	1.28552	0	15.9374	23.4314	36.0667	0	0.126866	0.115307	1.12892	1.01764	1.55637
MSTRG.1644	PGSC0003DMT400017741	10.9823	25.6599	1.42822	2.39819	7.16455	2.75847	2.22192	10.1056	2.23876	0	1.18003	17.6558	0	1.15625	1.04043	0	0.472784	1.0374	0	3.67205	1.35061	0.390888	1.19311	0.852194	0.22425	5.90544	0.583803	20.4096	22.6299	34.1767	0.308386	0.660816	1.08479	7.4914	4.57221	11.7666
MSTRG.1645	PGSC0003DMT400017478	14.3542	34.3493	64.0097	16.3902	28.5507	12.4108	16.2235	17.3363	12.1882	78.8921	73.1397	21.8549	11.5885	12.5683	20.1652	15.2316	17.3564	10.2109	5.18302	107.97	114.022	14.9091	16.4016	25.9109	11.3772	19.9545	13.4456	19.991	27.2512	40.6432	13.6419	26.8094	19.0091	15.0261	17.2252	29.1384
MSTRG.1646	PGSC0003DMT400017668	4.94704	24.2502	7.02443	10.544	13.5441	24.9346	28.4021	40.4511	46.696	31.6449	19.3524	11.1447	40.1776	22.3176	65.1739	21.7982	12.1152	36.7982	8.05829	24.4697	23.0381	48.1105	48.3951	19.593	21.7627	174.48	16.3734	9.90146	3.006	7.08224	21.7381	11.652	50.459	25.0642	33.1494	31.3606
MSTRG.1650	PGSC0003DMT400017671	4.1845	9.93166	31.0341	653.278	589.499	541.321	500.227	293.444	382.718	8.80101	19.388	19.1799	200.235	360.612	317.624	367.299	381.776	296.03	59.2317	9.78518	19.4813	311.802	286.251	234.828	275.14	34.573	441.473	7.73515	8.14383	17.609	437.39	576.304	332.497	235.05	374.693	180.414
MSTRG.1649	PGSC0003DMT400017481	4.27755	4.04625	5.99959	6.79525	3.30943	7.86939	8.9304	6.23404	6.38126	5.1299	6.67402	4.16787	6.95843	6.54172	5.8068	4.84171	8.72594	8.75684	2.96112	4.1865	6.01468	5.73405	6.67403	6.04697	5.26267	6.57446	5.88423	3.562	4.49714	6.85633	4.74945	4.68757	5.7288	6.57441	4.62023	6.40841
MSTRG.1651	PGSC0003DMT400017673	0	0.735078	0	0.364221	30.2521	33.5295	4.10254	0.411486	1.61883	40.573	0	18.1915	0	0.576686	38.8693	27.8781	0	0	16.1817	36.1663	37.763	23.5182	0.141368	0.455323	0.380597	2.28803	1.72922	0	0	0	0.16846	0.497251	0.251778	31.2839	37.2507	0.186698
MSTRG.1652	PGSC0003DMT400017675	27.1786	24.7609	32.9998	30.2532	34.0472	29.952	30.0164	24.1086	25.8003	25.1148	27.0979	27.3284	31.4019	35.956	29.5777	26.1805	27.137	27.8062	40.4338	25.5988	41.6957	35.8867	36.2839	28.0155	29.4788	29.4601	25.4305	30.4997	47.3573	50.7262	31.7885	32.4655	37.178	28.7205	27.6099	21.9622
MSTRG.1653	PGSC0003DMT400017488	0.085422	0.163319	0.265194	1.01778	2.0562	3.137	2.15171	4.97667	6.97787	0	0	0	8.57004	3.78588	3.97098	8.93677	6.67492	7.75133	0	0	0.088815	8.43225	3.67336	0	5.95572	0.269239	6.99216	0	0.033984	0.133691	0.070667	1.37303	0.506259	5.96125	5.36016	2.98006
MSTRG.1655	PGSC0003DMT400017683	0.569246	18.2735	3.27816	0.296261	0.384361	1.65497	14.0835	6.97128	0.729477	14.8017	0	0.481909	18.2944	14.76	0.215171	4.01834	10.5763	0	0	0.053922	0.022288	0.612256	0	0.037458	1.91405	13.1703	10.6645	4.03834	0.138353	8.12298	0.634587	0.029989	0.290454	0.910098	12.7024	11.0619
MSTRG.1656	PGSC0003DMT400017688	2.29407	4.74828	5.99572	4.70205	0.317395	3.985	4.30931	3.57965	4.2614	8.91799	6.86499	2.19462	14.0834	9.49033	8.09081	9.51189	6.74878	10.5906	4.81356	7.82987	7.67766	4.19395	8.03112	4.07391	11.8956	0	10.5735	5.51854	4.11573	3.98627	6.66737	8.59503	4.2604	8.35829	0	3.87456
MSTRG.1654	PGSC0003DMT400017678	0	16.3557	26.8482	14.3589	26.9359	31.0467	17.0807	28.5446	8.41427	26.4831	50.4442	35.0342	12.6439	15.6992	20.6115	16.2201	18.7955	23.1467	15.4112	24.5032	19.9305	15.4622	18.9781	5.14803	9.61545	16.9266	20.1247	23.0392	10.1877	5.14633	30.5415	21.1671	16.1671	12.4263	20.1231	24.8561
MSTRG.1661	PGSC0003DMT400017515	13.5563	7.95789	5.17088	5.89563	2.50902	4.36082	3.70651	4.38545	3.53319	2.7333	4.14977	13.5055	3.68847	2.8034	2.88551	7.33039	5.60677	7.35541	4.90482	1.05579	0.8054	2.60282	2.22159	2.33411	5.69172	4.35809	5.20792	5.65566	5.29893	2.68031	3.19301	2.25273	2.71703	3.04574	1.63617	2.20237
MSTRG.1662	PGSC0003DMT400017518	2.35837	1.77957	4.85452	2.20407	0.915976	1.16333	1.07941	1.02696	1.15751	1.89435	9.13934	3.42279	4.04444	1.2471	1.25618	2.4532	0.019828	1.92501	3.51872	2.00193	1.05187	0.904426	0.58474	0.401784	1.93434	1.40085	1.43958	4.55129	0.149403	0.433742	3.95898	0.362728	0.229938	3.26027	0.634023	4.30617
MSTRG.1657	PGSC0003DMT400017509	10.2411	9.71013	2.67332	1.191	3.8588	3.82221	1.64079	0.691337	4.08385	4.61692	3.52253	6.89817	4.38302	2.62287	5.36685	1.27257	7.0226	5.08971	10.8053	2.36416	3.57252	2.07369	4.12172	3.32192	6.85959	7.64195	4.21178	8.20772	5.43098	3.45621	3.92525	3.11604	6.46533	3.47312	4.72524	4.77489
MSTRG.1657	PGSC0003DMT400017493	5.80472	5.65832	10.7975	2.28904	0.081462	0	0.215633	3.23005	0.273052	1.47338	2.38623	11.1779	0.215552	0.359877	2.57532	2.9681	0.226647	4.52898	3.02815	5.10905	0.932494	3.94674	2.97165	0	0.972338	0.543325	8.50417	1.01702	15.3667	14.7901	0.188984	0.987781	4.10809	3.02287	1.64653	5.70643
MSTRG.1667	PGSC0003DMT400017699	0	13.4311	13.2956	11.2833	11.308	11.3275	0	12.3408	10.263	21.1056	6.88488	12.8798	8.83682	8.68197	10.8388	9.43599	9.73703	10.5637	0	10.1027	14.3469	9.59347	9.03009	9.56894	9.67036	5.74943	3.30755	6.99184	10.8193	7.03804	10.5349	13.2329	10.8895	10.8353	12.7079	11.9792
MSTRG.1666	PGSC0003DMT400017743	7.32258	19.5679	4.03632	6.08997	4.22809	3.90414	7.74725	11.3166	6.2638	5.13015	8.18421	23.367	5.85449	5.44838	5.64195	5.62548	1.53624	5.85419	5.92133	6.14107	2.29859	5.82765	6.42564	4.73922	6.26551	5.92011	3.94539	14.7678	5.87687	1.8717	4.23978	2.93312	3.35603	6.79147	5.86747	5.82854
MSTRG.1665	PGSC0003DMT400017698	41.5063	49.0396	38.2182	45.3586	51.1282	42.2041	59.4107	56.776	42.6287	41.0997	47.0627	45.8384	46.3741	43.8643	46.318	42.0584	34.0575	51.4017	38.0405	41.1813	35.0729	35.1889	28.0687	43.5049	41.9431	57.268	40.3098	43.8887	32.7863	35.1476	49.8966	53.7418	48.8365	38.019	53.2917	53.1212
MSTRG.1670	PGSC0003DMT400017541	0	0	0	0	0.710943	0	0	0	0.125448	0.11827	0	0	0.159795	0	0	0.420965	0	0.068216	2.08436	0	0.028434	0.041851	0.514272	0.233539	0	0	0	0	0.095849	1.31001	0.392506	0.055573	0.241454	0	0	0
MSTRG.1669	PGSC0003DMT400017538	12.458	9.80383	3.79908	5.48072	3.10878	5.02391	4.55835	4.67966	5.49747	2.09408	2.18931	11.183	5.79223	4.93489	5.22086	6.68938	6.18689	6.3545	8.62991	1.08771	1.05596	5.56483	6.74022	4.32243	6.48158	9.85404	7.80954	10.3687	5.78857	4.98229	4.35863	3.48024	5.3726	4.75967	4.13619	4.47225
MSTRG.1671	PGSC0003DMT400017543	5.99479	3.06216	31.968	0.392831	1.21257	1.34793	0	0.944253	0.493892	59.062	69.2496	8.3888	1.6679	1.20252	2.59534	1.42406	3.2448	1.12142	3.37008	35.6205	29.5504	0.517403	0.789637	0.470006	0.8785	2.67473	1.14368	4.0031	2.76181	6.4548	0	0.535605	1.42584	0.513076	0.920153	1.85872
MSTRG.1668	PGSC0003DMT400017535	6.66465	15.8633	124.789	111.312	45.7456	43.3512	1.20603	38.3125	1.5321	178.961	2.3562	1.41614	78.4275	17.3456	20.4885	6.50805	76.5645	84.2866	11.646	127.577	57.7096	48.9156	4.83024	53.9645	17.0559	5.78981	20.8799	2.60712	3.65794	0	73.0519	21.821	70.4019	42.6189	6.01382	4.75922
PGSC0003DMG400006866	PGSC0003DMT400017707	0	0	0	0	0.187901	0	0	0	0	0	0	0	0	0.195583	0.319617	0	0	0	0	0	0	0.508264	1.79782	0	0	1.11076	0.276022	0	0	0	0.258745	0.27089	0.755073	0	0.172853	0.10587
MSTRG.1672	PGSC0003DMT400017546	5.86633	1.64758	4.58201	2.24973	5.45927	9.60106	6.49111	1.9578	4.79683	4.10387	13.1711	1.99665	2.32732	1.24094	0.759898	5.06547	13.9025	7.11702	3.76998	5.87324	8.46846	2.28187	0.930279	1.29523	1.89186	3.21126	1.82064	2.6069	2.44615	13.6093	2.69868	3.07613	2.22149	5.2409	1.5625	7.12214
MSTRG.1673	PGSC0003DMT400017710	140.501	132.978	203.196	407.063	387.693	382.734	490.651	416.23	512.678	246.149	249.93	147.848	367.179	437.371	428.772	327.338	297.487	368.564	164.429	218.128	249.388	450.877	458.036	390.276	257.099	274.101	276.786	130.063	145.578	156.037	428.708	424.266	403.909	309.328	444.783	354.166
MSTRG.1677	PGSC0003DMT400017716	24.6717	21.6582	38.39	9.17886	6.62091	11.1357	13.273	20.7074	25.0486	16.882	25.2769	27.8195	20.0923	10.3753	28.2551	13.5082	16.1707	14.6337	16.6609	20.8746	24.4537	19.6297	27.7518	14.8296	14.1332	33.1736	15.3401	15.561	48.2561	42.2968	13.963	9.22423	23.2588	20.4921	16.716	21.4558
MSTRG.1680	PGSC0003DMT400017717	12.0681	8.56582	16.7605	17.29	12.2888	9.40429	5.51696	5.60842	6.05998	7.73859	5.01485	12.5003	16.6725	15.6668	11.4705	11.718	9.37373	9.59361	25.1022	6.58162	9.03081	12.1728	9.86101	10.7069	10.1178	9.43292	9.65666	14.4642	26.3074	27.9819	10.7876	10.89	14.4451	6.51921	7.09143	6.61914
MSTRG.1681	PGSC0003DMT400017559	1.27699	0.591795	3.00249	1.32072	0.839885	1.26068	0.95291	0.781177	0.856142	1.48812	1.54575	0.313049	1.01256	1.15353	0.60769	1.53891	1.2122	0.862991	1.07734	1.67532	2.11829	1.76357	0.835697	0.636818	1.28217	0.890608	1.19326	0.98019	1.28385	0.630303	0.838103	0.629401	0.563251	1.32478	0.371117	1.01397
MSTRG.1682	PGSC0003DMT400017560	23.4901	17.4859	23.2364	11.2967	7.61364	11.0532	10.6612	11.6615	11.8127	13.7272	13.7447	23.2855	12.7292	11.4074	11.6133	23.5965	25.871	27.6666	28.0387	12.5096	14.8082	15.7161	16.0159	8.72378	19.8586	30.007	16.6304	20.0592	29.113	37.753	10.7543	7.11499	11.7091	13.5337	9.31846	13.1899
MSTRG.1683	PGSC0003DMT400017744	119.494	157.332	206.954	25.9551	19.265	29.1343	14.62	54.0378	28.1774	209.773	244.948	163.751	19.4935	21.7762	25.2159	29.6039	31.8519	27.7362	30.4742	211.572	213.792	16.6127	23.6263	28.808	29.8146	47.0892	40.593	126.746	157.934	273.007	23.2714	27.4721	30.1055	37.3005	28.3947	59.7347
PGSC0003DMG402006875	PGSC0003DMT400017723	0.407402	0.247555	0.439923	0	0.423324	0.134312	0.346594	0	0.090997	0.167119	0	0.365405	0.178233	0.514031	0.066343	0.531825	0.588519	1.09809	0	0	0.214711	0.124126	0.190388	0	0.667509	0.144478	1.28287	0.23845	0.106753	0.639986	0.154726	0.184883	0	0.403729	0.773452	0.112039
MSTRG.1684	PGSC0003DMT400017563	1.1775	1.6821	0.881224	1.84962	1.04903	0.498512	1.50856	1.16254	1.07346	1.52174	0.43836	1.39684	1.01844	1.02519	0.407534	0.974543	0.913538	0.508154	0.81403	2.06918	1.20417	1.31079	0.97626	1.60646	2.37512	1.42549	1.27459	0.954041	0.797785	0.106948	1.39611	1.57722	0.699601	0.629987	1.5986	0.365828
MSTRG.1686	PGSC0003DMT400017726	49.6539	48.3379	30.4332	29.5857	28.6471	30.3807	26.4751	26.7817	32.9245	37.4009	33.3632	46.3748	27.5824	25.5968	25.1688	32.3929	25.7314	37.1865	29.2009	29.7191	26.9296	28.2518	28.1269	27.2032	28.8184	33.0279	27.7224	35.5192	23.2765	20.2581	29.6665	27.0898	27.3506	25.4729	25.1736	33.1643
MSTRG.1687	PGSC0003DMT400017727	25.7144	0.989253	25.7745	13.3926	1.69347	2.35235	12.492	3.94661	2.55168	4.86225	10.5033	2.67905	15.3465	13.804	12.1387	14.5313	12.534	3.87102	18.6365	14.6128	1.43177	2.00018	0.632099	15.366	2.39769	1.89281	15.0193	1.25062	17.4298	24.701	14.5021	12.2964	1.77224	3.08207	2.03475	0.731745
MSTRG.1688	PGSC0003DMT400017568	0	0	0	0	0	0	187.297	0	0	0	670.431	0	0	0	0	0	0	0	64.0349	0	189.619	0	0	0	0	0	0	0	0	0	0	0	0	0	0	290.676
MSTRG.1691	PGSC0003DMT400017732	0.539642	5.16215	5.64433	1.32269	1.55599	4.12664	3.45514	1.907	1.71314	3.75327	5.55417	4.59442	6.79953	5.76085	0.44538	29.8331	0.498948	0.24712	2.51518	0.247801	1.29728	0.892094	1.41739	2.08202	1.20543	4.21343	3.05859	0.987365	2.97875	0.559898	5.31327	1.53818	2.51924	0.48392	20.5965	1.9644
MSTRG.1696	PGSC0003DMT400017733	0.17969	1.03797	0.225043	0.18138	1.34218	0.507086	0.519449	0.311151	0.469399	3.47285	2.94893	0.175819	3.42436	2.58913	0.78743	2.25619	0.81945	2.17294	0.338756	1.86079	2.01359	2.91635	1.18088	0.581871	3.20081	0	2.75045	0.818762	0.115155	0.276943	1.64823	1.32011	0.341856	2.63849	0.330544	0.998455
MSTRG.1697	PGSC0003DMT400017734	1.86598	0.327896	0	0	1.07135	0.294717	0	0	2.69816	0.142496	0.465203	1.75904	0	0.268528	0.123009	0	3.40859	0.552432	0.125058	4.77252	0.723586	0.300446	1.35	0.175888	0.25436	0.278924	0	0.416408	1.31266	0.177791	0.143161	0.501514	0.895591	0.010383	0.421797	2.4535
MSTRG.1689	PGSC0003DMT400017570	473.065	512.333	642.217	123.648	134.212	163.628	135.258	233.209	147.301	937.835	1020.63	517.342	153.137	111.17	215.875	105.537	96.7704	133.623	117.064	1086.09	998.432	90.2933	122.189	133.911	90.015	295.653	93.9339	408.41	409.223	587.547	140.116	131.581	221.125	158.648	181.714	240.009
MSTRG.1698	PGSC0003DMT400065032	0	0	0	0	0	2.92503	0	0	0	0	0	0	0	0	0	38.041	0	0	0	0	1.52098	0	0	0	0	8.54325	0	0	0	0	44.082	0	0	0	0	0
MSTRG.1699	PGSC0003DMT400065029	1.5648	6.10627	11.351	4.91617	19.7737	24.8711	0	6.18585	4.46291	6.62393	0	0	16.4897	4.71513	5.55547	5.71839	7.71807	0	0	20.5202	18.5749	7.64588	5.54393	51.2609	8.90976	6.67188	23.7507	3.62492	0.02186	7.63776	5.49839	3.14449	7.30586	5.86497	0	30.9938
MSTRG.1701	PGSC0003DMT400065028	18.8311	20.8189	49.875	35.3805	40.265	35.6805	35.5816	44.7179	37.8293	76.4618	64.3133	18.4738	23.9375	27.9716	36.4447	31.7315	26.3442	25.4321	15.2794	76.4545	83.6283	29.1364	33.3055	31.3296	23.7577	27.2669	20.8151	13.6445	12.201	13.1367	35.6397	35.1748	39.1007	34.9019	38.1454	43.4917
MSTRG.1700	PGSC0003DMT400065007	1.90796	4.25268	4.541	2.92305	2.80832	0.182013	4.76615	2.27825	4.50817	0.120322	0.365633	3.28893	4.62136	1.68913	1.10368	2.83998	9.40127	4.09351	2.82906	1.6726	1.41268	0.204514	1.47176	0.153062	0.097173	0.825273	2.55659	1.9898	2.87784	1.13622	1.63795	3.35751	2.78166	1.10843	1.09621	0.174799
MSTRG.1704	PGSC0003DMT400064995	0.893793	2.58455	1.09946	97.2051	85.0279	59.8229	106.407	69.924	57.6716	0.745645	0	1.01511	50.8212	101.885	53.092	59.7814	70.9312	43.5362	1.73728	0	1.51906	41.18	28.6341	126.055	40.2721	8.98467	52.0025	0.487308	0	2.89353	96.432	164.442	77.5088	43.062	90.3027	67.5068
MSTRG.1703	PGSC0003DMT400065023	4.71976	5.83802	3.51139	6.18825	5.22916	6.04953	5.18993	6.12946	5.6018	1.01482	1.23217	6.39873	5.95977	5.49118	4.78697	6.68796	5.65408	6.74136	5.96823	1.38825	0.680994	5.62974	6.76735	4.3781	7.23482	8.67543	5.54041	5.82094	4.78955	3.7163	6.5853	4.94055	5.69326	7.53149	5.05307	5.93434
MSTRG.1707	PGSC0003DMT400064988	0.170129	0	0.607498	3.14609	5.45349	2.3045	4.99891	23.5398	9.83937	0.150742	0.169	0	1.26685	1.49791	5.23618	3.61055	0.585018	3.29436	0	0.644194	0.716583	1.41969	3.08258	1.77376	1.90232	14.5873	0.498316	0	0.259571	0.374221	1.69597	1.53925	2.94314	16.5659	9.54042	25.9077
MSTRG.1706	PGSC0003DMT400064990	26.2826	27.7144	37.8	29.6729	33.5839	35.7423	24.4018	34.2894	25.6307	44.762	40.787	26.7487	17.9093	20.6626	22.9835	18.8061	11.9624	16.4323	26.7001	38.4013	39.6411	20.4296	21.7005	41.1347	17.5524	19.6266	17.5763	23.123	21.9792	14.2281	30.6419	34.4242	21.4656	23.5797	28.1985	40.0973
MSTRG.1714	PGSC0003DMT400065033	2.34499	0.769456	7.37261	30.9136	34.757	52.9509	13.9114	104.227	50.8905	13.4483	14.7918	4.01532	32.857	34.5923	72.6577	57.7742	14.144	36.3496	2.43171	7.78552	4.31454	55.8713	95.3131	69.8051	32.2796	33.891	33.8069	0.370576	1.44266	2.7265	28.0731	47.4924	62.9875	84.5515	76.798	104.131
MSTRG.1711	PGSC0003DMT400065014	0	0	0	0.416926	1.14044	0.146088	0.450567	2.33776	5.13817	0	0	0	0.121588	1.4025	0.405964	1.82195	0.076812	0.167402	0	0.323146	0	0.559658	1.94554	1.92273	0.630499	0.204938	0	0	0	0	0.693435	2.67064	1.06166	1.80213	2.45913	3.30483
MSTRG.1712	PGSC0003DMT400064983	0	0	0	0	3.40273	4.1357	6.22426	6.3311	11.5424	0	0	0	0	0	4.69178	0	1.87902	0	0	0	0	3.53887	3.93962	2.05768	1.79366	7.51359	0	0	0	0	7.28067	0	7.12487	4.753	10.543	9.63658
MSTRG.1715	PGSC0003DMT400065013	2.7202	2.55575	4.25405	12.0712	22.3505	30.4477	7.94608	29.5078	24.4636	7.71148	4.27531	2.98688	10.6764	11.0185	43.9434	6.83707	4.47773	6.03492	3.03077	6.28646	3.82397	13.4307	40.6188	30.0778	6.01371	20.2824	3.0261	2.5878	3.07523	2.41818	22.9456	15.9755	37.8646	28.2106	26.8549	34.8744
MSTRG.1717	PGSC0003DMT400064978	0.147519	0.500511	0.354721	2.44403	5.21349	1.25489	0	0	0	0	0	0	2.28137	5.06572	0	4.92844	1.7183	0.742222	0.27007	0	0	2.07606	1.36042	0	4.20761	0	6.52736	0.419624	0.181511	0.109132	1.56632	1.82772	0.613752	0.879606	0.828739	0
MSTRG.1716	PGSC0003DMT400064979	5.09468	7.63603	0.486229	6.04578	3.49311	3.76807	3.02668	7.91946	6.51954	0.861026	1.63334	10.5551	6.39963	6.38257	5.92339	18.2799	12.493	10.4503	1.20275	1.50986	0.877107	4.72656	5.27724	2.06126	10.3622	3.92023	10.694	6.14603	3.30042	2.43719	3.46102	2.3045	4.27969	12.3376	7.21877	12.0218
MSTRG.1719	PGSC0003DMT400016171	0.489861	0.756848	0.934772	1.36463	1.84005	0.42105	1.58024	0.203986	0.344361	0.823423	0.292549	0.948044	1.06836	4.38274	0.597025	1.92984	3.10303	3.94185	1.25073	0.469034	1.39206	1.44646	2.95866	2.44027	3.13506	2.45172	3.875	1.22041	1.20345	1.20611	2.58244	1.78441	2.03576	1.60018	2.11986	2.08397
MSTRG.1720	PGSC0003DMT400016166	8.11939	11.9712	17.1854	12.3582	8.42879	11.8347	7.36688	11.2127	9.44237	25.2939	19.5085	7.26448	6.56384	6.98775	6.64371	6.74102	6.10493	5.17239	6.46987	18.6185	16.389	7.65862	9.6839	9.85984	7.03905	9.60169	5.32036	10.4703	9.16391	9.07632	11.6609	10.1907	9.29172	11.7723	8.90286	8.62389
MSTRG.1705	PGSC0003DMT400065020	0.629125	4.48337	0	0	0	1.13303	2.89219	1.13929	2.16233	2.21514	2.8336	3.88336	2.05437	4.22703	2.11553	10.5621	0	3.37579	1.12477	0	0.485056	0.764614	1.34099	0.42569	1.75387	3.4142	8.52999	2.15623	0.691117	0	5.08349	1.48816	2.21512	1.69497	1.48602	0
MSTRG.1723	PGSC0003DMT400016201	2.28553	1.00221	2.34958	61.4295	72.9172	47.1666	102.648	57.2059	53.4955	1.28483	0.61881	2.44625	43.4964	73.5645	52.6835	48.9423	54.0998	45.411	4.61083	0.85774	2.12151	41.7013	34.9201	101.641	29.8824	10.4704	56.5951	0.526789	0.620368	2.44757	71.4938	135.373	72.9414	38.1125	91.6852	56.933
PGSC0003DMG400006316	PGSC0003DMT400016161	1.15034	1.11624	0.387701	1.18634	0.609167	0.546776	0.451806	0.753598	1.0256	0.064063	0.193203	0.474698	0.395597	0.840075	0.60541	1.09496	0.650626	0.951965	0.739365	0.198611	0.249804	0.658783	0.765964	0.576434	0.995136	1.24813	0.955132	1.04525	0.582262	0.391357	0.967778	0.476977	0.840774	0.949203	0.840218	0.819683
MSTRG.1727	PGSC0003DMT400016200	21.8858	29.1835	25.2718	16.409	17.1953	21.5394	21.4626	20.5456	19.3241	25.1255	23.9823	22.7801	15.8531	19.0615	17.453	19.6717	17.0009	21.7968	18.842	26.6406	24.3797	19.1722	16.12	16.9117	18.7146	23.7684	13.6035	26.0437	20.0789	15.4775	18.1052	18.2185	18.6376	18.0664	20.7695	21.7954
MSTRG.1729	PGSC0003DMT400016198	3.77261	9.35271	1.39146	1.28932	0.912025	3.10604	2.35849	2.33332	1.73104	1.30875	7.61063	6.1895	3.23882	0.311485	0.844108	2.24662	3.61359	1.90116	3.39445	1.75326	1.60698	1.24955	2.09726	1.90323	3.42596	4.25159	3.25942	4.42219	3.6854	8.85226	0.74792	1.53878	1.52056	1.74454	1.06831	2.49804
MSTRG.1731	PGSC0003DMT400016152	4.94405	4.97075	5.06854	0.956772	0.607444	1.79578	0.78377	0.526386	1.05986	3.72785	1.99007	5.65136	1.69365	1.52638	2.15338	1.37774	2.81628	1.96277	5.17324	3.77436	4.18809	0.90234	0.106545	1.50836	2.43857	2.39013	1.96704	6.05828	8.84958	10.8279	1.80192	2.2038	1.78357	2.01231	1.56249	1.80198
MSTRG.1730	PGSC0003DMT400016155	22.0292	28.7707	27.4931	8.07001	7.4355	10.3616	7.72327	11.0504	10.727	35.8079	37.3497	25.9643	7.75085	5.18366	9.08064	8.63292	7.67821	8.48936	13.675	32.2354	25.2952	8.24529	8.63238	7.18328	7.57293	12.489	8.25847	25.2856	14.8452	13.4612	7.52897	8.82733	8.44889	14.017	9.67859	13.4385
MSTRG.1733	PGSC0003DMT400016150	0.255741	0.387478	0.48828	0.77964	1.40331	2.50932	2.59328	0.565147	1.70577	0.82123	0.509792	0	1.44839	2.45026	2.36428	1.4273	1.21321	2.29333	1.52764	0.624386	0.749806	2.0798	3.19277	1.54062	1.94747	0.199228	0.580507	0.211603	0	0.124436	1.90262	1.82983	1.97553	1.16423	2.23837	1.42535
MSTRG.1732	PGSC0003DMT400016195	43.3467	38.0019	47.9256	44.1872	41.9284	46.3073	35.5896	33.5134	39.2906	48.4867	45.4304	46.7835	35.3768	41.329	37.8463	41.1453	36.5751	47.1979	37.7976	42.9104	39.9241	44.8515	37.8275	45.1055	36.4746	40.2253	33.7799	39.8777	38.5323	34.6719	46.207	45.9342	46.7746	31.792	35.4717	33.195
MSTRG.1735	PGSC0003DMT400016146	8.83483	12.8628	7.25011	13.0437	12.5267	0	19.3251	24.7319	4.89227	7.41621	9.57463	11.5581	8.76644	10.8087	8.6325	11.3603	9.64591	9.86196	5.36094	8.90353	6.07548	6.06838	8.41804	8.49573	8.27795	15.5514	10.3686	8.28971	5.18658	4.70858	10.8535	12.2914	9.22218	4.33448	20.5598	5.22713
MSTRG.1736	PGSC0003DMT400016145	0	0	0	12.4968	12.9877	0	10.0208	0	18.8588	0	32.7652	0	0	0	6.98765	21.1545	0	11.8742	0	41.7719	40.2044	15.5435	0	0	8.78232	15.8709	18.2527	0	0	7.18642	8.5854	4.41451	0	21.8548	11.4853	0
MSTRG.1757	PGSC0003DMT400074554	34.9209	37.9454	27.0651	14.5912	12.9425	16.4247	18.8802	14.6551	17.4844	23.1263	21.4852	35.578	17.4542	15.7761	19.3439	21.5376	20.193	26.525	26.2268	29.995	22.4983	18.5488	17.3373	14.446	20.0805	27.772	20.5527	26.102	22.6664	29.0962	15.5696	13.5662	19.1876	15.791	15.368	16.9966
MSTRG.1763	PGSC0003DMT400074561	0.572943	0	0.347902	0.584174	0.499584	0.447956	0.542592	0	0.724209	0.512781	1.21876	0.283132	1.05002	0.627677	0.810189	1.86959	0.230332	1.43197	0.599376	0.796859	0.958573	0.571299	0.87043	0.415172	1.29335	0.452359	0	0	0	0	0.300479	0.283644	0.701834	0.377681	0.339524	0.856001
MSTRG.1762	PGSC0003DMT400074541	3.2831	5.06091	9.17939	5.97033	5.39015	6.0485	4.21392	4.0795	4.742	6.31412	7.30792	3.968	8.11406	6.71783	5.25135	5.01663	4.80124	6.98504	4.66747	3.8175	7.8331	6.65408	5.85586	5.4159	5.82199	4.23409	9.69165	2.96141	6.47596	10.0075	5.1746	5.58428	5.57903	6.72305	4.11017	4.47657
MSTRG.1760	PGSC0003DMT400074536	7.75177	10.3947	11.0932	17.6246	29.3938	20.7604	10.4401	18.3064	15.5847	11.9485	9.40674	9.06728	23.4295	16.0185	12.6643	16.6557	14.0694	15.2402	12.3455	6.66845	21.2372	13.2341	19.7334	16.1713	11.0226	4.91612	12.5763	6.71891	12.2198	9.67713	23.9095	21.4905	14.5419	16.4611	10.0549	19.9293
MSTRG.1765	PGSC0003DMT400074569	5.86745	6.11371	3.8109	0.270687	0.45372	2.02586	0.754258	6.90956	1.20753	4.00128	8.68944	3.64193	1.76372	2.96512	5.34447	0.500756	0.426911	0	4.32586	2.9539	1.52178	0.608857	1.20186	2.25722	0.196355	2.60333	1.05432	4.52595	3.28966	4.45702	0.696161	0.51521	0.881583	2.84674	2.70153	10.9085
MSTRG.1769	PGSC0003DMT400074565	0.506255	2.65786	6.02577	0	1.29066	0.752365	0.237321	6.6778	1.52654	9.02511	8.24242	5.43891	0.717596	4.75861	1.41033	0.709015	0	0.589479	0.52961	14.7708	10.326	0.166584	1.1498	1.08227	0.382273	0.890345	0.487646	4.08655	0.931245	4.20709	0.657124	0.610381	1.19829	3.29722	2.07903	4.62814
MSTRG.1759	PGSC0003DMT400074559	29.2874	33.599	42.9162	196.763	98.8283	209.959	193.576	229.525	231.892	47.659	50.3294	34.2973	78.1014	183.673	65.0423	110.218	89.3498	94.1366	32.5587	39.8573	46.4306	114.066	167.631	117.418	79.6686	3.93332	74.1332	28.7294	35.7854	27.8214	197.793	222.317	188.828	123.645	46.9502	194.711
MSTRG.1770	PGSC0003DMT400074566	16.7605	23.5829	27.5627	11.9422	7.54728	12.1438	13.5268	10.2045	10.2947	46.6085	56.0787	18.751	13.771	15.207	12.9241	16.5554	14.6974	23.525	9.95781	51.8132	43.6842	11.6704	12.0005	7.95706	16.6018	18.2072	12.5245	19.1878	14.1565	20.7524	13.0078	10.8822	14.0219	13.6273	14.1498	9.76372
MSTRG.1758	PGSC0003DMT400074555	65.3957	38.8716	75.5435	9.37876	2.46988	23.3267	41.7666	28.7391	33.7857	25.2419	49.7491	50.35	33.4269	3.15708	15.7229	55.6944	41.5197	43.7639	54.9305	51.7746	46.1928	31.0411	29.0856	9.87118	16.5938	4.89667	19.8568	7.00769	48.9396	0	12.1127	15.0287	35.5956	1.61858	20.4828	2.33942
MSTRG.1772	PGSC0003DMT400074570	3.31473	13.2802	15.0094	3.05984	2.98321	5.91167	4.46654	9.44601	15.1315	33.2732	47.8763	4.51747	31.1572	19.5037	33.8134	7.98503	7.37289	15.6787	1.66627	16.1496	12.6995	34.38	39.6407	29.2094	10.8627	10.1983	10.0174	4.27676	4.25728	4.48859	12.8499	5.6597	12.1301	30.3363	22.5086	14.7292
PGSC0003DMG400028978	PGSC0003DMT400074550	0	0	0	0	0	0	0	0	0	0	0	0	0	0.33083	0	0	0	0	0	0.368323	0	0.443326	1.49337	0.767156	0	0	0	0	0	0	0.358262	0	0	0	0	0.342889
MSTRG.1771	PGSC0003DMT400074548	183.643	181.428	186.13	258.247	220.015	219.634	257.995	222.746	271.991	150.817	157.911	195.576	226.824	244.516	222.575	208.883	163.85	239.745	181.136	157.206	111.308	239.412	229.408	244.319	192.81	187.565	192.781	167.426	184.739	193.848	228.077	228.309	237.214	182.719	257.299	222.65
MSTRG.1774	PGSC0003DMT400079936	0	0	0	0	0	0	0	0	0	0	0	0	0	0	0	0	2.12719	7.42451	0	0	0	0	0	0	0	0	0	0	0	0	0	0	0	0	0	0
MSTRG.1773	PGSC0003DMT400074549	14.9054	20.3112	59.9098	22.4325	22.4001	20.8106	10.943	7.87286	6.82824	43.5141	27.4239	39.2355	23.5962	17.7793	11.2105	17.7466	15.0408	15.5645	16.771	44.0629	43.4715	11.5049	2.73801	20.0337	15.3071	7.08716	13.5442	20.3485	15.8035	27.3991	11.6183	0.243735	7.09345	3.14409	10.7477	0
MSTRG.1776	PGSC0003DMT400079897	0.702402	1.20888	2.95571	6.37825	7.90517	0.869891	0.977275	0.350288	0.670699	5.33611	4.4385	0.274906	1.593	5.80926	0.988262	0.524651	0	0	0.404144	5.34443	4.60927	0.947158	0.283607	6.25765	0.317512	0.488633	0	0.886225	2.0324	1.75841	3.1232	7.87522	3.12707	0	0	1.50206
PGSC0003DMG400031116	PGSC0003DMT400079894	0.212736	0	0.51154	0	0.082167	0	0.535441	1.06685	0.35805	0	0.283657	0	0	0.158822	0	0	0	0.165415	0.147869	0.294883	0.120274	0	0.21618	0	0	1.19356	0.273652	0	0.263512	0	0	0	0.104305	0.431094	0.16837	0.668314
MSTRG.1775	PGSC0003DMT400079934	39.8594	41.4307	114.229	75.8287	68.7752	75.8379	85.7539	85.4335	87.4591	138.291	136.152	40.4312	68.4243	64.7424	70.7855	59.9954	61.9307	73.1697	43.7936	154.803	155.463	66.2753	77.2747	69.8018	59.1638	83.8845	63.7639	34.2044	41.0319	40.7566	79.3702	82.2561	82.8685	75.9233	84.5316	83.6801
MSTRG.1777	PGSC0003DMT400079931	9.93148	8.19371	12.7342	7.25871	9.52454	8.42527	18.1472	12.3168	11.1039	13.4472	13.693	9.67973	6.98905	9.33909	7.79376	6.81227	8.8164	9.42936	10.3548	12.6989	10.8626	5.40998	6.73254	7.55394	8.62722	13.792	9.14548	9.37976	7.07205	7.4777	7.03674	8.52898	7.73818	8.40316	13.3489	20.6805
MSTRG.1778	PGSC0003DMT400079929	121.043	70.8217	167.068	29.2239	15.8183	29.9607	15.7749	23.1331	15.7072	87.1823	116.892	122.772	30.0244	47.9444	15.7926	78.2811	51.1196	45.1427	218.745	140.542	144.044	27.0038	21.8698	18.3072	32.0274	28.4803	68.2336	113.065	206.554	168.457	24.6453	28.6443	44.2263	42.0125	15.6006	34.6632
PGSC0003DMG400031114	PGSC0003DMT400079889	0.30065	0.68315	0.59235	0.87272	0.350045	0.868975	0.323425	1.03495	0.583855	1.48362	0.950341	0.168343	0.451615	0.36247	0.744849	0.565474	0.340296	0.395605	0.450419	0.504897	0.79554	0.611878	0.852994	0.828649	0.594165	0.518903	0.683258	0.247171	0.370996	0.334695	0.747109	1.26485	0.760805	0.565555	0.463433	0.406734
MSTRG.1779	PGSC0003DMT400079893	23.7438	23.6994	27.4571	19.9937	19.6238	20.177	25.3997	24.7021	28.9275	34.8206	32.2044	23.4584	31.2267	27.3297	39.5777	25.7569	18.8937	28.6973	16.9739	25.8636	36.3863	39.5853	44.9734	34.6593	23.9748	29.8729	22.2962	18.0008	17.4798	22.1696	26.6807	22.9155	25.1751	36.4044	23.0097	25.3819
MSTRG.1780	PGSC0003DMT400079921	5.48591	3.37975	2.34355	13.6746	3.29396	7.04444	10.0178	26.2255	10.2677	11.6833	9.85068	5.00931	10.4014	10.1847	16.3998	9.62192	3.78672	5.14212	3.20253	9.02768	3.14755	7.79094	13.8915	11.5825	7.1959	12.886	6.86451	4.04846	3.3714	0	10.402	5.77283	3.49256	9.02	5.94437	16.3084
MSTRG.1781	PGSC0003DMT400079915	3.90777	2.9424	3.49295	4.04725	2.24228	3.96823	3.07453	4.19526	3.05314	3.50909	2.34848	4.19236	3.74101	1.98273	1.82835	5.36191	3.85755	1.72606	3.51046	2.66298	1.83864	2.9196	2.18746	2.87617	3.13442	2.8564	2.12653	5.48053	2.37823	0.954643	3.9526	3.57613	1.54816	4.31552	2.5838	4.50004
MSTRG.1782	PGSC0003DMT400079916	3.46823	1.45773	2.98434	1.13573	0.941227	1.16269	2.30126	2.13652	2.81851	4.11618	2.93245	1.29952	1.46879	1.8419	1.98483	0.541503	1.37571	1.78958	3.3643	3.59754	3.91017	2.50001	3.31647	2.27169	3.06777	1.98558	1.37383	4.02537	2.36824	0	1.90009	2.08072	1.30922	1.93282	2.69795	2.60451
MSTRG.1783	PGSC0003DMT400079887	47.2535	42.1441	21.0275	29.7898	25.597	27.6259	27.9641	22.3725	28.4766	18.0942	11.0799	43.0083	35.593	27.5737	30.4334	37.9448	36.2194	49.1576	44.1022	17.8492	17.3101	31.2117	29.4638	24.6883	36.9047	45.4912	32.4087	40.7564	28.2193	33.1437	17.7716	27.1925	37.9667	21.404	25.567	21.6579
MSTRG.1784	PGSC0003DMT400079885	30.9801	60.3317	13.9747	62.2145	81.9781	82.2182	76.3521	93.2567	72.4261	68.7306	68.4914	33.4531	65.513	26.0396	70.0782	59.1084	63.9932	62.7196	28.3881	56.5388	71.6967	19.0005	77.6341	80.3664	37.3564	54.3267	45.2159	37.5903	30.4529	55.7809	76.4863	77.6731	84.0863	64.1102	69.8282	101.714
MSTRG.1786	PGSC0003DMT400079910	3.3205	5.05014	7.54474	18.3753	16.9242	17.4349	17.6443	16.4821	16.5293	5.20293	4.73968	3.03134	10.9831	17.5	15.2522	5.56878	6.48142	7.71258	4.98741	6.14919	8.33264	13.7201	19.2246	21.2598	7.99415	7.57742	7.71695	2.73445	6.11	3.64173	22.239	21.4131	18.5858	8.65996	16.7992	10.6248
MSTRG.1785	PGSC0003DMT400079883	11.1881	9.28042	13.3385	7.41783	7.56161	5.30121	4.56677	3.12258	3.85111	4.67001	2.16274	14.3293	8.05131	7.10715	6.31056	6.28059	4.93746	4.7369	17.419	5.3425	8.8674	7.32031	5.82901	6.85762	5.38014	6.47208	6.57369	15.1923	20.7663	12.4188	6.26596	7.21368	5.81645	3.75925	3.96612	3.89558
MSTRG.1787	PGSC0003DMT400079907	7.34912	5.46174	3.96082	3.57847	3.52533	5.4999	2.32688	4.75128	5.23418	2.84413	3.54979	5.40208	4.23433	5.6682	5.88501	4.70185	3.85195	3.39948	7.62726	3.08217	2.08652	6.46495	7.80325	4.43278	4.83446	3.27629	3.91832	3.33521	4.53557	4.25713	4.58825	4.09576	4.72695	3.31835	3.46569	2.44108
MSTRG.1789	PGSC0003DMT400079899	1.13168	0.421624	0	1.23319	1.19979	0.898694	1.1803	2.46615	0.83785	2.44161	2.34893	0	2.77639	0.78007	2.0531	5.2379	3.05047	1.4046	0.178618	0	0.705044	1.17431	1.67917	1.44564	4.52871	0.781176	2.50758	2.29225	0	1.41042	1.07025	0.783198	1.23552	1.87337	1.18569	1.79778
MSTRG.1788	PGSC0003DMT400079902	160.851	178.764	132.306	47.3053	31.7496	56.7964	107.589	121.395	81.1985	209.798	221.471	178.897	45.5687	58.8531	63.0977	88.6837	69.2536	95.9951	40.8356	311.797	207.456	32.9843	29.9206	44.4194	66.1488	155.079	61.704	115.778	92.1312	122.59	46.3487	47.7854	73.0512	49.3184	82.6455	95.3819
MSTRG.1793	PGSC0003DMT400054099	2.26151	1.79136	2.26633	2.31802	2.31236	2.30873	1.89528	1.86685	2.22852	1.93413	1.65306	2.20466	2.4634	2.42064	2.07006	3.23714	2.25442	2.58241	2.46647	1.89032	2.71659	2.18823	2.4394	1.53797	2.96497	1.83208	2.57611	2.25846	2.38335	2.07559	2.46263	2.25756	2.20174	2.30346	1.91035	1.59842
MSTRG.1790	PGSC0003DMT400079876	8.13087	15.9365	11.0759	0	6.81858	1.47616	0	18.8097	0.639113	10.8978	6.71067	6.75131	9.93187	15.7385	9.90883	9.13603	0.375256	10.8869	7.17464	0	2.12503	10.7674	10.7984	2.82195	10.9065	0.85281	15.5122	9.46595	2.87006	0	5.19093	6.06341	15.3705	3.88739	10.8446	15.1889
MSTRG.1804	PGSC0003DMT400004465	0.862258	1.01826	2.93002	6.78747	6.69045	3.92241	7.60951	7.84193	8.07001	3.80084	1.64054	0.255144	6.3427	6.11717	8.15041	6.8804	2.7094	5.9461	1.6118	4.34208	4.08961	6.57247	5.95754	5.13075	4.88502	5.7417	6.54487	1.74174	1.65558	2.01572	9.46552	7.37367	6.73332	4.60996	7.75625	4.11826
MSTRG.1803	PGSC0003DMT400094749	8.44341	13.2965	32.0708	52.0892	55.2915	51.0414	40.4232	32.2811	38.5599	46.6196	32.0907	17.2978	30.4993	42.2879	41.494	28.9568	22.8145	21.4075	27.4042	32.6645	43.0014	51.3856	43.2512	49.6331	29.0404	13.2403	28.6605	13.3484	18.3501	14.7084	60.4419	55.8912	34.7264	32.0991	38.6926	31.0579
MSTRG.1807	PGSC0003DMT400004475	0	0	0	5.34397	0	6.68664	5.15824	0	0	4.04358	2.99911	0	0	0	0	0	0	0	0	0	0.619572	0	0	0	6.46257	0	6.92645	0.422418	0	0	0	0	0	0	0	0
MSTRG.1794	PGSC0003DMT400054093	0	1.3375	0	0	0	3.87083	0	0.051604	4.929	0	0	5.19623	0	0	4.87852	4.98598	0	0	0	2.8973	0	0	0.045912	0	0	4.11639	0	6.14985	4.36638	6.17433	0	0	0	0	0	0
MSTRG.1802	PGSC0003DMT400004463	0.217021	0.039427	0.784918	1.19728	0.804144	1.15326	0.427702	0.361373	0.722276	0.473026	0.142248	0.040263	0.326541	0.421362	0.362246	0.887456	0.967218	0.328147	0.409717	0.447913	0.719768	0.729866	0.518744	0.211916	0.999712	0.84042	0.620085	0.446498	0.322298	0.29682	0.502829	0.549711	0.410806	0.810075	0.547501	0.438599
MSTRG.1794	PGSC0003DMT400004523	3.94369	4.35228	3.16457	2.32677	2.89936	2.64323	2.74463	2.25176	3.6325	3.12619	3.38503	4.23044	3.9966	3.53204	3.55266	3.51255	3.39308	4.06058	4.90735	2.30821	2.65334	3.41429	4.60926	2.71549	3.90397	3.15104	4.42189	4.53188	3.99089	3.84181	3.10855	3.28797	3.35213	2.94242	2.87487	1.8663
MSTRG.1795	PGSC0003DMT400054110	1.22391	1.66709	0.816615	0.599728	0.28893	0.442528	1.2387	0.725769	0.312676	0.739633	1.35299	0.98248	1.08619	1.28653	0.442333	1.51953	1.1291	1.56881	1.27692	0.516396	0.392982	0.846631	1.02872	0.990027	1.32881	1.28008	1.26673	0.755435	0.919961	1.53985	0.760494	0.884479	0.959718	1.07054	0.655889	0.66852
PGSC0003DMG400001784	PGSC0003DMT400004480	0.480763	1.18297	0.907786	1.09317	0.725762	1.16103	0.711696	0.737774	0.790453	1.56311	1.04764	0.79226	0.478218	0.61867	0.501619	1.27197	0.736358	0.618132	0.715765	0.487067	0.606913	0.653099	0.883737	0.721244	0.991224	0.788749	1.18483	0.955199	0.246579	0.218137	1.30587	0.972772	0.686543	0.393229	0.78332	0.877184
MSTRG.1811	PGSC0003DMT400004479	6.70204	6.23998	7.34644	4.59083	4.2908	4.73757	5.36589	6.63359	5.66176	5.70368	9.81076	6.12456	4.10138	3.83628	5.27741	4.22587	3.60293	4.68186	3.3158	7.72581	7.76866	4.08176	5.60609	3.83325	4.75345	4.75408	3.82183	5.8403	4.79072	3.51219	5.50718	5.11758	5.48182	5.7814	6.2735	5.30173
MSTRG.1810	PGSC0003DMT400004532	10.0865	11.6137	14.6228	26.1746	26.9712	32.4087	27.5221	29.3513	33.1627	17.0591	13.2514	5.97783	23.3124	27.3095	32.4274	15.6189	13.2653	13.7556	11.5149	13.5609	16.2143	28.8809	33.3232	40.3821	15.9503	15.5382	12.4538	8.05203	9.24883	7.18124	39.1725	37.2697	27.3049	27.0088	28.5891	29.823
MSTRG.1808	PGSC0003DMT400004477	3.36532	4.19067	0.535276	0.232699	1.69861	0	0.718677	0.448786	0.785115	0	0.880088	5.54559	3.87455	0.618236	1.1774	2.83365	1.34765	0	0.543	0	0	1.69474	0	0.803153	0	1.72882	0	0	1.1241	0	0.70695	0.422618	1.13931	2.43226	0	0.782576
MSTRG.1809	PGSC0003DMT400004531	8.59445	18.2969	20.3761	14.6157	15.3855	15.3209	17.39	36.052	35.601	29.6059	27.1161	14.2266	11.5679	9.96324	23.8462	9.96045	8.27476	12.0638	4.78289	21.2426	30.997	13.8059	25.0244	16.7324	10.0569	21.7661	10.0437	12.3801	8.99501	11.292	13.8669	13.7025	16.1598	21.3501	28.8385	33.6584
MSTRG.1815	PGSC0003DMT400094197	5.50076	8.50211	1.54289	3.61271	3.43285	6.36917	2.0617	2.67998	1.37413	3.03406	3.37591	2.88988	2.36442	3.03078	2.84444	3.90762	1.83765	3.03357	4.00726	6.16667	3.28512	2.1538	4.10095	5.0919	2.48883	2.13721	3.22627	2.60071	2.76919	5.00601	4.05802	5.9293	3.08813	2.93749	0.901872	3.83064
MSTRG.1816	PGSC0003DMT400004486	0.890207	1.16758	0	2.84528	2.8296	1.6941	6.96156	3.89156	3.26861	0	0.492594	0.19486	2.60835	3.94003	1.95721	6.51647	8.46348	6.23901	1.86776	0.408579	0.304375	1.97594	0.999104	2.7964	4.20373	0.892738	8.82164	1.0071	0.245041	0.475881	1.80847	2.18037	1.85209	4.52544	3.79706	2.65698
MSTRG.1814	PGSC0003DMT400004485	1.48455	0.703884	0.280147	1.13965	1.34096	1.51538	0.613719	0.640913	1.5	1.20895	1.16925	1.811	1.01809	1.25591	0.735955	0.942	0.619521	1.17897	0.648983	0.864107	0.580245	0.804276	1.02327	1.8824	1.00314	1.23267	1.39895	1.99905	0.800996	0.118473	1.63324	1.17087	0.954672	1.39522	0.604998	1.16438
MSTRG.1817	PGSC0003DMT400004487	27.446	25.6182	35.8244	45.6168	46.6603	37.4208	61.6609	47.2684	45.5187	28.5585	23.8742	25.5333	44.7576	51.5802	39.8335	47.6391	47.4328	53.9608	24.082	24.1252	26.1372	56.1822	43.2885	42.8643	41.785	38.3551	39.2666	20.1071	30.337	34.7022	41.1109	49.0767	46.8265	36.991	43.7752	38.5587
MSTRG.1812	PGSC0003DMT400004540	0.055299	0.035035	11.3733	33.6924	18.5608	56.4132	94.1549	7.37876	112.716	11.0108	14.076	0	24.8586	21.2739	37.0999	22.3895	14.5828	23.4688	0.020497	14.2347	12.3265	25.0498	21.9969	25.9996	14.0197	4.17134	9.66167	0	0	0.029561	44.7832	17.9604	41.8644	31.4418	58.4851	108.234
MSTRG.1818	PGSC0003DMT400004544	86.5445	93.7652	92.382	116.572	99.7397	99.8633	134.047	108.951	121.004	74.0099	74.992	96.6452	55.6601	109.182	45.5447	112.829	168.499	140.479	88.9413	58.1587	58.5994	49.0426	129.253	78.676	127.497	129.948	101.436	58.2372	106.432	119.319	93.7006	115.713	118.827	105.881	115.424	82.1631
MSTRG.1819	PGSC0003DMT400004488	3.0272	6.6095	0	0	5.24486	0	0	7.3113	6.73742	0	0	0	0	5.57274	3.83218	0	6.06051	0	0	0	18.5895	5.08357	1.93511	9.99543	0	0	5.05694	0	0	4.24354	10.651	0	0	2.18933	4.9522	12.5944
MSTRG.1820	PGSC0003DMT400004493	1.70266	1.56568	1.01391	1.6761	0.966697	0.446218	1.80553	0.943802	1.35081	0.647135	1.37536	0.581389	1.02398	0.40286	0.874221	0.706549	0.631251	1.09387	1.72016	0.223163	0.235284	0.691454	1.33695	0.711788	1.07484	1.20699	1.6353	0.424988	1.68036	0.970178	1.87083	0.918891	0.490295	1.50793	1.4945	0.693983
MSTRG.1821	PGSC0003DMT400004496	0.906182	0.847661	1.2046	0.711248	0.579015	0.841824	0.507079	0.732941	0.796017	1.29925	0.947716	1.25644	0.911075	0.837992	0.792575	0.704933	0.363661	0.482101	1.19926	0.805992	1.02345	0.699163	0.801117	0.715346	0.822806	0.58949	0.534905	1.10952	0.696477	0.575733	0.863805	0.717031	0.549118	0.529076	0.720146	0.596156
MSTRG.1822	PGSC0003DMT400004550	18.1238	25.5069	28.4153	34.979	35.1835	33.4648	30.911	35.8468	42.6445	36.6087	31.9479	17.0943	25.3404	32.1421	36.7013	21.0911	19.146	25.9342	16.0453	27.9087	28.6266	32.9753	37.2743	35.6647	25.0624	31.2538	24.1919	17.521	15.3407	15.3804	33.43	36.4078	33.3474	37.5779	33.6632	40.292
MSTRG.1824	PGSC0003DMT400004553	0	1.80833	0	36.8485	21.7764	39.5287	42.8004	104.652	82.3606	0	0	6.71166	24.8918	29.5624	38.9958	98.0309	54.9548	74.28	4.48352	15.1553	11.3841	8.07649	47.6077	31.4185	55.2983	49.1375	50.2276	0	0	0	32.5464	41.3036	57.6428	68.3974	92.8668	111.061
MSTRG.1826	PGSC0003DMT400004563	0.39085	0.257788	0.580901	0.892147	1.0105	1.05658	0	0.808074	0.97917	0.94322	1.07307	0.382429	0.369343	0.16386	0.069085	2.55082	2.39666	2.65172	0.35957	0.324522	0.30743	0.547402	0.644336	0	1.70404	0.11514	2.60423	0.372458	0.240455	0.193733	0.606755	0.336917	0.710253	1.1083	0.577297	1.50037
MSTRG.1825	PGSC0003DMT400004562	3.89987	3.9538	21.7705	11.5137	2.71845	2.67416	9.71609	3.06401	9.29028	16.5643	5.38833	2.42291	0.263408	7.92972	1.71453	0.115865	13.8011	8.26983	2.22118	0.271165	0.184565	0.233451	0.100097	0	0.363149	5.33415	8.4903	3.69798	11.1057	9.07351	1.68592	5.953	0.043777	2.15609	1.74594	6.30542
MSTRG.1828	PGSC0003DMT400004512	0	1.55288	0	0	0	0	0	0	0	0	0	0	0	1.70761	0	0	0	0	0	0	0	0	0	0	0	0	0	0	0	0	0	0	1.94189	0	0	0
MSTRG.1830	PGSC0003DMT400004514	3.49895	2.09962	3.73905	3.24419	1.78616	3.28474	2.72072	4.22399	3.12378	7.33401	7.20767	4.11357	2.72848	2.01666	3.27074	2.42199	2.22213	1.80696	1.35577	7.28388	7.63943	2.00971	3.07729	2.92197	1.50573	2.31623	1.71751	4.12237	2.41751	2.91779	2.38154	2.84353	2.18762	2.97397	4.04585	3.07934
MSTRG.1832	PGSC0003DMT400004592	23.19	24.249	18.0075	24.1261	29.1977	19.8827	26.0782	13.2474	31.0201	8.74198	14.015	35.5772	18.4972	19.059	15.5267	33.2508	32.477	36.0771	37.5002	12.7055	10.1265	19.2053	18.965	29.2481	21.5763	33.6619	33.0883	34.1675	16.309	7.41153	11.4824	21.4611	19.3467	22.0515	30.0903	18.026
MSTRG.1833	PGSC0003DMT400004521	15.1219	6.96557	4.88671	1.29664	4.47444	3.554	1.92803	0.748447	0.417386	1.48616	7.24868	2.61308	1.77213	1.58666	1.53657	2.38288	2.21306	1.30859	3.97049	2.5647	0.4079	1.8785	1.90005	2.47513	0.919751	1.13793	2.87344	6.08244	1.00153	1.05114	0.886455	3.51777	1.97678	2.75449	1.85333	0.825072
MSTRG.1836	PGSC0003DMT400004595	115.251	184.552	137.661	224.717	252.5	208.253	185.992	114.582	146.556	67.9889	76.1738	157.473	247.423	281.378	169.31	240.279	261.47	260.646	234.994	56.8587	54.4583	322.709	262.14	185.395	339.777	156.686	303.341	187.885	237.746	272.184	222.159	238.515	172.44	242.507	174.884	129.861
MSTRG.1839	PGSC0003DMT400004281	18.5071	14.9208	64.1388	27.1776	28.737	23.4722	43.1417	38.2769	34.5021	83.593	72.3912	16.3028	35.0552	36.9817	27.8852	35.7143	29.332	29.3309	18.0216	72.9062	64.0816	45.558	39.365	38.1098	32.6293	21.9238	36.4621	10.7166	19.5167	33.2791	31.7205	31.4158	43.252	30.473	36.9886	36.3204
MSTRG.1841	PGSC0003DMT400004191	0.909296	2.94223	0	12.6326	11.5187	9.22207	3.74355	6.02955	7.21948	0.537835	0.120595	0.947909	5.44465	9.83653	6.94621	10.5682	9.387	6.76906	1.74183	0.376106	0.552109	7.53813	6.41092	13.7638	7.44578	3.40473	11.8406	2.40531	2.16295	1.70401	9.3538	13.0625	10.7789	10.656	8.77903	11.8701
MSTRG.1840	PGSC0003DMT400004190	23.5838	23.937	47.113	60.0216	60.7384	59.5807	42.6414	48.8599	45.6914	74.8938	45.7871	24.0451	41.3389	47.7852	51.3027	38.8078	29.3757	34.8556	38.8065	51.6829	70.4948	42.4029	45.0869	64.4355	37.6731	34.2476	36.6849	28.4013	26.379	22.7027	63.909	60.5996	52.9009	42.6603	50.9114	49.914
MSTRG.1843	PGSC0003DMT400004283	2.11636	2.25264	3.68022	1.55669	0.967233	2.15909	1.25082	2.07239	1.62679	3.51887	2.54263	1.87517	1.63698	1.29402	1.49647	1.64835	1.17048	2.31595	1.6247	2.40468	2.77684	1.76225	1.8879	1.69828	2.07245	2.23126	2.34499	2.15261	1.63754	1.90134	1.61636	1.14748	1.64631	2.71903	1.10575	1.92187
MSTRG.1842	PGSC0003DMT400004193	0	0.169259	3.90865	0	0.279095	0.040816	0	0.109497	0.163146	0	0	0	0.347961	0.038138	0.097817	0	0	0.025201	0.063586	0	0	0.017266	0.754853	0	0	0	0	0.035154	0	0	0.121121	0	0	0.21814	0	0.08556
MSTRG.1856	PGSC0003DMT400004306	1.21605	3.40254	2.30603	0.744859	1.60164	3.74791	4.87656	5.56363	2.57635	3.31812	2.14689	1.73609	1.82816	1.75237	3.99447	4.16739	1.58393	3.57206	0.211061	2.42405	1.9113	0.63659	2.69491	2.28138	1.63896	4.09367	1.21698	1.64219	1.26841	2.29809	1.28571	1.60649	3.42459	1.81925	5.14263	4.47857
MSTRG.1857	PGSC0003DMT400004307	4.12651	7.55647	2.90259	3.18661	3.86513	4.33282	8.05673	15.2839	5.98984	3.80861	3.31027	5.06087	9.11878	4.5311	8.53363	8.30306	6.91072	8.94514	1.6077	4.14909	2.22466	2.31205	4.44091	2.92807	8.11525	8.02897	8.69727	5.68746	5.78181	7.28037	4.88504	4.8042	5.80844	6.9121	11.7184	12.0518
MSTRG.1851	PGSC0003DMT400004298	5.53227	5.35689	6.02703	9.14965	7.55574	8.50773	7.19834	4.95167	6.75594	8.50587	8.62913	6.57292	7.17629	0.077417	8.38951	3.4579	3.74055	4.31956	4.77784	6.93034	6.75946	6.84122	7.52222	11.6421	3.07404	3.4368	3.14158	5.59298	4.29094	3.79146	9.52983	7.42091	7.80298	0	5.22436	5.74192
MSTRG.1858	PGSC0003DMT400004308	19.8074	15.91	22.7021	7.73676	10.9973	10.1472	22.7002	33.582	14.5659	20.6211	30.2055	19.384	7.21982	8.0252	23.175	8.44351	7.30949	10.3146	1.08261	25.9994	18.8312	4.92011	9.8525	7.1377	8.44964	27.7098	5.9761	13.0435	15.1554	27.3784	6.0907	8.23501	14.9611	14.9649	19.4754	26.4987
MSTRG.1859	PGSC0003DMT400004214	9.2302	8.30719	10.1756	7.66787	3.97478	4.84591	7.48303	4.3521	2.42284	13.4259	8.44391	9.58822	4.83412	4.76693	4.94242	4.41683	2.7475	5.51802	8.86273	14.0552	9.3936	2.07549	1.51737	4.21905	4.86962	4.64624	4.01461	9.29467	14.3292	21.0241	5.74665	3.64435	8.77925	2.94373	4.81309	5.05333
MSTRG.1861	PGSC0003DMT400004215	0	0	0	0	1.6501	0	0	0	0	0	0	2.72268	0	0	1.5417	0	0	0	0	0	0	0	0	0	2.15675	2.88286	0	0	0	0	3.38431	0	0	0	0	0
MSTRG.1846	PGSC0003DMT400004200	89.6934	21.6255	42.2839	33.9475	150.718	45.9391	32.5772	162.252	43.2491	37.4335	25.9617	26.9483	34.1697	26.2914	42.6473	34.6283	27.5174	35.5099	26.1428	47.7092	44.3633	41.1829	161.456	56.1182	122.844	37.3249	21.3485	32.1997	25.9375	72.768	46.3189	150.232	40.4553	136.205	152.955	49.7385
MSTRG.1862	PGSC0003DMT400004217	14.2108	10.7539	5.13059	6.18921	5.16871	7.63563	6.1716	7.20455	6.94789	8.80565	7.49205	10.7688	7.12994	4.6849	4.15486	9.15735	5.29801	5.67387	6.3476	9.25458	2.9629	5.18797	4.54094	4.57267	5.61961	8.4153	5.24345	8.64856	6.23905	6.27743	6.80247	2.77718	4.36206	6.94734	5.94537	6.76269
MSTRG.1869	PGSC0003DMT400004222	0	1.46357	2.33129	1.56531	1.22564	1.24663	1.34221	1.05286	1.2974	5.43575	6.01702	1.33028	0.969236	1.9366	1.05884	1.67193	1.17271	1.37507	1.20866	6.73718	3.0999	1.10025	1.68614	1.25234	1.39361	1.57517	1.05132	3.21482	1.42143	0.81745	0.742349	1.50186	0.893011	1.4673	0.681405	1.43273
MSTRG.1872	PGSC0003DMT400004317	0	0	0	0	0.022367	0	0.828605	0	0	0	0	0	0	0.021617	2.21	0	0	2.8341	0	0	0	0.960965	0	0	0	0	0	0	0	0	0	0	0	1.95276	0.020153	0
MSTRG.1864	PGSC0003DMT400004221	13.444	17.1056	17.5634	9.16837	8.53486	10.1145	6.7941	10.2443	10.5207	19.7579	22.538	12.9613	7.14369	10.4296	8.77027	4.39139	6.78165	8.42325	7.1827	20.184	23.4921	7.67743	11.6323	8.40365	7.09776	8.94922	4.57173	11.3861	13.9241	17.6071	8.13692	8.99097	9.74978	9.01996	9.00101	8.9057
MSTRG.1867	PGSC0003DMT400004312	4.01345	0.527848	0.493386	2.4495	2.82534	0.895751	1.68519	1.86916	1.41754	1.6823	3.45958	0.196749	0.775582	2.32202	1.44009	1.44449	1.13021	0.823468	0.809955	1.96353	1.47311	1.41381	1.0494	2.41534	1.74708	0.907763	0.923684	0.819716	0.631166	0.371051	1.85511	2.27679	1.56045	0.878418	2.33458	0.921444
MSTRG.1865	PGSC0003DMT400004310	5.08978	0.103412	33.2907	36.7741	19.1615	26.0173	21.3461	17.3745	35.2196	90.3049	95.783	9.34164	0	14.2432	19.2704	29.8327	0	9.66735	0.198134	75.268	97.752	23.1087	0	29.315	4.18267	5.74987	0.189811	6.66667	7.37981	0.1095	19.5694	25.8301	0.226987	14.8111	13.0134	28.1795
MSTRG.1865	PGSC0003DMT400004314	9.78613	15.2335	21.7556	29.7155	28.7722	22.6052	9.01891	22.5125	25.5611	136.307	28.6854	0	13.6152	33.4207	5.28673	7.96253	21.1638	28.8739	26.3129	110.854	108.396	16.1983	0.345974	27.1085	24.0147	15.4449	21.5339	1.22186	17.8515	23.2505	8.90192	8.85784	28.4471	32.1378	24.7467	32.3104
MSTRG.1866	PGSC0003DMT400004311	1.10477	2.46477	0.528444	2.66399	1.81336	1.80986	2.09569	1.13135	2.08503	1.62268	1.39441	1.88103	0.841915	2.40444	1.37122	1.1424	0.688689	1.53882	2.06033	2.16111	2.23693	1.89776	2.38822	2.90409	1.1239	1.00861	0.35612	1.7396	1.34837	2.60175	1.53474	2.32838	1.8955	2.36534	2.34008	1.9811
MSTRG.1871	PGSC0003DMT400004315	1.25575	1.37443	0.600087	2.30421	1.67557	1.65897	1.75712	1.44461	1.42249	1.21454	1.78697	1.3885	0.823663	1.31574	1.48238	0.938027	0.647548	1.0637	1.4543	1.88339	1.85061	1.58631	1.59837	1.99303	1.199	0.62536	0.713332	1.18855	1.23842	1.17318	1.57265	1.95116	1.21287	1.59976	1.67516	2.26525
MSTRG.1870	PGSC0003DMT400004228	0.003323	8.77526	0	11.869	12.4117	13.1501	18.3489	0	13.3406	19.8377	23.3862	5.34532	14.9239	0	9.51983	14.3664	11.5519	0.048015	8.69521	20.4534	11.677	10.6519	7.09395	6.18356	0	0.038514	0	8.39171	0	0	0	13.9955	0	14.0271	12.7389	18.7902
MSTRG.1869	PGSC0003DMT400004230	0.48534	0	0.494203	0.166634	0	0	0	0.72128	0.164239	0.872317	1.28378	0	0.689353	0.163342	0.094067	0.373274	0.141914	0.373538	0	1.3951	1.30711	0.590702	0.503976	0.716919	0.144665	0.529629	0.087619	0.145906	0.280308	0.352648	0.675028	1.00175	0.755733	0.713755	0.459578	0.526099
MSTRG.1875	PGSC0003DMT400004234	1.80811	1.43287	7.51072	5.79632	4.33351	5.09727	6.29373	3.97222	2.83847	19.0691	14.2623	1.42907	2.70618	5.66785	5.67059	5.58239	3.82911	3.48307	0.859694	16.4242	18.449	1.81469	4.0263	5.27802	4.56808	3.44868	4.29396	0.818052	1.24772	1.04127	5.54914	6.30835	6.18383	2.59482	4.10623	4.58061
MSTRG.1876	PGSC0003DMT400004320	6.87587	1.73006	1.5312	1.06723	0.86619	0.966109	2.01661	1.34765	0.817074	1.77402	3.30012	2.27055	1.7731	1.48279	0.728632	3.20779	2.36726	4.26649	0.726871	1.00151	1.82405	0.686355	1.96331	2.73942	1.84063	2.43873	2.23675	6.22357	1.05084	7.0891	0.818001	0.811756	1.33025	0.963623	1.44402	2.48956
MSTRG.1874	PGSC0003DMT400004319	57.3745	51.9804	112.214	99.9494	97.8484	101.435	88.7329	112.548	119.343	141.2	142.991	62.3703	93.725	85.2298	99.5428	98.4609	86.523	97.3059	72.8384	132.939	133.37	109.938	99.8597	73.7742	97.1861	113.522	94.2601	64.2551	53.7473	49.7996	97.3797	90.6652	83.421	115.577	121.217	107.525
MSTRG.1878	PGSC0003DMT400004235	23.8143	22.1008	60.283	94.0726	58.4974	77.1497	115.396	101.35	70.9634	55.2119	59.1468	21.8444	83.8648	107.045	100.571	69.3612	76.2973	59.9371	31.1134	63.5443	29.5571	62.6275	80.669	109.625	33.8197	35.8277	49.1453	19.9915	28.58	37.2998	56.9115	68.0871	105.544	60.768	61.8693	84.6687
MSTRG.1877	PGSC0003DMT400004322	66.0869	71.1258	276.278	109.688	108.245	111.47	101.633	106.019	104.467	533.226	381.946	89.3653	81.8793	100.368	95.7753	84.1835	86.9336	83.251	68.0768	571.789	515.094	102.067	102.975	99.844	79.6948	83.1487	85.0058	66.1908	68.295	74.689	105.879	104.231	100.647	88.6052	99.1467	102.997
MSTRG.1880	PGSC0003DMT400004238	12.3752	9.83116	10.4844	9.98886	9.39415	9.08635	6.33875	4.91161	7.09514	5.89374	3.25187	12.3513	9.96479	9.5947	9.22453	8.08045	7.93846	8.14113	12.8514	5.00754	5.55963	9.12305	11.5063	10.9806	7.46709	8.96736	8.03435	13.3833	12.7306	8.66149	8.99029	10.8625	8.22931	6.18059	5.80099	7.70413
MSTRG.1883	PGSC0003DMT400004325	0.167294	0.219573	2.60267	2.1446	1.76762	2.11327	1.47749	3.09381	1.00553	5.97954	4.21436	0.64002	0.935874	1.42547	1.16099	2.63034	1.85628	1.32168	0.17326	3.14768	3.51697	0.467357	0.878112	2.06342	1.44314	0.878723	2.53224	0.105749	0.355075	0.394382	1.98559	1.62673	2.60624	0.469453	2.756	1.92091
MSTRG.1882	PGSC0003DMT400004240	2.88862	3.90531	0.730123	3.74576	4.37688	3.43296	1.96618	0.24901	1.56157	1.78462	0.90487	1.18641	3.63254	3.21077	3.09491	3.94443	4.57121	4.10803	1.51607	0.487763	1.48465	4.89308	4.21742	4.40685	2.76061	0.743655	4.32549	2.21366	3.57006	2.32913	4.00748	4.54688	2.64635	2.67863	1.55036	1.51785
MSTRG.1881	PGSC0003DMT400004324	82.2348	87.8173	90.0649	83.8773	81.1839	86.0954	68.6263	58.8758	75.424	76.8549	66.8608	82.3751	74.2053	108.93	91.8054	59.4823	77.6896	65.7566	87.0936	71.6776	100.195	129.288	118.943	143.944	72.1861	66.6251	67.2987	72.7652	108.825	111.867	94.0967	106.694	89.0746	76.1711	72.0568	62.4541
MSTRG.1885	PGSC0003DMT400004336	8.26818	8.40605	7.78965	7.46502	8.29055	7.45249	10.3751	8.25575	9.93314	10.5272	10.101	5.52255	6.01121	7.28924	6.44994	5.44538	4.67825	4.3741	2.64129	6.77328	5.98499	6.34153	7.86104	7.85566	5.32947	2.70218	5.56969	4.83028	3.27002	2.88387	8.55486	7.37686	6.01899	5.85623	6.26347	7.8531
MSTRG.1884	PGSC0003DMT400004330	19.8807	23.2007	12.6145	16.3148	17.9159	18.2727	13.8902	21.1641	18.9464	10.2348	11.8429	20.3592	13.5084	14.6416	15.2362	20.4878	16.182	17.9552	11.0155	6.76231	2.49276	13.6671	18.9412	12.7976	15.2111	0.256449	20.0226	16.4114	14.7936	16.9955	16.2381	14.0963	15.6608	22.7899	13.708	20.6017
MSTRG.1888	PGSC0003DMT400004338	0.441293	0.857782	0	0	0	0	0.638523	0	0	0	0	0.354728	0	0	0.73799	0	0	0	0.434027	0	0	0	1.15408	0	2.07569	4.72881	0.707678	0	0	0	0	0	0	0	0	2.57554
MSTRG.1887	PGSC0003DMT400004244	2.3957	2.70762	2.43349	2.26979	2.79634	2.19068	2.05154	1.63541	1.94235	1.60428	2.66791	3.11116	1.8804	1.94774	1.70319	2.60514	1.64676	1.97419	2.1335	1.68064	1.28117	1.90007	1.70357	1.48135	2.22887	1.4832	2.14134	2.67013	2.22862	1.33354	2.57301	2.03522	1.69217	1.69543	1.56201	2.24115
MSTRG.1886	PGSC0003DMT400004241	194.575	153.558	164.313	178.03	140.518	164.211	181.197	96.7562	94.7415	119.421	147.033	170.655	169.881	168.239	72.381	180.738	242.704	179.786	138.518	112.889	149.649	123.756	95.9292	93.5218	165.373	74.5397	143.671	103.975	96.232	164.218	155.231	145.081	163.909	78.5477	97.8624	64.8127
MSTRG.1890	PGSC0003DMT400004344	19.4104	15.7512	44.7903	23.525	23.2052	25.2075	24.1806	30.2145	26.5657	59.8435	58.0049	21.74	18.0937	21.3057	23.1607	21.9838	15.1125	14.7829	16.2978	67.979	57.7289	17.0012	22.2515	24.2006	17.1157	27.6452	14.966	15.2034	10.1421	10.9193	25.2147	24.5681	23.674	18.7314	27.6603	35.5781
MSTRG.1889	PGSC0003DMT400004341	27.9882	27.5877	43.7961	57.1554	59.2232	61.5388	52.2699	73.6434	55.0568	0.365699	52.206	13.1918	41.0337	43.0788	6.05931	43.2392	23.9099	32.9754	22.8714	4.72191	45.5444	0.410034	46.026	52.9041	0.151184	57.2411	33.7276	43.5794	20.503	13.117	66.4969	58.6483	6.21561	0.523443	55.81	67.6328
MSTRG.1893	PGSC0003DMT400004346	0	0	0	0	0	0	0	0.870241	0	0	0	0	0	0	0	0	0	0	0	0	0	0	0	0	0	0	0	6.97166	0	7.92898	0	0	0	0	0	0
MSTRG.1899	PGSC0003DMT400004255	0	0.350556	0.645461	1.2193	1.14373	0.409315	0	0	0	0.822931	1.32324	0	0.380489	1.26754	0	0	0	0	0	1.7044	0.871861	0.567063	0	0	0	0	0.517127	1.16909	0	0.587341	0.31007	1.20864	0.147076	0	0.318142	0
MSTRG.1895	PGSC0003DMT400004354	2.60681	3.39603	3.18903	3.19916	4.14711	4.52561	3.86069	3.69468	3.69861	3.07381	3.00026	3.78298	4.04347	4.05211	3.0338	3.28328	3.66654	3.58604	3.8243	1.38247	2.92364	3.52153	3.75486	2.66936	3.6602	4.48188	3.99576	2.86651	3.4518	2.27347	4.45847	4.2568	3.83932	3.70675	3.88085	4.16751
MSTRG.1894	PGSC0003DMT400004353	26.6559	25.0781	62.201	20.4287	17.9902	0	0	24.8216	9.9273	37.5527	40.0531	0	3.289	17.3594	19.8444	20.4222	17.237	0	24.498	64.9466	61.2863	19.645	20.183	16.3497	19.8595	22.2727	20.3321	23.5335	20.4042	18.1088	21.9877	18.5353	19.653	22.6094	19.9698	15.8307
MSTRG.1897	PGSC0003DMT400004355	6.16816	0	20.3456	19.7433	14.947	18.7231	16.3199	2.45004	22.9683	29.4953	25.4994	3.19036	17.2969	16.8585	15.4114	11.6791	18.6801	11.6517	11.8404	26.9389	24.915	22.7262	18.182	16.8946	3.64493	10.9553	17.7098	0	4.13389	16.1787	17.0064	19.758	14.9868	13.1991	18.2196	3.63557
MSTRG.1896	PGSC0003DMT400004251	0	0	0	6.15083	0.537619	1.65425	0	1.89152	0.302259	0	0	1.79394	2.74835	1.51728	0.140194	3.5768	0.90021	3.46028	6.98377	1.75179	0	0	1.33662	0	0	2.51067	2.87105	0	6.7279	0.317319	3.04871	0	0	0	3.88667	0.834771
MSTRG.1900	PGSC0003DMT400004258	0	0	0.62788	8.16338	0.002615	7.93848	12.6268	15.0537	0	0.650058	18.9951	0.003551	6.29136	0.037246	0.050882	0.009663	0	0.325548	0.27414	5.79817	0.565385	9.50839	0	0.198688	5.73554	4.55881	0.789848	0.087377	0	0.043986	13.9366	12.7244	0.1975	7.99515	1.03513	9.72225
MSTRG.1901	PGSC0003DMT400004269	41.3475	23.3339	20.5406	12.644	9.93343	13.9572	9.65386	11.9039	11.6785	19.288	17.8594	28.1557	12.8926	7.96439	14.4922	17.3947	14.6893	21.8085	36.0845	21.8798	16.9624	10.73	11.0577	10.0095	11.8017	25.1215	13.4681	25.8196	16.0081	14.7914	9.32508	8.03898	18.0145	9.20775	9.40242	13.4965
MSTRG.1903	PGSC0003DMT400080018	0.999599	0.934106	0.938445	0.778016	0.126406	0.299845	1.03753	0.970411	0.924838	0.442668	0.972576	0.624755	0.537773	0.377383	0.633109	0.828521	0.408165	0.574018	0.704384	0.487196	0.35665	0.5247	1.10697	0.43337	0.415937	1.10857	0.510488	0.755938	0.438722	0.55917	0.413731	0.327068	0.715206	0.537753	0.603008	1.35943
MSTRG.1905	PGSC0003DMT400080077	1.34923	1.05561	0.775034	5.74194	3.04407	5.30201	4.32592	4.39229	3.67916	1.13497	1.05485	0.830128	2.70424	4.62211	3.22717	5.44784	4.82624	5.38048	0.493728	0.129011	0.303394	0.435016	0.422874	0.982654	1.04085	0.599569	0.687147	0.545418	0.410421	0.124076	1.04301	1.05601	0.581674	0.343629	1.09321	0.487806
MSTRG.1908	PGSC0003DMT400080046	0.653588	2.30587	1.71619	0.79168	0.669519	0.880193	0.60297	0.751842	1.43605	1.6215	1.91917	2.17176	1.47952	0.218112	1.1835	1.70622	1.34272	1.19786	1.95276	0.692945	1.10116	1.19748	1.97527	0.996508	1.29014	1.50213	1.52893	1.07417	1.04223	1.03149	0.675974	1.21598	0.62072	2.42497	1.39278	0.774929
MSTRG.1906	PGSC0003DMT400080030	1.06697	1.09796	0	0.793416	0	0	0	0.781877	0.850332	1.38731	1.84069	1.01927	0	0.60573	0.479674	0.845887	0.371879	1.15967	1.7585	1.07576	0.819323	1.18622	1.25865	0.498205	0.999204	1.13625	1.03631	0.492867	0	0.938785	0.796544	0.611124	1.29605	0.807551	0	1.91077
MSTRG.1909	PGSC0003DMT400080048	14.2659	10.9641	19.9535	11.7418	11.7587	12.7931	16.6936	16.3244	14.2455	26.4673	27.8146	10.4888	15.914	15.3887	17.1965	11.1347	10.1257	12.1196	10.0653	29.2331	25.6093	10.359	12.2749	14.4435	12.5354	17.3516	15.912	9.2093	9.03719	10.7184	12.1756	13.9759	14.3435	10.523	14.2791	15.2059
MSTRG.1911	PGSC0003DMT400080050	2.3908	9.06716	5.16594	3.19297	4.47597	1.41315	9.55542	15.5081	15.114	2.20428	6.36747	4.05368	4.53113	3.95948	3.13916	5.48535	6.58214	4.49112	3.10801	3.06862	2.35335	2.35679	1.42268	1.7463	3.79627	7.90493	3.09598	2.1813	5.16751	8.45337	2.37672	4.93125	2.46111	9.93463	6.74111	13.8065
MSTRG.1912	PGSC0003DMT400080052	2.56824	20.9885	8.82306	5.53078	11.3189	5.27627	33.0406	40.7953	76.7603	9.21272	14.4713	10.7529	3.38394	5.85527	8.98794	9.02179	6.75087	7.66959	3.77743	16.9487	10.2156	5.79425	8.5466	4.43867	8.00581	24.5764	8.26464	2.82171	2.74997	6.72502	5.1733	9.79109	9.79372	50.1699	21.3608	60.5149
MSTRG.1910	PGSC0003DMT400080049	22.5473	21.9949	23.5381	14.5306	13.8533	15.3388	10.5066	13.9855	14.68	22.206	21.0443	23.0482	12.1457	13.5578	13.2547	11.8954	11.064	12.0453	21.4879	18.9613	21.5635	13.7139	14.7908	14.6938	9.54536	14.4896	11.609	18.0405	22.3677	13.9073	15.7223	13.597	12.2136	11.5514	10.8418	13.288
MSTRG.1914	PGSC0003DMT400080060	0.611939	0.324455	0	0	0.333055	0.50939	0	1.2344	0.952317	0	0	0.485367	0.45924	0.943419	0.817748	0.951614	0.65085	2.74277	0.550942	0.283455	0.093175	1.06316	0.869596	0.571577	0.803147	1.6917	0.810996	0.698204	0	0.227305	0.973828	0.444916	0.490624	0.636303	0.683355	0.7266
MSTRG.1915	PGSC0003DMT400080038	4.79759	3.77922	5.93565	6.75071	6.8362	6.78923	3.13939	5.28388	6.94214	5.90815	6.5902	4.9748	5.40545	5.69201	4.77516	4.65706	5.21715	4.71735	3.54701	5.90144	4.8291	4.67551	6.70081	4.77561	5.56698	6.00151	5.26614	6.07368	5.03868	3.3505	5.61295	4.95926	4.94415	4.85614	3.86155	4.08116
MSTRG.1918	PGSC0003DMT400080078	2.35195	1.30138	1.71453	1.76074	2.03148	1.80369	1.68191	1.98492	1.49931	0.6803	0.560472	1.62485	2.72153	1.91795	1.13261	2.15446	1.14087	2.8523	2.16641	0.744152	1.09019	1.82393	2.10289	1.69565	2.2144	1.67522	1.65457	1.4031	1.14179	2.74598	1.42341	1.43989	1.39209	1.49577	1.92162	1.7034
MSTRG.1913	PGSC0003DMT400080059	0	0	0	0	0	0	0	0	0.493807	0	0	0	0	0	0.148632	0	0	0	0	0	0	0	0.393702	0	0	0.733427	0	0	0.073458	0	0	0	0.331224	0	1.77391	0.552031
MSTRG.1919	PGSC0003DMT400080069	1.28787	9.16417	6.13537	3.1397	2.7591	1.98755	3.18414	0.985031	3.9926	15.5048	10.9851	1.54481	1.53818	2.94578	3.76552	0.208476	0.969052	3.27528	1.54616	16.7142	9.30184	6.09457	9.7785	3.49286	4.52195	6.71241	2.28947	5.141	2.30092	2.11792	2.88718	2.36053	3.1439	9.73681	1.49017	3.26416
MSTRG.1926	PGSC0003DMT400066885	0.329899	1.2795	0.959849	217.923	204.511	230.253	40.419	168.984	81.6135	0.438456	0	1.28471	108.316	156.892	105.367	412.853	310.2	273.478	2.47794	1.24916	0.786771	66.8538	98.626	130.561	240.309	63.3875	222.871	0	1.00058	1.52615	178.841	330.955	317.762	133.586	230.248	252.45
MSTRG.1921	PGSC0003DMT400080071	12.225	16.2113	8.59561	8.85235	8.82654	9.07137	8.20473	6.18663	9.04739	11.0448	7.85689	9.86332	10.8866	9.70969	8.86597	11.6853	9.60102	14.7442	10.5737	8.82702	8.81277	12.5066	10.3827	8.48748	10.754	10.7258	13.6241	12.888	11.4277	9.46966	9.12964	9.38257	11.8695	10.2233	7.06804	7.65309
MSTRG.1929	PGSC0003DMT400092726	3.57241	7.2251	6.88673	4.36925	4.44739	3.74978	2.09059	3.25975	3.05603	5.56287	6.50062	5.74636	4.28169	4.26458	2.55076	6.74026	5.45764	5.25999	4.15328	5.31661	5.86479	4.70392	3.49809	3.4783	5.54109	4.59717	4.99691	5.93876	4.27788	4.94521	3.73249	2.51491	4.25283	2.76023	2.99011	4.55678
MSTRG.1930	PGSC0003DMT400067051	2.01645	0.899248	0.275494	2.17882	1.35298	1.31604	0.618721	1.03988	0.930474	0.093394	0.455242	1.27124	1.04369	1.50515	0.611749	0.838659	1.51752	0.796432	0.675991	0.413315	0.350843	1.226	0.961053	0.820818	2.52023	1.51524	0.443692	1.31954	0.837367	0.11301	1.57994	0.585113	1.54677	0.843398	1.32394	1.21006
MSTRG.1931	PGSC0003DMT400067044	5.56154	5.97022	3.60483	2.99804	2.52741	3.35565	3.78263	3.49916	3.10749	3.5865	2.04913	4.16166	3.70086	3.41403	3.36681	6.43385	5.07177	6.03753	5.16578	4.02279	3.34438	3.27638	2.02507	2.69978	6.18171	2.8813	2.07041	5.69749	5.07974	3.79784	3.81772	3.46444	3.47511	4.69462	3.1234	4.13291
MSTRG.1920	PGSC0003DMT400080042	342.429	434.12	440.105	486.948	517.848	467.337	542.027	506.522	475.925	489.962	419.964	379.122	488.127	496.438	562.097	379.421	399.384	505.566	457.518	550.601	541.612	481.865	454.353	657.828	408.856	421.073	461.224	437.375	573.462	555.979	475.194	487.939	486.553	379.521	484.974	517.807
MSTRG.1933	PGSC0003DMT400092702	66.8154	121.747	162.348	209.545	259.106	204.176	182.187	142.33	136.489	141.932	151.692	75.2288	319.872	268.234	212.457	200.666	161.819	203.231	144.136	143.977	165.314	306.574	261.047	229.69	248.663	97.9152	209.156	135.703	142.504	135.93	212.039	232.904	242.133	194.452	184.219	129.097
MSTRG.1934	PGSC0003DMT400066877	200.805	165.924	175.953	201.646	202.776	206.194	210.24	191.798	187.529	136.033	132.625	193.412	210.605	208.034	209.448	223.222	179.279	221.105	243.646	161.752	154.054	178.229	194.998	234.67	188.716	235.394	192.881	220.52	165.373	182.681	199.054	251.981	255.851	181.773	224.913	219.208
MSTRG.1937	PGSC0003DMT400067038	0	0	0	10.3478	0	0	14.8864	0	1.85132	0	0	0	3.36341	0.177515	4.7801	4.2573	7.78883	2.87753	0	0	0	0	0.278537	11.0112	0.211981	8.69101	0	0	0.05049	0	0	3.01425	0	4.79419	7.92673	10.2238
MSTRG.1938	PGSC0003DMT400066873	102.758	72.9326	68.4557	49.6342	41.5333	8.02007	36.2325	42.4517	50.1844	53.6942	60.6451	87.8311	56.4462	53.0939	45.7142	54.0267	43.2514	63.7587	27.6946	35.774	1.96813	4.18233	61.195	52.7088	11.0397	18.4059	62.1207	4.87211	11.8083	17.5564	42.3224	35.2513	17.8453	41.4137	31.0424	42.4682
MSTRG.1941	PGSC0003DMT400067034	12.7818	15.6027	4.45191	15.8821	10.9093	11.8051	12.341	10.7422	8.51384	5.31592	3.89265	13.9268	6.57868	9.29446	8.30264	10.0869	5.52444	8.44909	8.9438	5.09065	5.95221	9.26762	15.7834	10.384	11.7362	4.00262	8.06119	16.3064	9.90233	9.15123	16.0472	10.368	10.3642	8.89419	10.0059	7.80379
MSTRG.1944	PGSC0003DMT400066867	14.6692	16.2423	7.14327	16.0177	14.2325	14.6327	13.2526	11.8378	13.9596	5.58788	4.45298	15.6571	15.5462	13.0937	13.4566	15.7681	10.6019	16.649	14.2788	4.48343	4.58124	15.4693	14.663	13.3957	15.3876	15.2814	12.6776	19.677	12.8756	11.0091	14.8288	13.047	12.9822	13.1666	14.3176	13.026
MSTRG.1942	PGSC0003DMT400067032	0	3.65219	0	0	0	0	0	0	0	0	0	0	0	0	0	0	0	0	0	0	0	4.51295	0	0	0.184256	0	0	0	0	0	0	0	0	0	0	0
MSTRG.1946	PGSC0003DMT400067022	0	0.2246	1.14711	0.272399	0.609036	0.572055	1.24345	0.957532	0.964929	0.376527	0.432914	3.62592	0	0.317757	0.162805	0.494788	0	0	0	0.740503	0.035264	0.216758	0	0.08436	0.071826	0.217189	0	0.036645	0.532485	0	0.244648	0.122127	0.157052	0.268844	0.385647	0.788078
MSTRG.1949	PGSC0003DMT400066847	0	1.02779	0	0	0	0	0	0	0	0.180473	0.45129	0	0	0	0	0	0	0	0.172786	0	0.233516	0.539353	0	0	0	0	0.270543	0	0.504625	0	0	0	0.537396	0	0	0
MSTRG.1950	PGSC0003DMT400066846	22.5837	25.8672	27.4328	158.521	153.826	113.728	24.5649	4.75912	3.55636	5.70991	2.84035	24.0548	89.5255	131.033	16.3233	94.7267	114.903	60.7236	146.297	8.93252	16.2709	32.5474	12.4968	93.2298	94.0443	1.96402	104.957	130.442	159.861	135.835	79.7101	157.967	75.8007	22.0654	28.8053	18.6748
MSTRG.1957	PGSC0003DMT400067012	8.13571	10.4812	10.6373	14.0959	11.0972	14.6458	13.4689	11.73	14.4334	11.1733	11.1971	4.7778	14.1659	11.0332	14.7148	8.64765	11.3438	13.3778	3.13642	10.7743	11.7514	16.1509	13.6372	12.9905	12.1024	14.5809	10.5285	9.27474	11.7336	12.7194	13.553	9.37882	18.2168	13.6956	12.647	11.4656
MSTRG.1958	PGSC0003DMT400067009	2.16856	1.88212	2.54236	0	0.943215	0	2.33227	4.66205	1.29632	0	0.835353	6.5906	0.976	1.34505	0	1.97212	0	0	1.18542	2.69257	1.87597	0.444769	1.35902	0	0.852716	0.046218	1.54147	1.93905	2.84002	0.243439	0.03744	1.01575	0.022125	1.12703	2.42837	0
MSTRG.1959	PGSC0003DMT400067008	1.68282	1.89249	2.1676	1.27085	1.14351	1.55784	1.63479	1.31334	0.961454	1.74757	1.2972	1.48239	0.906251	1.03389	0.8171	0.605902	1.06125	1.16456	1.43822	1.26953	1.336	1.17	1.22042	1.87113	1.16779	0.649	1.15756	2.37888	1.68937	0.462028	1.37962	1.84094	0.923009	0.998372	0.72268	1.04506
MSTRG.1960	PGSC0003DMT400067003	9.31292	10.0966	19.7092	20.123	17.345	12.0949	4.43363	3.81787	7.2065	15.7477	7.24635	7.72358	13.5661	22.8374	7.88898	11.8398	11.6754	8.44745	17.8472	17.5619	24.4692	14.9317	8.38147	21.5376	9.9026	5.81595	11.9532	15.9906	24.776	25.1223	11.8391	15.2302	13.5761	8.65033	7.60779	3.85664
MSTRG.1966	PGSC0003DMT400066994	0	0.128427	1.37735	0.302029	0	0.281336	0	1.32951	0.10165	0.579417	1.09186	0	0.615198	0.69073	0.114978	0.191636	0	0	0.068243	0.633053	0.426076	0.203917	0.065848	0.272111	0.202198	0	0.188504	0	0.689585	0	0	0	0.047656	0.073789	0.555785	0.404029
MSTRG.1965	PGSC0003DMT400066996	1.07675	1.64684	3.29322	3.96892	3.31693	3.2206	5.02125	4.93162	4.74784	5.59919	7.26424	1.17837	2.55344	3.27488	3.89767	2.6425	2.38426	2.43101	0.729812	4.68836	3.08439	2.52729	2.78094	3.73128	2.34767	2.65563	2.13949	1.17982	0.747488	0.341505	3.62099	4.09986	2.84158	3.36743	4.14974	4.83379
MSTRG.1967	PGSC0003DMT400066840	1.84313	3.58525	2.87575	5.24029	6.55375	5.88491	3.43737	4.0568	3.96816	2.22622	2.94367	2.34125	6.55799	5.23717	3.94825	4.93738	3.70748	5.60613	4.62399	1.86528	2.30933	5.07097	4.28819	4.47945	5.79275	1.19642	5.91627	4.7744	3.13668	2.35932	5.01981	4.89371	3.02299	5.34881	3.74004	2.73766
MSTRG.1962	PGSC0003DMT400066993	0	0	0	0	0	0	0	0	8.1099	10.9678	14.4425	0	4.0372	0	5.21515	0	0	5.37202	0	0	0	4.77202	5.33785	6.19505	0	4.36512	0	0	1.49142	0	0	0	0	0	6.45297	7.84747
MSTRG.1963	PGSC0003DMT400066995	0.917443	0.332958	4.55442	3.24928	2.4727	2.45211	3.96398	3.76908	2.11971	3.77436	6.57462	0.186629	1.13912	2.9057	1.43037	2.36379	1.61034	2.50446	1.03263	3.11563	3.85677	1.37617	1.71169	3.51991	1.79038	1.51929	0.91779	0.040189	1.28843	1.45651	1.20298	2.23673	3.11998	2.25715	3.69005	3.72015
MSTRG.1969	PGSC0003DMT400066838	2.07174	7.05984	5.45309	0.873772	0.498164	0.664069	0	0.319769	0	12.3366	12.9871	2.55223	1.45058	0.522113	0.451341	0	0	1.49622	2.71983	12.9941	9.86178	0.789316	1.08816	0.634833	1.72781	0.297709	1.40481	4.44553	2.58856	0.795018	0.730993	0.366746	0.80313	0.251072	0	0
MSTRG.1970	PGSC0003DMT400066990	34.5245	28.9653	24.674	28.2074	25.3575	30.3704	17.903	25.935	25.1333	30.6176	31.3457	34.0238	22.8698	22.4415	24.8386	18.9494	19.7715	21.3301	32.3069	24.2835	28.2921	25.9896	28.342	31.9696	21.2473	22.6842	14.2907	29.6526	25.007	25.5984	32.6104	33.1341	29.8219	34.2508	21.4981	30.0726
MSTRG.1972	PGSC0003DMT400066988	2.01508	2.19567	2.2325	2.3115	1.34498	2.55064	3.51025	2.37521	2.72684	2.94659	1.11342	2.02216	1.57446	2.64591	1.99811	1.77981	1.69328	2.67229	1.4349	1.52632	1.76642	2.09331	2.0216	1.44826	2.26222	2.14949	1.6167	1.7305	2.03142	1.2976	2.81773	1.88065	1.95366	2.38748	1.71938	2.12339
MSTRG.1971	PGSC0003DMT400066836	34.5965	20.4496	4.30154	7.30629	5.141	8.96466	25.2336	0.934795	2.63476	21.9402	1.88502	4.92988	3.80641	3.16279	3.8365	0	1.80467	19.8155	6.58598	10.742	15.3037	14.0011	1.31596	4.14576	6.35246	3.00777	6.37837	2.63403	1.67377	0.520281	3.71854	12.1624	1.02578	11.3871	1.94747	5.43368
PGSC0003DMG400026038	PGSC0003DMT400066984	1.32083	1.34525	1.01425	1.14278	0.823081	0.708095	0.618828	0.913531	1.12207	0.614104	0.943018	0.826139	0.693798	0.834679	1.13527	1.22636	0.697204	0.466773	1.0008	0.623741	0.925223	0.877938	0.700723	1.10046	1.00575	0.700707	0.576594	1.10827	1.25885	1.08485	1.23203	0.983086	1.04431	0.733084	0.760527	0.608396
MSTRG.1973	PGSC0003DMT400066985	0.175037	29.0476	0.442558	0.693354	20.9267	0.777139	0.159788	1.01114	0.552716	1.02388	0.457564	0.450699	0.217638	0.384292	0.381489	0.645106	0.124749	0.789943	0.479463	0	20.6648	0.454707	8.12555	0.493223	0.373617	1.21878	0	0.438283	35.5777	40.27	0.456447	1.06215	0.466974	0.016032	0.526752	17.6003
MSTRG.1974	PGSC0003DMT400066986	42.1076	34.3849	34.3583	25.9479	22.8586	25.0575	22.7491	21.4571	28.4965	25.1572	27.028	32.9313	26.5799	26.6519	26.6837	33.0108	31.4735	41.7061	42.5165	26.7931	25.4133	31.3437	34.5599	29.5113	24.189	42.0349	29.6898	32.7259	34.7076	47.539	23.312	21.7708	31.6	21.384	21.0024	24.4493
MSTRG.1976	PGSC0003DMT400066977	9.131	16.4528	16.2417	9.67954	9.12839	7.17734	4.93021	5.4998	3.10345	6.95086	13.3724	14.4845	8.06153	8.79751	6.2584	13.806	10.1316	17.7659	12.7286	9.0077	12.6255	13.1508	6.69051	5.48558	13.4543	5.04399	10.2936	16.78	13.8019	21.7452	8.57592	10.0805	6.81472	13.3065	11.6335	6.29192
MSTRG.1975	PGSC0003DMT400066980	1.29158	0	0	0	48.9126	43.0971	0.900057	0.165113	66.3844	14.7371	11.5981	1.92898	57.6345	2.07946	62.4853	0.199895	57.6539	1.6658	0.11595	0	25.9509	65.7545	2.15522	1.17436	86.1526	96.7484	29.925	0.305562	0	0	1.12398	19.4795	0.749454	1.66544	61.0545	1.5247
MSTRG.1978	PGSC0003DMT400066819	0	0	0	0	0.132331	0.259107	0	0	0	0	0	0	0	0	1.12236	0	0	0	0	0	0	0	0.135575	0	0	0	0	0	0	0	0	0.231426	0	0	1.09464	0
MSTRG.1977	PGSC0003DMT400066827	0	0	8.30164	0	0	0.329946	0.341716	0	0.160835	7.77874	4.72479	0	0	0	1.0781	0	0	7.30699	0	7.59571	0.101696	0	6.53752	0	0	0	0	0.008393	0	0	0	0.220642	0.062014	0	0	0
MSTRG.1980	PGSC0003DMT400066818	35.3114	32.4985	25.2955	21.6176	19.4846	18.9326	10.9976	12.6999	17.7076	11.3724	12.6292	34.0948	20.4225	19.0034	15.6862	23.438	15.2637	16.6756	28.7638	14.5561	13.252	21.6915	23.6731	15.0929	18.7368	18.7399	18.4822	27.8634	33.301	27.355	17.5832	15.0964	19.7368	19.3887	11.4043	13.632
PGSC0003DMG400025978	PGSC0003DMT400066814	0.28067	0.998316	0.337446	0	0	0.217247	0	0	0.349812	0	0	0.961178	0	0	0.435372	0.511006	0	0	1.10107	0.772913	0.478462	0.183787	0.495797	0.804047	0	0.707509	0	0.532248	0.859902	0.347443	0.29145	0	0.153782	0.366331	0	0
MSTRG.1981	PGSC0003DMT400066962	98.0995	87.6387	4.62881	92.8847	79.3686	80.5172	71.2001	83.2151	92.9734	53.0828	75.7188	104.808	67.0536	86.4892	79.8697	80.2009	4.60355	87.6186	87.3127	70.34	63.418	76.4563	77.0505	99.8238	71.126	91.0749	43.4122	98.1607	91.2011	51.0901	95.9342	87.4162	79.6007	45.3199	62.2094	83.4453
MSTRG.1983	PGSC0003DMT400066817	9.23957	7.39813	11.8773	0.955388	14.173	15.0326	18.8131	41.1963	39.4347	8.24245	6.63082	10.8189	11.5117	12.7146	20.6977	8.2301	8.70361	14.4494	14.0358	6.84383	7.78415	13.4957	15.2295	12.0178	9.40522	24.2484	11.4661	11.121	10.6399	4.61034	14.606	12.974	18.7193	15.5284	28.8547	36.7492
PGSC0003DMG400026025	PGSC0003DMT400066953	0.359849	1.40275	0.576856	0.239734	0.549479	0.555212	0	0.398792	0	0	0	0.352096	0.788909	0	0.590682	0.671962	0	0.349171	0	0	0	0.197348	0.121079	0.57137	0	0.654427	0	0	0	0.591579	0.498226	0	0.828971	0	0	0.285008
MSTRG.1986	PGSC0003DMT400066954	116.43	100.674	98.8669	96.9481	89.9805	88.0606	70.6205	73.5642	79.8385	95.163	93.5573	109.246	65.3407	80.0303	82.4425	58.4835	55.0642	61.7276	95.6218	95.569	91.4473	76.074	83.9084	109.175	58.1203	56.0219	68.6698	98.025	101.365	76.0655	105.049	99.9915	82.9738	58.7614	70.1961	85.7883
MSTRG.1987	PGSC0003DMT400066810	52.1257	45.6337	34.5729	77.247	74.8935	74.655	79.5867	62.0674	73.8824	33.2917	28.7265	50.7145	61.8325	77.4487	69.1278	66.7598	52.6146	66.8706	43.2138	32.6532	33.7974	64.7592	65.3581	76.6002	50.55	51.2476	49.2985	48.1126	38.2577	35.1073	79.2159	83.7616	70.3059	47.9608	69.454	60.7024
MSTRG.1989	PGSC0003DMT400066807	2.94379	6.58678	9.80551	1.45295	3.2736	2.20751	0.925615	1.88998	0.864154	4.87243	5.13659	4.30459	1.21286	2.45581	0.9307	2.93456	1.96649	1.21346	19.9638	4.92322	3.84008	0.613869	0.200445	0.709046	1.89459	1.33444	2.15389	9.3945	14.8668	10.3146	3.21227	1.74621	1.64748	0.520821	0.75888	0.860384
MSTRG.1991	PGSC0003DMT400066943	0.196266	0	0	0	0	0	0	0	0	1.21556	0	0	0	0	0	0	0	0	0	0	0	0	0	0	0	0	0	0	0	0	0	0	0	0	0.17446	0
MSTRG.1992	PGSC0003DMT400066939	2.22379	2.78377	1.95871	1.02368	1.75559	1.88364	1.71644	2.18517	3.82047	3.8758	4.74981	2.3851	1.24507	0.564059	0.993514	1.89376	0.970965	1.7132	1.59779	2.52219	3.84015	1.07148	0.925027	0.825898	1.47403	1.27023	1.58127	1.80217	1.37812	1.55574	1.58387	1.99517	1.63574	2.20168	2.58976	2.2875
MSTRG.1990	PGSC0003DMT400066949	7.19307	7.81865	4.46503	3.11448	4.52531	3.06705	1.0027	1.33115	0.909305	0.710706	1.59092	6.6623	4.25223	3.74301	2.22889	2.96451	4.43949	1.40096	8.45269	0.638731	0.376655	2.17573	2.27441	5.32649	2.32576	2.49845	1.97098	6.88713	12.391	9.70652	2.07258	3.53158	1.86147	4.67507	1.2612	2.36169
MSTRG.1993	PGSC0003DMT400066938	0	9.53351	9.50435	9.91188	0	11.6713	1.36054	0	12.4063	13.0385	0	9.06687	8.35281	0	0	10.7095	0	0	6.41974	0	11.5856	0	0	10.3014	0	4.58646	0	0	0	5.98178	11.8274	11.0573	10.8411	0	11.1658	12.6586
MSTRG.1997	PGSC0003DMT400066925	0	0	0	0	0	0	0	0	0	0	0	0	0	17.3175	0	0	0	0	0	2.28822	1.03924	4.28031	0	12.4654	2.37068	19.3338	0	0	0	0	3.2327	0	0	0	0	2.93025
MSTRG.1995	PGSC0003DMT400096490	0	0	0	0.52075	0.59379	0.395327	0.967364	0	1.02152	0	0	0	0.487509	0	0	0.963358	0.394221	0.901061	0	0	0.146821	1.01175	0	0	0	0	0	0.326107	0	0	0	0	0.188444	0	0	0.306451
MSTRG.1996	PGSC0003DMT400066805	8.96043	8.15233	4.99289	8.62747	7.6744	6.3423	4.77081	3.0242	7.3817	5.38909	5.51671	6.54744	10.6685	9.63275	9.36885	9.31694	7.4399	8.16968	10.6422	6.95199	7.04525	10.9676	12.678	10.9593	7.43951	8.69323	5.4698	7.47983	8.93257	7.3279	9.32491	10.7328	9.96577	6.18876	7.856	5.96371
MSTRG.1998	PGSC0003DMT400066924	9.96804	8.51206	20.8638	25.5242	31.0643	25.4107	26.5	24.8491	24.1356	21.4967	19.8625	11.7734	15.8041	24.2118	21.3599	21.8922	17.58	17.6718	12.8113	20.2806	18.1056	20.1761	22.5338	27.6984	16.7453	23.9751	16.5693	11.8324	10.2128	9.37512	27.7051	28.3281	24.8482	20.8983	28.1351	24.8694
MSTRG.2000	PGSC0003DMT400066801	10.3574	0.229733	15.2806	7.41051	7.28252	8.86602	1.01394	4.8102	0.655006	11.321	8.73214	9.21454	6.73582	0.184995	6.06433	6.93091	0	7.07392	8.94867	4.87542	0	1.53158	0.894751	7.4975	8.22061	1.16819	0	0.183739	7.89079	10.6808	2.81519	1.3795	4.43992	0.061332	5.24471	8.04748
MSTRG.1994	PGSC0003DMT400066930	0	2.0053	0	0	5.40822	0	0	0	0	0	0	0	0	0	0	9.91772	0	0	17.7379	3.89926	0	6.21305	0	0	15.8999	13.462	0	0	0	7.46499	6.894	0	11.6045	0	0	0
MSTRG.1994	PGSC0003DMT400066926	1.80564	1.79939	0.748759	6.05854	0.638768	1.18086	1.56161	0.791159	0.52409	3.29975	1.98464	1.11955	3.50341	0.748787	0.591437	0.988338	1.21436	0.75801	0.919373	1.70639	0.286147	0.429567	0.658841	0.317836	0.370163	0.576061	4.98741	0.887004	1.06971	0.298902	5.21482	1.09529	2.18172	1.192	2.51157	0.948664
MSTRG.2001	PGSC0003DMT400066917	0	0	0	0.262641	0	0	0	0.197541	0	0	0	0	0	0	7.14295	0	0	0	0	0	0.027055	0	0.045902	0	0	0	0	0	0	0	4.14436	0.056491	0	0.043429	0.059153	0.089025
MSTRG.2005	PGSC0003DMT400066912	1.36446	0.111929	1.3698	7.4443	12.556	18.6725	11.9291	18.9791	9.45272	0.604488	0.623486	0.660857	9.10304	8.31	15.0654	4.14675	4.87657	0.992982	0	1.20709	0.135911	4.45837	7.18269	3.22692	2.83335	2.25036	1.34113	0.720189	0.839433	0	8.01948	9.44934	4.82953	6.85054	9.23799	15.5457
MSTRG.2002	PGSC0003DMT400066799	12.9299	12.762	10.2815	13.0552	11.3037	12.2181	12.4867	15.0789	12.2649	7.70539	8.23222	10.0752	11.1597	11.7913	12.2043	13.5895	8.72953	11.872	11.6342	8.10987	9.77102	10.2263	12.2189	13.0058	11.7399	10.4974	8.73859	13.2571	11.0726	8.25685	14.0797	11.9965	10.6521	11.0435	13.1045	14.0322
MSTRG.2008	PGSC0003DMT400066911	2.77576	5.22745	42.727	13.4971	14.3365	21.2487	26.5394	36.0725	19.4019	68.6706	54.1326	4.09861	8.88909	11.1235	21.3752	11.2876	11.1031	15.3735	2.39344	46.1183	50.1115	4.22179	17.5415	13.1531	12.6109	24.6594	8.45217	3.72011	3.78621	2.95366	15.9913	13.8586	28.1611	15.359	24.3065	46.519
MSTRG.2007	PGSC0003DMT400066792	14.204	13.5068	36.8288	28.4941	27.8057	22.0544	23.3586	27.8752	29.0217	40.5525	40.1943	11.2274	20.9471	22.1077	24.4482	25.9618	21.7067	25.2555	17.2971	45.2922	39.7379	27.7245	25.7419	23.1297	20.7826	19.1454	24.8262	14.5749	13.329	15.2302	23.3513	23.9972	24.2887	28.3286	26.3629	28.9769
MSTRG.2006	PGSC0003DMT400066797	20.9358	26.0017	44.0345	30.8578	42.2172	45.3847	35.791	48.4156	52.5856	47.329	55.9225	15.288	25.1813	32.9494	37.7626	32.2845	23.4114	25.3089	24.1231	48.4012	57.3761	37.3638	46.2181	42.8764	29.7154	30.6097	23.6345	20.467	27.0631	24.9543	39.9356	42.5038	43.7038	46.5444	44.6201	52.4892
MSTRG.2009	PGSC0003DMT400066909	11.0466	14.1755	2.16466	3.84951	1.78862	4.98004	0	2.54875	2.74757	0.891887	1.92522	7.11805	1.65725	3.7992	2.5895	3.12469	2.47607	3.38012	1.89353	1.77178	5.4033	2.33761	6.37881	2.54733	3.63494	6.79758	3.49343	9.38864	11.2298	7.59419	2.9169	1.37758	3.37809	5.10572	2.73039	2.12975
MSTRG.2011	PGSC0003DMT400066905	38.4534	23.8207	35.8468	40.4238	39.7331	47.2592	46.3346	48.241	51.5564	27.8051	32.0525	36.0569	35.9386	38.2326	46.8232	14.1183	36.6575	38.6806	30.2448	38.0245	23.1881	36.3044	47.9085	52.126	36.5729	36.6639	33.5267	37.405	35.3543	29.6648	44.5457	48.874	42.4316	9.22658	37.4713	59.4579
MSTRG.2015	PGSC0003DMT400066774	3.96748	5.17403	4.98374	3.96771	3.92537	4.12326	5.20663	4.40197	4.0367	4.91983	4.63665	5.37682	3.56717	3.1523	3.65128	3.64715	2.21232	2.73747	4.88764	5.39074	4.48365	3.31668	3.48848	3.84654	3.74229	4.11418	3.10202	4.61655	4.10764	2.17587	4.39176	4.28104	4.36581	2.97215	3.37243	2.90539
MSTRG.2022	PGSC0003DMT400066897	3.52883	6.31962	8.78881	9.514	10.3415	9.22588	9.58344	7.88752	9.85734	12.2563	10.5927	4.12582	5.41462	7.23729	7.77241	6.38568	4.56395	5.27578	4.03953	10.5675	11.6771	9.29059	9.35677	6.92213	6.261	4.17539	6.96673	3.77755	4.6898	3.84987	8.77166	8.11318	6.39608	9.33796	10.1597	9.08495
MSTRG.2023	PGSC0003DMT400066771	10.1232	2.12676	3.50888	3.62968	2.45749	1.6434	0.889983	1.44036	2.45931	2.58734	23.1856	1.0091	14.6054	1.60066	13.4377	1.83324	0.830458	1.5485	1.01054	17.3389	22.1987	13.6704	1.90201	0	2.69916	0.996215	0	2.27603	9.84283	0	2.18725	17.8047	14.3504	11.9088	12.1564	1.77952
MSTRG.2021	PGSC0003DMT400066898	38.7247	30.2056	82.3686	142.276	179.794	170.38	134.537	176.488	209.185	93.4339	98.9661	32.7516	89.693	111.23	164.85	103.096	71.0918	93.1847	49.7271	96.5658	104.051	121.355	175.962	171.164	89.9759	139.711	82.8409	40.8757	42.5296	32.4305	163.849	168.526	165.124	172.483	224.093	278.648
MSTRG.2026	PGSC0003DMT400066768	1.22318	0.229347	0.84035	0.352766	0.993545	0.811524	0.163828	1.1619	0.521634	0.309653	0.343687	1.02243	0	0.826103	0.425328	3.40003	2.08357	1.91461	0.182801	0	0.198919	2.29879	1.78678	0.16714	3.46392	1.15413	7.33721	0	0.212854	1.12034	0.18145	0.256926	1.01742	1.48702	1.02722	1.5549
MSTRG.2025	PGSC0003DMT400066769	1.16698	0.462274	1.26895	1.12344	1.92152	1.95377	1.48596	1.55055	1.20894	0.832187	0.816356	0.689235	1.04951	1.23544	1.52256	1.08738	0.654151	1.19546	1.10291	0.323303	1.32979	1.38687	1.82916	2.18416	0.737858	0.892884	1.03278	0.964011	2.02091	1.60966	1.52328	1.83323	1.19989	1.02104	1.73095	1.53216
MSTRG.2024	PGSC0003DMT400066770	157.91	137.908	187.796	250.59	223.137	239.65	204.409	193.838	239.28	208.75	184.75	147.086	171.675	229.439	238.28	174.241	186.723	208.761	191.605	200.218	198.094	259.131	258.022	322.772	155.125	147.245	197.725	160.681	239.344	219.173	256.358	255.94	213.01	204.771	183.32	220.436
MSTRG.2028	PGSC0003DMT400066762	101.729	84.5995	135.328	80.7536	89.2058	65.8103	29.07	28.1875	38.4353	128.673	130.574	108.53	57.1848	60.1767	37.1871	37.8815	45.3221	35.8537	106.703	127.991	145.364	59.8828	44.6027	94.2354	31.0129	26.4778	48.7285	115.446	108.308	116.278	45.4179	76.0134	55.6501	25.3244	36.3033	32.5066
MSTRG.2027	PGSC0003DMT400066765	198.387	76.9509	45.9978	23.3711	12.0872	13.0952	5.51675	10.2	16.2062	21.0699	36.5692	112.353	22.9454	17.1825	15.7505	30.0601	16.0909	22.492	103.553	29.4164	30.83	25.1354	35.1525	19.0963	13.5318	41.5793	17.5107	135.967	102.671	38.6285	13.3597	11.0745	29.6467	17.3624	3.13511	13.8506
MSTRG.2029	PGSC0003DMT400066761	65.9371	69.1555	70.4142	73.4568	67.1951	73.6091	67.3785	61.7301	71.0239	64.0126	66.9538	72.3496	60.7421	57.3491	60.794	71.9977	65.3825	85.2257	70.8671	63.8807	66.0912	64.7737	63.4571	60.9608	60.5706	81.6749	67.3474	57.3946	60.1031	61.0728	78.7266	65.7162	77.7621	61.6263	58.8986	63.0073
MSTRG.2032	PGSC0003DMT400033236	33.2673	68.3181	114.794	705.185	881.545	414.101	26.6907	26.0674	17.834	30.0762	9.87975	25.4712	571.039	782.068	107.52	551.114	707.293	261.5	230.889	48.6857	78.8301	351.47	138.92	453.712	525.164	22.048	529.837	243.538	512.309	307.434	403.013	822.078	334.038	252.508	170.545	55.8876
MSTRG.2031	PGSC0003DMT400033264	3.37343	2.3107	2.576	0.998932	1.62608	0.878648	0.861515	5.23834	1.52943	2.33528	7.82827	6.71676	7.87741	4.32805	1.38188	2.01574	1.9454	2.92786	2.79321	1.98426	1.16722	0.599394	3.6971	2.14385	0.796565	3.53745	2.77134	0.845614	0.640077	9.624	1.47816	0.56157	2.27196	3.01027	0.605152	3.39952
MSTRG.2036	PGSC0003DMT400033260	0	0.167053	1.38653	0	2.08465	0.99699	0	2.66224	0	1.92989	2.83094	0	4.62779	1.7228	0.691234	0.856455	2.03919	0	0	1.25196	2.61599	1.28239	0.143552	2.09346	0	0	0	0	0	0	6.56864	3.47387	5.20024	1.0509	2.00882	0.074872
MSTRG.2034	PGSC0003DMT400033263	6.63056	5.21699	15.6093	18.126	16.6934	12.9334	12.8395	14.7661	8.55884	14.8681	18.8408	6.11691	4.33539	10.5675	12.178	1.91258	8.8679	3.54876	5.35257	3.75845	4.48847	8.33353	8.59033	3.56683	7.0255	9.29963	7.82389	5.46399	4.13618	3.77996	15.3336	10.6804	14.2074	10.2471	14.2438	12.5975
MSTRG.2039	PGSC0003DMT400033224	0.506109	0.470074	0.381273	0.834699	1.36187	1.13242	0.259291	0.800708	0.935395	0.361033	0.407511	0.353588	1.03144	0.715782	1.04033	0.814249	0.725727	0.425074	0.336577	0.1904	0.491136	1.03454	0.723319	0.615924	0.473564	0.244635	0.54004	0.608372	0.308528	0.181409	0.495391	0.917652	0.912183	0.518592	0.534826	0.490109
MSTRG.2033	PGSC0003DMT400033232	7.85852	20.6271	67.8472	72.1802	56.3201	93.8999	35.7414	30.386	24.3088	27.0582	26.5587	28.937	109.738	35.1747	16.168	26.1943	101.729	25.6579	14.787	32.822	7.58941	43.8494	63.3784	59.8036	30.5725	16.4153	15.6489	22.1024	69.3082	34.2377	66.4775	57.2181	25.4979	9.60695	0.30461	37.0949
PGSC0003DMG400012778	PGSC0003DMT400033270	0.316281	0.448538	0.764054	0.492226	0.028177	0.263002	0.271744	0.32555	0.267706	1.15913	0.579728	0.907323	0.415466	0.295729	0.326516	0.502838	0.526115	0.168175	0.354945	0.76851	0.81512	0.288697	0.566365	0.348419	0.461188	0.58896	0.192492	0.43204	0.32952	0.120732	0.177433	0.143495	0.248943	0.255611	0.579688	0.374589
MSTRG.2035	PGSC0003DMT400033230	3.14485	4.31066	1.96933	5.79714	6.11679	8.55294	5.36676	5.51106	6.58517	1.74579	2.62198	4.73214	5.39218	5.136	5.26825	3.94483	4.07425	3.82509	3.95552	2.52268	3.36812	5.96049	7.02163	6.72068	4.19368	5.61246	4.91239	4.53121	3.88798	3.27164	8.65942	7.93816	6.76218	5.61321	5.98634	5.09553
MSTRG.2037	PGSC0003DMT400033256	0	0	0	0	0.872111	1.31129	0.51665	1.07759	1.22351	0.363757	0.405078	1.21317	0	0.712296	1.40214	3.16166	2.16467	0.769611	0.416509	0	0.174864	0.519736	1.40069	0	0.794994	0	0	0.943986	0.656115	1.07193	0	1.6742	0.251611	0.681804	0	0
MSTRG.2037	PGSC0003DMT400033255	2.50132	3.11108	1.06916	3.91795	1.80463	2.41935	3.95001	2.45567	3.34836	1.31323	0.757577	2.14121	4.23257	2.0543	3.7922	3.77759	3.40516	6.91635	0.77544	1.64165	0.778752	2.92255	4.85297	3.9249	3.81719	1.92193	4.25754	0.167647	1.1141	1.64124	3.30518	4.20718	4.54672	4.12354	4.00301	2.14197
MSTRG.2038	PGSC0003DMT400033227	2.2147	4.03293	0.406634	7.84155	8.36045	10.2981	9.43483	7.39913	8.56844	0.836632	2.24704	1.25434	5.79384	5.60634	8.76068	9.20445	10.4272	6.28201	2.22148	0.42327	1.06507	7.72305	11.8513	7.21772	5.81361	3.55581	10.883	1.92336	0.926436	1.67951	9.12073	9.8151	6.29675	5.7814	9.18339	7.38798
MSTRG.2040	PGSC0003DMT400033222	15.5471	10.5172	20.8501	11.4226	10.3043	11.8419	9.794	12.6691	12.9851	25.9659	28.5387	14.6818	7.88753	9.6828	11.694	12.4254	7.57615	13.3785	9.98656	24.7631	23.178	9.62972	12.2647	9.05003	10.4063	12.9802	9.25577	13.609	8.49447	6.16855	11.0476	10.1427	10.0994	12.6531	10.7689	10.8725
MSTRG.2041	PGSC0003DMT400033219	4.58161	3.7671	5.43059	4.86993	5.4415	5.70599	3.93916	2.30761	4.39587	1.35867	1.03356	5.31574	4.2638	5.73189	4.59592	5.14459	4.03414	4.35607	4.24031	1.87367	1.97368	6.07961	3.65299	4.99134	5.34117	5.27161	5.35354	4.40052	5.18911	3.27651	5.16138	5.33626	3.15559	3.2901	4.35791	3.12227
MSTRG.2043	PGSC0003DMT400033250	1.18288	1.64523	0.77663	1.94772	1.03037	2.22827	1.50627	2.36857	1.3262	1.4594	1.50927	2.60845	1.5702	2.15104	1.44802	1.2392	1.71447	2.84354	2.35538	1.48357	1.87619	1.35666	1.16954	0.643695	2.50703	1.26633	1.57095	1.21315	2.0854	2.00726	1.43105	1.21955	1.31822	2.54695	1.59395	1.53484
MSTRG.2044	PGSC0003DMT400033248	2.35191	2.43682	10.9202	6.84313	4.8437	8.24486	4.43701	2.70353	2.14512	28.9478	21.0826	0.977763	5.16357	6.41647	4.28324	3.5434	4.19839	2.72559	2.46781	14.718	12.8976	5.50884	7.17667	6.92064	2.98767	2.48909	2.47071	1.22897	0.987131	1.31873	4.69315	4.12332	6.08359	2.57609	3.51962	3.85999
MSTRG.2047	PGSC0003DMT400033208	0	2.10241	0.747473	2.43125	1.8465	0.963612	1.4163	1.27026	1.67094	0	0.796995	3.81695	1.39997	0.778471	1.51429	0.933349	1.37209	0.849509	1.03577	0.665516	0	2.1201	2.09767	1.00256	2.4269	1.90384	0.695799	2.74551	0.807774	0	2.25962	1.81958	0.769816	0.571528	0.225841	0.657607
MSTRG.2042	PGSC0003DMT400033251	42.9485	38.584	39.3074	64.8071	52.8161	58.1138	47.8698	63.9964	67.9594	52.0422	51.874	55.4101	39.0181	48.0937	47.6685	49.1742	29.4723	46.5869	45.2854	39.0517	32.6328	48.0314	54.9134	52.1188	45.4179	72.3195	48.9949	70.7027	39.1373	24.8568	66.7336	51.2089	42.403	44.1504	52.1559	69.6373
MSTRG.2048	PGSC0003DMT400033203	17.3081	14.0691	7.52166	13.7717	14.5138	14.4222	10.7377	17.1615	16.3169	7.99089	8.78737	15.5698	8.79782	9.55264	11.9103	12.0563	8.00124	11.8584	13.6598	7.45503	6.02381	10.4413	11.3989	12.7923	10.7173	13.2013	10.8772	18.547	12.8461	6.13678	14.2168	12.8143	11.8996	13.655	12.794	17.5705
MSTRG.2050	PGSC0003DMT400033247	40.3111	43.3392	56.0334	52.4386	53.8516	44.6483	57.6499	46.0597	30.2538	44.8313	46.4045	51.3722	52.7072	52.103	54.0061	52.9642	47.2162	67.5607	62.3409	42.5079	49.6326	34.2804	27.1436	44.7231	55.0716	43.8964	50.1906	38.4411	41.9802	57.396	49.0095	58.5025	57.2934	37.7089	66.1688	51.2614
MSTRG.2051	PGSC0003DMT400033202	19.2969	40.0659	16.7208	15.8979	23.8845	10.3026	8.49061	9.52273	7.69234	22.5593	17.9974	20.3667	46.4173	32.5809	19.9446	33.677	25.2326	30.7738	26.4952	18.7514	22.0398	34.19	13.4405	21.1574	39.9846	3.14767	31.5558	29.1893	23.68	22.8397	16.9476	14.9364	9.03436	34.0896	17.8334	9.177
MSTRG.2055	PGSC0003DMT400071409	6.43271	7.76761	3.5146	10.1193	11.1468	9.56631	11.7292	9.25372	10.8062	7.59323	5.1727	8.78646	11.5886	9.52466	8.63408	11.4823	10.0641	6.80189	5.24065	5.83022	5.9585	11.118	9.62746	6.47192	8.02602	6.56631	5.64462	6.88415	7.96076	10.2467	9.65398	9.65278	9.03746	9.03914	10.9426	9.67942
MSTRG.2053	PGSC0003DMT400033191	2.08061	1.08171	0.862341	0.960036	0.0795	3.09072	6.74829	0.189507	0.611718	3.06562	2.91369	18.7866	0	0.361326	0.355587	0.489099	8.94272	0.351932	1.23944	2.29887	13.5494	1.85826	0.330012	0.638967	0.522183	0.236025	10.7139	1.06266	0.703832	1.35623	0.378263	0.840097	0.300272	0.502089	5.68016	0.816349
MSTRG.2059	PGSC0003DMT400071403	62.4671	86.1294	3.67549	1.35344	5.93056	5.25147	8.74579	31.0325	24.2738	6.0861	7.55769	75.2151	0	2.00714	4.83619	1.78484	0	1.33821	0.200383	7.19486	5.20161	0.626505	4.43738	0.910582	0.578547	19.7361	0.564811	76.3043	45.2134	156.472	1.70659	1.68607	3.34302	34.1842	11.2987	48.3003
PGSC0003DMG400027780	PGSC0003DMT400071402	1.41336	1.14047	0.625565	0.613058	0.653859	0.692711	0.399127	0.748558	0.355148	1.04526	0.970751	1.26165	0.357587	0.446192	0.725744	0.220819	0.337353	0.356899	0.680891	0.87664	0.898965	0.77169	0.45216	0.813034	0.393971	0.328685	0.225023	1.4023	0.494702	0.116642	0.65032	0.873996	0.394281	0.636309	0.696838	0.473726
MSTRG.2057	PGSC0003DMT400071382	0	0	9.77904	0	0	0	0	0	0.060456	15.9977	0	0	0	4.92335	4.91854	1.34033	9.67352	0.480589	9.26714	13.2043	8.39276	9.87466	0	0	0.538791	0.264331	0.914423	0	6.31307	0	0	0	3.82255	0.006596	0.818431	7.41807
MSTRG.2056	PGSC0003DMT400071406	0.534364	1.13706	0	1.1543	0.437561	0	0	0	0.498736	0.338192	0	1.49386	0.577096	0.55026	0.610062	0	0	0.795539	0	0.315329	1.17865	0	0.269698	0.579761	0	1.09899	0.817688	0.388279	0.509087	0.784603	0.35592	0	0.417148	0	0	0.645307
MSTRG.2058	PGSC0003DMT400071404	5.42606	3.2988	5.2889	4.03451	3.06288	3.33535	3.89484	3.52067	4.21044	4.51762	3.0976	5.08179	2.17515	3.01903	3.41095	3.80669	4.05435	3.3728	4.60474	3.97654	3.24802	3.69783	4.42046	3.66577	4.36556	3.8996	3.0751	3.16328	4.29316	4.86382	3.41889	4.03084	2.82183	4.1676	3.15421	4.36094
MSTRG.2060	PGSC0003DMT400071379	27.5183	25.1349	89.5222	32.5984	33.4683	33.6773	34.6034	37.4708	30.9	111.78	110.573	31.7373	30.5535	32.0013	31.7827	29.4621	27.4199	26.8464	29.7699	85.9667	89.2525	28.6078	27.3666	29.431	29.3979	35.0109	26.617	24.4758	25.2169	28.7906	29.3099	32.1595	33.331	26.8978	33.4882	32.7595
MSTRG.2063	PGSC0003DMT400071377	2.78335	2.2156	4.60048	1.67335	1.22201	1.68093	0.55019	0.886195	1.00034	4.65544	4.11802	1.91043	0.241395	1.75688	0.593483	2.17795	0.556017	0.98266	6.31849	9.08146	8.41979	0.2798	0.4064	1.17687	0.791885	0.976144	1.48478	3.75878	2.02812	1.74093	1.18238	0.940779	0.899122	0.608966	0.372008	0.527066
MSTRG.2064	PGSC0003DMT400071375	7.5372	9.37521	23.9264	29.3849	29.0191	24.2423	21.8563	16.6372	19.3085	38.708	31.1412	9.25605	21.1312	27.2843	22.2393	22.0485	16.8514	18.8148	14.1849	25.1036	30.5094	23.2636	18.5015	24.8503	17.3246	13.086	18.6883	11.3012	10.4529	9.74617	28.4595	33.4002	20.0384	18.9039	25.016	17.0329
MSTRG.2062	PGSC0003DMT400071378	22.5054	55.3396	53.8757	107.288	82.8034	91.152	114.523	116.184	105.147	71.8553	61.7431	48.3592	58.7163	69.6448	92.3745	96.7295	79.0248	99.9728	47.8773	100.691	59.3403	70.9206	70.8021	77.515	70.8752	100.196	63.665	11.7554	27.4341	1.90108	89.1903	76.0187	101.203	71.246	99.3681	82.1353
MSTRG.2066	PGSC0003DMT400071410	10.9584	8.44053	8.39487	3.40882	2.97674	2.96152	3.28275	4.2809	3.67203	6.30802	7.36635	7.97628	4.23549	4.52573	4.06282	6.73334	6.34289	7.45104	4.97222	7.28789	5.83082	4.35676	4.28838	4.1096	4.59012	6.58068	5.37527	7.07507	6.61484	7.94158	3.38145	2.95717	4.12412	5.48966	3.49299	4.07578
MSTRG.2068	PGSC0003DMT400071397	1.94982	2.30646	7.69178	2.27648	5.97392	3.37869	5.78127	6.21141	5.89102	12.2389	10.6399	2.25859	3.15773	2.79544	2.76673	5.25631	4.26465	2.41676	1.68682	11.1099	13.4481	2.29275	5.2403	3.24999	3.79558	4.12109	2.28532	2.23509	0.98326	2.14613	1.35866	3.19951	4.40613	7.69106	7.57792	8.43828
MSTRG.2067	PGSC0003DMT400071370	3.74691	2.58661	3.49557	21.7327	23.0286	20.7706	10.9444	14.9648	13.037	6.69886	7.10761	4.56769	13.1648	14.7074	15.7211	23.6413	16.6747	14.3459	5.03419	3.47755	5.16739	7.40052	11.9807	14.1407	15.425	10.6193	18.6819	5.37915	3.63789	3.17298	16.3369	23.4236	16.1731	14.3174	13.798	17.602
MSTRG.2070	PGSC0003DMT400071389	0	0.74909	6.58465	0	0.059812	0	0	0	0	0	0	0	7.03987	0	2.01002	0	0	0.204138	0	0	3.30871	8.41163	0	7.43848	4.72176	9.26821	7.35196	0	9.15288	0	5.38486	0	0	4.06014	1.74213	0
MSTRG.2070	PGSC0003DMT400071391	10.5521	5.84718	13.4554	11.7669	10.4737	9.29272	7.51	8.01109	10.5052	15.1713	11.1274	10.3963	8.86634	5.95647	11.3385	10.0659	5.90642	6.53784	5.89708	20.8423	13.1172	7.10804	11.5633	13.7849	10.614	9.32046	9.75508	11.5358	12.8351	5.2051	12.3565	11.7618	12.3931	14.5322	12.8374	13.2183
MSTRG.2069	PGSC0003DMT400071394	27.5726	21.1275	21.7981	12.9515	2.21578	12.8877	9.30877	14.9052	4.15747	9.59809	13.6447	27.5611	17.1072	14.242	13.1296	17.9956	13.3925	14.4894	34.0599	9.13465	12.6612	8.00693	14.974	11.2074	6.88087	19.8046	6.44707	25.3555	19.6059	2.43385	11.8685	8.31029	3.48299	4.80385	5.91025	16.8504
MSTRG.2072	PGSC0003DMT400071364	0	0.2629	11.4623	16.1947	15.9207	0.278994	5.88639	7.36554	6.72961	0	0	0	13.5612	7.54919	0.017749	0.096153	6.05762	5.18153	0	0	0.014654	0.135547	0.129422	0	0.098185	0.060372	0	0.091787	10.1949	10.7746	0	11.6096	0	0.15592	0.149091	0
MSTRG.2071	PGSC0003DMT400071366	85.2906	34.3579	57.418	72.5957	69.5809	60.8882	122.235	73.7166	82.459	34.7037	29.2272	45.4948	58.387	79.3449	75.9277	0	73.0471	59.4197	58.7473	46.8033	42.4549	127.366	78.5559	91.3229	68.5869	104.354	47.2869	53.1768	63.4651	48.424	80.1697	90.2132	98.7862	76.099	102.254	96.7694
MSTRG.2074	PGSC0003DMT400043948	3.56546	4.01506	22.4694	8.33935	3.92607	8.85696	5.96943	7.50209	7.98911	31.9794	8.13653	3.38862	3.95921	5.38431	4.57887	7.02328	5.1887	4.71702	4.62125	26.9505	27.7563	2.85331	4.07912	6.45363	5.54921	2.16543	6.10771	2.47929	4.34254	4.79874	3.37784	7.65119	6.44158	7.62467	6.67421	3.4341
MSTRG.2073	PGSC0003DMT400043937	0.637543	0.904895	7.22378	3.39076	2.22374	3.17411	3.88856	0.379592	0.489309	0.612851	3.94569	5.98588	3.41359	6.90372	3.22397	5.33755	25.5238	3.27099	2.79083	2.19978	1.42387	0.361494	1.79661	3.11473	2.58738	2.47602	5.86183	2.01881	3.17853	0.182519	1.21186	6.22257	0.953989	3.49883	1.76682	0.170062
MSTRG.2077	PGSC0003DMT400043949	4.60238	4.59239	3.85456	4.25279	4.13344	7.12167	4.68366	3.44514	2.51059	1.447	1.79764	5.66927	7.76169	5.02141	4.36541	5.96052	6.53157	7.32362	7.21156	2.09946	2.73381	3.52529	4.1293	5.81653	4.72997	6.31663	4.12534	6.691	6.57377	5.68945	3.93956	4.44845	5.36584	1.83127	5.07901	3.325
MSTRG.2075	PGSC0003DMT400043942	0	17.2432	0	6.48767	8.1561	10.4043	1.05395	5.67613	8.24021	2.68373	1.39986	15.7098	7.77317	0.740232	0.885663	9.4136	5.90857	0	24.4737	0	4.1884	8.21777	10.2532	9.44533	7.3121	13.2934	2.12301	18.3635	19.0438	1.60477	5.90547	4.46693	10.1759	0	2.59803	6.46274
MSTRG.2078	PGSC0003DMT400043929	0.265432	17.4156	9.49562	9.07062	8.09381	9.931	5.16853	8.30143	9.25722	7.13283	7.39549	12.9236	8.2041	9.70522	10.5384	11.907	8.17335	11.2712	19.0471	7.60665	6.71144	13.0919	12.2774	9.37966	10.7823	10.664	5.96399	16.1879	15.2929	10.707	10.4809	9.51867	9.4549	10.0565	9.22129	9.03003
MSTRG.2080	PGSC0003DMT400043940	2.58668	4.68697	2.35449	0	0.910187	0.281401	0	0.436639	0	12.5138	11.6138	0.877666	2.28802	1.50137	1.68493	1.55688	1.74063	1.46261	0.747337	9.51473	6.56069	1.75609	2.36424	0.63481	2.9795	0.316846	1.04404	1.76032	0.877871	2.69797	0.654989	0.435655	0.824664	2.98622	1.44098	0.359124
MSTRG.2079	PGSC0003DMT400043928	28.3577	26.6854	19.1089	12.6395	10.8092	12.034	9.27164	9.80242	12.2793	22.2276	17.3963	22.6205	13.401	11.1193	11.7672	15.3349	11.6929	13.189	19.1823	16.9152	17.2602	16.7493	15.1445	10.0634	13.6882	13.8176	12.734	20.4466	12.1896	12.9425	12.9254	10.5182	12.9461	13.9824	11.114	12.2954
MSTRG.2081	PGSC0003DMT400000002	4.72386	0	0	0	6.52067	18.1266	0	6.01914	10.5183	10.8174	4.87997	4.64719	14.2586	3.98541	9.19596	0	8.9774	4.3663	10.493	12.1565	15.508	3.00706	2.10931	22.9176	1.71963	2.67846	2.61289	5.52881	3.64274	0	3.36666	21.0364	9.09833	15.0056	4.09918	4.9612
MSTRG.2081	PGSC0003DMT400000700	10.9598	0.207675	0.548513	7.04385	14.8635	11.68	0.220447	25.8099	18.7229	9.08729	15.0093	8.99611	8.96364	8.8905	13.405	0.72176	8.69425	7.65954	9.8124	11.3784	8.022	11.773	15.587	12.7374	7.14645	18.4177	4.68147	10.4839	7.71984	0.007004	13.7538	13.9665	12.5124	21.4266	22.1787	30.581
MSTRG.2084	PGSC0003DMT400000009	0	0.38203	0	0	0	0.254939	0	0	0	0	0	0	0	0	0	0	0	0	0	0.249828	0	0	0	0	3.97103	0.04101	0	0	0	0	0	0	0.00867	0	0	0
MSTRG.2085	PGSC0003DMT400000010	31.0793	26.7297	49.5654	40.7839	39.3374	44.0259	37.9003	33.276	39.5207	59.4134	55.6453	26.7058	25.6991	33.2622	31.7565	27.9787	26.8415	24.8495	31.379	53.7326	52.8418	33.6288	34.3125	35.0314	27.9685	29.4711	28.7386	24.713	28.0891	25.6046	31.7211	38.458	32.6534	32.6732	38.9306	38.2067
MSTRG.2082	PGSC0003DMT400000004	4.43201	10.7895	0	0	5.47992	0	2.44045	0	2.73414	2.24653	0.563814	0	5.84959	2.7536	2.92266	0	0	0	2.8407	4.53094	0	9.59765	2.8965	7.83142	10.3159	0	0	3.71962	2.81541	4.48435	1.90475	2.60402	5.50222	4.44462	4.19759	0
MSTRG.2083	PGSC0003DMT400000376	11.2997	1.45434	5.07174	15.1298	0	12.6209	6.21078	0.156261	1.61852	0.982097	14.0885	32.1327	1.11921	0.062355	0.939175	1.43165	17.9089	1.09067	1.05165	12.9172	0.53598	0	0.975075	0.63374	0.986102	0	1.26936	29.3442	0	14.5134	0.960429	0.253398	12.7165	5.52661	0.585653	10.4502
MSTRG.2086	PGSC0003DMT400000377	41.7453	40.5057	35.1534	30.8136	51.0989	30.4389	74.6793	44.3299	60.1142	23.1441	34.2331	85.7879	28.2478	31.0565	38.8025	39.5773	47.253	57.4613	59.0174	37.2422	32.6728	48.0666	53.7688	34.6094	27.6225	54.1308	75.7578	36.4609	44.2371	40.3083	55.3793	53.6884	41.2113	42.6247	73.9131	49.5965
MSTRG.2087	PGSC0003DMT400000012	11.114	3.69377	0	0	3.38633	0	4.33405	0	0	0	8.8245	0	10.8127	3.35877	9.81567	8.18989	0	2.11504	8.79774	0	6.18924	7.2554	2.90294	8.59463	3.64541	0.710016	0	4.51548	2.03312	0	2.376	11.763	11.4522	9.97019	0	9.51049
MSTRG.2089	PGSC0003DMT400095626	1.28516	0	0	0	0	0	1.05429	1.06551	0	0	0	0.628733	0.455414	0.446745	0	0	0	0	0.756249	0	0	0	0	0.845118	0.835641	0	0.315794	0	0	0	0	0	0	0	0	0
MSTRG.2088	PGSC0003DMT400000378	0.157443	0.295292	0.87633	1.46589	2.17219	1.95563	6.32373	0.907489	0.145131	0.696298	1.14167	0.243354	0	0.33685	0.078504	3.60503	3.45893	0.324138	2.18719	0.50142	0.658084	0.218129	0.231715	0	1.29065	5.68721	0.745715	0.123875	1.68137	0	0.99179	0.442904	0.318685	1.15326	0.483482	1.22987
MSTRG.2091	PGSC0003DMT400000016	0	1.72002	1.1516	2.23412	0.622322	0.416591	3.77779	5.61121	0	0	0	0.082296	0	5.30308	0	0	0.772611	0	9.16298	0	0	0	2.49305	6.05701	5.34559	0	1.75298	9.57042	0	10.0871	0	7.99734	1.45543	2.47143	0	0
MSTRG.2096	PGSC0003DMT400000030	0	0	0	0	0	0	0	0	5.25057	0	0	0	0	2.07983	0	0	0	0	0	0	0	0	0	0	0	0	0	0	0	0	0	0	0	0	0	0
MSTRG.2095	PGSC0003DMT400000028	49.2747	6.29453	0	1.11068	13.4526	0	4.79745	0.27665	18.2693	3.60559	16.9707	0.580111	14.8288	21.4811	2.19401	0.808106	27.2711	24.7835	34.9555	0	0.107971	20.9496	20.9556	17.6409	18.9092	3.206	0.920546	37.152	31.5484	0	7.15512	0.447525	20.3833	13.0412	1.19528	0
MSTRG.2097	PGSC0003DMT400000034	7.33857	12.5633	23.0398	15.025	15.241	13.3604	13.4643	14.1688	14.5418	34.1315	28.6868	7.64254	12.0516	14.4968	12.3783	16.5113	10.9602	12.4422	7.21615	26.667	27.217	16.3809	13.992	12.5671	13.3982	13.7204	12.889	10.1864	8.16806	5.40172	5.06584	15.3694	11.7843	16.2715	17.373	17.2832
MSTRG.2102	PGSC0003DMT400000390	0.45444	0.447344	0.809991	1.12297	0.980726	0.175876	0.313156	1.3881	0.456196	1.45459	1.52355	0.330153	0.751508	0.840636	0.950405	0.620536	0.81027	1.01926	1.0352	0	0.662146	1.24899	1.36311	1.01475	0.691136	0.396502	0.893336	0.263411	0.487861	0.587768	0.884801	0.603035	1.92697	1.76508	0.935937	1.2107
MSTRG.2093	PGSC0003DMT400000024	1.55992	1.07805	0.969618	3.16378	4.41879	3.60942	2.91748	1.79082	1.73958	2.67838	1.8747	1.88437	2.32701	3.16061	1.45738	5.74207	1.59862	1.93647	1.82556	1.37981	1.20172	2.19796	1.59769	1.83678	3.24685	2.5013	1.57055	2.49743	1.26881	1.52872	5.348	3.72118	3.81333	1.14164	1.34571	2.37625
MSTRG.2094	PGSC0003DMT400000025	71.842	51.4678	46.1331	33.67	31.385	34.8512	18.568	17.9403	20.5757	30.2516	33.3431	57.0117	55.1795	17.2176	27.9563	63.9913	52.1232	54.2337	80.5966	29.8646	30.0049	39.8769	34.2982	26.1545	54.2647	41.4305	51.135	59.7419	74.3339	114.67	25.4237	25.6257	33.3119	31.6609	20.9113	20.9343
MSTRG.2103	PGSC0003DMT400000391	5.0205	7.40363	1.82648	4.83357	4.52455	3.03759	2.48407	1.93037	1.7171	2.68705	2.59038	4.95698	4.12526	4.56474	2.7467	4.15582	3.06169	2.72145	2.84236	1.82342	1.55623	4.69168	3.53093	4.17654	4.00729	3.31972	2.27717	8.23221	3.81857	2.75643	4.55338	4.60159	2.35613	3.17443	2.93907	1.77207
MSTRG.2100	PGSC0003DMT400000387	103.171	96.1063	54.9651	46.6695	44.4252	44.5094	41.3566	44.3514	49.3591	41.2048	42.8519	101.259	49.0833	43.4798	45.0423	59.0841	42.7627	61.4751	78.2089	37.8113	35.0306	48.5818	52.3773	42.324	56.4974	66.905	50.727	80.6503	57.1854	46.9048	47.4993	44.6031	49.7025	48.5154	40.8995	46.2939
MSTRG.2105	PGSC0003DMT400000396	20.3204	24.0308	59.3199	38.8453	48.1659	53.9721	52.8739	72.3744	54.8149	72.5145	86.2048	25.4497	38.0919	36.1189	58.5344	35.1179	23.7215	26.2162	16.313	78.8541	67.9035	31.6743	46.2355	59.6579	23.2589	51.2322	26.2938	21.5776	21.3989	23.2451	41.741	50.3339	51.0658	39.1677	61.4008	70.9671
MSTRG.2107	PGSC0003DMT400000041	0.175414	2.1374	2.45893	2.82468	0.083713	2.44071	0.189427	2.6079	0.122384	1.7851	8.11713	0.100296	0.286128	0.256033	0.06858	0.113625	10.4119	0.090825	0.268276	9.10537	8.73311	2.52364	0.211732	0.610673	0.170766	0.836088	17.6241	1.56821	5.94912	4.98922	0.232933	0.063691	1.14885	1.08883	1.98355	0.113252
MSTRG.2109	PGSC0003DMT400000043	0	0	0	0.772655	0	0	0	0	0.880484	0	0	0	0	0	0.639009	0	0	0	0	0	0.218923	0.388344	1.26848	0	0	0	0	0	0	0	0	0	0	0.392571	0	0
MSTRG.2110	PGSC0003DMT400000054	1.14763	2.0857	2.14251	2.81709	3.24141	3.12822	3.4638	1.52041	6.75053	1.72427	1.57022	1.13081	6.26458	0	4.61908	2.53722	0	3.93306	0.627914	0.573639	2.04639	4.01851	6.09257	2.19782	2.41744	0.183367	1.39213	1.55893	0	1.41209	4.03937	3.16413	3.01207	3.27671	1.60407	3.00228
MSTRG.2112	PGSC0003DMT400000060	0	0	3.54314	2.79065	0.599423	5.19574	1.65419	0.380987	0.602317	5.79734	0	1.13803	0.155836	0.830692	0.225305	1.31666	0.005974	0.756673	1.54427	0.48012	0.206138	0.581141	0.301276	0.331313	0.726066	0.802859	0	1.02294	0.216848	0	2.63868	1.17547	0.061021	0	1.0539	0.205065
MSTRG.2112	PGSC0003DMT400000061	4.02719	0	0	0.000962	0.857848	3.80032	0.088892	0	1.55075	7.10099	0	0.990777	2.96913	2.96367	2.22881	2.95175	0.220195	1.75775	0.402595	4.40449	4.81187	2.9295	0.36151	3.39569	2.51101	1.02134	1.2683	0.886952	0.649358	0	1.131	3.74634	2.07987	3.66175	0.202705	3.51437
MSTRG.2111	PGSC0003DMT400000436	0	0	0	0	0	0	0	0	0	0	0	0	0.139691	0	0	0	0	0	0	0	0	2.85985	0	0	0	0.000476	0	3.79725	0	0	0	2e-05	0	0	0	0
MSTRG.2111	PGSC0003DMT400000430	2.91322	0.491931	1.95215	1.29771	2.0695	0.268486	0.469838	1.6177	0.972791	0.351252	0.754308	3.0578	1.32759	0.800337	1.34374	0.901374	1.57156	1.37626	1.84293	0.866643	0.903125	1.79483	2.7163	1.90919	2.02409	7.12223	0.993055	2.92627	2.53812	1.75466	2.15725	1.91894	1.80256	1.2485	0.651143	0.976789
MSTRG.2113	PGSC0003DMT400000446	69.2933	61.7411	32.9395	34.502	30.0467	33.7353	29.25	24.9271	28.965	17.625	23.5651	61.4283	42.6151	26.3047	34.0482	35.3503	30.7107	32.4135	43.4264	15.8076	15.4769	43.5509	32.1913	32.583	28.9122	37.1453	34.1387	59.3814	56.4435	54.6527	35.9734	31.5479	34.4031	28.4044	24.1871	22.3055
MSTRG.2114	PGSC0003DMT400000063	0	1.15374	0	0	0.676873	3.6344	10.4152	2.38747	1.66254	9.2408	0	0	0.991372	0.598737	1.46456	1.96318	1.72554	0	0	0.859865	0	0.836704	0	0	0.351361	0	2.12156	2.10744	1.91111	3.29834	0	0.924437	1.96771	1.5439	0	0.621153
MSTRG.2115	PGSC0003DMT400000064	5.77151	0	5.38596	13.2996	12.2611	8.35101	8.49274	6.46202	8.31747	5.84986	3.07884	3.82537	7.76091	12.345	9.13619	11.3032	7.85645	6.78504	0	5.71697	6.27773	13.2424	10.8328	12.3915	2.82576	3.79482	8.07022	6.10281	4.61243	3.36516	9.17746	13.5619	9.98354	4.83903	4.96397	5.51783
MSTRG.2118	PGSC0003DMT400000067	0.539529	0.486972	2.25491	3.74704	11.8155	1.75381	0	0.385476	0	1.00895	0	0.869755	2.71157	3.5691	0.134855	2.79627	1.26581	1.90207	4.35068	0.993344	2.50373	1.33006	0.754233	2.67219	1.81258	0	3.03493	3.55507	7.97714	5.21463	1.7387	6.19883	0.779645	1.09766	0.955072	0
MSTRG.2119	PGSC0003DMT400000078	10.6437	7.31295	29.7371	2.27388	2.3649	10.225	0.946917	0	0	19.3505	0	0	4.98089	2.14947	12.8496	0	0	5.91281	20.4936	3.57275	33.6361	3.46705	2.85942	11.0243	0.852144	0	6.04102	13.6872	34.3786	20.0349	8.7302	4.25894	9.49239	2.91587	0	0.268427
MSTRG.2116	PGSC0003DMT400000066	0	0	0	0	0	0	0	0	0	34.7018	0	0	0	0	0	0	0	0	0	0	0	0	0	0	0	0	0	0	0	0	0	0	0	0	0	0
MSTRG.2121	PGSC0003DMT400000447	46.2181	46.4123	29.6637	22.7981	24.2167	23.7519	16.6061	22.3031	21.8236	30.7291	25.5362	35.9807	16.2809	23.0956	22.1739	21.0481	17.8784	21.5653	32.6573	27.9071	27.4178	23.0737	22.3762	35.9872	19.2018	21.1526	27.4374	33.8852	35.7641	19.1125	27.1692	23.7611	20.545	19.2307	16.8676	25.1258
MSTRG.2122	PGSC0003DMT400000448	16.6549	11.9534	7.23789	5.50003	2.88003	2.34648	6.6647	8.19991	6.10787	5.18424	8.03924	7.80266	3.37676	4.70904	3.86302	3.93425	6.12554	4.78986	7.77072	14.2974	2.76877	10.3429	30.2019	3.05036	3.75919	7.14521	11.2864	8.45857	14.3439	15.1974	0.620176	2.47763	2.16093	11.7534	0.777551	2.19469
MSTRG.2125	PGSC0003DMT400000457	28.5963	0.215078	0	0	0.729773	0	0	3.70992	0.433291	0.594096	0	0.129736	1.00452	0.037046	0	0	2.65891	1.25062	11.6033	0	10.5478	1.86732	2.39375	24.1557	4.11742	2.08257	5.43603	0.173662	0	0	13.2705	0.021279	8.6689	12.2521	11.7474	3.66312
MSTRG.2126	PGSC0003DMT400000089	0	0	8.61452	3.88262	0	0	5.51342	0.363302	3.75154	0	3.79236	3.7337	0	9.24275	1.24507	0	0	0	0	7.29207	0.058791	0	0	7.50175	16.685	0	0	0	2.64977	22.9669	0	0	0	0	6.14607	3.2587
MSTRG.2128	PGSC0003DMT400000462	190.711	250.117	235.004	193.555	191.595	171.052	104.775	105.607	147.546	268.434	190.908	213.752	218.47	211.768	144.739	266.547	245.466	277.989	200.348	324.932	387.532	299.376	224.333	213.756	338.642	157.882	281.114	235.054	210.907	294.295	208.705	158.024	198.467	246.364	163.974	126.615
MSTRG.2132	PGSC0003DMT400000118	0.23884	1.79312	0	0	0.549807	0.369742	0	0.397034	0.477728	0.529061	0.688041	0	0	0	0.4587	0.47276	0.665401	0.033373	0.37479	0.490006	1.09164	0.23263	0.602727	0	0.6376	0.785957	0	0.603903	0.123428	1.00125	0	0.175589	0.17274	0.727386	0.636914	0.425627
MSTRG.2133	PGSC0003DMT400000466	1.68381	3.58697	1.26954	0.716579	1.86926	2.2789	0.66691	0.756061	0.995083	2.35052	1.38761	0.832693	1.33898	1.36962	2.44004	0.594937	0.510607	0.958674	2.81801	1.34513	1.92801	1.57254	1.79363	1.17892	0.846208	1.9117	1.93101	2.87098	3.45972	2.35379	1.47285	0.626	1.33847	0.827899	0.801668	0.712984
MSTRG.2136	PGSC0003DMT400000471	5.96034	4.73568	12.1593	17.4549	18.0197	14.5423	16.1495	19.2801	24.5482	9.10718	9.28219	6.39687	16.1274	18.0044	16.5576	6.63551	6.99449	12.6923	4.51585	10.9819	11.7249	10.8818	18.669	22.132	9.56164	5.89452	8.04263	2.27419	9.82742	6.36939	15.1922	12.3748	16.4079	21.568	17.3955	25.5158
MSTRG.2131	PGSC0003DMT400000116	1.10619	1.16813	5.70604	17.1936	0	0	0.674604	3.79747	2.10718	3.99198	1.50036	19.4556	17.7517	2.23051	19.5578	10.6542	0.642384	0.441132	16.5083	4.71432	9.30944	0.755668	2.00885	1.47237	0.521262	1.23742	0.13849	23.3073	3.11443	3.97083	0.587893	24.6862	1.76683	25.0322	3.24636	17.5979
MSTRG.2130	PGSC0003DMT400000108	100.285	88.5994	52.8043	82.3212	97.1575	65.5735	45.9007	79.2375	68.0577	32.437	39.1391	122.022	63.721	74.4936	60.3806	86.9093	57.191	70.363	54.891	28.2692	26.7309	61.0242	58.2877	61.0197	79.7751	125.167	94.541	124.935	92.2162	71.1267	78.4257	72.6751	66.486	82.6837	70.0149	108.098
MSTRG.2130	PGSC0003DMT400000107	3.09982	3.45495	1.11401	0.256607	0.4193	1.10339	0.614785	0.197471	1.43042	0.631531	0.472015	6.97397	0.449023	0.919711	0.999483	3.51373	1.70202	2.06098	1.77627	0.654263	0.493589	2.39849	1.43893	0.674938	2.37751	3.91839	1.40113	2.18363	2.62804	5.19003	0.986837	1.28088	0.375483	1.54841	0.68988	1.92343
MSTRG.2137	PGSC0003DMT400000473	3.00292	15.5354	0	0	0.261735	0.415744	0	0.734699	0	0	0	0	0	2.61373	0.378518	0	0	0	0	0	0	0	1.76706	0	0	0	0	1.43125	1.59928	0.319145	0.477129	0	0.292247	0.47183	0.306409	0
MSTRG.2139	PGSC0003DMT400086595	2.56119	1.8909	0	1.29264	0.184243	0.485698	0.258136	0.798291	0.296045	0.283666	0.636048	0	0.453799	0.356129	1.32655	0.890766	0.509669	0.37278	2.34108	0	0	1.58651	0.959798	0.609389	0.485932	0.375362	0	1.59874	0.393919	1.61052	0.332446	0.222812	0.224529	1.66308	1.70747	1.33502
MSTRG.2140	PGSC0003DMT400000477	20.1481	19.735	13.9235	21.3962	19.6063	17.3635	15.9851	15.9075	20.9623	8.64167	8.70539	22.2131	26.8281	22.4791	25.0862	22.884	19.8696	23.6489	23.3216	6.77592	8.92292	23.7733	26.7997	23.1325	21.1685	27.9149	20.1037	21.9322	24.2298	14.6525	18.7794	21.6502	23.1678	16.9956	18.8165	19.9034
MSTRG.2141	PGSC0003DMT400000126	0	0	1.12932	0.277683	0	0	0	0	0.741581	0	0.621215	0	0	0	0	0.301769	0	0.55104	0.209632	0	0.937305	0.476454	0.259506	0	0.887401	0.898105	0.111294	0	0	0	0.156341	0.828569	0.658366	0.978613	1.11021	0
MSTRG.2142	PGSC0003DMT400000478	7.18862	7.3387	19.1377	13.1719	11.3997	11.8311	16.8396	16.747	15.555	26.124	24.821	8.49108	10.3944	10.952	10.5566	13.6344	13.4543	14.5821	7.35957	23.6261	27.5614	12.369	12.8848	10.6322	11.5334	11.4908	10.2869	7.1468	6.80926	5.40919	10.6243	10.5801	11.1554	11.8756	15.9037	12.3541
MSTRG.2143	PGSC0003DMT400000479	0.392689	0	0	2.0519	48.3969	35.2739	33.9249	35.2241	32.4966	0.5752	1.01013	0	2.53021	44.6656	24.7956	1.7256	31.9951	34.3383	0.91943	0	13.5449	40.8272	33.0235	33.5584	35.4802	23.1256	7.47782	0.990869	0.957919	0	31.8581	36.1107	40.0477	31.6361	34.1095	27.6459
MSTRG.2144	PGSC0003DMT400000482	28.3092	26.416	33.1004	28.2409	28.3618	29.5403	31.728	29.4371	23.3946	36.7955	34.1084	25.5605	26.9854	25.8923	27.7232	25.2663	25.2717	29.7003	30.2914	38.7402	31.1082	15.9028	17.3181	40.5685	25.0174	31.0705	21.8031	29.465	21.9459	20.1243	31.6693	34.5721	38.4037	16.9934	23.6097	31.1987
MSTRG.2145	PGSC0003DMT400000129	0	2.93014	2.47667	5.3121	1.26351	2.16504	10.4461	1.79409	1.01046	2.02537	10.8001	1.19119	1.6787	2.33334	1.53552	1.32369	3.99164	5.61988	7.04213	2.34623	1.93178	0.104556	1.05036	5.63155	0.514881	1.7937	7.98726	1.35414	0.090929	2.67202	2.3377	1.75259	0.611902	1.37801	2.19855	2.74156
MSTRG.2146	PGSC0003DMT400000483	44.3397	46.1112	62.543	58.1653	54.4319	53.6064	54.4851	56.6937	78.46	63.1705	63.8019	46.4476	54.3662	50.7952	74.1622	46.9678	55.2055	54.4857	46.1345	70.9379	73.2682	82.5109	97.2747	69.5315	48.0144	70.4199	50.9883	40.3417	49.4009	74.8583	54.251	63.1585	66.2824	80.9282	61.4846	67.7466
MSTRG.2147	PGSC0003DMT400000130	0	0.462566	0	7.91377	0.56918	0	8.64108	0	4.59276	9.83721	12.127	0.132866	0	7.25507	2.90506	0.181051	11.9756	6.6492	0	0.946743	9.36863	7.05255	0.503326	11.3063	5.29446	5.38949	8.83937	2.0343	0	0.356049	8.10694	0	1.38284	4.60804	2.79867	8.17204
MSTRG.2152	PGSC0003DMT400000135	0.377533	1.1033	1.97367	0.381084	0.507281	0.739688	0.158018	0.664708	0.697098	2.37667	2.31629	0.81878	0.317737	0.492143	0.383564	0.352492	0.436009	0.490131	0.922578	2.07873	1.17876	0.751746	0.652444	0.943894	0.41715	0.328029	0.867226	0.532158	0.567695	0.327088	0.545608	0.553037	0.507594	0.621079	0.399508	0.672783
MSTRG.2148	PGSC0003DMT400000485	21.6176	19.6456	19.3987	23.6518	11.7541	19.9302	13.4837	15.9202	18.0909	22.2077	23.1309	22.8922	16.2694	17.1593	16.7302	13.5819	11.3662	12.3119	17.8367	19.9921	15.9393	17.2965	16.4471	22.0279	11.8664	11.7065	12.1573	11.5061	13.6599	8.82871	12.366	20.0798	17.0102	11.3512	12.2033	11.3945
MSTRG.2150	PGSC0003DMT400000488	3.74953	4.79112	0	0	1.9353	0	3.11029	0	2.51462	1.60441	0	2.66503	1.84853	0	3.94044	3.24205	0	2.6776	3.73054	0	0.001748	3.0243	0	0	2.95656	3.38219	2.90848	2.9371	0	3.17214	3.41899	2.59531	0	1.52607	0	0
MSTRG.2153	PGSC0003DMT400000489	3.91081	2.11876	1.48401	1.22208	2.42075	16.7495	1.18017	1.48821	17.593	1.25261	1.21924	2.36486	1.19554	1.65723	1.19494	5.44502	11.2347	1.87471	4.47079	1.30434	0.614908	2.58995	1.61444	0.635415	1.11832	0.621654	2.30971	20.479	1.49149	2.05657	1.3243	0.733914	1.51456	4.71826	0.759796	26.9451
MSTRG.2155	PGSC0003DMT400000143	7.59933	0	1.60847	1.55028	7.83012	6.6681	11.1875	2.66755	2.04779	5.24356	3.05773	4.85223	0	3.3574	11.0807	10.8335	3.5077	2.63687	1.04761	0	4.63848	9.87174	11.0702	3.26131	2.1271	5.6438	0	0	0	9.32882	5.69106	8.29833	4.6186	0	6.67547	0.941592
MSTRG.2156	PGSC0003DMT400000492	11.4456	16.8811	5.3084	11.4777	8.9436	12.8861	11.6318	13.9744	0.030321	4.42559	6.29785	11.1993	10.8531	10.4329	10.0157	15.7291	10.0477	14.2577	7.65658	3.90349	3.06144	0	0.002072	7.62662	5.15494	10.7675	11.612	9.10943	5.50565	4.61838	11.664	10.3442	0.119421	10.0839	14.2767	10.5381
MSTRG.2157	PGSC0003DMT400000146	18.8228	16.4459	13.2553	17.9842	17.1301	21.4709	25.4861	20.5539	22.4501	11.2201	13.0858	21.3338	12.7542	19.9611	15.7996	19.0296	12.593	15.282	13.3642	12.5792	10.4035	14.8552	15.2377	15.4555	16.0424	20.6208	13.1104	20.2855	9.58176	7.96062	22.2695	17.8194	13.7934	14.0612	18.3563	23.3853
MSTRG.2159	PGSC0003DMT400000151	6.66625	23.1608	3.53064	3.31803	1.66254	3.4723	3.77295	15.0607	18.4368	4.69771	2.71195	9.02896	20.6161	3.19452	11.5108	24.7695	27.9887	28.829	2.82843	3.80153	3.14703	13.7701	7.74008	1.6188	28.6565	3.01064	42.8126	8.67009	7.94833	5.88575	1.28081	0.632176	0.814282	22.8882	34.5792	15.1299
MSTRG.2160	PGSC0003DMT400000152	2.46839	1.74586	11.0746	20.6236	16.3779	16.4789	1.03488	11.0747	15.4943	11.7472	9.83265	3.75829	13.6863	7.64025	6.60133	34.8315	17.9292	21.5	12.9878	5.38566	7.12916	4.43842	4.23898	4.07275	14.7296	1.85551	20.1444	1.97759	3.71623	3.56232	7.62796	9.84196	13.5084	14.3829	10.3202	13.1306
MSTRG.2164	PGSC0003DMT400097242	0.370009	0	0.556071	3.07568	2.45623	3.55134	0	2.07127	1.36841	0.768794	0.725915	0.181018	1.5437	1.7081	0.994983	5.42901	2.957	5.1097	0.893183	0.419037	0.438583	0.320817	0.372559	0.694561	1.5028	0.323196	1.5111	0.116944	0	0.136863	2.13818	1.34831	1.7658	1.08661	2.41083	3.07707
MSTRG.2165	PGSC0003DMT400000500	2.07068	1.73535	3.40109	8.90671	8.96655	7.17474	9.936	5.26408	5.85205	3.53796	3.2837	2.34882	4.01726	7.47187	5.23733	5.5932	5.99352	9.46329	5.40181	3.22277	3.6341	3.55526	6.0994	6.93309	6.70227	6.08856	5.30333	2.54157	2.33862	3.09717	6.04948	10.5099	6.39355	4.14042	5.68575	7.34969
MSTRG.2162	PGSC0003DMT400000154	15.5016	16.1338	25.8974	19.8664	14.0099	17.6675	10.911	10.2642	12.3428	19.3166	12.9762	17.1925	17.9376	16.9451	20.276	15.8028	13.948	15.5185	25.8079	15.136	21.3847	17.1519	23.2134	25.31	12.9862	19.1709	15.3838	19.0688	28.7362	18.4428	19.6673	19.5819	21.2329	11.4951	10.5243	11.8847
MSTRG.2168	PGSC0003DMT400000158	0.343821	0	0.395562	1.9147	2.20275	1.15842	1.34912	1.45516	1.37695	0	0.639699	2.05052	0	1.1722	1.00274	1.6291	1.46121	2.16784	0.122341	0.155415	0	0.806353	1.50793	0.779662	1.25936	0.584383	1.44281	2.36199	0.430239	0	1.82736	1.18857	0	1.19193	1.04748	0
MSTRG.2167	PGSC0003DMT400000156	2.00512	5.01368	5.04439	0	28.8324	28.2971	20.4978	68.6299	91.883	2.9256	3.72146	0	57.9503	26.6139	22.709	20.496	15.7947	5.43073	0.452177	2.84715	0.008539	11.611	26.9775	11.2763	13.3093	93.544	11.925	0	0	4.73532	57.7919	18.4719	106.893	56.6153	130.83	80.0853
MSTRG.2169	PGSC0003DMT400000163	3.85516	0	0	3.41569	1.40217	3.36793	2.64419	1.08526	1.54607	2.26085	1.37585	1.67175	0.022546	0	2.03165	1.49168	0	1.19203	2.98543	1.74915	1.1336	0.924675	0	1.3086	0.697672	1.65761	0	3.33863	1.77781	2.35075	0.637225	1.46398	1.99044	2.17604	2.02682	0
MSTRG.2166	PGSC0003DMT400000502	22.6094	22.905	22.9817	23.4138	18.0646	19.1623	22.6343	21.9956	24.4918	14.6067	22.8335	24.1225	18.2274	18.0851	22.3094	20.119	21.0506	24.0608	13.3881	23.9641	18.5667	20.3486	22.282	16.5601	19.3388	27.7098	16.5937	15.6374	15.066	17.2296	22.3229	20.6181	27.0137	20.5486	18.7655	25.4033
MSTRG.2172	PGSC0003DMT400000507	0	1.25416	0	0.842403	1.15101	1.06439	0.391872	0.516475	0.382302	0	0	0	1.05326	0.550556	0.555243	1.49466	0.553391	0	0	0	0.059476	0.729393	0.521057	0.955509	0.397438	0.245028	0.75044	0	0	0.199955	0.917965	0.877597	0.254458	0.575847	0.650828	0.950921
MSTRG.2170	PGSC0003DMT400000170	2.27275	0.739004	6.17309	1.37167	0.844211	2.34752	1.20062	0.89513	0.358747	0.768666	1.30011	3.13959	1.38314	0.630836	0.412064	1.49335	1.17759	2.36873	3.11521	1.21698	0.405882	0.722506	0.335349	2.99867	0.409561	0.936759	3.05429	0.771811	0.89062	1.83628	0.583113	1.59392	0.688099	0.743272	0.820906	1.03353
MSTRG.2170	PGSC0003DMT400000167	1.89237	0.460559	0.747232	1.69467	0.344378	0.54099	1.92955	0.440882	1.05133	1.00991	0.410069	0.649587	0.892433	0.450698	0.31275	0.576952	0.43594	0.348271	0.25354	0.808143	0.133911	0.59095	0.550113	0.510112	0.61915	0.488707	0.562652	0.477428	0.217341	0.045171	0.728869	0.327856	0.26389	0.298411	0.500633	0.318516
MSTRG.2171	PGSC0003DMT400000505	20.1673	25.2995	19.5301	116.783	86.482	75.624	25.8754	83.8597	31.142	15.0349	20.7758	25.035	98.1436	29.1349	25.347	30.7382	20.0842	79.3925	30.0913	6.90859	23.7453	39.2357	33.3629	93.7546	60.596	62.2784	13.5884	47.0483	45.3242	53.8567	93.2214	74.355	134.032	35.1657	115.89	77.9524
MSTRG.2173	PGSC0003DMT400000510	0	3.56606	2.8392	0	4.36304	0	0	0	0	0	0	0	0	0	0	0	0	0.184623	2.90012	0	1.03026	4.48874	5.63992	0	0.023434	6.57282	0	0	0	0	4.99274	2.57351	0	4.17737	0.024101	0
MSTRG.2174	PGSC0003DMT400000512	2.48444	0	0	0	0	0.518897	0.615865	0.910616	0.948727	0	0	0	0	1.37607	0.756083	0.783144	0	0	0.879066	0	0.159137	0.81708	3.3773	1.92198	0.302952	0	0.220982	0.222058	0.199942	0.154951	0.617757	0.117077	1.26793	2.19009	0.78712	0.620931
MSTRG.2176	PGSC0003DMT400000176	0	0.267752	0	3.14177	0.018695	2.05978	0	0.069498	0.027834	6.38689	20.7163	1.28495	0	1.75585	0.130372	2.67023	0.061335	1.55523	0	2.60284	2.77035	0.719913	1.79894	2.95667	3.52419	1.40071	0	0	1.64518	0	0.056836	2.05917	1.64338	0.767813	0.055706	2.74491
MSTRG.2180	PGSC0003DMT400000536	0.734652	4.9132	0.136308	2.50964	3.4634	3.31646	9.9738	18.743	27.2213	0.549477	0.561971	0.866646	2.60871	4.37863	9.61196	2.63361	1.83132	3.34381	0.412736	0.269278	0.290385	5.93996	3.5767	1.31528	3.54228	1.88289	1.38543	0.821991	0.79652	0.913219	6.73493	2.59955	1.19929	9.5782	23.3359	16.8596
MSTRG.2181	PGSC0003DMT400000537	97.4676	124.615	184.694	61.9244	76.0931	62.5741	74.2856	107.925	85.7452	198.608	203.295	117.55	60.4834	67.9012	77.619	67.8476	59.984	65.5418	50.3803	235.76	208.815	65.9004	75.2013	66.6038	62.3529	84.1516	56.8289	102.644	92.4022	110.654	62.5482	67.5178	68.0868	91.2068	80.4823	103.361
MSTRG.2183	PGSC0003DMT400000186	79.7174	88.7448	30.8253	30.0367	24.0789	29.7469	19.5401	26.5561	23.2214	12.0646	13.3348	66.9549	46.4237	18.8957	35.623	28.9516	29.5627	42.7012	48.3134	12.4854	2.10235	43.3777	39.5605	34.7953	16.5692	65.8966	37.2616	59.0197	34.9838	29.7999	30.202	19.6088	40.1619	34.7747	20.7955	32.8784
MSTRG.2189	PGSC0003DMT400000539	8.63248	9.15345	11.0365	2.32996	1.54364	3.03661	2.18882	2.25202	2.06958	7.36508	7.45391	8.99519	2.67791	2.57375	2.30757	4.31202	2.35216	2.47386	10.8104	7.73059	8.82397	3.09161	2.74802	2.95397	3.04641	2.4975	2.7774	9.72946	13.7694	10.9207	3.0989	2.19255	3.59062	2.07453	2.92015	2.33652
MSTRG.2186	PGSC0003DMT400000194	1.3662	3.86917	16.3081	10.9231	9.15432	11.7868	16.193	27.5806	24.3891	14.3898	18.9879	3.40241	5.58274	6.96451	6.48324	5.69562	2.48674	3.90746	5.69737	12.4926	10.0723	6.01533	10.8732	8.30425	3.09655	14.6609	2.19104	1.45204	2.05625	1.28743	9.50506	8.14794	8.08733	19.2046	14.8041	29.8452
MSTRG.2185	PGSC0003DMT400000192	10.9869	10.8284	33.9158	24.4998	35.8844	35.4437	34.2438	85.5675	70.9582	42.8214	41.0934	9.51801	14.4962	22.3246	35.6627	19.1204	16.1032	15.3701	11.7107	43.2582	41.0399	21.5679	30.8535	25.8732	18.6698	34.6985	18.8299	8.98222	9.8318	10.7434	27.5991	25.2464	30.7097	53.7136	57.1182	82.4933
MSTRG.2187	PGSC0003DMT400000538	2.77587	0.680665	6.84187	35.7022	25.0234	19.6362	0.503085	6.94272	12.0659	1.33312	4.74155	4.7911	17.1256	13.7469	11.0995	44.9703	54.6554	33.435	12.2143	2.44602	2.31342	3.02732	7.40879	1.28375	27.2469	1.41772	55.0864	2.66851	0.860712	1.41675	9.2311	10.8163	8.56725	32.798	13.9744	12.7097
MSTRG.2184	PGSC0003DMT400000189	37.1233	48.4809	41.47	17.3168	40.7658	40.5684	30.1222	44.4735	61.3959	47.4952	65.5326	92.3624	38.3322	13.4988	34.233	24.0897	23.417	21.2247	17.2921	61.9277	77.1701	18.7653	21.4988	17.3007	24.1566	67.9977	27.6502	25.2019	42.4859	81.167	21.4155	18.5411	28.2188	40.5028	36.5332	75.3315
MSTRG.2190	PGSC0003DMT400000543	7.73177	0.951841	6.71754	9.57773	0	6.14596	4.88521	0	0	7.71911	6.41709	6.038	7.48856	0	0	0	0	8.80981	7.92132	0	0	0	0	9.73825	9.7983	6.72632	12.8703	0	8.77969	0	0	0	0	0	0	0
MSTRG.2193	PGSC0003DMT400000210	0.709022	1.62622	8.0344	0.891034	1.22207	1.27248	0.661423	1.5882	0.403106	6.09378	4.52522	1.88699	0.670006	0.786731	1.54502	1.6327	0.705464	0.412789	0.552589	8.28354	6.0163	0.698748	0.978718	1.60221	0.270396	3.30442	1.21957	1.11598	2.70879	0.524522	1.09702	0.693264	1.87636	1.06834	0.945368	1.2614
MSTRG.2194	PGSC0003DMT400000546	122.24	125.841	50.8596	52.4313	46.0186	40.5746	38.6202	31.1253	36.5633	54.6972	93.8697	103.156	54.8166	51.6652	31.9095	59.8847	49.0934	38.1076	54.6951	24.8127	19.0617	33.3162	40.4304	32.7254	31.2205	32.4229	37.7748	96.4437	49.4539	72.6	44.5894	36.3369	54.7401	41.3529	28.804	29.62
MSTRG.2195	PGSC0003DMT400000547	62.4885	51.5452	34.9925	35.9618	32.517	33.2982	29.2435	22.9475	32.34	40.4975	31.9135	63.2931	45.595	35.3587	36.5462	48.328	28.9724	49.476	29.2034	14.0111	26.8811	37.0192	22.6946	37.6333	27.1505	51.144	39.9667	61.7293	38.9895	18.661	35.7945	28.7362	33.101	20.0028	21.6417	35.9858
MSTRG.2198	PGSC0003DMT400000552	1.32142	1.6551	1.10816	0.87769	1.11409	1.11402	1.22073	1.32393	1.61901	1.4087	1.01486	1.2302	1.54467	1.1265	0.969472	1.25851	1.3973	1.39885	1.83563	0.930273	1.1507	1.4183	1.35419	0.651947	1.48984	2.13861	1.3384	1.26614	1.37174	1.46966	0.783656	1.29237	1.25682	1.28932	0.93597	1.36612
MSTRG.2200	PGSC0003DMT400000553	0.309009	1.20579	1.09969	3.48624	6.58602	8.70147	8.43644	84.5213	53.4698	1.83717	5.63266	2.65073	2.68644	5.72129	18.9678	1.87101	0.983868	1.70279	0.161632	6.27484	5.29534	7.09116	30.6491	15.4583	3.31027	37.3073	1.36069	0.434609	0	3.02801	6.45845	4.39431	6.92645	35.677	49.9398	83.1134
MSTRG.2199	PGSC0003DMT400000212	14.3737	13.7205	8.61821	47.3613	56.5756	69.4926	78.0622	92.8034	78.0782	4.9103	6.49752	11.8936	84.0453	76.2636	92.5415	59.536	43.4919	56.2763	17.369	4.78418	2.81399	76.8558	73.1614	92.2113	49.6025	90.6671	42.3451	13.7578	12.0504	14.2609	69.6095	55.4269	96.5235	68.5682	100.823	82.1388
MSTRG.2202	PGSC0003DMT400000215	0.70133	0.641528	0	1.7919	1.18606	1.09959	1.67999	3.47815	1.78934	1.90078	4.68963	0	5.62379	2.63175	7.94451	1.97785	1.06477	1.96115	0.140733	8.3903	9.21545	2.67599	3.32331	2.41739	2.17697	6.65156	1.14596	0.735847	0.110349	0.35385	1.62136	1.05493	1.63338	0.698434	0.900302	1.06441
MSTRG.2201	PGSC0003DMT400000554	0	0.186609	0	0	0.366561	0.110048	0.394564	0.295431	2.35652	1.74356	0.556455	0.20867	0.335883	0.197694	0.384277	0.645147	1.44176	0.740595	1.0118	0.33182	0.480409	0.232791	0.248999	0.160861	0.161037	1.95143	0.824495	0	0.461115	0	1.7239	0.204766	0	0.49114	0	0.290253
MSTRG.2203	PGSC0003DMT400000557	3.42999	4.14377	6.28592	4.23492	4.08434	3.77189	1.95815	4.20327	3.36748	7.46799	7.9923	4.63545	2.20294	2.4058	2.84034	2.03981	1.37167	2.39407	3.9321	6.22937	6.25613	2.62908	2.71826	3.55057	1.6646	3.60964	2.46685	3.05775	2.72474	1.75801	3.1871	4.67212	2.90043	3.09251	2.8362	3.97322
MSTRG.2197	PGSC0003DMT400000548	354.179	308.566	362.074	364.017	355.787	376.055	467.237	431.695	445.619	326.477	331.276	329.284	433.454	418.901	444.411	444.961	475.192	624.087	389.233	416.912	422.014	415.933	379.824	318.022	401.401	466.38	376.195	294.963	309.942	484.455	354.611	362.622	482.967	350.426	469.757	383.915
MSTRG.2205	PGSC0003DMT400000218	48.8857	30.9794	33.3492	41.5853	37.8555	40.3832	36.7835	36.3839	33.8226	36.2698	14.6726	35.6415	29.6481	11.6498	17.5018	8.74313	41.0731	41.1143	41.2258	15.384	20.1895	32.019	52.7183	26.3616	41.8435	53.3883	34.6181	42.1737	32.1863	33.3673	26.6016	53.9785	41.39	33.5263	49.5332	30.8636
MSTRG.2206	PGSC0003DMT400000558	1.27388	1.97885	1.22245	2.73099	2.19162	1.40313	2.72942	3.01857	3.49042	2.38618	1.9794	2.3684	1.45624	3.48086	2.30307	2.88587	2.40474	2.66929	2.07262	3.22577	2.09116	2.0872	2.64582	1.77049	2.5129	3.27342	2.40655	1.66582	1.71228	2.33375	2.12326	2.0177	1.87598	1.59451	3.4122	2.41902
MSTRG.2209	PGSC0003DMT400000226	0.618369	0.608714	0.880999	0.780233	0.355867	0.959671	1.86971	1.53676	0.467706	2.83814	2.25435	0.605046	0	0.584685	0.054377	2.54902	2.90652	1.52285	1.10781	1.69011	1.84343	0.497499	0.390121	0.797016	2.79098	0.361299	4.47337	0.674273	0.658141	0.832578	0.080266	0.757679	1.16439	2.59213	1.27706	0.732807
MSTRG.2208	PGSC0003DMT400000225	0.747268	1.12692	1.82864	1.22432	1.45338	1.9477	0.564296	0.963343	2.10664	2.45657	1.81082	1.39867	0.910786	1.07044	1.1154	0.759404	0.241972	0.795531	1.08274	1.70786	1.01704	0.981218	0.970846	2.16132	0.71381	1.14395	1.28011	1.8451	2.01529	1.06251	1.33498	2.04699	1.68379	1.05982	1.4297	2.25025
MSTRG.2210	PGSC0003DMT400000227	3.31467	2.456	9.18324	3.79149	1.83779	3.33765	2.02889	1.32903	0.744961	14.0442	11.6072	2.65011	0.432335	1.64383	0.880267	1.48013	1.4494	1.86053	4.76703	12.9534	17.1427	1.01467	0.91671	1.19797	2.22198	1.07193	2.56996	2.37433	3.49017	3.9893	0.944226	2.55849	1.78481	0.589182	1.21868	1.76106
MSTRG.2207	PGSC0003DMT400000220	82.2276	78.0246	1387	0.5928	0.354653	2.72847	0.095334	0	0.967835	2779.33	2034.81	104.721	2.38362	2.28796	3.41565	0.192754	0.03679	0.39825	58.6226	2608.1	2718.66	2.32895	5.25955	2.18276	0.803768	2.10962	0.399322	73.6538	69.6953	88.9555	1.98264	0.520146	1.47331	2.07643	0.488446	1.52468
MSTRG.2207	PGSC0003DMT400000222	349.081	354.7	1152.34	230.982	238.415	213.165	363.55	288.955	315.086	1475.86	1384.62	348.933	203.21	319.701	243.936	250.687	218.79	205.537	102.621	1824.4	1973.09	242.849	252.815	285.777	185.718	195.043	198.506	298.42	293.656	430.387	213.596	291.942	232.638	237.11	283.078	268.451
MSTRG.2212	PGSC0003DMT400000565	0	0	0	0	0.726446	17.6561	16.3291	0.542408	0.562071	0.771714	4.49275	15.1825	0	0.473214	0.210039	0	9.37124	0.637674	14.3397	42.4815	45.0681	9.9251	9.18875	2.16285	0	1.67617	0	0	0	12.2193	0	0.181601	16.9166	15.2612	0.219201	5.47224
MSTRG.2211	PGSC0003DMT400000230	80.14	81.2858	158.855	94.7016	97.9952	105.654	119.447	111.948	121.5	187.066	199.008	92.5307	115.156	116.926	125.274	93.3992	109.832	107.618	103.118	173.367	156.902	127.833	115.399	130.002	99.4224	127.312	110.036	80.4105	97.3358	85.6666	107.849	103.966	119.796	104.618	118.84	99.3384
MSTRG.2214	PGSC0003DMT400000568	15.4251	10.558	13.0216	4.68115	5.06074	6.21544	6.19011	4.66863	9.41837	0	9.27392	9.50407	3.75083	9.39015	8.0292	0	3.94819	9.69886	8.78523	6.08285	7.11697	3.76268	8.74102	7.04587	4.37168	13.039	7.17814	9.94502	11.1249	5.09252	7.54841	7.67529	8.1661	6.02128	7.28054	9.3981
MSTRG.2215	PGSC0003DMT400000570	16.1051	7.02984	7.04969	2.38677	1.37177	1.84132	0.895709	3.45816	1.97933	3.56798	8.00975	13.9727	4.78481	1.9913	3.85106	6.23507	3.40875	4.50669	4.05398	3.20312	3.3932	3.80303	4.1564	1.53293	1.63954	6.26712	2.11047	7.08076	4.55067	7.37861	1.85887	0.813564	1.2118	4.86413	1.62626	1.69541
MSTRG.2216	PGSC0003DMT400000235	26.7567	24.5309	20.9628	15.3605	14.8519	13.9167	15.4299	10.0832	14.0257	11.4811	15.2228	25.8851	16.4048	13.9294	13.9193	20.909	19.055	19.5551	41.7198	14.2998	14.9784	15.0649	15.9349	10.293	18.1941	18.1723	16.5737	21.7783	27.6741	27.2618	17.4372	13.9274	16.3084	11.9853	13.4364	13.6189
MSTRG.2219	PGSC0003DMT400000241	2.80999	2.18952	10.1335	9.27608	7.13699	7.16852	6.2647	6.54115	7.26582	13.432	11.426	0.973581	4.26238	6.79156	5.11657	4.99771	3.91145	4.18593	3.13816	9.07808	10.193	5.46813	7.1673	7.58176	2.61674	4.79084	5.36622	1.86744	1.57612	2.19996	8.10901	9.63668	5.91591	5.43534	7.8632	7.81557
MSTRG.2217	PGSC0003DMT400000237	0.508067	0	0	0.288124	0	0	0.207547	0	0	0	7.34819	0.15506	0	0	0	0.13732	0	0	0	0	0	0	0.159527	0	0.126368	0	0	0.104064	0	0	0	0.073229	0	0.055051	0.605316	0.604041
MSTRG.2218	PGSC0003DMT400000240	10.5924	10.595	7.89739	8.37557	8.95028	9.75155	10.8316	8.19149	9.32258	5.55464	7.9838	11.422	7.35875	10.4262	11.7809	13.2073	10.5746	14.5801	9.37616	7.23907	8.25507	11.3304	14.121	9.06339	12.1805	11.4714	12.7638	10.1085	10.1958	12.4856	13.5817	9.22067	10.7069	13.0399	10.5921	10.9643
MSTRG.2220	PGSC0003DMT400000243	0	0	0	0	0	6.60294	0	0	0.442482	0	0	0	0	5.82702	0.094181	0	0	0	0	0	3.80267	1.00799	0	0	0.2422	0.115419	0	8.1966	10.9843	0	0.020039	0	6.43528	0	0	1.88787
MSTRG.2222	PGSC0003DMT400000571	0.845802	0.207888	0	2.83306	1.35817	1.22599	2.07602	1.79568	0.584266	0	0	0	1.19739	2.8948	1.22456	1.18307	1.13468	1.19693	0.009942	0	0.090153	0.623336	1.19911	1.362	1.66836	0.716823	1.24545	0	0	0	1.88157	1.0837	0.867835	1.50913	1.78336	1.54677
MSTRG.2223	PGSC0003DMT400000249	2.5292	2.4117	5.13988	5.29283	4.80394	2.86111	4.38263	5.24735	2.97302	6.37937	7.13654	0.953276	5.04888	4.42715	4.72298	3.63131	4.64216	2.83153	1.93549	6.56116	7.0288	3.93101	2.1144	3.53468	3.56986	4.66816	5.44686	2.70728	1.2587	1.91911	2.82665	2.90798	2.66977	2.92387	4.19962	3.63558
MSTRG.2224	PGSC0003DMT400000251	11.6562	9.14704	8.75628	9.12996	2.24683	14.5035	16.409	1.76706	3.04377	8.27776	3.62194	25.9892	5.23058	1.71125	7.46113	2.05972	9.3589	8.8357	2.03853	24.103	15.537	6.38621	1.68474	18.2555	10.8458	1.85066	8.1021	6.52762	25.332	6.97229	4.09086	13.997	1.12583	5.90722	14.9876	9.56488
MSTRG.2225	PGSC0003DMT400000574	0	0	0	0	0	0	0.011315	0	0	0	0	0	0	0	1.95036	0	0	0	0	0	0.183176	0	0	0	0	0	0	10.9652	0	0	0	0.025046	0	0	0	0
MSTRG.2225	PGSC0003DMT400000575	0.630368	0.935	0.726225	0	1.73946	0	0.525622	0	0.282919	0	0	1.27888	0	0.487289	0.344976	0.705793	0.127491	0	0	0.755573	0.656567	1.39931	0	1.3174	2.00641	0.537437	0	0	0.464655	0	0	0.756515	0	1.33475	0.129092	0.361534
MSTRG.2225	PGSC0003DMT400000572	0.579018	0.269564	0.357352	0	0	3.93797	0.352302	0	0.144368	1.17558	0.316984	1.19901	0.530328	0.188845	0	0.929383	0.433508	0.809065	0.497603	0	0	0.113918	0.199506	2.11937	0.009906	0	1.66394	0.56205	0.195526	0	0.739431	0.488097	0.24297	0.382155	0	0.146137
MSTRG.2227	PGSC0003DMT400000254	0	0.700342	0	8.6915	8.40009	10.9612	9.7857	0	11.3745	8.28307	9.34269	0	0	0	0	11.1212	8.45053	0	0	0	0	9.74838	4.90516	0	1.50575	13.4551	0.459297	0.495894	0	8.51288	0.50312	0	1.31258	10.2454	0	0
MSTRG.2227	PGSC0003DMT400000259	24.7047	21.3257	7.71448	9.76774	9.46008	7.8448	0	0	8.84483	5.51571	4.63701	19.8171	0	7.89851	6.3615	9.83071	6.55749	7.80931	0	0	4.36333	6.04576	5.15551	8.25476	5.22572	6.65014	0	19.0698	15.5296	4.67718	8.78715	3.87206	2.04402	8.62172	0	0
MSTRG.2226	PGSC0003DMT400000256	13.3312	9.55526	5.71207	6.93049	6.093	7.5917	5.83408	3.95233	4.08716	5.04914	3.86696	10.5089	7.56951	6.93456	5.95374	6.99909	9.16413	5.98834	14.0872	5.41449	5.53445	6.08709	4.31229	8.77669	9.05874	6.53159	8.71737	15.5292	14.2971	11.7314	5.09217	7.82995	6.04284	5.1628	6.35246	5.48761
MSTRG.2228	PGSC0003DMT400000261	36.7347	24.5444	2.61759	73.7409	3.58344	76.3079	2.45879	40.6292	6.45937	101.38	105.953	0	3.92012	3.1417	74.8515	3.28187	38.1163	62.1784	33.6246	94.7555	100.149	62.2478	77.8295	3.88702	56.2211	71.293	27.0024	31.0194	0.966527	23.2037	2.79871	3.75598	4.83418	4.25709	86.4321	89.2334
MSTRG.2230	PGSC0003DMT400000587	16.5642	17.2024	11.143	6.96227	5.04983	7.69146	6.78475	8.50385	9.54377	16.891	4.97159	11.3502	1.98118	3.85453	2.08055	5.57866	30.4434	2.997	13.1242	8.59206	11.5665	3.79487	9.17194	3.34716	5.82975	6.40615	4.41208	30.9929	27.1568	11.8618	8.00551	5.41028	6.79671	8.79054	5.47803	5.01577
MSTRG.2231	PGSC0003DMT400000589	119.055	119.639	138.454	119.838	115.077	118.494	37.5393	43.7304	54.5934	59.4412	54.8977	138.045	158.477	142.656	116.3	161.284	114.106	113.306	228.718	75.0932	80.7887	130.233	116.139	97.8365	121.67	115.164	106.885	161.331	219.532	212.374	110.816	88.7122	139.439	95.6506	66.0299	69.868
[truncated: 51,988 more rows]
