# Supplementary material for: Genome-Wide Identification and Characterization of Potato Long Non-coding RNAs Associated With Phytophthora infestans Resistance
Source: Front Plant Sci. 2021 Feb 10;12:619062. doi: 10.3389/fpls.2021.619062 (PMC7902931; doi:10.3389/fpls.2021.619062)
Supplement: Supplementary Table 6 — Identification of lncRNAs. [file Table_6.XLSX]

## Sheet: Table S6
lncRNA_transcript	LncRNA_name	partnerRNA_gene	partnerRNA_transcript	direction	type	distance	subtype	location
MSTRG.10009.1	StLNC0001	PGSC0003DMG400027734	PGSC0003DMT400071312	antisense	intergenic	795	convergent	downstream
MSTRG.11029.1	StLNC0002	PGSC0003DMG400044220	PGSC0003DMT400094649	antisense	intergenic	8778	convergent	downstream
MSTRG.11107.4	StLNC0003	PGSC0003DMG400043197	PGSC0003DMT400093626	sense	intergenic	864	same_strand	downstream
MSTRG.11254.9	StLNC0004	PGSC0003DMG400000776	PGSC0003DMT400002035	antisense	genic	0	overlapping	exonic
MSTRG.12147.8	StLNC0005	PGSC0003DMG400009893	PGSC0003DMT400025613	sense	intergenic	465	same_strand	upstream
MSTRG.12209.3	StLNC0006	PGSC0003DMG402009997	PGSC0003DMT400025891	antisense	intergenic	138	divergent	upstream
MSTRG.14784.2	StLNC0007	PGSC0003DMG400038056	PGSC0003DMT400088485	sense	genic	0	containing	intronic
MSTRG.14786.2	StLNC0008	PGSC0003DMG400016943	PGSC0003DMT400043636	sense	intergenic	15876	same_strand	downstream
MSTRG.1790.3	StLNC0009	PGSC0003DMG400031109	PGSC0003DMT400079876	sense	intergenic	10032	same_strand	upstream
MSTRG.3821.1	StLNC0010	PGSC0003DMG400014526	PGSC0003DMT400037661	sense	intergenic	15653	same_strand	upstream
MSTRG.3920.1	StLNC0011	PGSC0003DMG400039811	PGSC0003DMT400090240	antisense	intergenic	7108	divergent	upstream
MSTRG.27019.26	StLNC0012	PGSC0003DMG400019686	PGSC0003DMT400050687	sense	genic	0	containing	intronic
MSTRG.8297.1	StLNC0013	PGSC0003DMG400004547	PGSC0003DMT400011562	antisense	genic	0	overlapping	exonic
MSTRG.8010.1	StLNC0014	PGSC0003DMG400003211	PGSC0003DMT400008336	antisense	intergenic	7871	divergent	upstream
MSTRG.9083.2	StLNC0015	PGSC0003DMG400005741	PGSC0003DMT400014727	antisense	intergenic	7857	divergent	upstream
MSTRG.3483.19	StLNC0016	PGSC0003DMG400025186	PGSC0003DMT400064863	antisense	intergenic	282	convergent	downstream
MSTRG.13956.1	StLNC0017	PGSC0003DMG400013084	PGSC0003DMT400034043	antisense	genic	0	overlapping	exonic
MSTRG.11168.1	StLNC0018	PGSC0003DMG400024863	PGSC0003DMT400063966	sense	intergenic	2549	same_strand	upstream
MSTRG.23880.4	StLNC0019	PGSC0003DMG400036134	PGSC0003DMT400086563	antisense	intergenic	17540	convergent	downstream
MSTRG.21938.1	StLNC0020	PGSC0003DMG400036091	PGSC0003DMT400086520	antisense	intergenic	20965	divergent	upstream
MSTRG.7267.1	StLNC0021	PGSC0003DMG400026810	PGSC0003DMT400068928	antisense	intergenic	3981	convergent	downstream
MSTRG.1395.1	StLNC0022	PGSC0003DMG400045121	PGSC0003DMT400095550	antisense	genic	0	overlapping	exonic
MSTRG.23245.20	StLNC0023	PGSC0003DMG400021603	PGSC0003DMT400055632	antisense	genic	0	nested	exonic
MSTRG.24631.1	StLNC0024	PGSC0003DMG400017119	PGSC0003DMT400044114	sense	intergenic	8710	same_strand	upstream
MSTRG.580.1	StLNC0025	PGSC0003DMG400036853	PGSC0003DMT400087282	antisense	intergenic	20219	convergent	downstream
MSTRG.243.4	StLNC0026	PGSC0003DMG400021323	PGSC0003DMT400054945	sense	intergenic	556	same_strand	upstream
MSTRG.21241.2	StLNC0027	PGSC0003DMG402008909	PGSC0003DMT400023016	antisense	genic	0	containing	exonic
MSTRG.3027.1	StLNC0028	PGSC0003DMG400045410	PGSC0003DMT400095839	antisense	genic	0	containing	intronic
MSTRG.10592.1	StLNC0029	PGSC0003DMG400009777	PGSC0003DMT400025330	sense	intergenic	16303	same_strand	downstream
MSTRG.19610.5	StLNC0030	PGSC0003DMG400043527	PGSC0003DMT400093956	sense	intergenic	9935	same_strand	upstream
MSTRG.27812.1	StLNC0031	PGSC0003DMG400030302	PGSC0003DMT400077905	antisense	intergenic	5061	divergent	upstream
MSTRG.28512.3	StLNC0032	PGSC0003DMG400012779	PGSC0003DMT400033271	sense	intergenic	36581	same_strand	downstream
MSTRG.4547.1	StLNC0033	PGSC0003DMG400009432	PGSC0003DMT400024402	antisense	intergenic	1978	divergent	upstream
MSTRG.10821.1	StLNC0034	PGSC0003DMG400009620	PGSC0003DMT400024886	sense	intergenic	10426	same_strand	upstream
MSTRG.3483.10	StLNC0035	PGSC0003DMG400025186	PGSC0003DMT400064863	antisense	intergenic	286	convergent	downstream
MSTRG.23290.1	StLNC0036	PGSC0003DMG402011252	PGSC0003DMT400029266	antisense	intergenic	12481	convergent	downstream
MSTRG.23154.2	StLNC0037	PGSC0003DMG400031535	PGSC0003DMT400080961	antisense	intergenic	4377	divergent	upstream
MSTRG.337.2	StLNC0038	PGSC0003DMG400010705	PGSC0003DMT400027810	sense	intergenic	278	same_strand	upstream
MSTRG.21618.1	StLNC0039	PGSC0003DMG400035555	PGSC0003DMT400085984	antisense	intergenic	5030	convergent	downstream
MSTRG.28744.3	StLNC0040	PGSC0003DMG400028859	PGSC0003DMT400074265	antisense	genic	0	containing	intronic
MSTRG.23273.1	StLNC0041	PGSC0003DMG402011260	PGSC0003DMT400029309	antisense	intergenic	3057	divergent	upstream
MSTRG.17515.1	StLNC0042	PGSC0003DMG400016074	PGSC0003DMT400041473	antisense	intergenic	55959	divergent	upstream
MSTRG.21844.2	StLNC0043	PGSC0003DMG400030270	PGSC0003DMT400077817	antisense	intergenic	13339	convergent	downstream
MSTRG.13333.2	StLNC0044	PGSC0003DMG400037101	PGSC0003DMT400087530	sense	intergenic	3838	same_strand	upstream
MSTRG.14638.3	StLNC0045	PGSC0003DMG400045703	PGSC0003DMT400096132	antisense	intergenic	75151	convergent	downstream
MSTRG.28818.1	StLNC0046	PGSC0003DMG400004262	PGSC0003DMT400010890	antisense	genic	0	overlapping	exonic
MSTRG.745.1	StLNC0047	PGSC0003DMG400020858	PGSC0003DMT400053766	sense	intergenic	15153	same_strand	upstream
MSTRG.17525.3	StLNC0048	PGSC0003DMG400019106	PGSC0003DMT400049159	sense	intergenic	10114	same_strand	downstream
MSTRG.11254.11	StLNC0049	PGSC0003DMG400000776	PGSC0003DMT400002035	antisense	genic	0	nested	exonic
MSTRG.16812.1	StLNC0050	PGSC0003DMG400003201	PGSC0003DMT400008312	antisense	intergenic	3329	convergent	downstream
MSTRG.1244.1	StLNC0051	PGSC0003DMG400035459	PGSC0003DMT400085888	sense	intergenic	33527	same_strand	downstream
MSTRG.28320.7	StLNC0052	PGSC0003DMG400002364	PGSC0003DMT400006086	antisense	genic	0	nested	exonic
MSTRG.18808.1	StLNC0053	PGSC0003DMG400022254	PGSC0003DMT400057303	antisense	genic	0	nested	intronic
MSTRG.8491.5	StLNC0054	PGSC0003DMG400018110	PGSC0003DMT400046637	sense	intergenic	5272	same_strand	downstream
MSTRG.6384.1	StLNC0055	PGSC0003DMG400000496	PGSC0003DMT400001303	antisense	genic	0	nested	exonic
MSTRG.17258.27	StLNC0056	PGSC0003DMG400009565	PGSC0003DMT400024747	sense	genic	0	containing	intronic
MSTRG.23863.3	StLNC0057	PGSC0003DMG400043035	PGSC0003DMT400093464	antisense	genic	0	containing	intronic
MSTRG.20402.3	StLNC0058	PGSC0003DMG400002399	PGSC0003DMT400006170	antisense	intergenic	2791	divergent	upstream
MSTRG.923.2	StLNC0059	PGSC0003DMG400015973	PGSC0003DMT400041261	sense	genic	0	containing	intronic
MSTRG.10694.4	StLNC0060	PGSC0003DMG400031498	PGSC0003DMT400080879	antisense	intergenic	9602	divergent	upstream
MSTRG.22113.1	StLNC0061	PGSC0003DMG400030225	PGSC0003DMT400077689	antisense	genic	0	containing	intronic
MSTRG.10769.1	StLNC0062	PGSC0003DMG400004509	PGSC0003DMT400011484	sense	intergenic	3858	same_strand	upstream
MSTRG.19589.4	StLNC0063	PGSC0003DMG400013040	PGSC0003DMT400033934	sense	intergenic	8379	same_strand	downstream
MSTRG.24115.1	StLNC0064	PGSC0003DMG400012041	PGSC0003DMT400031411	antisense	intergenic	7909	divergent	upstream
MSTRG.6782.1	StLNC0065	PGSC0003DMG400042214	PGSC0003DMT400092643	sense	genic	0	containing	intronic
MSTRG.21887.2	StLNC0066	PGSC0003DMG400006638	PGSC0003DMT400016991	sense	genic	0	overlapping	intronic
MSTRG.99.1	StLNC0067	PGSC0003DMG400032217	PGSC0003DMT400082038	antisense	genic	0	containing	intronic
MSTRG.8423.1	StLNC0068	PGSC0003DMG402015159	PGSC0003DMT400039207	sense	intergenic	3769	same_strand	upstream
MSTRG.23820.1	StLNC0069	PGSC0003DMG400012839	PGSC0003DMT400033417	sense	genic	0	containing	intronic
MSTRG.23939.1	StLNC0070	PGSC0003DMG400039878	PGSC0003DMT400090307	antisense	intergenic	40179	convergent	downstream
MSTRG.4615.1	StLNC0071	PGSC0003DMG400010362	PGSC0003DMT400026850	antisense	genic	0	nested	exonic
MSTRG.3929.1	StLNC0072	PGSC0003DMG400009805	PGSC0003DMT400025396	antisense	genic	0	overlapping	exonic
MSTRG.27144.1	StLNC0073	PGSC0003DMG400002982	PGSC0003DMT400007719	sense	intergenic	986	same_strand	downstream
MSTRG.28296.32	StLNC0074	PGSC0003DMG400021934	PGSC0003DMT400056456	sense	intergenic	89991	same_strand	downstream
MSTRG.28296.36	StLNC0075	PGSC0003DMG400014999	PGSC0003DMT400038813	antisense	intergenic	76649	convergent	downstream
MSTRG.26319.1	StLNC0076	PGSC0003DMG400008416	PGSC0003DMT400021696	sense	intergenic	364	same_strand	downstream
MSTRG.28296.10	StLNC0077	PGSC0003DMG400021934	PGSC0003DMT400056456	sense	intergenic	30822	same_strand	downstream
MSTRG.6856.2	StLNC0078	PGSC0003DMG400022537	PGSC0003DMT400058049	sense	intergenic	9811	same_strand	upstream
MSTRG.27390.4	StLNC0079	PGSC0003DMG400015308	PGSC0003DMT400039562	antisense	genic	0	containing	intronic
MSTRG.12441.1	StLNC0080	PGSC0003DMG400025109	PGSC0003DMT400064623	sense	intergenic	18319	same_strand	downstream
MSTRG.17914.1	StLNC0081	PGSC0003DMG400006131	PGSC0003DMT400015693	sense	intergenic	6612	same_strand	downstream
MSTRG.9170.2	StLNC0082	PGSC0003DMG401005707	PGSC0003DMT400014587	sense	intergenic	3232	same_strand	downstream
MSTRG.11184.4	StLNC0083	PGSC0003DMG400024834	PGSC0003DMT400063893	sense	genic	0	containing	intronic
MSTRG.7273.3	StLNC0084	PGSC0003DMG400037875	PGSC0003DMT400088304	sense	intergenic	5121	same_strand	upstream
MSTRG.10466.4	StLNC0085	PGSC0003DMG400025586	PGSC0003DMT400065742	sense	intergenic	18041	same_strand	downstream
MSTRG.28476.1	StLNC0086	PGSC0003DMG400000655	PGSC0003DMT400001750	sense	intergenic	2444	same_strand	upstream
MSTRG.1855.1	StLNC0087	PGSC0003DMG400001676	PGSC0003DMT400004212	sense	intergenic	31409	same_strand	upstream
MSTRG.28966.2	StLNC0088	PGSC0003DMG400042845	PGSC0003DMT400093274	sense	intergenic	12902	same_strand	downstream
MSTRG.1215.2	StLNC0089	PGSC0003DMG400011334	PGSC0003DMT400029476	antisense	intergenic	1693	divergent	upstream
MSTRG.24297.1	StLNC0090	PGSC0003DMG401004423	PGSC0003DMT400011301	antisense	genic	0	overlapping	exonic
MSTRG.10696.2	StLNC0091	PGSC0003DMG400047157	PGSC0003DMT400097586	antisense	genic	0	containing	intronic
MSTRG.19415.5	StLNC0092	PGSC0003DMG400039179	PGSC0003DMT400089608	antisense	intergenic	7700	divergent	upstream
MSTRG.13209.1	StLNC0093	PGSC0003DMG400002359	PGSC0003DMT400006075	antisense	intergenic	418	convergent	downstream
MSTRG.19006.2	StLNC0094	PGSC0003DMG400014104	PGSC0003DMT400036586	antisense	genic	0	overlapping	exonic
MSTRG.3911.1	StLNC0095	PGSC0003DMG400003171	PGSC0003DMT400008217	antisense	intergenic	2212	divergent	upstream
MSTRG.28964.12	StLNC0096	PGSC0003DMG400042845	PGSC0003DMT400093274	sense	genic	0	overlapping	intronic
MSTRG.19069.1	StLNC0097	PGSC0003DMG400009530	PGSC0003DMT400024632	antisense	genic	0	overlapping	exonic
MSTRG.28296.39	StLNC0098	PGSC0003DMG400021934	PGSC0003DMT400056456	sense	intergenic	93560	same_strand	downstream
MSTRG.18471.1	StLNC0099	PGSC0003DMG400007074	PGSC0003DMT400018219	antisense	genic	0	nested	exonic
MSTRG.12838.1	StLNC0100	PGSC0003DMG400046081	PGSC0003DMT400096510	sense	genic	0	containing	intronic
MSTRG.947.3	StLNC0101	PGSC0003DMG400037465	PGSC0003DMT400087894	antisense	intergenic	31213	divergent	upstream
MSTRG.3964.16	StLNC0102	PGSC0003DMG400042413	PGSC0003DMT400092842	antisense	intergenic	16566	convergent	downstream
MSTRG.24119.4	StLNC0103	PGSC0003DMG400017801	PGSC0003DMT400045890	antisense	genic	0	overlapping	exonic
MSTRG.15234.1	StLNC0104	PGSC0003DMG400011820	PGSC0003DMT400030854	antisense	genic	0	overlapping	exonic
MSTRG.482.2	StLNC0105	PGSC0003DMG400011700	PGSC0003DMT400030549	antisense	intergenic	4995	convergent	downstream
MSTRG.27678.5	StLNC0106	PGSC0003DMG400000344	PGSC0003DMT400000917	antisense	intergenic	1516	convergent	downstream
MSTRG.11091.6	StLNC0107	PGSC0003DMG400019688	PGSC0003DMT400050689	sense	intergenic	2115	same_strand	upstream
MSTRG.22220.1	StLNC0108	PGSC0003DMG400018957	PGSC0003DMT400048779	antisense	intergenic	525	divergent	upstream
MSTRG.20592.1	StLNC0109	PGSC0003DMG400026268	PGSC0003DMT400067565	sense	intergenic	51392	same_strand	upstream
MSTRG.19975.2	StLNC0110	PGSC0003DMG400037004	PGSC0003DMT400087433	antisense	intergenic	2562	convergent	downstream
MSTRG.24178.1	StLNC0111	PGSC0003DMG402014048	PGSC0003DMT400036477	antisense	genic	0	nested	exonic
MSTRG.12365.3	StLNC0112	PGSC0003DMG400005586	PGSC0003DMT400014246	sense	intergenic	4403	same_strand	downstream
MSTRG.19007.1	StLNC0113	PGSC0003DMG400008749	PGSC0003DMT400022567	antisense	genic	0	overlapping	exonic
MSTRG.29232.1	StLNC0114	PGSC0003DMG400045101	PGSC0003DMT400095530	sense	intergenic	17052	same_strand	upstream
MSTRG.17258.28	StLNC0115	PGSC0003DMG400009565	PGSC0003DMT400024747	sense	genic	0	containing	intronic
MSTRG.10533.1	StLNC0116	PGSC0003DMG400026860	PGSC0003DMT400069046	antisense	intergenic	35194	divergent	upstream
MSTRG.28298.1	StLNC0117	PGSC0003DMG400014999	PGSC0003DMT400038813	antisense	intergenic	87668	convergent	downstream
MSTRG.9480.1	StLNC0118	PGSC0003DMG400009163	PGSC0003DMT400023685	antisense	intergenic	12511	convergent	downstream
MSTRG.17522.3	StLNC0119	PGSC0003DMG400019106	PGSC0003DMT400049159	sense	genic	0	containing	intronic
MSTRG.10651.2	StLNC0120	PGSC0003DMG400038483	PGSC0003DMT400088912	antisense	intergenic	16269	divergent	upstream
MSTRG.22713.1	StLNC0121	PGSC0003DMG400032270	PGSC0003DMT400082119	sense	intergenic	1069	same_strand	downstream
MSTRG.13748.1	StLNC0122	PGSC0003DMG404030108	PGSC0003DMT400077411	sense	intergenic	4919	same_strand	downstream
MSTRG.16569.3	StLNC0123	PGSC0003DMG402030469	PGSC0003DMT400078290	antisense	genic	0	overlapping	exonic
MSTRG.10650.1	StLNC0124	PGSC0003DMG400040811	PGSC0003DMT400091240	antisense	intergenic	12694	convergent	downstream
MSTRG.15278.1	StLNC0125	PGSC0003DMG402030775	PGSC0003DMT400079080	antisense	genic	0	overlapping	exonic
MSTRG.22173.9	StLNC0126	PGSC0003DMG400043953	PGSC0003DMT400094382	sense	genic	0	containing	intronic
MSTRG.27518.1	StLNC0127	PGSC0003DMG400038772	PGSC0003DMT400089201	antisense	intergenic	5501	divergent	upstream
MSTRG.4952.7	StLNC0128	PGSC0003DMG400010236	PGSC0003DMT400026515	antisense	genic	0	nested	exonic
MSTRG.18881.1	StLNC0129	PGSC0003DMG401022115	PGSC0003DMT400056858	sense	intergenic	2974	same_strand	upstream
MSTRG.21971.2	StLNC0130	PGSC0003DMG400045596	PGSC0003DMT400096025	antisense	intergenic	41681	divergent	upstream
MSTRG.3775.2	StLNC0131	PGSC0003DMG400042313	PGSC0003DMT400092742	sense	genic	0	containing	intronic
MSTRG.13432.1	StLNC0132	PGSC0003DMG400020760	PGSC0003DMT400053519	antisense	intergenic	19894	divergent	upstream
MSTRG.20029.2	StLNC0133	PGSC0003DMG400042760	PGSC0003DMT400093189	antisense	genic	0	containing	exonic
MSTRG.28168.6	StLNC0134	PGSC0003DMG400005293	PGSC0003DMT400013554	antisense	intergenic	1847	convergent	downstream
MSTRG.839.2	StLNC0135	PGSC0003DMG400021498	PGSC0003DMT400055372	sense	intergenic	21054	same_strand	upstream
MSTRG.28520.3	StLNC0136	PGSC0003DMG400034913	PGSC0003DMT400085342	antisense	intergenic	39002	divergent	upstream
MSTRG.17258.22	StLNC0137	PGSC0003DMG400009565	PGSC0003DMT400024747	sense	genic	0	containing	intronic
MSTRG.17258.25	StLNC0138	PGSC0003DMG400009565	PGSC0003DMT400024747	sense	genic	0	containing	intronic
MSTRG.80.29	StLNC0139	PGSC0003DMG400032127	PGSC0003DMT400081823	sense	intergenic	13897	same_strand	upstream
MSTRG.26517.1	StLNC0140	PGSC0003DMG400022869	PGSC0003DMT400058866	sense	intergenic	6085	same_strand	upstream
MSTRG.26611.7	StLNC0141	PGSC0003DMG400032502	PGSC0003DMT400082374	sense	intergenic	1047	same_strand	downstream
MSTRG.17336.1	StLNC0142	PGSC0003DMG400022092	PGSC0003DMT400056808	sense	intergenic	9466	same_strand	upstream
MSTRG.3883.1	StLNC0143	PGSC0003DMG400038498	PGSC0003DMT400088927	antisense	genic	0	overlapping	exonic
MSTRG.2522.6	StLNC0144	PGSC0003DMG402028565	PGSC0003DMT400073532	antisense	intergenic	3353	convergent	downstream
MSTRG.27644.1	StLNC0145	PGSC0003DMG400045494	PGSC0003DMT400095923	sense	genic	0	containing	intronic
MSTRG.28081.2	StLNC0146	PGSC0003DMG400002307	PGSC0003DMT400005944	antisense	intergenic	18721	convergent	downstream
MSTRG.28713.2	StLNC0147	PGSC0003DMG400044457	PGSC0003DMT400094886	antisense	intergenic	42857	convergent	downstream
MSTRG.5908.1	StLNC0148	PGSC0003DMG400021397	PGSC0003DMT400055136	antisense	intergenic	36	divergent	upstream
MSTRG.15505.1	StLNC0149	PGSC0003DMG400020466	PGSC0003DMT400052738	sense	genic	0	containing	intronic
MSTRG.29284.1	StLNC0150	PGSC0003DMG400004667	PGSC0003DMT400011891	antisense	intergenic	14135	convergent	downstream
MSTRG.7086.1	StLNC0151	PGSC0003DMG400038321	PGSC0003DMT400088750	sense	genic	0	containing	intronic
MSTRG.10484.3	StLNC0152	PGSC0003DMG400044440	PGSC0003DMT400094869	antisense	intergenic	52435	divergent	upstream
MSTRG.2975.1	StLNC0153	PGSC0003DMG400023798	PGSC0003DMT400061156	antisense	genic	0	overlapping	exonic
MSTRG.27146.17	StLNC0154	PGSC0003DMG401002977	PGSC0003DMT400007696	sense	intergenic	10118	same_strand	upstream
MSTRG.3721.2	StLNC0155	PGSC0003DMG402014659	PGSC0003DMT400038004	antisense	genic	0	overlapping	exonic
MSTRG.26524.1	StLNC0156	PGSC0003DMG400022871	PGSC0003DMT400058871	antisense	genic	0	containing	intronic
MSTRG.6105.2	StLNC0157	PGSC0003DMG400010069	PGSC0003DMT400026113	antisense	intergenic	491	convergent	downstream
MSTRG.23245.14	StLNC0158	PGSC0003DMG400021603	PGSC0003DMT400055632	antisense	genic	0	nested	exonic
MSTRG.3698.5	StLNC0159	PGSC0003DMG400018631	PGSC0003DMT400047936	antisense	genic	0	overlapping	exonic
MSTRG.21953.5	StLNC0160	PGSC0003DMG400028881	PGSC0003DMT400074299	sense	intergenic	296	same_strand	downstream
MSTRG.26517.2	StLNC0161	PGSC0003DMG400022869	PGSC0003DMT400058866	sense	intergenic	6109	same_strand	upstream
MSTRG.14547.1	StLNC0162	PGSC0003DMG400037676	PGSC0003DMT400088105	sense	intergenic	1377	same_strand	upstream
MSTRG.26529.2	StLNC0163	PGSC0003DMG400022861	PGSC0003DMT400058836	sense	intergenic	55256	same_strand	downstream
MSTRG.23936.3	StLNC0164	PGSC0003DMG400039878	PGSC0003DMT400090307	antisense	intergenic	23988	convergent	downstream
MSTRG.19004.13	StLNC0165	PGSC0003DMG400017091	PGSC0003DMT400044055	sense	genic	0	containing	intronic
MSTRG.28296.49	StLNC0166	PGSC0003DMG400014999	PGSC0003DMT400038813	antisense	intergenic	91806	convergent	downstream
MSTRG.29313.3	StLNC0167	PGSC0003DMG400004675	PGSC0003DMT400011908	antisense	genic	0	overlapping	exonic
MSTRG.73.1	StLNC0168	PGSC0003DMG400032169	PGSC0003DMT400081953	antisense	intergenic	6046	divergent	upstream
MSTRG.24119.2	StLNC0169	PGSC0003DMG400017801	PGSC0003DMT400045890	antisense	genic	0	overlapping	exonic
MSTRG.7750.3	StLNC0170	PGSC0003DMG400014329	PGSC0003DMT400037162	sense	intergenic	15869	same_strand	upstream
MSTRG.17320.2	StLNC0171	PGSC0003DMG400043285	PGSC0003DMT400093714	antisense	intergenic	34925	divergent	upstream
MSTRG.23245.3	StLNC0172	PGSC0003DMG400021603	PGSC0003DMT400055632	antisense	genic	0	nested	exonic
MSTRG.26415.2	StLNC0173	PGSC0003DMG400040570	PGSC0003DMT400090999	sense	intergenic	30394	same_strand	downstream
MSTRG.2930.1	StLNC0174	PGSC0003DMG400024913	PGSC0003DMT400064112	antisense	intergenic	770	convergent	downstream
MSTRG.24168.1	StLNC0175	PGSC0003DMG400024415	PGSC0003DMT400062737	antisense	intergenic	27610	convergent	downstream
MSTRG.351.2	StLNC0176	PGSC0003DMG400010502	PGSC0003DMT400027237	sense	genic	0	containing	intronic
MSTRG.14507.1	StLNC0177	PGSC0003DMG400009672	PGSC0003DMT400025043	antisense	intergenic	1392	convergent	downstream
MSTRG.17379.1	StLNC0178	PGSC0003DMG400045267	PGSC0003DMT400095696	antisense	intergenic	9781	convergent	downstream
MSTRG.150.1	StLNC0179	PGSC0003DMG400032195	PGSC0003DMT400081999	antisense	intergenic	365	convergent	downstream
MSTRG.2510.1	StLNC0180	PGSC0003DMG400028560	PGSC0003DMT400073505	sense	intergenic	385	same_strand	upstream
MSTRG.11729.1	StLNC0181	PGSC0003DMG400010625	PGSC0003DMT400027563	antisense	intergenic	3108	divergent	upstream
MSTRG.27019.11	StLNC0182	PGSC0003DMG400042452	PGSC0003DMT400092881	antisense	genic	0	containing	intronic
MSTRG.7229.1	StLNC0183	PGSC0003DMG400012926	PGSC0003DMT400033657	sense	intergenic	2837	same_strand	upstream
MSTRG.23171.1	StLNC0184	PGSC0003DMG400016605	PGSC0003DMT400042787	sense	intergenic	11974	same_strand	upstream
MSTRG.21518.1	StLNC0185	PGSC0003DMG400021547	PGSC0003DMT400055484	sense	intergenic	790	same_strand	downstream
MSTRG.21173.1	StLNC0186	PGSC0003DMG402002177	PGSC0003DMT400005563	sense	genic	0	containing	intronic
MSTRG.23790.2	StLNC0187	PGSC0003DMG400023097	PGSC0003DMT400059447	antisense	genic	0	overlapping	exonic
MSTRG.17229.1	StLNC0188	PGSC0003DMG402020702	PGSC0003DMT400053351	sense	intergenic	49316	same_strand	upstream
MSTRG.15352.1	StLNC0189	PGSC0003DMG400017557	PGSC0003DMT400045250	sense	intergenic	4818	same_strand	upstream
MSTRG.17737.4	StLNC0190	PGSC0003DMG400013537	PGSC0003DMT400035206	antisense	genic	0	nested	exonic
MSTRG.29313.14	StLNC0191	PGSC0003DMG400004677	PGSC0003DMT400011911	antisense	genic	0	overlapping	exonic
MSTRG.10420.1	StLNC0192	PGSC0003DMG400033353	PGSC0003DMT400083497	sense	intergenic	18079	same_strand	upstream
MSTRG.17873.1	StLNC0193	PGSC0003DMG400017370	PGSC0003DMT400044753	sense	intergenic	24659	same_strand	downstream
MSTRG.19011.2	StLNC0194	PGSC0003DMG400029247	PGSC0003DMT400075172	antisense	genic	0	overlapping	exonic
MSTRG.18630.1	StLNC0195	PGSC0003DMG400041975	PGSC0003DMT400092404	antisense	intergenic	14140	divergent	upstream
MSTRG.25129.3	StLNC0196	PGSC0003DMG402029824	PGSC0003DMT400076694	sense	intergenic	543	same_strand	downstream
MSTRG.23855.1	StLNC0197	PGSC0003DMG400012086	PGSC0003DMT400031520	antisense	genic	0	containing	intronic
MSTRG.2388.2	StLNC0198	PGSC0003DMG400027519	PGSC0003DMT400070776	antisense	intergenic	5279	divergent	upstream
MSTRG.882.3	StLNC0199	PGSC0003DMG400014983	PGSC0003DMT400038770	antisense	intergenic	2633	convergent	downstream
MSTRG.12603.2	StLNC0200	PGSC0003DMG402030517	PGSC0003DMT400078381	sense	intergenic	282	same_strand	downstream
MSTRG.19973.1	StLNC0201	PGSC0003DMG400002258	PGSC0003DMT400005774	sense	intergenic	954	same_strand	upstream
MSTRG.29189.1	StLNC0202	PGSC0003DMG400029263	PGSC0003DMT400075234	antisense	genic	0	containing	exonic
MSTRG.3483.22	StLNC0203	PGSC0003DMG400025186	PGSC0003DMT400064863	antisense	intergenic	1153	convergent	downstream
MSTRG.25153.2	StLNC0204	PGSC0003DMG400029855	PGSC0003DMT400076775	sense	intergenic	3906	same_strand	upstream
MSTRG.20603.3	StLNC0205	PGSC0003DMG400037639	PGSC0003DMT400088068	sense	intergenic	70034	same_strand	downstream
MSTRG.2315.1	StLNC0206	PGSC0003DMG400000246	PGSC0003DMT400000688	sense	intergenic	99	same_strand	downstream
MSTRG.10782.2	StLNC0207	PGSC0003DMG400028706	PGSC0003DMT400073876	antisense	genic	0	overlapping	exonic
MSTRG.17069.3	StLNC0208	PGSC0003DMG400030915	PGSC0003DMT400079419	sense	intergenic	21600	same_strand	upstream
MSTRG.24696.29	StLNC0209	PGSC0003DMG400011126	PGSC0003DMT400028909	sense	intergenic	5869	same_strand	upstream
MSTRG.4778.1	StLNC0210	PGSC0003DMG400008308	PGSC0003DMT400021420	sense	intergenic	1436	same_strand	upstream
MSTRG.908.1	StLNC0211	PGSC0003DMG400001237	PGSC0003DMT400003108	sense	intergenic	5772	same_strand	upstream
MSTRG.14931.1	StLNC0212	PGSC0003DMG401016632	PGSC0003DMT400042894	sense	intergenic	12663	same_strand	upstream
MSTRG.1657.33	StLNC0213	PGSC0003DMG400006795	PGSC0003DMT400017509	sense	intergenic	34963	same_strand	upstream
MSTRG.80.4	StLNC0214	PGSC0003DMG400032169	PGSC0003DMT400081953	antisense	intergenic	20569	divergent	upstream
MSTRG.28568.1	StLNC0215	PGSC0003DMG400038408	PGSC0003DMT400088837	antisense	intergenic	5768	divergent	upstream
MSTRG.17117.1	StLNC0216	PGSC0003DMG400044253	PGSC0003DMT400094682	antisense	intergenic	21347	convergent	downstream
MSTRG.17258.30	StLNC0217	PGSC0003DMG400009565	PGSC0003DMT400024747	sense	genic	0	containing	intronic
MSTRG.884.1	StLNC0218	PGSC0003DMG400014983	PGSC0003DMT400038770	antisense	intergenic	10735	convergent	downstream
MSTRG.28320.4	StLNC0219	PGSC0003DMG400002364	PGSC0003DMT400006086	antisense	genic	0	nested	exonic
MSTRG.20402.1	StLNC0220	PGSC0003DMG400002399	PGSC0003DMT400006170	antisense	intergenic	2766	divergent	upstream
MSTRG.7116.2	StLNC0221	PGSC0003DMG400023090	PGSC0003DMT400059431	sense	genic	0	containing	intronic
MSTRG.19006.4	StLNC0222	PGSC0003DMG400017091	PGSC0003DMT400044055	antisense	genic	0	overlapping	exonic
MSTRG.10570.1	StLNC0223	PGSC0003DMG400005354	PGSC0003DMT400013693	antisense	intergenic	14702	convergent	downstream
MSTRG.21379.1	StLNC0224	PGSC0003DMG400002670	PGSC0003DMT400006881	antisense	intergenic	524	divergent	upstream
MSTRG.28296.45	StLNC0225	PGSC0003DMG400014999	PGSC0003DMT400038813	antisense	intergenic	75597	convergent	downstream
MSTRG.23245.56	StLNC0226	PGSC0003DMG400021603	PGSC0003DMT400055632	antisense	genic	0	nested	exonic
MSTRG.900.4	StLNC0227	PGSC0003DMG400010936	PGSC0003DMT400028377	antisense	intergenic	314	convergent	downstream
MSTRG.27580.1	StLNC0228	PGSC0003DMG400002908	PGSC0003DMT400007529	sense	intergenic	550	same_strand	downstream
MSTRG.26276.1	StLNC0229	PGSC0003DMG402006676	PGSC0003DMT400017105	antisense	genic	0	containing	intronic
MSTRG.3644.1	StLNC0230	PGSC0003DMG401006194	PGSC0003DMT400015850	antisense	genic	0	overlapping	exonic
MSTRG.2458.4	StLNC0231	PGSC0003DMG400041164	PGSC0003DMT400091593	antisense	intergenic	3363	convergent	downstream
MSTRG.610.4	StLNC0232	PGSC0003DMG402000860	PGSC0003DMT400002245	sense	intergenic	1166	same_strand	upstream
MSTRG.2522.4	StLNC0233	PGSC0003DMG402028565	PGSC0003DMT400073532	antisense	genic	0	overlapping	exonic
MSTRG.10567.3	StLNC0234	PGSC0003DMG400005359	PGSC0003DMT400013704	antisense	intergenic	25557	divergent	upstream
MSTRG.12209.7	StLNC0235	PGSC0003DMG402009997	PGSC0003DMT400025891	antisense	intergenic	162	divergent	upstream
MSTRG.14202.5	StLNC0236	PGSC0003DMG400023316	PGSC0003DMT400059931	antisense	genic	0	containing	intronic
MSTRG.10414.1	StLNC0237	PGSC0003DMG400009741	PGSC0003DMT400025204	antisense	intergenic	439	divergent	upstream
MSTRG.28566.1	StLNC0238	PGSC0003DMG400038408	PGSC0003DMT400088837	sense	genic	0	containing	intronic
MSTRG.28744.1	StLNC0239	PGSC0003DMG400028864	PGSC0003DMT400074274	antisense	genic	0	overlapping	exonic
MSTRG.23360.6	StLNC0240	PGSC0003DMG400014385	PGSC0003DMT400037284	antisense	genic	0	containing	intronic
MSTRG.682.1	StLNC0241	PGSC0003DMG400024131	PGSC0003DMT400062005	antisense	intergenic	14978	divergent	upstream
MSTRG.3102.3	StLNC0242	PGSC0003DMG400012583	PGSC0003DMT400032774	antisense	genic	0	nested	intronic
MSTRG.26523.1	StLNC0243	PGSC0003DMG400022871	PGSC0003DMT400058871	antisense	intergenic	4635	convergent	downstream
MSTRG.23083.1	StLNC0244	PGSC0003DMG403026432	PGSC0003DMT400067970	antisense	genic	0	containing	intronic
MSTRG.17044.1	StLNC0245	PGSC0003DMG400027940	PGSC0003DMT400071814	sense	intergenic	1986	same_strand	upstream
MSTRG.10563.2	StLNC0246	PGSC0003DMG400033892	PGSC0003DMT400084243	sense	intergenic	6892	same_strand	downstream
MSTRG.17205.1	StLNC0247	PGSC0003DMG400008521	PGSC0003DMT400021974	antisense	intergenic	19784	convergent	downstream
MSTRG.20507.1	StLNC0248	PGSC0003DMG400001858	PGSC0003DMT400004695	sense	intergenic	19188	same_strand	downstream
MSTRG.10466.3	StLNC0249	PGSC0003DMG400025586	PGSC0003DMT400065742	sense	intergenic	18027	same_strand	downstream
MSTRG.20961.1	StLNC0250	PGSC0003DMG400012155	PGSC0003DMT400031686	antisense	genic	0	nested	intronic
MSTRG.10329.1	StLNC0251	PGSC0003DMG400012704	PGSC0003DMT400033082	antisense	intergenic	2557	convergent	downstream
MSTRG.2801.1	StLNC0252	PGSC0003DMG400018281	PGSC0003DMT400047082	antisense	intergenic	473	convergent	downstream
MSTRG.7677.1	StLNC0253	PGSC0003DMG400039720	PGSC0003DMT400090149	antisense	intergenic	6094	convergent	downstream
MSTRG.7863.2	StLNC0254	PGSC0003DMG400041197	PGSC0003DMT400091626	antisense	intergenic	3563	convergent	downstream
MSTRG.14707.1	StLNC0255	PGSC0003DMG400015842	PGSC0003DMT400040952	sense	intergenic	9772	same_strand	upstream
MSTRG.2786.1	StLNC0256	PGSC0003DMG400018286	PGSC0003DMT400047124	antisense	intergenic	7930	divergent	upstream
MSTRG.26240.2	StLNC0257	PGSC0003DMG400009265	PGSC0003DMT400023955	antisense	genic	0	overlapping	exonic
MSTRG.22057.1	StLNC0258	PGSC0003DMG400042188	PGSC0003DMT400092617	antisense	intergenic	6595	divergent	upstream
MSTRG.16948.2	StLNC0259	PGSC0003DMG400027456	PGSC0003DMT400070630	sense	intergenic	7362	same_strand	upstream
MSTRG.7323.1	StLNC0260	PGSC0003DMG400019019	PGSC0003DMT400048945	antisense	intergenic	1788	divergent	upstream
MSTRG.28296.9	StLNC0261	PGSC0003DMG400021934	PGSC0003DMT400056456	sense	intergenic	30822	same_strand	downstream
MSTRG.27019.23	StLNC0262	PGSC0003DMG400019686	PGSC0003DMT400050687	sense	genic	0	containing	intronic
MSTRG.21518.2	StLNC0263	PGSC0003DMG400021547	PGSC0003DMT400055484	sense	intergenic	780	same_strand	downstream
MSTRG.4843.1	StLNC0264	PGSC0003DMG400007232	PGSC0003DMT400018673	antisense	genic	0	overlapping	exonic
MSTRG.10696.1	StLNC0265	PGSC0003DMG400047157	PGSC0003DMT400097586	antisense	intergenic	7414	divergent	upstream
MSTRG.28125.1	StLNC0266	PGSC0003DMG400002238	PGSC0003DMT400005722	antisense	genic	0	overlapping	exonic
MSTRG.28313.3	StLNC0267	PGSC0003DMG400035822	PGSC0003DMT400086251	sense	intergenic	6421	same_strand	downstream
MSTRG.3144.1	StLNC0268	PGSC0003DMG400012569	PGSC0003DMT400032735	antisense	intergenic	5651	convergent	downstream
MSTRG.10027.1	StLNC0269	PGSC0003DMG400006339	PGSC0003DMT400016219	sense	intergenic	7368	same_strand	upstream
MSTRG.1663.5	StLNC0270	PGSC0003DMG400006863	PGSC0003DMT400017698	antisense	intergenic	1896	convergent	downstream
MSTRG.12953.13	StLNC0271	PGSC0003DMG400013473	PGSC0003DMT400035030	antisense	genic	0	overlapping	exonic
MSTRG.19991.2	StLNC0272	PGSC0003DMG400033622	PGSC0003DMT400083840	antisense	intergenic	8888	convergent	downstream
MSTRG.17005.4	StLNC0273	PGSC0003DMG400030748	PGSC0003DMT400079004	sense	intergenic	8855	same_strand	downstream
MSTRG.7308.1	StLNC0274	PGSC0003DMG400012384	PGSC0003DMT400032225	antisense	intergenic	3275	convergent	downstream
MSTRG.27712.3	StLNC0275	PGSC0003DMG402000299	PGSC0003DMT400000808	antisense	intergenic	6991	convergent	downstream
MSTRG.11981.1	StLNC0276	PGSC0003DMG400005157	PGSC0003DMT400013206	sense	intergenic	2539	same_strand	upstream
MSTRG.13628.2	StLNC0277	PGSC0003DMG400007009	PGSC0003DMT400018045	antisense	genic	0	overlapping	exonic
MSTRG.14881.1	StLNC0278	PGSC0003DMG400027979	PGSC0003DMT400071914	sense	intergenic	21647	same_strand	upstream
MSTRG.18941.1	StLNC0279	PGSC0003DMG400012502	PGSC0003DMT400032549	sense	genic	0	containing	intronic
MSTRG.17258.31	StLNC0280	PGSC0003DMG400009565	PGSC0003DMT400024747	sense	genic	0	containing	intronic
MSTRG.27445.1	StLNC0281	PGSC0003DMG400007797	PGSC0003DMT400020128	sense	intergenic	7583	same_strand	downstream
MSTRG.3483.12	StLNC0282	PGSC0003DMG400025186	PGSC0003DMT400064863	antisense	intergenic	319	convergent	downstream
MSTRG.27034.1	StLNC0283	PGSC0003DMG400038135	PGSC0003DMT400088564	antisense	intergenic	2947	convergent	downstream
MSTRG.16055.1	StLNC0284	PGSC0003DMG400033028	PGSC0003DMT400083025	antisense	genic	0	overlapping	exonic
MSTRG.29313.1	StLNC0285	PGSC0003DMG400004677	PGSC0003DMT400011911	antisense	genic	0	overlapping	exonic
MSTRG.2474.1	StLNC0286	PGSC0003DMG400022496	PGSC0003DMT400057924	sense	intergenic	616	same_strand	upstream
MSTRG.4054.2	StLNC0287	PGSC0003DMG400038270	PGSC0003DMT400088699	sense	genic	0	containing	intronic
MSTRG.985.1	StLNC0288	PGSC0003DMG400001211	PGSC0003DMT400003054	sense	intergenic	7440	same_strand	upstream
MSTRG.12100.3	StLNC0289	PGSC0003DMG400009876	PGSC0003DMT400025559	sense	intergenic	17382	same_strand	upstream
MSTRG.27533.5	StLNC0290	PGSC0003DMG400007899	PGSC0003DMT400020443	antisense	intergenic	1157	convergent	downstream
MSTRG.18358.1	StLNC0291	PGSC0003DMG400017307	PGSC0003DMT400044590	antisense	intergenic	2475	convergent	downstream
MSTRG.17711.1	StLNC0292	PGSC0003DMG400013571	PGSC0003DMT400035319	sense	intergenic	652	same_strand	downstream
MSTRG.26338.1	StLNC0293	PGSC0003DMG400040941	PGSC0003DMT400091370	sense	intergenic	37349	same_strand	downstream
MSTRG.23833.2	StLNC0294	PGSC0003DMG400035682	PGSC0003DMT400086111	sense	intergenic	14339	same_strand	downstream
MSTRG.6368.1	StLNC0295	PGSC0003DMG401000506	PGSC0003DMT400001354	sense	intergenic	12194	same_strand	upstream
MSTRG.5154.1	StLNC0296	PGSC0003DMG400022418	PGSC0003DMT400057744	antisense	genic	0	overlapping	exonic
MSTRG.23007.1	StLNC0297	PGSC0003DMG403029613	PGSC0003DMT400076162	antisense	genic	0	overlapping	exonic
MSTRG.2388.1	StLNC0298	PGSC0003DMG400027519	PGSC0003DMT400070776	antisense	intergenic	5260	divergent	upstream
MSTRG.22379.2	StLNC0299	PGSC0003DMG400007534	PGSC0003DMT400019487	antisense	intergenic	13453	convergent	downstream
MSTRG.6679.3	StLNC0300	PGSC0003DMG401015976	PGSC0003DMT400041276	sense	genic	0	containing	intronic
MSTRG.7608.1	StLNC0301	PGSC0003DMG400021073	PGSC0003DMT400054307	antisense	genic	0	overlapping	exonic
MSTRG.1657.16	StLNC0302	PGSC0003DMG400006794	PGSC0003DMT400017493	sense	genic	0	containing	intronic
MSTRG.7256.6	StLNC0303	PGSC0003DMG400011964	PGSC0003DMT400031233	antisense	intergenic	1747	divergent	upstream
MSTRG.21944.2	StLNC0304	PGSC0003DMG400047231	PGSC0003DMT400097660	sense	intergenic	6710	same_strand	downstream
MSTRG.28072.6	StLNC0305	PGSC0003DMG400018897	PGSC0003DMT400048642	antisense	intergenic	1228	convergent	downstream
MSTRG.7676.1	StLNC0306	PGSC0003DMG400039720	PGSC0003DMT400090149	antisense	intergenic	10574	convergent	downstream
MSTRG.7147.2	StLNC0307	PGSC0003DMG400009763	PGSC0003DMT400025276	antisense	intergenic	14162	convergent	downstream
MSTRG.26481.1	StLNC0308	PGSC0003DMG400003484	PGSC0003DMT400008944	antisense	intergenic	913	convergent	downstream
MSTRG.7050.2	StLNC0309	PGSC0003DMG400038321	PGSC0003DMT400088750	antisense	genic	0	containing	intronic
MSTRG.20602.4	StLNC0310	PGSC0003DMG400004829	PGSC0003DMT400012323	antisense	intergenic	4612	divergent	upstream
MSTRG.20105.1	StLNC0311	PGSC0003DMG400014768	PGSC0003DMT400038277	sense	intergenic	11713	same_strand	upstream
MSTRG.18290.8	StLNC0312	PGSC0003DMG400017319	PGSC0003DMT400044621	sense	intergenic	625	same_strand	upstream
MSTRG.1509.1	StLNC0313	PGSC0003DMG400005209	PGSC0003DMT400013356	antisense	genic	0	containing	intronic
MSTRG.17596.1	StLNC0314	PGSC0003DMG400032793	PGSC0003DMT400082752	antisense	intergenic	4685	divergent	upstream
MSTRG.22745.2	StLNC0315	PGSC0003DMG404006439	PGSC0003DMT400016484	antisense	intergenic	1259	divergent	upstream
MSTRG.15270.1	StLNC0316	PGSC0003DMG400030781	PGSC0003DMT400079094	antisense	intergenic	9236	divergent	upstream
MSTRG.3811.2	StLNC0317	PGSC0003DMG400036329	PGSC0003DMT400086758	antisense	intergenic	4064	divergent	upstream
MSTRG.18297.1	StLNC0318	PGSC0003DMG400017324	PGSC0003DMT400044657	antisense	genic	0	containing	intronic
MSTRG.10979.2	StLNC0319	PGSC0003DMG400035816	PGSC0003DMT400086245	sense	intergenic	7179	same_strand	upstream
MSTRG.22107.1	StLNC0320	PGSC0003DMG400045752	PGSC0003DMT400096181	antisense	intergenic	18679	convergent	downstream
MSTRG.15262.4	StLNC0321	PGSC0003DMG400030782	PGSC0003DMT400079095	antisense	intergenic	738	convergent	downstream
MSTRG.11016.1	StLNC0322	PGSC0003DMG400031195	PGSC0003DMT400080123	antisense	genic	0	nested	exonic
MSTRG.1657.17	StLNC0323	PGSC0003DMG400006794	PGSC0003DMT400017493	sense	genic	0	containing	intronic
MSTRG.887.1	StLNC0324	PGSC0003DMG400037288	PGSC0003DMT400087717	antisense	intergenic	10798	convergent	downstream
MSTRG.26351.3	StLNC0325	PGSC0003DMG400019765	PGSC0003DMT400050887	antisense	intergenic	2364	convergent	downstream
MSTRG.3554.1	StLNC0326	PGSC0003DMG400030970	PGSC0003DMT400079538	antisense	intergenic	4319	convergent	downstream
MSTRG.12100.1	StLNC0327	PGSC0003DMG400009943	PGSC0003DMT400025756	antisense	genic	0	containing	intronic
MSTRG.23084.13	StLNC0328	PGSC0003DMG400026433	PGSC0003DMT400067981	sense	genic	0	containing	intronic
MSTRG.19013.1	StLNC0329	PGSC0003DMG401017090	PGSC0003DMT400044046	antisense	genic	0	overlapping	exonic
MSTRG.21901.1	StLNC0330	PGSC0003DMG400005417	PGSC0003DMT400013847	antisense	genic	0	containing	intronic
MSTRG.2451.1	StLNC0331	PGSC0003DMG400022472	PGSC0003DMT400057864	antisense	intergenic	1223	divergent	upstream
MSTRG.19292.1	StLNC0332	PGSC0003DMG400020999	PGSC0003DMT400054145	antisense	genic	0	overlapping	exonic
MSTRG.23563.1	StLNC0333	PGSC0003DMG400021851	PGSC0003DMT400056241	antisense	genic	0	overlapping	exonic
MSTRG.1213.4	StLNC0334	PGSC0003DMG400011334	PGSC0003DMT400029476	antisense	intergenic	4707	convergent	downstream
MSTRG.17823.1	StLNC0335	PGSC0003DMG400017390	PGSC0003DMT400044808	sense	intergenic	1920	same_strand	upstream
MSTRG.14011.1	StLNC0336	PGSC0003DMG400023427	PGSC0003DMT400060223	sense	intergenic	128	same_strand	upstream
MSTRG.3492.3	StLNC0337	PGSC0003DMG400025172	PGSC0003DMT400064813	antisense	intergenic	856	convergent	downstream
MSTRG.80.36	StLNC0338	PGSC0003DMG400032169	PGSC0003DMT400081953	antisense	intergenic	45417	divergent	upstream
MSTRG.3483.21	StLNC0339	PGSC0003DMG400025186	PGSC0003DMT400064863	antisense	intergenic	319	convergent	downstream
MSTRG.10482.1	StLNC0340	PGSC0003DMG400034960	PGSC0003DMT400085389	sense	intergenic	78937	same_strand	downstream
MSTRG.18059.8	StLNC0341	PGSC0003DMG400026195	PGSC0003DMT400067383	sense	genic	0	containing	intronic
MSTRG.19121.1	StLNC0342	PGSC0003DMG400044521	PGSC0003DMT400094950	antisense	intergenic	3029	divergent	upstream
MSTRG.28520.2	StLNC0343	PGSC0003DMG400034913	PGSC0003DMT400085342	antisense	intergenic	38943	divergent	upstream
MSTRG.22783.1	StLNC0344	PGSC0003DMG400006105	PGSC0003DMT400015640	sense	intergenic	890	same_strand	downstream
MSTRG.20250.1	StLNC0345	PGSC0003DMG400001955	PGSC0003DMT400004934	antisense	intergenic	576	divergent	upstream
MSTRG.19007.3	StLNC0346	PGSC0003DMG400014104	PGSC0003DMT400036586	antisense	intergenic	328	divergent	upstream
MSTRG.1869.3	StLNC0347	PGSC0003DMG400001681	PGSC0003DMT400004222	sense	genic	0	containing	intronic
MSTRG.28643.7	StLNC0348	PGSC0003DMG400026463	PGSC0003DMT400068047	antisense	intergenic	5864	convergent	downstream
MSTRG.19415.4	StLNC0349	PGSC0003DMG400039179	PGSC0003DMT400089608	antisense	intergenic	6591	divergent	upstream
MSTRG.18649.1	StLNC0350	PGSC0003DMG401013921	PGSC0003DMT400036150	antisense	genic	0	nested	exonic
MSTRG.10567.1	StLNC0351	PGSC0003DMG400005359	PGSC0003DMT400013704	antisense	intergenic	24784	divergent	upstream
MSTRG.14754.1	StLNC0352	PGSC0003DMG400029684	PGSC0003DMT400076349	sense	intergenic	7432	same_strand	downstream
MSTRG.28127.1	StLNC0353	PGSC0003DMG400002238	PGSC0003DMT400005722	antisense	intergenic	51182	convergent	downstream
MSTRG.1801.2	StLNC0354	PGSC0003DMG400042115	PGSC0003DMT400092544	antisense	intergenic	24042	convergent	downstream
MSTRG.25496.1	StLNC0355	PGSC0003DMG400015681	PGSC0003DMT400040528	sense	intergenic	1334	same_strand	downstream
MSTRG.15262.12	StLNC0356	PGSC0003DMG400030782	PGSC0003DMT400079095	antisense	intergenic	912	convergent	downstream
MSTRG.23989.1	StLNC0357	PGSC0003DMG400017689	PGSC0003DMT400045604	sense	intergenic	33060	same_strand	upstream
MSTRG.8225.1	StLNC0358	PGSC0003DMG400031057	PGSC0003DMT400079757	sense	intergenic	11162	same_strand	upstream
MSTRG.19631.1	StLNC0359	PGSC0003DMG400002288	PGSC0003DMT400005882	antisense	genic	0	overlapping	exonic
MSTRG.11254.47	StLNC0360	PGSC0003DMG400000783	PGSC0003DMT400002054	antisense	genic	0	overlapping	exonic
MSTRG.1848.1	StLNC0361	PGSC0003DMG400001703	PGSC0003DMT400004298	sense	intergenic	7809	same_strand	downstream
MSTRG.7571.1	StLNC0362	PGSC0003DMG400018848	PGSC0003DMT400048522	antisense	intergenic	1378	convergent	downstream
MSTRG.15262.2	StLNC0363	PGSC0003DMG400030782	PGSC0003DMT400079095	antisense	intergenic	738	convergent	downstream
MSTRG.2784.2	StLNC0364	PGSC0003DMG400018284	PGSC0003DMT400047089	antisense	intergenic	5401	divergent	upstream
MSTRG.24362.1	StLNC0365	PGSC0003DMG400010867	PGSC0003DMT400028174	antisense	intergenic	3257	divergent	upstream
MSTRG.11646.6	StLNC0366	PGSC0003DMG400009349	PGSC0003DMT400024193	antisense	genic	0	overlapping	exonic
MSTRG.28576.3	StLNC0367	PGSC0003DMG400014467	PGSC0003DMT400037492	antisense	genic	0	nested	exonic
MSTRG.23360.4	StLNC0368	PGSC0003DMG400014385	PGSC0003DMT400037284	antisense	genic	0	containing	intronic
MSTRG.26650.2	StLNC0369	PGSC0003DMG400009460	PGSC0003DMT400024472	antisense	intergenic	2519	convergent	downstream
MSTRG.20600.2	StLNC0370	PGSC0003DMG400004829	PGSC0003DMT400012323	antisense	intergenic	55476	divergent	upstream
MSTRG.23831.1	StLNC0371	PGSC0003DMG400003243	PGSC0003DMT400008404	antisense	intergenic	6847	divergent	upstream
MSTRG.4998.1	StLNC0372	PGSC0003DMG400010250	PGSC0003DMT400026550	antisense	intergenic	8429	convergent	downstream
MSTRG.16611.9	StLNC0373	PGSC0003DMG400020114	PGSC0003DMT400051826	sense	intergenic	4440	same_strand	downstream
MSTRG.80.32	StLNC0374	PGSC0003DMG400032127	PGSC0003DMT400081823	sense	intergenic	13188	same_strand	upstream
MSTRG.10686.4	StLNC0375	PGSC0003DMG400035656	PGSC0003DMT400086085	sense	intergenic	50249	same_strand	upstream
MSTRG.23245.46	StLNC0376	PGSC0003DMG400021603	PGSC0003DMT400055632	antisense	genic	0	nested	exonic
MSTRG.3251.1	StLNC0377	PGSC0003DMG402025733	PGSC0003DMT400066100	sense	intergenic	2322	same_strand	upstream
MSTRG.2522.7	StLNC0378	PGSC0003DMG402028565	PGSC0003DMT400073532	antisense	intergenic	3363	convergent	downstream
MSTRG.15899.1	StLNC0379	PGSC0003DMG400028916	PGSC0003DMT400074403	antisense	genic	0	containing	intronic
MSTRG.21944.1	StLNC0380	PGSC0003DMG400047231	PGSC0003DMT400097660	sense	intergenic	6677	same_strand	downstream
MSTRG.21861.1	StLNC0381	PGSC0003DMG400026789	PGSC0003DMT400068885	sense	intergenic	7307	same_strand	upstream
MSTRG.25129.2	StLNC0382	PGSC0003DMG402029824	PGSC0003DMT400076694	sense	intergenic	539	same_strand	downstream
MSTRG.23320.1	StLNC0383	PGSC0003DMG400008694	PGSC0003DMT400022427	sense	intergenic	1028	same_strand	downstream
MSTRG.6926.1	StLNC0384	PGSC0003DMG400036104	PGSC0003DMT400086533	sense	intergenic	6609	same_strand	upstream
MSTRG.10651.4	StLNC0385	PGSC0003DMG400038483	PGSC0003DMT400088912	antisense	intergenic	14767	divergent	upstream
MSTRG.1869.5	StLNC0386	PGSC0003DMG400001711	PGSC0003DMT400004314	antisense	genic	0	containing	intronic
MSTRG.1943.1	StLNC0387	PGSC0003DMG400025994	PGSC0003DMT400066867	sense	intergenic	83	same_strand	downstream
MSTRG.194.1	StLNC0388	PGSC0003DMG400021383	PGSC0003DMT400055111	antisense	intergenic	1235	divergent	upstream
MSTRG.2342.4	StLNC0389	PGSC0003DMG400003290	PGSC0003DMT400008506	sense	intergenic	16853	same_strand	downstream
MSTRG.1663.6	StLNC0390	PGSC0003DMG400006863	PGSC0003DMT400017698	antisense	intergenic	1826	convergent	downstream
MSTRG.13460.2	StLNC0391	PGSC0003DMG400023041	PGSC0003DMT400059300	sense	intergenic	3772	same_strand	upstream
MSTRG.1657.6	StLNC0392	PGSC0003DMG400006794	PGSC0003DMT400017493	sense	genic	0	containing	intronic
MSTRG.24990.1	StLNC0393	PGSC0003DMG400028211	PGSC0003DMT400072508	antisense	intergenic	1710	divergent	upstream
MSTRG.22974.1	StLNC0394	PGSC0003DMG402001548	PGSC0003DMT400003923	antisense	intergenic	371	convergent	downstream
MSTRG.11699.1	StLNC0395	PGSC0003DMG400004929	PGSC0003DMT400012607	antisense	intergenic	1847	convergent	downstream
MSTRG.11279.6	StLNC0396	PGSC0003DMG400008615	PGSC0003DMT400022199	sense	intergenic	1752	same_strand	downstream
MSTRG.25546.1	StLNC0397	PGSC0003DMG400016207	PGSC0003DMT400041783	antisense	genic	0	nested	exonic
MSTRG.18059.24	StLNC0398	PGSC0003DMG400035134	PGSC0003DMT400085563	antisense	intergenic	7766	convergent	downstream
MSTRG.2871.1	StLNC0399	PGSC0003DMG400013099	PGSC0003DMT400034092	antisense	genic	0	overlapping	exonic
MSTRG.27519.2	StLNC0400	PGSC0003DMG400038772	PGSC0003DMT400089201	sense	intergenic	6148	same_strand	upstream
MSTRG.796.1	StLNC0401	PGSC0003DMG400040619	PGSC0003DMT400091048	antisense	intergenic	14503	convergent	downstream
MSTRG.23245.13	StLNC0402	PGSC0003DMG400021603	PGSC0003DMT400055632	antisense	genic	0	nested	exonic
MSTRG.27533.3	StLNC0403	PGSC0003DMG400007899	PGSC0003DMT400020443	antisense	intergenic	1157	convergent	downstream
MSTRG.6097.1	StLNC0404	PGSC0003DMG400010102	PGSC0003DMT400026215	antisense	intergenic	10762	convergent	downstream
MSTRG.5509.3	StLNC0405	PGSC0003DMG400001514	PGSC0003DMT400003820	antisense	intergenic	270	convergent	downstream
MSTRG.23245.52	StLNC0406	PGSC0003DMG400021603	PGSC0003DMT400055632	antisense	genic	0	nested	exonic
MSTRG.10607.10	StLNC0407	PGSC0003DMG400028995	PGSC0003DMT400074579	antisense	intergenic	44306	convergent	downstream
MSTRG.8760.7	StLNC0408	PGSC0003DMG400024646	PGSC0003DMT400063357	antisense	intergenic	3443	convergent	downstream
MSTRG.24373.2	StLNC0409	PGSC0003DMG400016824	PGSC0003DMT400043330	antisense	intergenic	33156	convergent	downstream
MSTRG.23989.3	StLNC0410	PGSC0003DMG400017689	PGSC0003DMT400045604	sense	intergenic	35820	same_strand	upstream
MSTRG.28296.23	StLNC0411	PGSC0003DMG400014999	PGSC0003DMT400038813	antisense	intergenic	86610	convergent	downstream
MSTRG.7063.11	StLNC0412	PGSC0003DMG400040084	PGSC0003DMT400090513	antisense	genic	0	containing	intronic
MSTRG.20602.2	StLNC0413	PGSC0003DMG400004829	PGSC0003DMT400012323	antisense	intergenic	3916	divergent	upstream
MSTRG.23245.33	StLNC0414	PGSC0003DMG400021603	PGSC0003DMT400055632	antisense	genic	0	nested	exonic
MSTRG.28434.1	StLNC0415	PGSC0003DMG400041505	PGSC0003DMT400091934	antisense	intergenic	1409	convergent	downstream
MSTRG.15765.2	StLNC0416	PGSC0003DMG402016495	PGSC0003DMT400042528	antisense	genic	0	overlapping	exonic
MSTRG.23827.3	StLNC0417	PGSC0003DMG400003245	PGSC0003DMT400008406	sense	intergenic	21595	same_strand	upstream
MSTRG.20929.1	StLNC0418	PGSC0003DMG400012313	PGSC0003DMT400032084	antisense	intergenic	3813	convergent	downstream
MSTRG.10698.1	StLNC0419	PGSC0003DMG400047157	PGSC0003DMT400097586	sense	intergenic	12375	same_strand	downstream
MSTRG.9105.1	StLNC0420	PGSC0003DMG400005736	PGSC0003DMT400014702	sense	genic	0	nested	intronic
MSTRG.29303.1	StLNC0421	PGSC0003DMG400004674	PGSC0003DMT400011907	antisense	genic	0	nested	exonic
MSTRG.5190.1	StLNC0422	PGSC0003DMG402022351	PGSC0003DMT400057559	antisense	intergenic	581	convergent	downstream
MSTRG.27965.3	StLNC0423	PGSC0003DMG400025620	PGSC0003DMT400065820	antisense	intergenic	752	convergent	downstream
MSTRG.23314.9	StLNC0424	PGSC0003DMG400040086	PGSC0003DMT400090515	antisense	intergenic	205	convergent	downstream
MSTRG.3483.6	StLNC0425	PGSC0003DMG400025186	PGSC0003DMT400064863	antisense	intergenic	287	convergent	downstream
MSTRG.21937.3	StLNC0426	PGSC0003DMG400009787	PGSC0003DMT400025349	antisense	intergenic	13277	divergent	upstream
MSTRG.28296.34	StLNC0427	PGSC0003DMG400021934	PGSC0003DMT400056456	sense	intergenic	90858	same_strand	downstream
MSTRG.5155.1	StLNC0428	PGSC0003DMG400022418	PGSC0003DMT400057744	antisense	genic	0	overlapping	exonic
MSTRG.2943.4	StLNC0429	PGSC0003DMG400024918	PGSC0003DMT400064125	sense	intergenic	1775	same_strand	upstream
MSTRG.10631.1	StLNC0430	PGSC0003DMG400039986	PGSC0003DMT400090415	antisense	intergenic	13639	convergent	downstream
MSTRG.13146.3	StLNC0431	PGSC0003DMG400014918	PGSC0003DMT400038619	antisense	intergenic	9351	divergent	upstream
MSTRG.17337.1	StLNC0432	PGSC0003DMG400022092	PGSC0003DMT400056808	sense	intergenic	4976	same_strand	upstream
MSTRG.4055.15	StLNC0433	PGSC0003DMG400021481	PGSC0003DMT400055341	antisense	intergenic	13063	convergent	downstream
MSTRG.14638.6	StLNC0434	PGSC0003DMG400045703	PGSC0003DMT400096132	antisense	intergenic	75184	convergent	downstream
MSTRG.28514.12	StLNC0435	PGSC0003DMG400006612	PGSC0003DMT400016907	antisense	intergenic	6225	convergent	downstream
MSTRG.22887.5	StLNC0436	PGSC0003DMG400017219	PGSC0003DMT400044348	sense	intergenic	4318	same_strand	downstream
MSTRG.29313.29	StLNC0437	PGSC0003DMG400004676	PGSC0003DMT400011910	antisense	genic	0	overlapping	exonic
MSTRG.6958.1	StLNC0438	PGSC0003DMG400009088	PGSC0003DMT400023470	antisense	intergenic	2107	divergent	upstream
MSTRG.25123.1	StLNC0439	PGSC0003DMG400029822	PGSC0003DMT400076678	sense	intergenic	77	same_strand	upstream
MSTRG.17258.42	StLNC0440	PGSC0003DMG400009565	PGSC0003DMT400024747	sense	genic	0	containing	intronic
MSTRG.21786.2	StLNC0441	PGSC0003DMG400026613	PGSC0003DMT400068437	sense	intergenic	7559	same_strand	upstream
MSTRG.22817.1	StLNC0442	PGSC0003DMG400012089	PGSC0003DMT400031525	antisense	intergenic	457	divergent	upstream
MSTRG.26205.1	StLNC0443	PGSC0003DMG400013931	PGSC0003DMT400036196	sense	genic	0	containing	intronic
MSTRG.14638.4	StLNC0444	PGSC0003DMG400045703	PGSC0003DMT400096132	antisense	intergenic	75097	convergent	downstream
MSTRG.14513.1	StLNC0445	PGSC0003DMG400008695	PGSC0003DMT400022437	antisense	genic	0	overlapping	exonic
MSTRG.10552.1	StLNC0446	PGSC0003DMG400046665	PGSC0003DMT400097094	antisense	intergenic	45549	convergent	downstream
MSTRG.12101.1	StLNC0447	PGSC0003DMG400009943	PGSC0003DMT400025756	sense	genic	0	containing	intronic
MSTRG.1420.1	StLNC0448	PGSC0003DMG400008999	PGSC0003DMT400023239	antisense	genic	0	overlapping	exonic
MSTRG.26682.1	StLNC0449	PGSC0003DMG402029995	PGSC0003DMT400077130	sense	intergenic	158	same_strand	upstream
MSTRG.1854.2	StLNC0450	PGSC0003DMG400001676	PGSC0003DMT400004212	antisense	intergenic	31408	divergent	upstream
MSTRG.3831.1	StLNC0451	PGSC0003DMG400040798	PGSC0003DMT400091227	sense	intergenic	3677	same_strand	upstream
MSTRG.4438.1	StLNC0452	PGSC0003DMG400006898	PGSC0003DMT400017760	sense	intergenic	1072	same_strand	downstream
MSTRG.3774.9	StLNC0453	PGSC0003DMG400042313	PGSC0003DMT400092742	antisense	genic	0	containing	intronic
MSTRG.27109.1	StLNC0454	PGSC0003DMG400039122	PGSC0003DMT400089551	sense	intergenic	5522	same_strand	downstream
MSTRG.1131.1	StLNC0455	PGSC0003DMG400013119	PGSC0003DMT400034149	antisense	intergenic	4686	convergent	downstream
MSTRG.19011.1	StLNC0456	PGSC0003DMG400029247	PGSC0003DMT400075172	antisense	genic	0	overlapping	exonic
MSTRG.2796.10	StLNC0457	PGSC0003DMG400018242	PGSC0003DMT400046967	sense	intergenic	2036	same_strand	downstream
MSTRG.14525.1	StLNC0458	PGSC0003DMG400003469	PGSC0003DMT400008916	antisense	intergenic	1862	convergent	downstream
MSTRG.10840.1	StLNC0459	PGSC0003DMG400007269	PGSC0003DMT400018756	antisense	intergenic	2223	divergent	upstream
MSTRG.13959.1	StLNC0460	PGSC0003DMG400008449	PGSC0003DMT400021768	antisense	genic	0	overlapping	exonic
MSTRG.23245.11	StLNC0461	PGSC0003DMG400021603	PGSC0003DMT400055632	antisense	genic	0	nested	exonic
MSTRG.23833.1	StLNC0462	PGSC0003DMG400035682	PGSC0003DMT400086111	sense	intergenic	14337	same_strand	downstream
MSTRG.17525.5	StLNC0463	PGSC0003DMG400019106	PGSC0003DMT400049159	sense	intergenic	10114	same_strand	downstream
MSTRG.27019.10	StLNC0464	PGSC0003DMG400035494	PGSC0003DMT400085923	sense	intergenic	22694	same_strand	downstream
MSTRG.3125.4	StLNC0465	PGSC0003DMG400012575	PGSC0003DMT400032753	antisense	intergenic	160	convergent	downstream
MSTRG.5112.9	StLNC0466	PGSC0003DMG400022438	PGSC0003DMT400057795	sense	intergenic	5387	same_strand	upstream
MSTRG.21974.1	StLNC0467	PGSC0003DMG400036069	PGSC0003DMT400086498	antisense	intergenic	5239	divergent	upstream
MSTRG.8101.2	StLNC0468	PGSC0003DMG400003161	PGSC0003DMT400008202	antisense	intergenic	2435	convergent	downstream
MSTRG.19714.3	StLNC0469	PGSC0003DMG400021749	PGSC0003DMT400055991	sense	intergenic	6343	same_strand	downstream
MSTRG.2054.1	StLNC0470	PGSC0003DMG400012747	PGSC0003DMT400033191	sense	intergenic	273	same_strand	upstream
MSTRG.80.1	StLNC0471	PGSC0003DMG400032127	PGSC0003DMT400081823	sense	intergenic	10528	same_strand	upstream
MSTRG.20032.1	StLNC0472	PGSC0003DMG400014509	PGSC0003DMT400037627	antisense	intergenic	8363	convergent	downstream
MSTRG.23245.50	StLNC0473	PGSC0003DMG400021603	PGSC0003DMT400055632	antisense	genic	0	nested	exonic
MSTRG.20484.11	StLNC0474	PGSC0003DMG401024222	PGSC0003DMT400062254	sense	intergenic	286	same_strand	upstream
MSTRG.3774.7	StLNC0475	PGSC0003DMG400042313	PGSC0003DMT400092742	antisense	genic	0	containing	intronic
MSTRG.20895.1	StLNC0476	PGSC0003DMG402012324	PGSC0003DMT400032104	antisense	intergenic	4963	divergent	upstream
MSTRG.21505.1	StLNC0477	PGSC0003DMG400021565	PGSC0003DMT400055533	antisense	intergenic	685	convergent	downstream
MSTRG.17493.2	StLNC0478	PGSC0003DMG400045088	PGSC0003DMT400095517	antisense	intergenic	17609	convergent	downstream
MSTRG.23245.31	StLNC0479	PGSC0003DMG400021603	PGSC0003DMT400055632	antisense	genic	0	nested	exonic
MSTRG.26301.1	StLNC0480	PGSC0003DMG400012063	PGSC0003DMT400031457	antisense	intergenic	18427	divergent	upstream
MSTRG.22239.1	StLNC0481	PGSC0003DMG400008578	PGSC0003DMT400022115	sense	intergenic	101	same_strand	upstream
MSTRG.26022.1	StLNC0482	PGSC0003DMG400009223	PGSC0003DMT400023842	sense	intergenic	4897	same_strand	upstream
MSTRG.12953.11	StLNC0483	PGSC0003DMG400013473	PGSC0003DMT400035030	antisense	genic	0	overlapping	exonic
MSTRG.10594.2	StLNC0484	PGSC0003DMG400009778	PGSC0003DMT400025332	antisense	intergenic	1186	convergent	downstream
MSTRG.15262.15	StLNC0485	PGSC0003DMG400030782	PGSC0003DMT400079095	antisense	intergenic	1424	convergent	downstream
MSTRG.27896.4	StLNC0486	PGSC0003DMG402024331	PGSC0003DMT400062528	antisense	genic	0	overlapping	exonic
MSTRG.24688.1	StLNC0487	PGSC0003DMG402008383	PGSC0003DMT400021607	sense	intergenic	1103	same_strand	downstream
MSTRG.1243.34	StLNC0488	PGSC0003DMG400046162	PGSC0003DMT400096591	antisense	genic	0	containing	intronic
MSTRG.3012.1	StLNC0489	PGSC0003DMG400023781	PGSC0003DMT400061125	antisense	intergenic	5209	divergent	upstream
MSTRG.1353.2	StLNC0490	PGSC0003DMG400032110	PGSC0003DMT400081764	antisense	intergenic	5259	convergent	downstream
MSTRG.27146.3	StLNC0491	PGSC0003DMG400003020	PGSC0003DMT400007810	sense	intergenic	1987	same_strand	upstream
MSTRG.9298.2	StLNC0492	PGSC0003DMG400002611	PGSC0003DMT400006719	antisense	intergenic	3731	convergent	downstream
MSTRG.19613.2	StLNC0493	PGSC0003DMG400034868	PGSC0003DMT400085297	antisense	intergenic	25189	divergent	upstream
MSTRG.18190.1	StLNC0494	PGSC0003DMG400032822	PGSC0003DMT400082802	sense	intergenic	1144	same_strand	upstream
MSTRG.23314.8	StLNC0495	PGSC0003DMG400040086	PGSC0003DMT400090515	antisense	intergenic	205	convergent	downstream
MSTRG.28277.3	StLNC0496	PGSC0003DMG400016754	PGSC0003DMT400043177	antisense	intergenic	8727	divergent	upstream
MSTRG.11254.30	StLNC0497	PGSC0003DMG400000783	PGSC0003DMT400002054	antisense	genic	0	overlapping	exonic
MSTRG.7593.2	StLNC0498	PGSC0003DMG400015141	PGSC0003DMT400039162	antisense	intergenic	27558	convergent	downstream
MSTRG.27019.8	StLNC0499	PGSC0003DMG400035494	PGSC0003DMT400085923	sense	intergenic	22551	same_strand	downstream
MSTRG.749.1	StLNC0500	PGSC0003DMG400045050	PGSC0003DMT400095479	sense	intergenic	30707	same_strand	downstream
MSTRG.5193.1	StLNC0501	PGSC0003DMG402022350	PGSC0003DMT400057549	antisense	intergenic	656	convergent	downstream
MSTRG.4952.1	StLNC0502	PGSC0003DMG400010236	PGSC0003DMT400026515	antisense	genic	0	nested	exonic
MSTRG.14803.1	StLNC0503	PGSC0003DMG400024243	PGSC0003DMT400062300	antisense	intergenic	2367	convergent	downstream
MSTRG.14931.2	StLNC0504	PGSC0003DMG401016632	PGSC0003DMT400042894	sense	intergenic	9371	same_strand	upstream
MSTRG.14655.2	StLNC0505	PGSC0003DMG400017130	PGSC0003DMT400044134	sense	intergenic	80295	same_strand	upstream
MSTRG.1657.29	StLNC0506	PGSC0003DMG400006794	PGSC0003DMT400017493	sense	intergenic	28644	same_strand	downstream
MSTRG.7063.7	StLNC0507	PGSC0003DMG400039430	PGSC0003DMT400089859	antisense	genic	0	overlapping	exonic
MSTRG.14784.3	StLNC0508	PGSC0003DMG400038056	PGSC0003DMT400088485	sense	genic	0	containing	intronic
MSTRG.2014.1	StLNC0509	PGSC0003DMG400025962	PGSC0003DMT400066774	sense	intergenic	1398	same_strand	downstream
MSTRG.21245.1	StLNC0510	PGSC0003DMG400008912	PGSC0003DMT400023026	antisense	intergenic	2170	divergent	upstream
MSTRG.7220.2	StLNC0511	PGSC0003DMG400041275	PGSC0003DMT400091704	sense	intergenic	14015	same_strand	downstream
MSTRG.29201.1	StLNC0512	PGSC0003DMG400029352	PGSC0003DMT400075471	sense	intergenic	473	same_strand	downstream
MSTRG.11642.1	StLNC0513	PGSC0003DMG400009330	PGSC0003DMT400024138	sense	intergenic	19758	same_strand	downstream
MSTRG.21841.3	StLNC0514	PGSC0003DMG400030270	PGSC0003DMT400077817	sense	intergenic	1680	same_strand	upstream
MSTRG.29317.181	StLNC0515	PGSC0003DMG400004593	PGSC0003DMT400011693	antisense	intergenic	6571	divergent	upstream
MSTRG.2618.1	StLNC0516	PGSC0003DMG400024788	PGSC0003DMT400063780	sense	genic	0	containing	intronic
MSTRG.900.6	StLNC0517	PGSC0003DMG400010936	PGSC0003DMT400028377	antisense	intergenic	365	convergent	downstream
MSTRG.80.28	StLNC0518	PGSC0003DMG400032169	PGSC0003DMT400081953	antisense	intergenic	43585	divergent	upstream
MSTRG.10729.2	StLNC0519	PGSC0003DMG400010854	PGSC0003DMT400028133	sense	intergenic	525	same_strand	upstream
MSTRG.7308.2	StLNC0520	PGSC0003DMG400012384	PGSC0003DMT400032225	antisense	intergenic	3241	convergent	downstream
MSTRG.145.3	StLNC0521	PGSC0003DMG400032190	PGSC0003DMT400081989	antisense	intergenic	1922	divergent	upstream
MSTRG.3144.2	StLNC0522	PGSC0003DMG400012569	PGSC0003DMT400032735	antisense	intergenic	6266	convergent	downstream
MSTRG.13371.1	StLNC0523	PGSC0003DMG400027760	PGSC0003DMT400071350	antisense	genic	0	overlapping	exonic
MSTRG.27390.2	StLNC0524	PGSC0003DMG400015308	PGSC0003DMT400039562	antisense	intergenic	779	convergent	downstream
MSTRG.27390.3	StLNC0525	PGSC0003DMG400015308	PGSC0003DMT400039562	antisense	intergenic	2028	convergent	downstream
MSTRG.22137.2	StLNC0526	PGSC0003DMG400043463	PGSC0003DMT400093892	sense	intergenic	27788	same_strand	downstream
MSTRG.20067.2	StLNC0527	PGSC0003DMG400005498	PGSC0003DMT400014020	sense	intergenic	29407	same_strand	upstream
MSTRG.9617.1	StLNC0528	PGSC0003DMG403005999	PGSC0003DMT400015386	sense	intergenic	130	same_strand	downstream
MSTRG.4714.1	StLNC0529	PGSC0003DMG400021222	PGSC0003DMT400054679	antisense	genic	0	overlapping	exonic
MSTRG.14509.1	StLNC0530	PGSC0003DMG400044422	PGSC0003DMT400094851	antisense	intergenic	21240	convergent	downstream
MSTRG.9686.2	StLNC0531	PGSC0003DMG401029469	PGSC0003DMT400075792	antisense	genic	0	nested	exonic
MSTRG.351.10	StLNC0532	PGSC0003DMG400010488	PGSC0003DMT400027195	antisense	genic	0	containing	intronic
MSTRG.22745.3	StLNC0533	PGSC0003DMG404006439	PGSC0003DMT400016484	antisense	intergenic	1405	divergent	upstream
MSTRG.27019.19	StLNC0534	PGSC0003DMG400045237	PGSC0003DMT400095666	antisense	intergenic	20498	convergent	downstream
MSTRG.3125.3	StLNC0535	PGSC0003DMG400012575	PGSC0003DMT400032753	antisense	genic	0	overlapping	exonic
MSTRG.24340.3	StLNC0536	PGSC0003DMG400026721	PGSC0003DMT400068723	sense	intergenic	6040	same_strand	upstream
MSTRG.4884.2	StLNC0537	PGSC0003DMG400028451	PGSC0003DMT400073221	sense	intergenic	35796	same_strand	downstream
MSTRG.19846.1	StLNC0538	PGSC0003DMG402007635	PGSC0003DMT400019764	sense	intergenic	9504	same_strand	downstream
MSTRG.25123.5	StLNC0539	PGSC0003DMG400029822	PGSC0003DMT400076678	sense	intergenic	110	same_strand	upstream
MSTRG.3719.2	StLNC0540	PGSC0003DMG400014672	PGSC0003DMT400038054	antisense	intergenic	1749	divergent	upstream
MSTRG.3199.3	StLNC0541	PGSC0003DMG400010678	PGSC0003DMT400027709	antisense	intergenic	6594	divergent	upstream
MSTRG.11305.1	StLNC0542	PGSC0003DMG400006662	PGSC0003DMT400017059	antisense	genic	0	nested	exonic
MSTRG.17005.1	StLNC0543	PGSC0003DMG400030748	PGSC0003DMT400079004	sense	intergenic	2740	same_strand	downstream
MSTRG.9126.3	StLNC0544	PGSC0003DMG403005640	PGSC0003DMT400014381	sense	intergenic	64	same_strand	downstream
MSTRG.26339.1	StLNC0545	PGSC0003DMG400040941	PGSC0003DMT400091370	antisense	intergenic	32728	convergent	downstream
MSTRG.12209.1	StLNC0546	PGSC0003DMG402009997	PGSC0003DMT400025891	antisense	intergenic	115	divergent	upstream
MSTRG.13440.1	StLNC0547	PGSC0003DMG400030273	PGSC0003DMT400077828	antisense	intergenic	1202	convergent	downstream
MSTRG.27019.36	StLNC0548	PGSC0003DMG400019686	PGSC0003DMT400050687	sense	intergenic	503	same_strand	downstream
MSTRG.17051.5	StLNC0549	PGSC0003DMG400006705	PGSC0003DMT400017187	antisense	intergenic	990	convergent	downstream
MSTRG.2616.2	StLNC0550	PGSC0003DMG400024748	PGSC0003DMT400063677	antisense	intergenic	13161	divergent	upstream
MSTRG.1243.45	StLNC0551	PGSC0003DMG400022660	PGSC0003DMT400058344	antisense	intergenic	8209	convergent	downstream
MSTRG.80.39	StLNC0552	PGSC0003DMG400032127	PGSC0003DMT400081823	sense	intergenic	10773	same_strand	upstream
MSTRG.20593.1	StLNC0553	PGSC0003DMG400026268	PGSC0003DMT400067565	sense	intergenic	66188	same_strand	upstream
MSTRG.10210.5	StLNC0554	PGSC0003DMG400027267	PGSC0003DMT400070152	sense	intergenic	3799	same_strand	downstream
MSTRG.22109.1	StLNC0555	PGSC0003DMG400045752	PGSC0003DMT400096181	antisense	intergenic	9332	convergent	downstream
MSTRG.22827.1	StLNC0556	PGSC0003DMG400017187	PGSC0003DMT400044245	antisense	genic	0	overlapping	exonic
MSTRG.25810.1	StLNC0557	PGSC0003DMG400007606	PGSC0003DMT400019683	sense	genic	0	containing	intronic
MSTRG.17504.4	StLNC0558	PGSC0003DMG400012049	PGSC0003DMT400031428	sense	genic	0	containing	intronic
MSTRG.5509.2	StLNC0559	PGSC0003DMG400001514	PGSC0003DMT400003820	antisense	intergenic	232	convergent	downstream
MSTRG.15516.1	StLNC0560	PGSC0003DMG400026142	PGSC0003DMT400067225	antisense	intergenic	5118	convergent	downstream
MSTRG.7752.1	StLNC0561	PGSC0003DMG400014329	PGSC0003DMT400037162	sense	intergenic	24718	same_strand	upstream
MSTRG.5640.4	StLNC0562	PGSC0003DMG400003627	PGSC0003DMT400009331	sense	intergenic	6370	same_strand	upstream
MSTRG.16054.2	StLNC0563	PGSC0003DMG400033029	PGSC0003DMT400083027	antisense	intergenic	362	convergent	downstream
MSTRG.4137.2	StLNC0564	PGSC0003DMG400035389	PGSC0003DMT400085818	sense	intergenic	1268	same_strand	downstream
MSTRG.27518.2	StLNC0565	PGSC0003DMG400038772	PGSC0003DMT400089201	antisense	intergenic	5500	divergent	upstream
MSTRG.16046.3	StLNC0566	PGSC0003DMG400033062	PGSC0003DMT400083120	sense	intergenic	4537	same_strand	downstream
MSTRG.13965.1	StLNC0567	PGSC0003DMG400008445	PGSC0003DMT400021753	sense	intergenic	8065	same_strand	downstream
MSTRG.3102.1	StLNC0568	PGSC0003DMG400012583	PGSC0003DMT400032774	antisense	genic	0	nested	intronic
MSTRG.1602.1	StLNC0569	PGSC0003DMG400006886	PGSC0003DMT400017740	antisense	genic	0	containing	intronic
MSTRG.3102.2	StLNC0570	PGSC0003DMG400012583	PGSC0003DMT400032774	antisense	genic	0	nested	intronic
MSTRG.900.11	StLNC0571	PGSC0003DMG400010936	PGSC0003DMT400028377	antisense	intergenic	1567	convergent	downstream
MSTRG.11704.1	StLNC0572	PGSC0003DMG400004969	PGSC0003DMT400012749	sense	intergenic	4772	same_strand	downstream
MSTRG.17737.2	StLNC0573	PGSC0003DMG400013537	PGSC0003DMT400035206	antisense	genic	0	nested	exonic
MSTRG.3557.4	StLNC0574	PGSC0003DMG400030958	PGSC0003DMT400079507	antisense	intergenic	798	convergent	downstream
MSTRG.14961.1	StLNC0575	PGSC0003DMG400006643	PGSC0003DMT400017004	antisense	intergenic	2553	convergent	downstream
MSTRG.3302.18	StLNC0576	PGSC0003DMG402025764	PGSC0003DMT400066200	sense	intergenic	274	same_strand	upstream
MSTRG.17737.5	StLNC0577	PGSC0003DMG400013537	PGSC0003DMT400035206	antisense	genic	0	nested	exonic
MSTRG.7118.4	StLNC0578	PGSC0003DMG400023088	PGSC0003DMT400059421	sense	intergenic	15211	same_strand	downstream
MSTRG.27351.6	StLNC0579	PGSC0003DMG400015364	PGSC0003DMT400039755	antisense	genic	0	nested	exonic
MSTRG.19425.1	StLNC0580	PGSC0003DMG400015102	PGSC0003DMT400039056	sense	intergenic	10773	same_strand	downstream
MSTRG.29465.2	StLNC0581	PGSC0003DMG400004289	PGSC0003DMT400010951	sense	intergenic	86	same_strand	upstream
MSTRG.7950.1	StLNC0582	PGSC0003DMG400009085	PGSC0003DMT400023465	antisense	intergenic	3715	convergent	downstream
MSTRG.11254.22	StLNC0583	PGSC0003DMG400000779	PGSC0003DMT400002040	antisense	genic	0	overlapping	exonic
MSTRG.29313.7	StLNC0584	PGSC0003DMG400004676	PGSC0003DMT400011910	antisense	genic	0	containing	exonic
MSTRG.10687.1	StLNC0585	PGSC0003DMG400035656	PGSC0003DMT400086085	antisense	intergenic	52663	divergent	upstream
MSTRG.24265.1	StLNC0586	PGSC0003DMG400003406	PGSC0003DMT400008766	antisense	intergenic	401	convergent	downstream
MSTRG.24764.2	StLNC0587	PGSC0003DMG400011084	PGSC0003DMT400028794	sense	intergenic	4513	same_strand	downstream
MSTRG.13364.1	StLNC0588	PGSC0003DMG400005597	PGSC0003DMT400014271	antisense	intergenic	19974	divergent	upstream
MSTRG.22379.6	StLNC0589	PGSC0003DMG400007534	PGSC0003DMT400019487	antisense	intergenic	11721	convergent	downstream
MSTRG.2796.7	StLNC0590	PGSC0003DMG400018242	PGSC0003DMT400046967	sense	intergenic	291	same_strand	downstream
MSTRG.15262.6	StLNC0591	PGSC0003DMG400030782	PGSC0003DMT400079095	antisense	intergenic	792	convergent	downstream
MSTRG.23206.1	StLNC0592	PGSC0003DMG400006580	PGSC0003DMT400016827	antisense	genic	0	containing	intronic
MSTRG.963.1	StLNC0593	PGSC0003DMG400018929	PGSC0003DMT400048710	sense	genic	0	nested	intronic
MSTRG.2753.1	StLNC0594	PGSC0003DMG400002789	PGSC0003DMT400007215	sense	intergenic	1441	same_strand	downstream
MSTRG.10686.5	StLNC0595	PGSC0003DMG400035656	PGSC0003DMT400086085	sense	intergenic	52663	same_strand	upstream
MSTRG.1657.34	StLNC0596	PGSC0003DMG400006795	PGSC0003DMT400017509	sense	intergenic	35682	same_strand	upstream
MSTRG.80.41	StLNC0597	PGSC0003DMG400032127	PGSC0003DMT400081823	sense	intergenic	10767	same_strand	upstream
MSTRG.9445.7	StLNC0598	PGSC0003DMG400009148	PGSC0003DMT400023636	antisense	intergenic	5333	convergent	downstream
MSTRG.789.2	StLNC0599	PGSC0003DMG400036483	PGSC0003DMT400086912	antisense	intergenic	4618	convergent	downstream
MSTRG.21786.1	StLNC0600	PGSC0003DMG400026613	PGSC0003DMT400068437	sense	intergenic	7279	same_strand	upstream
MSTRG.10702.1	StLNC0601	PGSC0003DMG400026817	PGSC0003DMT400068945	sense	intergenic	24553	same_strand	downstream
MSTRG.23245.6	StLNC0602	PGSC0003DMG400021603	PGSC0003DMT400055632	antisense	genic	0	nested	exonic
MSTRG.21844.1	StLNC0603	PGSC0003DMG400030270	PGSC0003DMT400077817	antisense	intergenic	13339	convergent	downstream
MSTRG.24660.3	StLNC0604	PGSC0003DMG400028001	PGSC0003DMT400071965	sense	intergenic	7778	same_strand	upstream
MSTRG.13473.4	StLNC0605	PGSC0003DMG400017891	PGSC0003DMT400046096	sense	intergenic	318	same_strand	upstream
MSTRG.42.1	StLNC0606	PGSC0003DMG400038942	PGSC0003DMT400089371	antisense	intergenic	5562	convergent	downstream
MSTRG.5512.2	StLNC0607	PGSC0003DMG400001565	PGSC0003DMT400003980	antisense	intergenic	12216	convergent	downstream
MSTRG.18357.7	StLNC0608	PGSC0003DMG400017307	PGSC0003DMT400044590	sense	intergenic	2478	same_strand	downstream
MSTRG.17394.1	StLNC0609	PGSC0003DMG400038086	PGSC0003DMT400088515	antisense	genic	0	overlapping	exonic
MSTRG.27025.2	StLNC0610	PGSC0003DMG400019669	PGSC0003DMT400050640	sense	intergenic	1135	same_strand	downstream
MSTRG.17227.1	StLNC0611	PGSC0003DMG402020702	PGSC0003DMT400053351	antisense	intergenic	47570	divergent	upstream
MSTRG.10805.5	StLNC0612	PGSC0003DMG400010575	PGSC0003DMT400027418	sense	intergenic	9050	same_strand	downstream
MSTRG.19000.1	StLNC0613	PGSC0003DMG400008751	PGSC0003DMT400022573	antisense	intergenic	20521	convergent	downstream
MSTRG.810.1	StLNC0614	PGSC0003DMG400006516	PGSC0003DMT400016672	antisense	intergenic	6546	convergent	downstream
MSTRG.11254.39	StLNC0615	PGSC0003DMG400000779	PGSC0003DMT400002040	antisense	genic	0	overlapping	exonic
MSTRG.5795.2	StLNC0616	PGSC0003DMG400026396	PGSC0003DMT400067866	antisense	genic	0	containing	intronic
MSTRG.20603.4	StLNC0617	PGSC0003DMG400004829	PGSC0003DMT400012323	sense	intergenic	71401	same_strand	upstream
MSTRG.909.1	StLNC0618	PGSC0003DMG400035437	PGSC0003DMT400085866	sense	intergenic	11138	same_strand	upstream
MSTRG.24356.1	StLNC0619	PGSC0003DMG400040131	PGSC0003DMT400090560	antisense	genic	0	containing	exonic
MSTRG.17913.1	StLNC0620	PGSC0003DMG400006153	PGSC0003DMT400015748	antisense	intergenic	2324	divergent	upstream
MSTRG.2342.2	StLNC0621	PGSC0003DMG400003290	PGSC0003DMT400008506	sense	intergenic	16838	same_strand	downstream
MSTRG.14702.4	StLNC0622	PGSC0003DMG400020042	PGSC0003DMT400051598	sense	intergenic	3085	same_strand	upstream
MSTRG.16180.1	StLNC0623	PGSC0003DMG400027034	PGSC0003DMT400069542	antisense	intergenic	580	convergent	downstream
MSTRG.11254.27	StLNC0624	PGSC0003DMG400000783	PGSC0003DMT400002054	antisense	genic	0	overlapping	exonic
MSTRG.22209.4	StLNC0625	PGSC0003DMG400037372	PGSC0003DMT400087801	sense	intergenic	4102	same_strand	downstream
MSTRG.22209.5	StLNC0626	PGSC0003DMG400037372	PGSC0003DMT400087801	sense	intergenic	4108	same_strand	downstream
MSTRG.1498.9	StLNC0627	PGSC0003DMG400005200	PGSC0003DMT400013327	sense	intergenic	696	same_strand	downstream
MSTRG.13104.2	StLNC0628	PGSC0003DMG400011978	PGSC0003DMT400031254	sense	intergenic	5646	same_strand	upstream
MSTRG.86.1	StLNC0629	PGSC0003DMG400032127	PGSC0003DMT400081823	sense	intergenic	32963	same_strand	upstream
MSTRG.19427.1	StLNC0630	PGSC0003DMG400015102	PGSC0003DMT400039056	sense	intergenic	5743	same_strand	upstream
MSTRG.11184.3	StLNC0631	PGSC0003DMG400024856	PGSC0003DMT400063951	sense	genic	0	containing	intronic
MSTRG.23245.73	StLNC0632	PGSC0003DMG400021603	PGSC0003DMT400055632	antisense	genic	0	nested	exonic
MSTRG.6227.8	StLNC0633	PGSC0003DMG400001361	PGSC0003DMT400003451	sense	intergenic	54	same_strand	upstream
MSTRG.11157.2	StLNC0634	PGSC0003DMG400002385	PGSC0003DMT400006130	antisense	intergenic	4161	divergent	upstream
MSTRG.21115.1	StLNC0635	PGSC0003DMG400020349	PGSC0003DMT400052422	sense	genic	0	overlapping	intronic
MSTRG.9533.3	StLNC0636	PGSC0003DMG400002830	PGSC0003DMT400007358	antisense	intergenic	4629	divergent	upstream
MSTRG.17258.48	StLNC0637	PGSC0003DMG400009565	PGSC0003DMT400024747	sense	genic	0	containing	intronic
MSTRG.9092.5	StLNC0638	PGSC0003DMG400005660	PGSC0003DMT400014425	sense	intergenic	73	same_strand	downstream
MSTRG.73.2	StLNC0639	PGSC0003DMG400032169	PGSC0003DMT400081953	antisense	intergenic	6139	divergent	upstream
MSTRG.11773.1	StLNC0640	PGSC0003DMG400021540	PGSC0003DMT400055474	antisense	genic	0	containing	intronic
MSTRG.7289.1	StLNC0641	PGSC0003DMG400044371	PGSC0003DMT400094800	sense	intergenic	35009	same_strand	upstream
MSTRG.11413.1	StLNC0642	PGSC0003DMG400027555	PGSC0003DMT400070850	sense	intergenic	887	same_strand	upstream
MSTRG.3199.1	StLNC0643	PGSC0003DMG400010678	PGSC0003DMT400027709	antisense	intergenic	6803	divergent	upstream
MSTRG.10651.5	StLNC0644	PGSC0003DMG400038483	PGSC0003DMT400088912	antisense	intergenic	16262	divergent	upstream
MSTRG.28000.2	StLNC0645	PGSC0003DMG400027873	PGSC0003DMT400071652	antisense	intergenic	13180	convergent	downstream
MSTRG.20941.1	StLNC0646	PGSC0003DMG400012304	PGSC0003DMT400032057	antisense	genic	0	nested	exonic
MSTRG.21791.4	StLNC0647	PGSC0003DMG400026612	PGSC0003DMT400068436	sense	intergenic	14553	same_strand	downstream
MSTRG.27077.1	StLNC0648	PGSC0003DMG400018692	PGSC0003DMT400048108	antisense	genic	0	containing	intronic
MSTRG.15857.1	StLNC0649	PGSC0003DMG400028499	PGSC0003DMT400073331	antisense	genic	0	nested	exonic
MSTRG.28536.4	StLNC0650	PGSC0003DMG402019957	PGSC0003DMT400051382	sense	intergenic	1266	same_strand	downstream
MSTRG.11254.67	StLNC0651	PGSC0003DMG400000783	PGSC0003DMT400002054	antisense	genic	0	nested	exonic
MSTRG.10979.1	StLNC0652	PGSC0003DMG400041680	PGSC0003DMT400092109	sense	intergenic	8158	same_strand	downstream
MSTRG.14609.1	StLNC0653	PGSC0003DMG400024196	PGSC0003DMT400062170	antisense	intergenic	17032	convergent	downstream
MSTRG.14243.2	StLNC0654	PGSC0003DMG401017938	PGSC0003DMT400046210	antisense	intergenic	2293	divergent	upstream
MSTRG.3774.4	StLNC0655	PGSC0003DMG400042313	PGSC0003DMT400092742	antisense	genic	0	containing	intronic
MSTRG.8407.1	StLNC0656	PGSC0003DMG400015171	PGSC0003DMT400039237	antisense	genic	0	overlapping	exonic
MSTRG.4054.7	StLNC0657	PGSC0003DMG400021481	PGSC0003DMT400055341	antisense	intergenic	18430	convergent	downstream
MSTRG.1684.2	StLNC0658	PGSC0003DMG400006876	PGSC0003DMT400017725	antisense	genic	0	overlapping	exonic
MSTRG.24750.1	StLNC0659	PGSC0003DMG400011091	PGSC0003DMT400028807	sense	intergenic	1269	same_strand	upstream
MSTRG.26037.2	StLNC0660	PGSC0003DMG400009239	PGSC0003DMT400023895	sense	intergenic	5034	same_strand	downstream
MSTRG.22051.1	StLNC0661	PGSC0003DMG400041598	PGSC0003DMT400092027	antisense	intergenic	6565	divergent	upstream
MSTRG.22113.2	StLNC0662	PGSC0003DMG400030225	PGSC0003DMT400077689	antisense	genic	0	containing	intronic
MSTRG.16846.3	StLNC0663	PGSC0003DMG401011139	PGSC0003DMT400028935	antisense	intergenic	1340	divergent	upstream
MSTRG.26398.5	StLNC0664	PGSC0003DMG400036515	PGSC0003DMT400086944	antisense	intergenic	95484	convergent	downstream
MSTRG.25080.1	StLNC0665	PGSC0003DMG400023712	PGSC0003DMT400060959	antisense	genic	0	overlapping	exonic
MSTRG.25199.2	StLNC0666	PGSC0003DMG400008150	PGSC0003DMT400021057	sense	intergenic	736	same_strand	upstream
MSTRG.27533.6	StLNC0667	PGSC0003DMG400007899	PGSC0003DMT400020443	antisense	intergenic	1166	convergent	downstream
MSTRG.23360.8	StLNC0668	PGSC0003DMG400014385	PGSC0003DMT400037284	antisense	intergenic	5868	convergent	downstream
MSTRG.14018.1	StLNC0669	PGSC0003DMG400023524	PGSC0003DMT400060473	antisense	intergenic	1979	divergent	upstream
MSTRG.17258.41	StLNC0670	PGSC0003DMG400009565	PGSC0003DMT400024747	sense	genic	0	containing	intronic
MSTRG.21682.1	StLNC0671	PGSC0003DMG400020974	PGSC0003DMT400054079	sense	intergenic	1009	same_strand	upstream
MSTRG.10034.1	StLNC0672	PGSC0003DMG400006342	PGSC0003DMT400016230	sense	intergenic	3967	same_strand	upstream
MSTRG.949.1	StLNC0673	PGSC0003DMG400035510	PGSC0003DMT400085939	sense	intergenic	41741	same_strand	downstream
MSTRG.7531.1	StLNC0674	PGSC0003DMG402031302	PGSC0003DMT400080386	antisense	genic	0	overlapping	exonic
MSTRG.97.1	StLNC0675	PGSC0003DMG400032217	PGSC0003DMT400082038	antisense	genic	0	containing	intronic
MSTRG.26522.1	StLNC0676	PGSC0003DMG400022871	PGSC0003DMT400058871	antisense	intergenic	11979	convergent	downstream
MSTRG.11181.2	StLNC0677	PGSC0003DMG400024837	PGSC0003DMT400063901	antisense	intergenic	724	divergent	upstream
MSTRG.21712.1	StLNC0678	PGSC0003DMG402006272	PGSC0003DMT400016046	sense	intergenic	4443	same_strand	upstream
MSTRG.80.25	StLNC0679	PGSC0003DMG400032169	PGSC0003DMT400081953	antisense	intergenic	21817	divergent	upstream
MSTRG.26351.2	StLNC0680	PGSC0003DMG400019765	PGSC0003DMT400050887	antisense	genic	0	overlapping	exonic
MSTRG.2939.1	StLNC0681	PGSC0003DMG400024917	PGSC0003DMT400064124	antisense	intergenic	1098	divergent	upstream
MSTRG.4012.1	StLNC0682	PGSC0003DMG400012665	PGSC0003DMT400032972	sense	intergenic	5692	same_strand	upstream
MSTRG.27013.1	StLNC0683	PGSC0003DMG400019662	PGSC0003DMT400050589	antisense	intergenic	2890	divergent	upstream
MSTRG.29313.8	StLNC0684	PGSC0003DMG400004676	PGSC0003DMT400011910	antisense	genic	0	containing	exonic
MSTRG.24117.7	StLNC0685	PGSC0003DMG400043806	PGSC0003DMT400094235	sense	intergenic	54370	same_strand	upstream
MSTRG.13333.1	StLNC0686	PGSC0003DMG400037101	PGSC0003DMT400087530	sense	intergenic	3868	same_strand	upstream
MSTRG.14845.1	StLNC0687	PGSC0003DMG400023962	PGSC0003DMT400061560	antisense	intergenic	8499	convergent	downstream
MSTRG.28296.16	StLNC0688	PGSC0003DMG400021934	PGSC0003DMT400056456	sense	intergenic	30823	same_strand	downstream
MSTRG.19915.1	StLNC0689	PGSC0003DMG400029085	PGSC0003DMT400074804	antisense	genic	0	overlapping	exonic
MSTRG.19975.3	StLNC0690	PGSC0003DMG400037004	PGSC0003DMT400087433	antisense	intergenic	4358	convergent	downstream
MSTRG.27168.1	StLNC0691	PGSC0003DMG400027386	PGSC0003DMT400070441	antisense	genic	0	containing	intronic
MSTRG.23245.54	StLNC0692	PGSC0003DMG400021603	PGSC0003DMT400055632	antisense	genic	0	nested	exonic
MSTRG.22525.1	StLNC0693	PGSC0003DMG400016849	PGSC0003DMT400043405	antisense	intergenic	14973	convergent	downstream
MSTRG.12836.3	StLNC0694	PGSC0003DMG400041867	PGSC0003DMT400092296	sense	intergenic	3376	same_strand	downstream
MSTRG.13153.3	StLNC0695	PGSC0003DMG400038058	PGSC0003DMT400088487	antisense	intergenic	21024	divergent	upstream
MSTRG.28307.3	StLNC0696	PGSC0003DMG400001240	PGSC0003DMT400003129	antisense	genic	0	containing	intronic
MSTRG.12711.1	StLNC0697	PGSC0003DMG400025547	PGSC0003DMT400065674	antisense	genic	0	overlapping	exonic
MSTRG.11786.2	StLNC0698	PGSC0003DMG400003309	PGSC0003DMT400008558	antisense	intergenic	6696	convergent	downstream
MSTRG.1549.1	StLNC0699	PGSC0003DMG400000840	PGSC0003DMT400002192	antisense	intergenic	9407	divergent	upstream
MSTRG.16725.1	StLNC0700	PGSC0003DMG400020122	PGSC0003DMT400051852	antisense	intergenic	1367	divergent	upstream
MSTRG.28296.31	StLNC0701	PGSC0003DMG400014999	PGSC0003DMT400038813	antisense	intergenic	78103	convergent	downstream
MSTRG.6694.1	StLNC0702	PGSC0003DMG400012820	PGSC0003DMT400033373	sense	intergenic	13186	same_strand	downstream
MSTRG.23790.3	StLNC0703	PGSC0003DMG400023097	PGSC0003DMT400059447	antisense	intergenic	153	divergent	upstream
MSTRG.13065.7	StLNC0704	PGSC0003DMG400016975	PGSC0003DMT400043706	antisense	intergenic	6930	divergent	upstream
MSTRG.13809.1	StLNC0705	PGSC0003DMG400027219	PGSC0003DMT400069999	sense	genic	0	containing	intronic
MSTRG.1657.21	StLNC0706	PGSC0003DMG400006794	PGSC0003DMT400017493	sense	intergenic	7491	same_strand	downstream
MSTRG.23713.1	StLNC0707	PGSC0003DMG400041568	PGSC0003DMT400091997	sense	intergenic	2729	same_strand	downstream
MSTRG.22710.2	StLNC0708	PGSC0003DMG400032245	PGSC0003DMT400082070	antisense	intergenic	5051	convergent	downstream
MSTRG.12370.1	StLNC0709	PGSC0003DMG400005585	PGSC0003DMT400014243	antisense	genic	0	overlapping	exonic
MSTRG.24936.1	StLNC0710	PGSC0003DMG400028153	PGSC0003DMT400072344	antisense	genic	0	containing	exonic
MSTRG.24699.1	StLNC0711	PGSC0003DMG400034883	PGSC0003DMT400085312	antisense	intergenic	4970	convergent	downstream
MSTRG.8957.1	StLNC0712	PGSC0003DMG400014149	PGSC0003DMT400036691	sense	intergenic	1093	same_strand	upstream
MSTRG.23717.1	StLNC0713	PGSC0003DMG400019396	PGSC0003DMT400049910	antisense	intergenic	12316	divergent	upstream
MSTRG.12209.5	StLNC0714	PGSC0003DMG402009997	PGSC0003DMT400025891	antisense	intergenic	153	divergent	upstream
MSTRG.16026.1	StLNC0715	PGSC0003DMG401033036	PGSC0003DMT400083052	antisense	genic	0	containing	exonic
MSTRG.19120.1	StLNC0716	PGSC0003DMG401024140	PGSC0003DMT400062026	antisense	genic	0	overlapping	exonic
MSTRG.29291.1	StLNC0717	PGSC0003DMG400047043	PGSC0003DMT400097472	sense	intergenic	4694	same_strand	upstream
MSTRG.27533.4	StLNC0718	PGSC0003DMG400007899	PGSC0003DMT400020443	antisense	intergenic	1162	convergent	downstream
MSTRG.19456.2	StLNC0719	PGSC0003DMG400017885	PGSC0003DMT400046087	antisense	intergenic	7972	divergent	upstream
MSTRG.1869.2	StLNC0720	PGSC0003DMG400001681	PGSC0003DMT400004222	sense	genic	0	containing	intronic
MSTRG.11254.18	StLNC0721	PGSC0003DMG400000783	PGSC0003DMT400002054	antisense	genic	0	overlapping	exonic
MSTRG.27533.7	StLNC0722	PGSC0003DMG400007899	PGSC0003DMT400020443	antisense	intergenic	1234	convergent	downstream
MSTRG.17906.1	StLNC0723	PGSC0003DMG400006128	PGSC0003DMT400015684	sense	intergenic	169	same_strand	downstream
MSTRG.28215.1	StLNC0724	PGSC0003DMG400003420	PGSC0003DMT400008804	sense	genic	0	containing	intronic
MSTRG.6039.3	StLNC0725	PGSC0003DMG400004011	PGSC0003DMT400010253	sense	intergenic	15353	same_strand	upstream
MSTRG.6539.1	StLNC0726	PGSC0003DMG400020193	PGSC0003DMT400052026	sense	intergenic	27039	same_strand	upstream
MSTRG.11357.7	StLNC0727	PGSC0003DMG400031145	PGSC0003DMT400079988	sense	intergenic	2179	same_strand	upstream
MSTRG.21864.1	StLNC0728	PGSC0003DMG400026792	PGSC0003DMT400068892	antisense	intergenic	3252	divergent	upstream
MSTRG.15864.7	StLNC0729	PGSC0003DMG400028494	PGSC0003DMT400073322	antisense	intergenic	1512	convergent	downstream
MSTRG.2573.1	StLNC0730	PGSC0003DMG400018994	PGSC0003DMT400048879	sense	intergenic	53988	same_strand	downstream
MSTRG.13603.1	StLNC0731	PGSC0003DMG400017990	PGSC0003DMT400046351	sense	intergenic	1516	same_strand	downstream
MSTRG.11407.1	StLNC0732	PGSC0003DMG400027559	PGSC0003DMT400070872	antisense	genic	0	overlapping	exonic
MSTRG.14839.1	StLNC0733	PGSC0003DMG400023939	PGSC0003DMT400061511	sense	intergenic	2950	same_strand	downstream
MSTRG.15302.1	StLNC0734	PGSC0003DMG400009831	PGSC0003DMT400025466	antisense	intergenic	19443	convergent	downstream
MSTRG.27518.5	StLNC0735	PGSC0003DMG400038772	PGSC0003DMT400089201	antisense	intergenic	5464	divergent	upstream
MSTRG.24097.1	StLNC0736	PGSC0003DMG400010273	PGSC0003DMT400026596	sense	intergenic	2518	same_strand	upstream
MSTRG.7147.1	StLNC0737	PGSC0003DMG400009763	PGSC0003DMT400025276	antisense	intergenic	14107	convergent	downstream
MSTRG.80.23	StLNC0738	PGSC0003DMG400032169	PGSC0003DMT400081953	antisense	intergenic	21719	divergent	upstream
MSTRG.19559.2	StLNC0739	PGSC0003DMG400029898	PGSC0003DMT400076868	sense	intergenic	1668	same_strand	downstream
MSTRG.6099.12	StLNC0740	PGSC0003DMG400010102	PGSC0003DMT400026215	sense	genic	0	containing	intronic
MSTRG.5792.3	StLNC0741	PGSC0003DMG400012667	PGSC0003DMT400032979	antisense	intergenic	876	divergent	upstream
MSTRG.24579.5	StLNC0742	PGSC0003DMG400041702	PGSC0003DMT400092131	antisense	intergenic	32484	divergent	upstream
MSTRG.9422.1	StLNC0743	PGSC0003DMG400037583	PGSC0003DMT400088012	antisense	genic	0	overlapping	exonic
MSTRG.3774.6	StLNC0744	PGSC0003DMG400042313	PGSC0003DMT400092742	antisense	genic	0	containing	intronic
MSTRG.923.4	StLNC0745	PGSC0003DMG400015973	PGSC0003DMT400041261	sense	genic	0	containing	intronic
MSTRG.13628.1	StLNC0746	PGSC0003DMG400007009	PGSC0003DMT400018045	antisense	genic	0	overlapping	exonic
MSTRG.24580.2	StLNC0747	PGSC0003DMG400041702	PGSC0003DMT400092131	sense	intergenic	33124	same_strand	upstream
MSTRG.10860.1	StLNC0748	PGSC0003DMG400001883	PGSC0003DMT400004751	antisense	intergenic	20256	convergent	downstream
MSTRG.11646.1	StLNC0749	PGSC0003DMG400009349	PGSC0003DMT400024193	antisense	genic	0	overlapping	exonic
MSTRG.23172.1	StLNC0750	PGSC0003DMG400016623	PGSC0003DMT400042851	antisense	intergenic	10441	divergent	upstream
MSTRG.3719.4	StLNC0751	PGSC0003DMG400014672	PGSC0003DMT400038054	antisense	intergenic	1852	divergent	upstream
MSTRG.818.4	StLNC0752	PGSC0003DMG400044969	PGSC0003DMT400095398	antisense	intergenic	26500	divergent	upstream
MSTRG.17620.1	StLNC0753	PGSC0003DMG400016079	PGSC0003DMT400041482	sense	intergenic	47694	same_strand	upstream
MSTRG.28296.13	StLNC0754	PGSC0003DMG400021934	PGSC0003DMT400056456	sense	intergenic	30823	same_strand	downstream
MSTRG.12235.4	StLNC0755	PGSC0003DMG400025665	PGSC0003DMT400065940	antisense	intergenic	13109	convergent	downstream
MSTRG.14494.1	StLNC0756	PGSC0003DMG400004407	PGSC0003DMT400011251	antisense	intergenic	3791	convergent	downstream
MSTRG.28966.1	StLNC0757	PGSC0003DMG400042845	PGSC0003DMT400093274	sense	intergenic	12900	same_strand	downstream
MSTRG.23855.2	StLNC0758	PGSC0003DMG400012086	PGSC0003DMT400031520	antisense	genic	0	containing	intronic
MSTRG.22917.1	StLNC0759	PGSC0003DMG400017202	PGSC0003DMT400044301	sense	intergenic	8148	same_strand	downstream
MSTRG.22828.3	StLNC0760	PGSC0003DMG400017190	PGSC0003DMT400044259	sense	intergenic	1416	same_strand	upstream
MSTRG.780.1	StLNC0761	PGSC0003DMG400035131	PGSC0003DMT400085560	antisense	intergenic	10218	convergent	downstream
MSTRG.7523.1	StLNC0762	PGSC0003DMG400008325	PGSC0003DMT400021452	antisense	genic	0	overlapping	exonic
MSTRG.6099.1	StLNC0763	PGSC0003DMG400010102	PGSC0003DMT400026215	sense	genic	0	containing	intronic
MSTRG.28272.1	StLNC0764	PGSC0003DMG400018822	PGSC0003DMT400048460	sense	intergenic	21128	same_strand	upstream
MSTRG.17258.23	StLNC0765	PGSC0003DMG400009565	PGSC0003DMT400024747	sense	genic	0	containing	intronic
MSTRG.4837.1	StLNC0766	PGSC0003DMG400003097	PGSC0003DMT400008016	sense	intergenic	625	same_strand	upstream
MSTRG.1213.2	StLNC0767	PGSC0003DMG400011334	PGSC0003DMT400029476	antisense	intergenic	4707	convergent	downstream
MSTRG.5257.8	StLNC0768	PGSC0003DMG400021734	PGSC0003DMT400055954	antisense	genic	0	containing	intronic
MSTRG.7247.1	StLNC0769	PGSC0003DMG400019788	PGSC0003DMT400050960	sense	intergenic	60	same_strand	downstream
MSTRG.3777.2	StLNC0770	PGSC0003DMG400035436	PGSC0003DMT400085865	antisense	intergenic	41076	convergent	downstream
MSTRG.8273.1	StLNC0771	PGSC0003DMG400010144	PGSC0003DMT400026286	antisense	intergenic	2	convergent	downstream
MSTRG.2342.1	StLNC0772	PGSC0003DMG400003290	PGSC0003DMT400008506	sense	intergenic	21586	same_strand	downstream
MSTRG.17524.1	StLNC0773	PGSC0003DMG400019106	PGSC0003DMT400049159	sense	intergenic	14195	same_strand	upstream
MSTRG.9258.1	StLNC0774	PGSC0003DMG403002548	PGSC0003DMT400006545	antisense	genic	0	containing	intronic
MSTRG.12365.1	StLNC0775	PGSC0003DMG400005586	PGSC0003DMT400014246	sense	intergenic	4403	same_strand	downstream
MSTRG.7439.1	StLNC0776	PGSC0003DMG400011934	PGSC0003DMT400031166	sense	intergenic	8740	same_strand	upstream
MSTRG.6865.4	StLNC0777	PGSC0003DMG400044751	PGSC0003DMT400095180	antisense	genic	0	containing	intronic
MSTRG.25900.1	StLNC0778	PGSC0003DMG400028697	PGSC0003DMT400073850	sense	intergenic	6661	same_strand	upstream
MSTRG.1813.1	StLNC0779	PGSC0003DMG400001804	PGSC0003DMT400004540	antisense	genic	0	containing	intronic
MSTRG.18900.1	StLNC0780	PGSC0003DMG400038517	PGSC0003DMT400088946	sense	intergenic	3660	same_strand	downstream
MSTRG.14402.7	StLNC0781	PGSC0003DMG400020552	PGSC0003DMT400052961	sense	genic	0	containing	intronic
MSTRG.23245.70	StLNC0782	PGSC0003DMG400021603	PGSC0003DMT400055632	antisense	genic	0	nested	exonic
MSTRG.28296.1	StLNC0783	PGSC0003DMG400021934	PGSC0003DMT400056456	sense	intergenic	28445	same_strand	downstream
MSTRG.15093.1	StLNC0784	PGSC0003DMG400028891	PGSC0003DMT400074329	antisense	genic	0	overlapping	exonic
MSTRG.19541.2	StLNC0785	PGSC0003DMG400000969	PGSC0003DMT400002543	sense	intergenic	994	same_strand	downstream
MSTRG.1948.2	StLNC0786	PGSC0003DMG400025992	PGSC0003DMT400066855	antisense	genic	0	overlapping	intronic
MSTRG.17359.3	StLNC0787	PGSC0003DMG400018910	PGSC0003DMT400048676	antisense	intergenic	28130	divergent	upstream
MSTRG.20978.1	StLNC0788	PGSC0003DMG400012149	PGSC0003DMT400031677	antisense	intergenic	3160	divergent	upstream
MSTRG.10246.3	StLNC0789	PGSC0003DMG400027274	PGSC0003DMT400070167	sense	genic	0	containing	intronic
MSTRG.3027.2	StLNC0790	PGSC0003DMG400023776	PGSC0003DMT400061112	antisense	intergenic	2727	divergent	upstream
MSTRG.13289.1	StLNC0791	PGSC0003DMG402015901	PGSC0003DMT400041086	antisense	intergenic	5061	convergent	downstream
MSTRG.4844.1	StLNC0792	PGSC0003DMG400007231	PGSC0003DMT400018670	antisense	intergenic	3315	convergent	downstream
MSTRG.11279.4	StLNC0793	PGSC0003DMG400008615	PGSC0003DMT400022199	sense	intergenic	911	same_strand	downstream
MSTRG.2787.1	StLNC0794	PGSC0003DMG400018286	PGSC0003DMT400047124	antisense	intergenic	6725	divergent	upstream
MSTRG.29282.6	StLNC0795	PGSC0003DMG400004667	PGSC0003DMT400011891	sense	intergenic	12101	same_strand	downstream
MSTRG.28296.50	StLNC0796	PGSC0003DMG400014999	PGSC0003DMT400038813	antisense	intergenic	91237	convergent	downstream
MSTRG.7158.8	StLNC0797	PGSC0003DMG400037014	PGSC0003DMT400087443	antisense	genic	0	containing	intronic
MSTRG.1489.1	StLNC0798	PGSC0003DMG400005219	PGSC0003DMT400013381	sense	intergenic	3607	same_strand	downstream
MSTRG.3721.1	StLNC0799	PGSC0003DMG402014659	PGSC0003DMT400038004	antisense	genic	0	overlapping	exonic
MSTRG.6610.1	StLNC0800	PGSC0003DMG400013411	PGSC0003DMT400034892	antisense	genic	0	overlapping	exonic
MSTRG.12009.1	StLNC0801	PGSC0003DMG400003739	PGSC0003DMT400009587	sense	intergenic	123	same_strand	downstream
MSTRG.28186.1	StLNC0802	PGSC0003DMG400019594	PGSC0003DMT400050408	antisense	intergenic	4074	divergent	upstream
MSTRG.29227.2	StLNC0803	PGSC0003DMG400045101	PGSC0003DMT400095530	sense	genic	0	containing	intronic
MSTRG.19975.4	StLNC0804	PGSC0003DMG400037004	PGSC0003DMT400087433	antisense	intergenic	4292	convergent	downstream
MSTRG.20635.1	StLNC0805	PGSC0003DMG400004810	PGSC0003DMT400012257	antisense	intergenic	358	convergent	downstream
MSTRG.21873.1	StLNC0806	PGSC0003DMG400042811	PGSC0003DMT400093240	sense	intergenic	2230	same_strand	upstream
MSTRG.19703.1	StLNC0807	PGSC0003DMG400021745	PGSC0003DMT400055978	antisense	intergenic	18703	convergent	downstream
MSTRG.28743.1	StLNC0808	PGSC0003DMG400028867	PGSC0003DMT400074277	sense	intergenic	9694	same_strand	upstream
MSTRG.16980.1	StLNC0809	PGSC0003DMG402018748	PGSC0003DMT400048258	antisense	intergenic	4895	convergent	downstream
MSTRG.13797.1	StLNC0810	PGSC0003DMG400011641	PGSC0003DMT400030403	sense	intergenic	4771	same_strand	upstream
MSTRG.1657.10	StLNC0811	PGSC0003DMG400006794	PGSC0003DMT400017493	sense	genic	0	containing	intronic
MSTRG.20707.1	StLNC0812	PGSC0003DMG401028052	PGSC0003DMT400072097	antisense	genic	0	overlapping	exonic
MSTRG.19285.3	StLNC0813	PGSC0003DMG400044583	PGSC0003DMT400095012	antisense	intergenic	7149	divergent	upstream
MSTRG.10488.1	StLNC0814	PGSC0003DMG400037492	PGSC0003DMT400087921	sense	intergenic	36433	same_strand	upstream
MSTRG.11254.16	StLNC0815	PGSC0003DMG400000776	PGSC0003DMT400002035	antisense	genic	0	nested	exonic
MSTRG.25813.1	StLNC0816	PGSC0003DMG400001989	PGSC0003DMT400005032	sense	genic	0	containing	intronic
MSTRG.23156.1	StLNC0817	PGSC0003DMG400017926	PGSC0003DMT400046189	sense	intergenic	4413	same_strand	upstream
MSTRG.12365.2	StLNC0818	PGSC0003DMG400005586	PGSC0003DMT400014246	sense	intergenic	4527	same_strand	downstream
MSTRG.23913.6	StLNC0819	PGSC0003DMG400018983	PGSC0003DMT400048853	antisense	intergenic	575	convergent	downstream
MSTRG.11124.1	StLNC0820	PGSC0003DMG400009839	PGSC0003DMT400025486	antisense	genic	0	overlapping	exonic
MSTRG.25773.1	StLNC0821	PGSC0003DMG400023975	PGSC0003DMT400061587	sense	intergenic	3110	same_strand	downstream
MSTRG.17508.1	StLNC0822	PGSC0003DMG400006683	PGSC0003DMT400017123	sense	genic	0	nested	intronic
MSTRG.18059.25	StLNC0823	PGSC0003DMG400035134	PGSC0003DMT400085563	antisense	intergenic	7705	convergent	downstream
MSTRG.14638.5	StLNC0824	PGSC0003DMG400045703	PGSC0003DMT400096132	antisense	intergenic	75190	convergent	downstream
MSTRG.11739.1	StLNC0825	PGSC0003DMG400010622	PGSC0003DMT400027553	antisense	intergenic	2517	convergent	downstream
MSTRG.5404.2	StLNC0826	PGSC0003DMG400025598	PGSC0003DMT400065768	sense	intergenic	3281	same_strand	downstream
MSTRG.11028.1	StLNC0827	PGSC0003DMG400044220	PGSC0003DMT400094649	sense	intergenic	22301	same_strand	downstream
MSTRG.26200.1	StLNC0828	PGSC0003DMG400013935	PGSC0003DMT400036205	sense	intergenic	456	same_strand	upstream
MSTRG.3125.1	StLNC0829	PGSC0003DMG400012575	PGSC0003DMT400032753	antisense	genic	0	overlapping	exonic
MSTRG.29313.11	StLNC0830	PGSC0003DMG400004677	PGSC0003DMT400011911	antisense	genic	0	overlapping	exonic
MSTRG.9170.5	StLNC0831	PGSC0003DMG401005707	PGSC0003DMT400014587	sense	intergenic	4685	same_strand	downstream
MSTRG.7747.5	StLNC0832	PGSC0003DMG400014329	PGSC0003DMT400037162	sense	genic	0	containing	intronic
MSTRG.22113.6	StLNC0833	PGSC0003DMG400030225	PGSC0003DMT400077689	antisense	intergenic	3640	convergent	downstream
MSTRG.27073.1	StLNC0834	PGSC0003DMG400018591	PGSC0003DMT400047836	antisense	genic	0	overlapping	exonic
MSTRG.23216.4	StLNC0835	PGSC0003DMG400011904	PGSC0003DMT400031072	antisense	genic	0	nested	intronic
MSTRG.28303.1	StLNC0836	PGSC0003DMG400015000	PGSC0003DMT400038816	antisense	genic	0	overlapping	exonic
MSTRG.13123.1	StLNC0837	PGSC0003DMG400017461	PGSC0003DMT400045033	antisense	intergenic	16169	divergent	upstream
MSTRG.5264.1	StLNC0838	PGSC0003DMG400021734	PGSC0003DMT400055954	sense	intergenic	29030	same_strand	downstream
MSTRG.15012.4	StLNC0839	PGSC0003DMG400021581	PGSC0003DMT400055564	antisense	intergenic	1086	divergent	upstream
MSTRG.3127.1	StLNC0840	PGSC0003DMG400012544	PGSC0003DMT400032656	sense	intergenic	226	same_strand	downstream
MSTRG.20484.13	StLNC0841	PGSC0003DMG401024222	PGSC0003DMT400062254	sense	genic	0	containing	intronic
MSTRG.7090.1	StLNC0842	PGSC0003DMG400044276	PGSC0003DMT400094705	antisense	intergenic	6468	divergent	upstream
MSTRG.10444.2	StLNC0843	PGSC0003DMG400027922	PGSC0003DMT400071781	sense	intergenic	110	same_strand	upstream
MSTRG.12365.6	StLNC0844	PGSC0003DMG400005586	PGSC0003DMT400014246	sense	intergenic	4546	same_strand	downstream
MSTRG.10196.7	StLNC0845	PGSC0003DMG400019731	PGSC0003DMT400050795	sense	genic	0	overlapping	intronic
MSTRG.27533.2	StLNC0846	PGSC0003DMG400007899	PGSC0003DMT400020443	antisense	intergenic	1157	convergent	downstream
MSTRG.8224.1	StLNC0847	PGSC0003DMG400037684	PGSC0003DMT400088113	sense	intergenic	7401	same_strand	upstream
MSTRG.28351.1	StLNC0848	PGSC0003DMG400042892	PGSC0003DMT400093321	sense	intergenic	49767	same_strand	downstream
MSTRG.23245.36	StLNC0849	PGSC0003DMG400021603	PGSC0003DMT400055632	antisense	genic	0	nested	exonic
MSTRG.1534.2	StLNC0850	PGSC0003DMG400000834	PGSC0003DMT400002180	sense	genic	0	containing	intronic
MSTRG.29412.1	StLNC0851	PGSC0003DMG400004651	PGSC0003DMT400011846	antisense	genic	0	nested	intronic
MSTRG.4060.2	StLNC0852	PGSC0003DMG400017870	PGSC0003DMT400046054	antisense	intergenic	6037	convergent	downstream
MSTRG.29313.24	StLNC0853	PGSC0003DMG400004677	PGSC0003DMT400011911	antisense	genic	0	overlapping	exonic
MSTRG.27390.1	StLNC0854	PGSC0003DMG400015308	PGSC0003DMT400039562	antisense	intergenic	3262	convergent	downstream
MSTRG.3698.3	StLNC0855	PGSC0003DMG400018631	PGSC0003DMT400047936	antisense	genic	0	overlapping	exonic
MSTRG.21810.2	StLNC0856	PGSC0003DMG400013062	PGSC0003DMT400033973	antisense	genic	0	overlapping	exonic
MSTRG.27078.3	StLNC0857	PGSC0003DMG400018692	PGSC0003DMT400048108	antisense	genic	0	overlapping	exonic
MSTRG.900.8	StLNC0858	PGSC0003DMG400010936	PGSC0003DMT400028377	antisense	intergenic	1566	convergent	downstream
MSTRG.23464.2	StLNC0859	PGSC0003DMG400021268	PGSC0003DMT400054796	antisense	intergenic	3656	divergent	upstream
MSTRG.29319.2	StLNC0860	PGSC0003DMG400004593	PGSC0003DMT400011693	sense	intergenic	9997	same_strand	upstream
MSTRG.13488.1	StLNC0861	PGSC0003DMG400043922	PGSC0003DMT400094351	antisense	intergenic	9333	divergent	upstream
MSTRG.1913.4	StLNC0862	PGSC0003DMG401031172	PGSC0003DMT400080052	sense	intergenic	913	same_strand	upstream
MSTRG.10475.5	StLNC0863	PGSC0003DMG400040032	PGSC0003DMT400090461	antisense	intergenic	21643	divergent	upstream
MSTRG.18570.1	StLNC0864	PGSC0003DMG400019284	PGSC0003DMT400049643	sense	intergenic	2998	same_strand	upstream
MSTRG.10252.1	StLNC0865	PGSC0003DMG400027306	PGSC0003DMT400070235	sense	intergenic	20800	same_strand	downstream
MSTRG.29198.2	StLNC0866	PGSC0003DMG400029352	PGSC0003DMT400075471	sense	genic	0	containing	intronic
MSTRG.21166.1	StLNC0867	PGSC0003DMG400002168	PGSC0003DMT400005546	antisense	genic	0	overlapping	exonic
MSTRG.26078.1	StLNC0868	PGSC0003DMG400027800	PGSC0003DMT400071453	sense	intergenic	22033	same_strand	upstream
MSTRG.12147.11	StLNC0869	PGSC0003DMG400009893	PGSC0003DMT400025613	sense	intergenic	463	same_strand	upstream
MSTRG.19006.1	StLNC0870	PGSC0003DMG400014104	PGSC0003DMT400036586	antisense	genic	0	containing	exonic
MSTRG.10183.1	StLNC0871	PGSC0003DMG400019748	PGSC0003DMT400050843	antisense	intergenic	9880	divergent	upstream
MSTRG.6227.7	StLNC0872	PGSC0003DMG400001361	PGSC0003DMT400003451	sense	intergenic	40	same_strand	upstream
MSTRG.9382.1	StLNC0873	PGSC0003DMG400002488	PGSC0003DMT400006368	antisense	intergenic	2683	convergent	downstream
MSTRG.3989.6	StLNC0874	PGSC0003DMG400041586	PGSC0003DMT400092015	sense	intergenic	9829	same_strand	upstream
MSTRG.27367.16	StLNC0875	PGSC0003DMG400015350	PGSC0003DMT400039717	sense	intergenic	1978	same_strand	upstream
MSTRG.9170.3	StLNC0876	PGSC0003DMG401005707	PGSC0003DMT400014587	sense	intergenic	3328	same_strand	downstream
MSTRG.19714.2	StLNC0877	PGSC0003DMG400021749	PGSC0003DMT400055991	sense	intergenic	6343	same_strand	downstream
MSTRG.15773.1	StLNC0878	PGSC0003DMG400016526	PGSC0003DMT400042611	antisense	genic	0	overlapping	exonic
MSTRG.28296.5	StLNC0879	PGSC0003DMG400021934	PGSC0003DMT400056456	sense	intergenic	28846	same_strand	downstream
MSTRG.27209.1	StLNC0880	PGSC0003DMG400030240	PGSC0003DMT400077738	sense	intergenic	2020	same_strand	downstream
MSTRG.16054.1	StLNC0881	PGSC0003DMG400033029	PGSC0003DMT400083027	antisense	genic	0	overlapping	exonic
MSTRG.11254.20	StLNC0882	PGSC0003DMG400000782	PGSC0003DMT400002049	antisense	genic	0	overlapping	exonic
MSTRG.24931.1	StLNC0883	PGSC0003DMG402028242	PGSC0003DMT400072577	antisense	intergenic	6070	convergent	downstream
MSTRG.11111.2	StLNC0884	PGSC0003DMG400034548	PGSC0003DMT400084977	antisense	intergenic	1420	convergent	downstream
MSTRG.25719.2	StLNC0885	PGSC0003DMG400040684	PGSC0003DMT400091113	antisense	intergenic	1024	convergent	downstream
MSTRG.2516.8	StLNC0886	PGSC0003DMG403028564	PGSC0003DMT400073525	sense	intergenic	4303	same_strand	downstream
MSTRG.5798.2	StLNC0887	PGSC0003DMG400037504	PGSC0003DMT400087933	antisense	intergenic	5728	divergent	upstream
MSTRG.104.2	StLNC0888	PGSC0003DMG400032130	PGSC0003DMT400081830	antisense	intergenic	18724	divergent	upstream
MSTRG.18822.3	StLNC0889	PGSC0003DMG400022138	PGSC0003DMT400056930	sense	genic	0	overlapping	intronic
MSTRG.16276.1	StLNC0890	PGSC0003DMG403005911	PGSC0003DMT400015122	antisense	intergenic	5256	convergent	downstream
MSTRG.3774.2	StLNC0891	PGSC0003DMG400042313	PGSC0003DMT400092742	antisense	genic	0	containing	intronic
MSTRG.23991.3	StLNC0892	PGSC0003DMG400017689	PGSC0003DMT400045604	antisense	intergenic	75476	divergent	upstream
MSTRG.29317.115	StLNC0893	PGSC0003DMG400004593	PGSC0003DMT400011693	antisense	intergenic	4313	divergent	upstream
MSTRG.27024.4	StLNC0894	PGSC0003DMG400019667	PGSC0003DMT400050619	sense	intergenic	6105	same_strand	upstream
MSTRG.23245.83	StLNC0895	PGSC0003DMG400021603	PGSC0003DMT400055632	antisense	genic	0	nested	exonic
MSTRG.20506.1	StLNC0896	PGSC0003DMG400001858	PGSC0003DMT400004695	sense	intergenic	16853	same_strand	downstream
MSTRG.9699.1	StLNC0897	PGSC0003DMG400029512	PGSC0003DMT400075899	antisense	genic	0	overlapping	intronic
MSTRG.3483.9	StLNC0898	PGSC0003DMG400025186	PGSC0003DMT400064863	antisense	intergenic	271	convergent	downstream
MSTRG.3483.13	StLNC0899	PGSC0003DMG400025186	PGSC0003DMT400064863	antisense	intergenic	365	convergent	downstream
MSTRG.18381.1	StLNC0900	PGSC0003DMG400031101	PGSC0003DMT400079856	antisense	genic	0	nested	exonic
MSTRG.80.19	StLNC0901	PGSC0003DMG400032169	PGSC0003DMT400081953	antisense	intergenic	20880	divergent	upstream
MSTRG.18041.3	StLNC0902	PGSC0003DMG400025492	PGSC0003DMT400065518	antisense	intergenic	7525	divergent	upstream
MSTRG.9126.2	StLNC0903	PGSC0003DMG403005640	PGSC0003DMT400014381	sense	intergenic	99	same_strand	downstream
MSTRG.28981.3	StLNC0904	PGSC0003DMG400015429	PGSC0003DMT400039889	antisense	intergenic	1511	convergent	downstream
MSTRG.13424.1	StLNC0905	PGSC0003DMG400034441	PGSC0003DMT400084870	antisense	intergenic	21291	divergent	upstream
MSTRG.16934.1	StLNC0906	PGSC0003DMG400027450	PGSC0003DMT400070616	antisense	genic	0	overlapping	exonic
MSTRG.18060.6	StLNC0907	PGSC0003DMG400026195	PGSC0003DMT400067383	sense	intergenic	6127	same_strand	downstream
MSTRG.1353.1	StLNC0908	PGSC0003DMG400032110	PGSC0003DMT400081764	antisense	intergenic	5262	convergent	downstream
MSTRG.11576.1	StLNC0909	PGSC0003DMG400012903	PGSC0003DMT400033597	sense	intergenic	19527	same_strand	upstream
MSTRG.28925.1	StLNC0910	PGSC0003DMG400017760	PGSC0003DMT400045802	antisense	intergenic	11846	divergent	upstream
MSTRG.23245.62	StLNC0911	PGSC0003DMG400021603	PGSC0003DMT400055632	antisense	genic	0	nested	exonic
MSTRG.7258.3	StLNC0912	PGSC0003DMG400011959	PGSC0003DMT400031215	antisense	intergenic	7311	divergent	upstream
MSTRG.1039.2	StLNC0913	PGSC0003DMG400035125	PGSC0003DMT400085554	antisense	intergenic	2646	divergent	upstream
MSTRG.2276.2	StLNC0914	PGSC0003DMG400000107	PGSC0003DMT400000316	antisense	intergenic	2089	convergent	downstream
MSTRG.5522.1	StLNC0915	PGSC0003DMG400001568	PGSC0003DMT400003984	sense	intergenic	3812	same_strand	upstream
MSTRG.11805.4	StLNC0916	PGSC0003DMG400008006	PGSC0003DMT400020657	sense	intergenic	3805	same_strand	upstream
MSTRG.23245.43	StLNC0917	PGSC0003DMG400021603	PGSC0003DMT400055632	antisense	genic	0	nested	exonic
MSTRG.986.1	StLNC0918	PGSC0003DMG400001211	PGSC0003DMT400003054	sense	intergenic	6733	same_strand	upstream
MSTRG.8270.1	StLNC0919	PGSC0003DMG400010143	PGSC0003DMT400026285	antisense	genic	0	containing	exonic
MSTRG.17514.1	StLNC0920	PGSC0003DMG400046262	PGSC0003DMT400096691	sense	intergenic	7522	same_strand	downstream
MSTRG.28296.44	StLNC0921	PGSC0003DMG400021934	PGSC0003DMT400056456	sense	intergenic	94788	same_strand	downstream
MSTRG.18964.1	StLNC0922	PGSC0003DMG400020488	PGSC0003DMT400052781	antisense	genic	0	overlapping	exonic
MSTRG.657.1	StLNC0923	PGSC0003DMG400019842	PGSC0003DMT400051095	sense	genic	0	containing	intronic
MSTRG.11357.4	StLNC0924	PGSC0003DMG400031145	PGSC0003DMT400079988	sense	intergenic	2137	same_strand	upstream
MSTRG.1061.4	StLNC0925	PGSC0003DMG400002436	PGSC0003DMT400006250	antisense	intergenic	32604	convergent	downstream
MSTRG.10002.1	StLNC0926	PGSC0003DMG400047103	PGSC0003DMT400097532	sense	intergenic	5344	same_strand	upstream
MSTRG.26301.2	StLNC0927	PGSC0003DMG400012063	PGSC0003DMT400031457	antisense	intergenic	18435	divergent	upstream
MSTRG.27019.16	StLNC0928	PGSC0003DMG400042452	PGSC0003DMT400092881	antisense	genic	0	containing	intronic
MSTRG.28123.4	StLNC0929	PGSC0003DMG400047320	PGSC0003DMT400097749	sense	intergenic	6399	same_strand	downstream
MSTRG.11136.1	StLNC0930	PGSC0003DMG400023032	PGSC0003DMT400059281	antisense	intergenic	12996	divergent	upstream
MSTRG.11640.2	StLNC0931	PGSC0003DMG400009332	PGSC0003DMT400024144	antisense	intergenic	20864	divergent	upstream
MSTRG.24689.1	StLNC0932	PGSC0003DMG402008383	PGSC0003DMT400021607	sense	intergenic	330	same_strand	downstream
MSTRG.27644.5	StLNC0933	PGSC0003DMG400000323	PGSC0003DMT400000859	antisense	intergenic	4720	convergent	downstream
MSTRG.22820.1	StLNC0934	PGSC0003DMG401017193	PGSC0003DMT400044270	antisense	intergenic	14807	convergent	downstream
MSTRG.7265.1	StLNC0935	PGSC0003DMG400026809	PGSC0003DMT400068926	antisense	intergenic	3974	divergent	upstream
MSTRG.27533.1	StLNC0936	PGSC0003DMG400007898	PGSC0003DMT400020442	antisense	intergenic	2122	divergent	upstream
MSTRG.313.8	StLNC0937	PGSC0003DMG401016399	PGSC0003DMT400042251	antisense	intergenic	7455	divergent	upstream
MSTRG.14960.2	StLNC0938	PGSC0003DMG401006646	PGSC0003DMT400017021	sense	intergenic	12684	same_strand	upstream
MSTRG.10466.2	StLNC0939	PGSC0003DMG400025586	PGSC0003DMT400065742	sense	intergenic	18027	same_strand	downstream
MSTRG.11254.12	StLNC0940	PGSC0003DMG400000776	PGSC0003DMT400002035	antisense	genic	0	overlapping	exonic
MSTRG.13027.2	StLNC0941	PGSC0003DMG400018607	PGSC0003DMT400047874	sense	intergenic	386	same_strand	downstream
MSTRG.20031.2	StLNC0942	PGSC0003DMG400034395	PGSC0003DMT400084824	antisense	intergenic	7933	divergent	upstream
MSTRG.7158.10	StLNC0943	PGSC0003DMG400037014	PGSC0003DMT400087443	antisense	genic	0	containing	intronic
MSTRG.19495.1	StLNC0944	PGSC0003DMG400032784	PGSC0003DMT400082725	antisense	intergenic	24625	divergent	upstream
MSTRG.26526.3	StLNC0945	PGSC0003DMG400022861	PGSC0003DMT400058836	sense	intergenic	48	same_strand	downstream
MSTRG.16764.1	StLNC0946	PGSC0003DMG400024039	PGSC0003DMT400061778	antisense	intergenic	53108	convergent	downstream
MSTRG.9975.1	StLNC0947	PGSC0003DMG400011476	PGSC0003DMT400029859	sense	intergenic	103	same_strand	downstream
MSTRG.17258.29	StLNC0948	PGSC0003DMG400009565	PGSC0003DMT400024747	sense	genic	0	containing	intronic
MSTRG.13727.1	StLNC0949	PGSC0003DMG400016797	PGSC0003DMT400043270	antisense	intergenic	15080	divergent	upstream
MSTRG.28296.17	StLNC0950	PGSC0003DMG400021934	PGSC0003DMT400056456	sense	intergenic	30824	same_strand	downstream
MSTRG.627.1	StLNC0951	PGSC0003DMG400020882	PGSC0003DMT400053837	sense	intergenic	387	same_strand	downstream
MSTRG.26759.3	StLNC0952	PGSC0003DMG400000444	PGSC0003DMT400001180	antisense	genic	0	overlapping	exonic
MSTRG.2637.1	StLNC0953	PGSC0003DMG400024713	PGSC0003DMT400063561	sense	intergenic	651	same_strand	upstream
MSTRG.10210.4	StLNC0954	PGSC0003DMG400027267	PGSC0003DMT400070152	sense	intergenic	1395	same_strand	downstream
MSTRG.2524.1	StLNC0955	PGSC0003DMG400028566	PGSC0003DMT400073535	antisense	intergenic	6916	divergent	upstream
MSTRG.8738.1	StLNC0956	PGSC0003DMG400024532	PGSC0003DMT400063067	antisense	intergenic	8769	convergent	downstream
MSTRG.26119.1	StLNC0957	PGSC0003DMG400012073	PGSC0003DMT400031487	antisense	intergenic	20778	divergent	upstream
MSTRG.23245.63	StLNC0958	PGSC0003DMG400021603	PGSC0003DMT400055632	antisense	genic	0	nested	exonic
MSTRG.23767.1	StLNC0959	PGSC0003DMG400029187	PGSC0003DMT400075040	sense	intergenic	2494	same_strand	downstream
MSTRG.19637.2	StLNC0960	PGSC0003DMG400043546	PGSC0003DMT400093975	antisense	intergenic	1227	divergent	upstream
MSTRG.12209.4	StLNC0961	PGSC0003DMG402009997	PGSC0003DMT400025891	antisense	intergenic	147	divergent	upstream
MSTRG.2458.2	StLNC0962	PGSC0003DMG400022520	PGSC0003DMT400058008	sense	intergenic	5838	same_strand	downstream
MSTRG.12008.1	StLNC0963	PGSC0003DMG400003691	PGSC0003DMT400009471	antisense	genic	0	overlapping	exonic
MSTRG.10795.3	StLNC0964	PGSC0003DMG400004142	PGSC0003DMT400010608	sense	intergenic	605	same_strand	downstream
MSTRG.28525.1	StLNC0965	PGSC0003DMG400034819	PGSC0003DMT400085248	sense	intergenic	75009	same_strand	upstream
MSTRG.6135.1	StLNC0966	PGSC0003DMG400010082	PGSC0003DMT400026154	sense	intergenic	7	same_strand	upstream
MSTRG.11502.1	StLNC0967	PGSC0003DMG400030801	PGSC0003DMT400079138	sense	intergenic	2061	same_strand	downstream
MSTRG.19613.5	StLNC0968	PGSC0003DMG400034868	PGSC0003DMT400085297	antisense	intergenic	26655	divergent	upstream
MSTRG.17318.1	StLNC0969	PGSC0003DMG400013784	PGSC0003DMT400035812	antisense	genic	0	overlapping	intronic
MSTRG.4890.2	StLNC0970	PGSC0003DMG400028451	PGSC0003DMT400073221	sense	intergenic	6840	same_strand	downstream
MSTRG.20602.3	StLNC0971	PGSC0003DMG400004829	PGSC0003DMT400012323	antisense	intergenic	4018	divergent	upstream
MSTRG.18130.2	StLNC0972	PGSC0003DMG401018368	PGSC0003DMT400047296	antisense	genic	0	containing	exonic
MSTRG.20280.1	StLNC0973	PGSC0003DMG400003444	PGSC0003DMT400008869	antisense	intergenic	4475	convergent	downstream
MSTRG.28168.13	StLNC0974	PGSC0003DMG400005293	PGSC0003DMT400013554	antisense	intergenic	2063	convergent	downstream
MSTRG.8007.2	StLNC0975	PGSC0003DMG400003212	PGSC0003DMT400008338	antisense	intergenic	9255	convergent	downstream
MSTRG.13157.1	StLNC0976	PGSC0003DMG400015056	PGSC0003DMT400038931	antisense	genic	0	containing	intronic
MSTRG.21844.3	StLNC0977	PGSC0003DMG400030270	PGSC0003DMT400077817	antisense	intergenic	13343	convergent	downstream
MSTRG.5741.1	StLNC0978	PGSC0003DMG400041436	PGSC0003DMT400091865	antisense	genic	0	overlapping	exonic
MSTRG.21997.2	StLNC0979	PGSC0003DMG400017502	PGSC0003DMT400045124	antisense	intergenic	330	divergent	upstream
MSTRG.28369.3	StLNC0980	PGSC0003DMG400039445	PGSC0003DMT400089874	antisense	genic	0	containing	intronic
MSTRG.17523.8	StLNC0981	PGSC0003DMG400030289	PGSC0003DMT400077861	sense	intergenic	6726	same_strand	upstream
MSTRG.23635.1	StLNC0982	PGSC0003DMG401026622	PGSC0003DMT400068462	sense	intergenic	3628	same_strand	upstream
MSTRG.18001.2	StLNC0983	PGSC0003DMG400010603	PGSC0003DMT400027507	antisense	genic	0	nested	intronic
MSTRG.23658.4	StLNC0984	PGSC0003DMG400022826	PGSC0003DMT400058755	antisense	intergenic	1492	divergent	upstream
MSTRG.26980.3	StLNC0985	PGSC0003DMG400008083	PGSC0003DMT400020878	sense	intergenic	9654	same_strand	upstream
MSTRG.21806.1	StLNC0986	PGSC0003DMG400026573	PGSC0003DMT400068337	sense	intergenic	7097	same_strand	downstream
MSTRG.3023.2	StLNC0987	PGSC0003DMG400023807	PGSC0003DMT400061174	antisense	intergenic	1690	convergent	downstream
MSTRG.9856.1	StLNC0988	PGSC0003DMG400011517	PGSC0003DMT400030011	sense	intergenic	2147	same_strand	downstream
MSTRG.23977.1	StLNC0989	PGSC0003DMG400038520	PGSC0003DMT400088949	sense	intergenic	129	same_strand	upstream
MSTRG.172.7	StLNC0990	PGSC0003DMG402032203	PGSC0003DMT400082016	antisense	intergenic	4063	divergent	upstream
MSTRG.14406.1	StLNC0991	PGSC0003DMG400020571	PGSC0003DMT400053011	sense	genic	0	containing	intronic
MSTRG.27351.9	StLNC0992	PGSC0003DMG400015364	PGSC0003DMT400039755	antisense	genic	0	nested	exonic
MSTRG.13195.1	StLNC0993	PGSC0003DMG400035847	PGSC0003DMT400086276	sense	intergenic	32003	same_strand	downstream
MSTRG.3023.1	StLNC0994	PGSC0003DMG400023779	PGSC0003DMT400061120	sense	intergenic	518	same_strand	downstream
MSTRG.28296.40	StLNC0995	PGSC0003DMG400021934	PGSC0003DMT400056456	sense	intergenic	93560	same_strand	downstream
MSTRG.21482.1	StLNC0996	PGSC0003DMG400003863	PGSC0003DMT400009848	antisense	genic	0	nested	intronic
MSTRG.18059.20	StLNC0997	PGSC0003DMG400035134	PGSC0003DMT400085563	antisense	intergenic	7549	convergent	downstream
MSTRG.23427.1	StLNC0998	PGSC0003DMG400025028	PGSC0003DMT400064422	sense	intergenic	1191	same_strand	downstream
MSTRG.23497.2	StLNC0999	PGSC0003DMG400021293	PGSC0003DMT400054850	sense	intergenic	468	same_strand	upstream
MSTRG.27024.2	StLNC1000	PGSC0003DMG400019667	PGSC0003DMT400050619	sense	intergenic	6194	same_strand	upstream
MSTRG.17253.2	StLNC1001	PGSC0003DMG400009775	PGSC0003DMT400025323	sense	intergenic	11321	same_strand	downstream
MSTRG.14524.1	StLNC1002	PGSC0003DMG400003469	PGSC0003DMT400008916	antisense	intergenic	4481	convergent	downstream
MSTRG.7040.1	StLNC1003	PGSC0003DMG400018774	PGSC0003DMT400048315	antisense	intergenic	7101	divergent	upstream
MSTRG.16089.1	StLNC1004	PGSC0003DMG401026992	PGSC0003DMT400069427	sense	intergenic	8	same_strand	downstream
MSTRG.26299.1	StLNC1005	PGSC0003DMG400031186	PGSC0003DMT400080089	sense	intergenic	2571	same_strand	downstream
MSTRG.14891.1	StLNC1006	PGSC0003DMG400029220	PGSC0003DMT400075120	sense	intergenic	13655	same_strand	upstream
MSTRG.17504.3	StLNC1007	PGSC0003DMG400012049	PGSC0003DMT400031428	sense	genic	0	containing	intronic
MSTRG.816.1	StLNC1008	PGSC0003DMG400031460	PGSC0003DMT400080772	antisense	intergenic	11260	divergent	upstream
MSTRG.15870.1	StLNC1009	PGSC0003DMG402028522	PGSC0003DMT400073401	sense	genic	0	nested	intronic
MSTRG.1537.1	StLNC1010	PGSC0003DMG400000846	PGSC0003DMT400002209	antisense	intergenic	3605	convergent	downstream
MSTRG.19488.2	StLNC1011	PGSC0003DMG400015854	PGSC0003DMT400040979	sense	intergenic	1882	same_strand	upstream
MSTRG.12368.1	StLNC1012	PGSC0003DMG400005585	PGSC0003DMT400014243	antisense	genic	0	overlapping	exonic
MSTRG.9202.1	StLNC1013	PGSC0003DMG400005694	PGSC0003DMT400014547	antisense	genic	0	overlapping	exonic
MSTRG.27008.1	StLNC1014	PGSC0003DMG400001142	PGSC0003DMT400002919	antisense	genic	0	overlapping	exonic
MSTRG.28205.1	StLNC1015	PGSC0003DMG400019372	PGSC0003DMT400049859	sense	intergenic	1372	same_strand	downstream
MSTRG.12365.5	StLNC1016	PGSC0003DMG400005586	PGSC0003DMT400014246	sense	intergenic	4546	same_strand	downstream
MSTRG.5509.1	StLNC1017	PGSC0003DMG400001514	PGSC0003DMT400003820	antisense	intergenic	232	convergent	downstream
MSTRG.15262.14	StLNC1018	PGSC0003DMG400042570	PGSC0003DMT400092999	antisense	genic	0	overlapping	exonic
MSTRG.23548.1	StLNC1019	PGSC0003DMG400010542	PGSC0003DMT400027337	antisense	genic	0	overlapping	exonic
MSTRG.19488.3	StLNC1020	PGSC0003DMG400015854	PGSC0003DMT400040979	sense	intergenic	1045	same_strand	upstream
MSTRG.7258.6	StLNC1021	PGSC0003DMG400011959	PGSC0003DMT400031215	antisense	intergenic	7754	divergent	upstream
MSTRG.1248.1	StLNC1022	PGSC0003DMG400022660	PGSC0003DMT400058344	sense	intergenic	13749	same_strand	downstream
MSTRG.7123.2	StLNC1023	PGSC0003DMG400008716	PGSC0003DMT400022486	sense	intergenic	39107	same_strand	downstream
MSTRG.28277.4	StLNC1024	PGSC0003DMG400016754	PGSC0003DMT400043177	antisense	intergenic	8735	divergent	upstream
MSTRG.28726.4	StLNC1025	PGSC0003DMG402004368	PGSC0003DMT400011160	sense	intergenic	2757	same_strand	upstream
MSTRG.5635.11	StLNC1026	PGSC0003DMG400003631	PGSC0003DMT400009342	sense	genic	0	nested	intronic
MSTRG.23991.1	StLNC1027	PGSC0003DMG400017689	PGSC0003DMT400045604	antisense	intergenic	73963	divergent	upstream
MSTRG.23216.2	StLNC1028	PGSC0003DMG400011904	PGSC0003DMT400031072	antisense	genic	0	nested	intronic
MSTRG.3775.1	StLNC1029	PGSC0003DMG400042313	PGSC0003DMT400092742	sense	genic	0	containing	intronic
MSTRG.23245.40	StLNC1030	PGSC0003DMG400021603	PGSC0003DMT400055632	antisense	genic	0	nested	exonic
MSTRG.28296.19	StLNC1031	PGSC0003DMG400021934	PGSC0003DMT400056456	sense	intergenic	30825	same_strand	downstream
MSTRG.11254.28	StLNC1032	PGSC0003DMG400000777	PGSC0003DMT400002036	antisense	genic	0	overlapping	exonic
MSTRG.2502.3	StLNC1033	PGSC0003DMG400028591	PGSC0003DMT400073599	sense	intergenic	5133	same_strand	downstream
MSTRG.28068.1	StLNC1034	PGSC0003DMG400034608	PGSC0003DMT400085037	antisense	intergenic	4067	convergent	downstream
MSTRG.12298.1	StLNC1035	PGSC0003DMG400028377	PGSC0003DMT400072941	sense	intergenic	977	same_strand	upstream
MSTRG.5798.1	StLNC1036	PGSC0003DMG400037504	PGSC0003DMT400087933	antisense	intergenic	4335	divergent	upstream
MSTRG.23991.5	StLNC1037	PGSC0003DMG400017689	PGSC0003DMT400045604	antisense	intergenic	86534	divergent	upstream
MSTRG.7098.1	StLNC1038	PGSC0003DMG400037066	PGSC0003DMT400087495	sense	genic	0	containing	intronic
MSTRG.14935.1	StLNC1039	PGSC0003DMG400016635	PGSC0003DMT400042903	antisense	genic	0	overlapping	intronic
MSTRG.23692.1	StLNC1040	PGSC0003DMG400018886	PGSC0003DMT400048612	sense	intergenic	6844	same_strand	upstream
MSTRG.20978.3	StLNC1041	PGSC0003DMG400012149	PGSC0003DMT400031677	antisense	intergenic	3174	divergent	upstream
MSTRG.28525.5	StLNC1042	PGSC0003DMG400034819	PGSC0003DMT400085248	sense	intergenic	75198	same_strand	upstream
MSTRG.26910.1	StLNC1043	PGSC0003DMG400019617	PGSC0003DMT400050486	sense	intergenic	2879	same_strand	upstream
MSTRG.11087.1	StLNC1044	PGSC0003DMG400019689	PGSC0003DMT400050703	sense	intergenic	2842	same_strand	downstream
MSTRG.17258.46	StLNC1045	PGSC0003DMG400009565	PGSC0003DMT400024747	sense	genic	0	containing	intronic
MSTRG.5405.5	StLNC1046	PGSC0003DMG400025596	PGSC0003DMT400065755	sense	intergenic	723	same_strand	downstream
MSTRG.18203.10	StLNC1047	PGSC0003DMG400045812	PGSC0003DMT400096241	antisense	genic	0	containing	intronic
MSTRG.12727.1	StLNC1048	PGSC0003DMG400037333	PGSC0003DMT400087762	sense	intergenic	13989	same_strand	upstream
MSTRG.17258.34	StLNC1049	PGSC0003DMG400009565	PGSC0003DMT400024747	sense	genic	0	containing	intronic
MSTRG.18130.1	StLNC1050	PGSC0003DMG402018368	PGSC0003DMT400047298	antisense	genic	0	overlapping	exonic
MSTRG.292.51	StLNC1051	PGSC0003DMG400016409	PGSC0003DMT400042319	sense	genic	0	containing	intronic
MSTRG.504.1	StLNC1052	PGSC0003DMG400030005	PGSC0003DMT400077160	sense	intergenic	18830	same_strand	upstream
MSTRG.23245.4	StLNC1053	PGSC0003DMG400021603	PGSC0003DMT400055632	antisense	genic	0	nested	exonic
MSTRG.25361.3	StLNC1054	PGSC0003DMG400013351	PGSC0003DMT400034750	sense	intergenic	5428	same_strand	downstream
MSTRG.21574.1	StLNC1055	PGSC0003DMG400036874	PGSC0003DMT400087303	antisense	intergenic	4171	divergent	upstream
MSTRG.7094.1	StLNC1056	PGSC0003DMG400040095	PGSC0003DMT400090524	antisense	genic	0	containing	intronic
MSTRG.3492.2	StLNC1057	PGSC0003DMG400025172	PGSC0003DMT400064813	antisense	intergenic	237	convergent	downstream
MSTRG.17435.1	StLNC1058	PGSC0003DMG400005374	PGSC0003DMT400013738	sense	intergenic	1537	same_strand	upstream
MSTRG.7863.3	StLNC1059	PGSC0003DMG400041197	PGSC0003DMT400091626	antisense	intergenic	3570	convergent	downstream
MSTRG.22066.7	StLNC1060	PGSC0003DMG400029011	PGSC0003DMT400074622	sense	intergenic	797	same_strand	upstream
MSTRG.24117.5	StLNC1061	PGSC0003DMG400043806	PGSC0003DMT400094235	sense	intergenic	54367	same_strand	upstream
MSTRG.23245.9	StLNC1062	PGSC0003DMG400021603	PGSC0003DMT400055632	antisense	genic	0	nested	exonic
MSTRG.28001.2	StLNC1063	PGSC0003DMG400027873	PGSC0003DMT400071652	antisense	intergenic	24054	convergent	downstream
MSTRG.16717.1	StLNC1064	PGSC0003DMG400020050	PGSC0003DMT400051632	sense	intergenic	849	same_strand	downstream
MSTRG.21778.1	StLNC1065	PGSC0003DMG400026617	PGSC0003DMT400068450	antisense	intergenic	21412	convergent	downstream
MSTRG.24117.2	StLNC1066	PGSC0003DMG400043806	PGSC0003DMT400094235	sense	intergenic	54118	same_strand	upstream
MSTRG.14921.2	StLNC1067	PGSC0003DMG400010876	PGSC0003DMT400028200	sense	intergenic	13277	same_strand	downstream
MSTRG.13460.3	StLNC1068	PGSC0003DMG400023041	PGSC0003DMT400059300	sense	intergenic	4965	same_strand	upstream
MSTRG.15041.1	StLNC1069	PGSC0003DMG400004518	PGSC0003DMT400011496	antisense	genic	0	overlapping	exonic
MSTRG.19012.1	StLNC1070	PGSC0003DMG400029247	PGSC0003DMT400075172	antisense	genic	0	overlapping	exonic
MSTRG.24117.4	StLNC1071	PGSC0003DMG400043806	PGSC0003DMT400094235	sense	intergenic	54340	same_strand	upstream
MSTRG.28296.2	StLNC1072	PGSC0003DMG400021934	PGSC0003DMT400056456	sense	intergenic	28445	same_strand	downstream
MSTRG.27835.3	StLNC1073	PGSC0003DMG400024274	PGSC0003DMT400062367	sense	intergenic	746	same_strand	downstream
MSTRG.25508.1	StLNC1074	PGSC0003DMG400016117	PGSC0003DMT400041582	antisense	intergenic	427	convergent	downstream
MSTRG.11168.2	StLNC1075	PGSC0003DMG400024863	PGSC0003DMT400063966	sense	intergenic	2567	same_strand	upstream
MSTRG.10694.1	StLNC1076	PGSC0003DMG400031498	PGSC0003DMT400080879	antisense	intergenic	9595	divergent	upstream
MSTRG.11116.1	StLNC1077	PGSC0003DMG400025319	PGSC0003DMT400065148	antisense	genic	0	overlapping	exonic
MSTRG.23827.5	StLNC1078	PGSC0003DMG400003245	PGSC0003DMT400008406	sense	intergenic	21596	same_strand	upstream
MSTRG.10025.1	StLNC1079	PGSC0003DMG400006337	PGSC0003DMT400016212	sense	intergenic	3189	same_strand	downstream
MSTRG.11140.1	StLNC1080	PGSC0003DMG400046448	PGSC0003DMT400096877	sense	intergenic	2196	same_strand	downstream
MSTRG.28393.1	StLNC1081	PGSC0003DMG400035585	PGSC0003DMT400086014	sense	intergenic	5933	same_strand	upstream
MSTRG.10210.7	StLNC1082	PGSC0003DMG400027267	PGSC0003DMT400070152	sense	genic	0	containing	intronic
MSTRG.29313.9	StLNC1083	PGSC0003DMG400004675	PGSC0003DMT400011908	antisense	genic	0	overlapping	exonic
MSTRG.19683.5	StLNC1084	PGSC0003DMG401018810	PGSC0003DMT400048422	sense	intergenic	2973	same_strand	downstream
MSTRG.27582.2	StLNC1085	PGSC0003DMG401002909	PGSC0003DMT400007531	antisense	genic	0	overlapping	exonic
MSTRG.19641.2	StLNC1086	PGSC0003DMG400036825	PGSC0003DMT400087254	sense	intergenic	23172	same_strand	downstream
MSTRG.24977.3	StLNC1087	PGSC0003DMG400028221	PGSC0003DMT400072533	sense	intergenic	3391	same_strand	downstream
MSTRG.4518.4	StLNC1088	PGSC0003DMG400030199	PGSC0003DMT400077631	antisense	intergenic	4551	divergent	upstream
MSTRG.24065.1	StLNC1089	PGSC0003DMG400025406	PGSC0003DMT400065363	sense	intergenic	4388	same_strand	downstream
MSTRG.17456.1	StLNC1090	PGSC0003DMG400024326	PGSC0003DMT400062505	sense	intergenic	12306	same_strand	downstream
MSTRG.17906.2	StLNC1091	PGSC0003DMG400006128	PGSC0003DMT400015684	sense	intergenic	169	same_strand	downstream
MSTRG.116.1	StLNC1092	PGSC0003DMG400032133	PGSC0003DMT400081837	antisense	intergenic	4795	convergent	downstream
MSTRG.2753.3	StLNC1093	PGSC0003DMG400002789	PGSC0003DMT400007215	sense	intergenic	1470	same_strand	downstream
MSTRG.7486.2	StLNC1094	PGSC0003DMG400038931	PGSC0003DMT400089360	antisense	intergenic	6956	divergent	upstream
MSTRG.26401.1	StLNC1095	PGSC0003DMG400036515	PGSC0003DMT400086944	sense	intergenic	58554	same_strand	upstream
MSTRG.19684.1	StLNC1096	PGSC0003DMG401018810	PGSC0003DMT400048422	antisense	genic	0	containing	intronic
MSTRG.23245.42	StLNC1097	PGSC0003DMG400021603	PGSC0003DMT400055632	antisense	genic	0	nested	exonic
MSTRG.1530.2	StLNC1098	PGSC0003DMG400042533	PGSC0003DMT400092962	antisense	intergenic	9793	convergent	downstream
MSTRG.23991.2	StLNC1099	PGSC0003DMG400017689	PGSC0003DMT400045604	antisense	intergenic	74666	divergent	upstream
MSTRG.17737.7	StLNC1100	PGSC0003DMG400013537	PGSC0003DMT400035206	antisense	genic	0	nested	exonic
MSTRG.3483.7	StLNC1101	PGSC0003DMG400025169	PGSC0003DMT400064797	sense	intergenic	368	same_strand	downstream
MSTRG.20598.2	StLNC1102	PGSC0003DMG400004774	PGSC0003DMT400012181	sense	intergenic	96339	same_strand	downstream
MSTRG.8787.2	StLNC1103	PGSC0003DMG400024656	PGSC0003DMT400063387	antisense	genic	0	nested	exonic
MSTRG.26254.2	StLNC1104	PGSC0003DMG400031412	PGSC0003DMT400080661	antisense	intergenic	9240	divergent	upstream
MSTRG.25407.17	StLNC1105	PGSC0003DMG400036408	PGSC0003DMT400086837	antisense	intergenic	1386	convergent	downstream
MSTRG.26544.1	StLNC1106	PGSC0003DMG400022867	PGSC0003DMT400058860	sense	intergenic	67	same_strand	upstream
MSTRG.21971.1	StLNC1107	PGSC0003DMG400045596	PGSC0003DMT400096025	antisense	intergenic	41679	divergent	upstream
MSTRG.26527.1	StLNC1108	PGSC0003DMG400022861	PGSC0003DMT400058836	sense	intergenic	6505	same_strand	downstream
MSTRG.7077.7	StLNC1109	PGSC0003DMG400046350	PGSC0003DMT400096779	sense	genic	0	containing	intronic
MSTRG.3483.5	StLNC1110	PGSC0003DMG400025169	PGSC0003DMT400064797	sense	intergenic	221	same_strand	downstream
MSTRG.8362.1	StLNC1111	PGSC0003DMG400015251	PGSC0003DMT400039443	antisense	genic	0	overlapping	exonic
MSTRG.10900.1	StLNC1112	PGSC0003DMG400006698	PGSC0003DMT400017163	sense	intergenic	554	same_strand	downstream
MSTRG.3010.2	StLNC1113	PGSC0003DMG400044001	PGSC0003DMT400094430	antisense	intergenic	622	divergent	upstream
MSTRG.10366.2	StLNC1114	PGSC0003DMG400010641	PGSC0003DMT400027602	antisense	intergenic	7362	divergent	upstream
MSTRG.9482.1	StLNC1115	PGSC0003DMG401009189	PGSC0003DMT400023752	antisense	intergenic	11268	divergent	upstream
MSTRG.29317.174	StLNC1116	PGSC0003DMG400004593	PGSC0003DMT400011693	antisense	intergenic	13087	divergent	upstream
MSTRG.18064.1	StLNC1117	PGSC0003DMG400026163	PGSC0003DMT400067285	antisense	intergenic	60	convergent	downstream
MSTRG.172.6	StLNC1118	PGSC0003DMG402032203	PGSC0003DMT400082016	antisense	genic	0	overlapping	exonic
MSTRG.29284.2	StLNC1119	PGSC0003DMG400004667	PGSC0003DMT400011891	antisense	intergenic	14124	convergent	downstream
MSTRG.1243.46	StLNC1120	PGSC0003DMG400022660	PGSC0003DMT400058344	antisense	intergenic	9377	convergent	downstream
MSTRG.18940.2	StLNC1121	PGSC0003DMG400012503	PGSC0003DMT400032552	antisense	intergenic	36649	convergent	downstream
MSTRG.23528.3	StLNC1122	PGSC0003DMG400006719	PGSC0003DMT400017240	sense	intergenic	6314	same_strand	upstream
MSTRG.29313.21	StLNC1123	PGSC0003DMG400004677	PGSC0003DMT400011911	antisense	genic	0	overlapping	exonic
MSTRG.25954.1	StLNC1124	PGSC0003DMG400003992	PGSC0003DMT400010194	sense	intergenic	110	same_strand	downstream
MSTRG.25473.3	StLNC1125	PGSC0003DMG400015675	PGSC0003DMT400040488	sense	intergenic	1559	same_strand	upstream
MSTRG.14028.2	StLNC1126	PGSC0003DMG400023517	PGSC0003DMT400060462	antisense	intergenic	7927	divergent	upstream
MSTRG.5156.1	StLNC1127	PGSC0003DMG400022418	PGSC0003DMT400057744	antisense	genic	0	overlapping	exonic
MSTRG.25183.1	StLNC1128	PGSC0003DMG400035573	PGSC0003DMT400086002	antisense	genic	0	containing	exonic
MSTRG.25746.1	StLNC1129	PGSC0003DMG400041203	PGSC0003DMT400091632	antisense	intergenic	106	divergent	upstream
MSTRG.27146.19	StLNC1130	PGSC0003DMG401002977	PGSC0003DMT400007696	sense	intergenic	10210	same_strand	upstream
MSTRG.5035.2	StLNC1131	PGSC0003DMG400031770	PGSC0003DMT400081285	antisense	intergenic	3839	divergent	upstream
MSTRG.5430.1	StLNC1132	PGSC0003DMG400017737	PGSC0003DMT400045740	antisense	intergenic	3103	convergent	downstream
MSTRG.29317.172	StLNC1133	PGSC0003DMG400004593	PGSC0003DMT400011693	antisense	intergenic	7155	divergent	upstream
MSTRG.23245.68	StLNC1134	PGSC0003DMG400021603	PGSC0003DMT400055632	antisense	genic	0	nested	exonic
MSTRG.25123.2	StLNC1135	PGSC0003DMG400029822	PGSC0003DMT400076678	sense	intergenic	111	same_strand	upstream
MSTRG.26332.1	StLNC1136	PGSC0003DMG400002187	PGSC0003DMT400005588	antisense	genic	0	overlapping	exonic
MSTRG.28650.1	StLNC1137	PGSC0003DMG400026452	PGSC0003DMT400068012	sense	intergenic	11136	same_strand	upstream
MSTRG.22134.2	StLNC1138	PGSC0003DMG400040698	PGSC0003DMT400091127	antisense	intergenic	254	convergent	downstream
MSTRG.10651.1	StLNC1139	PGSC0003DMG400038483	PGSC0003DMT400088912	antisense	intergenic	14792	divergent	upstream
MSTRG.7258.4	StLNC1140	PGSC0003DMG400011959	PGSC0003DMT400031215	antisense	intergenic	7312	divergent	upstream
MSTRG.27645.6	StLNC1141	PGSC0003DMG400000323	PGSC0003DMT400000859	antisense	intergenic	353	convergent	downstream
MSTRG.21255.1	StLNC1142	PGSC0003DMG400008846	PGSC0003DMT400022802	antisense	intergenic	84	convergent	downstream
MSTRG.14431.4	StLNC1143	PGSC0003DMG400020553	PGSC0003DMT400052964	sense	genic	0	overlapping	intronic
MSTRG.28553.2	StLNC1144	PGSC0003DMG400014452	PGSC0003DMT400037454	sense	intergenic	6993	same_strand	upstream
MSTRG.80.16	StLNC1145	PGSC0003DMG400032169	PGSC0003DMT400081953	antisense	intergenic	20874	divergent	upstream
MSTRG.9772.1	StLNC1146	PGSC0003DMG400031372	PGSC0003DMT400080565	antisense	genic	0	overlapping	exonic
MSTRG.6037.1	StLNC1147	PGSC0003DMG400004010	PGSC0003DMT400010250	sense	intergenic	728	same_strand	downstream
MSTRG.27579.1	StLNC1148	PGSC0003DMG401002909	PGSC0003DMT400007531	antisense	genic	0	overlapping	intronic
MSTRG.20070.1	StLNC1149	PGSC0003DMG400005498	PGSC0003DMT400014020	sense	intergenic	26200	same_strand	upstream
MSTRG.12179.3	StLNC1150	PGSC0003DMG400009984	PGSC0003DMT400025858	sense	intergenic	6856	same_strand	upstream
MSTRG.4168.2	StLNC1151	PGSC0003DMG402012010	PGSC0003DMT400031342	antisense	genic	0	nested	exonic
MSTRG.28296.27	StLNC1152	PGSC0003DMG400021934	PGSC0003DMT400056456	sense	intergenic	88896	same_strand	downstream
MSTRG.10375.3	StLNC1153	PGSC0003DMG400003246	PGSC0003DMT400008407	antisense	genic	0	containing	intronic
MSTRG.1213.3	StLNC1154	PGSC0003DMG400011334	PGSC0003DMT400029476	antisense	intergenic	4707	convergent	downstream
MSTRG.24735.1	StLNC1155	PGSC0003DMG400011029	PGSC0003DMT400028653	antisense	genic	0	overlapping	exonic
MSTRG.13104.1	StLNC1156	PGSC0003DMG400011978	PGSC0003DMT400031254	sense	intergenic	5646	same_strand	upstream
MSTRG.1838.1	StLNC1157	PGSC0003DMG400001700	PGSC0003DMT400004281	sense	intergenic	10700	same_strand	downstream
MSTRG.29317.114	StLNC1158	PGSC0003DMG400004593	PGSC0003DMT400011693	antisense	intergenic	4313	divergent	upstream
MSTRG.20603.2	StLNC1159	PGSC0003DMG400037639	PGSC0003DMT400088068	sense	intergenic	69934	same_strand	downstream
MSTRG.26405.1	StLNC1160	PGSC0003DMG400008770	PGSC0003DMT400022624	antisense	genic	0	overlapping	exonic
MSTRG.15058.1	StLNC1161	PGSC0003DMG400029919	PGSC0003DMT400076929	sense	intergenic	2798	same_strand	upstream
MSTRG.11254.46	StLNC1162	PGSC0003DMG400000780	PGSC0003DMT400002042	antisense	genic	0	overlapping	exonic
MSTRG.23245.69	StLNC1163	PGSC0003DMG400021603	PGSC0003DMT400055632	antisense	genic	0	nested	exonic
MSTRG.22964.1	StLNC1164	PGSC0003DMG401001494	PGSC0003DMT400003773	antisense	genic	0	containing	exonic
MSTRG.11969.2	StLNC1165	PGSC0003DMG400005163	PGSC0003DMT400013225	antisense	intergenic	152	convergent	downstream
MSTRG.23767.2	StLNC1166	PGSC0003DMG400029187	PGSC0003DMT400075040	sense	intergenic	6034	same_strand	downstream
MSTRG.6999.1	StLNC1167	PGSC0003DMG400034096	PGSC0003DMT400084490	sense	intergenic	87999	same_strand	downstream
MSTRG.23245.72	StLNC1168	PGSC0003DMG400021603	PGSC0003DMT400055632	antisense	genic	0	nested	exonic
MSTRG.18622.1	StLNC1169	PGSC0003DMG400038720	PGSC0003DMT400089149	antisense	genic	0	nested	exonic
MSTRG.19914.1	StLNC1170	PGSC0003DMG400029085	PGSC0003DMT400074804	antisense	genic	0	overlapping	exonic
MSTRG.7043.2	StLNC1171	PGSC0003DMG400019864	PGSC0003DMT400051149	sense	intergenic	28941	same_strand	downstream
MSTRG.554.1	StLNC1172	PGSC0003DMG400006233	PGSC0003DMT400015933	antisense	genic	0	overlapping	exonic
MSTRG.11143.2	StLNC1173	PGSC0003DMG402018008	PGSC0003DMT400046401	sense	intergenic	83686	same_strand	upstream
MSTRG.15845.1	StLNC1174	PGSC0003DMG400028505	PGSC0003DMT400073342	antisense	genic	0	nested	exonic
MSTRG.24359.1	StLNC1175	PGSC0003DMG400046383	PGSC0003DMT400096812	antisense	intergenic	13946	divergent	upstream
MSTRG.14423.1	StLNC1176	PGSC0003DMG400020559	PGSC0003DMT400052984	antisense	genic	0	overlapping	exonic
MSTRG.23204.3	StLNC1177	PGSC0003DMG400006576	PGSC0003DMT400016808	sense	genic	0	containing	intronic
MSTRG.24250.3	StLNC1178	PGSC0003DMG400021982	PGSC0003DMT400056547	sense	intergenic	16139	same_strand	downstream
MSTRG.10235.1	StLNC1179	PGSC0003DMG400041458	PGSC0003DMT400091887	sense	intergenic	623	same_strand	downstream
MSTRG.1534.1	StLNC1180	PGSC0003DMG400000834	PGSC0003DMT400002180	sense	intergenic	91	same_strand	upstream
MSTRG.24697.1	StLNC1181	PGSC0003DMG401011117	PGSC0003DMT400028895	antisense	genic	0	overlapping	exonic
MSTRG.28576.2	StLNC1182	PGSC0003DMG400014467	PGSC0003DMT400037492	antisense	genic	0	nested	exonic
MSTRG.8543.1	StLNC1183	PGSC0003DMG400018090	PGSC0003DMT400046598	antisense	intergenic	23226	divergent	upstream
MSTRG.19007.2	StLNC1184	PGSC0003DMG400014104	PGSC0003DMT400036586	antisense	intergenic	98	divergent	upstream
MSTRG.29317.102	StLNC1185	PGSC0003DMG400004593	PGSC0003DMT400011693	antisense	intergenic	4313	divergent	upstream
MSTRG.5886.1	StLNC1186	PGSC0003DMG400030660	PGSC0003DMT400078795	antisense	genic	0	nested	exonic
MSTRG.20627.2	StLNC1187	PGSC0003DMG401004813	PGSC0003DMT400012263	antisense	genic	0	containing	intronic
MSTRG.21810.3	StLNC1188	PGSC0003DMG400013062	PGSC0003DMT400033973	antisense	genic	0	overlapping	exonic
MSTRG.80.3	StLNC1189	PGSC0003DMG400032169	PGSC0003DMT400081953	antisense	intergenic	20566	divergent	upstream
MSTRG.10366.1	StLNC1190	PGSC0003DMG400010641	PGSC0003DMT400027602	antisense	intergenic	6657	divergent	upstream
MSTRG.25978.2	StLNC1191	PGSC0003DMG400006071	PGSC0003DMT400015548	antisense	genic	0	overlapping	exonic
MSTRG.7258.2	StLNC1192	PGSC0003DMG400011959	PGSC0003DMT400031215	antisense	intergenic	7298	divergent	upstream
MSTRG.13916.1	StLNC1193	PGSC0003DMG401013112	PGSC0003DMT400034124	antisense	genic	0	overlapping	exonic
MSTRG.21009.2	StLNC1194	PGSC0003DMG400012261	PGSC0003DMT400031965	antisense	intergenic	5206	convergent	downstream
MSTRG.16167.1	StLNC1195	PGSC0003DMG400026941	PGSC0003DMT400069260	sense	intergenic	5075	same_strand	upstream
MSTRG.27965.2	StLNC1196	PGSC0003DMG400025620	PGSC0003DMT400065820	antisense	intergenic	622	convergent	downstream
MSTRG.10704.1	StLNC1197	PGSC0003DMG400037779	PGSC0003DMT400088208	antisense	intergenic	6734	convergent	downstream
MSTRG.28313.1	StLNC1198	PGSC0003DMG400035822	PGSC0003DMT400086251	sense	intergenic	6416	same_strand	downstream
MSTRG.11292.7	StLNC1199	PGSC0003DMG400024112	PGSC0003DMT400061957	sense	intergenic	2473	same_strand	downstream
MSTRG.23245.34	StLNC1200	PGSC0003DMG400021603	PGSC0003DMT400055632	antisense	genic	0	nested	exonic
MSTRG.4882.1	StLNC1201	PGSC0003DMG400028451	PGSC0003DMT400073221	sense	intergenic	49408	same_strand	downstream
MSTRG.2256.3	StLNC1202	PGSC0003DMG400000099	PGSC0003DMT400000295	sense	intergenic	296	same_strand	upstream
MSTRG.23245.77	StLNC1203	PGSC0003DMG400021603	PGSC0003DMT400055632	antisense	genic	0	nested	exonic
MSTRG.11050.1	StLNC1204	PGSC0003DMG400020966	PGSC0003DMT400054060	sense	intergenic	1299	same_strand	upstream
MSTRG.923.1	StLNC1205	PGSC0003DMG400015973	PGSC0003DMT400041261	sense	genic	0	containing	intronic
MSTRG.7738.3	StLNC1206	PGSC0003DMG400014323	PGSC0003DMT400037144	antisense	genic	0	overlapping	exonic
MSTRG.2645.1	StLNC1207	PGSC0003DMG400024716	PGSC0003DMT400063575	antisense	genic	0	overlapping	exonic
MSTRG.1203.1	StLNC1208	PGSC0003DMG400042091	PGSC0003DMT400092520	sense	genic	0	containing	intronic
MSTRG.22468.1	StLNC1209	PGSC0003DMG400003823	PGSC0003DMT400009766	sense	intergenic	933	same_strand	downstream
MSTRG.23692.3	StLNC1210	PGSC0003DMG400018886	PGSC0003DMT400048612	sense	intergenic	8490	same_strand	upstream
MSTRG.2490.1	StLNC1211	PGSC0003DMG400022486	PGSC0003DMT400057902	sense	genic	0	containing	intronic
MSTRG.2366.5	StLNC1212	PGSC0003DMG400027505	PGSC0003DMT400070749	sense	intergenic	3785	same_strand	upstream
MSTRG.25183.2	StLNC1213	PGSC0003DMG400035573	PGSC0003DMT400086002	antisense	genic	0	containing	exonic
MSTRG.2796.5	StLNC1214	PGSC0003DMG400018242	PGSC0003DMT400046967	sense	intergenic	284	same_strand	downstream
MSTRG.1048.2	StLNC1215	PGSC0003DMG400045521	PGSC0003DMT400095950	antisense	intergenic	777	divergent	upstream
MSTRG.28296.11	StLNC1216	PGSC0003DMG400021934	PGSC0003DMT400056456	sense	intergenic	30822	same_strand	downstream
MSTRG.23245.12	StLNC1217	PGSC0003DMG400021603	PGSC0003DMT400055632	antisense	genic	0	nested	exonic
MSTRG.25719.4	StLNC1218	PGSC0003DMG400040684	PGSC0003DMT400091113	antisense	genic	0	overlapping	exonic
MSTRG.27374.1	StLNC1219	PGSC0003DMG400015351	PGSC0003DMT400039719	antisense	genic	0	containing	intronic
MSTRG.28168.2	StLNC1220	PGSC0003DMG400005293	PGSC0003DMT400013554	antisense	intergenic	1805	convergent	downstream
MSTRG.19285.1	StLNC1221	PGSC0003DMG400044583	PGSC0003DMT400095012	antisense	intergenic	7156	divergent	upstream
MSTRG.4168.1	StLNC1222	PGSC0003DMG402012010	PGSC0003DMT400031342	antisense	genic	0	nested	exonic
MSTRG.10033.1	StLNC1223	PGSC0003DMG400047168	PGSC0003DMT400097597	antisense	intergenic	3400	divergent	upstream
MSTRG.28964.13	StLNC1224	PGSC0003DMG400011542	PGSC0003DMT400030126	sense	intergenic	1265	same_strand	downstream
MSTRG.9254.2	StLNC1225	PGSC0003DMG400002651	PGSC0003DMT400006828	sense	genic	0	containing	intronic
MSTRG.2516.7	StLNC1226	PGSC0003DMG403028564	PGSC0003DMT400073525	sense	intergenic	4145	same_strand	downstream
MSTRG.14935.5	StLNC1227	PGSC0003DMG400016634	PGSC0003DMT400042900	antisense	genic	0	overlapping	exonic
MSTRG.10486.2	StLNC1228	PGSC0003DMG400044440	PGSC0003DMT400094869	antisense	intergenic	27505	divergent	upstream
MSTRG.4665.6	StLNC1229	PGSC0003DMG400021134	PGSC0003DMT400054452	sense	intergenic	682	same_strand	upstream
MSTRG.19686.2	StLNC1230	PGSC0003DMG401018810	PGSC0003DMT400048422	sense	intergenic	5415	same_strand	upstream
MSTRG.3027.3	StLNC1231	PGSC0003DMG400023776	PGSC0003DMT400061112	antisense	intergenic	2842	divergent	upstream
MSTRG.25407.12	StLNC1232	PGSC0003DMG400036408	PGSC0003DMT400086837	antisense	intergenic	1385	convergent	downstream
MSTRG.23245.38	StLNC1233	PGSC0003DMG400021603	PGSC0003DMT400055632	antisense	genic	0	nested	exonic
MSTRG.21734.1	StLNC1234	PGSC0003DMG400043072	PGSC0003DMT400093501	sense	intergenic	7502	same_strand	upstream
MSTRG.19578.2	StLNC1235	PGSC0003DMG400039583	PGSC0003DMT400090012	antisense	intergenic	5012	convergent	downstream
MSTRG.13363.1	StLNC1236	PGSC0003DMG400014961	PGSC0003DMT400038713	antisense	intergenic	14757	convergent	downstream
MSTRG.17258.47	StLNC1237	PGSC0003DMG400009565	PGSC0003DMT400024747	sense	genic	0	containing	intronic
MSTRG.19501.2	StLNC1238	PGSC0003DMG400013761	PGSC0003DMT400035762	antisense	intergenic	27912	convergent	downstream
MSTRG.19117.1	StLNC1239	PGSC0003DMG400024141	PGSC0003DMT400062036	sense	intergenic	17541	same_strand	downstream
MSTRG.19975.5	StLNC1240	PGSC0003DMG400037004	PGSC0003DMT400087433	antisense	intergenic	4310	convergent	downstream
MSTRG.4766.2	StLNC1241	PGSC0003DMG400008284	PGSC0003DMT400021361	antisense	intergenic	1243	divergent	upstream
MSTRG.13157.2	StLNC1242	PGSC0003DMG400015056	PGSC0003DMT400038931	antisense	genic	0	containing	intronic
MSTRG.750.1	StLNC1243	PGSC0003DMG400045050	PGSC0003DMT400095479	antisense	intergenic	38994	convergent	downstream
MSTRG.22474.1	StLNC1244	PGSC0003DMG400003853	PGSC0003DMT400009835	antisense	genic	0	containing	intronic
MSTRG.26185.1	StLNC1245	PGSC0003DMG400027621	PGSC0003DMT400071021	sense	intergenic	1805	same_strand	downstream
MSTRG.14780.2	StLNC1246	PGSC0003DMG400019018	PGSC0003DMT400048942	sense	intergenic	359	same_strand	upstream
MSTRG.21735.1	StLNC1247	PGSC0003DMG400026650	PGSC0003DMT400068518	antisense	genic	0	overlapping	exonic
MSTRG.12947.1	StLNC1248	PGSC0003DMG400013471	PGSC0003DMT400035026	antisense	intergenic	2839	convergent	downstream
MSTRG.3749.4	StLNC1249	PGSC0003DMG400014669	PGSC0003DMT400038040	sense	intergenic	16528	same_strand	downstream
MSTRG.28317.1	StLNC1250	PGSC0003DMG400037164	PGSC0003DMT400087593	antisense	intergenic	9833	convergent	downstream
MSTRG.12103.1	StLNC1251	PGSC0003DMG400009943	PGSC0003DMT400025756	antisense	intergenic	19224	divergent	upstream
MSTRG.19072.7	StLNC1252	PGSC0003DMG400043722	PGSC0003DMT400094151	antisense	intergenic	19194	divergent	upstream
MSTRG.27078.2	StLNC1253	PGSC0003DMG400018692	PGSC0003DMT400048108	antisense	genic	0	overlapping	exonic
MSTRG.17127.2	StLNC1254	PGSC0003DMG400021028	PGSC0003DMT400054213	antisense	intergenic	13969	divergent	upstream
MSTRG.19610.4	StLNC1255	PGSC0003DMG400043527	PGSC0003DMT400093956	sense	intergenic	15485	same_strand	upstream
MSTRG.1676.1	StLNC1256	PGSC0003DMG400006871	PGSC0003DMT400017716	sense	intergenic	6952	same_strand	downstream
MSTRG.23827.1	StLNC1257	PGSC0003DMG400003245	PGSC0003DMT400008406	sense	intergenic	21583	same_strand	upstream
MSTRG.14566.1	StLNC1258	PGSC0003DMG400012099	PGSC0003DMT400031540	antisense	intergenic	6050	divergent	upstream
MSTRG.2796.9	StLNC1259	PGSC0003DMG400018242	PGSC0003DMT400046967	sense	intergenic	2401	same_strand	downstream
MSTRG.21893.1	StLNC1260	PGSC0003DMG400005415	PGSC0003DMT400013837	antisense	genic	0	overlapping	exonic
MSTRG.7256.5	StLNC1261	PGSC0003DMG400011964	PGSC0003DMT400031233	antisense	intergenic	1752	divergent	upstream
MSTRG.24599.1	StLNC1262	PGSC0003DMG400017587	PGSC0003DMT400045325	antisense	intergenic	3207	divergent	upstream
MSTRG.14875.1	StLNC1263	PGSC0003DMG400029156	PGSC0003DMT400074958	antisense	genic	0	overlapping	exonic
MSTRG.19006.3	StLNC1264	PGSC0003DMG402017090	PGSC0003DMT400044052	antisense	genic	0	overlapping	exonic
MSTRG.19560.2	StLNC1265	PGSC0003DMG400029898	PGSC0003DMT400076868	sense	intergenic	4397	same_strand	downstream
MSTRG.7084.7	StLNC1266	PGSC0003DMG400044276	PGSC0003DMT400094705	sense	genic	0	containing	intronic
MSTRG.21048.1	StLNC1267	PGSC0003DMG400012121	PGSC0003DMT400031593	antisense	intergenic	165	convergent	downstream
MSTRG.23245.18	StLNC1268	PGSC0003DMG400021603	PGSC0003DMT400055632	antisense	genic	0	nested	exonic
MSTRG.11254.15	StLNC1269	PGSC0003DMG400000776	PGSC0003DMT400002035	antisense	genic	0	nested	exonic
MSTRG.28255.1	StLNC1270	PGSC0003DMG400012946	PGSC0003DMT400033700	antisense	intergenic	24710	divergent	upstream
MSTRG.4160.2	StLNC1271	PGSC0003DMG400037317	PGSC0003DMT400087746	sense	genic	0	containing	intronic
MSTRG.26519.1	StLNC1272	PGSC0003DMG400022869	PGSC0003DMT400058866	sense	intergenic	11445	same_strand	upstream
MSTRG.17813.1	StLNC1273	PGSC0003DMG400041066	PGSC0003DMT400091495	sense	intergenic	1781	same_strand	upstream
MSTRG.15635.2	StLNC1274	PGSC0003DMG400033131	PGSC0003DMT400083225	sense	intergenic	33754	same_strand	downstream
MSTRG.7063.5	StLNC1275	PGSC0003DMG400037720	PGSC0003DMT400088149	antisense	genic	0	containing	intronic
MSTRG.2911.1	StLNC1276	PGSC0003DMG400024878	PGSC0003DMT400064005	sense	intergenic	675	same_strand	upstream
MSTRG.23880.1	StLNC1277	PGSC0003DMG400036134	PGSC0003DMT400086563	antisense	intergenic	17540	convergent	downstream
MSTRG.24064.1	StLNC1278	PGSC0003DMG400025406	PGSC0003DMT400065363	antisense	intergenic	435	convergent	downstream
MSTRG.26301.3	StLNC1279	PGSC0003DMG400012063	PGSC0003DMT400031457	antisense	intergenic	18436	divergent	upstream
MSTRG.11254.17	StLNC1280	PGSC0003DMG400000777	PGSC0003DMT400002036	antisense	genic	0	overlapping	exonic
MSTRG.14510.1	StLNC1281	PGSC0003DMG400009680	PGSC0003DMT400025065	antisense	intergenic	16252	divergent	upstream
MSTRG.5390.1	StLNC1282	PGSC0003DMG400019724	PGSC0003DMT400050783	antisense	intergenic	7766	divergent	upstream
MSTRG.27351.7	StLNC1283	PGSC0003DMG400015364	PGSC0003DMT400039755	antisense	genic	0	nested	exonic
MSTRG.11279.5	StLNC1284	PGSC0003DMG400008615	PGSC0003DMT400022199	sense	intergenic	1188	same_strand	downstream
MSTRG.12976.1	StLNC1285	PGSC0003DMG400013487	PGSC0003DMT400035083	sense	genic	0	containing	intronic
MSTRG.27146.5	StLNC1286	PGSC0003DMG401002977	PGSC0003DMT400007696	sense	genic	0	containing	intronic
MSTRG.12100.2	StLNC1287	PGSC0003DMG400009942	PGSC0003DMT400025748	antisense	genic	0	containing	intronic
MSTRG.12389.1	StLNC1288	PGSC0003DMG400019651	PGSC0003DMT400050565	antisense	intergenic	3453	divergent	upstream
MSTRG.22795.1	StLNC1289	PGSC0003DMG400006090	PGSC0003DMT400015598	sense	intergenic	9133	same_strand	downstream
MSTRG.23913.2	StLNC1290	PGSC0003DMG400018983	PGSC0003DMT400048853	antisense	genic	0	containing	intronic
MSTRG.28296.42	StLNC1291	PGSC0003DMG400014999	PGSC0003DMT400038813	antisense	intergenic	86981	convergent	downstream
MSTRG.4104.1	StLNC1292	PGSC0003DMG400041267	PGSC0003DMT400091696	antisense	intergenic	23	convergent	downstream
MSTRG.24667.2	StLNC1293	PGSC0003DMG400008393	PGSC0003DMT400021631	sense	intergenic	233	same_strand	downstream
MSTRG.1151.5	StLNC1294	PGSC0003DMG403004220	PGSC0003DMT400010803	sense	intergenic	1911	same_strand	upstream
MSTRG.3055.1	StLNC1295	PGSC0003DMG400029753	PGSC0003DMT400076528	antisense	genic	0	overlapping	exonic
MSTRG.10662.1	StLNC1296	PGSC0003DMG400039108	PGSC0003DMT400089537	antisense	intergenic	56433	convergent	downstream
MSTRG.19475.1	StLNC1297	PGSC0003DMG400038240	PGSC0003DMT400088669	antisense	intergenic	12884	convergent	downstream
MSTRG.16979.2	StLNC1298	PGSC0003DMG402018748	PGSC0003DMT400048258	antisense	intergenic	6424	convergent	downstream
MSTRG.1090.1	StLNC1299	PGSC0003DMG400005303	PGSC0003DMT400013577	sense	intergenic	138	same_strand	upstream
MSTRG.15674.1	StLNC1300	PGSC0003DMG400026506	PGSC0003DMT400068155	sense	intergenic	6611	same_strand	upstream
MSTRG.21937.1	StLNC1301	PGSC0003DMG400009787	PGSC0003DMT400025349	antisense	intergenic	13209	divergent	upstream
MSTRG.26398.21	StLNC1302	PGSC0003DMG400036515	PGSC0003DMT400086944	antisense	intergenic	72585	convergent	downstream
MSTRG.13037.1	StLNC1303	PGSC0003DMG400018616	PGSC0003DMT400047899	sense	intergenic	30232	same_strand	upstream
MSTRG.7141.1	StLNC1304	PGSC0003DMG400001108	PGSC0003DMT400002837	antisense	intergenic	3136	divergent	upstream
MSTRG.17336.3	StLNC1305	PGSC0003DMG400022092	PGSC0003DMT400056808	sense	intergenic	9383	same_strand	upstream
MSTRG.19273.1	StLNC1306	PGSC0003DMG400005866	PGSC0003DMT400015028	antisense	intergenic	12245	convergent	downstream
MSTRG.24182.2	StLNC1307	PGSC0003DMG400042565	PGSC0003DMT400092994	antisense	intergenic	1196	divergent	upstream
MSTRG.15030.1	StLNC1308	PGSC0003DMG400025279	PGSC0003DMT400065060	sense	intergenic	9108	same_strand	upstream
MSTRG.28296.6	StLNC1309	PGSC0003DMG400021934	PGSC0003DMT400056456	sense	intergenic	29213	same_strand	downstream
MSTRG.900.1	StLNC1310	PGSC0003DMG400010936	PGSC0003DMT400028377	antisense	intergenic	45	convergent	downstream
MSTRG.6105.1	StLNC1311	PGSC0003DMG400010069	PGSC0003DMT400026113	antisense	intergenic	466	convergent	downstream
MSTRG.22819.2	StLNC1312	PGSC0003DMG401017193	PGSC0003DMT400044270	antisense	intergenic	30270	convergent	downstream
MSTRG.5405.6	StLNC1313	PGSC0003DMG400025596	PGSC0003DMT400065755	sense	intergenic	732	same_strand	downstream
MSTRG.28383.1	StLNC1314	PGSC0003DMG400044622	PGSC0003DMT400095051	antisense	intergenic	13819	convergent	downstream
MSTRG.10652.1	StLNC1315	PGSC0003DMG400038483	PGSC0003DMT400088912	sense	intergenic	14767	same_strand	upstream
MSTRG.12467.4	StLNC1316	PGSC0003DMG402000817	PGSC0003DMT400002142	antisense	genic	0	containing	exonic
MSTRG.1161.1	StLNC1317	PGSC0003DMG400042898	PGSC0003DMT400093327	sense	intergenic	756	same_strand	downstream
MSTRG.3483.17	StLNC1318	PGSC0003DMG400025186	PGSC0003DMT400064863	antisense	intergenic	320	convergent	downstream
MSTRG.23723.1	StLNC1319	PGSC0003DMG400019400	PGSC0003DMT400049919	sense	intergenic	596	same_strand	downstream
MSTRG.1657.19	StLNC1320	PGSC0003DMG400006794	PGSC0003DMT400017493	sense	intergenic	2225	same_strand	downstream
MSTRG.11071.1	StLNC1321	PGSC0003DMG400019704	PGSC0003DMT400050741	sense	intergenic	3503	same_strand	upstream
MSTRG.4573.2	StLNC1322	PGSC0003DMG400010438	PGSC0003DMT400027064	antisense	genic	0	overlapping	exonic
MSTRG.17414.2	StLNC1323	PGSC0003DMG400037042	PGSC0003DMT400087471	antisense	intergenic	15405	convergent	downstream
MSTRG.23245.89	StLNC1324	PGSC0003DMG400021603	PGSC0003DMT400055632	antisense	genic	0	nested	exonic
MSTRG.29283.2	StLNC1325	PGSC0003DMG400004663	PGSC0003DMT400011873	sense	intergenic	8871	same_strand	upstream
MSTRG.21430.1	StLNC1326	PGSC0003DMG400002732	PGSC0003DMT400007071	antisense	intergenic	11156	divergent	upstream
MSTRG.19651.1	StLNC1327	PGSC0003DMG400044884	PGSC0003DMT400095313	antisense	genic	0	overlapping	exonic
MSTRG.21873.2	StLNC1328	PGSC0003DMG400042811	PGSC0003DMT400093240	sense	intergenic	2970	same_strand	upstream
MSTRG.15653.2	StLNC1329	PGSC0003DMG400033146	PGSC0003DMT400083260	sense	intergenic	248	same_strand	upstream
MSTRG.9686.1	StLNC1330	PGSC0003DMG401029469	PGSC0003DMT400075792	antisense	genic	0	nested	exonic
MSTRG.3811.1	StLNC1331	PGSC0003DMG400036329	PGSC0003DMT400086758	antisense	intergenic	1135	divergent	upstream
MSTRG.19953.2	StLNC1332	PGSC0003DMG400042128	PGSC0003DMT400092557	antisense	genic	0	overlapping	exonic
MSTRG.8803.2	StLNC1333	PGSC0003DMG400024665	PGSC0003DMT400063408	sense	intergenic	2078	same_strand	upstream
MSTRG.87.1	StLNC1334	PGSC0003DMG400032127	PGSC0003DMT400081823	antisense	intergenic	10545	divergent	upstream
MSTRG.16536.1	StLNC1335	PGSC0003DMG400030369	PGSC0003DMT400078075	antisense	intergenic	595	convergent	downstream
MSTRG.17318.2	StLNC1336	PGSC0003DMG400013784	PGSC0003DMT400035812	antisense	genic	0	overlapping	intronic
MSTRG.26301.5	StLNC1337	PGSC0003DMG400012063	PGSC0003DMT400031457	antisense	intergenic	18444	divergent	upstream
MSTRG.11106.1	StLNC1338	PGSC0003DMG400025322	PGSC0003DMT400065151	sense	intergenic	6321	same_strand	upstream
MSTRG.10646.1	StLNC1339	PGSC0003DMG400037371	PGSC0003DMT400087800	antisense	genic	0	containing	intronic
MSTRG.28320.3	StLNC1340	PGSC0003DMG400002364	PGSC0003DMT400006086	antisense	genic	0	nested	exonic
MSTRG.11357.9	StLNC1341	PGSC0003DMG400031141	PGSC0003DMT400079981	sense	intergenic	2173	same_strand	downstream
MSTRG.24696.16	StLNC1342	PGSC0003DMG400011128	PGSC0003DMT400028911	sense	genic	0	containing	intronic
MSTRG.17842.2	StLNC1343	PGSC0003DMG401017409	PGSC0003DMT400044866	antisense	intergenic	17	convergent	downstream
MSTRG.23360.5	StLNC1344	PGSC0003DMG400014385	PGSC0003DMT400037284	antisense	genic	0	containing	intronic
MSTRG.8188.1	StLNC1345	PGSC0003DMG400019858	PGSC0003DMT400051126	antisense	intergenic	2090	divergent	upstream
MSTRG.12209.2	StLNC1346	PGSC0003DMG402009997	PGSC0003DMT400025891	antisense	intergenic	138	divergent	upstream
MSTRG.14739.4	StLNC1347	PGSC0003DMG401006684	PGSC0003DMT400017134	antisense	genic	0	overlapping	exonic
MSTRG.17051.1	StLNC1348	PGSC0003DMG400006705	PGSC0003DMT400017187	antisense	intergenic	987	convergent	downstream
MSTRG.22963.1	StLNC1349	PGSC0003DMG400001495	PGSC0003DMT400003777	antisense	genic	0	overlapping	exonic
MSTRG.4878.1	StLNC1350	PGSC0003DMG400028407	PGSC0003DMT400073031	antisense	intergenic	25752	convergent	downstream
MSTRG.28296.53	StLNC1351	PGSC0003DMG400014999	PGSC0003DMT400038813	antisense	intergenic	73268	convergent	downstream
MSTRG.5326.1	StLNC1352	PGSC0003DMG400016446	PGSC0003DMT400042414	sense	intergenic	18136	same_strand	upstream
MSTRG.13157.4	StLNC1353	PGSC0003DMG400015056	PGSC0003DMT400038931	antisense	genic	0	containing	intronic
MSTRG.10832.2	StLNC1354	PGSC0003DMG400010528	PGSC0003DMT400027299	sense	intergenic	21055	same_strand	upstream
MSTRG.19487.1	StLNC1355	PGSC0003DMG400015854	PGSC0003DMT400040979	antisense	intergenic	8374	divergent	upstream
MSTRG.2001.6	StLNC1356	PGSC0003DMG400026014	PGSC0003DMT400066917	sense	intergenic	328	same_strand	downstream
MSTRG.864.4	StLNC1357	PGSC0003DMG400039767	PGSC0003DMT400090196	sense	intergenic	27070	same_strand	upstream
MSTRG.8271.1	StLNC1358	PGSC0003DMG400010145	PGSC0003DMT400026288	antisense	genic	0	containing	exonic
MSTRG.23314.3	StLNC1359	PGSC0003DMG400040086	PGSC0003DMT400090515	antisense	intergenic	1587	convergent	downstream
MSTRG.19397.1	StLNC1360	PGSC0003DMG400030150	PGSC0003DMT400077533	sense	intergenic	573	same_strand	upstream
MSTRG.25780.1	StLNC1361	PGSC0003DMG401023974	PGSC0003DMT400061585	sense	intergenic	9104	same_strand	upstream
MSTRG.23938.1	StLNC1362	PGSC0003DMG400039878	PGSC0003DMT400090307	antisense	intergenic	35450	convergent	downstream
MSTRG.18850.2	StLNC1363	PGSC0003DMG400022239	PGSC0003DMT400057255	antisense	intergenic	2746	convergent	downstream
MSTRG.14707.2	StLNC1364	PGSC0003DMG400015842	PGSC0003DMT400040952	sense	intergenic	12086	same_strand	upstream
MSTRG.13518.1	StLNC1365	PGSC0003DMG400003356	PGSC0003DMT400008658	sense	intergenic	14518	same_strand	downstream
MSTRG.19488.1	StLNC1366	PGSC0003DMG400015854	PGSC0003DMT400040979	sense	intergenic	1882	same_strand	upstream
MSTRG.23245.55	StLNC1367	PGSC0003DMG400021603	PGSC0003DMT400055632	antisense	genic	0	nested	exonic
MSTRG.22209.3	StLNC1368	PGSC0003DMG400037372	PGSC0003DMT400087801	sense	intergenic	4102	same_strand	downstream
MSTRG.19470.1	StLNC1369	PGSC0003DMG400019052	PGSC0003DMT400049021	sense	intergenic	33537	same_strand	upstream
MSTRG.29317.135	StLNC1370	PGSC0003DMG400004677	PGSC0003DMT400011911	sense	intergenic	9554	same_strand	upstream
MSTRG.25013.2	StLNC1371	PGSC0003DMG400028110	PGSC0003DMT400072230	sense	intergenic	3517	same_strand	downstream
MSTRG.336.1	StLNC1372	PGSC0003DMG400045844	PGSC0003DMT400096273	antisense	intergenic	5146	divergent	upstream
MSTRG.13464.1	StLNC1373	PGSC0003DMG400023036	PGSC0003DMT400059287	antisense	intergenic	6935	divergent	upstream
MSTRG.23245.79	StLNC1374	PGSC0003DMG400021603	PGSC0003DMT400055632	antisense	genic	0	nested	exonic
MSTRG.4062.1	StLNC1375	PGSC0003DMG400017870	PGSC0003DMT400046054	antisense	intergenic	1852	convergent	downstream
MSTRG.7062.7	StLNC1376	PGSC0003DMG400046276	PGSC0003DMT400096705	antisense	genic	0	overlapping	exonic
MSTRG.23753.2	StLNC1377	PGSC0003DMG400019414	PGSC0003DMT400049954	antisense	intergenic	425	convergent	downstream
MSTRG.7124.3	StLNC1378	PGSC0003DMG400008719	PGSC0003DMT400022502	sense	intergenic	38028	same_strand	upstream
MSTRG.789.5	StLNC1379	PGSC0003DMG400036483	PGSC0003DMT400086912	antisense	intergenic	5505	convergent	downstream
MSTRG.28277.2	StLNC1380	PGSC0003DMG400016754	PGSC0003DMT400043177	antisense	intergenic	8656	divergent	upstream
MSTRG.21540.1	StLNC1381	PGSC0003DMG400001752	PGSC0003DMT400004399	antisense	genic	0	overlapping	exonic
MSTRG.13993.1	StLNC1382	PGSC0003DMG402023438	PGSC0003DMT400060252	antisense	genic	0	overlapping	exonic
MSTRG.2090.1	StLNC1383	PGSC0003DMG400000134	PGSC0003DMT400000380	antisense	intergenic	283	convergent	downstream
MSTRG.10686.3	StLNC1384	PGSC0003DMG400035656	PGSC0003DMT400086085	sense	intergenic	48316	same_strand	upstream
MSTRG.10461.1	StLNC1385	PGSC0003DMG400032531	PGSC0003DMT400082412	sense	intergenic	8275	same_strand	downstream
MSTRG.5842.4	StLNC1386	PGSC0003DMG400030635	PGSC0003DMT400078745	sense	intergenic	3687	same_strand	upstream
MSTRG.23245.41	StLNC1387	PGSC0003DMG400021603	PGSC0003DMT400055632	antisense	genic	0	nested	exonic
MSTRG.24356.3	StLNC1388	PGSC0003DMG400040131	PGSC0003DMT400090560	antisense	genic	0	overlapping	exonic
MSTRG.17258.35	StLNC1389	PGSC0003DMG400009565	PGSC0003DMT400024747	sense	genic	0	containing	intronic
MSTRG.1508.1	StLNC1390	PGSC0003DMG400005209	PGSC0003DMT400013356	antisense	intergenic	5846	divergent	upstream
MSTRG.18059.7	StLNC1391	PGSC0003DMG400026195	PGSC0003DMT400067383	sense	genic	0	containing	intronic
MSTRG.14913.6	StLNC1392	PGSC0003DMG400038944	PGSC0003DMT400089373	antisense	intergenic	2598	divergent	upstream
MSTRG.12332.1	StLNC1393	PGSC0003DMG400028360	PGSC0003DMT400072893	antisense	intergenic	6674	divergent	upstream
MSTRG.11254.29	StLNC1394	PGSC0003DMG400000777	PGSC0003DMT400002036	antisense	genic	0	overlapping	exonic
MSTRG.28991.1	StLNC1395	PGSC0003DMG400015429	PGSC0003DMT400039889	sense	intergenic	2906	same_strand	downstream
MSTRG.9533.2	StLNC1396	PGSC0003DMG400002830	PGSC0003DMT400007358	antisense	intergenic	4633	divergent	upstream
MSTRG.26381.2	StLNC1397	PGSC0003DMG400012074	PGSC0003DMT400031492	antisense	genic	0	overlapping	exonic
MSTRG.17258.44	StLNC1398	PGSC0003DMG400009565	PGSC0003DMT400024747	sense	genic	0	containing	intronic
MSTRG.6925.1	StLNC1399	PGSC0003DMG402016693	PGSC0003DMT400043047	sense	intergenic	13072	same_strand	downstream
MSTRG.13303.1	StLNC1400	PGSC0003DMG400009808	PGSC0003DMT400025403	sense	intergenic	2158	same_strand	downstream
MSTRG.875.1	StLNC1401	PGSC0003DMG400008610	PGSC0003DMT400022189	antisense	intergenic	4870	divergent	upstream
MSTRG.28296.38	StLNC1402	PGSC0003DMG400014999	PGSC0003DMT400038813	antisense	intergenic	92651	convergent	downstream
MSTRG.27351.8	StLNC1403	PGSC0003DMG400015364	PGSC0003DMT400039755	antisense	genic	0	nested	exonic
MSTRG.17380.1	StLNC1404	PGSC0003DMG400045267	PGSC0003DMT400095696	antisense	intergenic	8011	convergent	downstream
MSTRG.22533.2	StLNC1405	PGSC0003DMG400031864	PGSC0003DMT400081468	sense	intergenic	22240	same_strand	upstream
MSTRG.2502.4	StLNC1406	PGSC0003DMG400028591	PGSC0003DMT400073599	sense	intergenic	1782	same_strand	downstream
MSTRG.20113.1	StLNC1407	PGSC0003DMG400014782	PGSC0003DMT400038307	sense	intergenic	2010	same_strand	upstream
MSTRG.1243.44	StLNC1408	PGSC0003DMG400022660	PGSC0003DMT400058344	antisense	intergenic	8202	convergent	downstream
MSTRG.14431.5	StLNC1409	PGSC0003DMG400020553	PGSC0003DMT400052964	sense	intergenic	3359	same_strand	downstream
MSTRG.84.1	StLNC1410	PGSC0003DMG400032127	PGSC0003DMT400081823	antisense	intergenic	37744	divergent	upstream
MSTRG.14630.5	StLNC1411	PGSC0003DMG400002427	PGSC0003DMT400006232	sense	intergenic	715	same_strand	downstream
MSTRG.8541.1	StLNC1412	PGSC0003DMG400018090	PGSC0003DMT400046598	antisense	intergenic	12849	divergent	upstream
MSTRG.8040.1	StLNC1413	PGSC0003DMG400000591	PGSC0003DMT400001592	sense	intergenic	5908	same_strand	upstream
MSTRG.15750.1	StLNC1414	PGSC0003DMG402004840	PGSC0003DMT400012353	sense	intergenic	830	same_strand	downstream
MSTRG.1243.31	StLNC1415	PGSC0003DMG400046162	PGSC0003DMT400096591	antisense	genic	0	containing	intronic
MSTRG.5055.1	StLNC1416	PGSC0003DMG400031748	PGSC0003DMT400081218	antisense	intergenic	888	convergent	downstream
MSTRG.12953.10	StLNC1417	PGSC0003DMG400013473	PGSC0003DMT400035030	antisense	genic	0	overlapping	exonic
MSTRG.18059.5	StLNC1418	PGSC0003DMG400026195	PGSC0003DMT400067383	sense	genic	0	containing	intronic
MSTRG.17964.2	StLNC1419	PGSC0003DMG400000679	PGSC0003DMT400001814	sense	intergenic	6251	same_strand	downstream
MSTRG.23245.1	StLNC1420	PGSC0003DMG400021603	PGSC0003DMT400055632	antisense	genic	0	nested	exonic
MSTRG.24487.1	StLNC1421	PGSC0003DMG400019118	PGSC0003DMT400049190	antisense	genic	0	overlapping	exonic
MSTRG.28168.8	StLNC1422	PGSC0003DMG400005293	PGSC0003DMT400013554	antisense	intergenic	1984	convergent	downstream
MSTRG.28313.2	StLNC1423	PGSC0003DMG400035822	PGSC0003DMT400086251	sense	intergenic	6421	same_strand	downstream
MSTRG.12440.2	StLNC1424	PGSC0003DMG400025109	PGSC0003DMT400064623	sense	intergenic	10209	same_strand	downstream
MSTRG.28650.3	StLNC1425	PGSC0003DMG400026452	PGSC0003DMT400068012	sense	intergenic	18683	same_strand	upstream
MSTRG.21529.1	StLNC1426	PGSC0003DMG401020908	PGSC0003DMT400053881	antisense	genic	0	nested	exonic
MSTRG.6276.3	StLNC1427	PGSC0003DMG400001340	PGSC0003DMT400003384	antisense	intergenic	289	convergent	downstream
MSTRG.7050.1	StLNC1428	PGSC0003DMG400019040	PGSC0003DMT400049000	sense	genic	0	containing	intronic
MSTRG.26589.2	StLNC1429	PGSC0003DMG400034873	PGSC0003DMT400085302	antisense	intergenic	41357	convergent	downstream
MSTRG.11157.1	StLNC1430	PGSC0003DMG400002385	PGSC0003DMT400006130	antisense	intergenic	4169	divergent	upstream
MSTRG.5640.1	StLNC1431	PGSC0003DMG400003627	PGSC0003DMT400009331	sense	intergenic	5765	same_strand	upstream
MSTRG.2645.2	StLNC1432	PGSC0003DMG400024716	PGSC0003DMT400063575	antisense	genic	0	overlapping	exonic
MSTRG.28277.5	StLNC1433	PGSC0003DMG400016754	PGSC0003DMT400043177	antisense	intergenic	8743	divergent	upstream
MSTRG.19162.1	StLNC1434	PGSC0003DMG400018498	PGSC0003DMT400047596	antisense	genic	0	nested	exonic
MSTRG.10696.3	StLNC1435	PGSC0003DMG400047157	PGSC0003DMT400097586	antisense	genic	0	containing	intronic
MSTRG.23216.6	StLNC1436	PGSC0003DMG400011904	PGSC0003DMT400031072	antisense	genic	0	nested	intronic
MSTRG.5831.1	StLNC1437	PGSC0003DMG400030668	PGSC0003DMT400078811	sense	intergenic	4917	same_strand	downstream
MSTRG.19392.1	StLNC1438	PGSC0003DMG400043045	PGSC0003DMT400093474	antisense	intergenic	5898	divergent	upstream
MSTRG.22111.1	StLNC1439	PGSC0003DMG400045752	PGSC0003DMT400096181	antisense	intergenic	4522	convergent	downstream
MSTRG.22457.1	StLNC1440	PGSC0003DMG400024287	PGSC0003DMT400062410	antisense	genic	0	overlapping	exonic
MSTRG.14965.1	StLNC1441	PGSC0003DMG400006642	PGSC0003DMT400017000	antisense	genic	0	overlapping	exonic
MSTRG.21293.2	StLNC1442	PGSC0003DMG400008942	PGSC0003DMT400023090	sense	intergenic	1259	same_strand	downstream
MSTRG.20219.1	StLNC1443	PGSC0003DMG400015710	PGSC0003DMT400040632	sense	intergenic	2254	same_strand	upstream
MSTRG.2614.1	StLNC1444	PGSC0003DMG400024788	PGSC0003DMT400063780	sense	genic	0	containing	intronic
MSTRG.25407.4	StLNC1445	PGSC0003DMG400036408	PGSC0003DMT400086837	antisense	intergenic	1384	convergent	downstream
MSTRG.28369.2	StLNC1446	PGSC0003DMG400039445	PGSC0003DMT400089874	antisense	genic	0	containing	intronic
MSTRG.3774.10	StLNC1447	PGSC0003DMG400042313	PGSC0003DMT400092742	antisense	genic	0	containing	intronic
MSTRG.21009.1	StLNC1448	PGSC0003DMG400012261	PGSC0003DMT400031965	antisense	intergenic	5159	convergent	downstream
MSTRG.20402.6	StLNC1449	PGSC0003DMG400002399	PGSC0003DMT400006170	antisense	intergenic	2898	divergent	upstream
MSTRG.28734.1	StLNC1450	PGSC0003DMG400028856	PGSC0003DMT400074261	sense	intergenic	7655	same_strand	upstream
MSTRG.7492.1	StLNC1451	PGSC0003DMG400005260	PGSC0003DMT400013484	antisense	genic	0	overlapping	exonic
MSTRG.18897.4	StLNC1452	PGSC0003DMG400038517	PGSC0003DMT400088946	sense	intergenic	4694	same_strand	upstream
MSTRG.16725.2	StLNC1453	PGSC0003DMG400020122	PGSC0003DMT400051852	antisense	intergenic	1387	divergent	upstream
MSTRG.11117.1	StLNC1454	PGSC0003DMG400025319	PGSC0003DMT400065148	antisense	intergenic	2562	convergent	downstream
MSTRG.5268.1	StLNC1455	PGSC0003DMG400002090	PGSC0003DMT400005354	sense	intergenic	49076	same_strand	downstream
MSTRG.27582.1	StLNC1456	PGSC0003DMG400002908	PGSC0003DMT400007529	antisense	genic	0	overlapping	exonic
MSTRG.4798.1	StLNC1457	PGSC0003DMG400008301	PGSC0003DMT400021392	antisense	genic	0	overlapping	exonic
MSTRG.10629.1	StLNC1458	PGSC0003DMG400036590	PGSC0003DMT400087019	sense	intergenic	71998	same_strand	downstream
MSTRG.1243.47	StLNC1459	PGSC0003DMG400022660	PGSC0003DMT400058344	antisense	intergenic	9060	convergent	downstream
MSTRG.16906.1	StLNC1460	PGSC0003DMG401011220	PGSC0003DMT400029176	antisense	intergenic	4341	divergent	upstream
MSTRG.24287.1	StLNC1461	PGSC0003DMG400040052	PGSC0003DMT400090481	antisense	intergenic	11111	divergent	upstream
MSTRG.24178.2	StLNC1462	PGSC0003DMG402014048	PGSC0003DMT400036477	antisense	genic	0	nested	exonic
MSTRG.11254.64	StLNC1463	PGSC0003DMG400000783	PGSC0003DMT400002054	antisense	genic	0	nested	exonic
MSTRG.1015.1	StLNC1464	PGSC0003DMG400026698	PGSC0003DMT400068662	sense	intergenic	15405	same_strand	upstream
MSTRG.17258.37	StLNC1465	PGSC0003DMG400009565	PGSC0003DMT400024747	sense	genic	0	containing	intronic
MSTRG.14760.2	StLNC1466	PGSC0003DMG400043013	PGSC0003DMT400093442	antisense	intergenic	42017	divergent	upstream
MSTRG.4976.1	StLNC1467	PGSC0003DMG400010215	PGSC0003DMT400026464	sense	intergenic	6070	same_strand	downstream
MSTRG.7848.2	StLNC1468	PGSC0003DMG400009511	PGSC0003DMT400024598	antisense	genic	0	overlapping	exonic
MSTRG.3483.14	StLNC1469	PGSC0003DMG400025186	PGSC0003DMT400064863	antisense	intergenic	286	convergent	downstream
MSTRG.27421.1	StLNC1470	PGSC0003DMG401007845	PGSC0003DMT400020288	sense	intergenic	99	same_strand	upstream
MSTRG.900.10	StLNC1471	PGSC0003DMG400010936	PGSC0003DMT400028377	antisense	intergenic	1566	convergent	downstream
MSTRG.82.1	StLNC1472	PGSC0003DMG400032127	PGSC0003DMT400081823	antisense	intergenic	33653	divergent	upstream
MSTRG.2456.27	StLNC1473	PGSC0003DMG400022520	PGSC0003DMT400058008	sense	intergenic	7540	same_strand	downstream
MSTRG.13104.3	StLNC1474	PGSC0003DMG400011978	PGSC0003DMT400031254	sense	intergenic	5757	same_strand	upstream
MSTRG.23245.22	StLNC1475	PGSC0003DMG400021603	PGSC0003DMT400055632	antisense	genic	0	nested	exonic
MSTRG.17318.3	StLNC1476	PGSC0003DMG400013784	PGSC0003DMT400035812	antisense	intergenic	8429	convergent	downstream
MSTRG.5676.1	StLNC1477	PGSC0003DMG400003612	PGSC0003DMT400009303	sense	intergenic	18836	same_strand	upstream
MSTRG.24117.9	StLNC1478	PGSC0003DMG400043806	PGSC0003DMT400094235	sense	intergenic	54358	same_strand	upstream
MSTRG.19692.3	StLNC1479	PGSC0003DMG400037946	PGSC0003DMT400088375	antisense	genic	0	overlapping	intronic
MSTRG.11050.2	StLNC1480	PGSC0003DMG400020966	PGSC0003DMT400054060	sense	intergenic	2845	same_strand	upstream
MSTRG.5640.2	StLNC1481	PGSC0003DMG400003627	PGSC0003DMT400009331	sense	intergenic	5787	same_strand	upstream
MSTRG.18394.1	StLNC1482	PGSC0003DMG400027653	PGSC0003DMT400071114	sense	intergenic	4305	same_strand	downstream
MSTRG.28569.1	StLNC1483	PGSC0003DMG400014470	PGSC0003DMT400037507	antisense	genic	0	overlapping	exonic
MSTRG.4180.4	StLNC1484	PGSC0003DMG400015511	PGSC0003DMT400040097	sense	intergenic	642	same_strand	upstream
MSTRG.23790.1	StLNC1485	PGSC0003DMG400023097	PGSC0003DMT400059447	antisense	genic	0	overlapping	exonic
MSTRG.736.1	StLNC1486	PGSC0003DMG400039218	PGSC0003DMT400089647	sense	intergenic	6132	same_strand	downstream
MSTRG.17542.1	StLNC1487	PGSC0003DMG400044834	PGSC0003DMT400095263	sense	intergenic	3826	same_strand	downstream
MSTRG.11702.2	StLNC1488	PGSC0003DMG400043403	PGSC0003DMT400093832	antisense	intergenic	3293	convergent	downstream
MSTRG.26563.1	StLNC1489	PGSC0003DMG400043682	PGSC0003DMT400094111	sense	intergenic	3606	same_strand	upstream
MSTRG.9533.4	StLNC1490	PGSC0003DMG400002830	PGSC0003DMT400007358	antisense	intergenic	4632	divergent	upstream
MSTRG.2502.2	StLNC1491	PGSC0003DMG400028591	PGSC0003DMT400073599	sense	intergenic	1801	same_strand	downstream
MSTRG.7749.3	StLNC1492	PGSC0003DMG400014329	PGSC0003DMT400037162	sense	intergenic	13291	same_strand	upstream
MSTRG.27066.1	StLNC1493	PGSC0003DMG400018572	PGSC0003DMT400047775	sense	intergenic	2190	same_strand	upstream
MSTRG.10375.2	StLNC1494	PGSC0003DMG400003246	PGSC0003DMT400008407	antisense	genic	0	containing	intronic
MSTRG.2645.5	StLNC1495	PGSC0003DMG400024716	PGSC0003DMT400063575	antisense	genic	0	overlapping	exonic
MSTRG.11256.8	StLNC1496	PGSC0003DMG400000794	PGSC0003DMT400002085	antisense	genic	0	overlapping	exonic
MSTRG.3774.8	StLNC1497	PGSC0003DMG400042313	PGSC0003DMT400092742	antisense	genic	0	containing	intronic
MSTRG.17398.2	StLNC1498	PGSC0003DMG400013989	PGSC0003DMT400036354	sense	intergenic	63212	same_strand	downstream
MSTRG.24356.2	StLNC1499	PGSC0003DMG400040131	PGSC0003DMT400090560	antisense	genic	0	overlapping	exonic
MSTRG.22965.1	StLNC1500	PGSC0003DMG400001550	PGSC0003DMT400003934	antisense	genic	0	overlapping	exonic
MSTRG.28320.5	StLNC1501	PGSC0003DMG400002364	PGSC0003DMT400006086	antisense	genic	0	nested	exonic
MSTRG.27162.1	StLNC1502	PGSC0003DMG400027391	PGSC0003DMT400070451	antisense	genic	0	overlapping	exonic
MSTRG.10686.7	StLNC1503	PGSC0003DMG400035656	PGSC0003DMT400086085	sense	intergenic	52663	same_strand	upstream
MSTRG.28478.1	StLNC1504	PGSC0003DMG400000656	PGSC0003DMT400001756	sense	intergenic	3464	same_strand	downstream
MSTRG.19922.1	StLNC1505	PGSC0003DMG400029086	PGSC0003DMT400074806	sense	intergenic	12941	same_strand	downstream
MSTRG.7147.4	StLNC1506	PGSC0003DMG400009763	PGSC0003DMT400025276	antisense	intergenic	14171	convergent	downstream
MSTRG.19455.2	StLNC1507	PGSC0003DMG400017885	PGSC0003DMT400046087	sense	intergenic	3801	same_strand	upstream
MSTRG.23775.1	StLNC1508	PGSC0003DMG400037690	PGSC0003DMT400088119	sense	intergenic	22594	same_strand	upstream
MSTRG.10694.2	StLNC1509	PGSC0003DMG400031498	PGSC0003DMT400080879	antisense	intergenic	9599	divergent	upstream
MSTRG.21893.3	StLNC1510	PGSC0003DMG400005415	PGSC0003DMT400013837	antisense	genic	0	overlapping	exonic
MSTRG.2456.26	StLNC1511	PGSC0003DMG400041164	PGSC0003DMT400091593	antisense	intergenic	1499	convergent	downstream
MSTRG.4785.1	StLNC1512	PGSC0003DMG400008293	PGSC0003DMT400021373	sense	intergenic	2663	same_strand	downstream
MSTRG.24696.28	StLNC1513	PGSC0003DMG400011126	PGSC0003DMT400028909	sense	intergenic	5807	same_strand	upstream
MSTRG.27086.1	StLNC1514	PGSC0003DMG400018723	PGSC0003DMT400048203	antisense	intergenic	508	divergent	upstream
MSTRG.19613.4	StLNC1515	PGSC0003DMG400034868	PGSC0003DMT400085297	antisense	intergenic	26654	divergent	upstream
MSTRG.29310.1	StLNC1516	PGSC0003DMG402004586	PGSC0003DMT400011671	sense	intergenic	1473	same_strand	downstream
MSTRG.11254.14	StLNC1517	PGSC0003DMG400000780	PGSC0003DMT400002042	antisense	genic	0	containing	exonic
MSTRG.14268.2	StLNC1518	PGSC0003DMG400021993	PGSC0003DMT400056565	sense	intergenic	1202	same_strand	upstream
MSTRG.10663.1	StLNC1519	PGSC0003DMG400039108	PGSC0003DMT400089537	antisense	intergenic	53398	convergent	downstream
MSTRG.5156.2	StLNC1520	PGSC0003DMG400022418	PGSC0003DMT400057744	antisense	genic	0	overlapping	exonic
MSTRG.15476.1	StLNC1521	PGSC0003DMG400035665	PGSC0003DMT400086094	sense	intergenic	1256	same_strand	downstream
MSTRG.83.2	StLNC1522	PGSC0003DMG400032127	PGSC0003DMT400081823	sense	genic	0	containing	intronic
MSTRG.17515.2	StLNC1523	PGSC0003DMG400016074	PGSC0003DMT400041473	antisense	intergenic	57628	divergent	upstream
MSTRG.11576.2	StLNC1524	PGSC0003DMG400012903	PGSC0003DMT400033597	sense	intergenic	19539	same_strand	upstream
MSTRG.27143.1	StLNC1525	PGSC0003DMG400002982	PGSC0003DMT400007719	sense	genic	0	overlapping	intronic
MSTRG.10324.1	StLNC1526	PGSC0003DMG404012723	PGSC0003DMT400033140	sense	intergenic	2040	same_strand	upstream
MSTRG.1243.43	StLNC1527	PGSC0003DMG400022660	PGSC0003DMT400058344	antisense	intergenic	9058	convergent	downstream
MSTRG.17523.7	StLNC1528	PGSC0003DMG400030289	PGSC0003DMT400077861	sense	intergenic	6705	same_strand	upstream
MSTRG.7848.1	StLNC1529	PGSC0003DMG400009511	PGSC0003DMT400024598	antisense	genic	0	overlapping	exonic
MSTRG.22182.6	StLNC1530	PGSC0003DMG400035185	PGSC0003DMT400085614	sense	intergenic	23794	same_strand	upstream
MSTRG.27115.4	StLNC1531	PGSC0003DMG400002995	PGSC0003DMT400007742	sense	intergenic	4082	same_strand	downstream
MSTRG.13457.1	StLNC1532	PGSC0003DMG400023044	PGSC0003DMT400059307	sense	intergenic	2630	same_strand	upstream
MSTRG.8423.2	StLNC1533	PGSC0003DMG401015159	PGSC0003DMT400039204	sense	intergenic	4999	same_strand	downstream
MSTRG.3492.1	StLNC1534	PGSC0003DMG400025172	PGSC0003DMT400064813	antisense	genic	0	overlapping	exonic
MSTRG.8078.1	StLNC1535	PGSC0003DMG400000534	PGSC0003DMT400001446	antisense	genic	0	overlapping	exonic
MSTRG.22790.1	StLNC1536	PGSC0003DMG400006087	PGSC0003DMT400015591	antisense	genic	0	containing	exonic
MSTRG.26168.1	StLNC1537	PGSC0003DMG400015106	PGSC0003DMT400039065	sense	intergenic	6327	same_strand	upstream
MSTRG.10567.2	StLNC1538	PGSC0003DMG400005359	PGSC0003DMT400013704	antisense	intergenic	28585	divergent	upstream
MSTRG.8270.2	StLNC1539	PGSC0003DMG400010143	PGSC0003DMT400026285	antisense	genic	0	containing	exonic
MSTRG.2321.2	StLNC1540	PGSC0003DMG400000129	PGSC0003DMT400000365	antisense	intergenic	1865	convergent	downstream
MSTRG.11646.2	StLNC1541	PGSC0003DMG400009349	PGSC0003DMT400024193	antisense	genic	0	containing	exonic
MSTRG.5217.1	StLNC1542	PGSC0003DMG400022391	PGSC0003DMT400057672	antisense	genic	0	overlapping	exonic
MSTRG.25123.3	StLNC1543	PGSC0003DMG400029822	PGSC0003DMT400076678	sense	intergenic	77	same_strand	upstream
MSTRG.27207.23	StLNC1544	PGSC0003DMG400030239	PGSC0003DMT400077736	sense	intergenic	1866	same_strand	upstream
MSTRG.18064.2	StLNC1545	PGSC0003DMG400026163	PGSC0003DMT400067285	antisense	intergenic	205	convergent	downstream
MSTRG.26415.5	StLNC1546	PGSC0003DMG400040570	PGSC0003DMT400090999	sense	intergenic	30474	same_strand	downstream
MSTRG.20706.1	StLNC1547	PGSC0003DMG400028054	PGSC0003DMT400072105	sense	intergenic	249	same_strand	downstream
MSTRG.21334.5	StLNC1548	PGSC0003DMG402008964	PGSC0003DMT400023158	sense	intergenic	1785	same_strand	downstream
MSTRG.80.47	StLNC1549	PGSC0003DMG400032127	PGSC0003DMT400081823	sense	intergenic	11362	same_strand	upstream
MSTRG.28296.15	StLNC1550	PGSC0003DMG400021934	PGSC0003DMT400056456	sense	intergenic	30823	same_strand	downstream
MSTRG.28168.9	StLNC1551	PGSC0003DMG400005293	PGSC0003DMT400013554	antisense	intergenic	2076	convergent	downstream
MSTRG.10586.2	StLNC1552	PGSC0003DMG400034669	PGSC0003DMT400085098	sense	intergenic	12077	same_strand	upstream
MSTRG.14812.1	StLNC1553	PGSC0003DMG400015645	PGSC0003DMT400040409	sense	intergenic	3330	same_strand	downstream
MSTRG.29317.151	StLNC1554	PGSC0003DMG400004593	PGSC0003DMT400011693	antisense	intergenic	6579	divergent	upstream
MSTRG.3958.1	StLNC1555	PGSC0003DMG400011809	PGSC0003DMT400030826	sense	intergenic	492	same_strand	downstream
MSTRG.25810.2	StLNC1556	PGSC0003DMG400007606	PGSC0003DMT400019683	sense	genic	0	containing	intronic
MSTRG.19929.1	StLNC1557	PGSC0003DMG400023144	PGSC0003DMT400059566	sense	intergenic	31768	same_strand	upstream
MSTRG.17287.1	StLNC1558	PGSC0003DMG400002301	PGSC0003DMT400005927	antisense	intergenic	62	divergent	upstream
MSTRG.25129.1	StLNC1559	PGSC0003DMG402029824	PGSC0003DMT400076694	sense	intergenic	526	same_strand	downstream
MSTRG.1657.32	StLNC1560	PGSC0003DMG400006794	PGSC0003DMT400017493	sense	intergenic	40441	same_strand	downstream
MSTRG.22173.7	StLNC1561	PGSC0003DMG400043953	PGSC0003DMT400094382	sense	genic	0	containing	intronic
MSTRG.20031.1	StLNC1562	PGSC0003DMG400034395	PGSC0003DMT400084824	antisense	intergenic	7927	divergent	upstream
MSTRG.1245.1	StLNC1563	PGSC0003DMG400046162	PGSC0003DMT400096591	sense	genic	0	containing	intronic
MSTRG.28168.4	StLNC1564	PGSC0003DMG400005293	PGSC0003DMT400013554	antisense	intergenic	1998	convergent	downstream
MSTRG.29313.17	StLNC1565	PGSC0003DMG400004677	PGSC0003DMT400011911	antisense	genic	0	overlapping	exonic
MSTRG.22332.2	StLNC1566	PGSC0003DMG400019348	PGSC0003DMT400049811	antisense	intergenic	297	convergent	downstream
MSTRG.29313.30	StLNC1567	PGSC0003DMG400004676	PGSC0003DMT400011910	antisense	genic	0	containing	exonic
MSTRG.789.4	StLNC1568	PGSC0003DMG400036483	PGSC0003DMT400086912	antisense	intergenic	5346	convergent	downstream
MSTRG.19987.1	StLNC1569	PGSC0003DMG400001265	PGSC0003DMT400003202	antisense	genic	0	overlapping	exonic
MSTRG.21603.3	StLNC1570	PGSC0003DMG400002008	PGSC0003DMT400005076	antisense	intergenic	11531	convergent	downstream
MSTRG.17005.3	StLNC1571	PGSC0003DMG400030748	PGSC0003DMT400079004	sense	intergenic	2746	same_strand	downstream
MSTRG.3774.5	StLNC1572	PGSC0003DMG400042313	PGSC0003DMT400092742	antisense	genic	0	containing	intronic
MSTRG.351.4	StLNC1573	PGSC0003DMG402031484	PGSC0003DMT400080852	sense	intergenic	510	same_strand	upstream
MSTRG.1135.1	StLNC1574	PGSC0003DMG400013124	PGSC0003DMT400034158	sense	intergenic	3148	same_strand	downstream
MSTRG.23245.66	StLNC1575	PGSC0003DMG400021603	PGSC0003DMT400055632	antisense	genic	0	nested	exonic
MSTRG.17398.1	StLNC1576	PGSC0003DMG400013989	PGSC0003DMT400036354	sense	intergenic	63151	same_strand	downstream
MSTRG.29313.16	StLNC1577	PGSC0003DMG400004677	PGSC0003DMT400011911	antisense	genic	0	overlapping	exonic
MSTRG.22957.1	StLNC1578	PGSC0003DMG400001553	PGSC0003DMT400003948	antisense	intergenic	4153	divergent	upstream
MSTRG.11168.4	StLNC1579	PGSC0003DMG400024863	PGSC0003DMT400063966	sense	intergenic	2616	same_strand	upstream
MSTRG.9650.11	StLNC1580	PGSC0003DMG402005959	PGSC0003DMT400015272	sense	intergenic	547	same_strand	upstream
MSTRG.3483.24	StLNC1581	PGSC0003DMG400025186	PGSC0003DMT400064863	antisense	intergenic	288	convergent	downstream
MSTRG.13178.1	StLNC1582	PGSC0003DMG402034311	PGSC0003DMT400084736	sense	intergenic	2990	same_strand	upstream
MSTRG.5266.1	StLNC1583	PGSC0003DMG400021734	PGSC0003DMT400055954	antisense	intergenic	38139	convergent	downstream
MSTRG.22209.1	StLNC1584	PGSC0003DMG400037372	PGSC0003DMT400087801	sense	intergenic	4063	same_strand	downstream
MSTRG.27066.2	StLNC1585	PGSC0003DMG400018572	PGSC0003DMT400047775	sense	intergenic	2233	same_strand	upstream
MSTRG.10761.1	StLNC1586	PGSC0003DMG401010686	PGSC0003DMT400027749	sense	intergenic	3133	same_strand	upstream
MSTRG.27019.12	StLNC1587	PGSC0003DMG400045237	PGSC0003DMT400095666	antisense	genic	0	containing	intronic
MSTRG.23827.4	StLNC1588	PGSC0003DMG400003245	PGSC0003DMT400008406	sense	intergenic	21595	same_strand	upstream
MSTRG.28168.10	StLNC1589	PGSC0003DMG400005293	PGSC0003DMT400013554	antisense	intergenic	2066	convergent	downstream
MSTRG.25332.2	StLNC1590	PGSC0003DMG400013296	PGSC0003DMT400034600	sense	intergenic	5482	same_strand	upstream
MSTRG.27198.1	StLNC1591	PGSC0003DMG400027377	PGSC0003DMT400070419	antisense	genic	0	overlapping	exonic
MSTRG.27501.1	StLNC1592	PGSC0003DMG400007884	PGSC0003DMT400020399	antisense	genic	0	nested	intronic
MSTRG.4996.1	StLNC1593	PGSC0003DMG400010249	PGSC0003DMT400026549	sense	intergenic	15186	same_strand	upstream
MSTRG.24119.3	StLNC1594	PGSC0003DMG400017801	PGSC0003DMT400045890	antisense	genic	0	overlapping	exonic
MSTRG.5512.9	StLNC1595	PGSC0003DMG400001565	PGSC0003DMT400003980	antisense	intergenic	1135	convergent	downstream
MSTRG.5640.3	StLNC1596	PGSC0003DMG400003627	PGSC0003DMT400009331	sense	intergenic	5793	same_strand	upstream
MSTRG.11265.1	StLNC1597	PGSC0003DMG400003477	PGSC0003DMT400008929	sense	intergenic	6200	same_strand	downstream
MSTRG.16802.2	StLNC1598	PGSC0003DMG400003186	PGSC0003DMT400008260	sense	intergenic	2004	same_strand	upstream
MSTRG.28435.1	StLNC1599	PGSC0003DMG401015827	PGSC0003DMT400040919	antisense	intergenic	7902	divergent	upstream
MSTRG.21843.1	StLNC1600	PGSC0003DMG400030270	PGSC0003DMT400077817	sense	intergenic	3589	same_strand	downstream
MSTRG.23216.1	StLNC1601	PGSC0003DMG400011904	PGSC0003DMT400031072	antisense	genic	0	nested	intronic
MSTRG.15303.1	StLNC1602	PGSC0003DMG400009831	PGSC0003DMT400025466	antisense	intergenic	13312	convergent	downstream
MSTRG.9202.2	StLNC1603	PGSC0003DMG400005694	PGSC0003DMT400014547	antisense	intergenic	372	convergent	downstream
MSTRG.3719.1	StLNC1604	PGSC0003DMG400014672	PGSC0003DMT400038054	antisense	intergenic	1749	divergent	upstream
MSTRG.26799.2	StLNC1605	PGSC0003DMG400000425	PGSC0003DMT400001124	sense	intergenic	11373	same_strand	upstream
MSTRG.6891.1	StLNC1606	PGSC0003DMG400021055	PGSC0003DMT400054274	antisense	genic	0	containing	intronic
MSTRG.22591.1	StLNC1607	PGSC0003DMG400011403	PGSC0003DMT400029670	antisense	intergenic	3511	divergent	upstream
MSTRG.4104.2	StLNC1608	PGSC0003DMG400041267	PGSC0003DMT400091696	antisense	intergenic	27	convergent	downstream
MSTRG.11254.5	StLNC1609	PGSC0003DMG400000780	PGSC0003DMT400002042	antisense	genic	0	overlapping	exonic
MSTRG.19415.1	StLNC1610	PGSC0003DMG400039179	PGSC0003DMT400089608	antisense	intergenic	5098	divergent	upstream
MSTRG.14797.1	StLNC1611	PGSC0003DMG400024241	PGSC0003DMT400062292	sense	genic	0	overlapping	intronic
MSTRG.27367.2	StLNC1612	PGSC0003DMG400015354	PGSC0003DMT400039730	sense	genic	0	containing	intronic
MSTRG.749.3	StLNC1613	PGSC0003DMG400045050	PGSC0003DMT400095479	sense	intergenic	30745	same_strand	downstream
MSTRG.22523.1	StLNC1614	PGSC0003DMG400016850	PGSC0003DMT400043408	sense	intergenic	2656	same_strand	downstream
MSTRG.20662.2	StLNC1615	PGSC0003DMG400004783	PGSC0003DMT400012207	antisense	genic	0	overlapping	exonic
MSTRG.29313.19	StLNC1616	PGSC0003DMG400004677	PGSC0003DMT400011911	antisense	genic	0	overlapping	exonic
MSTRG.19404.2	StLNC1617	PGSC0003DMG400032785	PGSC0003DMT400082728	antisense	intergenic	15746	divergent	upstream
MSTRG.16802.1	StLNC1618	PGSC0003DMG400003186	PGSC0003DMT400008260	sense	intergenic	1479	same_strand	upstream
MSTRG.2589.1	StLNC1619	PGSC0003DMG400024689	PGSC0003DMT400063446	antisense	genic	0	overlapping	exonic
MSTRG.376.1	StLNC1620	PGSC0003DMG400010485	PGSC0003DMT400027174	antisense	intergenic	10172	convergent	downstream
MSTRG.20402.4	StLNC1621	PGSC0003DMG400002399	PGSC0003DMT400006170	antisense	intergenic	2813	divergent	upstream
MSTRG.5501.1	StLNC1622	PGSC0003DMG400001511	PGSC0003DMT400003813	antisense	genic	0	overlapping	exonic
MSTRG.25620.1	StLNC1623	PGSC0003DMG400016247	PGSC0003DMT400041874	sense	intergenic	7446	same_strand	downstream
MSTRG.18359.1	StLNC1624	PGSC0003DMG400017307	PGSC0003DMT400044590	antisense	intergenic	5674	convergent	downstream
MSTRG.28296.7	StLNC1625	PGSC0003DMG400021934	PGSC0003DMT400056456	sense	intergenic	29213	same_strand	downstream
MSTRG.3199.2	StLNC1626	PGSC0003DMG400010678	PGSC0003DMT400027709	antisense	intergenic	2918	divergent	upstream
MSTRG.10563.1	StLNC1627	PGSC0003DMG400033892	PGSC0003DMT400084243	sense	intergenic	6158	same_strand	downstream
MSTRG.14220.1	StLNC1628	PGSC0003DMG400007282	PGSC0003DMT400018787	sense	intergenic	4862	same_strand	upstream
MSTRG.24910.1	StLNC1629	PGSC0003DMG400028255	PGSC0003DMT400072619	sense	intergenic	2896	same_strand	upstream
MSTRG.789.1	StLNC1630	PGSC0003DMG400036483	PGSC0003DMT400086912	antisense	intergenic	4608	convergent	downstream
MSTRG.11254.60	StLNC1631	PGSC0003DMG400000783	PGSC0003DMT400002054	antisense	genic	0	nested	exonic
MSTRG.271.1	StLNC1632	PGSC0003DMG400016431	PGSC0003DMT400042364	sense	intergenic	99	same_strand	upstream
MSTRG.17457.1	StLNC1633	PGSC0003DMG400024326	PGSC0003DMT400062505	sense	intergenic	9263	same_strand	downstream
MSTRG.13157.5	StLNC1634	PGSC0003DMG400015053	PGSC0003DMT400038923	antisense	intergenic	4031	divergent	upstream
MSTRG.80.31	StLNC1635	PGSC0003DMG400032127	PGSC0003DMT400081823	sense	intergenic	13215	same_strand	upstream
MSTRG.19882.1	StLNC1636	PGSC0003DMG401002229	PGSC0003DMT400005684	sense	genic	0	containing	intronic
MSTRG.28202.1	StLNC1637	PGSC0003DMG400019373	PGSC0003DMT400049861	sense	intergenic	13412	same_strand	downstream
MSTRG.675.1	StLNC1638	PGSC0003DMG400024132	PGSC0003DMT400062007	sense	intergenic	2256	same_strand	upstream
MSTRG.19975.1	StLNC1639	PGSC0003DMG400002254	PGSC0003DMT400005767	antisense	genic	0	containing	intronic
MSTRG.18410.1	StLNC1640	PGSC0003DMG400027658	PGSC0003DMT400071119	sense	genic	0	containing	intronic
MSTRG.28744.2	StLNC1641	PGSC0003DMG400028867	PGSC0003DMT400074277	sense	intergenic	7144	same_strand	upstream
MSTRG.23464.3	StLNC1642	PGSC0003DMG400021268	PGSC0003DMT400054796	antisense	intergenic	4372	divergent	upstream
MSTRG.23827.2	StLNC1643	PGSC0003DMG400003245	PGSC0003DMT400008406	sense	intergenic	21595	same_strand	upstream
MSTRG.28369.1	StLNC1644	PGSC0003DMG400039445	PGSC0003DMT400089874	antisense	genic	0	containing	intronic
MSTRG.8798.1	StLNC1645	PGSC0003DMG400024560	PGSC0003DMT400063143	antisense	intergenic	1317	divergent	upstream
MSTRG.28326.1	StLNC1646	PGSC0003DMG400003351	PGSC0003DMT400008648	sense	intergenic	2722	same_strand	upstream
MSTRG.4952.6	StLNC1647	PGSC0003DMG400010236	PGSC0003DMT400026515	antisense	genic	0	nested	exonic
MSTRG.22136.1	StLNC1648	PGSC0003DMG400043463	PGSC0003DMT400093892	antisense	intergenic	2522	divergent	upstream
MSTRG.6763.1	StLNC1649	PGSC0003DMG400005082	PGSC0003DMT400013037	sense	intergenic	4620	same_strand	upstream
MSTRG.1549.2	StLNC1650	PGSC0003DMG400000840	PGSC0003DMT400002192	antisense	intergenic	9564	divergent	upstream
MSTRG.26521.1	StLNC1651	PGSC0003DMG400022871	PGSC0003DMT400058871	antisense	intergenic	21130	convergent	downstream
MSTRG.13408.2	StLNC1652	PGSC0003DMG400043970	PGSC0003DMT400094399	antisense	intergenic	16201	convergent	downstream
MSTRG.18024.1	StLNC1653	PGSC0003DMG400028959	PGSC0003DMT400074510	sense	intergenic	7791	same_strand	upstream
MSTRG.10034.2	StLNC1654	PGSC0003DMG400006342	PGSC0003DMT400016230	sense	intergenic	3880	same_strand	upstream
MSTRG.17517.1	StLNC1655	PGSC0003DMG400016074	PGSC0003DMT400041473	antisense	intergenic	18183	divergent	upstream
MSTRG.15262.5	StLNC1656	PGSC0003DMG400042570	PGSC0003DMT400092999	antisense	genic	0	overlapping	exonic
MSTRG.3719.3	StLNC1657	PGSC0003DMG400014672	PGSC0003DMT400038054	antisense	intergenic	1848	divergent	upstream
MSTRG.6683.1	StLNC1658	PGSC0003DMG400038480	PGSC0003DMT400088909	sense	intergenic	3236	same_strand	upstream
MSTRG.8674.1	StLNC1659	PGSC0003DMG400024503	PGSC0003DMT400062965	antisense	genic	0	overlapping	exonic
MSTRG.15657.1	StLNC1660	PGSC0003DMG400007753	PGSC0003DMT400020039	sense	intergenic	11492	same_strand	downstream
MSTRG.23191.1	StLNC1661	PGSC0003DMG400016599	PGSC0003DMT400042752	sense	intergenic	3658	same_strand	downstream
MSTRG.21172.1	StLNC1662	PGSC0003DMG401002177	PGSC0003DMT400005561	antisense	intergenic	1631	divergent	upstream
MSTRG.27644.7	StLNC1663	PGSC0003DMG400000323	PGSC0003DMT400000859	antisense	intergenic	4614	convergent	downstream
MSTRG.5258.1	StLNC1664	PGSC0003DMG400021730	PGSC0003DMT400055949	antisense	genic	0	containing	intronic
MSTRG.511.1	StLNC1665	PGSC0003DMG400037399	PGSC0003DMT400087828	antisense	intergenic	11637	divergent	upstream
MSTRG.1247.1	StLNC1666	PGSC0003DMG400022660	PGSC0003DMT400058344	sense	intergenic	8302	same_strand	downstream
MSTRG.21861.2	StLNC1667	PGSC0003DMG400026789	PGSC0003DMT400068885	sense	intergenic	7376	same_strand	upstream
MSTRG.23852.1	StLNC1668	PGSC0003DMG400040173	PGSC0003DMT400090602	antisense	intergenic	7230	convergent	downstream
MSTRG.19286.1	StLNC1669	PGSC0003DMG400044583	PGSC0003DMT400095012	antisense	intergenic	6271	divergent	upstream
MSTRG.19686.1	StLNC1670	PGSC0003DMG401018810	PGSC0003DMT400048422	sense	intergenic	5410	same_strand	upstream
MSTRG.7748.1	StLNC1671	PGSC0003DMG400014329	PGSC0003DMT400037162	antisense	genic	0	overlapping	exonic
MSTRG.12148.1	StLNC1672	PGSC0003DMG400009893	PGSC0003DMT400025613	sense	intergenic	395	same_strand	downstream
MSTRG.3483.25	StLNC1673	PGSC0003DMG400025186	PGSC0003DMT400064863	antisense	intergenic	271	convergent	downstream
MSTRG.14935.3	StLNC1674	PGSC0003DMG400016634	PGSC0003DMT400042900	antisense	genic	0	overlapping	exonic
MSTRG.947.1	StLNC1675	PGSC0003DMG400037465	PGSC0003DMT400087894	antisense	intergenic	15506	divergent	upstream
MSTRG.8049.2	StLNC1676	PGSC0003DMG400000575	PGSC0003DMT400001555	sense	intergenic	6574	same_strand	upstream
MSTRG.3251.2	StLNC1677	PGSC0003DMG402025733	PGSC0003DMT400066100	sense	genic	0	containing	intronic
MSTRG.11168.5	StLNC1678	PGSC0003DMG400024863	PGSC0003DMT400063966	sense	intergenic	2592	same_strand	upstream
MSTRG.20978.5	StLNC1679	PGSC0003DMG400012149	PGSC0003DMT400031677	antisense	intergenic	3194	divergent	upstream
MSTRG.1213.1	StLNC1680	PGSC0003DMG400011334	PGSC0003DMT400029476	antisense	intergenic	4707	convergent	downstream
MSTRG.7619.1	StLNC1681	PGSC0003DMG400012020	PGSC0003DMT400031363	antisense	intergenic	74476	divergent	upstream
MSTRG.21140.1	StLNC1682	PGSC0003DMG400020335	PGSC0003DMT400052383	antisense	genic	0	overlapping	exonic
MSTRG.14566.2	StLNC1683	PGSC0003DMG400012099	PGSC0003DMT400031540	antisense	intergenic	6050	divergent	upstream
MSTRG.15688.1	StLNC1684	PGSC0003DMG400026522	PGSC0003DMT400068219	sense	intergenic	487	same_strand	downstream
MSTRG.4798.2	StLNC1685	PGSC0003DMG400008301	PGSC0003DMT400021392	antisense	genic	0	overlapping	exonic
MSTRG.8167.2	StLNC1686	PGSC0003DMG400004343	PGSC0003DMT400011103	antisense	genic	0	overlapping	exonic
MSTRG.20603.1	StLNC1687	PGSC0003DMG400037639	PGSC0003DMT400088068	sense	intergenic	69934	same_strand	downstream
MSTRG.16781.1	StLNC1688	PGSC0003DMG400037480	PGSC0003DMT400087909	sense	genic	0	containing	intronic
MSTRG.3741.2	StLNC1689	PGSC0003DMG401014665	PGSC0003DMT400038023	sense	intergenic	2208	same_strand	downstream
MSTRG.27019.18	StLNC1690	PGSC0003DMG400045237	PGSC0003DMT400095666	antisense	intergenic	20488	convergent	downstream
MSTRG.1243.36	StLNC1691	PGSC0003DMG400046162	PGSC0003DMT400096591	antisense	genic	0	containing	intronic
MSTRG.3483.26	StLNC1692	PGSC0003DMG400025186	PGSC0003DMT400064863	antisense	intergenic	282	convergent	downstream
MSTRG.23245.7	StLNC1693	PGSC0003DMG400021603	PGSC0003DMT400055632	antisense	genic	0	nested	exonic
MSTRG.15420.1	StLNC1694	PGSC0003DMG400044726	PGSC0003DMT400095155	sense	intergenic	5699	same_strand	downstream
MSTRG.17258.33	StLNC1695	PGSC0003DMG400009565	PGSC0003DMT400024747	sense	genic	0	containing	intronic
MSTRG.4095.1	StLNC1696	PGSC0003DMG400017476	PGSC0003DMT400045070	sense	intergenic	4553	same_strand	upstream
MSTRG.23086.2	StLNC1697	PGSC0003DMG400007743	PGSC0003DMT400020005	antisense	genic	0	overlapping	exonic
MSTRG.22918.1	StLNC1698	PGSC0003DMG400017202	PGSC0003DMT400044301	sense	intergenic	10463	same_strand	downstream
MSTRG.26376.1	StLNC1699	PGSC0003DMG400015697	PGSC0003DMT400040598	antisense	genic	0	containing	intronic
MSTRG.959.2	StLNC1700	PGSC0003DMG400047121	PGSC0003DMT400097550	sense	intergenic	65029	same_strand	upstream
MSTRG.28168.12	StLNC1701	PGSC0003DMG400005293	PGSC0003DMT400013554	antisense	intergenic	2121	convergent	downstream
MSTRG.14875.2	StLNC1702	PGSC0003DMG400029156	PGSC0003DMT400074958	antisense	genic	0	overlapping	exonic
MSTRG.5639.1	StLNC1703	PGSC0003DMG400003551	PGSC0003DMT400009133	antisense	intergenic	7922	divergent	upstream
MSTRG.25547.1	StLNC1704	PGSC0003DMG400016207	PGSC0003DMT400041783	antisense	genic	0	nested	exonic
MSTRG.23245.51	StLNC1705	PGSC0003DMG400021603	PGSC0003DMT400055632	antisense	genic	0	nested	exonic
MSTRG.16779.2	StLNC1706	PGSC0003DMG400003192	PGSC0003DMT400008273	antisense	genic	0	containing	intronic
MSTRG.28168.5	StLNC1707	PGSC0003DMG400005293	PGSC0003DMT400013554	antisense	intergenic	1988	convergent	downstream
MSTRG.15012.6	StLNC1708	PGSC0003DMG400021581	PGSC0003DMT400055564	antisense	intergenic	1340	divergent	upstream
MSTRG.28759.1	StLNC1709	PGSC0003DMG400028842	PGSC0003DMT400074206	antisense	genic	0	overlapping	exonic
MSTRG.1243.42	StLNC1710	PGSC0003DMG400046162	PGSC0003DMT400096591	antisense	intergenic	17787	divergent	upstream
MSTRG.11254.3	StLNC1711	PGSC0003DMG400000780	PGSC0003DMT400002042	antisense	genic	0	containing	exonic
MSTRG.2603.4	StLNC1712	PGSC0003DMG400024743	PGSC0003DMT400063662	sense	intergenic	1269	same_strand	upstream
MSTRG.19518.2	StLNC1713	PGSC0003DMG400014836	PGSC0003DMT400038438	antisense	intergenic	1912	convergent	downstream
MSTRG.23245.67	StLNC1714	PGSC0003DMG400021603	PGSC0003DMT400055632	antisense	genic	0	nested	exonic
MSTRG.17516.2	StLNC1715	PGSC0003DMG400016074	PGSC0003DMT400041473	antisense	intergenic	54220	divergent	upstream
MSTRG.19501.1	StLNC1716	PGSC0003DMG400013761	PGSC0003DMT400035762	antisense	intergenic	25741	convergent	downstream
MSTRG.23170.16	StLNC1717	PGSC0003DMG400016621	PGSC0003DMT400042841	sense	intergenic	3970	same_strand	upstream
MSTRG.19186.1	StLNC1718	PGSC0003DMG400001166	PGSC0003DMT400002969	sense	intergenic	17222	same_strand	downstream
MSTRG.14513.2	StLNC1719	PGSC0003DMG400008695	PGSC0003DMT400022437	antisense	intergenic	619	convergent	downstream
MSTRG.4116.1	StLNC1720	PGSC0003DMG404008678	PGSC0003DMT400022377	sense	intergenic	710	same_strand	upstream
MSTRG.15864.3	StLNC1721	PGSC0003DMG402028496	PGSC0003DMT400073327	antisense	genic	0	containing	intronic
MSTRG.17737.1	StLNC1722	PGSC0003DMG400013537	PGSC0003DMT400035206	antisense	genic	0	nested	exonic
MSTRG.2796.6	StLNC1723	PGSC0003DMG400018242	PGSC0003DMT400046967	sense	intergenic	284	same_strand	downstream
MSTRG.1243.22	StLNC1724	PGSC0003DMG400046162	PGSC0003DMT400096591	antisense	genic	0	containing	intronic
MSTRG.13212.1	StLNC1725	PGSC0003DMG400037113	PGSC0003DMT400087542	antisense	intergenic	506	convergent	downstream
MSTRG.8958.1	StLNC1726	PGSC0003DMG400014149	PGSC0003DMT400036691	sense	intergenic	599	same_strand	upstream
MSTRG.19455.10	StLNC1727	PGSC0003DMG400017885	PGSC0003DMT400046087	sense	intergenic	3801	same_strand	upstream
MSTRG.24646.1	StLNC1728	PGSC0003DMG400008596	PGSC0003DMT400022156	sense	intergenic	138	same_strand	downstream
MSTRG.29317.183	StLNC1729	PGSC0003DMG400004593	PGSC0003DMT400011693	antisense	intergenic	4930	divergent	upstream
MSTRG.27081.1	StLNC1730	PGSC0003DMG400018692	PGSC0003DMT400048108	antisense	genic	0	overlapping	exonic
MSTRG.12667.14	StLNC1731	PGSC0003DMG400018429	PGSC0003DMT400047418	sense	intergenic	2177	same_strand	downstream
MSTRG.23360.2	StLNC1732	PGSC0003DMG400014384	PGSC0003DMT400037283	antisense	intergenic	4677	convergent	downstream
MSTRG.20094.1	StLNC1733	PGSC0003DMG400039609	PGSC0003DMT400090038	sense	intergenic	7488	same_strand	upstream
MSTRG.12918.1	StLNC1734	PGSC0003DMG400047305	PGSC0003DMT400097734	antisense	intergenic	20022	divergent	upstream
MSTRG.28320.8	StLNC1735	PGSC0003DMG400002364	PGSC0003DMT400006086	antisense	genic	0	nested	exonic
MSTRG.1657.24	StLNC1736	PGSC0003DMG400006794	PGSC0003DMT400017493	sense	intergenic	11678	same_strand	downstream
MSTRG.28296.3	StLNC1737	PGSC0003DMG400021934	PGSC0003DMT400056456	sense	intergenic	28450	same_strand	downstream
MSTRG.29384.1	StLNC1738	PGSC0003DMG400004710	PGSC0003DMT400012001	antisense	intergenic	3168	divergent	upstream
MSTRG.4042.1	StLNC1739	PGSC0003DMG400021473	PGSC0003DMT400055320	antisense	genic	0	overlapping	exonic
MSTRG.3010.1	StLNC1740	PGSC0003DMG400044001	PGSC0003DMT400094430	antisense	intergenic	830	divergent	upstream
MSTRG.19072.17	StLNC1741	PGSC0003DMG402009541	PGSC0003DMT400024676	sense	genic	0	overlapping	intronic
MSTRG.2592.1	StLNC1742	PGSC0003DMG400024690	PGSC0003DMT400063452	antisense	genic	0	overlapping	exonic
MSTRG.5942.1	StLNC1743	PGSC0003DMG400021414	PGSC0003DMT400055176	antisense	intergenic	618	convergent	downstream
MSTRG.10686.1	StLNC1744	PGSC0003DMG400035656	PGSC0003DMT400086085	sense	intergenic	40800	same_strand	upstream
MSTRG.28320.1	StLNC1745	PGSC0003DMG400002364	PGSC0003DMT400006086	antisense	genic	0	nested	exonic
MSTRG.22533.1	StLNC1746	PGSC0003DMG400031864	PGSC0003DMT400081468	sense	intergenic	22240	same_strand	upstream
MSTRG.7063.9	StLNC1747	PGSC0003DMG400019041	PGSC0003DMT400049001	sense	genic	0	containing	intronic
MSTRG.10691.5	StLNC1748	PGSC0003DMG400033871	PGSC0003DMT400084197	antisense	intergenic	22151	convergent	downstream
MSTRG.1318.1	StLNC1749	PGSC0003DMG400006301	PGSC0003DMT400016119	antisense	intergenic	2506	convergent	downstream
MSTRG.23989.2	StLNC1750	PGSC0003DMG400017689	PGSC0003DMT400045604	sense	intergenic	33272	same_strand	upstream
MSTRG.19285.2	StLNC1751	PGSC0003DMG400044583	PGSC0003DMT400095012	antisense	intergenic	19133	divergent	upstream
MSTRG.11676.1	StLNC1752	PGSC0003DMG400004962	PGSC0003DMT400012732	sense	intergenic	743	same_strand	downstream
MSTRG.28125.2	StLNC1753	PGSC0003DMG400002238	PGSC0003DMT400005722	antisense	genic	0	overlapping	exonic
MSTRG.23086.1	StLNC1754	PGSC0003DMG402026432	PGSC0003DMT400067963	antisense	genic	0	overlapping	intronic
MSTRG.10782.3	StLNC1755	PGSC0003DMG400028706	PGSC0003DMT400073876	antisense	genic	0	overlapping	exonic
MSTRG.3616.1	StLNC1756	PGSC0003DMG400001631	PGSC0003DMT400004126	antisense	genic	0	nested	exonic
MSTRG.29120.2	StLNC1757	PGSC0003DMG400029294	PGSC0003DMT400075325	sense	intergenic	1623	same_strand	downstream
MSTRG.6940.1	StLNC1758	PGSC0003DMG400016685	PGSC0003DMT400043020	sense	intergenic	14994	same_strand	downstream
MSTRG.29362.1	StLNC1759	PGSC0003DMG400004701	PGSC0003DMT400011979	sense	intergenic	1004	same_strand	downstream
MSTRG.29278.1	StLNC1760	PGSC0003DMG400004664	PGSC0003DMT400011875	sense	intergenic	7177	same_strand	downstream
MSTRG.10678.1	StLNC1761	PGSC0003DMG400004247	PGSC0003DMT400010851	antisense	intergenic	51113	convergent	downstream
MSTRG.1223.1	StLNC1762	PGSC0003DMG400046121	PGSC0003DMT400096550	antisense	intergenic	6744	divergent	upstream
MSTRG.3251.4	StLNC1763	PGSC0003DMG402025733	PGSC0003DMT400066100	sense	intergenic	1037	same_strand	downstream
MSTRG.19560.1	StLNC1764	PGSC0003DMG400029898	PGSC0003DMT400076868	sense	intergenic	3603	same_strand	downstream
MSTRG.1184.1	StLNC1765	PGSC0003DMG400027837	PGSC0003DMT400071563	sense	intergenic	9291	same_strand	upstream
MSTRG.6039.2	StLNC1766	PGSC0003DMG400004010	PGSC0003DMT400010250	sense	intergenic	12274	same_strand	downstream
MSTRG.27569.1	StLNC1767	PGSC0003DMG400024437	PGSC0003DMT400062784	antisense	genic	0	overlapping	exonic
MSTRG.24557.1	StLNC1768	PGSC0003DMG400019224	PGSC0003DMT400049468	sense	intergenic	2874	same_strand	upstream
MSTRG.11175.2	StLNC1769	PGSC0003DMG400024857	PGSC0003DMT400063955	antisense	intergenic	24040	divergent	upstream
MSTRG.20027.1	StLNC1770	PGSC0003DMG400047074	PGSC0003DMT400097503	antisense	intergenic	1802	convergent	downstream
MSTRG.27437.1	StLNC1771	PGSC0003DMG400007851	PGSC0003DMT400020306	sense	intergenic	495	same_strand	downstream
MSTRG.23880.2	StLNC1772	PGSC0003DMG400036134	PGSC0003DMT400086563	antisense	intergenic	17540	convergent	downstream
MSTRG.6945.2	StLNC1773	PGSC0003DMG400030255	PGSC0003DMT400077778	sense	intergenic	3290	same_strand	upstream
MSTRG.4665.5	StLNC1774	PGSC0003DMG400021134	PGSC0003DMT400054452	sense	intergenic	656	same_strand	upstream
MSTRG.20978.4	StLNC1775	PGSC0003DMG400012149	PGSC0003DMT400031677	antisense	intergenic	3190	divergent	upstream
MSTRG.923.3	StLNC1776	PGSC0003DMG400015973	PGSC0003DMT400041261	sense	genic	0	containing	intronic
MSTRG.19281.4	StLNC1777	PGSC0003DMG400039843	PGSC0003DMT400090272	sense	genic	0	containing	intronic
MSTRG.26464.1	StLNC1778	PGSC0003DMG400007589	PGSC0003DMT400019638	sense	intergenic	4027	same_strand	upstream
MSTRG.29283.1	StLNC1779	PGSC0003DMG400004663	PGSC0003DMT400011873	sense	intergenic	8864	same_strand	upstream
MSTRG.5287.1	StLNC1780	PGSC0003DMG400002086	PGSC0003DMT400005344	sense	intergenic	9889	same_strand	upstream
MSTRG.6705.1	StLNC1781	PGSC0003DMG400012825	PGSC0003DMT400033382	antisense	intergenic	5487	convergent	downstream
MSTRG.24696.8	StLNC1782	PGSC0003DMG400011130	PGSC0003DMT400028913	antisense	genic	0	containing	intronic
MSTRG.1212.1	StLNC1783	PGSC0003DMG400011334	PGSC0003DMT400029476	antisense	intergenic	12086	convergent	downstream
MSTRG.24731.1	StLNC1784	PGSC0003DMG400011032	PGSC0003DMT400028657	antisense	genic	0	nested	exonic
MSTRG.21793.1	StLNC1785	PGSC0003DMG400034410	PGSC0003DMT400084839	antisense	intergenic	31869	convergent	downstream
MSTRG.24331.1	StLNC1786	PGSC0003DMG400013216	PGSC0003DMT400034373	antisense	intergenic	8135	convergent	downstream
MSTRG.5342.2	StLNC1787	PGSC0003DMG400016437	PGSC0003DMT400042390	sense	intergenic	686	same_strand	upstream
MSTRG.672.2	StLNC1788	PGSC0003DMG400044405	PGSC0003DMT400094834	sense	intergenic	5776	same_strand	upstream
MSTRG.17132.2	StLNC1789	PGSC0003DMG400010980	PGSC0003DMT400028514	sense	genic	0	containing	intronic
MSTRG.14563.1	StLNC1790	PGSC0003DMG400030056	PGSC0003DMT400077268	antisense	genic	0	nested	exonic
MSTRG.13457.4	StLNC1791	PGSC0003DMG400023044	PGSC0003DMT400059307	sense	intergenic	2681	same_strand	upstream
MSTRG.3449.4	StLNC1792	PGSC0003DMG400025953	PGSC0003DMT400066758	sense	intergenic	3157	same_strand	upstream
MSTRG.8800.1	StLNC1793	PGSC0003DMG400024560	PGSC0003DMT400063143	antisense	intergenic	367	divergent	upstream
MSTRG.2522.2	StLNC1794	PGSC0003DMG402028565	PGSC0003DMT400073532	antisense	genic	0	overlapping	exonic
MSTRG.19618.1	StLNC1795	PGSC0003DMG400038559	PGSC0003DMT400088988	sense	intergenic	20835	same_strand	upstream
MSTRG.17857.2	StLNC1796	PGSC0003DMG400035925	PGSC0003DMT400086354	antisense	intergenic	123	convergent	downstream
MSTRG.3554.2	StLNC1797	PGSC0003DMG400030970	PGSC0003DMT400079538	antisense	intergenic	4406	convergent	downstream
MSTRG.1657.30	StLNC1798	PGSC0003DMG400006794	PGSC0003DMT400017493	sense	intergenic	28650	same_strand	downstream
MSTRG.7250.1	StLNC1799	PGSC0003DMG400046525	PGSC0003DMT400096954	antisense	genic	0	overlapping	exonic
MSTRG.5519.1	StLNC1800	PGSC0003DMG400001567	PGSC0003DMT400003983	antisense	genic	0	nested	exonic
MSTRG.19686.3	StLNC1801	PGSC0003DMG401018810	PGSC0003DMT400048422	sense	intergenic	5415	same_strand	upstream
MSTRG.23863.4	StLNC1802	PGSC0003DMG400043035	PGSC0003DMT400093464	antisense	genic	0	containing	intronic
MSTRG.17166.1	StLNC1803	PGSC0003DMG401028727	PGSC0003DMT400073919	sense	intergenic	13353	same_strand	downstream
MSTRG.11254.63	StLNC1804	PGSC0003DMG400000783	PGSC0003DMT400002054	antisense	genic	0	nested	exonic
MSTRG.10686.2	StLNC1805	PGSC0003DMG400035656	PGSC0003DMT400086085	sense	intergenic	44863	same_strand	upstream
MSTRG.19393.1	StLNC1806	PGSC0003DMG400030150	PGSC0003DMT400077533	sense	intergenic	11925	same_strand	downstream
MSTRG.10805.4	StLNC1807	PGSC0003DMG400010575	PGSC0003DMT400027418	sense	intergenic	8834	same_strand	downstream
MSTRG.3850.2	StLNC1808	PGSC0003DMG400006733	PGSC0003DMT400017277	antisense	intergenic	12441	divergent	upstream
MSTRG.21799.1	StLNC1809	PGSC0003DMG400017033	PGSC0003DMT400043891	antisense	intergenic	14154	divergent	upstream
MSTRG.27518.3	StLNC1810	PGSC0003DMG400038772	PGSC0003DMT400089201	antisense	intergenic	5508	divergent	upstream
MSTRG.16980.2	StLNC1811	PGSC0003DMG401018748	PGSC0003DMT400048256	sense	intergenic	5099	same_strand	upstream
MSTRG.28771.1	StLNC1812	PGSC0003DMG400042574	PGSC0003DMT400093003	antisense	intergenic	3991	convergent	downstream
MSTRG.23245.19	StLNC1813	PGSC0003DMG400021603	PGSC0003DMT400055632	antisense	genic	0	nested	exonic
MSTRG.1243.30	StLNC1814	PGSC0003DMG400046162	PGSC0003DMT400096591	antisense	intergenic	6757	convergent	downstream
MSTRG.3022.1	StLNC1815	PGSC0003DMG400023779	PGSC0003DMT400061120	sense	genic	0	nested	intronic
MSTRG.25473.1	StLNC1816	PGSC0003DMG400015675	PGSC0003DMT400040488	sense	intergenic	1216	same_strand	upstream
MSTRG.25238.12	StLNC1817	PGSC0003DMG401011427	PGSC0003DMT400029713	sense	intergenic	4394	same_strand	upstream
MSTRG.23245.86	StLNC1818	PGSC0003DMG400021603	PGSC0003DMT400055632	antisense	genic	0	nested	exonic
MSTRG.11646.4	StLNC1819	PGSC0003DMG400009349	PGSC0003DMT400024193	antisense	genic	0	overlapping	exonic
MSTRG.1948.1	StLNC1820	PGSC0003DMG400025992	PGSC0003DMT400066855	antisense	genic	0	overlapping	intronic
MSTRG.13953.1	StLNC1821	PGSC0003DMG400013084	PGSC0003DMT400034043	antisense	genic	0	overlapping	exonic
MSTRG.19981.1	StLNC1822	PGSC0003DMG400029716	PGSC0003DMT400076416	antisense	genic	0	overlapping	exonic
MSTRG.17258.32	StLNC1823	PGSC0003DMG400009565	PGSC0003DMT400024747	sense	genic	0	containing	intronic
MSTRG.10998.24	StLNC1824	PGSC0003DMG400044220	PGSC0003DMT400094649	sense	intergenic	18612	same_strand	downstream
MSTRG.7747.9	StLNC1825	PGSC0003DMG401014331	PGSC0003DMT400037170	sense	intergenic	810	same_strand	downstream
MSTRG.3774.3	StLNC1826	PGSC0003DMG400042313	PGSC0003DMT400092742	antisense	genic	0	containing	intronic
MSTRG.11254.13	StLNC1827	PGSC0003DMG400000776	PGSC0003DMT400002035	antisense	genic	0	overlapping	exonic
MSTRG.14513.4	StLNC1828	PGSC0003DMG400008695	PGSC0003DMT400022437	antisense	genic	0	overlapping	exonic
MSTRG.21336.1	StLNC1829	PGSC0003DMG402008965	PGSC0003DMT400023163	sense	intergenic	1516	same_strand	downstream
MSTRG.10196.6	StLNC1830	PGSC0003DMG400019731	PGSC0003DMT400050795	sense	genic	0	overlapping	intronic
MSTRG.20609.1	StLNC1831	PGSC0003DMG400004770	PGSC0003DMT400012166	antisense	intergenic	3068	divergent	upstream
MSTRG.11254.10	StLNC1832	PGSC0003DMG400000776	PGSC0003DMT400002035	antisense	genic	0	overlapping	exonic
MSTRG.959.3	StLNC1833	PGSC0003DMG400047121	PGSC0003DMT400097550	sense	intergenic	71631	same_strand	upstream
MSTRG.14508.1	StLNC1834	PGSC0003DMG400044422	PGSC0003DMT400094851	antisense	intergenic	6298	convergent	downstream
MSTRG.15158.1	StLNC1835	PGSC0003DMG401016333	PGSC0003DMT400042121	antisense	genic	0	nested	exonic
MSTRG.20341.1	StLNC1836	PGSC0003DMG400030877	PGSC0003DMT400079328	antisense	intergenic	364	convergent	downstream
MSTRG.23245.44	StLNC1837	PGSC0003DMG400021603	PGSC0003DMT400055632	antisense	genic	0	nested	exonic
MSTRG.22378.1	StLNC1838	PGSC0003DMG400007542	PGSC0003DMT400019516	antisense	intergenic	8634	convergent	downstream
MSTRG.11588.1	StLNC1839	PGSC0003DMG400012910	PGSC0003DMT400033620	sense	intergenic	7550	same_strand	downstream
MSTRG.11254.2	StLNC1840	PGSC0003DMG400000776	PGSC0003DMT400002035	antisense	genic	0	overlapping	exonic
MSTRG.29283.4	StLNC1841	PGSC0003DMG400004663	PGSC0003DMT400011873	sense	intergenic	9001	same_strand	upstream
MSTRG.11254.1	StLNC1842	PGSC0003DMG400000776	PGSC0003DMT400002035	antisense	genic	0	overlapping	exonic
MSTRG.28503.2	StLNC1843	PGSC0003DMG400035751	PGSC0003DMT400086180	antisense	intergenic	18619	divergent	upstream
MSTRG.24731.2	StLNC1844	PGSC0003DMG400011032	PGSC0003DMT400028657	antisense	genic	0	nested	exonic
MSTRG.12716.1	StLNC1845	PGSC0003DMG401025549	PGSC0003DMT400065678	sense	genic	0	containing	intronic
MSTRG.1213.5	StLNC1846	PGSC0003DMG400011334	PGSC0003DMT400029476	antisense	intergenic	4707	convergent	downstream
MSTRG.16642.1	StLNC1847	PGSC0003DMG400020162	PGSC0003DMT400051950	sense	intergenic	7355	same_strand	downstream
MSTRG.14881.2	StLNC1848	PGSC0003DMG400027979	PGSC0003DMT400071914	sense	intergenic	33746	same_strand	upstream
MSTRG.15262.7	StLNC1849	PGSC0003DMG400030782	PGSC0003DMT400079095	antisense	intergenic	858	convergent	downstream
MSTRG.17737.3	StLNC1850	PGSC0003DMG400013537	PGSC0003DMT400035206	antisense	genic	0	nested	exonic
MSTRG.28296.46	StLNC1851	PGSC0003DMG400014999	PGSC0003DMT400038813	antisense	intergenic	79529	convergent	downstream
MSTRG.26874.4	StLNC1852	PGSC0003DMG400026364	PGSC0003DMT400067782	sense	intergenic	38	same_strand	upstream
MSTRG.28300.1	StLNC1853	PGSC0003DMG400014999	PGSC0003DMT400038813	antisense	intergenic	87423	convergent	downstream
MSTRG.24660.2	StLNC1854	PGSC0003DMG400028001	PGSC0003DMT400071965	sense	intergenic	7749	same_strand	upstream
MSTRG.4243.2	StLNC1855	PGSC0003DMG400010419	PGSC0003DMT400027003	sense	intergenic	276	same_strand	upstream
MSTRG.22559.1	StLNC1856	PGSC0003DMG400011388	PGSC0003DMT400029616	antisense	intergenic	2342	convergent	downstream
MSTRG.80.42	StLNC1857	PGSC0003DMG400032127	PGSC0003DMT400081823	sense	intergenic	11119	same_strand	upstream
MSTRG.15041.2	StLNC1858	PGSC0003DMG400004518	PGSC0003DMT400011496	antisense	intergenic	2147	convergent	downstream
MSTRG.13257.1	StLNC1859	PGSC0003DMG400027432	PGSC0003DMT400070578	sense	intergenic	746	same_strand	upstream
MSTRG.22745.1	StLNC1860	PGSC0003DMG404006439	PGSC0003DMT400016484	antisense	intergenic	1153	divergent	upstream
MSTRG.25213.1	StLNC1861	PGSC0003DMG400011425	PGSC0003DMT400029708	antisense	intergenic	8512	divergent	upstream
MSTRG.13212.2	StLNC1862	PGSC0003DMG400037113	PGSC0003DMT400087542	antisense	intergenic	535	convergent	downstream
MSTRG.20598.1	StLNC1863	PGSC0003DMG400004774	PGSC0003DMT400012181	sense	intergenic	96292	same_strand	downstream
MSTRG.5835.6	StLNC1864	PGSC0003DMG400030593	PGSC0003DMT400078609	sense	intergenic	6916	same_strand	downstream
MSTRG.24040.1	StLNC1865	PGSC0003DMG400003436	PGSC0003DMT400008843	antisense	intergenic	20295	convergent	downstream
MSTRG.7258.1	StLNC1866	PGSC0003DMG400011959	PGSC0003DMT400031215	antisense	intergenic	7297	divergent	upstream
MSTRG.7488.1	StLNC1867	PGSC0003DMG400005261	PGSC0003DMT400013488	sense	intergenic	21923	same_strand	upstream
MSTRG.11175.1	StLNC1868	PGSC0003DMG400024857	PGSC0003DMT400063955	antisense	intergenic	23902	divergent	upstream
MSTRG.13482.1	StLNC1869	PGSC0003DMG400044938	PGSC0003DMT400095367	sense	intergenic	23351	same_strand	downstream
MSTRG.17762.1	StLNC1870	PGSC0003DMG400011755	PGSC0003DMT400030684	sense	genic	0	nested	intronic
MSTRG.2796.8	StLNC1871	PGSC0003DMG400018242	PGSC0003DMT400046967	sense	intergenic	2395	same_strand	downstream
MSTRG.2753.2	StLNC1872	PGSC0003DMG400002789	PGSC0003DMT400007215	sense	intergenic	1451	same_strand	downstream
MSTRG.2796.2	StLNC1873	PGSC0003DMG400018242	PGSC0003DMT400046967	sense	intergenic	292	same_strand	downstream
MSTRG.11988.1	StLNC1874	PGSC0003DMG400005151	PGSC0003DMT400013188	antisense	intergenic	1846	divergent	upstream
MSTRG.29313.42	StLNC1875	PGSC0003DMG400004677	PGSC0003DMT400011911	antisense	genic	0	nested	exonic
MSTRG.28195.1	StLNC1876	PGSC0003DMG400043689	PGSC0003DMT400094118	sense	intergenic	2044	same_strand	downstream
MSTRG.24117.8	StLNC1877	PGSC0003DMG400043806	PGSC0003DMT400094235	sense	intergenic	54388	same_strand	upstream
MSTRG.12103.2	StLNC1878	PGSC0003DMG400009943	PGSC0003DMT400025756	antisense	intergenic	19345	divergent	upstream
MSTRG.435.1	StLNC1879	PGSC0003DMG401005535	PGSC0003DMT400014110	antisense	intergenic	11232	divergent	upstream
MSTRG.24389.2	StLNC1880	PGSC0003DMG400027689	PGSC0003DMT400071214	sense	intergenic	3912	same_strand	upstream
MSTRG.23245.65	StLNC1881	PGSC0003DMG400021603	PGSC0003DMT400055632	antisense	genic	0	nested	exonic
MSTRG.6610.2	StLNC1882	PGSC0003DMG400013412	PGSC0003DMT400034893	antisense	genic	0	containing	exonic
MSTRG.7147.3	StLNC1883	PGSC0003DMG400009763	PGSC0003DMT400025276	antisense	intergenic	14172	convergent	downstream
MSTRG.3483.23	StLNC1884	PGSC0003DMG400025186	PGSC0003DMT400064863	antisense	intergenic	363	convergent	downstream
MSTRG.24340.11	StLNC1885	PGSC0003DMG400026726	PGSC0003DMT400068730	sense	genic	0	containing	intronic
MSTRG.13146.2	StLNC1886	PGSC0003DMG400014918	PGSC0003DMT400038619	antisense	intergenic	9359	divergent	upstream
MSTRG.551.1	StLNC1887	PGSC0003DMG400037762	PGSC0003DMT400088191	antisense	intergenic	6377	convergent	downstream
MSTRG.5798.3	StLNC1888	PGSC0003DMG400037504	PGSC0003DMT400087933	antisense	intergenic	5941	divergent	upstream
MSTRG.11228.3	StLNC1889	PGSC0003DMG403024846	PGSC0003DMT400063932	sense	intergenic	3935	same_strand	upstream
MSTRG.23425.3	StLNC1890	PGSC0003DMG400025028	PGSC0003DMT400064422	sense	intergenic	7107	same_strand	downstream
MSTRG.18319.1	StLNC1891	PGSC0003DMG400017336	PGSC0003DMT400044685	antisense	intergenic	10150	divergent	upstream
MSTRG.2796.4	StLNC1892	PGSC0003DMG400018242	PGSC0003DMT400046967	sense	intergenic	283	same_strand	downstream
MSTRG.11096.1	StLNC1893	PGSC0003DMG400044245	PGSC0003DMT400094674	antisense	genic	0	containing	intronic
MSTRG.25332.1	StLNC1894	PGSC0003DMG400013296	PGSC0003DMT400034600	sense	intergenic	5477	same_strand	upstream
MSTRG.29313.41	StLNC1895	PGSC0003DMG400004677	PGSC0003DMT400011911	antisense	genic	0	nested	exonic
MSTRG.28296.33	StLNC1896	PGSC0003DMG400021934	PGSC0003DMT400056456	sense	intergenic	90343	same_strand	downstream
MSTRG.28313.4	StLNC1897	PGSC0003DMG400035822	PGSC0003DMT400086251	sense	intergenic	6421	same_strand	downstream
MSTRG.1869.12	StLNC1898	PGSC0003DMG400001681	PGSC0003DMT400004222	sense	genic	0	containing	intronic
MSTRG.17481.1	StLNC1899	PGSC0003DMG400045503	PGSC0003DMT400095932	sense	intergenic	5248	same_strand	upstream
MSTRG.29317.178	StLNC1900	PGSC0003DMG400004593	PGSC0003DMT400011693	antisense	intergenic	10445	divergent	upstream
MSTRG.8168.1	StLNC1901	PGSC0003DMG400012023	PGSC0003DMT400031366	antisense	genic	0	overlapping	exonic
MSTRG.19298.1	StLNC1902	PGSC0003DMG400014614	PGSC0003DMT400037882	antisense	intergenic	400	convergent	downstream
MSTRG.22057.2	StLNC1903	PGSC0003DMG400042188	PGSC0003DMT400092617	antisense	intergenic	6595	divergent	upstream
MSTRG.24845.1	StLNC1904	PGSC0003DMG400010458	PGSC0003DMT400027113	sense	intergenic	1184	same_strand	upstream
MSTRG.80.18	StLNC1905	PGSC0003DMG400032127	PGSC0003DMT400081823	sense	intergenic	12442	same_strand	upstream
MSTRG.14921.1	StLNC1906	PGSC0003DMG400010876	PGSC0003DMT400028200	sense	intergenic	11384	same_strand	downstream
MSTRG.1469.1	StLNC1907	PGSC0003DMG400009016	PGSC0003DMT400023279	antisense	intergenic	3781	convergent	downstream
MSTRG.13126.1	StLNC1908	PGSC0003DMG400017444	PGSC0003DMT400044981	sense	intergenic	10044	same_strand	upstream
MSTRG.7256.7	StLNC1909	PGSC0003DMG400011964	PGSC0003DMT400031233	antisense	intergenic	1804	divergent	upstream
MSTRG.19415.2	StLNC1910	PGSC0003DMG400039179	PGSC0003DMT400089608	antisense	intergenic	5131	divergent	upstream
MSTRG.21241.1	StLNC1911	PGSC0003DMG402008909	PGSC0003DMT400023016	antisense	genic	0	containing	exonic
MSTRG.5833.2	StLNC1912	PGSC0003DMG400030593	PGSC0003DMT400078609	sense	intergenic	4489	same_strand	upstream
MSTRG.9731.1	StLNC1913	PGSC0003DMG400029496	PGSC0003DMT400075863	antisense	genic	0	containing	intronic
MSTRG.16934.2	StLNC1914	PGSC0003DMG400027450	PGSC0003DMT400070616	antisense	genic	0	overlapping	exonic
MSTRG.24281.2	StLNC1915	PGSC0003DMG400040052	PGSC0003DMT400090481	sense	intergenic	38907	same_strand	downstream
MSTRG.21950.1	StLNC1916	PGSC0003DMG400015026	PGSC0003DMT400038877	antisense	intergenic	3670	convergent	downstream
MSTRG.28619.1	StLNC1917	PGSC0003DMG400028615	PGSC0003DMT400073669	antisense	genic	0	nested	exonic
MSTRG.26408.5	StLNC1918	PGSC0003DMG400017128	PGSC0003DMT400044129	sense	intergenic	863	same_strand	upstream
MSTRG.1135.2	StLNC1919	PGSC0003DMG400013124	PGSC0003DMT400034158	sense	intergenic	3237	same_strand	downstream
MSTRG.19915.2	StLNC1920	PGSC0003DMG400029085	PGSC0003DMT400074804	antisense	genic	0	overlapping	exonic
MSTRG.28320.6	StLNC1921	PGSC0003DMG400002364	PGSC0003DMT400006086	antisense	genic	0	nested	exonic
MSTRG.1215.3	StLNC1922	PGSC0003DMG400011334	PGSC0003DMT400029476	antisense	intergenic	2391	divergent	upstream
MSTRG.22836.4	StLNC1923	PGSC0003DMG400017187	PGSC0003DMT400044245	antisense	intergenic	4262	divergent	upstream
MSTRG.6659.1	StLNC1924	PGSC0003DMG400026748	PGSC0003DMT400068782	antisense	genic	0	overlapping	intronic
MSTRG.11254.19	StLNC1925	PGSC0003DMG400000782	PGSC0003DMT400002049	antisense	genic	0	overlapping	exonic
MSTRG.28296.28	StLNC1926	PGSC0003DMG400014999	PGSC0003DMT400038813	antisense	intergenic	83620	convergent	downstream
MSTRG.3483.29	StLNC1927	PGSC0003DMG400025186	PGSC0003DMT400064863	antisense	intergenic	286	convergent	downstream
MSTRG.3769.2	StLNC1928	PGSC0003DMG400005100	PGSC0003DMT400013073	antisense	genic	0	containing	intronic
MSTRG.11254.4	StLNC1929	PGSC0003DMG400000776	PGSC0003DMT400002035	antisense	genic	0	overlapping	exonic
MSTRG.28479.2	StLNC1930	PGSC0003DMG400000656	PGSC0003DMT400001756	sense	intergenic	281	same_strand	downstream
MSTRG.28503.1	StLNC1931	PGSC0003DMG400035751	PGSC0003DMT400086180	antisense	intergenic	18625	divergent	upstream
MSTRG.17258.43	StLNC1932	PGSC0003DMG400009565	PGSC0003DMT400024747	sense	genic	0	containing	intronic
MSTRG.22646.2	StLNC1933	PGSC0003DMG400031807	PGSC0003DMT400081366	antisense	intergenic	6637	convergent	downstream
MSTRG.23245.59	StLNC1934	PGSC0003DMG400021603	PGSC0003DMT400055632	antisense	genic	0	nested	exonic
MSTRG.4885.1	StLNC1935	PGSC0003DMG400028451	PGSC0003DMT400073221	sense	intergenic	34152	same_strand	downstream
MSTRG.885.1	StLNC1936	PGSC0003DMG400014983	PGSC0003DMT400038770	antisense	intergenic	15842	convergent	downstream
MSTRG.24887.1	StLNC1937	PGSC0003DMG400028268	PGSC0003DMT400072645	antisense	intergenic	6940	divergent	upstream
MSTRG.19960.4	StLNC1938	PGSC0003DMG400007371	PGSC0003DMT400019020	sense	intergenic	2876	same_strand	upstream
MSTRG.18452.1	StLNC1939	PGSC0003DMG400007093	PGSC0003DMT400018279	sense	intergenic	4159	same_strand	downstream
MSTRG.24750.2	StLNC1940	PGSC0003DMG400011091	PGSC0003DMT400028807	sense	intergenic	1239	same_strand	upstream
MSTRG.19280.1	StLNC1941	PGSC0003DMG400039843	PGSC0003DMT400090272	sense	intergenic	9062	same_strand	upstream
MSTRG.19415.3	StLNC1942	PGSC0003DMG400039179	PGSC0003DMT400089608	antisense	intergenic	5565	divergent	upstream
MSTRG.26767.2	StLNC1943	PGSC0003DMG400000406	PGSC0003DMT400001073	sense	intergenic	876	same_strand	upstream
MSTRG.10473.1	StLNC1944	PGSC0003DMG400040032	PGSC0003DMT400090461	antisense	intergenic	5958	divergent	upstream
MSTRG.11279.3	StLNC1945	PGSC0003DMG400008615	PGSC0003DMT400022199	sense	intergenic	694	same_strand	downstream
MSTRG.15262.10	StLNC1946	PGSC0003DMG400042570	PGSC0003DMT400092999	antisense	genic	0	overlapping	exonic
MSTRG.27806.1	StLNC1947	PGSC0003DMG400018961	PGSC0003DMT400048787	sense	intergenic	4692	same_strand	downstream
MSTRG.2840.1	StLNC1948	PGSC0003DMG400018265	PGSC0003DMT400047030	antisense	genic	0	containing	intronic
MSTRG.528.1	StLNC1949	PGSC0003DMG400005234	PGSC0003DMT400013416	sense	intergenic	34	same_strand	upstream
MSTRG.11123.2	StLNC1950	PGSC0003DMG400009839	PGSC0003DMT400025486	sense	genic	0	containing	intronic
MSTRG.22744.1	StLNC1951	PGSC0003DMG404006439	PGSC0003DMT400016484	sense	intergenic	1153	same_strand	upstream
MSTRG.19015.1	StLNC1952	PGSC0003DMG400026271	PGSC0003DMT400067568	antisense	intergenic	1544	divergent	upstream
MSTRG.5792.2	StLNC1953	PGSC0003DMG400012667	PGSC0003DMT400032979	antisense	intergenic	834	divergent	upstream
MSTRG.17115.1	StLNC1954	PGSC0003DMG400018012	PGSC0003DMT400046413	sense	intergenic	65	same_strand	downstream
MSTRG.13502.1	StLNC1955	PGSC0003DMG400014959	PGSC0003DMT400038710	sense	intergenic	16003	same_strand	upstream
MSTRG.620.1	StLNC1956	PGSC0003DMG400001011	PGSC0003DMT400002631	sense	intergenic	2516	same_strand	upstream
MSTRG.12666.1	StLNC1957	PGSC0003DMG400018428	PGSC0003DMT400047416	sense	intergenic	15611	same_strand	downstream
MSTRG.25728.1	StLNC1958	PGSC0003DMG400027315	PGSC0003DMT400070250	sense	intergenic	6574	same_strand	downstream
MSTRG.17336.2	StLNC1959	PGSC0003DMG400022092	PGSC0003DMT400056808	sense	intergenic	7686	same_strand	upstream
MSTRG.4889.1	StLNC1960	PGSC0003DMG400028451	PGSC0003DMT400073221	antisense	intergenic	11263	convergent	downstream
MSTRG.25361.1	StLNC1961	PGSC0003DMG400013351	PGSC0003DMT400034750	sense	intergenic	5229	same_strand	downstream
MSTRG.12365.4	StLNC1962	PGSC0003DMG400005586	PGSC0003DMT400014246	sense	intergenic	4531	same_strand	downstream
MSTRG.1175.1	StLNC1963	PGSC0003DMG400018972	PGSC0003DMT400048829	sense	intergenic	3368	same_strand	downstream
MSTRG.4887.2	StLNC1964	PGSC0003DMG400028451	PGSC0003DMT400073221	antisense	genic	0	containing	intronic
MSTRG.15012.9	StLNC1965	PGSC0003DMG400021581	PGSC0003DMT400055564	antisense	intergenic	1431	divergent	upstream
MSTRG.12603.4	StLNC1966	PGSC0003DMG402030517	PGSC0003DMT400078381	sense	intergenic	116	same_strand	downstream
MSTRG.23913.4	StLNC1967	PGSC0003DMG400018983	PGSC0003DMT400048853	antisense	genic	0	containing	intronic
MSTRG.22066.6	StLNC1968	PGSC0003DMG400029011	PGSC0003DMT400074622	sense	intergenic	797	same_strand	upstream
MSTRG.29317.180	StLNC1969	PGSC0003DMG400004593	PGSC0003DMT400011693	antisense	intergenic	6571	divergent	upstream
MSTRG.23528.1	StLNC1970	PGSC0003DMG400006719	PGSC0003DMT400017240	sense	intergenic	6314	same_strand	upstream
MSTRG.9431.1	StLNC1971	PGSC0003DMG400014027	PGSC0003DMT400036428	sense	intergenic	2998	same_strand	upstream
MSTRG.3492.4	StLNC1972	PGSC0003DMG400025172	PGSC0003DMT400064813	antisense	intergenic	321	convergent	downstream
MSTRG.26463.1	StLNC1973	PGSC0003DMG400044024	PGSC0003DMT400094453	sense	intergenic	4487	same_strand	downstream
MSTRG.3483.18	StLNC1974	PGSC0003DMG400025186	PGSC0003DMT400064863	antisense	intergenic	288	convergent	downstream
MSTRG.21195.1	StLNC1975	PGSC0003DMG400008888	PGSC0003DMT400022940	sense	intergenic	270	same_strand	downstream
MSTRG.3125.2	StLNC1976	PGSC0003DMG400012575	PGSC0003DMT400032753	antisense	genic	0	overlapping	exonic
MSTRG.74.6	StLNC1977	PGSC0003DMG400032169	PGSC0003DMT400081953	sense	intergenic	28683	same_strand	upstream
MSTRG.4820.1	StLNC1978	PGSC0003DMG400003085	PGSC0003DMT400007978	antisense	intergenic	5822	convergent	downstream
MSTRG.26573.1	StLNC1979	PGSC0003DMG400013603	PGSC0003DMT400035393	sense	intergenic	4696	same_strand	downstream
MSTRG.7282.1	StLNC1980	PGSC0003DMG400042470	PGSC0003DMT400092899	antisense	intergenic	60385	divergent	upstream
MSTRG.29283.3	StLNC1981	PGSC0003DMG400004663	PGSC0003DMT400011873	sense	intergenic	8911	same_strand	upstream
MSTRG.21650.1	StLNC1982	PGSC0003DMG400023925	PGSC0003DMT400061484	antisense	intergenic	190	convergent	downstream
MSTRG.7030.1	StLNC1983	PGSC0003DMG400003362	PGSC0003DMT400008673	antisense	intergenic	13042	divergent	upstream
MSTRG.3483.20	StLNC1984	PGSC0003DMG400025186	PGSC0003DMT400064863	antisense	intergenic	319	convergent	downstream
MSTRG.5795.1	StLNC1985	PGSC0003DMG400026396	PGSC0003DMT400067866	antisense	genic	0	containing	intronic
MSTRG.28141.1	StLNC1986	PGSC0003DMG400020376	PGSC0003DMT400052512	sense	intergenic	7550	same_strand	upstream
MSTRG.6780.1	StLNC1987	PGSC0003DMG401024077	PGSC0003DMT400061878	sense	intergenic	81	same_strand	upstream
MSTRG.23245.80	StLNC1988	PGSC0003DMG400021603	PGSC0003DMT400055632	antisense	genic	0	nested	exonic
MSTRG.80.17	StLNC1989	PGSC0003DMG400032127	PGSC0003DMT400081823	sense	intergenic	12390	same_strand	upstream
MSTRG.12365.7	StLNC1990	PGSC0003DMG400005586	PGSC0003DMT400014246	sense	intergenic	4529	same_strand	downstream
MSTRG.29313.35	StLNC1991	PGSC0003DMG400004676	PGSC0003DMT400011910	antisense	genic	0	nested	exonic
MSTRG.21848.2	StLNC1992	PGSC0003DMG400030270	PGSC0003DMT400077817	antisense	intergenic	26463	convergent	downstream
MSTRG.28296.26	StLNC1993	PGSC0003DMG400021934	PGSC0003DMT400056456	sense	intergenic	88648	same_strand	downstream
MSTRG.26237.1	StLNC1994	PGSC0003DMG400009264	PGSC0003DMT400023954	antisense	intergenic	21696	convergent	downstream
MSTRG.12669.1	StLNC1995	PGSC0003DMG400018429	PGSC0003DMT400047418	antisense	genic	0	overlapping	exonic
MSTRG.19340.1	StLNC1996	PGSC0003DMG400025206	PGSC0003DMT400064904	antisense	intergenic	16085	divergent	upstream
MSTRG.25407.7	StLNC1997	PGSC0003DMG400036408	PGSC0003DMT400086837	antisense	genic	0	containing	intronic
MSTRG.21722.1	StLNC1998	PGSC0003DMG400006255	PGSC0003DMT400015994	sense	intergenic	1242	same_strand	downstream
MSTRG.27066.3	StLNC1999	PGSC0003DMG400018572	PGSC0003DMT400047775	sense	intergenic	2191	same_strand	upstream
[truncated: 858 more rows]
