# Supplementary material for: Genome-Wide Identification and Characterization of Potato Long Non-coding RNAs Associated With Phytophthora infestans Resistance
Source: Front Plant Sci. 2021 Feb 10;12:619062. doi: 10.3389/fpls.2021.619062 (PMC7902931; doi:10.3389/fpls.2021.619062)
Supplement: Supplementary Table 7 — Alternative splicing (AS) event analysis of all lncRNAs. [file Table_7.XLSX]

## Sheet: s7
Chr	AS	Start	End	Strand	Infomation
ST4.03ch01	as_event	1179573	1179895	+	transcript_id "StLNC1145,StLNC2753"; gene_id "ST4.03ch01:1179263-1263334W"; flanks "1179573[,1179895^"; structure "0,1^2-"; splice_chain ",1179692^1179760-"; sources "Undefined,Undefined"; NMorMRNA "null"; degree "4"; dimension "2_2";
ST4.03ch01	as_event	1180007	1180293	+	transcript_id "StLNC1189,StLNC2753/StLNC1145"; gene_id "ST4.03ch01:1179263-1263334W"; flanks "1180007-,1180293^"; structure "0,1^2-"; splice_chain ",1180073^1180166-"; sources "Undefined,Undefined"; NMorMRNA "null"; degree "4"; dimension "2_2";
ST4.03ch01	as_event	1181147	1182012	+	transcript_id "StLNC2753,StLNC1189"; gene_id "ST4.03ch01:1179263-1263334W"; flanks "1181147-,1182012^"; structure "0,1^2-"; splice_chain ",1181723^1181946-"; sources "Undefined,Undefined"; NMorMRNA "null"; degree "4"; dimension "2_2";
ST4.03ch01	as_event	1202853	1203077	+	transcript_id "StLNC2100,StLNC1635"; gene_id "ST4.03ch01:1179263-1263334W"; flanks "1202853^,1203077^"; structure "1-,2-"; splice_chain "1202942-,1202951-"; sources "Undefined,Undefined"; NMorMRNA "null"; degree "4"; dimension "2_2";
ST4.03ch01	as_event	1179692	1203617	+	transcript_id "StLNC2853,StLNC0901"; gene_id "ST4.03ch01:1179263-1263334W"; flanks "1179692^,1203617^"; structure "1-2^4-,3-"; splice_chain "1179760-1179775^1202958-,1202942-"; sources "Undefined,Undefined"; NMorMRNA "null"; degree "4"; dimension "2_2";
ST4.03ch01	as_event	1204208	1204380	+	transcript_id "StLNC0518/StLNC2485/StLNC0552,StLNC2229/StLNC0338"; gene_id "ST4.03ch01:1179263-1263334W"; flanks "1204208^,1204380^"; structure "1-,2-"; splice_chain "1204295-,1204302-"; sources "Undefined,Undefined"; NMorMRNA "null"; degree "4"; dimension "2_2";
ST4.03ch01	as_event	1204466	1204898	+	transcript_id "StLNC0518/StLNC0338,StLNC0738"; gene_id "ST4.03ch01:1179263-1263334W"; flanks "1204466-,1204898^"; structure "0,1^2-"; splice_chain ",1204690^1204762-"; sources "Undefined,Undefined"; NMorMRNA "null"; degree "4"; dimension "2_2";
ST4.03ch01	as_event	1204466	1205100	+	transcript_id "StLNC2229,StLNC0518/StLNC0338"; gene_id "ST4.03ch01:1179263-1263334W"; flanks "1204466-,1205100]"; structure "0,1^2-"; splice_chain ",1204898^1204966-"; sources "Undefined,Undefined"; NMorMRNA "null"; degree "4"; dimension "2_2";
ST4.03ch01	as_event	1179692	1239080	+	transcript_id "StLNC0471,StLNC1989"; gene_id "ST4.03ch01:1179263-1263334W"; flanks "1179692^,1239080^"; structure "1-2^5-,3-4^6-"; splice_chain "1179760-1179895^1239014-,1202942-1203225^1239059-"; sources "Undefined,Undefined"; NMorMRNA "null"; degree "4"; dimension "2_2";
ST4.03ch01	as_event	1202942	1239173	+	transcript_id "StLNC1989/StLNC0374,StLNC2820"; gene_id "ST4.03ch01:1179263-1263334W"; flanks "1202942-,1239173-"; structure "1^3-4^,2^"; splice_chain "1203225^1239059-1239080^,1203247^"; sources "Undefined,Undefined"; NMorMRNA "null"; degree "4"; dimension "2_2";
ST4.03ch01	as_event	1179692	1239173	+	transcript_id "StLNC0471,StLNC1989,StLNC2820"; gene_id "ST4.03ch01:1179263-1263334W"; flanks "1179692^,1239173-"; structure "1-2^6-8^,3-4^7-8^,3-5^"; splice_chain "1179760-1179895^1239014-1239080^,1202942-1203225^1239059-1239080^,1202942-1203247^"; sources "Undefined,Undefined,Undefined"; NMorMRNA "null"; degree "9"; dimension "3_3";
ST4.03ch01	as_event	1179692	1239654	+	transcript_id "StLNC2853,StLNC1989,StLNC2820"; gene_id "ST4.03ch01:1179263-1263334W"; flanks "1179692^,1239654-"; structure "1-2^4-7^,3-5^8-9^10-11^,3-6^10-11^"; splice_chain "1179760-1179775^1202958-1203617^,1202942-1203225^1239059-1239080^1239173-1239429^,1202942-1203247^1239173-1239429^"; sources "Undefined,Undefined,Undefined"; NMorMRNA "null"; degree "9"; dimension "3_3";
ST4.03ch01	as_event	20419442	20421076	+	transcript_id "StLNC0500,StLNC2380"; gene_id "ST4.03ch01:20414586-20421076W"; flanks "20419442-,20421076]"; structure "0,1^2-"; splice_chain ",20419576^20419717-"; sources "Undefined,Undefined"; NMorMRNA "null"; degree "4"; dimension "2_2";
ST4.03ch01	as_event	45938873	45939042	+	transcript_id "StLNC0913,StLNC2434"; gene_id "ST4.03ch01:45938594-45944931W"; flanks "45938873^,45939042^"; structure "1-,2-"; splice_chain "45938965-,45938974-"; sources "Undefined,Undefined"; NMorMRNA "null"; degree "4"; dimension "2_2";
ST4.03ch01	as_event	57716768	57717254	+	transcript_id "StLNC1680/StLNC1154/StLNC1846,StLNC0767/StLNC0334"; gene_id "ST4.03ch01:57715620-57720813W"; flanks "57716768-,57717254^"; structure "0,1^2-"; splice_chain ",57716875^57717146-"; sources "Undefined,Undefined"; NMorMRNA "null"; degree "4"; dimension "2_2";
ST4.03ch01	as_event	57718262	57720520	+	transcript_id "StLNC1680/StLNC0767,StLNC0334"; gene_id "ST4.03ch01:57715620-57720813W"; flanks "57718262^,57720520-"; structure "0,1-2^"; splice_chain ",57718599-57718703^"; sources "Undefined,Undefined"; NMorMRNA "null"; degree "4"; dimension "2_2";
ST4.03ch01	as_event	57718262	57720813	+	transcript_id "StLNC0334,StLNC1680/StLNC0767,StLNC1846"; gene_id "ST4.03ch01:57715620-57720813W"; flanks "57718262^,57720813]"; structure "1-2^3-,3-,4-"; splice_chain "57718599-57718703^57720520-,57720520-,57720599-"; sources "Undefined,Undefined,Undefined"; NMorMRNA "null"; degree "9"; dimension "3_3";
ST4.03ch01	as_event	57718082	57720813	+	transcript_id "StLNC0334,StLNC1680/StLNC0767,StLNC1846,StLNC1154"; gene_id "ST4.03ch01:57715620-57720813W"; flanks "57718082-,57720813]"; structure "1^2-3^6-,1^6-,1^7-,4^5-"; splice_chain "57718262^57718599-57718703^57720520-,57718262^57720520-,57718262^57720599-,57718927^57718986-"; sources "Undefined,Undefined,Undefined,Undefined"; NMorMRNA "null"; degree "16"; dimension "4_4";
ST4.03ch01	as_event	58554746	58555059	+	transcript_id "StLNC1120,StLNC1459"; gene_id "ST4.03ch01:58458336-58557006W"; flanks "58554746-,58555059^"; structure "0,1^2-"; splice_chain ",58554895^58554974-"; sources "Undefined,Undefined"; NMorMRNA "null"; degree "4"; dimension "2_2";
ST4.03ch01	as_event	58555508	58555831	+	transcript_id "StLNC1120,StLNC2488"; gene_id "ST4.03ch01:58458336-58557006W"; flanks "58555508^,58555831]"; structure "1-,2-"; splice_chain "58555687-,58555692-"; sources "Undefined,Undefined"; NMorMRNA "null"; degree "4"; dimension "2_2";
ST4.03ch01	as_event	65527474	65538372	+	transcript_id "StLNC2306,StLNC0811"; gene_id "ST4.03ch01:65516606-65618429W"; flanks "65527474^,65538372^"; structure "1-,2-"; splice_chain "65538103-,65538302-"; sources "Undefined,Undefined"; NMorMRNA "null"; degree "4"; dimension "2_2";
ST4.03ch01	as_event	65579156	65579626	+	transcript_id "StLNC1798,StLNC0506"; gene_id "ST4.03ch01:65516606-65618429W"; flanks "65579156-,65579626^"; structure "0,1^2-"; splice_chain ",65579283^65579370-"; sources "Undefined,Undefined"; NMorMRNA "null"; degree "4"; dimension "2_2";
ST4.03ch01	as_event	65580719	65583591	+	transcript_id "StLNC0506,StLNC1798"; gene_id "ST4.03ch01:65516606-65618429W"; flanks "65580719-,65583591-"; structure "1^,2^"; splice_chain "65581049^,65581074^"; sources "Undefined,Undefined"; NMorMRNA "null"; degree "4"; dimension "2_2";
ST4.03ch01	as_event	65540571	65586338	+	transcript_id "StLNC0811,StLNC2306"; gene_id "ST4.03ch01:65516606-65618429W"; flanks "65540571^,65586338-"; structure "1-2^,3-4^"; splice_chain "65542971-65543063^,65586166-65586258^"; sources "Undefined,Undefined"; NMorMRNA "null"; degree "4"; dimension "2_2";
ST4.03ch01	as_event	65611221	65611408	+	transcript_id "StLNC0596,StLNC0213"; gene_id "ST4.03ch01:65516606-65618429W"; flanks "65611221^,65611408^"; structure "1-,2-"; splice_chain "65611301-,65611306-"; sources "Undefined,Undefined"; NMorMRNA "null"; degree "4"; dimension "2_2";
ST4.03ch01	as_event	68309808	68310516	+	transcript_id "StLNC0720,StLNC0347"; gene_id "ST4.03ch01:68309808-68321622W"; flanks "68309808[,68310516^"; structure "0,1^2-"; splice_chain ",68310271^68310474-"; sources "Undefined,Undefined"; NMorMRNA "null"; degree "4"; dimension "2_2";
ST4.03ch01	as_event	70226933	70227517	+	transcript_id "StLNC1356,StLNC2181"; gene_id "ST4.03ch01:70224430-70227517W"; flanks "70226933-,70227517]"; structure "0,1^2-"; splice_chain ",70227155^70227263-"; sources "Undefined,Undefined"; NMorMRNA "null"; degree "4"; dimension "2_2";
ST4.03ch01	as_event	76154664	76154989	+	transcript_id "StLNC0886,StLNC1226"; gene_id "ST4.03ch01:76154312-76156390W"; flanks "76154664^,76154989-"; structure "0,1-2^"; splice_chain ",76154742-76154870^"; sources "Undefined,Undefined"; NMorMRNA "null"; degree "4"; dimension "2_2";
ST4.03ch01	as_event	85670546	85670933	+	transcript_id "StLNC1110/StLNC0898,StLNC0035/StLNC0425/StLNC1101/StLNC2212"; gene_id "ST4.03ch01:85669824-85679318W"; flanks "85670546^,85670933^"; structure "1-,2-"; splice_chain "85670627-,85670827-"; sources "Undefined,Undefined"; NMorMRNA "null"; degree "4"; dimension "2_2";
ST4.03ch01	as_event	85672652	85673360	+	transcript_id "StLNC0425/StLNC1101,StLNC0035/StLNC2654/StLNC0282/StLNC0899/StLNC1110/StLNC2212/StLNC0898"; gene_id "ST4.03ch01:85669824-85679318W"; flanks "85672652-,85673360^"; structure "0,1^2-"; splice_chain ",85673170^85673266-"; sources "Undefined,Undefined"; NMorMRNA "null"; degree "4"; dimension "2_2";
ST4.03ch01	as_event	85673360	85674328	+	transcript_id "StLNC1469,StLNC0035/StLNC2654/StLNC0898"; gene_id "ST4.03ch01:85669824-85679318W"; flanks "85673360^,85674328^"; structure "1-,2-"; splice_chain "85673907-,85673943-"; sources "Undefined,Undefined"; NMorMRNA "null"; degree "4"; dimension "2_2";
ST4.03ch01	as_event	85673360	85675481	+	transcript_id "StLNC0282/StLNC0899/StLNC1110/StLNC0425/StLNC2212,StLNC1469,StLNC0035/StLNC2654/StLNC0898"; gene_id "ST4.03ch01:85669824-85679318W"; flanks "85673360^,85675481-"; structure "0,1-3^,2-3^"; splice_chain ",85673907-85674328^,85673943-85674328^"; sources "Undefined,Undefined,Undefined"; NMorMRNA "null"; degree "9"; dimension "3_3";
ST4.03ch01	as_event	85675782	85675980	+	transcript_id "StLNC1318,StLNC0035/StLNC2654/StLNC0282/StLNC0899/StLNC1469/StLNC2390/StLNC2115/StLNC1974/StLNC0016/StLNC1984/StLNC0339/StLNC0203/StLNC1884/StLNC1581/StLNC1673/StLNC1110/StLNC0425/StLNC2212/StLNC0898"; gene_id "ST4.03ch01:85669824-85679318W"; flanks "85675782-,85675980^"; structure "0,1^2-"; splice_chain ",85675839^85675923-"; sources "Undefined,Undefined"; NMorMRNA "null"; degree …
ST4.03ch01	as_event	85675980	85676172	+	transcript_id "StLNC0035/StLNC2654/StLNC0282/StLNC1469/StLNC2115/StLNC1318/StLNC1974/StLNC0016/StLNC1984/StLNC1581/StLNC1692/StLNC1927/StLNC1110/StLNC0425/StLNC2212/StLNC0898,StLNC0899/StLNC2390/StLNC0339/StLNC0203/StLNC1884/StLNC1673/StLNC2066/StLNC2189"; gene_id "ST4.03ch01:85669824-85679318W"; flanks "85675980^,85676172^"; structure "1-,2-"; splice_chain "85676096-,85676103-"; sources "Undefin…
ST4.03ch01	as_event	85677523	85677677	+	transcript_id "StLNC0899/StLNC2115/StLNC1318/StLNC1974,StLNC0282/StLNC1469/StLNC2390/StLNC1692/StLNC2066/StLNC2189/StLNC1927/StLNC1110/StLNC0425/StLNC2212/StLNC0898"; gene_id "ST4.03ch01:85669824-85679318W"; flanks "85677523^,85677677^"; structure "1-,2-"; splice_chain "85677624-,85677644-"; sources "Undefined,Undefined"; NMorMRNA "null"; degree "4"; dimension "2_2";
ST4.03ch01	as_event	85677523	85677752	+	transcript_id "StLNC0035/StLNC0016/StLNC1984/StLNC0339/StLNC0203/StLNC1884/StLNC1581/StLNC1673,StLNC0899/StLNC2115/StLNC1318/StLNC1974,StLNC0282/StLNC1469/StLNC2390/StLNC1692/StLNC2066/StLNC2189/StLNC1927/StLNC1110/StLNC0425/StLNC2212/StLNC0898"; gene_id "ST4.03ch01:85669824-85679318W"; flanks "85677523^,85677752-"; structure "0,1-3^,2-3^"; splice_chain ",85677624-85677677^,85677644-85677677^"; s…
ST4.03ch01	as_event	85677395	85677969	+	transcript_id "StLNC2654,StLNC0899/StLNC2115/StLNC1318/StLNC1974,StLNC0282/StLNC1469/StLNC2390/StLNC1692/StLNC2066/StLNC2189/StLNC1927/StLNC1110/StLNC0425/StLNC2212/StLNC0898,StLNC0035/StLNC0016/StLNC1984/StLNC0339/StLNC0203/StLNC1884/StLNC1581/StLNC1673"; gene_id "ST4.03ch01:85669824-85679318W"; flanks "85677395-,85677969^"; structure "0,1^2-4^5-,1^3-4^5-,1^5-"; splice_chain ",85677523^85677624-…
ST4.03ch01	as_event	85677969	85678435	+	transcript_id "StLNC0282/StLNC0899/StLNC2115/StLNC1318/StLNC0016/StLNC0425,StLNC0035/StLNC1469/StLNC2390/StLNC1974/StLNC0339/StLNC1581/StLNC1673/StLNC2066/StLNC1110/StLNC2212/StLNC0898"; gene_id "ST4.03ch01:85669824-85679318W"; flanks "85677969^,85678435^"; structure "1-,2-"; splice_chain "85678284-,85678351-"; sources "Undefined,Undefined"; NMorMRNA "null"; degree "4"; dimension "2_2";
ST4.03ch01	as_event	85677969	85678910	+	transcript_id "StLNC2654/StLNC1984/StLNC1884/StLNC1692/StLNC2189/StLNC1927,StLNC0282/StLNC0899/StLNC2115/StLNC1318/StLNC0016/StLNC0425,StLNC0035/StLNC1469/StLNC2390/StLNC1974/StLNC0339/StLNC1581/StLNC1673/StLNC2066/StLNC1110/StLNC2212/StLNC0898"; gene_id "ST4.03ch01:85669824-85679318W"; flanks "85677969^,85678910-"; structure "0,1-3^,2-3^"; splice_chain ",85678284-85678435^,85678351-85678435^"; s…
ST4.03ch01	as_event	85755065	85756719	+	transcript_id "StLNC1057,StLNC1972"; gene_id "ST4.03ch01:85754590-85757763W"; flanks "85755065^,85756719^"; structure "1-,2-"; splice_chain "85756434-,85756601-"; sources "Undefined,Undefined"; NMorMRNA "null"; degree "4"; dimension "2_2";
ST4.03ch01	as_event	85756434	85756892	+	transcript_id "StLNC1534,StLNC1057"; gene_id "ST4.03ch01:85754590-85757763W"; flanks "85756434-,85756892-"; structure "1^,2^"; splice_chain "85756572^,85756719^"; sources "Undefined,Undefined"; NMorMRNA "null"; degree "4"; dimension "2_2";
ST4.03ch01	as_event	85755065	85756892	+	transcript_id "StLNC1534,StLNC1057,StLNC1972"; gene_id "ST4.03ch01:85754590-85757763W"; flanks "85755065^,85756892-"; structure "1-2^,1-4^,3-4^"; splice_chain "85756434-85756572^,85756434-85756719^,85756601-85756719^"; sources "Undefined,Undefined,Undefined"; NMorMRNA "null"; degree "9"; dimension "3_3";
ST4.03ch01	as_event	88275227	88276085	+	transcript_id "StLNC1604/StLNC1657,StLNC0540/StLNC0751"; gene_id "ST4.03ch01:88274662-88278231W"; flanks "88275227^,88276085-"; structure "0,1-2^"; splice_chain ",88275699-88275767^"; sources "Undefined,Undefined"; NMorMRNA "null"; degree "4"; dimension "2_2";
ST4.03ch01	as_event	88276085	88277662	+	transcript_id "StLNC1604/StLNC0540/StLNC0751,StLNC1657"; gene_id "ST4.03ch01:88274662-88278231W"; flanks "88276085-,88277662-"; structure "1^,2^"; splice_chain "88276221^,88277004^"; sources "Undefined,Undefined"; NMorMRNA "null"; degree "4"; dimension "2_2";
ST4.03ch01	as_event	88284653	88284823	+	transcript_id "StLNC0799,StLNC0155"; gene_id "ST4.03ch01:88281614-88284823W"; flanks "88284653^,88284823]"; structure "1-,2-"; splice_chain "88284742-,88284776-"; sources "Undefined,Undefined"; NMorMRNA "null"; degree "4"; dimension "2_2";
ST4.03ch01	as_event	24770151	24771804	-	transcript_id "StLNC1630,StLNC1379"; gene_id "ST4.03ch01:24767832-24772663C"; flanks "24771804-,24770151^"; structure "0,1^2-3^4-"; splice_chain ",24771482^24770843-24770713^24770614-"; sources "Undefined,Undefined"; NMorMRNA "null"; degree "4"; dimension "2_2";
ST4.03ch01	as_event	35624818	35632228	-	transcript_id "StLNC1471,StLNC0571"; gene_id "ST4.03ch01:35623214-35632484C"; flanks "35632228^,35624818-"; structure "0,1-2^"; splice_chain ",35631249-35631155^"; sources "Undefined,Undefined"; NMorMRNA "null"; degree "4"; dimension "2_2";
ST4.03ch01	as_event	35624735	35632228	-	transcript_id "StLNC2222,StLNC1471"; gene_id "ST4.03ch01:35623214-35632484C"; flanks "35632228^,35624735]"; structure "1-,2-"; splice_chain "35624843-,35624818-"; sources "Undefined,Undefined"; NMorMRNA "null"; degree "4"; dimension "2_2";
ST4.03ch01	as_event	35623869	35631155	-	transcript_id "StLNC2655,StLNC2184,StLNC0227"; gene_id "ST4.03ch01:35623214-35632484C"; flanks "35631155^,35623869^"; structure "1-,2-,3-"; splice_chain "35624090-,35623969-,35623964-"; sources "Undefined,Undefined,Undefined"; NMorMRNA "null"; degree "9"; dimension "3_3";
ST4.03ch01	as_event	35623534	35631155	-	transcript_id "StLNC2544,StLNC2184,StLNC0517"; gene_id "ST4.03ch01:35623214-35632484C"; flanks "35631155^,35623534]"; structure "1-,2-4^5-,3-"; splice_chain "35624090-,35623969-35623869^35623730-,35623964-"; sources "Undefined,Undefined,Undefined"; NMorMRNA "null"; degree "9"; dimension "3_3";
ST4.03ch01	as_event	35623214	35631155	-	transcript_id "StLNC1310,StLNC2481"; gene_id "ST4.03ch01:35623214-35632484C"; flanks "35631155^,35623214]"; structure "1-,2-"; splice_chain "35624090-,35623969-"; sources "Undefined,Undefined"; NMorMRNA "null"; degree "4"; dimension "2_2";
ST4.03ch01	as_event	37510958	37514343	-	transcript_id "StLNC1205,StLNC0059/StLNC1776"; gene_id "ST4.03ch01:37510437-37526212C"; flanks "37514343^,37510958-"; structure "0,1-2^"; splice_chain ",37512418-37512346^"; sources "Undefined,Undefined"; NMorMRNA "null"; degree "4"; dimension "2_2";
ST4.03ch01	as_event	45416196	45417260	-	transcript_id "StLNC2259,StLNC2388"; gene_id "ST4.03ch01:45413849-45417644C"; flanks "45417260^,45416196^"; structure "1-,2-"; splice_chain "45416369-,45416366-"; sources "Undefined,Undefined"; NMorMRNA "null"; degree "4"; dimension "2_2";
ST4.03ch01	as_event	46732287	46732953	-	transcript_id "StLNC2352,StLNC2545"; gene_id "ST4.03ch01:46728805-46733202C"; flanks "46732953^,46732287-"; structure "0,1-2^"; splice_chain ",46732867-46732827^"; sources "Undefined,Undefined"; NMorMRNA "null"; degree "4"; dimension "2_2";
ST4.03ch01	as_event	46732287	46733202	-	transcript_id "StLNC2352,StLNC1215"; gene_id "ST4.03ch01:46728805-46733202C"; flanks "46733202[,46732287-"; structure "1^,2^"; splice_chain "46732953^,46732827^"; sources "Undefined,Undefined"; NMorMRNA "null"; degree "4"; dimension "2_2";
ST4.03ch01	as_event	52874740	52876109	-	transcript_id "StLNC1919,StLNC1574"; gene_id "ST4.03ch01:52874699-52876558C"; flanks "52876109^,52874740-"; structure "0,1-2^"; splice_chain ",52875405-52875316^"; sources "Undefined,Undefined"; NMorMRNA "null"; degree "4"; dimension "2_2";
ST4.03ch01	as_event	61691167	61692231	-	transcript_id "StLNC2791,StLNC2517"; gene_id "ST4.03ch01:61686649-61692231C"; flanks "61692231[,61691167-"; structure "1^,2^"; splice_chain "61692071^,61691861^"; sources "Undefined,Undefined"; NMorMRNA "null"; degree "4"; dimension "2_2";
ST4.03ch01	as_event	63201268	63202146	-	transcript_id "StLNC2416,StLNC0627"; gene_id "ST4.03ch01:63199720-63202755C"; flanks "63202146^,63201268^"; structure "1-,2-"; splice_chain "63201466-,63201374-"; sources "Undefined,Undefined"; NMorMRNA "null"; degree "4"; dimension "2_2";
ST4.03ch01	as_event	63201127	63202146	-	transcript_id "StLNC2416,StLNC2718"; gene_id "ST4.03ch01:63199720-63202755C"; flanks "63202146^,63201127^"; structure "1-3^4-,2-"; splice_chain "63201466-63201268^63201179-,63201363-"; sources "Undefined,Undefined"; NMorMRNA "null"; degree "4"; dimension "2_2";
ST4.03ch01	as_event	63792005	63793830	-	transcript_id "StLNC1650,StLNC2029"; gene_id "ST4.03ch01:63790017-63794359C"; flanks "63793830^,63792005-"; structure "0,1-2^"; splice_chain ",63792394-63792310^"; sources "Undefined,Undefined"; NMorMRNA "null"; degree "4"; dimension "2_2";
ST4.03ch01	as_event	74307665	74307948	-	transcript_id "StLNC0389,StLNC2572"; gene_id "ST4.03ch01:74302327-74307963C"; flanks "74307948[,74307665-"; structure "1^,2^"; splice_chain "74307792^,74307747^"; sources "Undefined,Undefined"; NMorMRNA "null"; degree "4"; dimension "2_2";
ST4.03ch01	as_event	74302572	74307792	-	transcript_id "StLNC0389,StLNC2693"; gene_id "ST4.03ch01:74302327-74307963C"; flanks "74307792^,74302572-"; structure "1-2^,3-4^"; splice_chain "74307665-74307604^,74302850-74302790^"; sources "Undefined,Undefined"; NMorMRNA "null"; degree "4"; dimension "2_2";
ST4.03ch01	as_event	74801431	74802231	-	transcript_id "StLNC0198,StLNC0298"; gene_id "ST4.03ch01:74801431-74802637C"; flanks "74802231^,74801431]"; structure "1-,2-"; splice_chain "74801863-,74801860-"; sources "Undefined,Undefined"; NMorMRNA "null"; degree "4"; dimension "2_2";
ST4.03ch01	as_event	76186276	76186645	-	transcript_id "StLNC1794/StLNC0378,StLNC2639/StLNC0233/StLNC0144"; gene_id "ST4.03ch01:76181179-76188535C"; flanks "76186645^,76186276^"; structure "1-,2-"; splice_chain "76186456-,76186435-"; sources "Undefined,Undefined"; NMorMRNA "null"; degree "4"; dimension "2_2";
ST4.03ch01	as_event	76186276	76186696	-	transcript_id "StLNC2549,StLNC0378,StLNC0233/StLNC0144"; gene_id "ST4.03ch01:76181179-76188535C"; flanks "76186696-,76186276^"; structure "0,1^2-,1^3-"; splice_chain ",76186645^76186456-,76186645^76186435-"; sources "Undefined,Undefined,Undefined"; NMorMRNA "null"; degree "9"; dimension "3_3";
ST4.03ch01	as_event	76185352	76186181	-	transcript_id "StLNC1794/StLNC2639,StLNC2549/StLNC0233"; gene_id "ST4.03ch01:76181179-76188535C"; flanks "76186181-,76185352^"; structure "0,1^2-"; splice_chain ",76185931^76185823-"; sources "Undefined,Undefined"; NMorMRNA "null"; degree "4"; dimension "2_2";
ST4.03ch01	as_event	76182614	76183420	-	transcript_id "StLNC2639/StLNC0233,StLNC2549/StLNC1794"; gene_id "ST4.03ch01:76181179-76188535C"; flanks "76183420-,76182614^"; structure "0,1^2-"; splice_chain ",76183373^76182768-"; sources "Undefined,Undefined"; NMorMRNA "null"; degree "4"; dimension "2_2";
ST4.03ch01	as_event	76181225	76181862	-	transcript_id "StLNC1794,StLNC2549"; gene_id "ST4.03ch01:76181179-76188535C"; flanks "76181862^,76181225-"; structure "0,1-2^"; splice_chain ",76181539-76181491^"; sources "Undefined,Undefined"; NMorMRNA "null"; degree "4"; dimension "2_2";
ST4.03ch01	as_event	77487467	77495347	-	transcript_id "StLNC1432,StLNC1207"; gene_id "ST4.03ch01:77487467-77495707C"; flanks "77495347[,77487467]"; structure "1^3-,2^4-"; splice_chain "77495124^77487613-,77495099^77487588-"; sources "Undefined,Undefined"; NMorMRNA "null"; degree "4"; dimension "2_2";
ST4.03ch01	as_event	78962863	78963236	-	transcript_id "StLNC1723,StLNC1214"; gene_id "ST4.03ch01:78954978-78963237C"; flanks "78963236[,78962863^"; structure "0,1^2-"; splice_chain ",78963019^78962924-"; sources "Undefined,Undefined"; NMorMRNA "null"; degree "4"; dimension "2_2";
ST4.03ch01	as_event	78962512	78962863	-	transcript_id "StLNC2649/StLNC1892/StLNC0590,StLNC1214/StLNC1723"; gene_id "ST4.03ch01:78954978-78963237C"; flanks "78962863^,78962512^"; structure "1-,2-"; splice_chain "78962589-,78962583-"; sources "Undefined,Undefined"; NMorMRNA "null"; degree "4"; dimension "2_2";
ST4.03ch01	as_event	78962239	78962863	-	transcript_id "StLNC1873,StLNC2649/StLNC1892/StLNC0590,StLNC1214"; gene_id "ST4.03ch01:78954978-78963237C"; flanks "78962863^,78962239-"; structure "0,1-3^,2-3^"; splice_chain ",78962589-78962512^,78962583-78962512^"; sources "Undefined,Undefined,Undefined"; NMorMRNA "null"; degree "9"; dimension "3_3";
ST4.03ch01	as_event	78962167	78962512	-	transcript_id "StLNC1723,StLNC1892/StLNC1214/StLNC0590"; gene_id "ST4.03ch01:78954978-78963237C"; flanks "78962512^,78962167^"; structure "1-,2-"; splice_chain "78962389-,78962239-"; sources "Undefined,Undefined"; NMorMRNA "null"; degree "4"; dimension "2_2";
ST4.03ch01	as_event	78962167	78962863	-	transcript_id "StLNC1892/StLNC0590,StLNC1723,StLNC1214,StLNC1873"; gene_id "ST4.03ch01:78954978-78963237C"; flanks "78962863^,78962167^"; structure "1-3^5-,2-3^4-,2-3^5-,5-"; splice_chain "78962589-78962512^78962239-,78962583-78962512^78962389-,78962583-78962512^78962239-,78962239-"; sources "Undefined,Undefined,Undefined,Undefined"; NMorMRNA "null"; degree "16"; dimension "4_4";
ST4.03ch01	as_event	78961365	78962239	-	transcript_id "StLNC2649,StLNC1873/StLNC1892/StLNC1214/StLNC0590"; gene_id "ST4.03ch01:78954978-78963237C"; flanks "78962239-,78961365^"; structure "0,1^2-"; splice_chain ",78962167^78961714-"; sources "Undefined,Undefined"; NMorMRNA "null"; degree "4"; dimension "2_2";
ST4.03ch01	as_event	78961365	78962512	-	transcript_id "StLNC1723,StLNC2649,StLNC1892/StLNC1214/StLNC0590"; gene_id "ST4.03ch01:78954978-78963237C"; flanks "78962512^,78961365^"; structure "1-3^4-,2-,2-3^4-"; splice_chain "78962389-78962167^78961714-,78962239-,78962239-78962167^78961714-"; sources "Undefined,Undefined,Undefined"; NMorMRNA "null"; degree "9"; dimension "3_3";
ST4.03ch01	as_event	78961365	78962863	-	transcript_id "StLNC2649,StLNC1892/StLNC0590,StLNC1723,StLNC1214,StLNC1873"; gene_id "ST4.03ch01:78954978-78963237C"; flanks "78962863^,78961365^"; structure "1-3^5-,1-3^5-6^7-,2-3^4-6^7-,2-3^5-6^7-,5-6^7-"; splice_chain "78962589-78962512^78962239-,78962589-78962512^78962239-78962167^78961714-,78962583-78962512^78962389-78962167^78961714-,78962583-78962512^78962239-78962167^78961714-,78962239-78…
ST4.03ch01	as_event	78957131	78959172	-	transcript_id "StLNC2649/StLNC1892/StLNC1214/StLNC1259,StLNC0457"; gene_id "ST4.03ch01:78954978-78963237C"; flanks "78959172-,78957131-"; structure "1^,2^"; splice_chain "78959119^,78958888^"; sources "Undefined,Undefined"; NMorMRNA "null"; degree "4"; dimension "2_2";
ST4.03ch01	as_event	78957044	78959172	-	transcript_id "StLNC1873,StLNC2649/StLNC1892/StLNC1214/StLNC1259,StLNC0457"; gene_id "ST4.03ch01:78954978-78963237C"; flanks "78959172-,78957044^"; structure "0,1^3-,2^3-"; splice_chain ",78959119^78957131-,78958888^78957131-"; sources "Undefined,Undefined,Undefined"; NMorMRNA "null"; degree "9"; dimension "3_3";
ST4.03ch01	as_event	78955677	78959119	-	transcript_id "StLNC2503/StLNC1723/StLNC0590/StLNC1871,StLNC2649/StLNC1892/StLNC1214/StLNC1259"; gene_id "ST4.03ch01:78954978-78963237C"; flanks "78959119^,78955677-"; structure "0,1-2^"; splice_chain ",78957131-78957044^"; sources "Undefined,Undefined"; NMorMRNA "null"; degree "4"; dimension "2_2";
ST4.03ch01	as_event	78955677	78959172	-	transcript_id "StLNC2503/StLNC1723/StLNC0590/StLNC1871,StLNC2649/StLNC1892/StLNC1214/StLNC1259,StLNC0457,StLNC1873"; gene_id "ST4.03ch01:78954978-78963237C"; flanks "78959172-,78955677-"; structure "1^,1^3-4^,2^3-4^,4^"; splice_chain "78959119^,78959119^78957131-78957044^,78958888^78957131-78957044^,78957044^"; sources "Undefined,Undefined,Undefined,Undefined"; NMorMRNA "null"; degree "16"; dimen…
ST4.03ch01	as_event	81914944	81915992	-	transcript_id "StLNC0570,StLNC0568"; gene_id "ST4.03ch01:81914642-81916137C"; flanks "81915992^,81914944-"; structure "0,1-2^"; splice_chain ",81915765-81915532^"; sources "Undefined,Undefined"; NMorMRNA "null"; degree "4"; dimension "2_2";
ST4.03ch01	as_event	82133514	82134363	-	transcript_id "StLNC0465,StLNC0535"; gene_id "ST4.03ch01:82132872-82136493C"; flanks "82134363^,82133514-"; structure "0,1-2^"; splice_chain ",82134019-82133870^"; sources "Undefined,Undefined"; NMorMRNA "null"; degree "4"; dimension "2_2";
ST4.03ch01	as_event	82132920	82133870	-	transcript_id "StLNC1976,StLNC0535"; gene_id "ST4.03ch01:82132872-82136493C"; flanks "82133870^,82132920-"; structure "0,1-2^"; splice_chain ",82133514-82133364^"; sources "Undefined,Undefined"; NMorMRNA "null"; degree "4"; dimension "2_2";
ST4.03ch01	as_event	82132920	82134363	-	transcript_id "StLNC0829,StLNC1976,StLNC0535"; gene_id "ST4.03ch01:82132872-82136493C"; flanks "82134363^,82132920-"; structure "0,1-2^,1-2^3-4^"; splice_chain ",82134019-82133870^,82134019-82133870^82133514-82133364^"; sources "Undefined,Undefined,Undefined"; NMorMRNA "null"; degree "9"; dimension "3_3";
ST4.03ch01	as_event	82146859	82152648	-	transcript_id "StLNC2542,StLNC0840"; gene_id "ST4.03ch01:82146251-82152796C"; flanks "82152648^,82146859-"; structure "0,1-2^3-4^5-6^"; splice_chain ",82148446-82148287^82147943-82147792^82147443-82147293^"; sources "Undefined,Undefined"; NMorMRNA "null"; degree "4"; dimension "2_2";
ST4.03ch01	as_event	82829774	82831146	-	transcript_id "StLNC1626,StLNC0541"; gene_id "ST4.03ch01:82827008-82835304C"; flanks "82831146^,82829774-"; structure "0,1-2^"; splice_chain ",82830042-82829973^"; sources "Undefined,Undefined"; NMorMRNA "null"; degree "4"; dimension "2_2";
ST4.03ch01	as_event	87823579	87824437	-	transcript_id "StLNC2344,StLNC2004"; gene_id "ST4.03ch01:87821495-87824939C"; flanks "87824437^,87823579-"; structure "0,1-2^"; splice_chain ",87823965-87823897^"; sources "Undefined,Undefined"; NMorMRNA "null"; degree "4"; dimension "2_2";
ST4.03ch01	as_event	88022670	88024134	-	transcript_id "StLNC0159,StLNC0855"; gene_id "ST4.03ch01:88021330-88025763C"; flanks "88024134-,88022670-"; structure "1^,2^"; splice_chain "88023978^,88023933^"; sources "Undefined,Undefined"; NMorMRNA "null"; degree "4"; dimension "2_2";
ST4.03ch02	as_event	18253182	18255615	+	transcript_id "StLNC2635,StLNC2593"; gene_id "ST4.03ch02:18251159-18256408W"; flanks "18253182^,18255615-"; structure "0,1-2^"; splice_chain ",18254755-18255103^"; sources "Undefined,Undefined"; NMorMRNA "null"; degree "4"; dimension "2_2";
ST4.03ch02	as_event	18253182	18256407	+	transcript_id "StLNC2593,StLNC0852,StLNC2635"; gene_id "ST4.03ch02:18251159-18256408W"; flanks "18253182^,18256407]"; structure "1-3^4-,2-,4-"; splice_chain "18254755-18255103^18255615-,18255034-,18255615-"; sources "Undefined,Undefined,Undefined"; NMorMRNA "null"; degree "9"; dimension "3_3";
ST4.03ch02	as_event	32076016	32077265	+	transcript_id "StLNC2310,StLNC2205"; gene_id "ST4.03ch02:32075881-32077505W"; flanks "32076016^,32077265-"; structure "1-2^,3-4^"; splice_chain "32076443-32076514^,32076743-32076877^"; sources "Undefined,Undefined"; NMorMRNA "null"; degree "4"; dimension "2_2";
ST4.03ch02	as_event	37295416	37296118	+	transcript_id "StLNC2087,StLNC1046"; gene_id "ST4.03ch02:37294676-37296547W"; flanks "37295416^,37296118^"; structure "1-,2-"; splice_chain "37295768-,37295983-"; sources "Undefined,Undefined"; NMorMRNA "null"; degree "4"; dimension "2_2";
ST4.03ch02	as_event	37295416	37296263	+	transcript_id "StLNC1313,StLNC2087,StLNC1046"; gene_id "ST4.03ch02:37294676-37296547W"; flanks "37295416^,37296263-"; structure "0,1-3^,2-3^"; splice_chain ",37295768-37296118^,37295983-37296118^"; sources "Undefined,Undefined,Undefined"; NMorMRNA "null"; degree "9"; dimension "3_3";
ST4.03ch02	as_event	39677429	39678189	+	transcript_id "StLNC1596,StLNC1431"; gene_id "ST4.03ch02:39675540-39679171W"; flanks "39677429-,39678189^"; structure "0,1^2-"; splice_chain ",39678032^39678112-"; sources "Undefined,Undefined"; NMorMRNA "null"; degree "4"; dimension "2_2";
ST4.03ch02	as_event	41269211	41279359	+	transcript_id "StLNC0616,StLNC1985"; gene_id "ST4.03ch02:41265285-41279505W"; flanks "41269211^,41279359-"; structure "0,1-2^"; splice_chain ",41278086-41278281^"; sources "Undefined,Undefined"; NMorMRNA "null"; degree "4"; dimension "2_2";
ST4.03ch02	as_event	2118371	2126988	-	transcript_id "StLNC1447,StLNC0453"; gene_id "ST4.03ch02:2117211-2126993C"; flanks "2126988[,2118371-"; structure "1^,2^"; splice_chain "2126540^,2126426^"; sources "Undefined,Undefined"; NMorMRNA "null"; degree "4"; dimension "2_2";
ST4.03ch02	as_event	2117407	2126988	-	transcript_id "StLNC1497,StLNC0453"; gene_id "ST4.03ch02:2117211-2126993C"; flanks "2126988[,2117407]"; structure "1^3-,2^4-"; splice_chain "2126629^2118582-,2126426^2118371-"; sources "Undefined,Undefined"; NMorMRNA "null"; degree "4"; dimension "2_2";
ST4.03ch02	as_event	2117213	2126992	-	transcript_id "StLNC1572,StLNC0744"; gene_id "ST4.03ch02:2117211-2126993C"; flanks "2126992[,2117213]"; structure "1^3-,2^4-"; splice_chain "2126629^2118575-,2126101^2117937-"; sources "Undefined,Undefined"; NMorMRNA "null"; degree "4"; dimension "2_2";
ST4.03ch02	as_event	20709413	20709675	-	transcript_id "StLNC1222,StLNC1151"; gene_id "ST4.03ch02:20709413-20709749C"; flanks "20709675^,20709413]"; structure "1-,2-"; splice_chain "20709614-,20709554-"; sources "Undefined,Undefined"; NMorMRNA "null"; degree "4"; dimension "2_2";
ST4.03ch02	as_event	41180808	41183874	-	transcript_id "StLNC2099,StLNC1953"; gene_id "ST4.03ch02:41180602-41184238C"; flanks "41183874^,41180808-"; structure "0,1-2^"; splice_chain ",41181435-41181346^"; sources "Undefined,Undefined"; NMorMRNA "null"; degree "4"; dimension "2_2";
ST4.03ch03	as_event	14719026	14720574	+	transcript_id "StLNC1506,StLNC0737/StLNC0307/StLNC1883"; gene_id "ST4.03ch03:14716029-14725245W"; flanks "14719026^,14720574^"; structure "1-,2-"; splice_chain "14720489-,14720496-"; sources "Undefined,Undefined"; NMorMRNA "null"; degree "4"; dimension "2_2";
ST4.03ch03	as_event	14721011	14722348	+	transcript_id "StLNC2194,StLNC1506,StLNC0307"; gene_id "ST4.03ch03:14716029-14725245W"; flanks "14721011-,14722348-"; structure "1^,2^,3^"; splice_chain "14721089^,14721145^,14721433^"; sources "Undefined,Undefined,Undefined"; NMorMRNA "null"; degree "9"; dimension "3_3";
ST4.03ch03	as_event	14721089	14723139	+	transcript_id "StLNC2194,StLNC1883"; gene_id "ST4.03ch03:14716029-14725245W"; flanks "14721089^,14723139^"; structure "1-,2-"; splice_chain "14722348-,14722418-"; sources "Undefined,Undefined"; NMorMRNA "null"; degree "4"; dimension "2_2";
ST4.03ch03	as_event	14721011	14723139	+	transcript_id "StLNC0737,StLNC2194,StLNC1883,StLNC1506,StLNC0307"; gene_id "ST4.03ch03:14716029-14725245W"; flanks "14721011-,14723139^"; structure "0,1^4-,1^5-,2^4-,3^4-"; splice_chain ",14721089^14722348-,14721089^14722418-,14721145^14722348-,14721433^14722348-"; sources "Undefined,Undefined,Undefined,Undefined,Undefined"; NMorMRNA "null"; degree "25"; dimension "5_5";
ST4.03ch03	as_event	14721089	14724856	+	transcript_id "StLNC2737,StLNC2194,StLNC1883"; gene_id "ST4.03ch03:14716029-14725245W"; flanks "14721089^,14724856-"; structure "0,1-3^,2-3^"; splice_chain ",14722348-14723139^,14722418-14723139^"; sources "Undefined,Undefined,Undefined"; NMorMRNA "null"; degree "9"; dimension "3_3";
ST4.03ch03	as_event	22419130	22420235	+	transcript_id "StLNC2333,StLNC1192"; gene_id "ST4.03ch03:22416955-22422205W"; flanks "22419130-,22420235-"; structure "1^,2^"; splice_chain "22419274^,22419413^"; sources "Undefined,Undefined"; NMorMRNA "null"; degree "4"; dimension "2_2";
ST4.03ch03	as_event	22419130	22420298	+	transcript_id "StLNC0912/StLNC1140,StLNC2333,StLNC1192"; gene_id "ST4.03ch03:22416955-22422205W"; flanks "22419130-,22420298^"; structure "0,1^3-,2^3-"; splice_chain ",22419274^22420235-,22419413^22420235-"; sources "Undefined,Undefined,Undefined"; NMorMRNA "null"; degree "9"; dimension "3_3";
ST4.03ch03	as_event	45664554	45665189	+	transcript_id "StLNC2195,StLNC2230"; gene_id "ST4.03ch03:45664507-45666830W"; flanks "45664554^,45665189^"; structure "1-,2-"; splice_chain "45665020-,45665035-"; sources "Undefined,Undefined"; NMorMRNA "null"; degree "4"; dimension "2_2";
ST4.03ch03	as_event	47227772	47228297	+	transcript_id "StLNC2255,StLNC0468"; gene_id "ST4.03ch03:47227451-47230324W"; flanks "47227772^,47228297^"; structure "1-,2-"; splice_chain "47228190-,47228247-"; sources "Undefined,Undefined"; NMorMRNA "null"; degree "4"; dimension "2_2";
ST4.03ch03	as_event	55507286	55507573	+	transcript_id "StLNC1103,StLNC2355"; gene_id "ST4.03ch03:55507239-55507864W"; flanks "55507286^,55507573-"; structure "0,1-2^"; splice_chain ",55507395-55507472^"; sources "Undefined,Undefined"; NMorMRNA "null"; degree "4"; dimension "2_2";
ST4.03ch03	as_event	59204783	59207550	+	transcript_id "StLNC0082,StLNC2007/StLNC0876"; gene_id "ST4.03ch03:59204463-59218094W"; flanks "59204783^,59207550-"; structure "0,1-2^"; splice_chain ",59205920-59206272^"; sources "Undefined,Undefined"; NMorMRNA "null"; degree "4"; dimension "2_2";
ST4.03ch03	as_event	59205920	59208122	+	transcript_id "StLNC2619,StLNC2007/StLNC0876"; gene_id "ST4.03ch03:59204463-59218094W"; flanks "59205920-,59208122^"; structure "1^4-,2^3-"; splice_chain "59205987^59207618-,59206272^59207550-"; sources "Undefined,Undefined"; NMorMRNA "null"; degree "4"; dimension "2_2";
ST4.03ch03	as_event	59204783	59208122	+	transcript_id "StLNC2619,StLNC2007/StLNC0876,StLNC0082"; gene_id "ST4.03ch03:59204463-59218094W"; flanks "59204783^,59208122^"; structure "1-2^5-,1-3^4-,4-"; splice_chain "59205920-59205987^59207618-,59205920-59206272^59207550-,59207550-"; sources "Undefined,Undefined,Undefined"; NMorMRNA "null"; degree "9"; dimension "3_3";
ST4.03ch03	as_event	59208377	59217446	+	transcript_id "StLNC2007/StLNC0082/StLNC2619/StLNC0831,StLNC0876"; gene_id "ST4.03ch03:59204463-59218094W"; flanks "59208377^,59217446-"; structure "0,1-2^"; splice_chain ",59217246-59217288^"; sources "Undefined,Undefined"; NMorMRNA "null"; degree "4"; dimension "2_2";
ST4.03ch03	as_event	751889	754376	-	transcript_id "StLNC1882,StLNC0800"; gene_id "ST4.03ch03:749280-754376C"; flanks "754376[,751889^"; structure "1^3-,2^4-"; splice_chain "754325^752021-,754206^751900-"; sources "Undefined,Undefined"; NMorMRNA "null"; degree "4"; dimension "2_2";
ST4.03ch03	as_event	22390313	22391715	-	transcript_id "StLNC2422/StLNC1261/StLNC1909,StLNC2308/StLNC2077/StLNC2423,StLNC0303"; gene_id "ST4.03ch03:22374387-22391872C"; flanks "22391715^,22390313^"; structure "1-,2-,3-"; splice_chain "22390413-,22390392-,22390383-"; sources "Undefined,Undefined,Undefined"; NMorMRNA "null"; degree "9"; dimension "3_3";
ST4.03ch03	as_event	22386643	22389229	-	transcript_id "StLNC2423,StLNC2422/StLNC2077"; gene_id "ST4.03ch03:22374387-22391872C"; flanks "22389229-,22386643-"; structure "1^,2^"; splice_chain "22389114^,22388612^"; sources "Undefined,Undefined"; NMorMRNA "null"; degree "4"; dimension "2_2";
ST4.03ch03	as_event	22658784	22660419	-	transcript_id "StLNC0021,StLNC2217"; gene_id "ST4.03ch03:22658162-22661347C"; flanks "22660419^,22658784-"; structure "0,1-2^"; splice_chain ",22659929-22659791^"; sources "Undefined,Undefined"; NMorMRNA "null"; degree "4"; dimension "2_2";
ST4.03ch03	as_event	44231215	44232240	-	transcript_id "StLNC2476/StLNC1059,StLNC0254"; gene_id "ST4.03ch03:44228603-44232240C"; flanks "44232240[,44231215-"; structure "1^,2^"; splice_chain "44231773^,44231767^"; sources "Undefined,Undefined"; NMorMRNA "null"; degree "4"; dimension "2_2";
ST4.03ch03	as_event	58888505	58889036	-	transcript_id "StLNC2392,StLNC0544"; gene_id "ST4.03ch03:58885583-58889036C"; flanks "58889036[,58888505^"; structure "0,1^2-"; splice_chain ",58888646^58888566-"; sources "Undefined,Undefined"; NMorMRNA "null"; degree "4"; dimension "2_2";
ST4.03ch04	as_event	1767819	1772542	+	transcript_id "StLNC2316,StLNC0528"; gene_id "ST4.03ch04:1767548-1773532W"; flanks "1767819^,1772542^"; structure "1-,2-"; splice_chain "1770456-,1772441-"; sources "Undefined,Undefined"; NMorMRNA "null"; degree "4"; dimension "2_2";
ST4.03ch04	as_event	13032703	13037169	+	transcript_id "StLNC1494,StLNC1153"; gene_id "ST4.03ch04:13032458-13038395W"; flanks "13032703^,13037169^"; structure "1-,2-"; splice_chain "13036935-,13037038-"; sources "Undefined,Undefined"; NMorMRNA "null"; degree "4"; dimension "2_2";
ST4.03ch04	as_event	13032703	13038099	+	transcript_id "StLNC2363,StLNC1494,StLNC1153"; gene_id "ST4.03ch04:13032458-13038395W"; flanks "13032703^,13038099-"; structure "0,1-3^,2-3^"; splice_chain ",13036935-13037169^,13037038-13037169^"; sources "Undefined,Undefined,Undefined"; NMorMRNA "null"; degree "9"; dimension "3_3";
ST4.03ch04	as_event	21511510	21511814	+	transcript_id "StLNC0249,StLNC0085"; gene_id "ST4.03ch04:21511334-21514488W"; flanks "21511510^,21511814^"; structure "1-,2-"; splice_chain "21511698-,21511717-"; sources "Undefined,Undefined"; NMorMRNA "null"; degree "4"; dimension "2_2";
ST4.03ch04	as_event	21511334	21511814	+	transcript_id "StLNC0939,StLNC0249"; gene_id "ST4.03ch04:21511334-21514488W"; flanks "21511334[,21511814^"; structure "0,1^2-"; splice_chain ",21511510^21511698-"; sources "Undefined,Undefined"; NMorMRNA "null"; degree "4"; dimension "2_2";
ST4.03ch04	as_event	57584784	57587401	+	transcript_id "StLNC1075/StLNC2224,StLNC0018"; gene_id "ST4.03ch04:57581679-57589140W"; flanks "57584784-,57587401^"; structure "0,1^2-"; splice_chain ",57584970^57585547-"; sources "Undefined,Undefined"; NMorMRNA "null"; degree "4"; dimension "2_2";
ST4.03ch04	as_event	71413044	71413560	+	transcript_id "StLNC0005,StLNC0869"; gene_id "ST4.03ch04:71410500-71419149W"; flanks "71413044^,71413560-"; structure "0,1-2^"; splice_chain ",71413260-71413420^"; sources "Undefined,Undefined"; NMorMRNA "null"; degree "4"; dimension "2_2";
ST4.03ch04	as_event	71410685	71413637	+	transcript_id "StLNC2475,StLNC0869,StLNC0005"; gene_id "ST4.03ch04:71410500-71419149W"; flanks "71410685-,71413637^"; structure "0,1^2-3^4-5^6-,1^2-3^6-"; splice_chain ",71411811^71412350-71413044^71413260-71413420^71413560-,71411811^71412350-71413044^71413560-"; sources "Undefined,Undefined,Undefined"; NMorMRNA "null"; degree "9"; dimension "3_3";
ST4.03ch04	as_event	71413637	71415325	+	transcript_id "StLNC0869/StLNC0005,StLNC2475"; gene_id "ST4.03ch04:71410500-71419149W"; flanks "71413637^,71415325^"; structure "1-,2-"; splice_chain "71415181-,71415262-"; sources "Undefined,Undefined"; NMorMRNA "null"; degree "4"; dimension "2_2";
ST4.03ch04	as_event	71416907	71418247	+	transcript_id "StLNC0005,StLNC0869,StLNC2474/StLNC2475"; gene_id "ST4.03ch04:71410500-71419149W"; flanks "71416907-,71418247^"; structure "0,1^2-,3^4-"; splice_chain ",71417027^71417123-,71417772^71418154-"; sources "Undefined,Undefined,Undefined"; NMorMRNA "null"; degree "9"; dimension "3_3";
ST4.03ch04	as_event	71912276	71913411	+	transcript_id "StLNC1346/StLNC2719,StLNC0961,StLNC0235"; gene_id "ST4.03ch04:71902187-71918222W"; flanks "71912276-,71913411-"; structure "1^,2^,3^"; splice_chain "71912515^,71913299^,71913304^"; sources "Undefined,Undefined,Undefined"; NMorMRNA "null"; degree "9"; dimension "3_3";
ST4.03ch04	as_event	71912276	71913454	+	transcript_id "StLNC0546/StLNC0006/StLNC0714,StLNC1346/StLNC2719,StLNC0961,StLNC0235"; gene_id "ST4.03ch04:71902187-71918222W"; flanks "71912276-,71913454^"; structure "0,1^4-,2^4-,3^4-"; splice_chain ",71912515^71913411-,71913299^71913411-,71913304^71913411-"; sources "Undefined,Undefined,Undefined,Undefined"; NMorMRNA "null"; degree "16"; dimension "4_4";
ST4.03ch04	as_event	71915808	71917830	+	transcript_id "StLNC0006,StLNC0546/StLNC1346/StLNC0235"; gene_id "ST4.03ch04:71902187-71918222W"; flanks "71915808^,71917830^"; structure "1-,2-"; splice_chain "71917012-,71917758-"; sources "Undefined,Undefined"; NMorMRNA "null"; degree "4"; dimension "2_2";
ST4.03ch04	as_event	355002	355371	-	transcript_id "StLNC0636,StLNC1396"; gene_id "ST4.03ch04:355002-355986C"; flanks "355371^,355002]"; structure "1-,2-"; splice_chain "355118-,355055-"; sources "Undefined,Undefined"; NMorMRNA "null"; degree "4"; dimension "2_2";
ST4.03ch04	as_event	9456294	9457605	-	transcript_id "StLNC1830,StLNC0845"; gene_id "ST4.03ch04:9456098-9461215C"; flanks "9457605-,9456294-"; structure "1^,2^"; splice_chain "9457430^,9456916^"; sources "Undefined,Undefined"; NMorMRNA "null"; degree "4"; dimension "2_2";
ST4.03ch04	as_event	9674773	9682623	-	transcript_id "StLNC1082,StLNC2633"; gene_id "ST4.03ch04:9672462-9682623C"; flanks "9682623[,9674773-"; structure "1^3-4^,2^"; splice_chain "9682417^9677726-9677600^,9682290^"; sources "Undefined,Undefined"; NMorMRNA "null"; degree "4"; dimension "2_2";
ST4.03ch04	as_event	9672462	9674773	-	transcript_id "StLNC2633/StLNC0554,StLNC0954"; gene_id "ST4.03ch04:9672462-9682623C"; flanks "9674773-,9672462]"; structure "0,1^2-"; splice_chain ",9674650^9673814-"; sources "Undefined,Undefined"; NMorMRNA "null"; degree "4"; dimension "2_2";
ST4.03ch04	as_event	32141590	32146484	-	transcript_id "StLNC2708,StLNC0484"; gene_id "ST4.03ch04:32140887-32147260C"; flanks "32146484-,32141590-"; structure "1^,2^"; splice_chain "32146427^,32146409^"; sources "Undefined,Undefined"; NMorMRNA "null"; degree "4"; dimension "2_2";
ST4.03ch04	as_event	40736820	40738168	-	transcript_id "StLNC0265,StLNC0091/StLNC1435"; gene_id "ST4.03ch04:40735665-40759089C"; flanks "40738168^,40736820-"; structure "0,1-2^"; splice_chain ",40737863-40737728^"; sources "Undefined,Undefined"; NMorMRNA "null"; degree "4"; dimension "2_2";
ST4.03ch04	as_event	40736078	40736667	-	transcript_id "StLNC1435,StLNC0265/StLNC0091"; gene_id "ST4.03ch04:40735665-40759089C"; flanks "40736667^,40736078-"; structure "0,1-2^"; splice_chain ",40736221-40736167^"; sources "Undefined,Undefined"; NMorMRNA "null"; degree "4"; dimension "2_2";
ST4.03ch04	as_event	46861296	46861577	-	transcript_id "StLNC0207,StLNC2037/StLNC1755"; gene_id "ST4.03ch04:46860794-46866620C"; flanks "46861577-,46861296-"; structure "1^,2^"; splice_chain "46861423^,46861416^"; sources "Undefined,Undefined"; NMorMRNA "null"; degree "4"; dimension "2_2";
ST4.03ch04	as_event	59098400	59098515	-	transcript_id "StLNC2454,StLNC1463"; gene_id "ST4.03ch04:59015476-59098778C"; flanks "59098515[,59098400-"; structure "1^,2^"; splice_chain "59098467^,59098431^"; sources "Undefined,Undefined"; NMorMRNA "null"; degree "4"; dimension "2_2";
ST4.03ch04	as_event	59098338	59098467	-	transcript_id "StLNC2454,StLNC0497/StLNC0360/StLNC2449/StLNC2769/StLNC2167/StLNC2418/StLNC1631/StLNC2234/StLNC2468/StLNC1804/StLNC2275"; gene_id "ST4.03ch04:59015476-59098778C"; flanks "59098467^,59098338^"; structure "1-,2-"; splice_chain "59098400-,59098370-"; sources "Undefined,Undefined"; NMorMRNA "null"; degree "4"; dimension "2_2";
ST4.03ch04	as_event	59098338	59098515	-	transcript_id "StLNC2454,StLNC0360/StLNC2449/StLNC2418/StLNC1631/StLNC2234/StLNC2468/StLNC2275,StLNC1463"; gene_id "ST4.03ch04:59015476-59098778C"; flanks "59098515[,59098338^"; structure "1^3-,1^4-,2^3-"; splice_chain "59098467^59098400-,59098467^59098370-,59098431^59098400-"; sources "Undefined,Undefined,Undefined"; NMorMRNA "null"; degree "9"; dimension "3_3";
ST4.03ch04	as_event	59098338	59098536	-	transcript_id "StLNC2410,StLNC2769/StLNC1804"; gene_id "ST4.03ch04:59015476-59098778C"; flanks "59098536[,59098338^"; structure "1^3-,2^4-"; splice_chain "59098488^59098391-,59098467^59098370-"; sources "Undefined,Undefined"; NMorMRNA "null"; degree "4"; dimension "2_2";
ST4.03ch04	as_event	59098277	59098391	-	transcript_id "StLNC2410,StLNC0624"; gene_id "ST4.03ch04:59015476-59098778C"; flanks "59098391-,59098277-"; structure "1^,2^"; splice_chain "59098338^,59098311^"; sources "Undefined,Undefined"; NMorMRNA "null"; degree "4"; dimension "2_2";
ST4.03ch04	as_event	59098217	59098515	-	transcript_id "StLNC2234,StLNC2817/StLNC2808"; gene_id "ST4.03ch04:59015476-59098778C"; flanks "59098515[,59098217-"; structure "1^3-4^,2^5-6^"; splice_chain "59098467^59098370-59098338^,59098434^59098337-59098278^"; sources "Undefined,Undefined"; NMorMRNA "null"; degree "4"; dimension "2_2";
ST4.03ch04	as_event	59097932	59098338	-	transcript_id "StLNC2167/StLNC2418,StLNC2234"; gene_id "ST4.03ch04:59015476-59098778C"; flanks "59098338^,59097932-"; structure "1-2^,3-4^"; splice_chain "59098277-59098251^,59098217-59098131^"; sources "Undefined,Undefined"; NMorMRNA "null"; degree "4"; dimension "2_2";
ST4.03ch04	as_event	59097800	59098515	-	transcript_id "StLNC1631/StLNC2275,StLNC2817/StLNC2808,StLNC1463"; gene_id "ST4.03ch04:59015476-59098778C"; flanks "59098515[,59097800-"; structure "1^5-6^9-10^,2^7-8^11-12^,3^4-6^9-10^"; splice_chain "59098467^59098370-59098338^59098277-59098251^,59098434^59098337-59098278^59098217-59098161^,59098431^59098400-59098338^59098277-59098251^"; sources "Undefined,Undefined,Undefined"; NMorMRNA "null";…
ST4.03ch04	as_event	59097602	59098251	-	transcript_id "StLNC2449/StLNC2454,StLNC2275"; gene_id "ST4.03ch04:59015476-59098778C"; flanks "59098251^,59097602-"; structure "0,1-2^3-4^"; splice_chain ",59097800-59097768^59097701-59097669^"; sources "Undefined,Undefined"; NMorMRNA "null"; degree "4"; dimension "2_2";
ST4.03ch04	as_event	59097536	59097800	-	transcript_id "StLNC1631/StLNC1463,StLNC0497"; gene_id "ST4.03ch04:59015476-59098778C"; flanks "59097800-,59097536-"; structure "1^3-4^,2^"; splice_chain "59097768^59097635-59097603^,59097735^"; sources "Undefined,Undefined"; NMorMRNA "null"; degree "4"; dimension "2_2";
ST4.03ch04	as_event	59097536	59098251	-	transcript_id "StLNC2769/StLNC2468/StLNC1804,StLNC2167,StLNC1631/StLNC1463,StLNC0497"; gene_id "ST4.03ch04:59015476-59098778C"; flanks "59098251^,59097536-"; structure "0,1-2^,3-4^6-7^,3-5^"; splice_chain ",59097932-59097867^,59097800-59097768^59097635-59097603^,59097800-59097735^"; sources "Undefined,Undefined,Undefined,Undefined"; NMorMRNA "null"; degree "16"; dimension "4_4";
ST4.03ch04	as_event	59097536	59098338	-	transcript_id "StLNC2769/StLNC2468/StLNC1804,StLNC2167,StLNC1631/StLNC1463,StLNC0497,StLNC2234"; gene_id "ST4.03ch04:59015476-59098778C"; flanks "59098338^,59097536-"; structure "1-2^,1-2^5-6^,1-2^7-8^10-11^,1-2^7-9^,3-4^5-6^"; splice_chain "59098277-59098251^,59098277-59098251^59097932-59097867^,59098277-59098251^59097800-59097768^59097635-59097603^,59098277-59098251^59097800-59097735^,59098217-…
ST4.03ch04	as_event	59097503	59097768	-	transcript_id "StLNC0651,StLNC2275,StLNC2817/StLNC2808"; gene_id "ST4.03ch04:59015476-59098778C"; flanks "59097768^,59097503-"; structure "0,1-2^3-4^,5-6^"; splice_chain ",59097701-59097669^59097602-59097570^,59097569-59097537^"; sources "Undefined,Undefined,Undefined"; NMorMRNA "null"; degree "9"; dimension "3_3";
ST4.03ch04	as_event	59097503	59098515	-	transcript_id "StLNC2454,StLNC2275,StLNC2449,StLNC2817/StLNC2808"; gene_id "ST4.03ch04:59015476-59098778C"; flanks "59098515[,59097503-"; structure "1^3-5^8-9^16-17^,1^4-5^8-9^12-13^14-15^16-17^,1^4-5^8-9^16-17^,2^6-7^10-11^12-13^18-19^"; splice_chain "59098467^59098400-59098338^59098277-59098251^59097602-59097570^,59098467^59098370-59098338^59098277-59098251^59097800-59097768^59097701-59097669^5…
ST4.03ch04	as_event	59097471	59097768	-	transcript_id "StLNC2275,StLNC1631/StLNC1463"; gene_id "ST4.03ch04:59015476-59098778C"; flanks "59097768^,59097471^"; structure "1-2^5-6^8-,3-4^7-"; splice_chain "59097701-59097669^59097602-59097570^59097503-,59097635-59097603^59097536-"; sources "Undefined,Undefined"; NMorMRNA "null"; degree "4"; dimension "2_2";
ST4.03ch04	as_event	59097471	59098251	-	transcript_id "StLNC2275,StLNC1631/StLNC1463,StLNC2769/StLNC2468"; gene_id "ST4.03ch04:59015476-59098778C"; flanks "59098251^,59097471^"; structure "1-2^3-4^7-8^10-,1-2^5-6^9-,9-"; splice_chain "59097800-59097768^59097701-59097669^59097602-59097570^59097503-,59097800-59097768^59097635-59097603^59097536-,59097536-"; sources "Undefined,Undefined,Undefined"; NMorMRNA "null"; degree "9"; dimension "3…
ST4.03ch04	as_event	59097471	59098338	-	transcript_id "StLNC2275,StLNC1631/StLNC1463,StLNC2769/StLNC2468,StLNC2234"; gene_id "ST4.03ch04:59015476-59098778C"; flanks "59098338^,59097471^"; structure "1-2^7-8^9-10^13-14^16-,1-2^7-8^11-12^15-,1-2^15-,3-4^5-6^15-"; splice_chain "59098277-59098251^59097800-59097768^59097701-59097669^59097602-59097570^59097503-,59098277-59098251^59097800-59097768^59097635-59097603^59097536-,59098277-59098251…
ST4.03ch04	as_event	59097413	59097536	-	transcript_id "StLNC1804,StLNC1631/StLNC2234/StLNC2468/StLNC1463,StLNC2167"; gene_id "ST4.03ch04:59015476-59098778C"; flanks "59097536-,59097413-"; structure "1^,2^,3^"; splice_chain "59097504^,59097471^,59097468^"; sources "Undefined,Undefined,Undefined"; NMorMRNA "null"; degree "9"; dimension "3_3";
ST4.03ch04	as_event	59097413	59097867	-	transcript_id "StLNC2418,StLNC2234,StLNC2167"; gene_id "ST4.03ch04:59015476-59098778C"; flanks "59097867^,59097413-"; structure "0,1-2^,1-3^"; splice_chain ",59097536-59097471^,59097536-59097468^"; sources "Undefined,Undefined,Undefined"; NMorMRNA "null"; degree "9"; dimension "3_3";
ST4.03ch04	as_event	59097413	59098251	-	transcript_id "StLNC2418,StLNC2167,StLNC2275,StLNC1631/StLNC1463,StLNC1804,StLNC2468"; gene_id "ST4.03ch04:59015476-59098778C"; flanks "59098251^,59097413-"; structure "1-2^,1-2^11-15^,3-4^5-6^9-10^13-14^,3-4^7-8^11-14^,11-12^,11-14^"; splice_chain "59097932-59097867^,59097932-59097867^59097536-59097468^,59097800-59097768^59097701-59097669^59097602-59097570^59097503-59097471^,59097800-59097768^59…
ST4.03ch04	as_event	59097413	59098338	-	transcript_id "StLNC2418,StLNC2167,StLNC2275,StLNC1631/StLNC1463,StLNC1804,StLNC2468,StLNC2234"; gene_id "ST4.03ch04:59015476-59098778C"; flanks "59098338^,59097413-"; structure "1-2^5-6^,1-2^5-6^15-19^,1-2^7-8^9-10^13-14^17-18^,1-2^7-8^11-12^15-18^,1-2^15-16^,1-2^15-18^,3-4^5-6^15-18^"; splice_chain "59098277-59098251^59097932-59097867^,59098277-59098251^59097932-59097867^59097536-59097468^,5909…
ST4.03ch04	as_event	59097365	59097503	-	transcript_id "StLNC2454,StLNC2275"; gene_id "ST4.03ch04:59015476-59098778C"; flanks "59097503-,59097365]"; structure "0,1^2-"; splice_chain ",59097471^59097413-"; sources "Undefined,Undefined"; NMorMRNA "null"; degree "4"; dimension "2_2";
ST4.03ch04	as_event	59097365	59098251	-	transcript_id "StLNC2167,StLNC2418,StLNC2275,StLNC1631/StLNC1463,StLNC2454,StLNC1804,StLNC2468"; gene_id "ST4.03ch04:59015476-59098778C"; flanks "59098251^,59097365]"; structure "1-2^11-15^16-,1-2^16-,3-4^5-6^9-10^13-14^16-,3-4^7-8^11-14^16-,9-10^13-,11-12^16-,11-14^16-"; splice_chain "59097932-59097867^59097536-59097468^59097413-,59097932-59097867^59097413-,59097800-59097768^59097701-59097669^59…
ST4.03ch04	as_event	59097365	59098338	-	transcript_id "StLNC2167,StLNC2418,StLNC2275,StLNC1631/StLNC1463,StLNC2454,StLNC1804,StLNC2468,StLNC2234"; gene_id "ST4.03ch04:59015476-59098778C"; flanks "59098338^,59097365]"; structure "1-2^5-6^15-19^20-,1-2^5-6^20-,1-2^7-8^9-10^13-14^17-18^20-,1-2^7-8^11-12^15-18^20-,1-2^13-14^17-,1-2^15-16^20-,1-2^15-18^20-,3-4^5-6^15-18^20-"; splice_chain "59098277-59098251^59097932-59097867^59097536-590974…
ST4.03ch04	as_event	59085876	59097800	-	transcript_id "StLNC2817,StLNC0497"; gene_id "ST4.03ch04:59015476-59098778C"; flanks "59097800-,59085876-"; structure "1^3-4^7-8^,2^5-6^"; splice_chain "59097768^59097569-59097537^59097503-59097414^,59097735^59097536-59097504^"; sources "Undefined,Undefined"; NMorMRNA "null"; degree "4"; dimension "2_2";
ST4.03ch04	as_event	59085876	59098467	-	transcript_id "StLNC0497,StLNC0721"; gene_id "ST4.03ch04:59015476-59098778C"; flanks "59098467^,59085876-"; structure "1-2^3-4^7-8^9-10^,5-6^"; splice_chain "59098370-59098338^59098277-59098251^59097800-59097735^59097536-59097504^,59098064-59098062^"; sources "Undefined,Undefined"; NMorMRNA "null"; degree "4"; dimension "2_2";
ST4.03ch04	as_event	59085876	59098542	-	transcript_id "StLNC0940,StLNC0721"; gene_id "ST4.03ch04:59015476-59098778C"; flanks "59098542[,59085876-"; structure "1^,2^3-4^"; splice_chain "59098494^,59098467^59098064-59098062^"; sources "Undefined,Undefined"; NMorMRNA "null"; degree "4"; dimension "2_2";
ST4.03ch04	as_event	59036330	59085876	-	transcript_id "StLNC0721/StLNC2817,StLNC0940"; gene_id "ST4.03ch04:59015476-59098778C"; flanks "59085876-,59036330-"; structure "1^,2^"; splice_chain "59085820^,59085745^"; sources "Undefined,Undefined"; NMorMRNA "null"; degree "4"; dimension "2_2";
ST4.03ch04	as_event	59035535	59064308	-	transcript_id "StLNC2419,StLNC0615"; gene_id "ST4.03ch04:59015476-59098778C"; flanks "59064308^,59035535-"; structure "1-2^,3-4^"; splice_chain "59036090-59036049^,59035982-59035941^"; sources "Undefined,Undefined"; NMorMRNA "null"; degree "4"; dimension "2_2";
ST4.03ch04	as_event	59030644	59050414	-	transcript_id "StLNC0624,StLNC2410"; gene_id "ST4.03ch04:59015476-59098778C"; flanks "59050414-,59030644^"; structure "1^4-,2^3-"; splice_chain "59050337^59030679-,59050301^59030727-"; sources "Undefined,Undefined"; NMorMRNA "null"; degree "4"; dimension "2_2";
ST4.03ch04	as_event	59023782	59036046	-	transcript_id "StLNC0882,StLNC1032"; gene_id "ST4.03ch04:59015476-59098778C"; flanks "59036046^,59023782-"; structure "0,1-2^"; splice_chain ",59024058-59023921^"; sources "Undefined,Undefined"; NMorMRNA "null"; degree "4"; dimension "2_2";
ST4.03ch04	as_event	59023782	59079818	-	transcript_id "StLNC1925,StLNC0882"; gene_id "ST4.03ch04:59015476-59098778C"; flanks "59079818^,59023782-"; structure "1-2^,3-4^"; splice_chain "59036198-59036154^,59036090-59036046^"; sources "Undefined,Undefined"; NMorMRNA "null"; degree "4"; dimension "2_2";
ST4.03ch04	as_event	59023534	59036262	-	transcript_id "StLNC0721,StLNC0583"; gene_id "ST4.03ch04:59015476-59098778C"; flanks "59036262^,59023534^"; structure "1-,2-"; splice_chain "59023782-,59023644-"; sources "Undefined,Undefined"; NMorMRNA "null"; degree "4"; dimension "2_2";
ST4.03ch04	as_event	59015785	59016667	-	transcript_id "StLNC1517,StLNC0940"; gene_id "ST4.03ch04:59015476-59098778C"; flanks "59016667-,59015785-"; structure "1^3-4^,2^"; splice_chain "59016603^59015959-59015900^,59016596^"; sources "Undefined,Undefined"; NMorMRNA "null"; degree "4"; dimension "2_2";
ST4.03ch04	as_event	59015785	59016743	-	transcript_id "StLNC1832/StLNC2008,StLNC1827,StLNC1842"; gene_id "ST4.03ch04:59015476-59098778C"; flanks "59016743-,59015785-"; structure "1^,2^,3^"; splice_chain "59016695^,59016626^,59016596^"; sources "Undefined,Undefined,Undefined"; NMorMRNA "null"; degree "9"; dimension "3_3";
ST4.03ch04	as_event	59015696	59015785	-	transcript_id "StLNC2008,StLNC1842/StLNC0940/StLNC1827/StLNC1269/StLNC2147"; gene_id "ST4.03ch04:59015476-59098778C"; flanks "59015785-,59015696^"; structure "0,1^2-"; splice_chain ",59015783^59015746-"; sources "Undefined,Undefined"; NMorMRNA "null"; degree "4"; dimension "2_2";
ST4.03ch04	as_event	59015665	59015785	-	transcript_id "StLNC1842/StLNC0940/StLNC1827/StLNC1269/StLNC2147,StLNC0815,StLNC2008"; gene_id "ST4.03ch04:59015476-59098778C"; flanks "59015785-,59015665-"; structure "1^2-4^,3^,4^"; splice_chain "59015783^59015746-59015696^,59015699^,59015696^"; sources "Undefined,Undefined,Undefined"; NMorMRNA "null"; degree "9"; dimension "3_3";
ST4.03ch04	as_event	59015665	59016596	-	transcript_id "StLNC1840/StLNC1711/StLNC1929,StLNC1842/StLNC0940"; gene_id "ST4.03ch04:59015476-59098778C"; flanks "59016596^,59015665-"; structure "0,1-2^3-4^"; splice_chain ",59015785-59015783^59015746-59015696^"; sources "Undefined,Undefined"; NMorMRNA "null"; degree "4"; dimension "2_2";
ST4.03ch04	as_event	59015665	59016695	-	transcript_id "StLNC0004,StLNC2008"; gene_id "ST4.03ch04:59015476-59098778C"; flanks "59016695^,59015665-"; structure "0,1-2^"; splice_chain ",59015785-59015696^"; sources "Undefined,Undefined"; NMorMRNA "null"; degree "4"; dimension "2_2";
ST4.03ch04	as_event	59015665	59016743	-	transcript_id "StLNC0004,StLNC2008,StLNC1827,StLNC1840/StLNC1711/StLNC1929,StLNC1842"; gene_id "ST4.03ch04:59015476-59098778C"; flanks "59016743-,59015665-"; structure "1^,1^4-7^,2^4-5^6-7^,3^,3^4-5^6-7^"; splice_chain "59016695^,59016695^59015785-59015696^,59016626^59015785-59015783^59015746-59015696^,59016596^,59016596^59015785-59015783^59015746-59015696^"; sources "Undefined,Undefined,Undefine…
ST4.03ch04	as_event	59015620	59015783	-	transcript_id "StLNC1832,StLNC1842/StLNC0940/StLNC1269"; gene_id "ST4.03ch04:59015476-59098778C"; flanks "59015783^,59015620-"; structure "0,1-2^3-4^"; splice_chain ",59015746-59015696^59015665-59015663^"; sources "Undefined,Undefined"; NMorMRNA "null"; degree "4"; dimension "2_2";
ST4.03ch04	as_event	59015620	59016743	-	transcript_id "StLNC1832,StLNC1842,StLNC1840"; gene_id "ST4.03ch04:59015476-59098778C"; flanks "59016743-,59015620-"; structure "1^3-4^,2^3-4^5-6^7-8^,2^7-8^"; splice_chain "59016695^59015785-59015783^,59016596^59015785-59015783^59015746-59015696^59015665-59015663^,59016596^59015665-59015663^"; sources "Undefined,Undefined,Undefined"; NMorMRNA "null"; degree "9"; dimension "3_3";
ST4.03ch04	as_event	59015575	59015665	-	transcript_id "StLNC2008/StLNC0004,StLNC1827/StLNC1711,StLNC1929/StLNC2147"; gene_id "ST4.03ch04:59015476-59098778C"; flanks "59015665-,59015575-"; structure "1^,2^,3^"; splice_chain "59015641^,59015630^,59015627^"; sources "Undefined,Undefined,Undefined"; NMorMRNA "null"; degree "9"; dimension "3_3";
ST4.03ch04	as_event	59015527	59015665	-	transcript_id "StLNC0049/StLNC0815,StLNC0940/StLNC1269,StLNC0004,StLNC1827"; gene_id "ST4.03ch04:59015476-59098778C"; flanks "59015665-,59015527]"; structure "0,1^4-,2^5-,3^5-"; splice_chain ",59015663^59015620-,59015641^59015575-,59015630^59015575-"; sources "Undefined,Undefined,Undefined,Undefined"; NMorMRNA "null"; degree "16"; dimension "4_4";
ST4.03ch04	as_event	59015527	59015783	-	transcript_id "StLNC0940/StLNC1269,StLNC1827,StLNC1832"; gene_id "ST4.03ch04:59015476-59098778C"; flanks "59015783^,59015527]"; structure "1-2^3-4^6-,1-2^3-5^7-,6-"; splice_chain "59015746-59015696^59015665-59015663^59015620-,59015746-59015696^59015665-59015630^59015575-,59015620-"; sources "Undefined,Undefined,Undefined"; NMorMRNA "null"; degree "9"; dimension "3_3";
ST4.03ch04	as_event	59015527	59015785	-	transcript_id "StLNC0940/StLNC1269,StLNC1827,StLNC1832,StLNC1517,StLNC0815"; gene_id "ST4.03ch04:59015476-59098778C"; flanks "59015785-,59015527]"; structure "1^3-5^6-7^9-,1^3-5^6-8^11-,1^9-,2^10-,4^6-"; splice_chain "59015783^59015746-59015696^59015665-59015663^59015620-,59015783^59015746-59015696^59015665-59015630^59015575-,59015783^59015620-,59015755^59015593-,59015699^59015665-"; sources "Und…
ST4.03ch04	as_event	59015527	59016695	-	transcript_id "StLNC1832,StLNC0004"; gene_id "ST4.03ch04:59015476-59098778C"; flanks "59016695^,59015527]"; structure "1-2^5-,3-4^6-"; splice_chain "59015785-59015783^59015620-,59015665-59015641^59015575-"; sources "Undefined,Undefined"; NMorMRNA "null"; degree "4"; dimension "2_2";
ST4.03ch04	as_event	59015527	59016743	-	transcript_id "StLNC1832,StLNC0004,StLNC1827"; gene_id "ST4.03ch04:59015476-59098778C"; flanks "59016743-,59015527]"; structure "1^3-4^10-,1^7-8^11-,2^3-4^5-6^7-9^11-"; splice_chain "59016695^59015785-59015783^59015620-,59016695^59015665-59015641^59015575-,59016626^59015785-59015783^59015746-59015696^59015665-59015630^59015575-"; sources "Undefined,Undefined,Undefined"; NMorMRNA "null"; degree "9…
ST4.03ch04	as_event	59015527	59023644	-	transcript_id "StLNC0940,StLNC1280"; gene_id "ST4.03ch04:59015476-59098778C"; flanks "59023644-,59015527]"; structure "1^3-4^5-6^7-8^9-10^11-,2^12-"; splice_chain "59023612^59016667-59016596^59015785-59015783^59015746-59015696^59015665-59015663^59015620-,59023534^59015575-"; sources "Undefined,Undefined"; NMorMRNA "null"; degree "4"; dimension "2_2";
ST4.03ch04	as_event	59015476	59015665	-	transcript_id "StLNC1842/StLNC1840,StLNC1711"; gene_id "ST4.03ch04:59015476-59098778C"; flanks "59015665-,59015476]"; structure "1^3-,2^4-"; splice_chain "59015663^59015620-,59015630^59015575-"; sources "Undefined,Undefined"; NMorMRNA "null"; degree "4"; dimension "2_2";
ST4.03ch04	as_event	61564858	61566028	-	transcript_id "StLNC0727,StLNC1341"; gene_id "ST4.03ch04:61548863-61566352C"; flanks "61566028^,61564858^"; structure "1-,2-"; splice_chain "61565015-,61564931-"; sources "Undefined,Undefined"; NMorMRNA "null"; degree "4"; dimension "2_2";
ST4.03ch04	as_event	65426837	65433557	-	transcript_id "StLNC1819,StLNC0749"; gene_id "ST4.03ch04:65421071-65446706C"; flanks "65433557^,65426837-"; structure "0,1-2^"; splice_chain ",65433451-65433357^"; sources "Undefined,Undefined"; NMorMRNA "null"; degree "4"; dimension "2_2";
ST4.03ch04	as_event	65426518	65433357	-	transcript_id "StLNC0749,StLNC2261"; gene_id "ST4.03ch04:65421071-65446706C"; flanks "65433357^,65426518^"; structure "1-,2-"; splice_chain "65426837-,65426688-"; sources "Undefined,Undefined"; NMorMRNA "null"; degree "4"; dimension "2_2";
ST4.03ch04	as_event	65426518	65433557	-	transcript_id "StLNC0749,StLNC2261,StLNC1819"; gene_id "ST4.03ch04:65421071-65446706C"; flanks "65433557^,65426518^"; structure "1-2^3-,1-2^4-,3-"; splice_chain "65433451-65433357^65426837-,65433451-65433357^65426688-,65426837-"; sources "Undefined,Undefined,Undefined"; NMorMRNA "null"; degree "9"; dimension "3_3";
ST4.03ch04	as_event	65424441	65433357	-	transcript_id "StLNC2679,StLNC0749,StLNC2261"; gene_id "ST4.03ch04:65421071-65446706C"; flanks "65433357^,65424441-"; structure "0,1-3^,2-3^"; splice_chain ",65426837-65426518^,65426688-65426518^"; sources "Undefined,Undefined,Undefined"; NMorMRNA "null"; degree "9"; dimension "3_3";
ST4.03ch04	as_event	65424441	65433557	-	transcript_id "StLNC2679,StLNC0749,StLNC2261,StLNC1819"; gene_id "ST4.03ch04:65421071-65446706C"; flanks "65433557^,65424441-"; structure "1-2^,1-2^3-5^,1-2^4-5^,3-5^"; splice_chain "65433451-65433357^,65433451-65433357^65426837-65426518^,65433451-65433357^65426688-65426518^,65426837-65426518^"; sources "Undefined,Undefined,Undefined,Undefined"; NMorMRNA "null"; degree "16"; dimension "4_4";
ST4.03ch05	as_event	16055075	16058082	+	transcript_id "StLNC1862,StLNC1725"; gene_id "ST4.03ch05:16054959-16058257W"; flanks "16055075^,16058082-"; structure "0,1-2^3-4^"; splice_chain ",16056509-16056556^16056699-16056769^"; sources "Undefined,Undefined"; NMorMRNA "null"; degree "4"; dimension "2_2";
ST4.03ch05	as_event	34966536	34970835	+	transcript_id "StLNC1532,StLNC2143,StLNC2017"; gene_id "ST4.03ch05:34965549-34971504W"; flanks "34966536^,34970835-"; structure "0,1-2^,3-4^"; splice_chain ",34969110-34969220^,34970279-34970320^"; sources "Undefined,Undefined,Undefined"; NMorMRNA "null"; degree "9"; dimension "3_3";
ST4.03ch05	as_event	38143988	38144153	+	transcript_id "StLNC0861,StLNC2851"; gene_id "ST4.03ch05:38142577-38161241W"; flanks "38143988^,38144153^"; structure "1-,2-"; splice_chain "38144079-,38144095-"; sources "Undefined,Undefined"; NMorMRNA "null"; degree "4"; dimension "2_2";
ST4.03ch05	as_event	979327	980951	-	transcript_id "StLNC1016,StLNC0844"; gene_id "ST4.03ch05:977324-981094C"; flanks "980951[,979327^"; structure "1^4-,2^3-"; splice_chain "980426^979742-,980268^980247-"; sources "Undefined,Undefined"; NMorMRNA "null"; degree "4"; dimension "2_2";
ST4.03ch05	as_event	979142	979327	-	transcript_id "StLNC0818/StLNC0112/StLNC1990,StLNC1016"; gene_id "ST4.03ch05:977324-981094C"; flanks "979327^,979142^"; structure "1-,2-"; splice_chain "979235-,979229-"; sources "Undefined,Undefined"; NMorMRNA "null"; degree "4"; dimension "2_2";
ST4.03ch05	as_event	978523	979327	-	transcript_id "StLNC1962,StLNC1016"; gene_id "ST4.03ch05:977324-981094C"; flanks "979327^,978523]"; structure "1-,2-3^4-"; splice_chain "979235-,979229-979142^978939-"; sources "Undefined,Undefined"; NMorMRNA "null"; degree "4"; dimension "2_2";
ST4.03ch05	as_event	3747117	3747465	-	transcript_id "StLNC2391,StLNC0200"; gene_id "ST4.03ch05:3743126-3747684C"; flanks "3747465^,3747117^"; structure "1-,2-"; splice_chain "3747230-,3747194-"; sources "Undefined,Undefined"; NMorMRNA "null"; degree "4"; dimension "2_2";
ST4.03ch05	as_event	8638807	8639232	-	transcript_id "StLNC0271,StLNC2360"; gene_id "ST4.03ch05:8632948-8639465C"; flanks "8639232^,8638807-"; structure "0,1-2^"; splice_chain ",8638988-8638932^"; sources "Undefined,Undefined"; NMorMRNA "null"; degree "4"; dimension "2_2";
ST4.03ch05	as_event	8636938	8639232	-	transcript_id "StLNC0483,StLNC2360,StLNC0271"; gene_id "ST4.03ch05:8632948-8639465C"; flanks "8639232^,8636938-"; structure "0,1-2^3-4^,3-4^"; splice_chain ",8638988-8638932^8638807-8638738^,8638807-8638738^"; sources "Undefined,Undefined,Undefined"; NMorMRNA "null"; degree "9"; dimension "3_3";
ST4.03ch05	as_event	8633167	8639232	-	transcript_id "StLNC1417,StLNC0483"; gene_id "ST4.03ch05:8632948-8639465C"; flanks "8639232^,8633167-"; structure "0,1-2^"; splice_chain ",8636938-8636884^"; sources "Undefined,Undefined"; NMorMRNA "null"; degree "4"; dimension "2_2";
ST4.03ch05	as_event	11563144	11564455	-	transcript_id "StLNC1156,StLNC0628/StLNC1474"; gene_id "ST4.03ch05:11559972-11564643C"; flanks "11564455^,11563144-"; structure "0,1-2^"; splice_chain ",11564256-11564194^"; sources "Undefined,Undefined"; NMorMRNA "null"; degree "4"; dimension "2_2";
ST4.03ch05	as_event	13527757	13549014	-	transcript_id "StLNC2196,StLNC1353"; gene_id "ST4.03ch05:13504097-13551332C"; flanks "13549014^,13527757-"; structure "0,1-2^"; splice_chain ",13542073-13541861^"; sources "Undefined,Undefined"; NMorMRNA "null"; degree "4"; dimension "2_2";
ST4.03ch05	as_event	45016843	45017921	-	transcript_id "StLNC0746,StLNC0277"; gene_id "ST4.03ch05:45015944-45018295C"; flanks "45017921^,45016843^"; structure "1-,2-"; splice_chain "45016920-,45016891-"; sources "Undefined,Undefined"; NMorMRNA "null"; degree "4"; dimension "2_2";
ST4.03ch05	as_event	47514822	47517849	-	transcript_id "StLNC0810,StLNC2848"; gene_id "ST4.03ch05:47514822-47518049C"; flanks "47517849^,47514822]"; structure "1-,2-"; splice_chain "47515151-,47515145-"; sources "Undefined,Undefined"; NMorMRNA "null"; degree "4"; dimension "2_2";
ST4.03ch06	as_event	5466318	5485661	+	transcript_id "StLNC0445,StLNC2432"; gene_id "ST4.03ch06:5465940-5490101W"; flanks "5466318^,5485661-"; structure "0,1-2^"; splice_chain ",5485415-5485474^"; sources "Undefined,Undefined"; NMorMRNA "null"; degree "4"; dimension "2_2";
ST4.03ch06	as_event	5466318	5485950	+	transcript_id "StLNC1828,StLNC2432,StLNC0445"; gene_id "ST4.03ch06:5465940-5490101W"; flanks "5466318^,5485950-"; structure "0,1-2^3-4^,3-4^"; splice_chain ",5485415-5485474^5485661-5485730^,5485661-5485730^"; sources "Undefined,Undefined,Undefined"; NMorMRNA "null"; degree "9"; dimension "3_3";
ST4.03ch06	as_event	7497489	7497983	+	transcript_id "StLNC1258,StLNC1683"; gene_id "ST4.03ch06:7497489-7498061W"; flanks "7497489[,7497983-"; structure "1^,2^"; splice_chain "7497783^,7497804^"; sources "Undefined,Undefined"; NMorMRNA "null"; degree "4"; dimension "2_2";
ST4.03ch06	as_event	11645010	11646626	+	transcript_id "StLNC0444,StLNC0434"; gene_id "ST4.03ch06:11643993-11647011W"; flanks "11645010^,11646626-"; structure "0,1-2^"; splice_chain ",11646011-11646111^"; sources "Undefined,Undefined"; NMorMRNA "null"; degree "4"; dimension "2_2";
ST4.03ch06	as_event	26754219	26765626	+	transcript_id "StLNC0508,StLNC2496"; gene_id "ST4.03ch06:26754109-26765886W"; flanks "26754219^,26765626-"; structure "0,1-2^"; splice_chain ",26754307-26754374^"; sources "Undefined,Undefined"; NMorMRNA "null"; degree "4"; dimension "2_2";
ST4.03ch06	as_event	35943882	35944798	+	transcript_id "StLNC2696,StLNC0839"; gene_id "ST4.03ch06:35943757-35961627W"; flanks "35943882^,35944798-"; structure "0,1-2^"; splice_chain ",35944056-35944145^"; sources "Undefined,Undefined"; NMorMRNA "null"; degree "4"; dimension "2_2";
ST4.03ch06	as_event	35955398	35959469	+	transcript_id "StLNC2696/StLNC1708/StLNC2842,StLNC1965"; gene_id "ST4.03ch06:35943757-35961627W"; flanks "35955398^,35959469-"; structure "0,1-2^"; splice_chain ",35956833-35956866^"; sources "Undefined,Undefined"; NMorMRNA "null"; degree "4"; dimension "2_2";
ST4.03ch06	as_event	49882881	49886211	+	transcript_id "StLNC2046,StLNC1174"; gene_id "ST4.03ch06:49882881-49886211W"; flanks "49882881[,49886211]"; structure "1^3-,2^4-"; splice_chain "49882971^49886014-,49883120^49886163-"; sources "Undefined,Undefined"; NMorMRNA "null"; degree "4"; dimension "2_2";
ST4.03ch06	as_event	57643388	57651444	+	transcript_id "StLNC0123,StLNC2520"; gene_id "ST4.03ch06:57643388-57651444W"; flanks "57643388[,57651444]"; structure "1^3-,2^4-"; splice_chain "57643677^57651382-,57643692^57651397-"; sources "Undefined,Undefined"; NMorMRNA "null"; degree "4"; dimension "2_2";
ST4.03ch06	as_event	58320551	58321775	+	transcript_id "StLNC2398,StLNC1847"; gene_id "ST4.03ch06:58320369-58322170W"; flanks "58320551^,58321775^"; structure "1-,2-"; splice_chain "58321555-,58321665-"; sources "Undefined,Undefined"; NMorMRNA "null"; degree "4"; dimension "2_2";
ST4.03ch06	as_event	30890419	30892199	-	transcript_id "StLNC1702,StLNC1263"; gene_id "ST4.03ch06:30890419-30892384C"; flanks "30892199^,30890419]"; structure "1-,2-"; splice_chain "30890515-,30890467-"; sources "Undefined,Undefined"; NMorMRNA "null"; degree "4"; dimension "2_2";
ST4.03ch06	as_event	40940438	40941126	-	transcript_id "StLNC1946/StLNC1018,StLNC2609"; gene_id "ST4.03ch06:40932748-40941126C"; flanks "40941126[,40940438^"; structure "0,1^2-"; splice_chain ",40941108^40940990-"; sources "Undefined,Undefined"; NMorMRNA "null"; degree "4"; dimension "2_2";
ST4.03ch06	as_event	40934799	40936420	-	transcript_id "StLNC1656,StLNC1946/StLNC2609"; gene_id "ST4.03ch06:40932748-40941126C"; flanks "40936420-,40934799-"; structure "1^,2^"; splice_chain "40936339^,40935278^"; sources "Undefined,Undefined"; NMorMRNA "null"; degree "4"; dimension "2_2";
ST4.03ch06	as_event	40934799	40940438	-	transcript_id "StLNC2499,StLNC1656,StLNC1946/StLNC2609"; gene_id "ST4.03ch06:40932748-40941126C"; flanks "40940438^,40934799-"; structure "0,1-2^,1-3^"; splice_chain ",40936420-40936339^,40936420-40935278^"; sources "Undefined,Undefined,Undefined"; NMorMRNA "null"; degree "9"; dimension "3_3";
ST4.03ch06	as_event	40934358	40934726	-	transcript_id "StLNC0321,StLNC2648"; gene_id "ST4.03ch06:40932748-40941126C"; flanks "40934726^,40934358^"; structure "1-,2-"; splice_chain "40934490-,40934396-"; sources "Undefined,Undefined"; NMorMRNA "null"; degree "4"; dimension "2_2";
ST4.03ch06	as_event	40934251	40934726	-	transcript_id "StLNC2531/StLNC1946/StLNC2609/StLNC0356/StLNC2499/StLNC0485/StLNC0363/StLNC1656/StLNC1849,StLNC0321,StLNC2648"; gene_id "ST4.03ch06:40932748-40941126C"; flanks "40934726^,40934251-"; structure "0,1-3^,2-3^"; splice_chain ",40934490-40934358^,40934396-40934358^"; sources "Undefined,Undefined,Undefined"; NMorMRNA "null"; degree "9"; dimension "3_3";
ST4.03ch06	as_event	40934251	40940438	-	transcript_id "StLNC1018,StLNC1656,StLNC1946/StLNC2609,StLNC2499"; gene_id "ST4.03ch06:40932748-40941126C"; flanks "40940438^,40934251-"; structure "0,1-2^4-5^,1-3^4-5^,4-5^"; splice_chain ",40936420-40936339^40934799-40934726^,40936420-40935278^40934799-40934726^,40934799-40934726^"; sources "Undefined,Undefined,Undefined,Undefined"; NMorMRNA "null"; degree "16"; dimension "4_4";
ST4.03ch06	as_event	40933513	40934135	-	transcript_id "StLNC2531,StLNC2609/StLNC0363"; gene_id "ST4.03ch06:40932748-40941126C"; flanks "40934135^,40933513^"; structure "1-,2-"; splice_chain "40934063-,40934052-"; sources "Undefined,Undefined"; NMorMRNA "null"; degree "4"; dimension "2_2";
ST4.03ch06	as_event	40933513	40934251	-	transcript_id "StLNC1849,StLNC2531,StLNC2609/StLNC0363,StLNC0356,StLNC2499"; gene_id "ST4.03ch06:40932748-40941126C"; flanks "40934251-,40933513^"; structure "0,1^2-,1^3-,4^5-,6^7-"; splice_chain ",40934135^40934063-,40934135^40934052-,40933973^40933866-,40933835^40933743-"; sources "Undefined,Undefined,Undefined,Undefined,Undefined"; NMorMRNA "null"; degree "25"; dimension "5_5";
ST4.03ch06	as_event	40933513	40934726	-	transcript_id "StLNC0591,StLNC1849,StLNC2531,StLNC2609/StLNC0363,StLNC0356,StLNC2499"; gene_id "ST4.03ch06:40932748-40941126C"; flanks "40934726^,40933513^"; structure "1-,2-,2-3^4-,2-3^5-,2-6^7-,2-8^9-"; splice_chain "40934490-,40934251-,40934251-40934135^40934063-,40934251-40934135^40934052-,40934251-40933973^40933866-,40934251-40933835^40933743-"; sources "Undefined,Undefined,Undefined,Undefin…
ST4.03ch06	as_event	40933450	40934251	-	transcript_id "StLNC1946/StLNC0321,StLNC2648"; gene_id "ST4.03ch06:40932748-40941126C"; flanks "40934251-,40933450^"; structure "0,1^2-"; splice_chain ",40934135^40934052-"; sources "Undefined,Undefined"; NMorMRNA "null"; degree "4"; dimension "2_2";
ST4.03ch06	as_event	40933156	40934490	-	transcript_id "StLNC0321,StLNC0591"; gene_id "ST4.03ch06:40932748-40941126C"; flanks "40934490-,40933156-"; structure "1^2-4^,3^"; splice_chain "40934358^40934251-40933450^,40933513^"; sources "Undefined,Undefined"; NMorMRNA "null"; degree "4"; dimension "2_2";
ST4.03ch06	as_event	40933156	40934726	-	transcript_id "StLNC0321,StLNC0591,StLNC2648,StLNC1946"; gene_id "ST4.03ch06:40932748-40941126C"; flanks "40934726^,40933156-"; structure "1-3^4-8^,1-7^,2-3^4-5^6-8^,4-8^"; splice_chain "40934490-40934358^40934251-40933450^,40934490-40933513^,40934396-40934358^40934251-40934135^40934052-40933450^,40934251-40933450^"; sources "Undefined,Undefined,Undefined,Undefined"; NMorMRNA "null"; degree "16";…
ST4.03ch06	as_event	40932883	40934251	-	transcript_id "StLNC2648,StLNC1849"; gene_id "ST4.03ch06:40932748-40941126C"; flanks "40934251-,40932883]"; structure "1^2-4^5-,3^6-"; splice_chain "40934135^40934052-40933450^40933156-,40933513^40933136-"; sources "Undefined,Undefined"; NMorMRNA "null"; degree "4"; dimension "2_2";
ST4.03ch06	as_event	40932763	40934251	-	transcript_id "StLNC0363,StLNC0321"; gene_id "ST4.03ch06:40932748-40941126C"; flanks "40934251-,40932763]"; structure "1^2-3^6-,4^5-"; splice_chain "40934135^40934052-40933513^40933136-,40933450^40933156-"; sources "Undefined,Undefined"; NMorMRNA "null"; degree "4"; dimension "2_2";
ST4.03ch07	as_event	15953225	15954584	+	transcript_id "StLNC0787,StLNC2493"; gene_id "ST4.03ch07:15952755-15954584W"; flanks "15953225^,15954584]"; structure "1-,2-"; splice_chain "15954331-,15954346-"; sources "Undefined,Undefined"; NMorMRNA "null"; degree "4"; dimension "2_2";
ST4.03ch07	as_event	29593202	29593667	+	transcript_id "StLNC0463,StLNC0048/StLNC2771"; gene_id "ST4.03ch07:29554058-29606941W"; flanks "29593202[,29593667^"; structure "0,1^2-"; splice_chain ",29593485^29593582-"; sources "Undefined,Undefined"; NMorMRNA "null"; degree "4"; dimension "2_2";
ST4.03ch07	as_event	29557229	29601502	+	transcript_id "StLNC2011,StLNC2268/StLNC0119"; gene_id "ST4.03ch07:29554058-29606941W"; flanks "29557229^,29601502-"; structure "1-2^,3-4^"; splice_chain "29557313-29557412^,29561909-29562008^"; sources "Undefined,Undefined"; NMorMRNA "null"; degree "4"; dimension "2_2";
ST4.03ch07	as_event	29601502	29603694	+	transcript_id "StLNC2268/StLNC2011/StLNC2299,StLNC0119"; gene_id "ST4.03ch07:29554058-29606941W"; flanks "29601502-,29603694-"; structure "1^,2^"; splice_chain "29601594^,29601604^"; sources "Undefined,Undefined"; NMorMRNA "null"; degree "4"; dimension "2_2";
ST4.03ch07	as_event	29605189	29606367	+	transcript_id "StLNC2553,StLNC1528/StLNC0981"; gene_id "ST4.03ch07:29554058-29606941W"; flanks "29605189^,29606367-"; structure "0,1-2^"; splice_chain ",29605312-29605398^"; sources "Undefined,Undefined"; NMorMRNA "null"; degree "4"; dimension "2_2";
ST4.03ch07	as_event	41144396	41144540	+	transcript_id "StLNC0577,StLNC0573"; gene_id "ST4.03ch07:41144267-41144922W"; flanks "41144396^,41144540^"; structure "1-,2-"; splice_chain "41144445-,41144493-"; sources "Undefined,Undefined"; NMorMRNA "null"; degree "4"; dimension "2_2";
ST4.03ch07	as_event	41144348	41144540	+	transcript_id "StLNC1100,StLNC2550"; gene_id "ST4.03ch07:41144267-41144922W"; flanks "41144348[,41144540^"; structure "1^3-,2^4-"; splice_chain "41144411^41144445-,41144444^41144478-"; sources "Undefined,Undefined"; NMorMRNA "null"; degree "4"; dimension "2_2";
ST4.03ch07	as_event	41144445	41144637	+	transcript_id "StLNC1850,StLNC0577"; gene_id "ST4.03ch07:41144267-41144922W"; flanks "41144445-,41144637]"; structure "1^3-,2^4-"; splice_chain "41144507^41144541-,41144540^41144574-"; sources "Undefined,Undefined"; NMorMRNA "null"; degree "4"; dimension "2_2";
ST4.03ch07	as_event	41144300	41144637	+	transcript_id "StLNC1850,StLNC0573"; gene_id "ST4.03ch07:41144267-41144922W"; flanks "41144300[,41144637]"; structure "1^3-5^7-,2^4-6^8-"; splice_chain "41144348^41144445-41144507^41144541-,41144396^41144493-41144540^41144574-"; sources "Undefined,Undefined"; NMorMRNA "null"; degree "4"; dimension "2_2";
ST4.03ch07	as_event	44346079	44354500	+	transcript_id "StLNC1091,StLNC0723"; gene_id "ST4.03ch07:44346005-44354923W"; flanks "44346079^,44354500-"; structure "0,1-2^"; splice_chain ",44347573-44348049^"; sources "Undefined,Undefined"; NMorMRNA "null"; degree "4"; dimension "2_2";
ST4.03ch07	as_event	47522784	47525099	+	transcript_id "StLNC2309,StLNC0997"; gene_id "ST4.03ch07:47465509-47528472W"; flanks "47522784^,47525099-"; structure "0,1-2^"; splice_chain ",47524156-47524863^"; sources "Undefined,Undefined"; NMorMRNA "null"; degree "4"; dimension "2_2";
ST4.03ch07	as_event	47466227	47525099	+	transcript_id "StLNC2473/StLNC0341,StLNC1418"; gene_id "ST4.03ch07:47465509-47528472W"; flanks "47466227^,47525099-"; structure "0,1-2^"; splice_chain ",47524156-47524863^"; sources "Undefined,Undefined"; NMorMRNA "null"; degree "4"; dimension "2_2";
ST4.03ch07	as_event	47466227	47525265	+	transcript_id "StLNC1391,StLNC1418,StLNC2473/StLNC0341"; gene_id "ST4.03ch07:47465509-47528472W"; flanks "47466227^,47525265-"; structure "0,1-2^3-4^,3-4^"; splice_chain ",47524156-47524863^47525099-47525171^,47525099-47525171^"; sources "Undefined,Undefined,Undefined"; NMorMRNA "null"; degree "9"; dimension "3_3";
ST4.03ch07	as_event	47525467	47527027	+	transcript_id "StLNC2309/StLNC0997/StLNC2805/StLNC2473/StLNC1391,StLNC0823"; gene_id "ST4.03ch07:47465509-47528472W"; flanks "47525467^,47527027^"; structure "1-,2-"; splice_chain "47526678-,47526689-"; sources "Undefined,Undefined"; NMorMRNA "null"; degree "4"; dimension "2_2";
ST4.03ch07	as_event	47527169	47527973	+	transcript_id "StLNC1391,StLNC0997/StLNC2805"; gene_id "ST4.03ch07:47465509-47528472W"; flanks "47527169-,47527973^"; structure "0,1^2-"; splice_chain ",47527780^47527916-"; sources "Undefined,Undefined"; NMorMRNA "null"; degree "4"; dimension "2_2";
ST4.03ch07	as_event	47527027	47527973	+	transcript_id "StLNC2309/StLNC0823/StLNC2473,StLNC1391,StLNC0997/StLNC2805"; gene_id "ST4.03ch07:47465509-47528472W"; flanks "47527027^,47527973^"; structure "1-,2-,2-3^4-"; splice_chain "47527150-,47527169-,47527169-47527780^47527916-"; sources "Undefined,Undefined,Undefined"; NMorMRNA "null"; degree "9"; dimension "3_3";
ST4.03ch07	as_event	47526678	47527973	+	transcript_id "StLNC0398/StLNC1418/StLNC0341,StLNC2309/StLNC2473,StLNC1391,StLNC0997/StLNC2805"; gene_id "ST4.03ch07:47465509-47528472W"; flanks "47526678-,47527973^"; structure "0,1^2-,1^3-,1^3-4^5-"; splice_chain ",47527027^47527150-,47527027^47527169-,47527027^47527169-47527780^47527916-"; sources "Undefined,Undefined,Undefined,Undefined"; NMorMRNA "null"; degree "16"; dimension "4_4";
ST4.03ch07	as_event	47525467	47527973	+	transcript_id "StLNC0398/StLNC1418/StLNC0341,StLNC2309/StLNC2473,StLNC1391,StLNC0997/StLNC2805,StLNC0823"; gene_id "ST4.03ch07:47465509-47528472W"; flanks "47525467^,47527973^"; structure "1-,1-3^4-,1-3^5-,1-3^5-6^7-,2-3^4-"; splice_chain "47526678-,47526678-47527027^47527150-,47526678-47527027^47527169-,47526678-47527027^47527169-47527780^47527916-,47526689-47527027^47527150-"; sources "Undefine…
ST4.03ch07	as_event	1963778	1967887	-	transcript_id "StLNC1914,StLNC0906"; gene_id "ST4.03ch07:1963778-1967887C"; flanks "1967887[,1963778]"; structure "1^3-,2^4-"; splice_chain "1967494^1963920-,1967400^1963826-"; sources "Undefined,Undefined"; NMorMRNA "null"; degree "4"; dimension "2_2";
ST4.03ch07	as_event	3981032	3981789	-	transcript_id "StLNC0549,StLNC2016,StLNC2033"; gene_id "ST4.03ch07:3980455-3982743C"; flanks "3981789^,3981032^"; structure "1-,2-,3-"; splice_chain "3981255-,3981235-,3981232-"; sources "Undefined,Undefined,Undefined"; NMorMRNA "null"; degree "9"; dimension "3_3";
ST4.03ch07	as_event	3980455	3981232	-	transcript_id "StLNC1348,StLNC2033"; gene_id "ST4.03ch07:3980455-3982743C"; flanks "3981232-,3980455]"; structure "0,1^2-"; splice_chain ",3981032^3980897-"; sources "Undefined,Undefined"; NMorMRNA "null"; degree "4"; dimension "2_2";
ST4.03ch07	as_event	3980455	3981789	-	transcript_id "StLNC2016,StLNC1348,StLNC2033"; gene_id "ST4.03ch07:3980455-3982743C"; flanks "3981789^,3980455]"; structure "1-3^4-,2-,2-3^4-"; splice_chain "3981235-3981032^3980897-,3981232-,3981232-3981032^3980897-"; sources "Undefined,Undefined,Undefined"; NMorMRNA "null"; degree "9"; dimension "3_3";
ST4.03ch07	as_event	9325460	9331258	-	transcript_id "StLNC0765/StLNC2856/StLNC0056/StLNC0115/StLNC0948/StLNC0217/StLNC0280/StLNC1823/StLNC1695/StLNC1389/StLNC2625/StLNC0670/StLNC0440/StLNC1398/StLNC0637,StLNC0137/StLNC0138/StLNC2589/StLNC1049/StLNC1465/StLNC2615/StLNC1932/StLNC2665/StLNC1045/StLNC1237"; gene_id "ST4.03ch07:9316460-9336673C"; flanks "9331258^,9325460-"; structure "0,1-2^"; splice_chain ",9326570-9326474^"; sources "Un…
ST4.03ch07	as_event	9324058	9325180	-	transcript_id "StLNC2589/StLNC0948/StLNC1823/StLNC1389/StLNC2625/StLNC2615/StLNC1932/StLNC1045/StLNC0637,StLNC0280"; gene_id "ST4.03ch07:9316460-9336673C"; flanks "9325180-,9324058^"; structure "0,1^2-"; splice_chain ",9325030^9324260-"; sources "Undefined,Undefined"; NMorMRNA "null"; degree "4"; dimension "2_2";
ST4.03ch07	as_event	9323522	9325180	-	transcript_id "StLNC0280,StLNC2589/StLNC0948/StLNC1823/StLNC1389/StLNC2625/StLNC2615/StLNC1932/StLNC1045/StLNC0637,StLNC1695"; gene_id "ST4.03ch07:9316460-9336673C"; flanks "9325180-,9323522-"; structure "1^2-3^,3^,4^"; splice_chain "9325030^9324260-9324058^,9324058^,9323972^"; sources "Undefined,Undefined,Undefined"; NMorMRNA "null"; degree "9"; dimension "3_3";
ST4.03ch07	as_event	9323315	9325180	-	transcript_id "StLNC2665,StLNC1389"; gene_id "ST4.03ch07:9316460-9336673C"; flanks "9325180-,9323315^"; structure "0,1^2-"; splice_chain ",9324058^9323522-"; sources "Undefined,Undefined"; NMorMRNA "null"; degree "4"; dimension "2_2";
ST4.03ch07	as_event	9322827	9325180	-	transcript_id "StLNC0056/StLNC0115/StLNC0217,StLNC0280,StLNC0948/StLNC1823/StLNC2625/StLNC1932/StLNC0637,StLNC1695"; gene_id "ST4.03ch07:9316460-9336673C"; flanks "9325180-,9322827^"; structure "0,1^2-3^5-,3^5-,4^5-"; splice_chain ",9325030^9324260-9324058^9323522-,9324058^9323522-,9323972^9323522-"; sources "Undefined,Undefined,Undefined,Undefined"; NMorMRNA "null"; degree "16"; dimension "4_4";
ST4.03ch07	as_event	9322612	9323522	-	transcript_id "StLNC1389,StLNC0948/StLNC0280/StLNC1823/StLNC1695/StLNC2625/StLNC0637"; gene_id "ST4.03ch07:9316460-9336673C"; flanks "9323522-,9322612-"; structure "1^,2^"; splice_chain "9323315^,9322827^"; sources "Undefined,Undefined"; NMorMRNA "null"; degree "4"; dimension "2_2";
ST4.03ch07	as_event	9322612	9325180	-	transcript_id "StLNC0280,StLNC1389,StLNC0948/StLNC1823/StLNC2625/StLNC0637,StLNC1695,StLNC2665,StLNC0056"; gene_id "ST4.03ch07:9316460-9336673C"; flanks "9325180-,9322612-"; structure "1^2-3^5-7^,3^5-6^,3^5-7^,4^5-7^,6^,7^"; splice_chain "9325030^9324260-9324058^9323522-9322827^,9324058^9323522-9323315^,9324058^9323522-9322827^,9323972^9323522-9322827^,9323315^,9322827^"; sources "Undefined,Undef…
ST4.03ch07	as_event	9322452	9323522	-	transcript_id "StLNC2589/StLNC2615/StLNC1045,StLNC1389,StLNC0948/StLNC0280/StLNC1823/StLNC1695/StLNC2625/StLNC0637"; gene_id "ST4.03ch07:9316460-9336673C"; flanks "9323522-,9322452^"; structure "0,1^3-,2^3-"; splice_chain ",9323315^9322612-,9322827^9322612-"; sources "Undefined,Undefined,Undefined"; NMorMRNA "null"; degree "9"; dimension "3_3";
ST4.03ch07	as_event	9322452	9325180	-	transcript_id "StLNC0137/StLNC0765/StLNC0138/StLNC1049/StLNC0670/StLNC0440/StLNC1398/StLNC1237,StLNC0280,StLNC2589/StLNC2615/StLNC1045,StLNC1389,StLNC0948/StLNC1823/StLNC2625/StLNC0637,StLNC1695,StLNC2665,StLNC0056"; gene_id "ST4.03ch07:9316460-9336673C"; flanks "9325180-,9322452^"; structure "0,1^2-3^5-7^8-,3^5-,3^5-6^8-,3^5-7^8-,4^5-7^8-,6^8-,7^8-"; splice_chain ",9325030^9324260-9324058^932352…
ST4.03ch07	as_event	9322312	9322827	-	transcript_id "StLNC0115/StLNC0217/StLNC1932,StLNC0056/StLNC0948/StLNC0280/StLNC1823/StLNC1695/StLNC2625/StLNC0637"; gene_id "ST4.03ch07:9316460-9336673C"; flanks "9322827^,9322312-"; structure "0,1-2^"; splice_chain ",9322612-9322452^"; sources "Undefined,Undefined"; NMorMRNA "null"; degree "4"; dimension "2_2";
ST4.03ch07	as_event	9322312	9323522	-	transcript_id "StLNC1389,StLNC1932,StLNC0948/StLNC0280/StLNC1823/StLNC1695/StLNC2625/StLNC0637,StLNC2589/StLNC2615/StLNC1045"; gene_id "ST4.03ch07:9316460-9336673C"; flanks "9323522-,9322312-"; structure "1^3-4^,2^,2^3-4^,4^"; splice_chain "9323315^9322612-9322452^,9322827^,9322827^9322612-9322452^,9322452^"; sources "Undefined,Undefined,Undefined,Undefined"; NMorMRNA "null"; degree "16"; dimensi…
ST4.03ch07	as_event	9322312	9325180	-	transcript_id "StLNC0280,StLNC1389,StLNC1932,StLNC0948/StLNC1823/StLNC2625/StLNC0637,StLNC2589/StLNC2615/StLNC1045,StLNC1695,StLNC2665,StLNC0115/StLNC0217,StLNC0056,StLNC0137/StLNC0765/StLNC0138/StLNC1049/StLNC0670/StLNC0440/StLNC1398/StLNC1237"; gene_id "ST4.03ch07:9316460-9336673C"; flanks "9325180-,9322312-"; structure "1^2-3^5-7^8-9^,3^5-6^8-9^,3^5-7^,3^5-7^8-9^,3^5-9^,4^5-7^8-9^,6^8-9^,7^,7^…
ST4.03ch07	as_event	9322235	9325180	-	transcript_id "StLNC2856/StLNC1465,StLNC0280,StLNC1389,StLNC0948/StLNC1823/StLNC2625/StLNC0637,StLNC2589/StLNC2615/StLNC1045,StLNC1695,StLNC2665,StLNC0056,StLNC0115/StLNC0217,StLNC0137/StLNC0765/StLNC0138/StLNC1049/StLNC0670/StLNC0440/StLNC1398/StLNC1237"; gene_id "ST4.03ch07:9316460-9336673C"; flanks "9325180-,9322235^"; structure "0,1^2-3^5-7^8-9^10-,3^5-6^8-9^10-,3^5-7^8-9^10-,3^5-9^10-,4^5-7^…
ST4.03ch07	as_event	9320641	9321255	-	transcript_id "StLNC0765/StLNC0056/StLNC0217/StLNC0280/StLNC1823/StLNC1389/StLNC2615/StLNC0637,StLNC2665"; gene_id "ST4.03ch07:9316460-9336673C"; flanks "9321255-,9320641-"; structure "1^,2^"; splice_chain "9321192^,9321188^"; sources "Undefined,Undefined"; NMorMRNA "null"; degree "4"; dimension "2_2";
ST4.03ch07	as_event	9320641	9322235	-	transcript_id "StLNC2856/StLNC0138/StLNC2589/StLNC0115/StLNC0948/StLNC1465/StLNC0440/StLNC1237,StLNC0765/StLNC0056/StLNC0217/StLNC0280/StLNC1823/StLNC1389/StLNC2615/StLNC0637,StLNC2665"; gene_id "ST4.03ch07:9316460-9336673C"; flanks "9322235^,9320641-"; structure "0,1-2^,1-3^"; splice_chain ",9321255-9321192^,9321255-9321188^"; sources "Undefined,Undefined,Undefined"; NMorMRNA "null"; degree "9";…
ST4.03ch07	as_event	9320609	9322312	-	transcript_id "StLNC1932,StLNC0137/StLNC1049/StLNC2625/StLNC0670/StLNC1398/StLNC1045"; gene_id "ST4.03ch07:9316460-9336673C"; flanks "9322312-,9320609-"; structure "1^,2^"; splice_chain "9322248^,9322235^"; sources "Undefined,Undefined"; NMorMRNA "null"; degree "4"; dimension "2_2";
ST4.03ch07	as_event	9320546	9321255	-	transcript_id "StLNC1695,StLNC0056/StLNC0217/StLNC0280/StLNC1823/StLNC1389/StLNC2615/StLNC0637,StLNC2665"; gene_id "ST4.03ch07:9316460-9336673C"; flanks "9321255-,9320546^"; structure "0,1^3-,2^3-"; splice_chain ",9321192^9320641-,9321188^9320641-"; sources "Undefined,Undefined,Undefined"; NMorMRNA "null"; degree "9"; dimension "3_3";
ST4.03ch07	as_event	9320546	9322235	-	transcript_id "StLNC1695,StLNC0056/StLNC0217/StLNC0280/StLNC1823/StLNC1389/StLNC2615/StLNC0637,StLNC2665,StLNC2856/StLNC0138/StLNC2589/StLNC0115/StLNC0948/StLNC1465/StLNC0440/StLNC1237,StLNC0137/StLNC1049/StLNC2625/StLNC0670/StLNC1398/StLNC1045"; gene_id "ST4.03ch07:9316460-9336673C"; flanks "9322235^,9320546^"; structure "1-,1-2^4-,1-3^4-,4-,5-"; splice_chain "9321255-,9321255-9321192^9320641-,9…
ST4.03ch07	as_event	9320546	9322312	-	transcript_id "StLNC1932,StLNC1695,StLNC0056/StLNC0217/StLNC0280/StLNC1823/StLNC1389/StLNC2615/StLNC0637,StLNC2665,StLNC0138/StLNC2589/StLNC0115/StLNC0948/StLNC0440/StLNC1237,StLNC0137/StLNC1049/StLNC2625/StLNC0670/StLNC1398/StLNC1045"; gene_id "ST4.03ch07:9316460-9336673C"; flanks "9322312-,9320546^"; structure "1^7-,2^3-,2^3-4^6-,2^3-5^6-,2^6-,2^7-"; splice_chain "9322248^9320609-,9322235^93212…
ST4.03ch07	as_event	9320546	9325180	-	transcript_id "StLNC0280,StLNC1389,StLNC1823/StLNC0637,StLNC0948,StLNC2625,StLNC1932,StLNC2615,StLNC2589,StLNC1045,StLNC1695,StLNC2665,StLNC0056,StLNC0217,StLNC0115,StLNC0138/StLNC0440/StLNC1237,StLNC0137/StLNC1049/StLNC0670/StLNC1398,StLNC2856/StLNC1465"; gene_id "ST4.03ch07:9316460-9336673C"; flanks "9325180-,9320546^"; structure "1^2-3^5-7^8-9^10-12^13-14^16-,3^5-6^8-9^10-12^13-14^16-,3^5-7^8-…
ST4.03ch07	as_event	9318971	9320641	-	transcript_id "StLNC2856/StLNC0138/StLNC2589/StLNC0056/StLNC0115/StLNC0948/StLNC0217/StLNC0280/StLNC1823/StLNC1389/StLNC1465/StLNC2615/StLNC0440/StLNC2665/StLNC1237/StLNC0637,StLNC0765"; gene_id "ST4.03ch07:9316460-9336673C"; flanks "9320641-,9318971-"; structure "1^,2^"; splice_chain "9320546^,9320542^"; sources "Undefined,Undefined"; NMorMRNA "null"; degree "4"; dimension "2_2";
ST4.03ch07	as_event	9318971	9321255	-	transcript_id "StLNC0056/StLNC0217/StLNC0280/StLNC1823/StLNC1389/StLNC2615/StLNC0637,StLNC0765,StLNC2665,StLNC1695"; gene_id "ST4.03ch07:9316460-9336673C"; flanks "9321255-,9318971-"; structure "1^3-4^,1^3-5^,2^3-4^,4^"; splice_chain "9321192^9320641-9320546^,9321192^9320641-9320542^,9321188^9320641-9320546^,9320546^"; sources "Undefined,Undefined,Undefined,Undefined"; NMorMRNA "null"; degree "16…
ST4.03ch07	as_event	9318971	9322235	-	transcript_id "StLNC0056/StLNC0217/StLNC0280/StLNC1823/StLNC1389/StLNC2615/StLNC0637,StLNC0765,StLNC2665,StLNC1695,StLNC2856/StLNC0138/StLNC2589/StLNC0115/StLNC0948/StLNC1465/StLNC0440/StLNC1237,StLNC0137/StLNC1049/StLNC2625/StLNC0670/StLNC1398/StLNC1045"; gene_id "ST4.03ch07:9316460-9336673C"; flanks "9322235^,9318971-"; structure "1-2^4-6^,1-2^4-7^,1-3^4-6^,1-6^,4-6^,5-6^"; splice_chain "932125…
ST4.03ch07	as_event	9318971	9322312	-	transcript_id "StLNC1932,StLNC0056/StLNC0217/StLNC0280/StLNC1823/StLNC1389/StLNC2615/StLNC0637,StLNC0765,StLNC2665,StLNC1695,StLNC0138/StLNC2589/StLNC0115/StLNC0948/StLNC0440/StLNC1237,StLNC0137/StLNC1049/StLNC2625/StLNC0670/StLNC1398/StLNC1045"; gene_id "ST4.03ch07:9316460-9336673C"; flanks "9322312-,9318971-"; structure "1^7-8^,2^3-4^6-8^,2^3-4^6-9^,2^3-5^6-8^,2^3-8^,2^6-8^,2^7-8^"; splice_chai…
ST4.03ch07	as_event	9318971	9325180	-	transcript_id "StLNC0280,StLNC1389,StLNC1823/StLNC0637,StLNC0948,StLNC2625,StLNC1932,StLNC2615,StLNC2589,StLNC1045,StLNC1695,StLNC2665,StLNC0056,StLNC0217,StLNC0115,StLNC0765,StLNC0138/StLNC0440/StLNC1237,StLNC0137/StLNC1049/StLNC0670/StLNC1398,StLNC2856/StLNC1465"; gene_id "ST4.03ch07:9316460-9336673C"; flanks "9325180-,9318971-"; structure "1^2-3^5-7^8-9^10-12^13-14^16-18^,3^5-6^8-9^10-12^13-14…
ST4.03ch07	as_event	9318107	9318851	-	transcript_id "StLNC0637,StLNC0056/StLNC1049/StLNC0670"; gene_id "ST4.03ch07:9316460-9336673C"; flanks "9318851^,9318107^"; structure "1-,2-"; splice_chain "9318755-,9318738-"; sources "Undefined,Undefined"; NMorMRNA "null"; degree "4"; dimension "2_2";
ST4.03ch07	as_event	9318107	9318971	-	transcript_id "StLNC0765/StLNC2856/StLNC0280/StLNC1389/StLNC2625/StLNC2665/StLNC1045/StLNC1237,StLNC0637,StLNC0056/StLNC1049/StLNC0670"; gene_id "ST4.03ch07:9316460-9336673C"; flanks "9318971-,9318107^"; structure "0,1^2-,1^3-"; splice_chain ",9318851^9318755-,9318851^9318738-"; sources "Undefined,Undefined,Undefined"; NMorMRNA "null"; degree "9"; dimension "3_3";
ST4.03ch07	as_event	9317725	9318851	-	transcript_id "StLNC2589/StLNC0115/StLNC0948/StLNC0217/StLNC0440/StLNC1932/StLNC1398,StLNC0637,StLNC0056/StLNC1049/StLNC0670"; gene_id "ST4.03ch07:9316460-9336673C"; flanks "9318851^,9317725-"; structure "0,1-3^,2-3^"; splice_chain ",9318755-9318107^,9318738-9318107^"; sources "Undefined,Undefined,Undefined"; NMorMRNA "null"; degree "9"; dimension "3_3";
ST4.03ch07	as_event	9317725	9318971	-	transcript_id "StLNC2589/StLNC0115/StLNC0948/StLNC0217/StLNC0440/StLNC1932/StLNC1398,StLNC0637,StLNC0056/StLNC1049/StLNC0670,StLNC0765/StLNC2856/StLNC0280/StLNC1389/StLNC2625/StLNC2665/StLNC1237"; gene_id "ST4.03ch07:9316460-9336673C"; flanks "9318971-,9317725-"; structure "1^,1^2-4^,1^3-4^,4^"; splice_chain "9318851^,9318851^9318755-9318107^,9318851^9318738-9318107^,9318107^"; sources "Undefined…
ST4.03ch07	as_event	9317632	9318107	-	transcript_id "StLNC1045,StLNC0765/StLNC2856/StLNC0056/StLNC0280/StLNC1049/StLNC1389/StLNC2625/StLNC0670/StLNC2665/StLNC1237/StLNC0637"; gene_id "ST4.03ch07:9316460-9336673C"; flanks "9318107^,9317632^"; structure "1-,2-"; splice_chain "9317793-,9317725-"; sources "Undefined,Undefined"; NMorMRNA "null"; degree "4"; dimension "2_2";
ST4.03ch07	as_event	9317632	9318738	-	transcript_id "StLNC0138/StLNC1823/StLNC2615,StLNC0056/StLNC1049/StLNC0670"; gene_id "ST4.03ch07:9316460-9336673C"; flanks "9318738-,9317632^"; structure "0,1^2-"; splice_chain ",9318107^9317725-"; sources "Undefined,Undefined"; NMorMRNA "null"; degree "4"; dimension "2_2";
ST4.03ch07	as_event	9317632	9318851	-	transcript_id "StLNC0637,StLNC0138/StLNC1823/StLNC2615,StLNC0056/StLNC1049/StLNC0670,StLNC0137/StLNC1695/StLNC1465,StLNC2589/StLNC0115/StLNC0948/StLNC0217/StLNC0440/StLNC1932/StLNC1398"; gene_id "ST4.03ch07:9316460-9336673C"; flanks "9318851^,9317632^"; structure "1-4^5-,2-,2-4^5-,3-,5-"; splice_chain "9318755-9318107^9317725-,9318738-,9318738-9318107^9317725-,9318194-,9317725-"; sources "Undefin…
ST4.03ch07	as_event	9317632	9318971	-	transcript_id "StLNC0637,StLNC0138/StLNC1823/StLNC2615,StLNC0056/StLNC1049/StLNC0670,StLNC0137/StLNC1695/StLNC1465,StLNC2589/StLNC0115/StLNC0948/StLNC0217/StLNC0440/StLNC1932/StLNC1398,StLNC1045,StLNC0765/StLNC2856/StLNC0280/StLNC1389/StLNC2625/StLNC2665/StLNC1237"; gene_id "ST4.03ch07:9316460-9336673C"; flanks "9318971-,9317632^"; structure "1^2-5^7-,1^3-,1^3-5^7-,1^4-,1^7-,5^6-,5^7-"; splice_ch…
ST4.03ch07	as_event	48537477	48543973	-	transcript_id "StLNC1050,StLNC0972"; gene_id "ST4.03ch07:48537429-48544705C"; flanks "48543973^,48537477-"; structure "0,1-2^"; splice_chain ",48540273-48540214^"; sources "Undefined,Undefined"; NMorMRNA "null"; degree "4"; dimension "2_2";
ST4.03ch08	as_event	9620335	9620874	+	transcript_id "StLNC2151,StLNC2729"; gene_id "ST4.03ch08:9618773-9621690W"; flanks "9620335-,9620874-"; structure "1^,2^"; splice_chain "9620418^,9620527^"; sources "Undefined,Undefined"; NMorMRNA "null"; degree "4"; dimension "2_2";
ST4.03ch08	as_event	9620335	9620897	+	transcript_id "StLNC1438,StLNC2151,StLNC2729"; gene_id "ST4.03ch08:9618773-9621690W"; flanks "9620335-,9620897^"; structure "0,1^3-,2^3-"; splice_chain ",9620418^9620874-,9620527^9620874-"; sources "Undefined,Undefined,Undefined"; NMorMRNA "null"; degree "9"; dimension "3_3";
ST4.03ch08	as_event	10340408	10341059	+	transcript_id "StLNC1910,StLNC1610"; gene_id "ST4.03ch08:10340314-10348698W"; flanks "10340408^,10341059^"; structure "1-,2-"; splice_chain "10340545-,10340840-"; sources "Undefined,Undefined"; NMorMRNA "null"; degree "4"; dimension "2_2";
ST4.03ch08	as_event	10345208	10345457	+	transcript_id "StLNC1610/StLNC1942,StLNC1910"; gene_id "ST4.03ch08:10340314-10348698W"; flanks "10345208^,10345457^"; structure "1-,2-"; splice_chain "10345327-,10345340-"; sources "Undefined,Undefined"; NMorMRNA "null"; degree "4"; dimension "2_2";
ST4.03ch08	as_event	10345148	10345457	+	transcript_id "StLNC0349,StLNC1610/StLNC1942,StLNC1910"; gene_id "ST4.03ch08:10340314-10348698W"; flanks "10345148-,10345457^"; structure "0,1^2-,1^3-"; splice_chain ",10345208^10345327-,10345208^10345340-"; sources "Undefined,Undefined,Undefined"; NMorMRNA "null"; degree "9"; dimension "3_3";
ST4.03ch08	as_event	12730003	12731511	+	transcript_id "StLNC1727,StLNC1507"; gene_id "ST4.03ch08:12720568-12731540W"; flanks "12730003-,12731511-"; structure "1^,2^"; splice_chain "12730273^,12731267^"; sources "Undefined,Undefined"; NMorMRNA "null"; degree "4"; dimension "2_2";
ST4.03ch08	as_event	28233973	28235627	+	transcript_id "StLNC2426,StLNC2000"; gene_id "ST4.03ch08:28233454-28236093W"; flanks "28233973^,28235627^"; structure "1-,2-"; splice_chain "28235337-,28235445-"; sources "Undefined,Undefined"; NMorMRNA "null"; degree "4"; dimension "2_2";
ST4.03ch08	as_event	28235627	28236090	+	transcript_id "StLNC0968,StLNC1515"; gene_id "ST4.03ch08:28233454-28236093W"; flanks "28235627^,28236090]"; structure "1-,2-"; splice_chain "28235764-,28235782-"; sources "Undefined,Undefined"; NMorMRNA "null"; degree "4"; dimension "2_2";
ST4.03ch08	as_event	33562216	33577808	+	transcript_id "StLNC1479,StLNC2374"; gene_id "ST4.03ch08:33561601-33597232W"; flanks "33562216^,33577808^"; structure "1-,2-"; splice_chain "33577738-,33577745-"; sources "Undefined,Undefined"; NMorMRNA "null"; degree "4"; dimension "2_2";
ST4.03ch08	as_event	34328722	34328995	+	transcript_id "StLNC0877,StLNC2228"; gene_id "ST4.03ch08:34327035-34329962W"; flanks "34328722-,34328995^"; structure "0,1^2-"; splice_chain ",34328808^34328903-"; sources "Undefined,Undefined"; NMorMRNA "null"; degree "4"; dimension "2_2";
ST4.03ch08	as_event	34328808	34329312	+	transcript_id "StLNC0469,StLNC2228"; gene_id "ST4.03ch08:34327035-34329962W"; flanks "34328808^,34329312-"; structure "0,1-2^"; splice_chain ",34328903-34328995^"; sources "Undefined,Undefined"; NMorMRNA "null"; degree "4"; dimension "2_2";
ST4.03ch08	as_event	34328722	34329312	+	transcript_id "StLNC0469,StLNC2228,StLNC0877"; gene_id "ST4.03ch08:34327035-34329962W"; flanks "34328722-,34329312-"; structure "1^,1^2-3^,3^"; splice_chain "34328808^,34328808^34328903-34328995^,34328995^"; sources "Undefined,Undefined,Undefined"; NMorMRNA "null"; degree "9"; dimension "3_3";
ST4.03ch08	as_event	34328722	34329962	+	transcript_id "StLNC2735,StLNC0877"; gene_id "ST4.03ch08:34327035-34329962W"; flanks "34328722-,34329962]"; structure "0,1^2-"; splice_chain ",34328995^34329312-"; sources "Undefined,Undefined"; NMorMRNA "null"; degree "4"; dimension "2_2";
ST4.03ch08	as_event	41557013	41557175	+	transcript_id "StLNC1639/StLNC0110,StLNC0690"; gene_id "ST4.03ch08:41556751-41574317W"; flanks "41557013^,41557175^"; structure "1-,2-"; splice_chain "41557089-,41557103-"; sources "Undefined,Undefined"; NMorMRNA "null"; degree "4"; dimension "2_2";
ST4.03ch08	as_event	48973442	48976247	+	transcript_id "StLNC2239,StLNC0058"; gene_id "ST4.03ch08:48972098-48978218W"; flanks "48973442^,48976247-"; structure "0,1-2^"; splice_chain ",48974709-48975481^"; sources "Undefined,Undefined"; NMorMRNA "null"; degree "4"; dimension "2_2";
ST4.03ch08	as_event	48976331	48976828	+	transcript_id "StLNC0220/StLNC0058/StLNC1621/StLNC2239,StLNC2098"; gene_id "ST4.03ch08:48972098-48978218W"; flanks "48976331^,48976828^"; structure "1-,2-"; splice_chain "48976772-,48976775-"; sources "Undefined,Undefined"; NMorMRNA "null"; degree "4"; dimension "2_2";
ST4.03ch08	as_event	50135131	50135650	+	transcript_id "StLNC0474,StLNC0841"; gene_id "ST4.03ch08:50133814-50145579W"; flanks "50135131^,50135650^"; structure "1-,2-"; splice_chain "50135517-,50135520-"; sources "Undefined,Undefined"; NMorMRNA "null"; degree "4"; dimension "2_2";
ST4.03ch08	as_event	51955730	51963612	+	transcript_id "StLNC0205,StLNC1159"; gene_id "ST4.03ch08:51955346-51963658W"; flanks "51955730^,51963612]"; structure "1-5^6-,2-3^4-"; splice_chain "51961746-51963498^51963590-,51962242-51962346^51962901-"; sources "Undefined,Undefined"; NMorMRNA "null"; degree "4"; dimension "2_2";
ST4.03ch08	as_event	55951779	55953237	+	transcript_id "StLNC2740,StLNC2260"; gene_id "ST4.03ch08:55951744-55959464W"; flanks "55951779[,55953237^"; structure "0,1^2-"; splice_chain ",55953050^55953163-"; sources "Undefined,Undefined"; NMorMRNA "null"; degree "4"; dimension "2_2";
ST4.03ch08	as_event	55953163	55954104	+	transcript_id "StLNC2260,StLNC1041"; gene_id "ST4.03ch08:55951744-55959464W"; flanks "55953163-,55954104-"; structure "1^,2^"; splice_chain "55953237^,55953278^"; sources "Undefined,Undefined"; NMorMRNA "null"; degree "4"; dimension "2_2";
ST4.03ch08	as_event	55953050	55954104	+	transcript_id "StLNC0788/StLNC2393,StLNC2260,StLNC1041"; gene_id "ST4.03ch08:55951744-55959464W"; flanks "55953050^,55954104-"; structure "0,1-2^,1-3^"; splice_chain ",55953163-55953237^,55953163-55953278^"; sources "Undefined,Undefined,Undefined"; NMorMRNA "null"; degree "9"; dimension "3_3";
ST4.03ch08	as_event	55953050	55954328	+	transcript_id "StLNC2260,StLNC1041,StLNC0788/StLNC2393,StLNC1775"; gene_id "ST4.03ch08:55951744-55959464W"; flanks "55953050^,55954328^"; structure "1-2^4-,1-3^4-,4-,5-"; splice_chain "55953163-55953237^55954104-,55953163-55953278^55954104-,55954104-,55954173-"; sources "Undefined,Undefined,Undefined,Undefined"; NMorMRNA "null"; degree "16"; dimension "4_4";
ST4.03ch08	as_event	55952117	55954328	+	transcript_id "StLNC2393,StLNC1679"; gene_id "ST4.03ch08:55951744-55959464W"; flanks "55952117^,55954328^"; structure "1-2^3-,4-"; splice_chain "55952380-55953050^55954104-,55954173-"; sources "Undefined,Undefined"; NMorMRNA "null"; degree "4"; dimension "2_2";
ST4.03ch08	as_event	33328882	33329241	-	transcript_id "StLNC1230,StLNC1670"; gene_id "ST4.03ch08:33328650-33329241C"; flanks "33329241[,33328882-"; structure "1^,2^"; splice_chain "33329149^,33328983^"; sources "Undefined,Undefined"; NMorMRNA "null"; degree "4"; dimension "2_2";
ST4.03ch09	as_event	1811681	1816000	+	transcript_id "StLNC0027,StLNC1911"; gene_id "ST4.03ch09:1811145-1816000W"; flanks "1811681^,1816000]"; structure "1-,2-"; splice_chain "1814817-,1814865-"; sources "Undefined,Undefined"; NMorMRNA "null"; degree "4"; dimension "2_2";
ST4.03ch09	as_event	25215003	25216190	+	transcript_id "StLNC0380,StLNC0304"; gene_id "ST4.03ch09:25212828-25217499W"; flanks "25215003-,25216190^"; structure "1^4-,2^3-"; splice_chain "25215072^25215941-,25215303^25215938-"; sources "Undefined,Undefined"; NMorMRNA "null"; degree "4"; dimension "2_2";
ST4.03ch09	as_event	34782465	34783472	+	transcript_id "StLNC1903,StLNC0258"; gene_id "ST4.03ch09:34782465-34790812W"; flanks "34782465[,34783472-"; structure "1^,2^"; splice_chain "34782650^,34782728^"; sources "Undefined,Undefined"; NMorMRNA "null"; degree "4"; dimension "2_2";
ST4.03ch09	as_event	43909688	43941754	+	transcript_id "StLNC1561,StLNC2406"; gene_id "ST4.03ch09:43907203-43942416W"; flanks "43909688^,43941754-"; structure "0,1-2^"; splice_chain ",43925349-43925415^"; sources "Undefined,Undefined"; NMorMRNA "null"; degree "4"; dimension "2_2";
ST4.03ch09	as_event	45315979	45316296	+	transcript_id "StLNC1368,StLNC0625"; gene_id "ST4.03ch09:45315940-45316802W"; flanks "45315979[,45316296^"; structure "0,1^2-"; splice_chain ",45316152^45316223-"; sources "Undefined,Undefined"; NMorMRNA "null"; degree "4"; dimension "2_2";
ST4.03ch09	as_event	45315940	45316296	+	transcript_id "StLNC2721,StLNC1584"; gene_id "ST4.03ch09:45315940-45316802W"; flanks "45315940[,45316296^"; structure "0,1^2-"; splice_chain ",45316152^45316223-"; sources "Undefined,Undefined"; NMorMRNA "null"; degree "4"; dimension "2_2";
ST4.03ch09	as_event	45316296	45316785	+	transcript_id "StLNC1584,StLNC2721"; gene_id "ST4.03ch09:45315940-45316802W"; flanks "45316296^,45316785]"; structure "1-,2-"; splice_chain "45316371-,45316377-"; sources "Undefined,Undefined"; NMorMRNA "null"; degree "4"; dimension "2_2";
ST4.03ch09	as_event	48921756	48921954	+	transcript_id "StLNC2675,StLNC2048"; gene_id "ST4.03ch09:48921279-48924876W"; flanks "48921756^,48921954^"; structure "1-,2-"; splice_chain "48921819-,48921838-"; sources "Undefined,Undefined"; NMorMRNA "null"; degree "4"; dimension "2_2";
ST4.03ch09	as_event	48922168	48924675	+	transcript_id "StLNC2032,StLNC2675"; gene_id "ST4.03ch09:48921279-48924876W"; flanks "48922168^,48924675-"; structure "0,1-2^"; splice_chain ",48923934-48924015^"; sources "Undefined,Undefined"; NMorMRNA "null"; degree "4"; dimension "2_2";
ST4.03ch09	as_event	51859773	51860684	+	transcript_id "StLNC1405,StLNC1746"; gene_id "ST4.03ch09:51858246-51860684W"; flanks "51859773^,51860684]"; structure "1-,2-"; splice_chain "51859846-,51859918-"; sources "Undefined,Undefined"; NMorMRNA "null"; degree "4"; dimension "2_2";
ST4.03ch09	as_event	61318372	61318582	+	transcript_id "StLNC1705,StLNC0692"; gene_id "ST4.03ch09:61318282-61324023W"; flanks "61318372[,61318582^"; structure "0,1^2-"; splice_chain ",61318423^61318523-"; sources "Undefined,Undefined"; NMorMRNA "null"; degree "4"; dimension "2_2";
ST4.03ch09	as_event	61318372	61318762	+	transcript_id "StLNC0692,StLNC2067,StLNC1705"; gene_id "ST4.03ch09:61318282-61324023W"; flanks "61318372[,61318762-"; structure "1^2-4^,3^,4^"; splice_chain "61318423^61318523-61318582^,61318534^,61318582^"; sources "Undefined,Undefined,Undefined"; NMorMRNA "null"; degree "9"; dimension "3_3";
ST4.03ch09	as_event	61318372	61318860	+	transcript_id "StLNC1030,StLNC2067"; gene_id "ST4.03ch09:61318282-61324023W"; flanks "61318372[,61318860^"; structure "1^3-4^6-,2^5-"; splice_chain "61318513^61318565-61318660^61318840-,61318534^61318762-"; sources "Undefined,Undefined"; NMorMRNA "null"; degree "4"; dimension "2_2";
ST4.03ch09	as_event	61318372	61319278	+	transcript_id "StLNC0692,StLNC0414/StLNC1387"; gene_id "ST4.03ch09:61318282-61324023W"; flanks "61318372[,61319278-"; structure "1^3-5^7-8^,2^4-6^"; splice_chain "61318423^61318523-61318582^61318762-61318815^,61318513^61318565-61318665^"; sources "Undefined,Undefined"; NMorMRNA "null"; degree "4"; dimension "2_2";
ST4.03ch09	as_event	61318372	61319590	+	transcript_id "StLNC0692,StLNC2766,StLNC1387"; gene_id "ST4.03ch09:61318282-61324023W"; flanks "61318372[,61319590-"; structure "1^4-6^8-9^10-11^,2^,3^5-7^10-11^"; splice_chain "61318423^61318523-61318582^61318762-61318815^61319278-61319331^,61318480^,61318513^61318565-61318665^61319278-61319331^"; sources "Undefined,Undefined,Undefined"; NMorMRNA "null"; degree "9"; dimension "3_3";
ST4.03ch09	as_event	61319512	61319661	+	transcript_id "StLNC0602/StLNC1693/StLNC2412,StLNC1217/StLNC2385/StLNC2209/StLNC0172/StLNC1200/StLNC1233/StLNC0376/StLNC2023/StLNC0473"; gene_id "ST4.03ch09:61318282-61324023W"; flanks "61319512-,61319661^"; structure "1^4-,2^3-"; splice_chain "61319562^61319635-,61319589^61319626-"; sources "Undefined,Undefined"; NMorMRNA "null"; degree "4"; dimension "2_2";
ST4.03ch09	as_event	61318372	61319661	+	transcript_id "StLNC2385/StLNC2209/StLNC1200/StLNC1233/StLNC0376/StLNC2023/StLNC0473,StLNC0692,StLNC1387"; gene_id "ST4.03ch09:61318282-61324023W"; flanks "61318372[,61319661^"; structure "1^12-13^15-,2^4-6^8-9^10-11^14-,3^5-7^10-11^14-"; splice_chain "61318420^61319512-61319589^61319626-,61318423^61318523-61318582^61318762-61318815^61319278-61319331^61319590-,61318513^61318565-61318665^61319278-…
ST4.03ch09	as_event	61319589	61319706	+	transcript_id "StLNC1420/StLNC2578/StLNC0226,StLNC2108"; gene_id "ST4.03ch09:61318282-61324023W"; flanks "61319589^,61319706^"; structure "1-,2-"; splice_chain "61319626-,61319662-"; sources "Undefined,Undefined"; NMorMRNA "null"; degree "4"; dimension "2_2";
ST4.03ch09	as_event	61319512	61319706	+	transcript_id "StLNC0461/StLNC2295,StLNC1420/StLNC2578/StLNC0226,StLNC2108"; gene_id "ST4.03ch09:61318282-61324023W"; flanks "61319512-,61319706^"; structure "1^4-,2^3-,2^5-"; splice_chain "61319562^61319635-,61319589^61319626-,61319589^61319662-"; sources "Undefined,Undefined,Undefined"; NMorMRNA "null"; degree "9"; dimension "3_3";
ST4.03ch09	as_event	61319512	61319733	+	transcript_id "StLNC1062,StLNC2054/StLNC2570"; gene_id "ST4.03ch09:61318282-61324023W"; flanks "61319512-,61319733^"; structure "1^4-,2^3-"; splice_chain "61319562^61319635-,61319589^61319626-"; sources "Undefined,Undefined"; NMorMRNA "null"; degree "4"; dimension "2_2";
ST4.03ch09	as_event	61319626	61319806	+	transcript_id "StLNC2209/StLNC1163,StLNC2570"; gene_id "ST4.03ch09:61318282-61324023W"; flanks "61319626-,61319806-"; structure "1^,2^"; splice_chain "61319661^,61319733^"; sources "Undefined,Undefined"; NMorMRNA "null"; degree "4"; dimension "2_2";
ST4.03ch09	as_event	61319590	61319806	+	transcript_id "StLNC2766/StLNC2091,StLNC1387/StLNC0692"; gene_id "ST4.03ch09:61318282-61324023W"; flanks "61319590-,61319806-"; structure "1^,2^"; splice_chain "61319625^,61319661^"; sources "Undefined,Undefined"; NMorMRNA "null"; degree "4"; dimension "2_2";
ST4.03ch09	as_event	61319589	61319806	+	transcript_id "StLNC1837/StLNC1367/StLNC1934/StLNC2816/StLNC1168,StLNC2209/StLNC1163,StLNC2570"; gene_id "ST4.03ch09:61318282-61324023W"; flanks "61319589^,61319806-"; structure "0,1-2^,1-3^"; splice_chain ",61319626-61319661^,61319626-61319733^"; sources "Undefined,Undefined,Undefined"; NMorMRNA "null"; degree "9"; dimension "3_3";
ST4.03ch09	as_event	61319512	61319806	+	transcript_id "StLNC2412,StLNC1837/StLNC1367/StLNC1934/StLNC2816,StLNC2209,StLNC2570"; gene_id "ST4.03ch09:61318282-61324023W"; flanks "61319512-,61319806-"; structure "1^4-5^,2^,2^3-5^,2^3-6^"; splice_chain "61319562^61319635-61319661^,61319589^,61319589^61319626-61319661^,61319589^61319626-61319733^"; sources "Undefined,Undefined,Undefined,Undefined"; NMorMRNA "null"; degree "16"; dimension "4_…
ST4.03ch09	as_event	61319133	61319806	+	transcript_id "StLNC1168,StLNC2091"; gene_id "ST4.03ch09:61318282-61324023W"; flanks "61319133[,61319806-"; structure "1^3-4^,2^5-6^"; splice_chain "61319181^61319470-61319589^,61319331^61319590-61319625^"; sources "Undefined,Undefined"; NMorMRNA "null"; degree "4"; dimension "2_2";
ST4.03ch09	as_event	61318372	61319806	+	transcript_id "StLNC1837/StLNC1367/StLNC1934/StLNC2816,StLNC2209,StLNC0692,StLNC2766,StLNC1387"; gene_id "ST4.03ch09:61318282-61324023W"; flanks "61318372[,61319806-"; structure "1^13-14^,1^13-14^17-18^,2^5-7^9-10^11-12^15-18^,3^15-16^,4^6-8^11-12^15-18^"; splice_chain "61318420^61319512-61319589^,61318420^61319512-61319589^61319626-61319661^,61318423^61318523-61318582^61318762-61318815^61319278-…
ST4.03ch09	as_event	61319661	61319817	+	transcript_id "StLNC2385/StLNC1200/StLNC1233/StLNC0602,StLNC1387/StLNC0692/StLNC1163"; gene_id "ST4.03ch09:61318282-61324023W"; flanks "61319661^,61319817^"; structure "1-,2-"; splice_chain "61319734-,61319806-"; sources "Undefined,Undefined"; NMorMRNA "null"; degree "4"; dimension "2_2";
ST4.03ch09	as_event	61319635	61319817	+	transcript_id "StLNC0602,StLNC0461/StLNC2295"; gene_id "ST4.03ch09:61318282-61324023W"; flanks "61319635-,61319817^"; structure "1^3-,2^4-"; splice_chain "61319661^61319734-,61319706^61319779-"; sources "Undefined,Undefined"; NMorMRNA "null"; degree "4"; dimension "2_2";
ST4.03ch09	as_event	61319626	61319817	+	transcript_id "StLNC2385/StLNC1200/StLNC1233,StLNC1163,StLNC1420/StLNC2578/StLNC0226,StLNC2570"; gene_id "ST4.03ch09:61318282-61324023W"; flanks "61319626-,61319817^"; structure "1^4-,1^6-,2^5-,3^6-"; splice_chain "61319661^61319734-,61319661^61319806-,61319706^61319779-,61319733^61319806-"; sources "Undefined,Undefined,Undefined,Undefined"; NMorMRNA "null"; degree "16"; dimension "4_4";
ST4.03ch09	as_event	61319589	61319817	+	transcript_id "StLNC2385/StLNC1200/StLNC1233,StLNC1163,StLNC1420/StLNC2578/StLNC0226,StLNC2570,StLNC2108,StLNC1837/StLNC1934/StLNC2816/StLNC1168"; gene_id "ST4.03ch09:61318282-61324023W"; flanks "61319589^,61319817^"; structure "1-2^6-,1-2^8-,1-4^7-,1-5^8-,3-4^7-,8-"; splice_chain "61319626-61319661^61319734-,61319626-61319661^61319806-,61319626-61319706^61319779-,61319626-61319733^61319806-,6131…
ST4.03ch09	as_event	61319512	61319817	+	transcript_id "StLNC0602,StLNC0461/StLNC2295,StLNC2385/StLNC1200/StLNC1233,StLNC1420/StLNC2578/StLNC0226,StLNC2570,StLNC2108,StLNC1837/StLNC1934/StLNC2816"; gene_id "ST4.03ch09:61318282-61324023W"; flanks "61319512-,61319817^"; structure "1^4-5^9-,1^4-7^10-,2^3-5^9-,2^3-7^10-,2^3-8^11-,2^6-7^10-,2^11-"; splice_chain "61319562^61319635-61319661^61319734-,61319562^61319635-61319706^61319779-,613195…
ST4.03ch09	as_event	61318372	61319817	+	transcript_id "StLNC2385/StLNC1200/StLNC1233,StLNC2578/StLNC0226,StLNC2108,StLNC1837/StLNC1934/StLNC2816,StLNC0692,StLNC1387"; gene_id "ST4.03ch09:61318282-61324023W"; flanks "61318372[,61319817^"; structure "1^12-13^15-16^19-,1^12-13^15-18^20-,1^12-13^17-18^20-,1^12-13^21-,2^4-6^8-9^10-11^14-16^21-,3^5-7^10-11^14-16^21-"; splice_chain "61318420^61319512-61319589^61319626-61319661^61319734-,61318…
ST4.03ch09	as_event	61319806	61319962	+	transcript_id "StLNC1387/StLNC1837/StLNC0692/StLNC1934/StLNC2816/StLNC1163/StLNC1168,StLNC2766/StLNC1367/StLNC2091"; gene_id "ST4.03ch09:61318282-61324023W"; flanks "61319806-,61319962-"; structure "1^,2^"; splice_chain "61319817^,61319889^"; sources "Undefined,Undefined"; NMorMRNA "null"; degree "4"; dimension "2_2";
ST4.03ch09	as_event	61319626	61319962	+	transcript_id "StLNC2385/StLNC1200/StLNC1233,StLNC1163,StLNC1420/StLNC2578/StLNC0226,StLNC1053/StLNC0406/StLNC0958"; gene_id "ST4.03ch09:61318282-61324023W"; flanks "61319626-,61319962-"; structure "1^3-7^,1^6-7^,2^5-7^,4^"; splice_chain "61319661^61319734-61319817^,61319661^61319806-61319817^,61319706^61319779-61319817^,61319745^"; sources "Undefined,Undefined,Undefined,Undefined"; NMorMRNA "nul…
ST4.03ch09	as_event	61319590	61319962	+	transcript_id "StLNC2766/StLNC2091,StLNC1387/StLNC0692,StLNC1881"; gene_id "ST4.03ch09:61318282-61324023W"; flanks "61319590-,61319962-"; structure "1^4-6^,2^4-5^,3^"; splice_chain "61319625^61319806-61319889^,61319661^61319806-61319817^,61319745^"; sources "Undefined,Undefined,Undefined"; NMorMRNA "null"; degree "9"; dimension "3_3";
ST4.03ch09	as_event	61319589	61319962	+	transcript_id "StLNC2385/StLNC1200/StLNC1233,StLNC1163,StLNC1420/StLNC2578/StLNC0226,StLNC1053/StLNC0406/StLNC0958,StLNC2108,StLNC1837/StLNC1934/StLNC2816/StLNC1168,StLNC1367"; gene_id "ST4.03ch09:61318282-61324023W"; flanks "61319589^,61319962-"; structure "1-2^5-9^,1-2^8-9^,1-4^7-9^,1-6^,3-4^7-9^,8-9^,8-10^"; splice_chain "61319626-61319661^61319734-61319817^,61319626-61319661^61319806-61319817…
ST4.03ch09	as_event	61319512	61319962	+	transcript_id "StLNC0602,StLNC0461/StLNC2295,StLNC2385/StLNC1200/StLNC1233,StLNC1420/StLNC2578/StLNC0226,StLNC1053/StLNC0406/StLNC0958,StLNC2108,StLNC1837/StLNC1934/StLNC2816,StLNC1367"; gene_id "ST4.03ch09:61318282-61324023W"; flanks "61319512-,61319962-"; structure "1^4-5^8-12^,1^4-7^10-12^,2^3-5^8-12^,2^3-7^10-12^,2^3-9^,2^6-7^10-12^,2^11-12^,2^11-13^"; splice_chain "61319562^61319635-61319661…
ST4.03ch09	as_event	61318372	61319962	+	transcript_id "StLNC2385/StLNC1200/StLNC1233,StLNC2578/StLNC0226,StLNC0406/StLNC0958,StLNC2108,StLNC1837/StLNC1934/StLNC2816,StLNC1367,StLNC0692,StLNC2766,StLNC1387"; gene_id "ST4.03ch09:61318282-61324023W"; flanks "61318372[,61319962-"; structure "1^13-14^17-18^21-25^,1^13-14^17-20^23-25^,1^13-14^17-22^,1^13-14^19-20^23-25^,1^13-14^24-25^,1^13-14^24-26^,2^5-7^9-10^11-12^15-18^24-25^,3^15-16^24-2…
ST4.03ch09	as_event	61319806	61319994	+	transcript_id "StLNC1387/StLNC0692/StLNC1934/StLNC2816/StLNC1163,StLNC2412"; gene_id "ST4.03ch09:61318282-61324023W"; flanks "61319806-,61319994^"; structure "1^4-,2^3-"; splice_chain "61319817^61319962-,61319841^61319950-"; sources "Undefined,Undefined"; NMorMRNA "null"; degree "4"; dimension "2_2";
ST4.03ch09	as_event	61319661	61319994	+	transcript_id "StLNC2385/StLNC1200/StLNC0602,StLNC1387/StLNC0692/StLNC1163,StLNC2412"; gene_id "ST4.03ch09:61318282-61324023W"; flanks "61319661^,61319994^"; structure "1-3^6-,2-3^6-,2-4^5-"; splice_chain "61319734-61319817^61319962-,61319806-61319817^61319962-,61319806-61319841^61319950-"; sources "Undefined,Undefined,Undefined"; NMorMRNA "null"; degree "9"; dimension "3_3";
ST4.03ch09	as_event	61319635	61319994	+	transcript_id "StLNC0602,StLNC2412,StLNC0461/StLNC2295"; gene_id "ST4.03ch09:61318282-61324023W"; flanks "61319635-,61319994^"; structure "1^3-6^9-,1^5-7^8-,2^4-6^9-"; splice_chain "61319661^61319734-61319817^61319962-,61319661^61319806-61319841^61319950-,61319706^61319779-61319817^61319962-"; sources "Undefined,Undefined,Undefined"; NMorMRNA "null"; degree "9"; dimension "3_3";
ST4.03ch09	as_event	61319512	61319994	+	transcript_id "StLNC0602,StLNC2412,StLNC0461/StLNC2295,StLNC2385/StLNC1200,StLNC1420,StLNC0406/StLNC0958,StLNC2108,StLNC1934/StLNC2816"; gene_id "ST4.03ch09:61318282-61324023W"; flanks "61319512-,61319994^"; structure "1^4-5^8-12^15-,1^4-5^11-13^14-,1^4-7^10-12^15-,2^3-5^8-12^15-,2^3-7^10-12^15-,2^3-9^15-,2^6-7^10-12^15-,2^11-12^15-"; splice_chain "61319562^61319635-61319661^61319734-61319817^613…
ST4.03ch09	as_event	61318372	61319994	+	transcript_id "StLNC2385/StLNC1200,StLNC0406/StLNC0958,StLNC2108,StLNC1934/StLNC2816,StLNC0692,StLNC1475,StLNC1387"; gene_id "ST4.03ch09:61318282-61324023W"; flanks "61318372[,61319994^"; structure "1^13-14^16-17^20-24^26-,1^13-14^16-21^26-,1^13-14^18-19^22-24^26-,1^13-14^23-24^26-,2^5-7^9-10^11-12^15-17^23-24^26-,3^25-,4^6-8^11-12^15-17^23-24^26-"; splice_chain "61318420^61319512-61319589^613196…
ST4.03ch09	as_event	61319625	61320009	+	transcript_id "StLNC2766,StLNC1575"; gene_id "ST4.03ch09:61318282-61324023W"; flanks "61319625^,61320009]"; structure "1-3^4-,2-"; splice_chain "61319806-61319889^61319962-,61319878-"; sources "Undefined,Undefined"; NMorMRNA "null"; degree "4"; dimension "2_2";
ST4.03ch09	as_event	61319590	61320009	+	transcript_id "StLNC2766,StLNC1575,StLNC1881"; gene_id "ST4.03ch09:61318282-61324023W"; flanks "61319590-,61320009]"; structure "1^3-5^6-,1^4-,2^6-"; splice_chain "61319625^61319806-61319889^61319962-,61319625^61319878-,61319745^61319962-"; sources "Undefined,Undefined,Undefined"; NMorMRNA "null"; degree "9"; dimension "3_3";
ST4.03ch09	as_event	61319962	61320067	+	transcript_id "StLNC1420/StLNC0461/StLNC2385/StLNC2108/StLNC1387/StLNC0602/StLNC2816/StLNC0958/StLNC1163,StLNC1233/StLNC1053/StLNC1837/StLNC2578"; gene_id "ST4.03ch09:61318282-61324023W"; flanks "61319962-,61320067-"; structure "1^,2^"; splice_chain "61319994^,61320030^"; sources "Undefined,Undefined"; NMorMRNA "null"; degree "4"; dimension "2_2";
ST4.03ch09	as_event	61319734	61320067	+	transcript_id "StLNC0172,StLNC2385/StLNC0602,StLNC1233"; gene_id "ST4.03ch09:61318282-61324023W"; flanks "61319734-,61320067-"; structure "1^3-4^,2^5-6^,2^5-7^"; splice_chain "61319805^61319878-61319922^,61319817^61319962-61319994^,61319817^61319962-61320030^"; sources "Undefined,Undefined,Undefined"; NMorMRNA "null"; degree "9"; dimension "3_3";
ST4.03ch09	as_event	61319661	61320067	+	transcript_id "StLNC0172,StLNC2385/StLNC0602,StLNC1233,StLNC1387/StLNC1163"; gene_id "ST4.03ch09:61318282-61324023W"; flanks "61319661^,61320067-"; structure "1-2^5-6^,1-4^7-8^,1-4^7-9^,3-4^7-8^"; splice_chain "61319734-61319805^61319878-61319922^,61319734-61319817^61319962-61319994^,61319734-61319817^61319962-61320030^,61319806-61319817^61319962-61319994^"; sources "Undefined,Undefined,Undefined…
ST4.03ch09	as_event	61319626	61320067	+	transcript_id "StLNC0172,StLNC2385,StLNC1233,StLNC1163,StLNC1420,StLNC2578,StLNC0958,StLNC1053"; gene_id "ST4.03ch09:61318282-61324023W"; flanks "61319626-,61320067-"; structure "1^3-6^9-10^,1^3-8^11-12^,1^3-8^11-13^,1^7-8^11-12^,2^5-8^11-12^,2^5-8^11-13^,4^11-12^,4^11-13^"; splice_chain "61319661^61319734-61319805^61319878-61319922^,61319661^61319734-61319817^61319962-61319994^,61319661^61319734…
ST4.03ch09	as_event	61319589	61320067	+	transcript_id "StLNC0172,StLNC2385,StLNC1233,StLNC1163,StLNC1420,StLNC2578,StLNC0958,StLNC1053,StLNC2108,StLNC2816,StLNC1837"; gene_id "ST4.03ch09:61318282-61324023W"; flanks "61319589^,61320067-"; structure "1-2^5-8^11-12^,1-2^5-10^13-14^,1-2^5-10^13-15^,1-2^9-10^13-14^,1-4^7-10^13-14^,1-4^7-10^13-15^,1-6^13-14^,1-6^13-15^,3-4^7-10^13-14^,9-10^13-14^,9-10^13-15^"; splice_chain "61319626-61319661…
ST4.03ch09	as_event	61319512	61320067	+	transcript_id "StLNC0602,StLNC0461,StLNC0172,StLNC2385,StLNC1233,StLNC1420,StLNC2578,StLNC0958,StLNC1053,StLNC2108,StLNC2816,StLNC1837"; gene_id "ST4.03ch09:61318282-61324023W"; flanks "61319512-,61320067-"; structure "1^4-5^8-13^16-17^,1^4-7^10-13^16-17^,2^3-5^8-11^14-15^,2^3-5^8-13^16-17^,2^3-5^8-13^16-18^,2^3-7^10-13^16-17^,2^3-7^10-13^16-18^,2^3-9^16-17^,2^3-9^16-18^,2^6-7^10-13^16-17^,2^12-1…
ST4.03ch09	as_event	61318372	61320067	+	transcript_id "StLNC2385,StLNC1233,StLNC2578,StLNC0958,StLNC2108,StLNC2816,StLNC1837,StLNC1475,StLNC1387"; gene_id "ST4.03ch09:61318282-61324023W"; flanks "61318372[,61320067-"; structure "1^8-9^11-12^15-19^21-22^,1^8-9^11-12^15-19^21-23^,1^8-9^11-14^17-19^21-23^,1^8-9^11-16^21-22^,1^8-9^13-14^17-19^21-22^,1^8-9^18-19^21-22^,1^8-9^18-19^21-23^,2^20-22^,3^4-5^6-7^10-12^18-19^21-22^"; splice_chain …
ST4.03ch09	as_event	61319994	61320115	+	transcript_id "StLNC0692/StLNC1934,StLNC1163"; gene_id "ST4.03ch09:61318282-61324023W"; flanks "61319994^,61320115]"; structure "1-,2-"; splice_chain "61320031-,61320067-"; sources "Undefined,Undefined"; NMorMRNA "null"; degree "4"; dimension "2_2";
ST4.03ch09	as_event	61319994	61320129	+	transcript_id "StLNC2295,StLNC0461/StLNC0602"; gene_id "ST4.03ch09:61318282-61324023W"; flanks "61319994^,61320129^"; structure "1-,2-"; splice_chain "61320031-,61320067-"; sources "Undefined,Undefined"; NMorMRNA "null"; degree "4"; dimension "2_2";
ST4.03ch09	as_event	61319994	61320154	+	transcript_id "StLNC1200/StLNC0406,StLNC1420/StLNC2385/StLNC1475/StLNC2108/StLNC1387/StLNC0958"; gene_id "ST4.03ch09:61318282-61324023W"; flanks "61319994^,61320154]"; structure "1-3^4-,2-"; splice_chain "61320031-61320069^61320106-,61320067-"; sources "Undefined,Undefined"; NMorMRNA "null"; degree "4"; dimension "2_2";
ST4.03ch09	as_event	61319962	61320154	+	transcript_id "StLNC1200/StLNC0406,StLNC1420/StLNC2385/StLNC2108/StLNC1387/StLNC0958,StLNC1053/StLNC2578"; gene_id "ST4.03ch09:61318282-61324023W"; flanks "61319962-,61320154]"; structure "1^3-5^6-,1^4-,2^4-"; splice_chain "61319994^61320031-61320069^61320106-,61319994^61320067-,61320030^61320067-"; sources "Undefined,Undefined,Undefined"; NMorMRNA "null"; degree "9"; dimension "3_3";
ST4.03ch09	as_event	61319734	61320154	+	transcript_id "StLNC0172,StLNC1200,StLNC2385"; gene_id "ST4.03ch09:61318282-61324023W"; flanks "61319734-,61320154]"; structure "1^3-4^8-,2^5-6^7-9^10-,2^5-6^8-"; splice_chain "61319805^61319878-61319922^61320067-,61319817^61319962-61319994^61320031-61320069^61320106-,61319817^61319962-61319994^61320067-"; sources "Undefined,Undefined,Undefined"; NMorMRNA "null"; degree "9"; dimension "3_3";
ST4.03ch09	as_event	61319661	61320154	+	transcript_id "StLNC0172,StLNC1200,StLNC2385,StLNC1387"; gene_id "ST4.03ch09:61318282-61324023W"; flanks "61319661^,61320154]"; structure "1-2^5-6^10-,1-4^7-8^9-11^12-,1-4^7-8^10-,3-4^7-8^10-"; splice_chain "61319734-61319805^61319878-61319922^61320067-,61319734-61319817^61319962-61319994^61320031-61320069^61320106-,61319734-61319817^61319962-61319994^61320067-,61319806-61319817^61319962-61319994…
ST4.03ch09	as_event	61319626	61320154	+	transcript_id "StLNC0172,StLNC1200,StLNC2385,StLNC1420,StLNC2578,StLNC0406,StLNC0958,StLNC1053"; gene_id "ST4.03ch09:61318282-61324023W"; flanks "61319626-,61320154]"; structure "1^3-6^8-9^14-,1^3-7^10-11^13-15^16-,1^3-7^10-11^14-,2^5-7^10-11^14-,2^5-7^10-12^14-,4^10-11^13-15^16-,4^10-11^14-,4^10-12^14-"; splice_chain "61319661^61319734-61319805^61319878-61319922^61320067-,61319661^61319734-61319…
ST4.03ch09	as_event	61319589	61320154	+	transcript_id "StLNC0172,StLNC1200,StLNC2385,StLNC1420,StLNC2578,StLNC0406,StLNC0958,StLNC1053,StLNC2108"; gene_id "ST4.03ch09:61318282-61324023W"; flanks "61319589^,61320154]"; structure "1-2^5-8^10-11^16-,1-2^5-9^12-13^15-17^18-,1-2^5-9^12-13^16-,1-4^7-9^12-13^16-,1-4^7-9^12-14^16-,1-6^12-13^15-17^18-,1-6^12-13^16-,1-6^12-14^16-,3-4^7-9^12-13^16-"; splice_chain "61319626-61319661^61319734-61319…
ST4.03ch09	as_event	61318372	61320154	+	transcript_id "StLNC1200,StLNC2385,StLNC2578,StLNC0406,StLNC0958,StLNC2108,StLNC1475,StLNC1387"; gene_id "ST4.03ch09:61318282-61324023W"; flanks "61318372[,61320154]"; structure "1^8-9^11-12^15-19^21-22^24-26^27-,1^8-9^11-12^15-19^21-22^25-,1^8-9^11-14^17-19^21-23^25-,1^8-9^11-16^21-22^24-26^27-,1^8-9^11-16^21-22^25-,1^8-9^13-14^17-19^21-22^25-,2^20-22^25-,3^4-5^6-7^10-12^18-19^21-22^25-"; splice…
ST4.03ch09	as_event	61321667	61321860	+	transcript_id "StLNC2461,StLNC0895"; gene_id "ST4.03ch09:61318282-61324023W"; flanks "61321667[,61321860-"; structure "1^,2^"; splice_chain "61321715^,61321763^"; sources "Undefined,Undefined"; NMorMRNA "null"; degree "4"; dimension "2_2";
ST4.03ch09	as_event	61321764	61321908	+	transcript_id "StLNC2574,StLNC0023"; gene_id "ST4.03ch09:61318282-61324023W"; flanks "61321764-,61321908-"; structure "1^,2^"; splice_chain "61321808^,61321811^"; sources "Undefined,Undefined"; NMorMRNA "null"; degree "4"; dimension "2_2";
ST4.03ch09	as_event	61321763	61321955	+	transcript_id "StLNC0895,StLNC1374/StLNC1818"; gene_id "ST4.03ch09:61318282-61324023W"; flanks "61321763^,61321955^"; structure "1-,2-"; splice_chain "61321860-,61321908-"; sources "Undefined,Undefined"; NMorMRNA "null"; degree "4"; dimension "2_2";
ST4.03ch09	as_event	61321661	61321955	+	transcript_id "StLNC1988,StLNC1374"; gene_id "ST4.03ch09:61318282-61324023W"; flanks "61321661[,61321955^"; structure "1^3-,2^4-"; splice_chain "61321709^61321902-,61321763^61321908-"; sources "Undefined,Undefined"; NMorMRNA "null"; degree "4"; dimension "2_2";
ST4.03ch09	as_event	61321619	61322018	+	transcript_id "StLNC1203,StLNC2314"; gene_id "ST4.03ch09:61318282-61324023W"; flanks "61321619[,61322018^"; structure "1^3-,2^4-"; splice_chain "61321667^61321860-,61321763^61321908-"; sources "Undefined,Undefined"; NMorMRNA "null"; degree "4"; dimension "2_2";
ST4.03ch09	as_event	61321860	61322090	+	transcript_id "StLNC2461,StLNC0895"; gene_id "ST4.03ch09:61318282-61324023W"; flanks "61321860-,61322090^"; structure "1^4-,2^3-"; splice_chain "61321919^61322016-,61321955^61322004-"; sources "Undefined,Undefined"; NMorMRNA "null"; degree "4"; dimension "2_2";
ST4.03ch09	as_event	61318372	61322090	+	transcript_id "StLNC1813,StLNC2318"; gene_id "ST4.03ch09:61318282-61324023W"; flanks "61318372[,61322090^"; structure "1^3-4^6-,2^5-"; splice_chain "61318420^61319512-61319517^61322004-,61318426^61321956-"; sources "Undefined,Undefined"; NMorMRNA "null"; degree "4"; dimension "2_2";
ST4.03ch09	as_event	61321908	61322162	+	transcript_id "StLNC1374,StLNC2519/StLNC1324"; gene_id "ST4.03ch09:61318282-61324023W"; flanks "61321908-,61322162^"; structure "1^2-4^5-,3^6-"; splice_chain "61321955^61322004-61322090^61322139-,61322051^61322154-"; sources "Undefined,Undefined"; NMorMRNA "null"; degree "4"; dimension "2_2";
ST4.03ch09	as_event	61321763	61322162	+	transcript_id "StLNC0895,StLNC1374,StLNC2519/StLNC1324"; gene_id "ST4.03ch09:61318282-61324023W"; flanks "61321763^,61322162^"; structure "1-3^4-6^7-,2-3^4-6^7-,2-5^8-"; splice_chain "61321860-61321955^61322004-61322090^61322139-,61321908-61321955^61322004-61322090^61322139-,61321908-61322051^61322154-"; sources "Undefined,Undefined,Undefined"; NMorMRNA "null"; degree "9"; dimension "3_3";
ST4.03ch09	as_event	61319661	61322162	+	transcript_id "StLNC0376,StLNC2209"; gene_id "ST4.03ch09:61318282-61324023W"; flanks "61319661^,61322162^"; structure "1-2^6-,3-4^5-"; splice_chain "61319734-61319805^61322154-,61319806-61319856^61322121-"; sources "Undefined,Undefined"; NMorMRNA "null"; degree "4"; dimension "2_2";
ST4.03ch09	as_event	61319512	61322162	+	transcript_id "StLNC1813,StLNC1097,StLNC0376,StLNC2209"; gene_id "ST4.03ch09:61318282-61324023W"; flanks "61319512-,61322162^"; structure "1^10-11^14-,2^12-,3^4-5^6-7^15-,3^4-5^8-9^13-"; splice_chain "61319517^61322004-61322090^61322139-,61319529^61322112-,61319589^61319626-61319661^61319734-61319805^61322154-,61319589^61319626-61319661^61319806-61319856^61322121-"; sources "Undefined,Undefined,U…
ST4.03ch09	as_event	61318372	61322162	+	transcript_id "StLNC1813,StLNC1097,StLNC0376,StLNC2209,StLNC2318"; gene_id "ST4.03ch09:61318282-61324023W"; flanks "61318372[,61322162^"; structure "1^3-4^14-15^18-,1^3-5^16-,1^3-6^7-8^9-10^19-,1^3-6^7-8^11-12^17-,2^13-15^18-"; splice_chain "61318420^61319512-61319517^61322004-61322090^61322139-,61318420^61319512-61319529^61322112-,61318420^61319512-61319589^61319626-61319661^61319734-61319805^61…
ST4.03ch09	as_event	61321811	61322244	+	transcript_id "StLNC0158,StLNC0023"; gene_id "ST4.03ch09:61318282-61324023W"; flanks "61321811^,61322244-"; structure "0,1-2^"; splice_chain ",61321908-61321955^"; sources "Undefined,Undefined"; NMorMRNA "null"; degree "4"; dimension "2_2";
ST4.03ch09	as_event	61319512	61322258	+	transcript_id "StLNC2057,StLNC0473"; gene_id "ST4.03ch09:61318282-61324023W"; flanks "61319512-,61322258^"; structure "1^7-8^9-10^12-,2^3-4^5-6^11-"; splice_chain "61319565^61321764-61321808^61321953-61322018^61322196-,61319589^61319626-61319661^61319734-61319805^61322154-"; sources "Undefined,Undefined"; NMorMRNA "null"; degree "4"; dimension "2_2";
ST4.03ch09	as_event	61319512	61322259	+	transcript_id "StLNC1813,StLNC1097,StLNC0911,StLNC0479,StLNC0376,StLNC2209"; gene_id "ST4.03ch09:61318282-61324023W"; flanks "61319512-,61322259-"; structure "1^14-15^18-20^,2^16-20^,3^,4^12-13^,5^6-7^8-9^19-20^,5^6-7^10-11^17-20^"; splice_chain "61319517^61322004-61322090^61322139-61322162^,61319529^61322112-61322162^,61319532^,61319565^61321764-61321901^,61319589^61319626-61319661^61319734-6131…
ST4.03ch09	as_event	61318513	61322259	+	transcript_id "StLNC0414,StLNC2563"; gene_id "ST4.03ch09:61318282-61324023W"; flanks "61318513^,61322259-"; structure "1-2^3-4^,5-6^"; splice_chain "61318565-61318665^61319278-61319292^,61322091-61322162^"; sources "Undefined,Undefined"; NMorMRNA "null"; degree "4"; dimension "2_2";
ST4.03ch09	as_event	61318372	61322259	+	transcript_id "StLNC1813,StLNC1097,StLNC0911,StLNC0479,StLNC0376,StLNC2209,StLNC2318,StLNC0414,StLNC2067"; gene_id "ST4.03ch09:61318282-61324023W"; flanks "61318372[,61322259-"; structure "1^11-12^26-27^30-32^,1^11-13^28-32^,1^11-14^,1^11-15^23-24^,1^11-16^17-18^19-20^31-32^,1^11-16^17-18^21-22^29-32^,2^25-27^30-32^,3^5-6^9-10^,4^7-8^"; splice_chain "61318420^61319512-61319517^61322004-61322090^6…
ST4.03ch09	as_event	61321955	61322306	+	transcript_id "StLNC1374/StLNC1988/StLNC0895,StLNC0023/StLNC1818"; gene_id "ST4.03ch09:61318282-61324023W"; flanks "61321955^,61322306^"; structure "1-2^3-4^6-,5-"; splice_chain "61322004-61322090^61322139-61322162^61322259-,61322244-"; sources "Undefined,Undefined"; NMorMRNA "null"; degree "4"; dimension "2_2";
ST4.03ch09	as_event	61321908	61322306	+	transcript_id "StLNC1374,StLNC0023/StLNC1818,StLNC2519"; gene_id "ST4.03ch09:61318282-61324023W"; flanks "61321908-,61322306^"; structure "1^2-4^5-7^9-,1^8-,3^6-7^9-"; splice_chain "61321955^61322004-61322090^61322139-61322162^61322259-,61321955^61322244-,61322051^61322154-61322162^61322259-"; sources "Undefined,Undefined,Undefined"; NMorMRNA "null"; degree "9"; dimension "3_3";
ST4.03ch09	as_event	61321811	61322306	+	transcript_id "StLNC0023,StLNC2207,StLNC0158"; gene_id "ST4.03ch09:61318282-61324023W"; flanks "61321811^,61322306^"; structure "1-2^4-,3-,4-"; splice_chain "61321908-61321955^61322244-,61322217-,61322244-"; sources "Undefined,Undefined,Undefined"; NMorMRNA "null"; degree "9"; dimension "3_3";
ST4.03ch09	as_event	61321764	61322306	+	transcript_id "StLNC0023,StLNC2207,StLNC0158,StLNC0479"; gene_id "ST4.03ch09:61318282-61324023W"; flanks "61321764-,61322306^"; structure "1^3-4^6-,1^5-,1^6-,2^7-"; splice_chain "61321811^61321908-61321955^61322244-,61321811^61322217-,61321811^61322244-,61321901^61322259-"; sources "Undefined,Undefined,Undefined,Undefined"; NMorMRNA "null"; degree "16"; dimension "4_4";
ST4.03ch09	as_event	61321763	61322306	+	transcript_id "StLNC0895,StLNC1374,StLNC1818,StLNC2519"; gene_id "ST4.03ch09:61318282-61324023W"; flanks "61321763^,61322306^"; structure "1-3^4-6^7-9^11-,2-3^4-6^7-9^11-,2-3^10-,2-5^8-9^11-"; splice_chain "61321860-61321955^61322004-61322090^61322139-61322162^61322259-,61321908-61321955^61322004-61322090^61322139-61322162^61322259-,61321908-61321955^61322244-,61321908-61322051^61322154-61322162^…
ST4.03ch09	as_event	61319512	61322306	+	transcript_id "StLNC1813,StLNC1097,StLNC0911,StLNC0023,StLNC2207,StLNC0158,StLNC0479,StLNC0376,StLNC2209"; gene_id "ST4.03ch09:61318282-61324023W"; flanks "61319512-,61322306^"; structure "1^17-18^21-23^26-,2^19-23^26-,3^26-,4^12-13^15-16^25-,4^12-13^24-,4^12-13^25-,4^12-14^26-,5^6-7^8-9^22-23^26-,5^6-7^10-11^20-23^26-"; splice_chain "61319517^61322004-61322090^61322139-61322162^61322259-,6131952…
ST4.03ch09	as_event	61318372	61322306	+	transcript_id "StLNC1813,StLNC1097,StLNC0911,StLNC0023,StLNC2207,StLNC0479,StLNC0376,StLNC2209,StLNC2318,StLNC0414,StLNC2067"; gene_id "ST4.03ch09:61318282-61324023W"; flanks "61318372[,61322306^"; structure "1^11-12^29-30^33-35^38-,1^11-13^31-35^38-,1^11-14^38-,1^11-15^23-24^26-27^37-,1^11-15^23-24^36-,1^11-15^23-25^38-,1^11-16^17-18^19-20^34-35^38-,1^11-16^17-18^21-22^32-35^38-,2^28-30^33-35^38…
ST4.03ch09	as_event	61318301	61322306	+	transcript_id "StLNC0158,StLNC2563"; gene_id "ST4.03ch09:61318282-61324023W"; flanks "61318301[,61322306^"; structure "1^3-4^5-6^9-,2^7-8^10-"; splice_chain "61318420^61319512-61319565^61321764-61321811^61322244-,61318513^61322091-61322162^61322259-"; sources "Undefined,Undefined"; NMorMRNA "null"; degree "4"; dimension "2_2";
ST4.03ch09	as_event	61318513	61322307	+	transcript_id "StLNC1030,StLNC1268"; gene_id "ST4.03ch09:61318282-61324023W"; flanks "61318513^,61322307-"; structure "1-2^3-4^,5-6^"; splice_chain "61318565-61318660^61318840-61318860^,61322091-61322162^"; sources "Undefined,Undefined"; NMorMRNA "null"; degree "4"; dimension "2_2";
ST4.03ch09	as_event	61318301	61322307	+	transcript_id "StLNC0402,StLNC1268"; gene_id "ST4.03ch09:61318282-61324023W"; flanks "61318301[,61322307-"; structure "1^,2^3-4^"; splice_chain "61318489^,61318513^61322091-61322162^"; sources "Undefined,Undefined"; NMorMRNA "null"; degree "4"; dimension "2_2";
ST4.03ch09	as_event	61322162	61322384	+	transcript_id "StLNC2563/StLNC1813/StLNC2209/StLNC1097/StLNC0376/StLNC2318/StLNC1714/StLNC1134/StLNC1374/StLNC1988/StLNC2461/StLNC0895/StLNC2519,StLNC1268/StLNC1324"; gene_id "ST4.03ch09:61318282-61324023W"; flanks "61322162^,61322384^"; structure "1-2^4-,3-"; splice_chain "61322259-61322306^61322355-,61322307-"; sources "Undefined,Undefined"; NMorMRNA "null"; degree "4"; dimension "2_2";
ST4.03ch09	as_event	61321908	61322384	+	transcript_id "StLNC1374,StLNC0023/StLNC1818,StLNC2519,StLNC1324"; gene_id "ST4.03ch09:61318282-61324023W"; flanks "61321908-,61322384^"; structure "1^2-4^5-7^9-10^12-,1^8-10^12-,3^6-7^9-10^12-,3^6-7^11-"; splice_chain "61321955^61322004-61322090^61322139-61322162^61322259-61322306^61322355-,61321955^61322244-61322306^61322355-,61322051^61322154-61322162^61322259-61322306^61322355-,61322051^61322…
ST4.03ch09	as_event	61321763	61322384	+	transcript_id "StLNC0895,StLNC1374,StLNC1818,StLNC2519,StLNC1324"; gene_id "ST4.03ch09:61318282-61324023W"; flanks "61321763^,61322384^"; structure "1-3^4-6^7-9^11-12^14-,2-3^4-6^7-9^11-12^14-,2-3^10-12^14-,2-5^8-9^11-12^14-,2-5^8-9^13-"; splice_chain "61321860-61321955^61322004-61322090^61322139-61322162^61322259-61322306^61322355-,61321908-61321955^61322004-61322090^61322139-61322162^61322259-6…
ST4.03ch09	as_event	61318860	61322384	+	transcript_id "StLNC2067,StLNC1030"; gene_id "ST4.03ch09:61318282-61324023W"; flanks "61318860^,61322384^"; structure "1-2^4-,3-"; splice_chain "61322259-61322306^61322355-,61322307-"; sources "Undefined,Undefined"; NMorMRNA "null"; degree "4"; dimension "2_2";
ST4.03ch09	as_event	61318762	61322384	+	transcript_id "StLNC1705,StLNC2067"; gene_id "ST4.03ch09:61318282-61324023W"; flanks "61318762-,61322384^"; structure "1^4-,2^3-5^6-"; splice_chain "61318809^61322304-,61318860^61322259-61322306^61322355-"; sources "Undefined,Undefined"; NMorMRNA "null"; degree "4"; dimension "2_2";
ST4.03ch09	as_event	61318565	61322384	+	transcript_id "StLNC1030,StLNC0414"; gene_id "ST4.03ch09:61318282-61324023W"; flanks "61318565-,61322384^"; structure "1^3-4^9-,2^5-6^7-8^10-"; splice_chain "61318660^61318840-61318860^61322307-,61318665^61319278-61319292^61322259-61322306^61322355-"; sources "Undefined,Undefined"; NMorMRNA "null"; degree "4"; dimension "2_2";
ST4.03ch09	as_event	61318513	61322384	+	transcript_id "StLNC1030,StLNC0414,StLNC2563,StLNC1268"; gene_id "ST4.03ch09:61318282-61324023W"; flanks "61318513^,61322384^"; structure "1-2^4-5^12-,1-3^6-7^10-11^13-,8-9^10-11^13-,8-9^12-"; splice_chain "61318565-61318660^61318840-61318860^61322307-,61318565-61318665^61319278-61319292^61322259-61322306^61322355-,61322091-61322162^61322259-61322306^61322355-,61322091-61322162^61322307-"; source…
ST4.03ch09	as_event	61318372	61322384	+	transcript_id "StLNC1813,StLNC1097,StLNC0911,StLNC0023,StLNC2207,StLNC0479,StLNC0376,StLNC2209,StLNC2318,StLNC1030,StLNC0414,StLNC2067,StLNC1705"; gene_id "ST4.03ch09:61318282-61324023W"; flanks "61318372[,61322384^"; structure "1^15-16^33-34^37-39^42-44^46-,1^15-17^35-39^42-44^46-,1^15-18^42-44^46-,1^15-19^27-28^30-31^41-44^46-,1^15-19^27-28^40-44^46-,1^15-19^27-29^42-44^46-,1^15-20^21-22^23-24^…
ST4.03ch09	as_event	61318301	61322384	+	transcript_id "StLNC0158,StLNC0402,StLNC2563,StLNC1268"; gene_id "ST4.03ch09:61318282-61324023W"; flanks "61318301[,61322384^"; structure "1^4-5^6-7^10-12^14-,2^13-,3^8-9^11-12^14-,3^8-9^13-"; splice_chain "61318420^61319512-61319565^61321764-61321811^61322244-61322306^61322355-,61318489^61322307-,61318513^61322091-61322162^61322259-61322306^61322355-,61318513^61322091-61322162^61322307-"; source…
ST4.03ch09	as_event	61319962	61322394	+	transcript_id "StLNC2295,StLNC0461/StLNC0602,StLNC0226"; gene_id "ST4.03ch09:61318282-61324023W"; flanks "61319962-,61322394-"; structure "1^3-5^,1^4-5^,2^"; splice_chain "61319994^61320031-61320129^,61319994^61320067-61320129^,61320000^"; sources "Undefined,Undefined,Undefined"; NMorMRNA "null"; degree "9"; dimension "3_3";
ST4.03ch09	as_event	61319805	61322394	+	transcript_id "StLNC1217/StLNC1693/StLNC0632,StLNC2023"; gene_id "ST4.03ch09:61318282-61324023W"; flanks "61319805^,61322394-"; structure "0,1-2^"; splice_chain ",61319878-61319949^"; sources "Undefined,Undefined"; NMorMRNA "null"; degree "4"; dimension "2_2";
ST4.03ch09	as_event	61319734	61322394	+	transcript_id "StLNC1217/StLNC1693/StLNC0632,StLNC2023,StLNC0602"; gene_id "ST4.03ch09:61318282-61324023W"; flanks "61319734-,61322394-"; structure "1^,1^3-4^,2^5-6^7-8^"; splice_chain "61319805^,61319805^61319878-61319949^,61319817^61319962-61319994^61320067-61320129^"; sources "Undefined,Undefined,Undefined"; NMorMRNA "null"; degree "9"; dimension "3_3";
ST4.03ch09	as_event	61319635	61322394	+	transcript_id "StLNC1693,StLNC0602,StLNC2295,StLNC0461,StLNC1062"; gene_id "ST4.03ch09:61318282-61324023W"; flanks "61319635-,61322394-"; structure "1^4-6^,1^4-7^8-9^11-12^,2^5-7^8-9^10-12^,2^5-7^8-9^11-12^,3^"; splice_chain "61319661^61319734-61319805^,61319661^61319734-61319817^61319962-61319994^61320067-61320129^,61319706^61319779-61319817^61319962-61319994^61320031-61320129^,61319706^61319779…
ST4.03ch09	as_event	61319626	61322394	+	transcript_id "StLNC1217/StLNC0632,StLNC2023,StLNC0226,StLNC2054"; gene_id "ST4.03ch09:61318282-61324023W"; flanks "61319626-,61322394-"; structure "1^4-6^,1^4-6^8-9^,2^5-7^10-11^,3^"; splice_chain "61319661^61319734-61319805^,61319661^61319734-61319805^61319878-61319949^,61319706^61319779-61319817^61319962-61320000^,61319733^"; sources "Undefined,Undefined,Undefined,Undefined"; NMorMRNA "null"; …
ST4.03ch09	as_event	61319512	61322394	+	transcript_id "StLNC1693,StLNC0602,StLNC2295,StLNC0461,StLNC1062,StLNC1217,StLNC2023,StLNC0226,StLNC2054"; gene_id "ST4.03ch09:61318282-61324023W"; flanks "61319512-,61322394-"; structure "1^4-5^8-10^,1^4-5^8-11^14-15^18-19^,1^4-6^9-11^14-15^17-19^,1^4-6^9-11^14-15^18-19^,1^4-7^,2^3-5^8-10^,2^3-5^8-10^12-13^,2^3-6^9-11^14-16^,2^3-7^"; splice_chain "61319562^61319635-61319661^61319734-61319805^,61…
ST4.03ch09	as_event	61322154	61323969	+	transcript_id "StLNC0376/StLNC2519,StLNC1324,StLNC0473"; gene_id "ST4.03ch09:61318282-61324023W"; flanks "61322154-,61323969-"; structure "1^3-4^6-7^,1^5-7^,2^"; splice_chain "61322162^61322259-61322306^61322355-61322384^,61322162^61322307-61322384^,61322258^"; sources "Undefined,Undefined,Undefined"; NMorMRNA "null"; degree "9"; dimension "3_3";
ST4.03ch09	as_event	61321908	61323969	+	transcript_id "StLNC1374,StLNC0023/StLNC1818,StLNC2314,StLNC2519,StLNC1324"; gene_id "ST4.03ch09:61318282-61324023W"; flanks "61321908-,61323969-"; structure "1^2-5^6-8^12-13^15-16^,1^10-13^15-16^,3^9-11^,4^7-8^12-13^15-16^,4^7-8^14-16^"; splice_chain "61321955^61322004-61322090^61322139-61322162^61322259-61322306^61322355-61322384^,61321955^61322244-61322306^61322355-61322384^,61322018^61322196-…
ST4.03ch09	as_event	61321860	61323969	+	transcript_id "StLNC2461,StLNC0895,StLNC1203"; gene_id "ST4.03ch09:61318282-61324023W"; flanks "61321860-,61323969-"; structure "1^4-6^7-8^11-12^13-14^,2^3-6^7-8^11-12^13-14^,5^9-10^"; splice_chain "61321919^61322016-61322090^61322139-61322162^61322259-61322306^61322355-61322384^,61321955^61322004-61322090^61322139-61322162^61322259-61322306^61322355-61322384^,61322018^61322196-61322258^"; source…
ST4.03ch09	as_event	61321764	61323969	+	transcript_id "StLNC2057,StLNC0023,StLNC2207,StLNC0158,StLNC0479"; gene_id "ST4.03ch09:61318282-61324023W"; flanks "61321764-,61323969-"; structure "1^5-7^8-11^,2^4-6^10-13^14-15^,2^9-13^14-15^,2^10-13^14-15^,3^12-13^14-15^"; splice_chain "61321808^61321953-61322018^61322196-61322258^,61321811^61321908-61321955^61322244-61322306^61322355-61322384^,61321811^61322217-61322306^61322355-61322384^,613…
ST4.03ch09	as_event	61321763	61323969	+	transcript_id "StLNC0895,StLNC1374,StLNC1818,StLNC2314,StLNC2519,StLNC1324"; gene_id "ST4.03ch09:61318282-61324023W"; flanks "61321763^,61323969-"; structure "1-3^4-7^8-10^14-15^17-18^,2-3^4-7^8-10^14-15^17-18^,2-3^12-15^17-18^,2-5^11-13^,2-6^9-10^14-15^17-18^,2-6^9-10^16-18^"; splice_chain "61321860-61321955^61322004-61322090^61322139-61322162^61322259-61322306^61322355-61322384^,61321908-613219…
ST4.03ch09	as_event	61319661	61323969	+	transcript_id "StLNC0376,StLNC0473,StLNC2209"; gene_id "ST4.03ch09:61318282-61324023W"; flanks "61319661^,61323969-"; structure "1-2^6-7^9-10^11-12^,1-2^6-8^,3-4^5-7^9-10^11-12^"; splice_chain "61319734-61319805^61322154-61322162^61322259-61322306^61322355-61322384^,61319734-61319805^61322154-61322258^,61319806-61319856^61322121-61322162^61322259-61322306^61322355-61322384^"; sources "Undefined,U…
ST4.03ch09	as_event	61319512	61323969	+	transcript_id "StLNC1813,StLNC1097,StLNC0911,StLNC2057,StLNC0023,StLNC2207,StLNC0158,StLNC0479,StLNC0376,StLNC0473,StLNC2209"; gene_id "ST4.03ch09:61318282-61324023W"; flanks "61319512-,61323969-"; structure "1^19-21^24-26^31-32^33-34^,2^22-26^31-32^33-34^,3^31-32^33-34^,4^12-13^17-20^27-30^,4^12-14^16-18^29-32^33-34^,4^12-14^28-32^33-34^,4^12-14^29-32^33-34^,4^12-15^31-32^33-34^,5^6-7^8-9^25-26^…
ST4.03ch09	as_event	61318372	61323969	+	transcript_id "StLNC1813,StLNC1097,StLNC0911,StLNC2057,StLNC0023,StLNC2207,StLNC0479,StLNC0376,StLNC0473,StLNC2209,StLNC2318,StLNC1030,StLNC0414,StLNC2067,StLNC1705"; gene_id "ST4.03ch09:61318282-61324023W"; flanks "61318372[,61323969-"; structure "1^15-16^35-37^40-42^47-49^51-52^,1^15-17^38-42^47-49^51-52^,1^15-18^47-49^51-52^,1^15-19^27-28^32-36^43-46^,1^15-19^27-29^31-33^45-49^51-52^,1^15-19^2…
ST4.03ch09	as_event	5546526	5549326	-	transcript_id "StLNC0185,StLNC0263"; gene_id "ST4.03ch09:5546159-5549460C"; flanks "5549326^,5546526-"; structure "0,1-2^"; splice_chain ",5547968-5547941^"; sources "Undefined,Undefined"; NMorMRNA "null"; degree "4"; dimension "2_2";
ST4.03ch09	as_event	15896901	15897103	-	transcript_id "StLNC0603,StLNC0043"; gene_id "ST4.03ch09:15896901-15897284C"; flanks "15897103^,15896901]"; structure "1-,2-"; splice_chain "15897025-,15897007-"; sources "Undefined,Undefined"; NMorMRNA "null"; degree "4"; dimension "2_2";
ST4.03ch09	as_event	17556208	17557632	-	transcript_id "StLNC0381,StLNC2389"; gene_id "ST4.03ch09:17552937-17557879C"; flanks "17557632^,17556208-"; structure "0,1-2^"; splice_chain ",17557063-17556983^"; sources "Undefined,Undefined"; NMorMRNA "null"; degree "4"; dimension "2_2";
ST4.03ch09	as_event	17556119	17557632	-	transcript_id "StLNC2389,StLNC1667,StLNC0381"; gene_id "ST4.03ch09:17552937-17557879C"; flanks "17557632^,17556119^"; structure "1-2^4-,3-,4-"; splice_chain "17557063-17556983^17556208-,17556250-,17556208-"; sources "Undefined,Undefined,Undefined"; NMorMRNA "null"; degree "9"; dimension "3_3";
ST4.03ch09	as_event	27585037	27586009	-	transcript_id "StLNC1107,StLNC0130"; gene_id "ST4.03ch09:27584546-27592011C"; flanks "27586009-,27585037-"; structure "1^,2^"; splice_chain "27585878^,27585873^"; sources "Undefined,Undefined"; NMorMRNA "null"; degree "4"; dimension "2_2";
ST4.03ch09	as_event	35479306	35480533	-	transcript_id "StLNC1968,StLNC1060"; gene_id "ST4.03ch09:35479306-35480714C"; flanks "35480533^,35479306]"; structure "1-,2-"; splice_chain "35479360-,35479355-"; sources "Undefined,Undefined"; NMorMRNA "null"; degree "4"; dimension "2_2";
ST4.03ch09	as_event	50873190	50878003	-	transcript_id "StLNC1244,StLNC2013"; gene_id "ST4.03ch09:50872622-50879027C"; flanks "50878003-,50873190-"; structure "1^,2^"; splice_chain "50877907^,50877903^"; sources "Undefined,Undefined"; NMorMRNA "null"; degree "4"; dimension "2_2";
ST4.03ch09	as_event	60940744	60941064	-	transcript_id "StLNC1436,StLNC2025"; gene_id "ST4.03ch09:60938297-60941430C"; flanks "60941064^,60940744^"; structure "1-,2-"; splice_chain "60940849-,60940843-"; sources "Undefined,Undefined"; NMorMRNA "null"; degree "4"; dimension "2_2";
ST4.03ch09	as_event	60938301	60940043	-	transcript_id "StLNC0835,StLNC2025"; gene_id "ST4.03ch09:60938297-60941430C"; flanks "60940043^,60938301]"; structure "1-,2-"; splice_chain "60939799-,60938548-"; sources "Undefined,Undefined"; NMorMRNA "null"; degree "4"; dimension "2_2";
ST4.03ch10	as_event	2323344	2323778	+	transcript_id "StLNC2166,StLNC1642"; gene_id "ST4.03ch10:2321366-2325275W"; flanks "2323344^,2323778^"; structure "1-,2-"; splice_chain "2323473-,2323649-"; sources "Undefined,Undefined"; NMorMRNA "null"; degree "4"; dimension "2_2";
ST4.03ch10	as_event	2323285	2323778	+	transcript_id "StLNC0859,StLNC2166,StLNC1642"; gene_id "ST4.03ch10:2321366-2325275W"; flanks "2323285-,2323778^"; structure "0,1^2-,1^3-"; splice_chain ",2323344^2323473-,2323344^2323649-"; sources "Undefined,Undefined,Undefined"; NMorMRNA "null"; degree "9"; dimension "3_3";
ST4.03ch10	as_event	3040118	3042172	+	transcript_id "StLNC1122,StLNC1970"; gene_id "ST4.03ch10:3039603-3042172W"; flanks "3040118^,3042172]"; structure "1-,2-"; splice_chain "3041628-,3042131-"; sources "Undefined,Undefined"; NMorMRNA "null"; degree "4"; dimension "2_2";
ST4.03ch10	as_event	28556059	28556382	+	transcript_id "StLNC0892,StLNC2327"; gene_id "ST4.03ch10:28552101-28567553W"; flanks "28556059-,28556382^"; structure "0,1^2-"; splice_chain ",28556115^28556319-"; sources "Undefined,Undefined"; NMorMRNA "null"; degree "4"; dimension "2_2";
ST4.03ch10	as_event	39908973	39909436	+	transcript_id "StLNC1877,StLNC0685"; gene_id "ST4.03ch10:39908942-39912833W"; flanks "39908973[,39909436-"; structure "1^,2^"; splice_chain "39909289^,39909345^"; sources "Undefined,Undefined"; NMorMRNA "null"; degree "4"; dimension "2_2";
ST4.03ch10	as_event	39909289	39909496	+	transcript_id "StLNC2487/StLNC1066/StLNC2135/StLNC1071/StLNC1061/StLNC1877/StLNC1478,StLNC2831"; gene_id "ST4.03ch10:39908942-39912833W"; flanks "39909289^,39909496^"; structure "1-,2-"; splice_chain "39909436-,39909444-"; sources "Undefined,Undefined"; NMorMRNA "null"; degree "4"; dimension "2_2";
ST4.03ch10	as_event	39910364	39910695	+	transcript_id "StLNC1066/StLNC0685,StLNC1877,StLNC2487/StLNC1061"; gene_id "ST4.03ch10:39908942-39912833W"; flanks "39910364^,39910695^"; structure "1-,2-,3-"; splice_chain "39910467-,39910475-,39910612-"; sources "Undefined,Undefined,Undefined"; NMorMRNA "null"; degree "9"; dimension "3_3";
ST4.03ch10	as_event	39910291	39910695	+	transcript_id "StLNC1071,StLNC1066/StLNC0685,StLNC1877,StLNC2487/StLNC1061"; gene_id "ST4.03ch10:39908942-39912833W"; flanks "39910291-,39910695^"; structure "0,1^2-,1^3-,1^4-"; splice_chain ",39910364^39910467-,39910364^39910475-,39910364^39910612-"; sources "Undefined,Undefined,Undefined,Undefined"; NMorMRNA "null"; degree "16"; dimension "4_4";
ST4.03ch10	as_event	39909496	39910958	+	transcript_id "StLNC2135/StLNC2831/StLNC1478,StLNC1066/StLNC0685,StLNC1877,StLNC2487/StLNC1061,StLNC1071"; gene_id "ST4.03ch10:39908942-39912833W"; flanks "39909496^,39910958-"; structure "0,1-2^3-6^,1-2^4-6^,1-2^5-6^,1-6^"; splice_chain ",39910291-39910364^39910467-39910695^,39910291-39910364^39910475-39910695^,39910291-39910364^39910612-39910695^,39910291-39910695^"; sources "Undefined,Undefine…
ST4.03ch10	as_event	39977868	39978929	+	transcript_id "StLNC1594,StLNC0103"; gene_id "ST4.03ch10:39977821-39979169W"; flanks "39977868^,39978929-"; structure "0,1-2^"; splice_chain ",39978630-39978693^"; sources "Undefined,Undefined"; NMorMRNA "null"; degree "4"; dimension "2_2";
ST4.03ch10	as_event	39977868	39978932	+	transcript_id "StLNC2096,StLNC0169"; gene_id "ST4.03ch10:39977821-39979169W"; flanks "39977868^,39978932-"; structure "0,1-2^"; splice_chain ",39978630-39978693^"; sources "Undefined,Undefined"; NMorMRNA "null"; degree "4"; dimension "2_2";
ST4.03ch10	as_event	39977868	39979166	+	transcript_id "StLNC0169,StLNC1594"; gene_id "ST4.03ch10:39977821-39979169W"; flanks "39977868^,39979166]"; structure "1-2^4-,3-"; splice_chain "39978630-39978693^39978932-,39978929-"; sources "Undefined,Undefined"; NMorMRNA "null"; degree "4"; dimension "2_2";
ST4.03ch10	as_event	42007704	42008196	+	transcript_id "StLNC0111,StLNC1462"; gene_id "ST4.03ch10:42006795-42008451W"; flanks "42007704-,42008196-"; structure "1^,2^"; splice_chain "42007750^,42007792^"; sources "Undefined,Undefined"; NMorMRNA "null"; degree "4"; dimension "2_2";
ST4.03ch10	as_event	42007502	42008196	+	transcript_id "StLNC2823,StLNC0111,StLNC1462"; gene_id "ST4.03ch10:42006795-42008451W"; flanks "42007502^,42008196-"; structure "0,1-2^,1-3^"; splice_chain ",42007704-42007750^,42007704-42007792^"; sources "Undefined,Undefined,Undefined"; NMorMRNA "null"; degree "9"; dimension "3_3";
ST4.03ch10	as_event	47341738	47341968	+	transcript_id "StLNC2083,StLNC1885"; gene_id "ST4.03ch10:47308600-47362109W"; flanks "47341738[,47341968-"; structure "1^,2^"; splice_chain "47341796^,47341863^"; sources "Undefined,Undefined"; NMorMRNA "null"; degree "4"; dimension "2_2";
ST4.03ch10	as_event	47340917	47341968	+	transcript_id "StLNC2626,StLNC2201"; gene_id "ST4.03ch10:47308600-47362109W"; flanks "47340917^,47341968-"; structure "0,1-2^"; splice_chain ",47341713-47341796^"; sources "Undefined,Undefined"; NMorMRNA "null"; degree "4"; dimension "2_2";
ST4.03ch10	as_event	47342049	47361581	+	transcript_id "StLNC2254/StLNC2083/StLNC1885/StLNC2626,StLNC2201"; gene_id "ST4.03ch10:47308600-47362109W"; flanks "47342049^,47361581-"; structure "0,1-2^3-4^5-6^"; splice_chain ",47353382-47353502^47353906-47354020^47354108-47354193^"; sources "Undefined,Undefined"; NMorMRNA "null"; degree "4"; dimension "2_2";
ST4.03ch10	as_event	47340917	47361581	+	transcript_id "StLNC2364,StLNC2201,StLNC2626"; gene_id "ST4.03ch10:47308600-47362109W"; flanks "47340917^,47361581-"; structure "0,1-2^3-4^5-6^7-8^9-10^,3-4^"; splice_chain ",47341713-47341796^47341968-47342049^47353382-47353502^47353906-47354020^47354108-47354193^,47341968-47342049^"; sources "Undefined,Undefined,Undefined"; NMorMRNA "null"; degree "9"; dimension "3_3";
ST4.03ch10	as_event	53604259	53604405	+	transcript_id "StLNC1513,StLNC2510"; gene_id "ST4.03ch10:53489274-53605855W"; flanks "53604259^,53604405^"; structure "1-,2-"; splice_chain "53604331-,53604339-"; sources "Undefined,Undefined"; NMorMRNA "null"; degree "4"; dimension "2_2";
ST4.03ch10	as_event	53603792	53604405	+	transcript_id "StLNC2768/StLNC0209,StLNC1513"; gene_id "ST4.03ch10:53489274-53605855W"; flanks "53603792^,53604405^"; structure "1-,2-3^4-"; splice_chain "53603891-,53603910-53604259^53604331-"; sources "Undefined,Undefined"; NMorMRNA "null"; degree "4"; dimension "2_2";
ST4.03ch10	as_event	53603477	53604405	+	transcript_id "StLNC1342,StLNC2768"; gene_id "ST4.03ch10:53489274-53605855W"; flanks "53603477-,53604405^"; structure "1^6-,2^3-4^5-"; splice_chain "53603491^53604346-,53603556^53603717-53603792^53603891-"; sources "Undefined,Undefined"; NMorMRNA "null"; degree "4"; dimension "2_2";
ST4.03ch10	as_event	53604551	53604944	+	transcript_id "StLNC2768,StLNC1342/StLNC1513/StLNC0209/StLNC2510"; gene_id "ST4.03ch10:53489274-53605855W"; flanks "53604551-,53604944^"; structure "0,1^2-"; splice_chain ",53604618^53604726-"; sources "Undefined,Undefined"; NMorMRNA "null"; degree "4"; dimension "2_2";
ST4.03ch10	as_event	53604944	53605287	+	transcript_id "StLNC1342/StLNC1513/StLNC2510,StLNC0209"; gene_id "ST4.03ch10:53489274-53605855W"; flanks "53604944^,53605287^"; structure "1-,2-"; splice_chain "53605161-,53605165-"; sources "Undefined,Undefined"; NMorMRNA "null"; degree "4"; dimension "2_2";
ST4.03ch10	as_event	53789171	53789442	+	transcript_id "StLNC2614,StLNC1784"; gene_id "ST4.03ch10:53789123-53789641W"; flanks "53789171^,53789442-"; structure "0,1-2^"; splice_chain ",53789262-53789351^"; sources "Undefined,Undefined"; NMorMRNA "null"; degree "4"; dimension "2_2";
ST4.03ch10	as_event	53789351	53789576	+	transcript_id "StLNC1784,StLNC2800"; gene_id "ST4.03ch10:53789123-53789641W"; flanks "53789351^,53789576^"; structure "1-,2-"; splice_chain "53789442-,53789532-"; sources "Undefined,Undefined"; NMorMRNA "null"; degree "4"; dimension "2_2";
ST4.03ch10	as_event	53789171	53789576	+	transcript_id "StLNC1784,StLNC2800,StLNC1844,StLNC2614"; gene_id "ST4.03ch10:53789123-53789641W"; flanks "53789171^,53789576^"; structure "1-2^4-,1-2^5-,3-,4-"; splice_chain "53789262-53789351^53789442-,53789262-53789351^53789532-,53789352-,53789442-"; sources "Undefined,Undefined,Undefined,Undefined"; NMorMRNA "null"; degree "16"; dimension "4_4";
ST4.03ch10	as_event	57875407	57878753	+	transcript_id "StLNC1543,StLNC0439/StLNC0539"; gene_id "ST4.03ch10:57873431-57878965W"; flanks "57875407^,57878753-"; structure "0,1-2^"; splice_chain ",57876328-57876399^"; sources "Undefined,Undefined"; NMorMRNA "null"; degree "4"; dimension "2_2";
ST4.03ch10	as_event	57873808	57878753	+	transcript_id "StLNC1135,StLNC1543"; gene_id "ST4.03ch10:57873431-57878965W"; flanks "57873808^,57878753-"; structure "0,1-2^3-4^"; splice_chain ",57874010-57874187^57875323-57875407^"; sources "Undefined,Undefined"; NMorMRNA "null"; degree "4"; dimension "2_2";
ST4.03ch10	as_event	1163790	1164777	-	transcript_id "StLNC2190/StLNC2773/StLNC1344,StLNC0668"; gene_id "ST4.03ch10:1144905-1165948C"; flanks "1164777^,1163790^"; structure "1-,2-"; splice_chain "1164298-,1164231-"; sources "Undefined,Undefined"; NMorMRNA "null"; degree "4"; dimension "2_2";
ST4.03ch10	as_event	1158530	1162485	-	transcript_id "StLNC2773/StLNC1344,StLNC2190"; gene_id "ST4.03ch10:1144905-1165948C"; flanks "1162485^,1158530^"; structure "1-,2-"; splice_chain "1159126-,1158731-"; sources "Undefined,Undefined"; NMorMRNA "null"; degree "4"; dimension "2_2";
ST4.03ch10	as_event	1157225	1158530	-	transcript_id "StLNC2190/StLNC2773/StLNC1344/StLNC2433,StLNC0368"; gene_id "ST4.03ch10:1144905-1165948C"; flanks "1158530^,1157225^"; structure "1-,2-"; splice_chain "1157472-,1157399-"; sources "Undefined,Undefined"; NMorMRNA "null"; degree "4"; dimension "2_2";
ST4.03ch10	as_event	1147851	1158530	-	transcript_id "StLNC0240,StLNC2190/StLNC2773/StLNC1344/StLNC2433,StLNC0368"; gene_id "ST4.03ch10:1144905-1165948C"; flanks "1158530^,1147851-"; structure "0,1-3^,2-3^"; splice_chain ",1157472-1157225^,1157399-1157225^"; sources "Undefined,Undefined,Undefined"; NMorMRNA "null"; degree "9"; dimension "3_3";
ST4.03ch10	as_event	1145861	1146153	-	transcript_id "StLNC2190/StLNC1732/StLNC2773/StLNC0368/StLNC1344/StLNC0240,StLNC2433"; gene_id "ST4.03ch10:1144905-1165948C"; flanks "1146153^,1145861^"; structure "1-,2-"; splice_chain "1145956-,1145952-"; sources "Undefined,Undefined"; NMorMRNA "null"; degree "4"; dimension "2_2";
ST4.03ch10	as_event	5219186	5220746	-	transcript_id "StLNC2247,StLNC1040"; gene_id "ST4.03ch10:5218845-5220900C"; flanks "5220746^,5219186-"; structure "0,1-2^"; splice_chain ",5220534-5220492^"; sources "Undefined,Undefined"; NMorMRNA "null"; degree "4"; dimension "2_2";
ST4.03ch10	as_event	11547580	11549938	-	transcript_id "StLNC1485,StLNC0187"; gene_id "ST4.03ch10:11547232-11549986C"; flanks "11549938^,11547580-"; structure "0,1-2^"; splice_chain ",11548898-11548846^"; sources "Undefined,Undefined"; NMorMRNA "null"; degree "4"; dimension "2_2";
ST4.03ch10	as_event	13961429	13962157	-	transcript_id "StLNC0417,StLNC1588/StLNC1078"; gene_id "ST4.03ch10:13958695-13962183C"; flanks "13962157[,13961429-"; structure "1^,2^"; splice_chain "13961949^,13961945^"; sources "Undefined,Undefined"; NMorMRNA "null"; degree "4"; dimension "2_2";
ST4.03ch10	as_event	13961070	13961350	-	transcript_id "StLNC1257/StLNC0417/StLNC1078,StLNC1643/StLNC1588"; gene_id "ST4.03ch10:13958695-13962183C"; flanks "13961350^,13961070^"; structure "1-,2-"; splice_chain "13961187-,13961169-"; sources "Undefined,Undefined"; NMorMRNA "null"; degree "4"; dimension "2_2";
ST4.03ch10	as_event	13959230	13959460	-	transcript_id "StLNC0417,StLNC1257/StLNC1643/StLNC1588/StLNC1078"; gene_id "ST4.03ch10:13958695-13962183C"; flanks "13959460-,13959230-"; structure "1^,2^"; splice_chain "13959390^,13959363^"; sources "Undefined,Undefined"; NMorMRNA "null"; degree "4"; dimension "2_2";
ST4.03ch10	as_event	14234421	14245975	-	transcript_id "StLNC0294,StLNC0462"; gene_id "ST4.03ch10:14229063-14246083C"; flanks "14245975^,14234421-"; structure "0,1-2^"; splice_chain ",14242207-14241735^"; sources "Undefined,Undefined"; NMorMRNA "null"; degree "4"; dimension "2_2";
ST4.03ch10	as_event	15973361	15988805	-	transcript_id "StLNC2620/StLNC0057,StLNC1802"; gene_id "ST4.03ch10:15972564-15989033C"; flanks "15988805^,15973361-"; structure "0,1-2^"; splice_chain ",15987079-15987022^"; sources "Undefined,Undefined"; NMorMRNA "null"; degree "4"; dimension "2_2";
ST4.03ch10	as_event	18062845	18063614	-	transcript_id "StLNC0019,StLNC2640"; gene_id "ST4.03ch10:18061892-18064144C"; flanks "18063614^,18062845-"; structure "0,1-2^"; splice_chain ",18063010-18062963^"; sources "Undefined,Undefined"; NMorMRNA "null"; degree "4"; dimension "2_2";
ST4.03ch10	as_event	20683694	20684282	-	transcript_id "StLNC2311/StLNC2452,StLNC1290"; gene_id "ST4.03ch10:20681018-20684450C"; flanks "20684282^,20683694^"; structure "1-,2-"; splice_chain "20684144-,20683769-"; sources "Undefined,Undefined"; NMorMRNA "null"; degree "4"; dimension "2_2";
ST4.03ch10	as_event	20683694	20684430	-	transcript_id "StLNC2264,StLNC1290"; gene_id "ST4.03ch10:20681018-20684450C"; flanks "20684430[,20683694^"; structure "0,1^2-"; splice_chain ",20684282^20683769-"; sources "Undefined,Undefined"; NMorMRNA "null"; degree "4"; dimension "2_2";
ST4.03ch10	as_event	28512594	28517100	-	transcript_id "StLNC1750,StLNC0357"; gene_id "ST4.03ch10:28511198-28517551C"; flanks "28517100^,28512594-"; structure "0,1-2^"; splice_chain ",28512733-28512699^"; sources "Undefined,Undefined"; NMorMRNA "null"; degree "4"; dimension "2_2";
ST4.03ch10	as_event	45789695	45790147	-	transcript_id "StLNC1915,StLNC2225"; gene_id "ST4.03ch10:45788294-45790482C"; flanks "45790147-,45789695^"; structure "1^3-,2^4-"; splice_chain "45790057^45789892-,45790054^45789870-"; sources "Undefined,Undefined"; NMorMRNA "null"; degree "4"; dimension "2_2";
ST4.03ch10	as_event	47653351	47654203	-	transcript_id "StLNC0619,StLNC1499,StLNC1388"; gene_id "ST4.03ch10:47651991-47658380C"; flanks "47654203-,47653351^"; structure "0,1^2-,3^4-"; splice_chain ",47654135^47654027-,47653556^47653432-"; sources "Undefined,Undefined,Undefined"; NMorMRNA "null"; degree "9"; dimension "3_3";
ST4.03ch10	as_event	51611679	51629173	-	transcript_id "StLNC2525,StLNC0747"; gene_id "ST4.03ch10:51611679-51629512C"; flanks "51629173^,51611679]"; structure "1-2^4-,3-"; splice_chain "51618820-51618767^51612529-,51612583-"; sources "Undefined,Undefined"; NMorMRNA "null"; degree "4"; dimension "2_2";
ST4.03ch10	as_event	52882563	52882936	-	transcript_id "StLNC2409,StLNC0604"; gene_id "ST4.03ch10:52881800-52883296C"; flanks "52882936^,52882563^"; structure "1-,2-"; splice_chain "52882740-,52882703-"; sources "Undefined,Undefined"; NMorMRNA "null"; degree "4"; dimension "2_2";
ST4.03ch10	as_event	52882431	52882936	-	transcript_id "StLNC1854,StLNC2409,StLNC0604"; gene_id "ST4.03ch10:52881800-52883296C"; flanks "52882936^,52882431-"; structure "0,1-3^,2-3^"; splice_chain ",52882740-52882563^,52882703-52882563^"; sources "Undefined,Undefined,Undefined"; NMorMRNA "null"; degree "9"; dimension "3_3";
ST4.03ch11	as_event	887167	888566	+	transcript_id "StLNC1105,StLNC1997"; gene_id "ST4.03ch11:886845-909872W"; flanks "887167^,888566-"; structure "0,1-2^3-4^"; splice_chain ",887254-887341^888379-888490^"; sources "Undefined,Undefined"; NMorMRNA "null"; degree "4"; dimension "2_2";
ST4.03ch11	as_event	887167	889530	+	transcript_id "StLNC2206,StLNC1105"; gene_id "ST4.03ch11:886845-909872W"; flanks "887167^,889530^"; structure "1-2^4-,3-"; splice_chain "887254-887291^888613-,888566-"; sources "Undefined,Undefined"; NMorMRNA "null"; degree "4"; dimension "2_2";
ST4.03ch11	as_event	888613	894041	+	transcript_id "StLNC2206,StLNC1232,StLNC1445"; gene_id "ST4.03ch11:886845-909872W"; flanks "888613-,894041^"; structure "1^4-,2^5-,3^6-"; splice_chain "889530^892732-,890666^893460-,890716^893510-"; sources "Undefined,Undefined,Undefined"; NMorMRNA "null"; degree "9"; dimension "3_3";
ST4.03ch11	as_event	887167	894041	+	transcript_id "StLNC2206,StLNC1232,StLNC1445,StLNC1105"; gene_id "ST4.03ch11:886845-909872W"; flanks "887167^,894041^"; structure "1-2^4-5^8-,1-2^4-6^9-,1-2^4-7^10-,3-5^8-"; splice_chain "887254-887291^888613-889530^892732-,887254-887291^888613-890666^893460-,887254-887291^888613-890716^893510-,888566-889530^892732-"; sources "Undefined,Undefined,Undefined,Undefined"; NMorMRNA "null"; degree "16"…
ST4.03ch11	as_event	16958311	16958734	+	transcript_id "StLNC2059,StLNC1279"; gene_id "ST4.03ch11:16954750-16960199W"; flanks "16958311-,16958734^"; structure "0,1^2-"; splice_chain ",16958438^16958611-"; sources "Undefined,Undefined"; NMorMRNA "null"; degree "4"; dimension "2_2";
ST4.03ch11	as_event	16958438	16959555	+	transcript_id "StLNC2122,StLNC1279"; gene_id "ST4.03ch11:16954750-16960199W"; flanks "16958438^,16959555-"; structure "0,1-2^"; splice_chain ",16958611-16958734^"; sources "Undefined,Undefined"; NMorMRNA "null"; degree "4"; dimension "2_2";
ST4.03ch11	as_event	16958311	16959659	+	transcript_id "StLNC2369,StLNC1279"; gene_id "ST4.03ch11:16954750-16960199W"; flanks "16958311-,16959659^"; structure "0,1^2-3^4-"; splice_chain ",16958438^16958611-16958734^16959555-"; sources "Undefined,Undefined"; NMorMRNA "null"; degree "4"; dimension "2_2";
ST4.03ch11	as_event	16958734	16959733	+	transcript_id "StLNC2059,StLNC1279"; gene_id "ST4.03ch11:16954750-16960199W"; flanks "16958734^,16959733-"; structure "0,1-2^"; splice_chain ",16959555-16959659^"; sources "Undefined,Undefined"; NMorMRNA "null"; degree "4"; dimension "2_2";
ST4.03ch11	as_event	16958311	16959733	+	transcript_id "StLNC1279,StLNC2059,StLNC2369"; gene_id "ST4.03ch11:16954750-16960199W"; flanks "16958311-,16959733-"; structure "1^2-3^4-5^,3^,5^"; splice_chain "16958438^16958611-16958734^16959555-16959659^,16958734^,16959659^"; sources "Undefined,Undefined,Undefined"; NMorMRNA "null"; degree "9"; dimension "3_3";
ST4.03ch11	as_event	16958311	16960162	+	transcript_id "StLNC2122,StLNC2059,StLNC2369"; gene_id "ST4.03ch11:16954750-16960199W"; flanks "16958311-,16960162]"; structure "1^3-,2^5-,4^5-"; splice_chain "16958438^16959555-,16958734^16959733-,16959659^16959733-"; sources "Undefined,Undefined,Undefined"; NMorMRNA "null"; degree "9"; dimension "3_3";
ST4.03ch11	as_event	16958311	16960199	+	transcript_id "StLNC0480,StLNC1279"; gene_id "ST4.03ch11:16954750-16960199W"; flanks "16958311-,16960199]"; structure "0,1^2-3^4-5^6-"; splice_chain ",16958438^16958611-16958734^16959555-16959659^16959733-"; sources "Undefined,Undefined"; NMorMRNA "null"; degree "4"; dimension "2_2";
ST4.03ch11	as_event	42044364	42045355	+	transcript_id "StLNC2792,StLNC0464/StLNC0182/StLNC1587/StLNC2782/StLNC2365/StLNC2130"; gene_id "ST4.03ch11:42043927-42249002W"; flanks "42044364^,42045355-"; structure "0,1-2^"; splice_chain ",42044469-42044517^"; sources "Undefined,Undefined"; NMorMRNA "null"; degree "4"; dimension "2_2";
ST4.03ch11	as_event	42045427	42069414	+	transcript_id "StLNC2365,StLNC2130"; gene_id "ST4.03ch11:42043927-42249002W"; flanks "42045427^,42069414-"; structure "0,1-2^"; splice_chain ",42045909-42046025^"; sources "Undefined,Undefined"; NMorMRNA "null"; degree "4"; dimension "2_2";
ST4.03ch11	as_event	42154587	42155658	+	transcript_id "StLNC1690/StLNC0534,StLNC0262"; gene_id "ST4.03ch11:42043927-42249002W"; flanks "42154587-,42155658-"; structure "1^3-4^,2^"; splice_chain "42154668^42154772-42154820^,42154716^"; sources "Undefined,Undefined"; NMorMRNA "null"; degree "4"; dimension "2_2";
ST4.03ch11	as_event	42045427	42156445	+	transcript_id "StLNC0182,StLNC1587"; gene_id "ST4.03ch11:42043927-42249002W"; flanks "42045427^,42156445-"; structure "1-2^,3-4^"; splice_chain "42045909-42046025^,42156196-42156312^"; sources "Undefined,Undefined"; NMorMRNA "null"; degree "4"; dimension "2_2";
ST4.03ch11	as_event	42156312	42156486	+	transcript_id "StLNC2782,StLNC1587"; gene_id "ST4.03ch11:42043927-42249002W"; flanks "42156312^,42156486^"; structure "1-,2-"; splice_chain "42156416-,42156445-"; sources "Undefined,Undefined"; NMorMRNA "null"; degree "4"; dimension "2_2";
ST4.03ch11	as_event	42193102	42193988	+	transcript_id "StLNC2006,StLNC2102/StLNC1000"; gene_id "ST4.03ch11:42043927-42249002W"; flanks "42193102^,42193988^"; structure "1-,2-"; splice_chain "42193891-,42193901-"; sources "Undefined,Undefined"; NMorMRNA "null"; degree "4"; dimension "2_2";
ST4.03ch11	as_event	42725237	42725706	+	transcript_id "StLNC1585,StLNC1999"; gene_id "ST4.03ch11:42723976-42725997W"; flanks "42725237-,42725706-"; structure "1^,2^"; splice_chain "42725358^,42725372^"; sources "Undefined,Undefined"; NMorMRNA "null"; degree "4"; dimension "2_2";
ST4.03ch11	as_event	42795651	42799612	+	transcript_id "StLNC0857,StLNC1253"; gene_id "ST4.03ch11:42740558-42856626W"; flanks "42795651^,42799612-"; structure "0,1-2^3-4^5-6^"; splice_chain ",42797356-42797396^42798370-42798423^42798512-42798663^"; sources "Undefined,Undefined"; NMorMRNA "null"; degree "4"; dimension "2_2";
ST4.03ch11	as_event	20591875	20596464	-	transcript_id "StLNC2506/StLNC0680,StLNC0325"; gene_id "ST4.03ch11:20586948-20597122C"; flanks "20596464^,20591875-"; structure "0,1-2^"; splice_chain ",20595646-20595343^"; sources "Undefined,Undefined"; NMorMRNA "null"; degree "4"; dimension "2_2";
ST4.03ch11	as_event	44152849	44153382	-	transcript_id "StLNC1544,StLNC2670"; gene_id "ST4.03ch11:44110554-44179750C"; flanks "44153382^,44152849-"; structure "0,1-2^"; splice_chain ",44153091-44152982^"; sources "Undefined,Undefined"; NMorMRNA "null"; degree "4"; dimension "2_2";
ST4.03ch11	as_event	44152453	44152722	-	transcript_id "StLNC2668,StLNC2670/StLNC1544"; gene_id "ST4.03ch11:44110554-44179750C"; flanks "44152722^,44152453^"; structure "1-,2-"; splice_chain "44152582-,44152579-"; sources "Undefined,Undefined"; NMorMRNA "null"; degree "4"; dimension "2_2";
ST4.03ch12	as_event	2227044	2227363	+	transcript_id "StLNC0718/StLNC0667/StLNC0722,StLNC0290"; gene_id "ST4.03ch12:2222024-2228491W"; flanks "2227044[,2227363^"; structure "0,1^2-"; splice_chain ",2227102^2227292-"; sources "Undefined,Undefined"; NMorMRNA "null"; degree "4"; dimension "2_2";
ST4.03ch12	as_event	2227292	2228491	+	transcript_id "StLNC0290,StLNC0403"; gene_id "ST4.03ch12:2222024-2228491W"; flanks "2227292-,2228491]"; structure "1^2-,3^4-"; splice_chain "2227363^2227790-,2228032^2228116-"; sources "Undefined,Undefined"; NMorMRNA "null"; degree "4"; dimension "2_2";
ST4.03ch12	as_event	3433606	3434656	+	transcript_id "StLNC0933,StLNC2844/StLNC2739/StLNC1663"; gene_id "ST4.03ch12:3394232-3441695W"; flanks "3433606[,3434656^"; structure "0,1^2-"; splice_chain ",3434246^3434553-"; sources "Undefined,Undefined"; NMorMRNA "null"; degree "4"; dimension "2_2";
ST4.03ch12	as_event	3434656	3437758	+	transcript_id "StLNC0933,StLNC2844/StLNC2739/StLNC1663"; gene_id "ST4.03ch12:3394232-3441695W"; flanks "3434656^,3437758-"; structure "0,1-2^"; splice_chain ",3437322-3437416^"; sources "Undefined,Undefined"; NMorMRNA "null"; degree "4"; dimension "2_2";
ST4.03ch12	as_event	3437758	3438042	+	transcript_id "StLNC0933/StLNC2739,StLNC0145/StLNC2844/StLNC1663"; gene_id "ST4.03ch12:3394232-3441695W"; flanks "3437758-,3438042^"; structure "0,1^2-"; splice_chain ",3437849^3437938-"; sources "Undefined,Undefined"; NMorMRNA "null"; degree "4"; dimension "2_2";
ST4.03ch12	as_event	3438228	3439990	+	transcript_id "StLNC0933/StLNC2739/StLNC1663,StLNC0145/StLNC2844"; gene_id "ST4.03ch12:3394232-3441695W"; flanks "3438228^,3439990-"; structure "0,1-2^"; splice_chain ",3439213-3439279^"; sources "Undefined,Undefined"; NMorMRNA "null"; degree "4"; dimension "2_2";
ST4.03ch12	as_event	14684396	14685255	+	transcript_id "StLNC1589,StLNC1564/StLNC1707"; gene_id "ST4.03ch12:14684002-14687376W"; flanks "14684396-,14685255-"; structure "1^,2^"; splice_chain "14684474^,14685180^"; sources "Undefined,Undefined"; NMorMRNA "null"; degree "4"; dimension "2_2";
ST4.03ch12	as_event	14684396	14685654	+	transcript_id "StLNC2041/StLNC2588/StLNC1422/StLNC1551,StLNC1564"; gene_id "ST4.03ch12:14684002-14687376W"; flanks "14684396-,14685654^"; structure "0,1^2-"; splice_chain ",14685180^14685255-"; sources "Undefined,Undefined"; NMorMRNA "null"; degree "4"; dimension "2_2";
ST4.03ch12	as_event	14685654	14686236	+	transcript_id "StLNC2041/StLNC0974/StLNC1564/StLNC2588/StLNC1422,StLNC1551"; gene_id "ST4.03ch12:14684002-14687376W"; flanks "14685654^,14686236^"; structure "1-,2-"; splice_chain "14686053-,14686122-"; sources "Undefined,Undefined"; NMorMRNA "null"; degree "4"; dimension "2_2";
ST4.03ch12	as_event	14685255	14686236	+	transcript_id "StLNC1589/StLNC2591,StLNC1707,StLNC1564"; gene_id "ST4.03ch12:14684002-14687376W"; flanks "14685255-,14686236^"; structure "0,1^2-,3^4-"; splice_chain ",14685299^14685458-,14685654^14686053-"; sources "Undefined,Undefined,Undefined"; NMorMRNA "null"; degree "9"; dimension "3_3";
ST4.03ch12	as_event	14684474	14686236	+	transcript_id "StLNC1589,StLNC1220/StLNC0134"; gene_id "ST4.03ch12:14684002-14687376W"; flanks "14684474^,14686236^"; structure "1-,2-"; splice_chain "14685255-,14686149-"; sources "Undefined,Undefined"; NMorMRNA "null"; degree "4"; dimension "2_2";
ST4.03ch12	as_event	14684396	14686236	+	transcript_id "StLNC2682,StLNC1589,StLNC1220/StLNC0134,StLNC1707,StLNC1564,StLNC2041/StLNC2588/StLNC1422,StLNC1551"; gene_id "ST4.03ch12:14684002-14687376W"; flanks "14684396-,14686236^"; structure "0,1^3-,1^9-,2^3-4^5-,2^3-6^7-,6^7-,6^8-"; splice_chain ",14684474^14685255-,14684474^14686149-,14685180^14685255-14685299^14685458-,14685180^14685255-14685654^14686053-,14685654^14686053-,14685654^146…
ST4.03ch12	as_event	14686236	14687334	+	transcript_id "StLNC2682,StLNC0134"; gene_id "ST4.03ch12:14684002-14687376W"; flanks "14686236^,14687334]"; structure "1-,2-"; splice_chain "14686329-,14686830-"; sources "Undefined,Undefined"; NMorMRNA "null"; degree "4"; dimension "2_2";
ST4.03ch12	as_event	14686236	14687376	+	transcript_id "StLNC1220,StLNC2041"; gene_id "ST4.03ch12:14684002-14687376W"; flanks "14686236^,14687376]"; structure "1-,2-"; splice_chain "14686329-,14686350-"; sources "Undefined,Undefined"; NMorMRNA "null"; degree "4"; dimension "2_2";
ST4.03ch12	as_event	23799882	23800417	+	transcript_id "StLNC1380/StLNC0496,StLNC1433"; gene_id "ST4.03ch12:23788517-23800795W"; flanks "23799882^,23800417-"; structure "0,1-2^"; splice_chain ",23800051-23800314^"; sources "Undefined,Undefined"; NMorMRNA "null"; degree "4"; dimension "2_2";
ST4.03ch12	as_event	23789090	23800417	+	transcript_id "StLNC2726/StLNC1024,StLNC1380/StLNC0496,StLNC1433"; gene_id "ST4.03ch12:23788517-23800795W"; flanks "23789090^,23800417-"; structure "0,1-2^,1-2^3-4^"; splice_chain ",23799790-23799882^,23799790-23799882^23800051-23800314^"; sources "Undefined,Undefined,Undefined"; NMorMRNA "null"; degree "9"; dimension "3_3";
ST4.03ch12	as_event	25975807	26055304	+	transcript_id "StLNC0754,StLNC1031"; gene_id "ST4.03ch12:25973329-26080810W"; flanks "25975807^,26055304-"; structure "1-2^3-4^,5-6^"; splice_chain "26032641-26032768^26036739-26036879^,26044548-26044814^"; sources "Undefined,Undefined"; NMorMRNA "null"; degree "4"; dimension "2_2";
ST4.03ch12	as_event	26839455	26839919	+	transcript_id "StLNC0696,StLNC2074"; gene_id "ST4.03ch12:26825497-26844715W"; flanks "26839455-,26839919^"; structure "0,1^2-"; splice_chain ",26839738^26839874-"; sources "Undefined,Undefined"; NMorMRNA "null"; degree "4"; dimension "2_2";
ST4.03ch12	as_event	26842095	26842462	+	transcript_id "StLNC2074,StLNC0696"; gene_id "ST4.03ch12:26825497-26844715W"; flanks "26842095-,26842462^"; structure "0,1^2-"; splice_chain ",26842225^26842339-"; sources "Undefined,Undefined"; NMorMRNA "null"; degree "4"; dimension "2_2";
ST4.03ch12	as_event	27254232	27262674	+	transcript_id "StLNC1423/StLNC1897,StLNC1198/StLNC0267"; gene_id "ST4.03ch12:27254187-27264535W"; flanks "27254232^,27262674^"; structure "1-,2-"; splice_chain "27262472-,27262477-"; sources "Undefined,Undefined"; NMorMRNA "null"; degree "4"; dimension "2_2";
ST4.03ch12	as_event	53785994	53786164	+	transcript_id "StLNC2628,StLNC2187"; gene_id "ST4.03ch12:53781703-53788003W"; flanks "53785994^,53786164^"; structure "1-,2-"; splice_chain "53786065-,53786073-"; sources "Undefined,Undefined"; NMorMRNA "null"; degree "4"; dimension "2_2";
ST4.03ch12	as_event	59570361	59581595	+	transcript_id "StLNC0853,StLNC2379"; gene_id "ST4.03ch12:59569668-59584783W"; flanks "59570361[,59581595-"; structure "1^3-4^,2^"; splice_chain "59570388^59570485-59570538^,59570442^"; sources "Undefined,Undefined"; NMorMRNA "null"; degree "4"; dimension "2_2";
ST4.03ch12	as_event	59569980	59581595	+	transcript_id "StLNC2283,StLNC2227/StLNC1577"; gene_id "ST4.03ch12:59569668-59584783W"; flanks "59569980[,59581595-"; structure "1^3-4^,2^"; splice_chain "59570004^59570485-59570538^,59570058^"; sources "Undefined,Undefined"; NMorMRNA "null"; degree "4"; dimension "2_2";
ST4.03ch12	as_event	59569978	59581595	+	transcript_id "StLNC0830,StLNC2204"; gene_id "ST4.03ch12:59569668-59584783W"; flanks "59569978[,59581595-"; structure "1^3-4^,2^"; splice_chain "59570004^59570485-59570538^,59570058^"; sources "Undefined,Undefined"; NMorMRNA "null"; degree "4"; dimension "2_2";
ST4.03ch12	as_event	59570485	59581684	+	transcript_id "StLNC1616,StLNC0830/StLNC2813"; gene_id "ST4.03ch12:59569668-59584783W"; flanks "59570485-,59581684^"; structure "1^3-,2^4-"; splice_chain "59570526^59581583-,59570538^59581595-"; sources "Undefined,Undefined"; NMorMRNA "null"; degree "4"; dimension "2_2";
ST4.03ch12	as_event	59570485	59581726	+	transcript_id "StLNC1083,StLNC2283/StLNC2505/StLNC0853"; gene_id "ST4.03ch12:59569668-59584783W"; flanks "59570485-,59581726^"; structure "1^3-,2^4-"; splice_chain "59570526^59581583-,59570538^59581595-"; sources "Undefined,Undefined"; NMorMRNA "null"; degree "4"; dimension "2_2";
ST4.03ch12	as_event	59581595	59583445	+	transcript_id "StLNC2204/StLNC2813,StLNC2283/StLNC1577/StLNC1123/StLNC2505/StLNC2368/StLNC2160"; gene_id "ST4.03ch12:59569668-59584783W"; flanks "59581595-,59583445-"; structure "1^3-4^,2^"; splice_chain "59581684^59581781-59581822^,59581726^"; sources "Undefined,Undefined"; NMorMRNA "null"; degree "4"; dimension "2_2";
ST4.03ch12	as_event	59581583	59583445	+	transcript_id "StLNC1616,StLNC1083"; gene_id "ST4.03ch12:59569668-59584783W"; flanks "59581583-,59583445-"; structure "1^3-4^,2^"; splice_chain "59581684^59581781-59581822^,59581726^"; sources "Undefined,Undefined"; NMorMRNA "null"; degree "4"; dimension "2_2";
ST4.03ch12	as_event	59581538	59583445	+	transcript_id "StLNC2678,StLNC1875"; gene_id "ST4.03ch12:59569668-59584783W"; flanks "59581538-,59583445-"; structure "1^3-4^,2^"; splice_chain "59581684^59581781-59581822^,59581726^"; sources "Undefined,Undefined"; NMorMRNA "null"; degree "4"; dimension "2_2";
ST4.03ch12	as_event	59570485	59583445	+	transcript_id "StLNC1616,StLNC1083,StLNC2813,StLNC2283/StLNC2505"; gene_id "ST4.03ch12:59569668-59584783W"; flanks "59570485-,59583445-"; structure "1^3-5^7-8^,1^3-6^,2^4-5^7-8^,2^4-6^"; splice_chain "59570526^59581583-59581684^59581781-59581822^,59570526^59581583-59581726^,59570538^59581595-59581684^59581781-59581822^,59570538^59581595-59581726^"; sources "Undefined,Undefined,Undefined,Undefined…
ST4.03ch12	as_event	59569980	59583445	+	transcript_id "StLNC2283,StLNC1577,StLNC1565"; gene_id "ST4.03ch12:59569668-59584783W"; flanks "59569980[,59583445-"; structure "1^4-5^10-11^,2^10-11^,3^6-7^8-9^12-13^"; splice_chain "59570004^59570485-59570538^59581595-59581726^,59570058^59581595-59581726^,59570070^59575131-59575181^59576951-59577025^59581727-59581822^"; sources "Undefined,Undefined,Undefined"; NMorMRNA "null"; degree "9"; dimen…
ST4.03ch12	as_event	59581595	59584495	+	transcript_id "StLNC0830,StLNC2227/StLNC0853/StLNC2379"; gene_id "ST4.03ch12:59569668-59584783W"; flanks "59581595-,59584495-"; structure "1^3-4^,2^"; splice_chain "59581684^59581781-59581822^,59581726^"; sources "Undefined,Undefined"; NMorMRNA "null"; degree "4"; dimension "2_2";
ST4.03ch12	as_event	531164	531854	-	transcript_id "StLNC0579,StLNC1283"; gene_id "ST4.03ch12:524549-532148C"; flanks "531854^,531164-"; structure "1-2^,3-4^"; splice_chain "531677-531517^,531501-531341^"; sources "Undefined,Undefined"; NMorMRNA "null"; degree "4"; dimension "2_2";
ST4.03ch12	as_event	531116	531678	-	transcript_id "StLNC0992,StLNC1403"; gene_id "ST4.03ch12:524549-532148C"; flanks "531678^,531116]"; structure "1-2^4-,3-"; splice_chain "531501-531341^531164-,531325-"; sources "Undefined,Undefined"; NMorMRNA "null"; degree "4"; dimension "2_2";
ST4.03ch12	as_event	2078595	2082704	-	transcript_id "StLNC2560,StLNC0127/StLNC1810"; gene_id "ST4.03ch12:2077613-2082945C"; flanks "2082704^,2078595^"; structure "1-2^4-,3-"; splice_chain "2082618-2082613^2078654-,2078660-"; sources "Undefined,Undefined"; NMorMRNA "null"; degree "4"; dimension "2_2";
ST4.03ch12	as_event	2078242	2078514	-	transcript_id "StLNC0127,StLNC1810"; gene_id "ST4.03ch12:2077613-2082945C"; flanks "2078514-,2078242-"; structure "1^,2^"; splice_chain "2078477^,2078384^"; sources "Undefined,Undefined"; NMorMRNA "null"; degree "4"; dimension "2_2";
ST4.03ch12	as_event	2078242	2082704	-	transcript_id "StLNC0565,StLNC0127,StLNC1810"; gene_id "ST4.03ch12:2077613-2082945C"; flanks "2082704^,2078242-"; structure "1-2^3-4^,5-6^7-8^,5-6^7-9^"; splice_chain "2082618-2082554^2082466-2082429^,2078660-2078595^2078514-2078477^,2078660-2078595^2078514-2078384^"; sources "Undefined,Undefined,Undefined"; NMorMRNA "null"; degree "9"; dimension "3_3";
ST4.03ch12	as_event	27547362	27547491	-	transcript_id "StLNC0052,StLNC1921"; gene_id "ST4.03ch12:27545188-27547602C"; flanks "27547491^,27547362^"; structure "1-,2-"; splice_chain "27547442-,27547394-"; sources "Undefined,Undefined"; NMorMRNA "null"; degree "4"; dimension "2_2";
ST4.03ch12	as_event	27547355	27547547	-	transcript_id "StLNC1501,StLNC1735"; gene_id "ST4.03ch12:27545188-27547602C"; flanks "27547547[,27547355-"; structure "1^,2^3-4^"; splice_chain "27547500^,27547491^27547442-27547404^"; sources "Undefined,Undefined"; NMorMRNA "null"; degree "4"; dimension "2_2";
ST4.03ch12	as_event	27546990	27547442	-	transcript_id "StLNC1735,StLNC0052"; gene_id "ST4.03ch12:27545188-27547602C"; flanks "27547442-,27546990^"; structure "1^3-4^5-,2^6-"; splice_chain "27547404^27547355-27547329^27547088-,27547362^27547073-"; sources "Undefined,Undefined"; NMorMRNA "null"; degree "4"; dimension "2_2";
ST4.03ch12	as_event	27546990	27547491	-	transcript_id "StLNC1735,StLNC0052,StLNC1921"; gene_id "ST4.03ch12:27545188-27547602C"; flanks "27547491^,27546990^"; structure "1-2^5-6^7-,1-4^8-,3-4^8-"; splice_chain "27547442-27547404^27547355-27547329^27547088-,27547442-27547362^27547073-,27547394-27547362^27547073-"; sources "Undefined,Undefined,Undefined"; NMorMRNA "null"; degree "9"; dimension "3_3";
ST4.03ch12	as_event	27546990	27547547	-	transcript_id "StLNC1501,StLNC1735,StLNC0052"; gene_id "ST4.03ch12:27545188-27547602C"; flanks "27547547[,27546990^"; structure "1^6-7^8-,2^3-4^6-7^8-,2^3-5^9-"; splice_chain "27547500^27547355-27547329^27547088-,27547491^27547442-27547404^27547355-27547329^27547088-,27547491^27547442-27547362^27547073-"; sources "Undefined,Undefined,Undefined"; NMorMRNA "null"; degree "9"; dimension "3_3";
ST4.03ch12	as_event	45652913	45654424	-	transcript_id "StLNC2455,StLNC0032"; gene_id "ST4.03ch12:45652690-45655226C"; flanks "45654424-,45652913-"; structure "1^,2^"; splice_chain "45654360^,45654331^"; sources "Undefined,Undefined"; NMorMRNA "null"; degree "4"; dimension "2_2";
ST4.03ch12	as_event	45652913	45655033	-	transcript_id "StLNC2492,StLNC2455,StLNC0032"; gene_id "ST4.03ch12:45652690-45655226C"; flanks "45655033^,45652913-"; structure "0,1-2^,1-3^"; splice_chain ",45654424-45654360^,45654424-45654331^"; sources "Undefined,Undefined,Undefined"; NMorMRNA "null"; degree "9"; dimension "3_3";
ST4.03ch12	as_event	46974321	46974457	-	transcript_id "StLNC2832,StLNC1042,StLNC0965"; gene_id "ST4.03ch12:46973661-46979635C"; flanks "46974457-,46974321-"; structure "1^,2^,3^"; splice_chain "46974421^,46974419^,46974416^"; sources "Undefined,Undefined,Undefined"; NMorMRNA "null"; degree "9"; dimension "3_3";
ST4.03ch12	as_event	46974246	46974457	-	transcript_id "StLNC2290,StLNC2832,StLNC1042,StLNC0965"; gene_id "ST4.03ch12:46973661-46979635C"; flanks "46974457-,46974246^"; structure "0,1^4-,2^4-,3^4-"; splice_chain ",46974421^46974321-,46974419^46974321-,46974416^46974321-"; sources "Undefined,Undefined,Undefined,Undefined"; NMorMRNA "null"; degree "16"; dimension "4_4";
ST4.03ch12	as_event	55540552	55542243	-	transcript_id "StLNC2765,StLNC2293"; gene_id "ST4.03ch12:55523577-55542396C"; flanks "55542243^,55540552^"; structure "1-,2-"; splice_chain "55540805-,55540787-"; sources "Undefined,Undefined"; NMorMRNA "null"; degree "4"; dimension "2_2";
ST4.03ch12	as_event	59339306	59340034	-	transcript_id "StLNC1981,StLNC1841"; gene_id "ST4.03ch12:59336793-59340384C"; flanks "59340034-,59339306^"; structure "0,1^2-"; splice_chain ",59339956^59339364-"; sources "Undefined,Undefined"; NMorMRNA "null"; degree "4"; dimension "2_2";
ST4.03ch12	as_event	59337769	59340034	-	transcript_id "StLNC1841,StLNC1981,StLNC1779"; gene_id "ST4.03ch12:59336793-59340384C"; flanks "59340034-,59337769^"; structure "1^2-3^4-,3^4-,5^6-"; splice_chain "59339956^59339364-59339306^59339231-,59339306^59339231-,59339187^59337841-"; sources "Undefined,Undefined,Undefined"; NMorMRNA "null"; degree "9"; dimension "3_3";
ST4.03ch12	as_event	59337769	59340366	-	transcript_id "StLNC1325,StLNC1981"; gene_id "ST4.03ch12:59336793-59340384C"; flanks "59340366[,59337769^"; structure "0,1^2-3^4-"; splice_chain ",59340187^59340034-59339306^59339231-"; sources "Undefined,Undefined"; NMorMRNA "null"; degree "4"; dimension "2_2";
ST4.03ch12	as_event	59603009	59611478	-	transcript_id "StLNC1969,StLNC0515"; gene_id "ST4.03ch12:59593684-59613736C"; flanks "59611478[,59603009]"; structure "1^3-,2^4-"; splice_chain "59611134^59603194-,59611020^59603038-"; sources "Undefined,Undefined"; NMorMRNA "null"; degree "4"; dimension "2_2";
ST4.03ch12	as_event	59594535	59603451	-	transcript_id "StLNC2086,StLNC2084"; gene_id "ST4.03ch12:59593684-59613736C"; flanks "59603451[,59594535]"; structure "1^3-,2^4-"; splice_chain "59603304^59594677-,59603276^59594604-"; sources "Undefined,Undefined"; NMorMRNA "null"; degree "4"; dimension "2_2";
ST4.03ch12	as_event	59594120	59612256	-	transcript_id "StLNC0893,StLNC1158"; gene_id "ST4.03ch12:59593684-59613736C"; flanks "59612256-,59594120-"; structure "1^3-4^,2^"; splice_chain "59612194^59604185-59604117^,59612117^"; sources "Undefined,Undefined"; NMorMRNA "null"; degree "4"; dimension "2_2";
ST4.03ch12	as_event	59594042	59612075	-	transcript_id "StLNC1185,StLNC2686"; gene_id "ST4.03ch12:59593684-59613736C"; flanks "59612075^,59594042-"; structure "1-2^,3-4^"; splice_chain "59604110-59604075^,59604042-59604007^"; sources "Undefined,Undefined"; NMorMRNA "null"; degree "4"; dimension "2_2";
ST4.03ch12	as_event	59593688	59612256	-	transcript_id "StLNC0893,StLNC1158,StLNC2686"; gene_id "ST4.03ch12:59593684-59613736C"; flanks "59612256-,59593688]"; structure "1^4-5^8-,2^8-,3^6-7^9-"; splice_chain "59612194^59604185-59604117^59594120-,59612117^59594120-,59612075^59604042-59604007^59594042-"; sources "Undefined,Undefined,Undefined"; NMorMRNA "null"; degree "9"; dimension "3_3";
