# Supplementary material for: Genome-Wide Identification and Characterization of Potato Long Non-coding RNAs Associated With Phytophthora infestans Resistance
Source: Front Plant Sci. 2021 Feb 10;12:619062. doi: 10.3389/fpls.2021.619062 (PMC7902931; doi:10.3389/fpls.2021.619062)
Supplement: Supplementary Table 8 — Predicting the target genes of lncRNAs. [file Table_8.XLSX]

## Sheet: trans
lncRNA	Targets	pearson'r	pvalue	Target description
StLNC0001	PGSC0003DMT400077712	0.993357	0.000552215	SAUR family protein
StLNC1079	PGSC0003DMT400036477	0.989772	0.000153355	Non-LTR retroelement reverse transcriptase
StLNC1079	PGSC0003DMT400036477	0.989772	0.000153355	Non-LTR retroelement reverse transcriptase
StLNC1079	PGSC0003DMT400051979	0.980678	0.000550721	Mak
StLNC1079	PGSC0003DMT400051979	0.980678	0.000550721	Mak
StLNC1223	PGSC0003DMT400005865	0.988852	0.000182445	Gene of unknown function
StLNC0845	PGSC0003DMT400007434	0.988972	0.00017851	Sn-1 protein
StLNC0845	PGSC0003DMT400007434	0.988972	0.00017851	Sn-1 protein
StLNC0845	PGSC0003DMT400012368	0.982705	0.000440997	Conserved gene of unknown function
StLNC0845	PGSC0003DMT400012368	0.982705	0.000440997	Conserved gene of unknown function
StLNC0845	PGSC0003DMT400042629	0.98976	0.000153712	Thylakoid membrane phosphoprotein 14 kDa, chloroplast
StLNC0845	PGSC0003DMT400042629	0.98976	0.000153712	Thylakoid membrane phosphoprotein 14 kDa, chloroplast
StLNC0845	PGSC0003DMT400043828	0.987724	0.000221509	Gene of unknown function
StLNC0845	PGSC0003DMT400043828	0.987724	0.000221509	Gene of unknown function
StLNC0845	PGSC0003DMT400045802	0.995078	3.48e-05	MADS-box protein 15
StLNC0845	PGSC0003DMT400045802	0.995078	3.48e-05	MADS-box protein 15
StLNC0845	PGSC0003DMT400055636	0.99407	5.09e-05	U1 small nuclear ribonucleoprotein 70 kD
StLNC0845	PGSC0003DMT400055636	0.99407	5.09e-05	U1 small nuclear ribonucleoprotein 70 kD
StLNC0845	PGSC0003DMT400071820	0.980686	0.00055028	ER lumen retaining receptor family
StLNC0845	PGSC0003DMT400071820	0.980686	0.00055028	ER lumen retaining receptor family
StLNC1526	PGSC0003DMT400002890	0.984852	0.00033799	40S ribosomal protein S15
StLNC1526	PGSC0003DMT400002890	0.984852	0.00033799	40S ribosomal protein S15
StLNC1526	PGSC0003DMT400017098	0.982028	0.000476296	RelA-SpoT RSH1
StLNC1526	PGSC0003DMT400017098	0.982028	0.000476296	RelA-SpoT RSH1
StLNC1526	PGSC0003DMT400029528	0.988676	0.000188265	Phototropic-responsive NPH3 family protein
StLNC1526	PGSC0003DMT400029528	0.988676	0.000188265	Phototropic-responsive NPH3 family protein
StLNC1526	PGSC0003DMT400036771	0.983056	0.000423251	AAA-type ATPase family protein
StLNC1526	PGSC0003DMT400036771	0.983056	0.000423251	AAA-type ATPase family protein
StLNC1526	PGSC0003DMT400039730	0.980492	0.000561417	Conserved gene of unknown function
StLNC1526	PGSC0003DMT400039730	0.980492	0.000561417	Conserved gene of unknown function
StLNC1526	PGSC0003DMT400042248	0.981963	0.000479764	Conserved gene of unknown function
StLNC1526	PGSC0003DMT400042248	0.981963	0.000479764	Conserved gene of unknown function
StLNC1526	PGSC0003DMT400042325	0.982885	0.00043187	Isochorismatase
StLNC1526	PGSC0003DMT400042325	0.982885	0.00043187	Isochorismatase
StLNC1526	PGSC0003DMT400044855	0.986028	0.000287331	Ribulose-1,5 bisphosphate carboxylase/oxygenase large subunit N-methyltransferase, chloroplast
StLNC1526	PGSC0003DMT400044855	0.986028	0.000287331	Ribulose-1,5 bisphosphate carboxylase/oxygenase large subunit N-methyltransferase, chloroplast
StLNC1526	PGSC0003DMT400049606	0.984032	0.000375727	Conserved gene of unknown function
StLNC1526	PGSC0003DMT400049606	0.984032	0.000375727	Conserved gene of unknown function
StLNC1526	PGSC0003DMT400053017	0.98738	0.000234156	RNA binding protein
StLNC1526	PGSC0003DMT400053017	0.98738	0.000234156	RNA binding protein
StLNC1526	PGSC0003DMT400061700	0.981114	0.000526086	Chaperonin-60 beta subunit
StLNC1526	PGSC0003DMT400061700	0.981114	0.000526086	Chaperonin-60 beta subunit
StLNC1526	PGSC0003DMT400069452	0.987529	0.000228657	IS10 transposase
StLNC1526	PGSC0003DMT400069452	0.987529	0.000228657	IS10 transposase
StLNC1526	PGSC0003DMT400071626	0.98357	0.00039788	Translation initiation factor IF-2
StLNC1526	PGSC0003DMT400071626	0.98357	0.00039788	Translation initiation factor IF-2
StLNC1526	PGSC0003DMT400075590	0.984316	0.000362427	Nitrate transporter
StLNC1526	PGSC0003DMT400075590	0.984316	0.000362427	Nitrate transporter
StLNC1526	PGSC0003DMT400078112	0.995062	3.51e-05	Conserved gene of unknown function
StLNC1526	PGSC0003DMT400078112	0.995062	3.51e-05	Conserved gene of unknown function
StLNC1526	PGSC0003DMT400080606	0.984038	0.000375454	Ethylene response protein
StLNC1526	PGSC0003DMT400080606	0.984038	0.000375454	Ethylene response protein
StLNC1526	PGSC0003DMT400085903	0.981394	0.000510606	Conserved gene of unknown function
StLNC1526	PGSC0003DMT400085903	0.981394	0.000510606	Conserved gene of unknown function
StLNC1190	PGSC0003DMT400000295	0.984741	0.000342982	Pentatricopeptide repeat-containing protein, mitochondrial
StLNC1190	PGSC0003DMT400000295	0.984741	0.000342982	Pentatricopeptide repeat-containing protein, mitochondrial
StLNC1190	PGSC0003DMT400000299	0.987583	0.000226643	Gene of unknown function
StLNC1190	PGSC0003DMT400000299	0.987583	0.000226643	Gene of unknown function
StLNC1190	PGSC0003DMT400000859	0.989681	0.000156126	Conserved gene of unknown function
StLNC1190	PGSC0003DMT400000859	0.989681	0.000156126	Conserved gene of unknown function
StLNC1190	PGSC0003DMT400000946	0.98173	0.000492263	Arginyl-tRNA synthetase
StLNC1190	PGSC0003DMT400000946	0.98173	0.000492263	Arginyl-tRNA synthetase
StLNC1190	PGSC0003DMT400001077	0.981405	0.00050998	RNA processing factor 1
StLNC1190	PGSC0003DMT400001077	0.981405	0.00050998	RNA processing factor 1
StLNC1190	PGSC0003DMT400001470	0.988536	0.000192992	Pentatricopeptide repeat-containing protein
StLNC1190	PGSC0003DMT400001470	0.988536	0.000192992	Pentatricopeptide repeat-containing protein
StLNC1190	PGSC0003DMT400001530	0.99488	3.78e-05	Conserved gene of unknown function
StLNC1190	PGSC0003DMT400001530	0.99488	3.78e-05	Conserved gene of unknown function
StLNC1190	PGSC0003DMT400001555	0.992267	8.72e-05	DNA mismatch repair muts family protein
StLNC1190	PGSC0003DMT400001555	0.992267	8.72e-05	DNA mismatch repair muts family protein
StLNC1190	PGSC0003DMT400001865	0.987679	0.000223128	Transcription regulatory protein SWI3
StLNC1190	PGSC0003DMT400001865	0.987679	0.000223128	Transcription regulatory protein SWI3
StLNC1190	PGSC0003DMT400002375	0.984062	0.0003743	AP2/ERF domain-containing transcription factor
StLNC1190	PGSC0003DMT400002375	0.984062	0.0003743	AP2/ERF domain-containing transcription factor
StLNC1190	PGSC0003DMT400002933	0.980302	0.000572408	RuBisCO large subunit-binding protein subunit alpha, chloroplastic
StLNC1190	PGSC0003DMT400002933	0.980302	0.000572408	RuBisCO large subunit-binding protein subunit alpha, chloroplastic
StLNC1190	PGSC0003DMT400003414	0.980959	0.000534791	Mitochondrial saccharopine dehydrogenase
StLNC1190	PGSC0003DMT400003414	0.980959	0.000534791	Mitochondrial saccharopine dehydrogenase
StLNC1190	PGSC0003DMT400003784	0.986715	0.000259632	Auxin-responsive protein IAA13
StLNC1190	PGSC0003DMT400003784	0.986715	0.000259632	Auxin-responsive protein IAA13
StLNC1190	PGSC0003DMT400003794	0.983001	0.000426008	Conserved gene of unknown function
StLNC1190	PGSC0003DMT400003794	0.983001	0.000426008	Conserved gene of unknown function
StLNC1190	PGSC0003DMT400003893	0.985728	0.000299892	Conserved gene of unknown function
StLNC1190	PGSC0003DMT400003893	0.985728	0.000299892	Conserved gene of unknown function
StLNC1190	PGSC0003DMT400003907	0.988642	0.000189403	Conserved gene of unknown function
StLNC1190	PGSC0003DMT400003907	0.988642	0.000189403	Conserved gene of unknown function
StLNC1190	PGSC0003DMT400004063	0.982175	0.0004685	Conserved gene of unknown function
StLNC1190	PGSC0003DMT400004063	0.982175	0.0004685	Conserved gene of unknown function
StLNC1190	PGSC0003DMT400004400	0.980419	0.000565618	Vitellogenic carboxypeptidase
StLNC1190	PGSC0003DMT400004400	0.980419	0.000565618	Vitellogenic carboxypeptidase
StLNC1190	PGSC0003DMT400006346	0.981709	0.000493429	Developmentally regulated GTP-binding protein
StLNC1190	PGSC0003DMT400006346	0.981709	0.000493429	Developmentally regulated GTP-binding protein
StLNC1190	PGSC0003DMT400006421	0.980441	0.000564361	Zinc finger protein
StLNC1190	PGSC0003DMT400006421	0.980441	0.000564361	Zinc finger protein
StLNC1190	PGSC0003DMT400007024	0.988476	0.000195019	Gene of unknown function
StLNC1190	PGSC0003DMT400007024	0.988476	0.000195019	Gene of unknown function
StLNC1190	PGSC0003DMT400007325	0.985252	0.00032032	Eukaryotic translation initiation factor 5A-4
StLNC1190	PGSC0003DMT400007325	0.985252	0.00032032	Eukaryotic translation initiation factor 5A-4
StLNC1190	PGSC0003DMT400007434	0.980311	0.000571887	Sn-1 protein
StLNC1190	PGSC0003DMT400007434	0.980311	0.000571887	Sn-1 protein
StLNC1190	PGSC0003DMT400007737	0.985551	0.00030741	Regulator of gene silencing
StLNC1190	PGSC0003DMT400007737	0.985551	0.00030741	Regulator of gene silencing
StLNC1190	PGSC0003DMT400007742	0.984833	0.000338827	Cellular nucleic acid binding protein
StLNC1190	PGSC0003DMT400007742	0.984833	0.000338827	Cellular nucleic acid binding protein
StLNC1190	PGSC0003DMT400007759	0.98127	0.000517443	Conserved gene of unknown function
StLNC1190	PGSC0003DMT400007759	0.98127	0.000517443	Conserved gene of unknown function
StLNC1190	PGSC0003DMT400008560	0.990876	0.000121805	F-box protein GID2
StLNC1190	PGSC0003DMT400008560	0.990876	0.000121805	F-box protein GID2
StLNC1190	PGSC0003DMT400008581	0.99005	0.00014506	Conserved gene of unknown function
StLNC1190	PGSC0003DMT400008581	0.99005	0.00014506	Conserved gene of unknown function
StLNC1190	PGSC0003DMT400009420	0.980415	0.000565873	Amine oxidase
StLNC1190	PGSC0003DMT400009420	0.980415	0.000565873	Amine oxidase
StLNC1190	PGSC0003DMT400009713	0.980249	0.000575528	Conserved gene of unknown function
StLNC1190	PGSC0003DMT400009713	0.980249	0.000575528	Conserved gene of unknown function
StLNC1190	PGSC0003DMT400010000	0.988115	0.000207547	Acc synthase
StLNC1190	PGSC0003DMT400010000	0.988115	0.000207547	Acc synthase
StLNC1190	PGSC0003DMT400010008	0.988601	0.000190805	Conserved gene of unknown function
StLNC1190	PGSC0003DMT400010008	0.988601	0.000190805	Conserved gene of unknown function
StLNC1190	PGSC0003DMT400011470	0.988468	0.000195307	BRASSINAZOLE-RESISTANT 1 protein
StLNC1190	PGSC0003DMT400011470	0.988468	0.000195307	BRASSINAZOLE-RESISTANT 1 protein
StLNC1190	PGSC0003DMT400012368	0.98	0.000590125	Conserved gene of unknown function
StLNC1190	PGSC0003DMT400012368	0.98	0.000590125	Conserved gene of unknown function
StLNC1190	PGSC0003DMT400012849	0.996802	1.44e-05	RING-H2 finger protein RHG1a
StLNC1190	PGSC0003DMT400012849	0.996802	1.44e-05	RING-H2 finger protein RHG1a
StLNC1190	PGSC0003DMT400012873	0.982062	0.000474494	Crooked neck protein
StLNC1190	PGSC0003DMT400012873	0.982062	0.000474494	Crooked neck protein
StLNC1190	PGSC0003DMT400013036	0.983708	0.000391181	Nuclear acid binding protein
StLNC1190	PGSC0003DMT400013036	0.983708	0.000391181	Nuclear acid binding protein
StLNC1190	PGSC0003DMT400014351	0.986697	0.000260363	Conserved gene of unknown function
StLNC1190	PGSC0003DMT400014351	0.986697	0.000260363	Conserved gene of unknown function
StLNC1190	PGSC0003DMT400014362	0.984134	0.000370931	Conserved gene of unknown function
StLNC1190	PGSC0003DMT400014362	0.984134	0.000370931	Conserved gene of unknown function
StLNC1190	PGSC0003DMT400014493	0.981969	0.000479468	Geranylgeranyl transferase type II beta subunit
StLNC1190	PGSC0003DMT400014493	0.981969	0.000479468	Geranylgeranyl transferase type II beta subunit
StLNC1190	PGSC0003DMT400014744	0.985289	0.000318713	Spliceosome associated protein
StLNC1190	PGSC0003DMT400014744	0.985289	0.000318713	Spliceosome associated protein
StLNC1190	PGSC0003DMT400015910	0.983963	0.000379018	Conserved gene of unknown function
StLNC1190	PGSC0003DMT400015910	0.983963	0.000379018	Conserved gene of unknown function
StLNC1190	PGSC0003DMT400015931	0.985922	0.000291728	Gene of unknown function
StLNC1190	PGSC0003DMT400015931	0.985922	0.000291728	Gene of unknown function
StLNC1190	PGSC0003DMT400016998	0.981562	0.000501401	Spotted leaf protein
StLNC1190	PGSC0003DMT400016998	0.981562	0.000501401	Spotted leaf protein
StLNC1190	PGSC0003DMT400017590	0.983389	0.000406706	F-box family protein
StLNC1190	PGSC0003DMT400017590	0.983389	0.000406706	F-box family protein
StLNC1190	PGSC0003DMT400020315	0.982873	0.000432437	Ribosomal protein L11
StLNC1190	PGSC0003DMT400020315	0.982873	0.000432437	Ribosomal protein L11
StLNC1190	PGSC0003DMT400020650	0.990334	0.000136826	DCL protein
StLNC1190	PGSC0003DMT400020650	0.990334	0.000136826	DCL protein
StLNC1190	PGSC0003DMT400020825	0.983353	0.000408486	Bel1 homeotic protein
StLNC1190	PGSC0003DMT400020825	0.983353	0.000408486	Bel1 homeotic protein
StLNC1190	PGSC0003DMT400021142	0.98894	0.000179528	Class II small heat shock protein Le-HSP17.6
StLNC1190	PGSC0003DMT400021142	0.98894	0.000179528	Class II small heat shock protein Le-HSP17.6
StLNC1190	PGSC0003DMT400022096	0.99537	3.07e-05	Integral membrane single C2 domain protein
StLNC1190	PGSC0003DMT400022096	0.99537	3.07e-05	Integral membrane single C2 domain protein
StLNC1190	PGSC0003DMT400022169	0.986212	0.000279804	Conserved gene of unknown function
StLNC1190	PGSC0003DMT400022169	0.986212	0.000279804	Conserved gene of unknown function
StLNC1190	PGSC0003DMT400022353	0.982609	0.000445943	RNA polymerase II transcriptional coactivator KIWI
StLNC1190	PGSC0003DMT400022353	0.982609	0.000445943	RNA polymerase II transcriptional coactivator KIWI
StLNC1190	PGSC0003DMT400022377	0.980502	0.000560858	Protein kinase
StLNC1190	PGSC0003DMT400022377	0.980502	0.000560858	Protein kinase
StLNC1190	PGSC0003DMT400022899	0.984047	0.000375042	Conserved gene of unknown function
StLNC1190	PGSC0003DMT400022899	0.984047	0.000375042	Conserved gene of unknown function
StLNC1190	PGSC0003DMT400023016	0.983041	0.000423961	Metallothionein
StLNC1190	PGSC0003DMT400023016	0.983041	0.000423961	Metallothionein
StLNC1190	PGSC0003DMT400023075	0.989559	0.000159855	Spliceosome associated protein
StLNC1190	PGSC0003DMT400023075	0.989559	0.000159855	Spliceosome associated protein
StLNC1190	PGSC0003DMT400024508	0.982992	0.000426449	Dehydration-responsive element binding protein 3
StLNC1190	PGSC0003DMT400024508	0.982992	0.000426449	Dehydration-responsive element binding protein 3
StLNC1190	PGSC0003DMT400024580	0.981898	0.00048326	Conserved gene of unknown function
StLNC1190	PGSC0003DMT400024580	0.981898	0.00048326	Conserved gene of unknown function
StLNC1190	PGSC0003DMT400025712	0.98784	0.000217327	Conserved gene of unknown function
StLNC1190	PGSC0003DMT400025712	0.98784	0.000217327	Conserved gene of unknown function
StLNC1190	PGSC0003DMT400026377	0.980172	0.000580012	DNA-binding protein RHL1
StLNC1190	PGSC0003DMT400026377	0.980172	0.000580012	DNA-binding protein RHL1
StLNC1190	PGSC0003DMT400027542	0.986079	0.000285234	E3 ubiquitin ligase PUB14
StLNC1190	PGSC0003DMT400027542	0.986079	0.000285234	E3 ubiquitin ligase PUB14
StLNC1190	PGSC0003DMT400027645	0.988426	0.000196747	Conserved gene of unknown function
StLNC1190	PGSC0003DMT400027645	0.988426	0.000196747	Conserved gene of unknown function
StLNC1190	PGSC0003DMT400027828	0.982378	0.000457873	Salt responsive protein 2
StLNC1190	PGSC0003DMT400027828	0.982378	0.000457873	Salt responsive protein 2
StLNC1190	PGSC0003DMT400028574	0.989963	0.000147629	Structural constituent of ribosome
StLNC1190	PGSC0003DMT400028574	0.989963	0.000147629	Structural constituent of ribosome
StLNC1190	PGSC0003DMT400028767	0.986359	0.000273811	Ribulose bisphosphate carboxylase/oxygenase activase 1, chloroplastic
StLNC1190	PGSC0003DMT400028767	0.986359	0.000273811	Ribulose bisphosphate carboxylase/oxygenase activase 1, chloroplastic
StLNC1190	PGSC0003DMT400029793	0.987353	0.000235187	Hsp90 co-chaperone AHA1
StLNC1190	PGSC0003DMT400029793	0.987353	0.000235187	Hsp90 co-chaperone AHA1
StLNC1190	PGSC0003DMT400030174	0.985168	0.000324	Conserved gene of unknown function
StLNC1190	PGSC0003DMT400030174	0.985168	0.000324	Conserved gene of unknown function
StLNC1190	PGSC0003DMT400030260	0.987057	0.000246375	F-box family protein
StLNC1190	PGSC0003DMT400030260	0.987057	0.000246375	F-box family protein
StLNC1190	PGSC0003DMT400030387	0.980322	0.000571223	Chloroplast small heat shock protein class I
StLNC1190	PGSC0003DMT400030387	0.980322	0.000571223	Chloroplast small heat shock protein class I
StLNC1190	PGSC0003DMT400030727	0.988023	0.000210783	Amino acid transporter
StLNC1190	PGSC0003DMT400030727	0.988023	0.000210783	Amino acid transporter
StLNC1190	PGSC0003DMT400031401	0.995289	3.19e-05	APETALA2
StLNC1190	PGSC0003DMT400031401	0.995289	3.19e-05	APETALA2
StLNC1190	PGSC0003DMT400032059	0.985832	0.000295492	Ubiquitin carrier protein
StLNC1190	PGSC0003DMT400032059	0.985832	0.000295492	Ubiquitin carrier protein
StLNC1190	PGSC0003DMT400032275	0.991388	0.000108387	Conserved gene of unknown function
StLNC1190	PGSC0003DMT400032275	0.991388	0.000108387	Conserved gene of unknown function
StLNC1190	PGSC0003DMT400032710	0.984855	0.000337867	Gene of unknown function
StLNC1190	PGSC0003DMT400032710	0.984855	0.000337867	Gene of unknown function
StLNC1190	PGSC0003DMT400032993	0.985793	0.000297133	Gene of unknown function
StLNC1190	PGSC0003DMT400032993	0.985793	0.000297133	Gene of unknown function
StLNC1190	PGSC0003DMT400033013	0.988152	0.000206227	ABA induced plasma membrane protein PM 19
StLNC1190	PGSC0003DMT400033013	0.988152	0.000206227	ABA induced plasma membrane protein PM 19
StLNC1190	PGSC0003DMT400033081	0.981455	0.000507227	U4/U6 small nuclear ribonucleoprotein Prp4
StLNC1190	PGSC0003DMT400033081	0.981455	0.000507227	U4/U6 small nuclear ribonucleoprotein Prp4
StLNC1190	PGSC0003DMT400033708	0.988665	0.00018864	Gene of unknown function
StLNC1190	PGSC0003DMT400033708	0.988665	0.00018864	Gene of unknown function
StLNC1190	PGSC0003DMT400034192	0.986714	0.000259673	Ripening induced protein
StLNC1190	PGSC0003DMT400034192	0.986714	0.000259673	Ripening induced protein
StLNC1190	PGSC0003DMT400034522	0.985612	0.000304806	Glycinamide ribonucleotide transformylase
StLNC1190	PGSC0003DMT400034522	0.985612	0.000304806	Glycinamide ribonucleotide transformylase
StLNC1190	PGSC0003DMT400034911	0.980301	0.000572458	Translation initiation factor eIF4E
StLNC1190	PGSC0003DMT400034911	0.980301	0.000572458	Translation initiation factor eIF4E
StLNC1190	PGSC0003DMT400035450	0.988681	0.00018811	RWP-RK domain-containing protein
StLNC1190	PGSC0003DMT400035450	0.988681	0.00018811	RWP-RK domain-containing protein
StLNC1190	PGSC0003DMT400035603	0.991114	0.000115453	Conserved gene of unknown function
StLNC1190	PGSC0003DMT400035603	0.991114	0.000115453	Conserved gene of unknown function
StLNC1190	PGSC0003DMT400036094	0.984851	0.000338039	Dual specificity protein phosphatase
StLNC1190	PGSC0003DMT400036094	0.984851	0.000338039	Dual specificity protein phosphatase
StLNC1190	PGSC0003DMT400036145	0.987813	0.000218297	Receptor serine-threonine protein kinase
StLNC1190	PGSC0003DMT400036145	0.987813	0.000218297	Receptor serine-threonine protein kinase
StLNC1190	PGSC0003DMT400036990	0.991881	9.62e-05	Acireductone dioxygenase
StLNC1190	PGSC0003DMT400036990	0.991881	9.62e-05	Acireductone dioxygenase
StLNC1190	PGSC0003DMT400036997	0.983436	0.000404395	Conserved gene of unknown function
StLNC1190	PGSC0003DMT400036997	0.983436	0.000404395	Conserved gene of unknown function
StLNC1190	PGSC0003DMT400038147	0.986997	0.000248679	Nucleotide binding protein
StLNC1190	PGSC0003DMT400038147	0.986997	0.000248679	Nucleotide binding protein
StLNC1190	PGSC0003DMT400039303	0.991173	0.000113924	Histone acetyltransferase
StLNC1190	PGSC0003DMT400039303	0.991173	0.000113924	Histone acetyltransferase
StLNC1190	PGSC0003DMT400041612	0.986495	0.000268381	Suppressor
StLNC1190	PGSC0003DMT400041612	0.986495	0.000268381	Suppressor
StLNC1190	PGSC0003DMT400042331	0.981745	0.000491461	Gene of unknown function
StLNC1190	PGSC0003DMT400042331	0.981745	0.000491461	Gene of unknown function
StLNC1190	PGSC0003DMT400042650	0.988909	0.000180569	Kelch repeat-containing F-box family protein
StLNC1190	PGSC0003DMT400042650	0.988909	0.000180569	Kelch repeat-containing F-box family protein
StLNC1190	PGSC0003DMT400044280	0.981417	0.000509344	Pre-mRNA-splicing factor
StLNC1190	PGSC0003DMT400044280	0.981417	0.000509344	Pre-mRNA-splicing factor
StLNC1190	PGSC0003DMT400045722	0.988985	0.000178089	FtsH protease
StLNC1190	PGSC0003DMT400045722	0.988985	0.000178089	FtsH protease
StLNC1190	PGSC0003DMT400045765	0.982536	0.000449679	Conserved gene of unknown function
StLNC1190	PGSC0003DMT400045765	0.982536	0.000449679	Conserved gene of unknown function
StLNC1190	PGSC0003DMT400045783	0.985217	0.000321851	Cytochrome C oxidase polypeptide vib
StLNC1190	PGSC0003DMT400045783	0.985217	0.000321851	Cytochrome C oxidase polypeptide vib
StLNC1190	PGSC0003DMT400046729	0.983359	0.000408193	Enzyme inhibitor
StLNC1190	PGSC0003DMT400046729	0.983359	0.000408193	Enzyme inhibitor
StLNC1190	PGSC0003DMT400047369	0.981204	0.000521116	Zinc finger protein
StLNC1190	PGSC0003DMT400047369	0.981204	0.000521116	Zinc finger protein
StLNC1190	PGSC0003DMT400047537	0.982805	0.00043592	ABA 8'-hydroxylase CYP707A1
StLNC1190	PGSC0003DMT400047537	0.982805	0.00043592	ABA 8'-hydroxylase CYP707A1
StLNC1190	PGSC0003DMT400048186	0.984634	0.000347831	Ribosomal protein L7/L12 C-terminal domain containing protein
StLNC1190	PGSC0003DMT400048186	0.984634	0.000347831	Ribosomal protein L7/L12 C-terminal domain containing protein
StLNC1190	PGSC0003DMT400048756	0.987396	0.000233568	Phytochrome-interacting factor
StLNC1190	PGSC0003DMT400048756	0.987396	0.000233568	Phytochrome-interacting factor
StLNC1190	PGSC0003DMT400049928	0.993137	6.85e-05	24 kDa seed maturation protein
StLNC1190	PGSC0003DMT400049928	0.993137	6.85e-05	24 kDa seed maturation protein
StLNC1190	PGSC0003DMT400050534	0.990665	0.000127557	Chaperonin containing t-complex protein 1, beta subunit, tcpb
StLNC1190	PGSC0003DMT400050534	0.990665	0.000127557	Chaperonin containing t-complex protein 1, beta subunit, tcpb
StLNC1190	PGSC0003DMT400053070	0.983347	0.000408794	Rpi-vnt1
StLNC1190	PGSC0003DMT400053070	0.983347	0.000408794	Rpi-vnt1
StLNC1190	PGSC0003DMT400053577	0.995428	2.9997e-05	Conserved gene of unknown function
StLNC1190	PGSC0003DMT400053577	0.995428	2.9997e-05	Conserved gene of unknown function
StLNC1190	PGSC0003DMT400054127	0.992705	7.75e-05	Conserved gene of unknown function
StLNC1190	PGSC0003DMT400054127	0.992705	7.75e-05	Conserved gene of unknown function
StLNC1190	PGSC0003DMT400055413	0.980428	0.000565075	Gene of unknown function
StLNC1190	PGSC0003DMT400055413	0.980428	0.000565075	Gene of unknown function
StLNC1190	PGSC0003DMT400055766	0.991471	0.000106282	Conserved gene of unknown function
StLNC1190	PGSC0003DMT400055766	0.991471	0.000106282	Conserved gene of unknown function
StLNC1190	PGSC0003DMT400055930	0.993332	6.46e-05	Furin
StLNC1190	PGSC0003DMT400055930	0.993332	6.46e-05	Furin
StLNC1190	PGSC0003DMT400055958	0.98781	0.000218403	Class II small heat shock protein Le-HSP17.6
StLNC1190	PGSC0003DMT400055958	0.98781	0.000218403	Class II small heat shock protein Le-HSP17.6
StLNC1190	PGSC0003DMT400057317	0.988346	0.000199491	Oleosin 5
StLNC1190	PGSC0003DMT400057317	0.988346	0.000199491	Oleosin 5
StLNC1190	PGSC0003DMT400057654	0.992713	7.73e-05	TSJT1
StLNC1190	PGSC0003DMT400057654	0.992713	7.73e-05	TSJT1
StLNC1190	PGSC0003DMT400058309	0.980785	0.00054462	Reductase 2
StLNC1190	PGSC0003DMT400058309	0.980785	0.00054462	Reductase 2
StLNC1190	PGSC0003DMT400059978	0.990741	0.000125448	MT-A70 family protein
StLNC1190	PGSC0003DMT400059978	0.990741	0.000125448	MT-A70 family protein
StLNC1190	PGSC0003DMT400060724	0.986715	0.00025964	Universal stress protein family protein
StLNC1190	PGSC0003DMT400060724	0.986715	0.00025964	Universal stress protein family protein
StLNC1190	PGSC0003DMT400060736	0.99791	5.94e-06	Peroxisomal small heat shock protein
StLNC1190	PGSC0003DMT400060736	0.99791	5.94e-06	Peroxisomal small heat shock protein
StLNC1190	PGSC0003DMT400060759	0.994875	3.78e-05	ATP-dependent RNA helicase
StLNC1190	PGSC0003DMT400060759	0.994875	3.78e-05	ATP-dependent RNA helicase
StLNC1190	PGSC0003DMT400061067	0.986066	0.000285779	Ankyrin domain protein
StLNC1190	PGSC0003DMT400061067	0.986066	0.000285779	Ankyrin domain protein
StLNC1190	PGSC0003DMT400061164	0.981509	0.000504294	Armadillo repeat-containing protein
StLNC1190	PGSC0003DMT400061164	0.981509	0.000504294	Armadillo repeat-containing protein
StLNC1190	PGSC0003DMT400062926	0.984853	0.00033797	IS10 transposase
StLNC1190	PGSC0003DMT400062926	0.984853	0.00033797	IS10 transposase
StLNC1190	PGSC0003DMT400063132	0.9804	0.000566744	Eukaryotic translation initiation factor 5A-5
StLNC1190	PGSC0003DMT400063132	0.9804	0.000566744	Eukaryotic translation initiation factor 5A-5
StLNC1190	PGSC0003DMT400063352	0.988326	0.000200195	101 kDa heat shock protein
StLNC1190	PGSC0003DMT400063352	0.988326	0.000200195	101 kDa heat shock protein
StLNC1190	PGSC0003DMT400063543	0.98652	0.000267366	Luminal binding protein
StLNC1190	PGSC0003DMT400063543	0.98652	0.000267366	Luminal binding protein
StLNC1190	PGSC0003DMT400063955	0.981961	0.000479869	F-box protein SKP2A
StLNC1190	PGSC0003DMT400063955	0.981961	0.000479869	F-box protein SKP2A
StLNC1190	PGSC0003DMT400064080	0.994329	4.65e-05	Ubiquitin family protein
StLNC1190	PGSC0003DMT400064080	0.994329	4.65e-05	Ubiquitin family protein
StLNC1190	PGSC0003DMT400065063	0.98723	0.000239782	L-idonate 5-dehydrogenase
StLNC1190	PGSC0003DMT400065063	0.98723	0.000239782	L-idonate 5-dehydrogenase
StLNC1190	PGSC0003DMT400066123	0.98702	0.000247802	Sterol regulatory element-binding protein site 2 protease
StLNC1190	PGSC0003DMT400066123	0.98702	0.000247802	Sterol regulatory element-binding protein site 2 protease
StLNC1190	PGSC0003DMT400066352	0.980471	0.000562598	Conserved gene of unknown function
StLNC1190	PGSC0003DMT400066352	0.980471	0.000562598	Conserved gene of unknown function
StLNC1190	PGSC0003DMT400066532	0.985566	0.000306743	Seed maturation protein PM23
StLNC1190	PGSC0003DMT400066532	0.985566	0.000306743	Seed maturation protein PM23
StLNC1190	PGSC0003DMT400066536	0.99236	8.51e-05	C2H2L domain class transcription factor
StLNC1190	PGSC0003DMT400066536	0.99236	8.51e-05	C2H2L domain class transcription factor
StLNC1190	PGSC0003DMT400066765	0.989856	0.000150834	Glycine-rich protein
StLNC1190	PGSC0003DMT400066765	0.989856	0.000150834	Glycine-rich protein
StLNC1190	PGSC0003DMT400067485	0.981368	0.00051203	HOS1
StLNC1190	PGSC0003DMT400067485	0.981368	0.00051203	HOS1
StLNC1190	PGSC0003DMT400067526	0.983311	0.000410561	Phospholipase A1
StLNC1190	PGSC0003DMT400067526	0.983311	0.000410561	Phospholipase A1
StLNC1190	PGSC0003DMT400068108	0.994126	4.99e-05	Glutamine-rich protein
StLNC1190	PGSC0003DMT400068108	0.994126	4.99e-05	Glutamine-rich protein
StLNC1190	PGSC0003DMT400068281	0.983547	0.000399002	G10
StLNC1190	PGSC0003DMT400068281	0.983547	0.000399002	G10
StLNC1190	PGSC0003DMT400068320	0.991293	0.000110812	Protein bem46
StLNC1190	PGSC0003DMT400068320	0.991293	0.000110812	Protein bem46
StLNC1190	PGSC0003DMT400068378	0.982471	0.000453048	Conserved gene of unknown function
StLNC1190	PGSC0003DMT400068378	0.982471	0.000453048	Conserved gene of unknown function
StLNC1190	PGSC0003DMT400068507	0.980773	0.000545328	GRAS5
StLNC1190	PGSC0003DMT400068507	0.980773	0.000545328	GRAS5
StLNC1190	PGSC0003DMT400068726	0.98499	0.000331855	SKP1 3
StLNC1190	PGSC0003DMT400068726	0.98499	0.000331855	SKP1 3
StLNC1190	PGSC0003DMT400069308	0.990057	0.000144879	Protein kinase
StLNC1190	PGSC0003DMT400069308	0.990057	0.000144879	Protein kinase
StLNC1190	PGSC0003DMT400069476	0.983697	0.000391709	Protein farnesyltransferase/geranylgeranyltransferase type-1 subunit alpha
StLNC1190	PGSC0003DMT400069476	0.983697	0.000391709	Protein farnesyltransferase/geranylgeranyltransferase type-1 subunit alpha
StLNC1190	PGSC0003DMT400069760	0.983711	0.000391056	Phosphoinositide-specific phospholipase C
StLNC1190	PGSC0003DMT400069760	0.983711	0.000391056	Phosphoinositide-specific phospholipase C
StLNC1190	PGSC0003DMT400071229	0.98365	0.000394002	Auxin:hydrogen symporter
StLNC1190	PGSC0003DMT400071229	0.98365	0.000394002	Auxin:hydrogen symporter
StLNC1190	PGSC0003DMT400071759	0.987577	0.000226865	Gene of unknown function
StLNC1190	PGSC0003DMT400071759	0.987577	0.000226865	Gene of unknown function
StLNC1190	PGSC0003DMT400071820	0.9803	0.00057256	ER lumen retaining receptor family
StLNC1190	PGSC0003DMT400071820	0.9803	0.00057256	ER lumen retaining receptor family
StLNC1190	PGSC0003DMT400072555	0.99758	8.07e-06	Mal d 1-associated protein
StLNC1190	PGSC0003DMT400072555	0.99758	8.07e-06	Mal d 1-associated protein
StLNC1190	PGSC0003DMT400072815	0.993658	5.83e-05	Gene of unknown function
StLNC1190	PGSC0003DMT400072815	0.993658	5.83e-05	Gene of unknown function
StLNC1190	PGSC0003DMT400073144	0.987186	0.000241482	Conserved gene of unknown function
StLNC1190	PGSC0003DMT400073144	0.987186	0.000241482	Conserved gene of unknown function
StLNC1190	PGSC0003DMT400073501	0.987496	0.000229873	Gibberellin receptor GID1
StLNC1190	PGSC0003DMT400073501	0.987496	0.000229873	Gibberellin receptor GID1
StLNC1190	PGSC0003DMT400074141	0.985534	0.000308103	Glycine rich protein-interacting protein
StLNC1190	PGSC0003DMT400074141	0.985534	0.000308103	Glycine rich protein-interacting protein
StLNC1190	PGSC0003DMT400075614	0.987115	0.00024418	Conserved gene of unknown function
StLNC1190	PGSC0003DMT400075614	0.987115	0.00024418	Conserved gene of unknown function
StLNC1190	PGSC0003DMT400076858	0.984316	0.000362443	Cytochrome P450 hydroxylase
StLNC1190	PGSC0003DMT400076858	0.984316	0.000362443	Cytochrome P450 hydroxylase
StLNC1190	PGSC0003DMT400076932	0.983196	0.000416235	GRAS9
StLNC1190	PGSC0003DMT400076932	0.983196	0.000416235	GRAS9
StLNC1190	PGSC0003DMT400078007	0.988196	0.000204683	17.6 kD class I small heat shock protein
StLNC1190	PGSC0003DMT400078007	0.988196	0.000204683	17.6 kD class I small heat shock protein
StLNC1190	PGSC0003DMT400078745	0.980498	0.000561057	DNA ligase
StLNC1190	PGSC0003DMT400078745	0.980498	0.000561057	DNA ligase
StLNC1190	PGSC0003DMT400079121	0.983448	0.000403821	MRNA, clone: RAFL25-31-I24
StLNC1190	PGSC0003DMT400079121	0.983448	0.000403821	MRNA, clone: RAFL25-31-I24
StLNC1190	PGSC0003DMT400079207	0.982239	0.000465158	Phi-1 protein
StLNC1190	PGSC0003DMT400079207	0.982239	0.000465158	Phi-1 protein
StLNC1190	PGSC0003DMT400079208	0.981847	0.000485965	Phi-1 protein
StLNC1190	PGSC0003DMT400079208	0.981847	0.000485965	Phi-1 protein
StLNC1190	PGSC0003DMT400079887	0.991239	0.000112206	3-hydroxyisobutyrate dehydrogenase
StLNC1190	PGSC0003DMT400079887	0.991239	0.000112206	3-hydroxyisobutyrate dehydrogenase
StLNC1190	PGSC0003DMT400080573	0.983304	0.000410891	Ankyrin repeat-containing protein
StLNC1190	PGSC0003DMT400080573	0.983304	0.000410891	Ankyrin repeat-containing protein
StLNC1190	PGSC0003DMT400080800	0.989485	0.000162167	Leucine-rich repeat family protein
StLNC1190	PGSC0003DMT400080800	0.989485	0.000162167	Leucine-rich repeat family protein
StLNC1190	PGSC0003DMT400081223	0.984684	0.000345571	Protein SIS1
StLNC1190	PGSC0003DMT400081223	0.984684	0.000345571	Protein SIS1
StLNC1190	PGSC0003DMT400081478	0.985146	0.000324944	Stress-associated protein 3
StLNC1190	PGSC0003DMT400081478	0.985146	0.000324944	Stress-associated protein 3
StLNC1190	PGSC0003DMT400081752	0.986888	0.000252886	Conserved gene of unknown function
StLNC1190	PGSC0003DMT400081752	0.986888	0.000252886	Conserved gene of unknown function
StLNC1190	PGSC0003DMT400081754	0.991032	0.000117635	RRNA methylase
StLNC1190	PGSC0003DMT400081754	0.991032	0.000117635	RRNA methylase
StLNC1190	PGSC0003DMT400083079	0.994447	4.45e-05	EMB514
StLNC1190	PGSC0003DMT400083079	0.994447	4.45e-05	EMB514
StLNC1190	PGSC0003DMT400083733	0.981202	0.000521215	Leucoanthocyanidin dioxygenase
StLNC1190	PGSC0003DMT400083733	0.981202	0.000521215	Leucoanthocyanidin dioxygenase
StLNC1190	PGSC0003DMT400084737	0.980218	0.000577292	Conserved gene of unknown function
StLNC1190	PGSC0003DMT400084737	0.980218	0.000577292	Conserved gene of unknown function
StLNC1190	PGSC0003DMT400084960	0.982249	0.000464634	Leucine-rich repeat receptor kinase PEPR2
StLNC1190	PGSC0003DMT400084960	0.982249	0.000464634	Leucine-rich repeat receptor kinase PEPR2
StLNC1190	PGSC0003DMT400085903	0.985648	0.000303275	Conserved gene of unknown function
StLNC1190	PGSC0003DMT400085903	0.985648	0.000303275	Conserved gene of unknown function
StLNC1190	PGSC0003DMT400091458	0.982003	0.000477645	Bcl-2-associated athanogene
StLNC1190	PGSC0003DMT400091458	0.982003	0.000477645	Bcl-2-associated athanogene
StLNC1190	PGSC0003DMT400093269	0.980186	0.000579208	Conserved gene of unknown function
StLNC1190	PGSC0003DMT400093269	0.980186	0.000579208	Conserved gene of unknown function
StLNC1190	PGSC0003DMT400094318	0.980743	0.000547013	Avr9/Cf-9 rapidly elicited protein 65
StLNC1190	PGSC0003DMT400094318	0.980743	0.000547013	Avr9/Cf-9 rapidly elicited protein 65
StLNC1190	PGSC0003DMT400097756	0.984425	0.00035741	Structural constituent of cell wall
StLNC1190	PGSC0003DMT400097756	0.984425	0.00035741	Structural constituent of cell wall
StLNC1114	PGSC0003DMT400003958	0.982888	0.000431695	Transporter
StLNC1114	PGSC0003DMT400003958	0.982888	0.000431695	Transporter
StLNC1114	PGSC0003DMT400004442	0.984401	0.000358524	Lectin receptor kinase
StLNC1114	PGSC0003DMT400004442	0.984401	0.000358524	Lectin receptor kinase
StLNC1114	PGSC0003DMT400013650	0.982467	0.000453285	Truncated NBS-LRR resistance protein
StLNC1114	PGSC0003DMT400013650	0.982467	0.000453285	Truncated NBS-LRR resistance protein
StLNC1114	PGSC0003DMT400017646	0.984751	0.000342544	Ribosomal protein
StLNC1114	PGSC0003DMT400017646	0.984751	0.000342544	Ribosomal protein
StLNC1114	PGSC0003DMT400026671	0.982812	0.000435555	Ferredoxin
StLNC1114	PGSC0003DMT400026671	0.982812	0.000435555	Ferredoxin
StLNC1114	PGSC0003DMT400026957	0.983418	0.000405303	Silencing group A protein
StLNC1114	PGSC0003DMT400026957	0.983418	0.000405303	Silencing group A protein
StLNC1114	PGSC0003DMT400030540	0.982358	0.000458922	Gene of unknown function
StLNC1114	PGSC0003DMT400030540	0.982358	0.000458922	Gene of unknown function
StLNC1114	PGSC0003DMT400039599	0.995081	3.48e-05	Metallothionein
StLNC1114	PGSC0003DMT400039599	0.995081	3.48e-05	Metallothionein
StLNC1114	PGSC0003DMT400047871	0.988256	0.000202619	Binding protein
StLNC1114	PGSC0003DMT400047871	0.988256	0.000202619	Binding protein
StLNC1114	PGSC0003DMT400056399	0.991558	0.000104116	Gene of unknown function
StLNC1114	PGSC0003DMT400056399	0.991558	0.000104116	Gene of unknown function
StLNC1114	PGSC0003DMT400066949	0.989653	0.000156982	Nuc-1 negative regulatory protein preg
StLNC1114	PGSC0003DMT400066949	0.989653	0.000156982	Nuc-1 negative regulatory protein preg
StLNC1114	PGSC0003DMT400080134	0.991698	0.000100652	Conserved gene of unknown function
StLNC1114	PGSC0003DMT400080134	0.991698	0.000100652	Conserved gene of unknown function
StLNC1114	PGSC0003DMT400082814	0.980195	0.000578667	C3HL domain class transcription factor
StLNC1114	PGSC0003DMT400082814	0.980195	0.000578667	C3HL domain class transcription factor
StLNC0340	PGSC0003DMT400005679	0.985143	0.000325093	Protein pim1
StLNC0340	PGSC0003DMT400005679	0.985143	0.000325093	Protein pim1
StLNC0340	PGSC0003DMT400014120	0.98798	0.000212305	Gene of unknown function
StLNC0340	PGSC0003DMT400014120	0.98798	0.000212305	Gene of unknown function
StLNC0340	PGSC0003DMT400042652	0.991429	0.000107348	Kelch repeat-containing F-box family protein
StLNC0340	PGSC0003DMT400042652	0.991429	0.000107348	Kelch repeat-containing F-box family protein
StLNC0340	PGSC0003DMT400042899	0.982846	0.000433815	Gene of unknown function
StLNC0340	PGSC0003DMT400042899	0.982846	0.000433815	Gene of unknown function
StLNC0340	PGSC0003DMT400050100	0.983635	0.000394737	Prefoldin subunit
StLNC0340	PGSC0003DMT400050100	0.983635	0.000394737	Prefoldin subunit
StLNC0340	PGSC0003DMT400067994	0.989293	0.000168173	MYBR domain class transcription factor
StLNC0340	PGSC0003DMT400067994	0.989293	0.000168173	MYBR domain class transcription factor
StLNC0340	PGSC0003DMT400080666	0.982162	0.000469219	ATP binding protein
StLNC0340	PGSC0003DMT400080666	0.982162	0.000469219	ATP binding protein
StLNC0340	PGSC0003DMT400082412	0.981641	0.00049707	Gene of unknown function
StLNC0340	PGSC0003DMT400082412	0.981641	0.00049707	Gene of unknown function
StLNC2076	PGSC0003DMT400005501	0.982298	0.000462066	Conserved gene of unknown function
StLNC2076	PGSC0003DMT400005501	0.982298	0.000462066	Conserved gene of unknown function
StLNC2076	PGSC0003DMT400006821	0.982009	0.000477304	Conserved gene of unknown function
StLNC2076	PGSC0003DMT400006821	0.982009	0.000477304	Conserved gene of unknown function
StLNC2076	PGSC0003DMT400010577	0.98277	0.000437702	N-acetyltransferase
StLNC2076	PGSC0003DMT400010577	0.98277	0.000437702	N-acetyltransferase
StLNC2076	PGSC0003DMT400011730	0.981328	0.000514208	Novel plant snare
StLNC2076	PGSC0003DMT400011730	0.981328	0.000514208	Novel plant snare
StLNC2076	PGSC0003DMT400016271	0.981597	0.000499483	Gene of unknown function
StLNC2076	PGSC0003DMT400016271	0.981597	0.000499483	Gene of unknown function
StLNC2076	PGSC0003DMT400017833	0.997443	9.05e-06	E2 protein isoform 5
StLNC2076	PGSC0003DMT400017833	0.997443	9.05e-06	E2 protein isoform 5
StLNC2076	PGSC0003DMT400023517	0.990521	0.000131563	Protein phosphatase 2C 8
StLNC2076	PGSC0003DMT400023517	0.990521	0.000131563	Protein phosphatase 2C 8
StLNC2076	PGSC0003DMT400024599	0.998418	3.29e-06	Kunitz-type proteinase inhibitor
StLNC2076	PGSC0003DMT400024599	0.998418	3.29e-06	Kunitz-type proteinase inhibitor
StLNC2076	PGSC0003DMT400025766	0.984857	0.000337749	Conserved gene of unknown function
StLNC2076	PGSC0003DMT400025766	0.984857	0.000337749	Conserved gene of unknown function
StLNC2076	PGSC0003DMT400026257	0.993103	6.92e-05	Serine protease inhibitor 7
StLNC2076	PGSC0003DMT400026257	0.993103	6.92e-05	Serine protease inhibitor 7
StLNC2076	PGSC0003DMT400026671	0.985009	0.000330973	Ferredoxin
StLNC2076	PGSC0003DMT400026671	0.985009	0.000330973	Ferredoxin
StLNC2076	PGSC0003DMT400026957	0.988	0.000211599	Silencing group A protein
StLNC2076	PGSC0003DMT400026957	0.988	0.000211599	Silencing group A protein
StLNC2076	PGSC0003DMT400027827	0.986684	0.000260869	Glyoxalase/bleomycin resistance protein/dioxygenase
StLNC2076	PGSC0003DMT400027827	0.986684	0.000260869	Glyoxalase/bleomycin resistance protein/dioxygenase
StLNC2076	PGSC0003DMT400032400	0.982858	0.000433227	Proton pump interactor 1
StLNC2076	PGSC0003DMT400032400	0.982858	0.000433227	Proton pump interactor 1
StLNC2076	PGSC0003DMT400032945	0.980147	0.000581497	Ran GTPase binding protein
StLNC2076	PGSC0003DMT400032945	0.980147	0.000581497	Ran GTPase binding protein
StLNC2076	PGSC0003DMT400033475	0.98228	0.000463022	GrpE protein homolog
StLNC2076	PGSC0003DMT400033475	0.98228	0.000463022	GrpE protein homolog
StLNC2076	PGSC0003DMT400036807	0.98377	0.00038821	60S ribosomal protein L7
StLNC2076	PGSC0003DMT400036807	0.98377	0.00038821	60S ribosomal protein L7
StLNC2076	PGSC0003DMT400040286	0.984277	0.000364268	Conserved gene of unknown function
StLNC2076	PGSC0003DMT400040286	0.984277	0.000364268	Conserved gene of unknown function
StLNC2076	PGSC0003DMT400041920	0.985946	0.000290731	Gene of unknown function
StLNC2076	PGSC0003DMT400041920	0.985946	0.000290731	Gene of unknown function
StLNC2076	PGSC0003DMT400043199	0.990066	0.000144598	Gene of unknown function
StLNC2076	PGSC0003DMT400043199	0.990066	0.000144598	Gene of unknown function
StLNC2076	PGSC0003DMT400044052	0.99409	5.05e-05	Patatin-04/09
StLNC2076	PGSC0003DMT400044052	0.99409	5.05e-05	Patatin-04/09
StLNC2076	PGSC0003DMT400044779	0.986054	0.000286279	NOI
StLNC2076	PGSC0003DMT400044779	0.986054	0.000286279	NOI
StLNC2076	PGSC0003DMT400045787	0.986803	0.000256201	Gene of unknown function
StLNC2076	PGSC0003DMT400045787	0.986803	0.000256201	Gene of unknown function
StLNC2076	PGSC0003DMT400046694	0.98794	0.000213714	Protein phosphatase 2c
StLNC2076	PGSC0003DMT400046694	0.98794	0.000213714	Protein phosphatase 2c
StLNC2076	PGSC0003DMT400047871	0.985045	0.000329399	Binding protein
StLNC2076	PGSC0003DMT400047871	0.985045	0.000329399	Binding protein
StLNC2076	PGSC0003DMT400047936	0.981904	0.0004829	Gene of unknown function
StLNC2076	PGSC0003DMT400047936	0.981904	0.0004829	Gene of unknown function
StLNC2076	PGSC0003DMT400049444	0.985716	0.000300362	ALY protein
StLNC2076	PGSC0003DMT400049444	0.985716	0.000300362	ALY protein
StLNC2076	PGSC0003DMT400049677	0.987535	0.000228433	Nt-iaa4.5 deduced protein
StLNC2076	PGSC0003DMT400049677	0.987535	0.000228433	Nt-iaa4.5 deduced protein
StLNC2076	PGSC0003DMT400050882	0.982251	0.000464509	Transferase
StLNC2076	PGSC0003DMT400050882	0.982251	0.000464509	Transferase
StLNC2076	PGSC0003DMT400052377	0.983113	0.000420391	Gene of unknown function
StLNC2076	PGSC0003DMT400052377	0.983113	0.000420391	Gene of unknown function
StLNC2076	PGSC0003DMT400054025	0.982295	0.000462207	Conserved gene of unknown function
StLNC2076	PGSC0003DMT400054025	0.982295	0.000462207	Conserved gene of unknown function
StLNC2076	PGSC0003DMT400055201	0.984244	0.000365767	Conserved gene of unknown function
StLNC2076	PGSC0003DMT400055201	0.984244	0.000365767	Conserved gene of unknown function
StLNC2076	PGSC0003DMT400060765	0.987106	0.000244524	Conserved gene of unknown function
StLNC2076	PGSC0003DMT400060765	0.987106	0.000244524	Conserved gene of unknown function
StLNC2076	PGSC0003DMT400061226	0.991034	0.000117576	Stress-associated protein 10
StLNC2076	PGSC0003DMT400061226	0.991034	0.000117576	Stress-associated protein 10
StLNC2076	PGSC0003DMT400063687	0.987416	0.000232825	Chloroplast-targeted copper chaperone
StLNC2076	PGSC0003DMT400063687	0.987416	0.000232825	Chloroplast-targeted copper chaperone
StLNC2076	PGSC0003DMT400065097	0.982121	0.000471397	Conserved gene of unknown function
StLNC2076	PGSC0003DMT400065097	0.982121	0.000471397	Conserved gene of unknown function
StLNC2076	PGSC0003DMT400065837	0.980169	0.000580212	Nutrient reservoir
StLNC2076	PGSC0003DMT400065837	0.980169	0.000580212	Nutrient reservoir
StLNC2076	PGSC0003DMT400066533	0.983522	0.000400219	Auxin and ethylene responsive GH3
StLNC2076	PGSC0003DMT400066533	0.983522	0.000400219	Auxin and ethylene responsive GH3
StLNC2076	PGSC0003DMT400066909	0.984374	0.000359756	Kinase
StLNC2076	PGSC0003DMT400066909	0.984374	0.000359756	Kinase
StLNC2076	PGSC0003DMT400070034	0.992541	8.1e-05	DNA binding protein
StLNC2076	PGSC0003DMT400070034	0.992541	8.1e-05	DNA binding protein
StLNC2076	PGSC0003DMT400071311	0.983056	0.00042322	Ubiquitin carrier protein
StLNC2076	PGSC0003DMT400071311	0.983056	0.00042322	Ubiquitin carrier protein
StLNC2076	PGSC0003DMT400073431	0.982088	0.000473123	60S ribosomal protein L7
StLNC2076	PGSC0003DMT400073431	0.982088	0.000473123	60S ribosomal protein L7
StLNC2076	PGSC0003DMT400075172	0.980841	0.000541445	Patatin group O
StLNC2076	PGSC0003DMT400075172	0.980841	0.000541445	Patatin group O
StLNC2076	PGSC0003DMT400078063	0.988898	0.000180912	Conserved gene of unknown function
StLNC2076	PGSC0003DMT400078063	0.988898	0.000180912	Conserved gene of unknown function
StLNC2076	PGSC0003DMT400079324	0.988204	0.00020443	Metal ion binding protein
StLNC2076	PGSC0003DMT400079324	0.988204	0.00020443	Metal ion binding protein
StLNC2076	PGSC0003DMT400081258	0.981273	0.000517263	Fiber protein Fb2
StLNC2076	PGSC0003DMT400081258	0.981273	0.000517263	Fiber protein Fb2
StLNC2076	PGSC0003DMT400089578	0.992654	7.86e-05	Gene of unknown function
StLNC2076	PGSC0003DMT400089578	0.992654	7.86e-05	Gene of unknown function
StLNC2076	PGSC0003DMT400090071	0.986729	0.000259095	Conserved gene of unknown function
StLNC2076	PGSC0003DMT400090071	0.986729	0.000259095	Conserved gene of unknown function
StLNC2076	PGSC0003DMT400097185	0.981309	0.000515269	ATP binding protein
StLNC2076	PGSC0003DMT400097185	0.981309	0.000515269	ATP binding protein
StLNC0814	PGSC0003DMT400005679	0.990342	0.000136615	Protein pim1
StLNC0814	PGSC0003DMT400005679	0.990342	0.000136615	Protein pim1
StLNC0814	PGSC0003DMT400034451	0.982695	0.000441513	Gene of unknown function
StLNC0814	PGSC0003DMT400034451	0.982695	0.000441513	Gene of unknown function
StLNC0814	PGSC0003DMT400042652	0.984335	0.000361554	Kelch repeat-containing F-box family protein
StLNC0814	PGSC0003DMT400042652	0.984335	0.000361554	Kelch repeat-containing F-box family protein
StLNC0814	PGSC0003DMT400050100	0.993274	6.57e-05	Prefoldin subunit
StLNC0814	PGSC0003DMT400050100	0.993274	6.57e-05	Prefoldin subunit
StLNC0814	PGSC0003DMT400082412	0.988978	0.000178308	Gene of unknown function
StLNC0814	PGSC0003DMT400082412	0.988978	0.000178308	Gene of unknown function
StLNC1627	PGSC0003DMT400042417	0.9872	0.00024095	Lactoylglutathione lyase
StLNC1627	PGSC0003DMT400045665	0.989765	0.000153575	Annexin p34
StLNC1627	PGSC0003DMT400056861	0.987542	0.000228172	SM10-1
StLNC1627	PGSC0003DMT400060403	0.983825	0.000385549	I-box binding factor
StLNC1627	PGSC0003DMT400080258	0.98472	0.000343927	Binding protein
StLNC0351	PGSC0003DMT400000186	0.982838	0.00043425	BRASSINOSTEROID INSENSITIVE 1-associated receptor kinase 1
StLNC0351	PGSC0003DMT400000186	0.982838	0.00043425	BRASSINOSTEROID INSENSITIVE 1-associated receptor kinase 1
StLNC0351	PGSC0003DMT400000387	0.993885	5.42e-05	Conserved gene of unknown function
StLNC0351	PGSC0003DMT400000387	0.993885	5.42e-05	Conserved gene of unknown function
StLNC0351	PGSC0003DMT400000447	0.984149	0.00037023	Methylenetetrahydrofolate dehydrogenase
StLNC0351	PGSC0003DMT400000447	0.984149	0.00037023	Methylenetetrahydrofolate dehydrogenase
StLNC0351	PGSC0003DMT400000763	0.991872	9.64e-05	EMB2752
StLNC0351	PGSC0003DMT400000763	0.991872	9.64e-05	EMB2752
StLNC0351	PGSC0003DMT400001179	0.987522	0.000228893	Conserved gene of unknown function
StLNC0351	PGSC0003DMT400001179	0.987522	0.000228893	Conserved gene of unknown function
StLNC0351	PGSC0003DMT400001617	0.996198	2.05e-05	DNA-binding protein
StLNC0351	PGSC0003DMT400001617	0.996198	2.05e-05	DNA-binding protein
StLNC0351	PGSC0003DMT400001661	0.985429	0.000312649	Nucleosome-binding protein
StLNC0351	PGSC0003DMT400001661	0.985429	0.000312649	Nucleosome-binding protein
StLNC0351	PGSC0003DMT400001872	0.991418	0.000107613	Conserved gene of unknown function
StLNC0351	PGSC0003DMT400001872	0.991418	0.000107613	Conserved gene of unknown function
StLNC0351	PGSC0003DMT400002312	0.988605	0.000190655	BTB/POZ domain-containing protein
StLNC0351	PGSC0003DMT400002312	0.988605	0.000190655	BTB/POZ domain-containing protein
StLNC0351	PGSC0003DMT400002790	0.983955	0.000379389	Topoisomerase I
StLNC0351	PGSC0003DMT400002790	0.983955	0.000379389	Topoisomerase I
StLNC0351	PGSC0003DMT400004269	0.996506	1.73e-05	Transcription factor
StLNC0351	PGSC0003DMT400004269	0.996506	1.73e-05	Transcription factor
StLNC0351	PGSC0003DMT400005798	0.992294	8.66e-05	Auxin-regulated protein
StLNC0351	PGSC0003DMT400005798	0.992294	8.66e-05	Auxin-regulated protein
StLNC0351	PGSC0003DMT400006735	0.995878	2.42e-05	DNA binding protein
StLNC0351	PGSC0003DMT400006735	0.995878	2.42e-05	DNA binding protein
StLNC0351	PGSC0003DMT400007059	0.991488	0.000105859	Homeodomain-like
StLNC0351	PGSC0003DMT400007059	0.991488	0.000105859	Homeodomain-like
StLNC0351	PGSC0003DMT400007610	0.997286	1.02e-05	Gene of unknown function
StLNC0351	PGSC0003DMT400007610	0.997286	1.02e-05	Gene of unknown function
StLNC0351	PGSC0003DMT400009802	0.983259	0.000413127	Speckle-type POZ protein
StLNC0351	PGSC0003DMT400009802	0.983259	0.000413127	Speckle-type POZ protein
StLNC0351	PGSC0003DMT400011022	0.989792	0.000152742	N6-adenosine-methyltransferase 70 kDa subunit
StLNC0351	PGSC0003DMT400011022	0.989792	0.000152742	N6-adenosine-methyltransferase 70 kDa subunit
StLNC0351	PGSC0003DMT400011952	0.981815	0.000487716	ADP-ribosylation factor
StLNC0351	PGSC0003DMT400011952	0.981815	0.000487716	ADP-ribosylation factor
StLNC0351	PGSC0003DMT400012431	0.993489	6.15e-05	Oligouridylate binding protein
StLNC0351	PGSC0003DMT400012431	0.993489	6.15e-05	Oligouridylate binding protein
StLNC0351	PGSC0003DMT400012761	0.987557	0.000227593	C-terminal zinc-finger
StLNC0351	PGSC0003DMT400012761	0.987557	0.000227593	C-terminal zinc-finger
StLNC0351	PGSC0003DMT400013135	0.980541	0.000558602	Conserved gene of unknown function
StLNC0351	PGSC0003DMT400013135	0.980541	0.000558602	Conserved gene of unknown function
StLNC0351	PGSC0003DMT400013416	0.985412	0.000313379	Conserved gene of unknown function
StLNC0351	PGSC0003DMT400013416	0.985412	0.000313379	Conserved gene of unknown function
StLNC0351	PGSC0003DMT400013465	0.991568	0.000103866	Sec10
StLNC0351	PGSC0003DMT400013465	0.991568	0.000103866	Sec10
StLNC0351	PGSC0003DMT400014620	0.98058	0.000556363	NIMIN2c protein
StLNC0351	PGSC0003DMT400014620	0.98058	0.000556363	NIMIN2c protein
StLNC0351	PGSC0003DMT400017901	0.992325	8.59e-05	Gene of unknown function
StLNC0351	PGSC0003DMT400017901	0.992325	8.59e-05	Gene of unknown function
StLNC0351	PGSC0003DMT400018367	0.997923	5.86e-06	Histone H2B
StLNC0351	PGSC0003DMT400018367	0.997923	5.86e-06	Histone H2B
StLNC0351	PGSC0003DMT400019200	0.983198	0.000416145	Conserved gene of unknown function
StLNC0351	PGSC0003DMT400019200	0.983198	0.000416145	Conserved gene of unknown function
StLNC0351	PGSC0003DMT400021046	0.98762	0.000225291	RNA-binding protein
StLNC0351	PGSC0003DMT400021046	0.98762	0.000225291	RNA-binding protein
StLNC0351	PGSC0003DMT400024406	0.985366	0.00031535	Ubiquitin specific protease 39 and snrnp assembly factor
StLNC0351	PGSC0003DMT400024406	0.985366	0.00031535	Ubiquitin specific protease 39 and snrnp assembly factor
StLNC0351	PGSC0003DMT400026065	0.985983	0.000289212	CONSTANS
StLNC0351	PGSC0003DMT400026065	0.985983	0.000289212	CONSTANS
StLNC0351	PGSC0003DMT400030381	0.986015	0.000287867	Chloroplast small heat shock protein class I
StLNC0351	PGSC0003DMT400030381	0.986015	0.000287867	Chloroplast small heat shock protein class I
StLNC0351	PGSC0003DMT400030668	0.986669	0.000261444	Gene of unknown function
StLNC0351	PGSC0003DMT400030668	0.986669	0.000261444	Gene of unknown function
StLNC0351	PGSC0003DMT400031245	0.989796	0.000152645	BZIP domain class transcription factor
StLNC0351	PGSC0003DMT400031245	0.989796	0.000152645	BZIP domain class transcription factor
StLNC0351	PGSC0003DMT400031731	0.990848	0.000122549	ATP binding protein
StLNC0351	PGSC0003DMT400031731	0.990848	0.000122549	ATP binding protein
StLNC0351	PGSC0003DMT400034360	0.981941	0.000480926	Sil1
StLNC0351	PGSC0003DMT400034360	0.981941	0.000480926	Sil1
StLNC0351	PGSC0003DMT400035441	0.997271	1.04e-05	RWP-RK domain-containing protein
StLNC0351	PGSC0003DMT400035441	0.997271	1.04e-05	RWP-RK domain-containing protein
StLNC0351	PGSC0003DMT400035522	0.992974	7.18e-05	RING finger protein 113A
StLNC0351	PGSC0003DMT400035522	0.992974	7.18e-05	RING finger protein 113A
StLNC0351	PGSC0003DMT400035686	0.991581	0.000103536	Clathrin binding protein
StLNC0351	PGSC0003DMT400035686	0.991581	0.000103536	Clathrin binding protein
StLNC0351	PGSC0003DMT400037315	0.982419	0.00045576	DDRGK domain-containing protein 1
StLNC0351	PGSC0003DMT400037315	0.982419	0.00045576	DDRGK domain-containing protein 1
StLNC0351	PGSC0003DMT400038588	0.983485	0.000402026	Transcription factor IIB
StLNC0351	PGSC0003DMT400038588	0.983485	0.000402026	Transcription factor IIB
StLNC0351	PGSC0003DMT400039113	0.984953	0.000333472	Gene of unknown function
StLNC0351	PGSC0003DMT400039113	0.984953	0.000333472	Gene of unknown function
StLNC0351	PGSC0003DMT400040064	0.982754	0.000438508	Zinc finger, C2H2 type family protein
StLNC0351	PGSC0003DMT400040064	0.982754	0.000438508	Zinc finger, C2H2 type family protein
StLNC0351	PGSC0003DMT400042253	0.991709	0.000100378	Zinc finger CCCH domain-containing protein 32
StLNC0351	PGSC0003DMT400042253	0.991709	0.000100378	Zinc finger CCCH domain-containing protein 32
StLNC0351	PGSC0003DMT400042449	0.988016	0.000211038	Derlin-2
StLNC0351	PGSC0003DMT400042449	0.988016	0.000211038	Derlin-2
StLNC0351	PGSC0003DMT400043101	0.991515	0.000105169	Dead box ATP-dependent RNA helicase
StLNC0351	PGSC0003DMT400043101	0.991515	0.000105169	Dead box ATP-dependent RNA helicase
StLNC0351	PGSC0003DMT400043928	0.98221	0.000466696	DNA binding protein
StLNC0351	PGSC0003DMT400043928	0.98221	0.000466696	DNA binding protein
StLNC0351	PGSC0003DMT400045161	0.994614	4.18e-05	Conserved gene of unknown function
StLNC0351	PGSC0003DMT400045161	0.994614	4.18e-05	Conserved gene of unknown function
StLNC0351	PGSC0003DMT400045226	0.990916	0.000120724	RNA recognition motif-containing protein
StLNC0351	PGSC0003DMT400045226	0.990916	0.000120724	RNA recognition motif-containing protein
StLNC0351	PGSC0003DMT400045733	0.982286	0.000462703	Transcription factor
StLNC0351	PGSC0003DMT400045733	0.982286	0.000462703	Transcription factor
StLNC0351	PGSC0003DMT400046624	0.992896	7.34e-05	Cell division cycle protein 48
StLNC0351	PGSC0003DMT400046624	0.992896	7.34e-05	Cell division cycle protein 48
StLNC0351	PGSC0003DMT400048853	0.981293	0.000516156	Gene of unknown function
StLNC0351	PGSC0003DMT400048853	0.981293	0.000516156	Gene of unknown function
StLNC0351	PGSC0003DMT400049793	0.993079	6.96e-05	DNA binding protein
StLNC0351	PGSC0003DMT400049793	0.993079	6.96e-05	DNA binding protein
StLNC0351	PGSC0003DMT400050118	0.983491	0.000401721	Gene of unknown function
StLNC0351	PGSC0003DMT400050118	0.983491	0.000401721	Gene of unknown function
StLNC0351	PGSC0003DMT400050662	0.989341	0.000166679	Cell division cycle protein 48 homolog
StLNC0351	PGSC0003DMT400050662	0.989341	0.000166679	Cell division cycle protein 48 homolog
StLNC0351	PGSC0003DMT400051809	0.995745	2.59e-05	Peptidylprolyl isomerase
StLNC0351	PGSC0003DMT400051809	0.995745	2.59e-05	Peptidylprolyl isomerase
StLNC0351	PGSC0003DMT400053351	0.981719	0.000492859	Reverse transcriptase
StLNC0351	PGSC0003DMT400053351	0.981719	0.000492859	Reverse transcriptase
StLNC0351	PGSC0003DMT400054947	0.988533	0.000193085	U-box protein
StLNC0351	PGSC0003DMT400054947	0.988533	0.000193085	U-box protein
StLNC0351	PGSC0003DMT400054948	0.997298	1.01e-05	U-box protein
StLNC0351	PGSC0003DMT400054948	0.997298	1.01e-05	U-box protein
StLNC0351	PGSC0003DMT400054949	0.995788	2.53e-05	U-box protein
StLNC0351	PGSC0003DMT400054949	0.995788	2.53e-05	U-box protein
StLNC0351	PGSC0003DMT400054955	0.991568	0.000103843	Conserved gene of unknown function
StLNC0351	PGSC0003DMT400054955	0.991568	0.000103843	Conserved gene of unknown function
StLNC0351	PGSC0003DMT400055049	0.987501	0.000229684	U-box protein
StLNC0351	PGSC0003DMT400055049	0.987501	0.000229684	U-box protein
StLNC0351	PGSC0003DMT400055050	0.993349	6.42e-05	U-box protein
StLNC0351	PGSC0003DMT400055050	0.993349	6.42e-05	U-box protein
StLNC0351	PGSC0003DMT400055136	0.980545	0.000558382	Gene of unknown function
StLNC0351	PGSC0003DMT400055136	0.980545	0.000558382	Gene of unknown function
StLNC0351	PGSC0003DMT400055719	0.985272	0.000319414	Conserved gene of unknown function
StLNC0351	PGSC0003DMT400055719	0.985272	0.000319414	Conserved gene of unknown function
StLNC0351	PGSC0003DMT400056716	0.991007	0.000118286	DNA binding protein
StLNC0351	PGSC0003DMT400056716	0.991007	0.000118286	DNA binding protein
StLNC0351	PGSC0003DMT400057987	0.988885	0.00018134	DNA-damage-repair/toleration protein DRT102
StLNC0351	PGSC0003DMT400057987	0.988885	0.00018134	DNA-damage-repair/toleration protein DRT102
StLNC0351	PGSC0003DMT400058162	0.981039	0.000530288	Conserved gene of unknown function
StLNC0351	PGSC0003DMT400058162	0.981039	0.000530288	Conserved gene of unknown function
StLNC0351	PGSC0003DMT400058261	0.987207	0.000240685	Conserved gene of unknown function
StLNC0351	PGSC0003DMT400058261	0.987207	0.000240685	Conserved gene of unknown function
StLNC0351	PGSC0003DMT400058456	0.993487	6.16e-05	BTB-POZ and MATH domain protein
StLNC0351	PGSC0003DMT400058456	0.993487	6.16e-05	BTB-POZ and MATH domain protein
StLNC0351	PGSC0003DMT400058757	0.989424	0.000164059	Sphingolipid delta 4 desaturase DES-1
StLNC0351	PGSC0003DMT400058757	0.989424	0.000164059	Sphingolipid delta 4 desaturase DES-1
StLNC0351	PGSC0003DMT400059831	0.985818	0.000296067	Zinc finger protein
StLNC0351	PGSC0003DMT400059831	0.985818	0.000296067	Zinc finger protein
StLNC0351	PGSC0003DMT400062061	0.982702	0.000441149	Hydroxyproline-rich glycoprotein family protein
StLNC0351	PGSC0003DMT400062061	0.982702	0.000441149	Hydroxyproline-rich glycoprotein family protein
StLNC0351	PGSC0003DMT400062698	0.983615	0.000395665	Conserved gene of unknown function
StLNC0351	PGSC0003DMT400062698	0.983615	0.000395665	Conserved gene of unknown function
StLNC0351	PGSC0003DMT400062828	0.992469	8.26e-05	Conserved gene of unknown function
StLNC0351	PGSC0003DMT400062828	0.992469	8.26e-05	Conserved gene of unknown function
StLNC0351	PGSC0003DMT400062877	0.991419	0.000107598	Gonadotropin beta chain
StLNC0351	PGSC0003DMT400062877	0.991419	0.000107598	Gonadotropin beta chain
StLNC0351	PGSC0003DMT400063510	0.991018	0.000118002	WD-repeat protein
StLNC0351	PGSC0003DMT400063510	0.991018	0.000118002	WD-repeat protein
StLNC0351	PGSC0003DMT400065251	0.981976	0.000479067	Phototropin-1
StLNC0351	PGSC0003DMT400065251	0.981976	0.000479067	Phototropin-1
StLNC0351	PGSC0003DMT400065476	0.980115	0.000583349	Narf
StLNC0351	PGSC0003DMT400065476	0.980115	0.000583349	Narf
StLNC0351	PGSC0003DMT400066372	0.990047	0.000145151	Gene of unknown function
StLNC0351	PGSC0003DMT400066372	0.990047	0.000145151	Gene of unknown function
StLNC0351	PGSC0003DMT400066755	0.988504	0.000194099	Gene of unknown function
StLNC0351	PGSC0003DMT400066755	0.988504	0.000194099	Gene of unknown function
StLNC0351	PGSC0003DMT400067229	0.996463	1.77e-05	Gene of unknown function
StLNC0351	PGSC0003DMT400067229	0.996463	1.77e-05	Gene of unknown function
StLNC0351	PGSC0003DMT400067670	0.990895	0.000121276	Ring finger protein
StLNC0351	PGSC0003DMT400067670	0.990895	0.000121276	Ring finger protein
StLNC0351	PGSC0003DMT400067858	0.989679	0.000156172	Mannose-6-phosphate isomerase
StLNC0351	PGSC0003DMT400067858	0.989679	0.000156172	Mannose-6-phosphate isomerase
StLNC0351	PGSC0003DMT400068037	0.993495	6.14e-05	DNA binding protein
StLNC0351	PGSC0003DMT400068037	0.993495	6.14e-05	DNA binding protein
StLNC0351	PGSC0003DMT400068170	0.986179	0.000281131	Ubiquitin-protein ligase
StLNC0351	PGSC0003DMT400068170	0.986179	0.000281131	Ubiquitin-protein ligase
StLNC0351	PGSC0003DMT400068299	0.993633	5.88e-05	Conserved gene of unknown function
StLNC0351	PGSC0003DMT400068299	0.993633	5.88e-05	Conserved gene of unknown function
StLNC0351	PGSC0003DMT400068988	0.983516	0.0004005	Gene of unknown function
StLNC0351	PGSC0003DMT400068988	0.983516	0.0004005	Gene of unknown function
StLNC0351	PGSC0003DMT400069690	0.997497	8.66e-06	EXECUTER1 protein, chloroplast
StLNC0351	PGSC0003DMT400069690	0.997497	8.66e-06	EXECUTER1 protein, chloroplast
StLNC0351	PGSC0003DMT400071187	0.993257	6.61e-05	Uncharacterized CRM domain-containing protein, chloroplastic
StLNC0351	PGSC0003DMT400071187	0.993257	6.61e-05	Uncharacterized CRM domain-containing protein, chloroplastic
StLNC0351	PGSC0003DMT400071394	0.995245	3.25e-05	F-box family protein
StLNC0351	PGSC0003DMT400071394	0.995245	3.25e-05	F-box family protein
StLNC0351	PGSC0003DMT400071667	0.988679	0.000188165	Conserved gene of unknown function
StLNC0351	PGSC0003DMT400071667	0.988679	0.000188165	Conserved gene of unknown function
StLNC0351	PGSC0003DMT400071721	0.983907	0.000381672	Meiotic recombination protein spo11
StLNC0351	PGSC0003DMT400071721	0.983907	0.000381672	Meiotic recombination protein spo11
StLNC0351	PGSC0003DMT400072543	0.982844	0.000433937	Carotenoid isomerase, chloroplastic
StLNC0351	PGSC0003DMT400072543	0.982844	0.000433937	Carotenoid isomerase, chloroplastic
StLNC0351	PGSC0003DMT400074245	0.984295	0.000363418	Translation initiation factor eif-2b alpha subunit
StLNC0351	PGSC0003DMT400074245	0.984295	0.000363418	Translation initiation factor eif-2b alpha subunit
StLNC0351	PGSC0003DMT400074822	0.981906	0.000482785	Conserved gene of unknown function
StLNC0351	PGSC0003DMT400074822	0.981906	0.000482785	Conserved gene of unknown function
StLNC0351	PGSC0003DMT400075059	0.988237	0.000203269	Gene of unknown function
StLNC0351	PGSC0003DMT400075059	0.988237	0.000203269	Gene of unknown function
StLNC0351	PGSC0003DMT400075342	0.9993	5.4e-07	F17H15.1/F17H15.1
StLNC0351	PGSC0003DMT400075342	0.9993	5.4e-07	F17H15.1/F17H15.1
StLNC0351	PGSC0003DMT400076731	0.995095	3.46e-05	RNA-binding region RNP-1 (RNA recognition motif)
StLNC0351	PGSC0003DMT400076731	0.995095	3.46e-05	RNA-binding region RNP-1 (RNA recognition motif)
StLNC0351	PGSC0003DMT400077199	0.987858	0.000216666	Transcription factor
StLNC0351	PGSC0003DMT400077199	0.987858	0.000216666	Transcription factor
StLNC0351	PGSC0003DMT400077346	0.984346	0.000361062	Conserved gene of unknown function
StLNC0351	PGSC0003DMT400077346	0.984346	0.000361062	Conserved gene of unknown function
StLNC0351	PGSC0003DMT400077801	0.986765	0.000257693	ATP binding protein
StLNC0351	PGSC0003DMT400077801	0.986765	0.000257693	ATP binding protein
StLNC0351	PGSC0003DMT400078654	0.990421	0.000134371	Calcium-binding protein CML24
StLNC0351	PGSC0003DMT400078654	0.990421	0.000134371	Calcium-binding protein CML24
StLNC0351	PGSC0003DMT400079206	0.986734	0.000258919	Phi-1 protein
StLNC0351	PGSC0003DMT400079206	0.986734	0.000258919	Phi-1 protein
StLNC0351	PGSC0003DMT400079762	0.992248	8.76e-05	Gene of unknown function
StLNC0351	PGSC0003DMT400079762	0.992248	8.76e-05	Gene of unknown function
StLNC0351	PGSC0003DMT400079854	0.9817	0.000493906	Zinc ion binding protein
StLNC0351	PGSC0003DMT400079854	0.9817	0.000493906	Zinc ion binding protein
StLNC0351	PGSC0003DMT400079856	0.982074	0.000473851	Xyloglucan endotransglycosylase
StLNC0351	PGSC0003DMT400079856	0.982074	0.000473851	Xyloglucan endotransglycosylase
StLNC0351	PGSC0003DMT400080154	0.984583	0.000350153	Gene of unknown function
StLNC0351	PGSC0003DMT400080154	0.984583	0.000350153	Gene of unknown function
StLNC0351	PGSC0003DMT400080452	0.991523	0.000104973	Oligopeptide transporter
StLNC0351	PGSC0003DMT400080452	0.991523	0.000104973	Oligopeptide transporter
StLNC0351	PGSC0003DMT400083739	0.98731	0.000236804	MADS transcriptional factor
StLNC0351	PGSC0003DMT400083739	0.98731	0.000236804	MADS transcriptional factor
StLNC0351	PGSC0003DMT400091020	0.983105	0.000420793	Potassium channel NKT1
StLNC0351	PGSC0003DMT400091020	0.983105	0.000420793	Potassium channel NKT1
StLNC1552	PGSC0003DMT400004642	0.985714	0.000300478	Ubiquitin-protein ligase
StLNC1552	PGSC0003DMT400004642	0.985714	0.000300478	Ubiquitin-protein ligase
StLNC1139	PGSC0003DMT400005865	0.985599	0.000305347	Gene of unknown function
StLNC1139	PGSC0003DMT400030244	0.980711	0.000548846	Gene of unknown function
StLNC0091	PGSC0003DMT400003409	0.991148	0.000114569	Conserved gene of unknown function
StLNC0091	PGSC0003DMT400003409	0.991148	0.000114569	Conserved gene of unknown function
StLNC0091	PGSC0003DMT400020346	0.982172	0.000468706	RGC1
StLNC0091	PGSC0003DMT400020346	0.982172	0.000468706	RGC1
StLNC0091	PGSC0003DMT400023448	0.991514	0.000105202	Receptor serine/threonine kinase
StLNC0091	PGSC0003DMT400023448	0.991514	0.000105202	Receptor serine/threonine kinase
StLNC0091	PGSC0003DMT400025869	0.984248	0.000365587	Bromodomain-containing protein
StLNC0091	PGSC0003DMT400025869	0.984248	0.000365587	Bromodomain-containing protein
StLNC0091	PGSC0003DMT400028924	0.991832	9.74e-05	Ubiquitin carboxyl-terminal hydrolase
StLNC0091	PGSC0003DMT400028924	0.991832	9.74e-05	Ubiquitin carboxyl-terminal hydrolase
StLNC0091	PGSC0003DMT400030679	0.989667	0.000156538	Uro-adherence factor A
StLNC0091	PGSC0003DMT400030679	0.989667	0.000156538	Uro-adherence factor A
StLNC0091	PGSC0003DMT400031321	0.980935	0.000536176	Cell division control protein
StLNC0091	PGSC0003DMT400031321	0.980935	0.000536176	Cell division control protein
StLNC0091	PGSC0003DMT400047305	0.987023	0.000247678	Gene of unknown function
StLNC0091	PGSC0003DMT400047305	0.987023	0.000247678	Gene of unknown function
StLNC0091	PGSC0003DMT400054667	0.981053	0.000529535	Argonaute protein group
StLNC0091	PGSC0003DMT400054667	0.981053	0.000529535	Argonaute protein group
StLNC0091	PGSC0003DMT400062863	0.994672	4.09e-05	Ubiquitin-protein ligase
StLNC0091	PGSC0003DMT400062863	0.994672	4.09e-05	Ubiquitin-protein ligase
StLNC0091	PGSC0003DMT400065823	0.983708	0.000391176	NDR1
StLNC0091	PGSC0003DMT400065823	0.983708	0.000391176	NDR1
StLNC0091	PGSC0003DMT400067977	0.983779	0.00038779	Tir-nbs-lrr resistance protein
StLNC0091	PGSC0003DMT400067977	0.983779	0.00038779	Tir-nbs-lrr resistance protein
StLNC0091	PGSC0003DMT400067981	0.981999	0.00047784	ATP binding protein
StLNC0091	PGSC0003DMT400067981	0.981999	0.00047784	ATP binding protein
StLNC0091	PGSC0003DMT400071404	0.989289	0.000168317	Acyl-CoA thioesterase
StLNC0091	PGSC0003DMT400071404	0.989289	0.000168317	Acyl-CoA thioesterase
StLNC0419	PGSC0003DMT400000295	0.981937	0.000481155	Pentatricopeptide repeat-containing protein, mitochondrial
StLNC0419	PGSC0003DMT400000295	0.981937	0.000481155	Pentatricopeptide repeat-containing protein, mitochondrial
StLNC0419	PGSC0003DMT400000299	0.990241	0.000139501	Gene of unknown function
StLNC0419	PGSC0003DMT400000299	0.990241	0.000139501	Gene of unknown function
StLNC0419	PGSC0003DMT400000859	0.993069	6.99e-05	Conserved gene of unknown function
StLNC0419	PGSC0003DMT400000859	0.993069	6.99e-05	Conserved gene of unknown function
StLNC0419	PGSC0003DMT400000946	0.984985	0.000332067	Arginyl-tRNA synthetase
StLNC0419	PGSC0003DMT400000946	0.984985	0.000332067	Arginyl-tRNA synthetase
StLNC0419	PGSC0003DMT400001077	0.982514	0.000450833	RNA processing factor 1
StLNC0419	PGSC0003DMT400001077	0.982514	0.000450833	RNA processing factor 1
StLNC0419	PGSC0003DMT400001470	0.992347	8.54e-05	Pentatricopeptide repeat-containing protein
StLNC0419	PGSC0003DMT400001470	0.992347	8.54e-05	Pentatricopeptide repeat-containing protein
StLNC0419	PGSC0003DMT400001530	0.992103	9.1e-05	Conserved gene of unknown function
StLNC0419	PGSC0003DMT400001530	0.992103	9.1e-05	Conserved gene of unknown function
StLNC0419	PGSC0003DMT400001555	0.985474	0.000310678	DNA mismatch repair muts family protein
StLNC0419	PGSC0003DMT400001555	0.985474	0.000310678	DNA mismatch repair muts family protein
StLNC0419	PGSC0003DMT400001865	0.985148	0.000324864	Transcription regulatory protein SWI3
StLNC0419	PGSC0003DMT400001865	0.985148	0.000324864	Transcription regulatory protein SWI3
StLNC0419	PGSC0003DMT400002341	0.982687	0.000441913	Thylakoid-bound ascorbate peroxidase 6
StLNC0419	PGSC0003DMT400002341	0.982687	0.000441913	Thylakoid-bound ascorbate peroxidase 6
StLNC0419	PGSC0003DMT400002375	0.987299	0.000237214	AP2/ERF domain-containing transcription factor
StLNC0419	PGSC0003DMT400002375	0.987299	0.000237214	AP2/ERF domain-containing transcription factor
StLNC0419	PGSC0003DMT400003784	0.982891	0.00043152	Auxin-responsive protein IAA13
StLNC0419	PGSC0003DMT400003784	0.982891	0.00043152	Auxin-responsive protein IAA13
StLNC0419	PGSC0003DMT400003794	0.988659	0.000188854	Conserved gene of unknown function
StLNC0419	PGSC0003DMT400003794	0.988659	0.000188854	Conserved gene of unknown function
StLNC0419	PGSC0003DMT400003893	0.988464	0.000195459	Conserved gene of unknown function
StLNC0419	PGSC0003DMT400003893	0.988464	0.000195459	Conserved gene of unknown function
StLNC0419	PGSC0003DMT400003907	0.990237	0.000139611	Conserved gene of unknown function
StLNC0419	PGSC0003DMT400003907	0.990237	0.000139611	Conserved gene of unknown function
StLNC0419	PGSC0003DMT400004063	0.984332	0.000361684	Conserved gene of unknown function
StLNC0419	PGSC0003DMT400004063	0.984332	0.000361684	Conserved gene of unknown function
StLNC0419	PGSC0003DMT400004778	0.98073	0.000547758	Conserved gene of unknown function
StLNC0419	PGSC0003DMT400004778	0.98073	0.000547758	Conserved gene of unknown function
StLNC0419	PGSC0003DMT400005086	0.983025	0.000424802	Avr9/Cf-9 rapidly elicited protein 76
StLNC0419	PGSC0003DMT400005086	0.983025	0.000424802	Avr9/Cf-9 rapidly elicited protein 76
StLNC0419	PGSC0003DMT400005512	0.981966	0.000479601	Zinc finger protein
StLNC0419	PGSC0003DMT400005512	0.981966	0.000479601	Zinc finger protein
StLNC0419	PGSC0003DMT400006346	0.980653	0.000552167	Developmentally regulated GTP-binding protein
StLNC0419	PGSC0003DMT400006346	0.980653	0.000552167	Developmentally regulated GTP-binding protein
StLNC0419	PGSC0003DMT400006421	0.983773	0.000388068	Zinc finger protein
StLNC0419	PGSC0003DMT400006421	0.983773	0.000388068	Zinc finger protein
StLNC0419	PGSC0003DMT400006527	0.984546	0.000351821	Cytoplasmic dynein light chain
StLNC0419	PGSC0003DMT400006527	0.984546	0.000351821	Cytoplasmic dynein light chain
StLNC0419	PGSC0003DMT400006681	0.981008	0.000532033	Ribosomal protein L28
StLNC0419	PGSC0003DMT400006681	0.981008	0.000532033	Ribosomal protein L28
StLNC0419	PGSC0003DMT400006974	0.984396	0.000358716	Iron-sulfur cluster assembly protein
StLNC0419	PGSC0003DMT400006974	0.984396	0.000358716	Iron-sulfur cluster assembly protein
StLNC0419	PGSC0003DMT400007024	0.98293	0.000429559	Gene of unknown function
StLNC0419	PGSC0003DMT400007024	0.98293	0.000429559	Gene of unknown function
StLNC0419	PGSC0003DMT400007183	0.982392	0.000457132	Small GTP-binding protein Sar1BNt
StLNC0419	PGSC0003DMT400007183	0.982392	0.000457132	Small GTP-binding protein Sar1BNt
StLNC0419	PGSC0003DMT400007325	0.983711	0.000391053	Eukaryotic translation initiation factor 5A-4
StLNC0419	PGSC0003DMT400007325	0.983711	0.000391053	Eukaryotic translation initiation factor 5A-4
StLNC0419	PGSC0003DMT400007434	0.988017	0.000210976	Sn-1 protein
StLNC0419	PGSC0003DMT400007434	0.988017	0.000210976	Sn-1 protein
StLNC0419	PGSC0003DMT400007737	0.988153	0.000206185	Regulator of gene silencing
StLNC0419	PGSC0003DMT400007737	0.988153	0.000206185	Regulator of gene silencing
StLNC0419	PGSC0003DMT400007742	0.98605	0.000286451	Cellular nucleic acid binding protein
StLNC0419	PGSC0003DMT400007742	0.98605	0.000286451	Cellular nucleic acid binding protein
StLNC0419	PGSC0003DMT400007759	0.981264	0.000517758	Conserved gene of unknown function
StLNC0419	PGSC0003DMT400007759	0.981264	0.000517758	Conserved gene of unknown function
StLNC0419	PGSC0003DMT400008560	0.987279	0.000237971	F-box protein GID2
StLNC0419	PGSC0003DMT400008560	0.987279	0.000237971	F-box protein GID2
StLNC0419	PGSC0003DMT400008581	0.984263	0.000364899	Conserved gene of unknown function
StLNC0419	PGSC0003DMT400008581	0.984263	0.000364899	Conserved gene of unknown function
StLNC0419	PGSC0003DMT400009420	0.980269	0.000574323	Amine oxidase
StLNC0419	PGSC0003DMT400009420	0.980269	0.000574323	Amine oxidase
StLNC0419	PGSC0003DMT400010000	0.986562	0.00026569	Acc synthase
StLNC0419	PGSC0003DMT400010000	0.986562	0.00026569	Acc synthase
StLNC0419	PGSC0003DMT400010008	0.990298	0.000137866	Conserved gene of unknown function
StLNC0419	PGSC0003DMT400010008	0.990298	0.000137866	Conserved gene of unknown function
StLNC0419	PGSC0003DMT400011470	0.988071	0.000209068	BRASSINAZOLE-RESISTANT 1 protein
StLNC0419	PGSC0003DMT400011470	0.988071	0.000209068	BRASSINAZOLE-RESISTANT 1 protein
StLNC0419	PGSC0003DMT400011762	0.982201	0.000467134	Invertase inhibitor
StLNC0419	PGSC0003DMT400011762	0.982201	0.000467134	Invertase inhibitor
StLNC0419	PGSC0003DMT400012368	0.986098	0.000284466	Conserved gene of unknown function
StLNC0419	PGSC0003DMT400012368	0.986098	0.000284466	Conserved gene of unknown function
StLNC0419	PGSC0003DMT400012849	0.997269	1.04e-05	RING-H2 finger protein RHG1a
StLNC0419	PGSC0003DMT400012849	0.997269	1.04e-05	RING-H2 finger protein RHG1a
StLNC0419	PGSC0003DMT400012873	0.984014	0.000376573	Crooked neck protein
StLNC0419	PGSC0003DMT400012873	0.984014	0.000376573	Crooked neck protein
StLNC0419	PGSC0003DMT400013036	0.987918	0.000214532	Nuclear acid binding protein
StLNC0419	PGSC0003DMT400013036	0.987918	0.000214532	Nuclear acid binding protein
StLNC0419	PGSC0003DMT400014351	0.985722	0.000300115	Conserved gene of unknown function
StLNC0419	PGSC0003DMT400014351	0.985722	0.000300115	Conserved gene of unknown function
StLNC0419	PGSC0003DMT400014493	0.984101	0.000372496	Geranylgeranyl transferase type II beta subunit
StLNC0419	PGSC0003DMT400014493	0.984101	0.000372496	Geranylgeranyl transferase type II beta subunit
StLNC0419	PGSC0003DMT400014744	0.984034	0.000375637	Spliceosome associated protein
StLNC0419	PGSC0003DMT400014744	0.984034	0.000375637	Spliceosome associated protein
StLNC0419	PGSC0003DMT400015910	0.98058	0.000556357	Conserved gene of unknown function
StLNC0419	PGSC0003DMT400015910	0.98058	0.000556357	Conserved gene of unknown function
StLNC0419	PGSC0003DMT400015931	0.98853	0.000193213	Gene of unknown function
StLNC0419	PGSC0003DMT400015931	0.98853	0.000193213	Gene of unknown function
StLNC0419	PGSC0003DMT400016577	0.981305	0.000515502	SAM domain family protein
StLNC0419	PGSC0003DMT400016577	0.981305	0.000515502	SAM domain family protein
StLNC0419	PGSC0003DMT400016998	0.985514	0.000308989	Spotted leaf protein
StLNC0419	PGSC0003DMT400016998	0.985514	0.000308989	Spotted leaf protein
StLNC0419	PGSC0003DMT400017590	0.983699	0.000391623	F-box family protein
StLNC0419	PGSC0003DMT400017590	0.983699	0.000391623	F-box family protein
StLNC0419	PGSC0003DMT400018543	0.980685	0.000550334	R3h domain containing protein
StLNC0419	PGSC0003DMT400018543	0.980685	0.000550334	R3h domain containing protein
StLNC0419	PGSC0003DMT400020263	0.982924	0.000429886	Conserved gene of unknown function
StLNC0419	PGSC0003DMT400020263	0.982924	0.000429886	Conserved gene of unknown function
StLNC0419	PGSC0003DMT400020650	0.988654	0.000189009	DCL protein
StLNC0419	PGSC0003DMT400020650	0.988654	0.000189009	DCL protein
StLNC0419	PGSC0003DMT400020825	0.983811	0.00038624	Bel1 homeotic protein
StLNC0419	PGSC0003DMT400020825	0.983811	0.00038624	Bel1 homeotic protein
StLNC0419	PGSC0003DMT400021142	0.989544	0.000160332	Class II small heat shock protein Le-HSP17.6
StLNC0419	PGSC0003DMT400021142	0.989544	0.000160332	Class II small heat shock protein Le-HSP17.6
StLNC0419	PGSC0003DMT400022096	0.991144	0.000114687	Integral membrane single C2 domain protein
StLNC0419	PGSC0003DMT400022096	0.991144	0.000114687	Integral membrane single C2 domain protein
StLNC0419	PGSC0003DMT400022169	0.990648	0.000128024	Conserved gene of unknown function
StLNC0419	PGSC0003DMT400022169	0.990648	0.000128024	Conserved gene of unknown function
StLNC0419	PGSC0003DMT400022377	0.988998	0.00017766	Protein kinase
StLNC0419	PGSC0003DMT400022377	0.988998	0.00017766	Protein kinase
StLNC0419	PGSC0003DMT400022649	0.98336	0.000408129	Conserved gene of unknown function
StLNC0419	PGSC0003DMT400022649	0.98336	0.000408129	Conserved gene of unknown function
StLNC0419	PGSC0003DMT400022899	0.988014	0.000211102	Conserved gene of unknown function
StLNC0419	PGSC0003DMT400022899	0.988014	0.000211102	Conserved gene of unknown function
StLNC0419	PGSC0003DMT400023016	0.981536	0.000502787	Metallothionein
StLNC0419	PGSC0003DMT400023016	0.981536	0.000502787	Metallothionein
StLNC0419	PGSC0003DMT400023075	0.981779	0.000489639	Spliceosome associated protein
StLNC0419	PGSC0003DMT400023075	0.981779	0.000489639	Spliceosome associated protein
StLNC0419	PGSC0003DMT400024508	0.988787	0.000184578	Dehydration-responsive element binding protein 3
StLNC0419	PGSC0003DMT400024508	0.988787	0.000184578	Dehydration-responsive element binding protein 3
StLNC0419	PGSC0003DMT400024580	0.983677	0.000392696	Conserved gene of unknown function
StLNC0419	PGSC0003DMT400024580	0.983677	0.000392696	Conserved gene of unknown function
StLNC0419	PGSC0003DMT400025655	0.980973	0.000534033	Gene of unknown function
StLNC0419	PGSC0003DMT400025655	0.980973	0.000534033	Gene of unknown function
StLNC0419	PGSC0003DMT400025712	0.984469	0.000355371	Conserved gene of unknown function
StLNC0419	PGSC0003DMT400025712	0.984469	0.000355371	Conserved gene of unknown function
StLNC0419	PGSC0003DMT400026377	0.983245	0.000413791	DNA-binding protein RHL1
StLNC0419	PGSC0003DMT400026377	0.983245	0.000413791	DNA-binding protein RHL1
StLNC0419	PGSC0003DMT400027542	0.989559	0.000159855	E3 ubiquitin ligase PUB14
StLNC0419	PGSC0003DMT400027542	0.989559	0.000159855	E3 ubiquitin ligase PUB14
StLNC0419	PGSC0003DMT400027645	0.986571	0.000265352	Conserved gene of unknown function
StLNC0419	PGSC0003DMT400027645	0.986571	0.000265352	Conserved gene of unknown function
StLNC0419	PGSC0003DMT400027828	0.985378	0.000314818	Salt responsive protein 2
StLNC0419	PGSC0003DMT400027828	0.985378	0.000314818	Salt responsive protein 2
StLNC0419	PGSC0003DMT400027999	0.98097	0.000534175	Conserved gene of unknown function
StLNC0419	PGSC0003DMT400027999	0.98097	0.000534175	Conserved gene of unknown function
StLNC0419	PGSC0003DMT400028574	0.98756	0.00022749	Structural constituent of ribosome
StLNC0419	PGSC0003DMT400028574	0.98756	0.00022749	Structural constituent of ribosome
StLNC0419	PGSC0003DMT400028767	0.988325	0.000200211	Ribulose bisphosphate carboxylase/oxygenase activase 1, chloroplastic
StLNC0419	PGSC0003DMT400028767	0.988325	0.000200211	Ribulose bisphosphate carboxylase/oxygenase activase 1, chloroplastic
StLNC0419	PGSC0003DMT400029670	0.982131	0.000470828	Small nuclear ribonucleoprotein
StLNC0419	PGSC0003DMT400029670	0.982131	0.000470828	Small nuclear ribonucleoprotein
StLNC0419	PGSC0003DMT400029793	0.991021	0.000117918	Hsp90 co-chaperone AHA1
StLNC0419	PGSC0003DMT400029793	0.991021	0.000117918	Hsp90 co-chaperone AHA1
StLNC0419	PGSC0003DMT400030260	0.989388	0.000165199	F-box family protein
StLNC0419	PGSC0003DMT400030260	0.989388	0.000165199	F-box family protein
StLNC0419	PGSC0003DMT400030387	0.981959	0.000479989	Chloroplast small heat shock protein class I
StLNC0419	PGSC0003DMT400030387	0.981959	0.000479989	Chloroplast small heat shock protein class I
StLNC0419	PGSC0003DMT400030649	0.981867	0.00048489	Gene of unknown function
StLNC0419	PGSC0003DMT400030649	0.981867	0.00048489	Gene of unknown function
StLNC0419	PGSC0003DMT400030727	0.990221	0.000140099	Amino acid transporter
StLNC0419	PGSC0003DMT400030727	0.990221	0.000140099	Amino acid transporter
StLNC0419	PGSC0003DMT400031401	0.992266	8.72e-05	APETALA2
StLNC0419	PGSC0003DMT400031401	0.992266	8.72e-05	APETALA2
StLNC0419	PGSC0003DMT400032059	0.987521	0.000228945	Ubiquitin carrier protein
StLNC0419	PGSC0003DMT400032059	0.987521	0.000228945	Ubiquitin carrier protein
StLNC0419	PGSC0003DMT400032275	0.986047	0.000286564	Conserved gene of unknown function
StLNC0419	PGSC0003DMT400032275	0.986047	0.000286564	Conserved gene of unknown function
StLNC0419	PGSC0003DMT400032710	0.986372	0.000273316	Gene of unknown function
StLNC0419	PGSC0003DMT400032710	0.986372	0.000273316	Gene of unknown function
StLNC0419	PGSC0003DMT400032993	0.981857	0.000485448	Gene of unknown function
StLNC0419	PGSC0003DMT400032993	0.981857	0.000485448	Gene of unknown function
StLNC0419	PGSC0003DMT400033013	0.988196	0.000204704	ABA induced plasma membrane protein PM 19
StLNC0419	PGSC0003DMT400033013	0.988196	0.000204704	ABA induced plasma membrane protein PM 19
StLNC0419	PGSC0003DMT400033708	0.987992	0.000211892	Gene of unknown function
StLNC0419	PGSC0003DMT400033708	0.987992	0.000211892	Gene of unknown function
StLNC0419	PGSC0003DMT400034192	0.986699	0.000260294	Ripening induced protein
StLNC0419	PGSC0003DMT400034192	0.986699	0.000260294	Ripening induced protein
StLNC0419	PGSC0003DMT400034522	0.983522	0.000400219	Glycinamide ribonucleotide transformylase
StLNC0419	PGSC0003DMT400034522	0.983522	0.000400219	Glycinamide ribonucleotide transformylase
StLNC0419	PGSC0003DMT400035450	0.98854	0.000192854	RWP-RK domain-containing protein
StLNC0419	PGSC0003DMT400035450	0.98854	0.000192854	RWP-RK domain-containing protein
StLNC0419	PGSC0003DMT400035603	0.992573	8.03e-05	Conserved gene of unknown function
StLNC0419	PGSC0003DMT400035603	0.992573	8.03e-05	Conserved gene of unknown function
StLNC0419	PGSC0003DMT400036145	0.983515	0.000400563	Receptor serine-threonine protein kinase
StLNC0419	PGSC0003DMT400036145	0.983515	0.000400563	Receptor serine-threonine protein kinase
StLNC0419	PGSC0003DMT400036990	0.992617	7.94e-05	Acireductone dioxygenase
StLNC0419	PGSC0003DMT400036990	0.992617	7.94e-05	Acireductone dioxygenase
StLNC0419	PGSC0003DMT400036997	0.981824	0.000487191	Conserved gene of unknown function
StLNC0419	PGSC0003DMT400036997	0.981824	0.000487191	Conserved gene of unknown function
StLNC0419	PGSC0003DMT400038147	0.988855	0.000182345	Nucleotide binding protein
StLNC0419	PGSC0003DMT400038147	0.988855	0.000182345	Nucleotide binding protein
StLNC0419	PGSC0003DMT400039303	0.986638	0.000262671	Histone acetyltransferase
StLNC0419	PGSC0003DMT400039303	0.986638	0.000262671	Histone acetyltransferase
StLNC0419	PGSC0003DMT400039921	0.986169	0.000281556	Paramyosin
StLNC0419	PGSC0003DMT400039921	0.986169	0.000281556	Paramyosin
StLNC0419	PGSC0003DMT400041612	0.983798	0.000386844	Suppressor
StLNC0419	PGSC0003DMT400041612	0.983798	0.000386844	Suppressor
StLNC0419	PGSC0003DMT400042650	0.99563	2.73e-05	Kelch repeat-containing F-box family protein
StLNC0419	PGSC0003DMT400042650	0.99563	2.73e-05	Kelch repeat-containing F-box family protein
StLNC0419	PGSC0003DMT400045629	0.981015	0.000531645	RNA binding protein RZ-1
StLNC0419	PGSC0003DMT400045629	0.981015	0.000531645	RNA binding protein RZ-1
StLNC0419	PGSC0003DMT400045722	0.98912	0.000173712	FtsH protease
StLNC0419	PGSC0003DMT400045722	0.98912	0.000173712	FtsH protease
StLNC0419	PGSC0003DMT400045765	0.985187	0.000323161	Conserved gene of unknown function
StLNC0419	PGSC0003DMT400045765	0.985187	0.000323161	Conserved gene of unknown function
StLNC0419	PGSC0003DMT400045783	0.984226	0.000366617	Cytochrome C oxidase polypeptide vib
StLNC0419	PGSC0003DMT400045783	0.984226	0.000366617	Cytochrome C oxidase polypeptide vib
StLNC0419	PGSC0003DMT400046729	0.983931	0.000380527	Enzyme inhibitor
StLNC0419	PGSC0003DMT400046729	0.983931	0.000380527	Enzyme inhibitor
StLNC0419	PGSC0003DMT400047369	0.983092	0.000421409	Zinc finger protein
StLNC0419	PGSC0003DMT400047369	0.983092	0.000421409	Zinc finger protein
StLNC0419	PGSC0003DMT400047537	0.98594	0.000290983	ABA 8'-hydroxylase CYP707A1
StLNC0419	PGSC0003DMT400047537	0.98594	0.000290983	ABA 8'-hydroxylase CYP707A1
StLNC0419	PGSC0003DMT400048186	0.980914	0.00053732	Ribosomal protein L7/L12 C-terminal domain containing protein
StLNC0419	PGSC0003DMT400048186	0.980914	0.00053732	Ribosomal protein L7/L12 C-terminal domain containing protein
StLNC0419	PGSC0003DMT400049928	0.992876	7.38e-05	24 kDa seed maturation protein
StLNC0419	PGSC0003DMT400049928	0.992876	7.38e-05	24 kDa seed maturation protein
StLNC0419	PGSC0003DMT400050534	0.989249	0.000169581	Chaperonin containing t-complex protein 1, beta subunit, tcpb
StLNC0419	PGSC0003DMT400050534	0.989249	0.000169581	Chaperonin containing t-complex protein 1, beta subunit, tcpb
StLNC0419	PGSC0003DMT400052958	0.98473	0.000343461	CBL-interacting protein kinase 11
StLNC0419	PGSC0003DMT400052958	0.98473	0.000343461	CBL-interacting protein kinase 11
StLNC0419	PGSC0003DMT400053070	0.987469	0.000230862	Rpi-vnt1
StLNC0419	PGSC0003DMT400053070	0.987469	0.000230862	Rpi-vnt1
StLNC0419	PGSC0003DMT400053577	0.998565	2.67e-06	Conserved gene of unknown function
StLNC0419	PGSC0003DMT400053577	0.998565	2.67e-06	Conserved gene of unknown function
StLNC0419	PGSC0003DMT400054127	0.990618	0.000128833	Conserved gene of unknown function
StLNC0419	PGSC0003DMT400054127	0.990618	0.000128833	Conserved gene of unknown function
StLNC0419	PGSC0003DMT400055413	0.983686	0.000392256	Gene of unknown function
StLNC0419	PGSC0003DMT400055413	0.983686	0.000392256	Gene of unknown function
StLNC0419	PGSC0003DMT400055486	0.981103	0.000526729	Gene of unknown function
StLNC0419	PGSC0003DMT400055486	0.981103	0.000526729	Gene of unknown function
StLNC0419	PGSC0003DMT400055766	0.995813	2.5e-05	Conserved gene of unknown function
StLNC0419	PGSC0003DMT400055766	0.995813	2.5e-05	Conserved gene of unknown function
StLNC0419	PGSC0003DMT400055905	0.981569	0.000501007	Thioredoxin h
StLNC0419	PGSC0003DMT400055905	0.981569	0.000501007	Thioredoxin h
StLNC0419	PGSC0003DMT400055930	0.991374	0.000108728	Furin
StLNC0419	PGSC0003DMT400055930	0.991374	0.000108728	Furin
StLNC0419	PGSC0003DMT400055958	0.988385	0.000198164	Class II small heat shock protein Le-HSP17.6
StLNC0419	PGSC0003DMT400055958	0.988385	0.000198164	Class II small heat shock protein Le-HSP17.6
StLNC0419	PGSC0003DMT400057317	0.988767	0.00018525	Oleosin 5
StLNC0419	PGSC0003DMT400057317	0.988767	0.00018525	Oleosin 5
StLNC0419	PGSC0003DMT400057654	0.992533	8.12e-05	TSJT1
StLNC0419	PGSC0003DMT400057654	0.992533	8.12e-05	TSJT1
StLNC0419	PGSC0003DMT400058309	0.988152	0.000206248	Reductase 2
StLNC0419	PGSC0003DMT400058309	0.988152	0.000206248	Reductase 2
StLNC0419	PGSC0003DMT400059705	0.98279	0.000436678	Phospholipase C
StLNC0419	PGSC0003DMT400059705	0.98279	0.000436678	Phospholipase C
StLNC0419	PGSC0003DMT400059945	0.980505	0.000560639	Arginine/serine-rich coiled coil protein
StLNC0419	PGSC0003DMT400059945	0.980505	0.000560639	Arginine/serine-rich coiled coil protein
StLNC0419	PGSC0003DMT400059978	0.985127	0.000325771	MT-A70 family protein
StLNC0419	PGSC0003DMT400059978	0.985127	0.000325771	MT-A70 family protein
StLNC0419	PGSC0003DMT400060276	0.983096	0.000421217	NAC domain protein
StLNC0419	PGSC0003DMT400060276	0.983096	0.000421217	NAC domain protein
StLNC0419	PGSC0003DMT400060724	0.990559	0.000130495	Universal stress protein family protein
StLNC0419	PGSC0003DMT400060724	0.990559	0.000130495	Universal stress protein family protein
StLNC0419	PGSC0003DMT400060736	0.99357	5.9994e-05	Peroxisomal small heat shock protein
StLNC0419	PGSC0003DMT400060736	0.99357	5.9994e-05	Peroxisomal small heat shock protein
StLNC0419	PGSC0003DMT400060759	0.994613	4.19e-05	ATP-dependent RNA helicase
StLNC0419	PGSC0003DMT400060759	0.994613	4.19e-05	ATP-dependent RNA helicase
StLNC0419	PGSC0003DMT400061025	0.981073	0.000528419	Gene of unknown function
StLNC0419	PGSC0003DMT400061025	0.981073	0.000528419	Gene of unknown function
StLNC0419	PGSC0003DMT400061067	0.990369	0.000135833	Ankyrin domain protein
StLNC0419	PGSC0003DMT400061067	0.990369	0.000135833	Ankyrin domain protein
StLNC0419	PGSC0003DMT400061164	0.983791	0.000387222	Armadillo repeat-containing protein
StLNC0419	PGSC0003DMT400061164	0.983791	0.000387222	Armadillo repeat-containing protein
StLNC0419	PGSC0003DMT400061432	0.984155	0.000369952	Conserved gene of unknown function
StLNC0419	PGSC0003DMT400061432	0.984155	0.000369952	Conserved gene of unknown function
StLNC0419	PGSC0003DMT400061433	0.980191	0.000578906	U3 small nucleolar RNA-associated protein
StLNC0419	PGSC0003DMT400061433	0.980191	0.000578906	U3 small nucleolar RNA-associated protein
StLNC0419	PGSC0003DMT400062926	0.981256	0.000518218	IS10 transposase
StLNC0419	PGSC0003DMT400062926	0.981256	0.000518218	IS10 transposase
StLNC0419	PGSC0003DMT400063132	0.988766	0.000185272	Eukaryotic translation initiation factor 5A-5
StLNC0419	PGSC0003DMT400063132	0.988766	0.000185272	Eukaryotic translation initiation factor 5A-5
StLNC0419	PGSC0003DMT400063335	0.980979	0.000533674	Conserved gene of unknown function
StLNC0419	PGSC0003DMT400063335	0.980979	0.000533674	Conserved gene of unknown function
StLNC0419	PGSC0003DMT400063352	0.989718	0.000154986	101 kDa heat shock protein
StLNC0419	PGSC0003DMT400063352	0.989718	0.000154986	101 kDa heat shock protein
StLNC0419	PGSC0003DMT400063543	0.98877	0.000185156	Luminal binding protein
StLNC0419	PGSC0003DMT400063543	0.98877	0.000185156	Luminal binding protein
StLNC0419	PGSC0003DMT400064080	0.994788	3.91e-05	Ubiquitin family protein
StLNC0419	PGSC0003DMT400064080	0.994788	3.91e-05	Ubiquitin family protein
StLNC0419	PGSC0003DMT400064306	0.98123	0.000519659	Tuber-specific and sucrose-responsive element binding factor
StLNC0419	PGSC0003DMT400064306	0.98123	0.000519659	Tuber-specific and sucrose-responsive element binding factor
StLNC0419	PGSC0003DMT400065063	0.988189	0.000204952	L-idonate 5-dehydrogenase
StLNC0419	PGSC0003DMT400065063	0.988189	0.000204952	L-idonate 5-dehydrogenase
StLNC0419	PGSC0003DMT400066123	0.987835	0.000217483	Sterol regulatory element-binding protein site 2 protease
StLNC0419	PGSC0003DMT400066123	0.987835	0.000217483	Sterol regulatory element-binding protein site 2 protease
StLNC0419	PGSC0003DMT400066347	0.982021	0.000476654	Serine-threonine protein kinase, plant-type
StLNC0419	PGSC0003DMT400066347	0.982021	0.000476654	Serine-threonine protein kinase, plant-type
StLNC0419	PGSC0003DMT400066532	0.986714	0.000259685	Seed maturation protein PM23
StLNC0419	PGSC0003DMT400066532	0.986714	0.000259685	Seed maturation protein PM23
StLNC0419	PGSC0003DMT400066536	0.989126	0.000173515	C2H2L domain class transcription factor
StLNC0419	PGSC0003DMT400066536	0.989126	0.000173515	C2H2L domain class transcription factor
StLNC0419	PGSC0003DMT400066559	0.980401	0.000566685	C2 domain-containing protein
StLNC0419	PGSC0003DMT400066559	0.980401	0.000566685	C2 domain-containing protein
StLNC0419	PGSC0003DMT400066765	0.989279	0.000168621	Glycine-rich protein
StLNC0419	PGSC0003DMT400066765	0.989279	0.000168621	Glycine-rich protein
StLNC0419	PGSC0003DMT400067356	0.981679	0.000495048	Conserved gene of unknown function
StLNC0419	PGSC0003DMT400067356	0.981679	0.000495048	Conserved gene of unknown function
StLNC0419	PGSC0003DMT400067485	0.984351	0.000360798	HOS1
StLNC0419	PGSC0003DMT400067485	0.984351	0.000360798	HOS1
StLNC0419	PGSC0003DMT400067526	0.986421	0.000271321	Phospholipase A1
StLNC0419	PGSC0003DMT400067526	0.986421	0.000271321	Phospholipase A1
StLNC0419	PGSC0003DMT400067536	0.980726	0.000548011	Conserved gene of unknown function
StLNC0419	PGSC0003DMT400067536	0.980726	0.000548011	Conserved gene of unknown function
StLNC0419	PGSC0003DMT400068108	0.989044	0.000176155	Glutamine-rich protein
StLNC0419	PGSC0003DMT400068108	0.989044	0.000176155	Glutamine-rich protein
StLNC0419	PGSC0003DMT400068281	0.982632	0.00044474	G10
StLNC0419	PGSC0003DMT400068281	0.982632	0.00044474	G10
StLNC0419	PGSC0003DMT400068320	0.990629	0.000128537	Protein bem46
StLNC0419	PGSC0003DMT400068320	0.990629	0.000128537	Protein bem46
StLNC0419	PGSC0003DMT400068378	0.984	0.000377238	Conserved gene of unknown function
StLNC0419	PGSC0003DMT400068378	0.984	0.000377238	Conserved gene of unknown function
StLNC0419	PGSC0003DMT400068726	0.985899	0.000292702	SKP1 3
StLNC0419	PGSC0003DMT400068726	0.985899	0.000292702	SKP1 3
StLNC0419	PGSC0003DMT400068727	0.982736	0.000439396	SKP1
StLNC0419	PGSC0003DMT400068727	0.982736	0.000439396	SKP1
StLNC0419	PGSC0003DMT400069308	0.984754	0.00034241	Protein kinase
StLNC0419	PGSC0003DMT400069308	0.984754	0.00034241	Protein kinase
StLNC0419	PGSC0003DMT400069476	0.981362	0.000512344	Protein farnesyltransferase/geranylgeranyltransferase type-1 subunit alpha
StLNC0419	PGSC0003DMT400069476	0.981362	0.000512344	Protein farnesyltransferase/geranylgeranyltransferase type-1 subunit alpha
StLNC0419	PGSC0003DMT400069760	0.981014	0.000531714	Phosphoinositide-specific phospholipase C
StLNC0419	PGSC0003DMT400069760	0.981014	0.000531714	Phosphoinositide-specific phospholipase C
StLNC0419	PGSC0003DMT400069888	0.980607	0.000554802	Transcription factor
StLNC0419	PGSC0003DMT400069888	0.980607	0.000554802	Transcription factor
StLNC0419	PGSC0003DMT400071229	0.983125	0.000419795	Auxin:hydrogen symporter
StLNC0419	PGSC0003DMT400071229	0.983125	0.000419795	Auxin:hydrogen symporter
StLNC0419	PGSC0003DMT400071759	0.991279	0.000111163	Gene of unknown function
StLNC0419	PGSC0003DMT400071759	0.991279	0.000111163	Gene of unknown function
StLNC0419	PGSC0003DMT400071820	0.989064	0.0001755	ER lumen retaining receptor family
StLNC0419	PGSC0003DMT400071820	0.989064	0.0001755	ER lumen retaining receptor family
StLNC0419	PGSC0003DMT400072555	0.995918	2.38e-05	Mal d 1-associated protein
StLNC0419	PGSC0003DMT400072555	0.995918	2.38e-05	Mal d 1-associated protein
StLNC0419	PGSC0003DMT400072815	0.996532	1.7e-05	Gene of unknown function
StLNC0419	PGSC0003DMT400072815	0.996532	1.7e-05	Gene of unknown function
StLNC0419	PGSC0003DMT400073144	0.985199	0.00032262	Conserved gene of unknown function
StLNC0419	PGSC0003DMT400073144	0.985199	0.00032262	Conserved gene of unknown function
StLNC0419	PGSC0003DMT400073501	0.981593	0.000499714	Gibberellin receptor GID1
StLNC0419	PGSC0003DMT400073501	0.981593	0.000499714	Gibberellin receptor GID1
StLNC0419	PGSC0003DMT400074141	0.990577	0.000129978	Glycine rich protein-interacting protein
StLNC0419	PGSC0003DMT400074141	0.990577	0.000129978	Glycine rich protein-interacting protein
StLNC0419	PGSC0003DMT400075614	0.99046	0.00013326	Conserved gene of unknown function
StLNC0419	PGSC0003DMT400075614	0.99046	0.00013326	Conserved gene of unknown function
StLNC0419	PGSC0003DMT400076858	0.984508	0.000353584	Cytochrome P450 hydroxylase
StLNC0419	PGSC0003DMT400076858	0.984508	0.000353584	Cytochrome P450 hydroxylase
StLNC0419	PGSC0003DMT400076932	0.985622	0.000304368	GRAS9
StLNC0419	PGSC0003DMT400076932	0.985622	0.000304368	GRAS9
StLNC0419	PGSC0003DMT400078007	0.989091	0.000174638	17.6 kD class I small heat shock protein
StLNC0419	PGSC0003DMT400078007	0.989091	0.000174638	17.6 kD class I small heat shock protein
StLNC0419	PGSC0003DMT400078517	0.980872	0.000539731	Phosphatidylserine synthase
StLNC0419	PGSC0003DMT400078517	0.980872	0.000539731	Phosphatidylserine synthase
StLNC0419	PGSC0003DMT400078745	0.986126	0.00028331	DNA ligase
StLNC0419	PGSC0003DMT400078745	0.986126	0.00028331	DNA ligase
StLNC0419	PGSC0003DMT400079117	0.98145	0.00050749	Membrane protein PB1A10.07c
StLNC0419	PGSC0003DMT400079117	0.98145	0.00050749	Membrane protein PB1A10.07c
StLNC0419	PGSC0003DMT400079159	0.983369	0.000407675	Conserved gene of unknown function
StLNC0419	PGSC0003DMT400079159	0.983369	0.000407675	Conserved gene of unknown function
StLNC0419	PGSC0003DMT400079207	0.983498	0.00040138	Phi-1 protein
StLNC0419	PGSC0003DMT400079207	0.983498	0.00040138	Phi-1 protein
StLNC0419	PGSC0003DMT400079208	0.984087	0.000373149	Phi-1 protein
StLNC0419	PGSC0003DMT400079208	0.984087	0.000373149	Phi-1 protein
StLNC0419	PGSC0003DMT400079209	0.981475	0.00050617	Phi-1 protein
StLNC0419	PGSC0003DMT400079209	0.981475	0.00050617	Phi-1 protein
StLNC0419	PGSC0003DMT400079887	0.983113	0.000420406	3-hydroxyisobutyrate dehydrogenase
StLNC0419	PGSC0003DMT400079887	0.983113	0.000420406	3-hydroxyisobutyrate dehydrogenase
StLNC0419	PGSC0003DMT400080158	0.985761	0.000298493	Conserved gene of unknown function
StLNC0419	PGSC0003DMT400080158	0.985761	0.000298493	Conserved gene of unknown function
StLNC0419	PGSC0003DMT400080800	0.991343	0.000109536	Leucine-rich repeat family protein
StLNC0419	PGSC0003DMT400080800	0.991343	0.000109536	Leucine-rich repeat family protein
StLNC0419	PGSC0003DMT400081223	0.98617	0.000281497	Protein SIS1
StLNC0419	PGSC0003DMT400081223	0.98617	0.000281497	Protein SIS1
StLNC0419	PGSC0003DMT400081478	0.986872	0.000253524	Stress-associated protein 3
StLNC0419	PGSC0003DMT400081478	0.986872	0.000253524	Stress-associated protein 3
StLNC0419	PGSC0003DMT400081752	0.98619	0.000280687	Conserved gene of unknown function
StLNC0419	PGSC0003DMT400081752	0.98619	0.000280687	Conserved gene of unknown function
StLNC0419	PGSC0003DMT400081754	0.992216	8.84e-05	RRNA methylase
StLNC0419	PGSC0003DMT400081754	0.992216	8.84e-05	RRNA methylase
StLNC0419	PGSC0003DMT400083079	0.992508	8.18e-05	EMB514
StLNC0419	PGSC0003DMT400083079	0.992508	8.18e-05	EMB514
StLNC0419	PGSC0003DMT400084737	0.982141	0.000470303	Conserved gene of unknown function
StLNC0419	PGSC0003DMT400084737	0.982141	0.000470303	Conserved gene of unknown function
StLNC0419	PGSC0003DMT400091458	0.98458	0.000350306	Bcl-2-associated athanogene
StLNC0419	PGSC0003DMT400091458	0.98458	0.000350306	Bcl-2-associated athanogene
StLNC0419	PGSC0003DMT400093269	0.980222	0.000577058	Conserved gene of unknown function
StLNC0419	PGSC0003DMT400093269	0.980222	0.000577058	Conserved gene of unknown function
StLNC0419	PGSC0003DMT400094318	0.984143	0.000370487	Avr9/Cf-9 rapidly elicited protein 65
StLNC0419	PGSC0003DMT400094318	0.984143	0.000370487	Avr9/Cf-9 rapidly elicited protein 65
StLNC0419	PGSC0003DMT400097756	0.981147	0.000524281	Structural constituent of cell wall
StLNC0419	PGSC0003DMT400097756	0.981147	0.000524281	Structural constituent of cell wall
StLNC1586	PGSC0003DMT400000536	0.987934	0.000213953	Ferric-chelate reductase
StLNC1586	PGSC0003DMT400000553	0.983346	0.000408846	1-aminocyclopropane-1-carboxylate synthase 2
StLNC1586	PGSC0003DMT400002019	0.986992	0.000248882	Patatin 3
StLNC1586	PGSC0003DMT400002606	0.996764	1.47e-05	Conserved gene of unknown function
StLNC1586	PGSC0003DMT400005012	0.983078	0.000422121	NBS-coding resistance gene analog
StLNC1586	PGSC0003DMT400005040	0.996474	1.76e-05	Disease resistance protein BS2
StLNC1586	PGSC0003DMT400005156	0.984368	0.000360016	Kinase
StLNC1586	PGSC0003DMT400005546	0.982354	0.000459158	Glutathione S-transferase
StLNC1586	PGSC0003DMT400005557	0.994747	3.98e-05	Glutathione S-transferase
StLNC1586	PGSC0003DMT400005558	0.986114	0.000283811	Glutathione S-transferase
StLNC1586	PGSC0003DMT400006594	0.994489	4.39e-05	Coatomer subunit beta'-2
StLNC1586	PGSC0003DMT400007465	0.983703	0.000391417	Conserved gene of unknown function
StLNC1586	PGSC0003DMT400009991	0.995068	3.5e-05	Serine protease
StLNC1586	PGSC0003DMT400010044	0.994818	3.87e-05	P69E protein
StLNC1586	PGSC0003DMT400010052	0.992187	8.9e-05	P69E protein
StLNC1586	PGSC0003DMT400010056	0.987731	0.000221257	Serine protease
StLNC1586	PGSC0003DMT400010866	0.981407	0.000509858	HMG-CoA synthase
StLNC1586	PGSC0003DMT400010891	0.993206	6.71e-05	Thaumatin
StLNC1586	PGSC0003DMT400010970	0.983392	0.00040656	Disease resistance protein Gpa2
StLNC1586	PGSC0003DMT400011261	0.985039	0.000329649	Protein kinase 1b
StLNC1586	PGSC0003DMT400015179	0.986257	0.000277951	Spotted leaf protein
StLNC1586	PGSC0003DMT400015703	0.986392	0.000272512	Membrane protein
StLNC1586	PGSC0003DMT400016302	0.995038	3.54e-05	Cytochrome P450 92B1
StLNC1586	PGSC0003DMT400018916	0.992372	8.48e-05	Vacuolar sorting receptor
StLNC1586	PGSC0003DMT400019469	0.982827	0.000434787	Conserved gene of unknown function
StLNC1586	PGSC0003DMT400020893	0.992412	8.39e-05	Cyclic nucleotide-gated ion channel 15
StLNC1586	PGSC0003DMT400020922	0.981814	0.000487734	KiTH-2
StLNC1586	PGSC0003DMT400021089	0.996401	1.83e-05	AT-HSFB3 (Arabidopsis thaliana heat shock transcription factor B3)
StLNC1586	PGSC0003DMT400021318	0.989828	0.000151664	CYP72A54
StLNC1586	PGSC0003DMT400024894	0.9818	0.000488483	Cytochrome P450
StLNC1586	PGSC0003DMT400025371	0.987264	0.00023851	Conserved gene of unknown function
StLNC1586	PGSC0003DMT400026783	0.984629	0.000348073	Conserved gene of unknown function
StLNC1586	PGSC0003DMT400027198	0.98736	0.000234925	Acidic class II 1,3-beta-glucanase
StLNC1586	PGSC0003DMT400027202	0.988206	0.000204352	Acidic class II 1,3-beta-glucanase
StLNC1586	PGSC0003DMT400028158	0.991164	0.000114154	Lipoxygenase
StLNC1586	PGSC0003DMT400034143	0.996604	1.63e-05	Lectin
StLNC1586	PGSC0003DMT400034819	0.981001	0.000532443	ATP binding protein
StLNC1586	PGSC0003DMT400036349	0.983192	0.000416461	TMV induced protein 1-2
StLNC1586	PGSC0003DMT400037897	0.996322	1.92e-05	Conserved gene of unknown function
StLNC1586	PGSC0003DMT400037981	0.985883	0.000293383	Conserved gene of unknown function
StLNC1586	PGSC0003DMT400038207	0.990119	0.000143039	Serine-threonine protein kinase, plant-type
StLNC1586	PGSC0003DMT400038710	0.985265	0.00031976	Acyltransferase
StLNC1586	PGSC0003DMT400039854	0.988882	0.000181448	Triacylglycerol lipase
StLNC1586	PGSC0003DMT400046711	0.983529	0.000399857	Cytochrome P450 71A4
StLNC1586	PGSC0003DMT400046934	0.983121	0.000420001	Conserved gene of unknown function
StLNC1586	PGSC0003DMT400046973	0.989904	0.000149389	Vetispiradiene synthase 1
StLNC1586	PGSC0003DMT400047089	0.989914	0.000149092	Vetispiradiene synthase
StLNC1586	PGSC0003DMT400049886	0.992214	8.84e-05	Phenylalanine ammonia-lyase
StLNC1586	PGSC0003DMT400052057	0.987097	0.000244849	WRKY transcription factor-b
StLNC1586	PGSC0003DMT400054502	0.990499	0.000132153	Alcohol dehydrogenase
StLNC1586	PGSC0003DMT400055156	0.989857	0.000150794	Phytosulfokine peptide
StLNC1586	PGSC0003DMT400056685	0.99061	0.000129073	DNA binding protein
StLNC1586	PGSC0003DMT400062033	0.980054	0.000586954	PAE
StLNC1586	PGSC0003DMT400062333	0.986144	0.000282558	Receptor protein kinase zmpk1
StLNC1586	PGSC0003DMT400062356	0.992063	9.19e-05	Conserved gene of unknown function
StLNC1586	PGSC0003DMT400063083	0.987499	0.000229748	ATEXO70E2
StLNC1586	PGSC0003DMT400065438	0.982193	0.000467561	Gene of unknown function
StLNC1586	PGSC0003DMT400067222	0.993927	5.34e-05	Flotillin-1
StLNC1586	PGSC0003DMT400067264	0.982639	0.000444368	S-locus-specific glycoprotein S6
StLNC1586	PGSC0003DMT400070213	0.991971	9.41e-05	Glycosyltransferase
StLNC1586	PGSC0003DMT400070362	0.986601	0.000264139	Transferase, transferring glycosyl groups
StLNC1586	PGSC0003DMT400072405	0.990949	0.000119838	Phytosulfokine peptide
StLNC1586	PGSC0003DMT400073599	0.989284	0.000168456	Conserved gene of unknown function
StLNC1586	PGSC0003DMT400075376	0.986319	0.000275428	Conserved gene of unknown function
StLNC1586	PGSC0003DMT400076209	0.996737	1.5e-05	Pleiotropic drug resistance protein 1
StLNC1586	PGSC0003DMT400077223	0.980006	0.000589752	Receptor protein kinase
StLNC1586	PGSC0003DMT400079244	0.987044	0.000246866	Plastid-targeted protein 2
StLNC1586	PGSC0003DMT400080052	0.986671	0.000261379	PRA1 family protein F3
StLNC1586	PGSC0003DMT400081450	0.980293	0.00057295	2-Hydroxyisoflavanone dehydratase
StLNC1586	PGSC0003DMT400081462	0.995071	3.49e-05	Conserved gene of unknown function
StLNC1586	PGSC0003DMT400081921	0.982872	0.000432486	Conserved gene of unknown function
StLNC1586	PGSC0003DMT400082749	0.98467	0.000346202	Calmodulin-binding protein
StLNC1586	PGSC0003DMT400083859	0.996577	1.65e-05	Fatty acid desaturase
StLNC1586	PGSC0003DMT400085219	0.990927	0.00012041	P69B protein
StLNC1586	PGSC0003DMT400085907	0.982392	0.00045717	Conserved gene of unknown function
StLNC1586	PGSC0003DMT400092081	0.993129	6.86e-05	Microsomal oleic acid desaturase
StLNC1586	PGSC0003DMT400094600	0.983541	0.000399297	P69E protein
StLNC1586	PGSC0003DMT400095664	0.993298	6.53e-05	P69E protein
StLNC0062	PGSC0003DMT400000299	0.981005	0.000532211	Gene of unknown function
StLNC0062	PGSC0003DMT400000299	0.981005	0.000532211	Gene of unknown function
StLNC0062	PGSC0003DMT400000310	0.986826	0.000255291	Ubiquitin family protein
StLNC0062	PGSC0003DMT400000310	0.986826	0.000255291	Ubiquitin family protein
StLNC0062	PGSC0003DMT400000946	0.985845	0.000294957	Arginyl-tRNA synthetase
StLNC0062	PGSC0003DMT400000946	0.985845	0.000294957	Arginyl-tRNA synthetase
StLNC0062	PGSC0003DMT400000985	0.987255	0.000238853	GAMYB-binding protein
StLNC0062	PGSC0003DMT400000985	0.987255	0.000238853	GAMYB-binding protein
StLNC0062	PGSC0003DMT400001077	0.984023	0.000376157	RNA processing factor 1
StLNC0062	PGSC0003DMT400001077	0.984023	0.000376157	RNA processing factor 1
StLNC0062	PGSC0003DMT400001470	0.99582	2.49e-05	Pentatricopeptide repeat-containing protein
StLNC0062	PGSC0003DMT400001470	0.99582	2.49e-05	Pentatricopeptide repeat-containing protein
StLNC0062	PGSC0003DMT400001530	0.986104	0.000284204	Conserved gene of unknown function
StLNC0062	PGSC0003DMT400001530	0.986104	0.000284204	Conserved gene of unknown function
StLNC0062	PGSC0003DMT400001661	0.982578	0.000447539	Nucleosome-binding protein
StLNC0062	PGSC0003DMT400001661	0.982578	0.000447539	Nucleosome-binding protein
StLNC0062	PGSC0003DMT400001813	0.980093	0.000584628	Metallocarboxypeptidase inhibitor
StLNC0062	PGSC0003DMT400001813	0.980093	0.000584628	Metallocarboxypeptidase inhibitor
StLNC0062	PGSC0003DMT400001865	0.989391	0.000165108	Transcription regulatory protein SWI3
StLNC0062	PGSC0003DMT400001865	0.989391	0.000165108	Transcription regulatory protein SWI3
StLNC0062	PGSC0003DMT400002160	0.989849	0.000151042	Gc-rich sequence DNA-binding factor
StLNC0062	PGSC0003DMT400002160	0.989849	0.000151042	Gc-rich sequence DNA-binding factor
StLNC0062	PGSC0003DMT400002375	0.992918	7.3e-05	AP2/ERF domain-containing transcription factor
StLNC0062	PGSC0003DMT400002375	0.992918	7.3e-05	AP2/ERF domain-containing transcription factor
StLNC0062	PGSC0003DMT400003784	0.980505	0.000560676	Auxin-responsive protein IAA13
StLNC0062	PGSC0003DMT400003784	0.980505	0.000560676	Auxin-responsive protein IAA13
StLNC0062	PGSC0003DMT400003794	0.992645	7.88e-05	Conserved gene of unknown function
StLNC0062	PGSC0003DMT400003794	0.992645	7.88e-05	Conserved gene of unknown function
StLNC0062	PGSC0003DMT400003893	0.989234	0.000170041	Conserved gene of unknown function
StLNC0062	PGSC0003DMT400003893	0.989234	0.000170041	Conserved gene of unknown function
StLNC0062	PGSC0003DMT400003907	0.981557	0.000501686	Conserved gene of unknown function
StLNC0062	PGSC0003DMT400003907	0.981557	0.000501686	Conserved gene of unknown function
StLNC0062	PGSC0003DMT400004063	0.994121	4.9995e-05	Conserved gene of unknown function
StLNC0062	PGSC0003DMT400004063	0.994121	4.9995e-05	Conserved gene of unknown function
StLNC0062	PGSC0003DMT400004086	0.984092	0.000372905	Auxin-induced SAUR
StLNC0062	PGSC0003DMT400004086	0.984092	0.000372905	Auxin-induced SAUR
StLNC0062	PGSC0003DMT400004778	0.986631	0.00026294	Conserved gene of unknown function
StLNC0062	PGSC0003DMT400004778	0.986631	0.00026294	Conserved gene of unknown function
StLNC0062	PGSC0003DMT400005064	0.989354	0.000166257	BZIP protein
StLNC0062	PGSC0003DMT400005064	0.989354	0.000166257	BZIP protein
StLNC0062	PGSC0003DMT400005236	0.983829	0.000385389	Protein PPLZ12
StLNC0062	PGSC0003DMT400005236	0.983829	0.000385389	Protein PPLZ12
StLNC0062	PGSC0003DMT400005512	0.984655	0.000346893	Zinc finger protein
StLNC0062	PGSC0003DMT400005512	0.984655	0.000346893	Zinc finger protein
StLNC0062	PGSC0003DMT400006527	0.989276	0.000168709	Cytoplasmic dynein light chain
StLNC0062	PGSC0003DMT400006527	0.989276	0.000168709	Cytoplasmic dynein light chain
StLNC0062	PGSC0003DMT400006812	0.980206	0.000578019	Ran-binding protein
StLNC0062	PGSC0003DMT400006812	0.980206	0.000578019	Ran-binding protein
StLNC0062	PGSC0003DMT400006974	0.983254	0.000413377	Iron-sulfur cluster assembly protein
StLNC0062	PGSC0003DMT400006974	0.983254	0.000413377	Iron-sulfur cluster assembly protein
StLNC0062	PGSC0003DMT400007024	0.980825	0.000542385	Gene of unknown function
StLNC0062	PGSC0003DMT400007024	0.980825	0.000542385	Gene of unknown function
StLNC0062	PGSC0003DMT400007183	0.997279	1.03e-05	Small GTP-binding protein Sar1BNt
StLNC0062	PGSC0003DMT400007183	0.997279	1.03e-05	Small GTP-binding protein Sar1BNt
StLNC0062	PGSC0003DMT400007325	0.984575	0.000350531	Eukaryotic translation initiation factor 5A-4
StLNC0062	PGSC0003DMT400007325	0.984575	0.000350531	Eukaryotic translation initiation factor 5A-4
StLNC0062	PGSC0003DMT400007434	0.996106	2.16e-05	Sn-1 protein
StLNC0062	PGSC0003DMT400007434	0.996106	2.16e-05	Sn-1 protein
StLNC0062	PGSC0003DMT400007737	0.988885	0.00018135	Regulator of gene silencing
StLNC0062	PGSC0003DMT400007737	0.988885	0.00018135	Regulator of gene silencing
StLNC0062	PGSC0003DMT400007742	0.993088	6.95e-05	Cellular nucleic acid binding protein
StLNC0062	PGSC0003DMT400007742	0.993088	6.95e-05	Cellular nucleic acid binding protein
StLNC0062	PGSC0003DMT400007765	0.98877	0.000185147	GTP-binding family protein
StLNC0062	PGSC0003DMT400007765	0.98877	0.000185147	GTP-binding family protein
StLNC0062	PGSC0003DMT400008404	0.991668	0.000101384	Gene of unknown function
StLNC0062	PGSC0003DMT400008404	0.991668	0.000101384	Gene of unknown function
StLNC0062	PGSC0003DMT400009451	0.983362	0.00040806	3-ketoacyl-CoA synthase
StLNC0062	PGSC0003DMT400009451	0.983362	0.00040806	3-ketoacyl-CoA synthase
StLNC0062	PGSC0003DMT400010000	0.989808	0.000152273	Acc synthase
StLNC0062	PGSC0003DMT400010000	0.989808	0.000152273	Acc synthase
StLNC0062	PGSC0003DMT400010099	0.983918	0.000381146	Conserved gene of unknown function
StLNC0062	PGSC0003DMT400010099	0.983918	0.000381146	Conserved gene of unknown function
StLNC0062	PGSC0003DMT400010803	0.983657	0.000393657	Sugar transporter
StLNC0062	PGSC0003DMT400010803	0.983657	0.000393657	Sugar transporter
StLNC0062	PGSC0003DMT400010881	0.987977	0.000212429	F-box family protein
StLNC0062	PGSC0003DMT400010881	0.987977	0.000212429	F-box family protein
StLNC0062	PGSC0003DMT400011470	0.992538	8.11e-05	BRASSINAZOLE-RESISTANT 1 protein
StLNC0062	PGSC0003DMT400011470	0.992538	8.11e-05	BRASSINAZOLE-RESISTANT 1 protein
StLNC0062	PGSC0003DMT400011762	0.992381	8.46e-05	Invertase inhibitor
StLNC0062	PGSC0003DMT400011762	0.992381	8.46e-05	Invertase inhibitor
StLNC0062	PGSC0003DMT400012169	0.990366	0.000135914	Pre-mRNA processing ribonucleoprotein, binding region
StLNC0062	PGSC0003DMT400012169	0.990366	0.000135914	Pre-mRNA processing ribonucleoprotein, binding region
StLNC0062	PGSC0003DMT400012849	0.992268	8.72e-05	RING-H2 finger protein RHG1a
StLNC0062	PGSC0003DMT400012849	0.992268	8.72e-05	RING-H2 finger protein RHG1a
StLNC0062	PGSC0003DMT400012873	0.996266	1.98e-05	Crooked neck protein
StLNC0062	PGSC0003DMT400012873	0.996266	1.98e-05	Crooked neck protein
StLNC0062	PGSC0003DMT400013036	0.991285	0.000111028	Nuclear acid binding protein
StLNC0062	PGSC0003DMT400013036	0.991285	0.000111028	Nuclear acid binding protein
StLNC0062	PGSC0003DMT400013135	0.987707	0.000222121	Conserved gene of unknown function
StLNC0062	PGSC0003DMT400013135	0.987707	0.000222121	Conserved gene of unknown function
StLNC0062	PGSC0003DMT400013942	0.990873	0.000121874	Protein phosphatase 2c
StLNC0062	PGSC0003DMT400013942	0.990873	0.000121874	Protein phosphatase 2c
StLNC0062	PGSC0003DMT400014351	0.992086	9.14e-05	Conserved gene of unknown function
StLNC0062	PGSC0003DMT400014351	0.992086	9.14e-05	Conserved gene of unknown function
StLNC0062	PGSC0003DMT400015895	0.980393	0.000567156	Gene of unknown function
StLNC0062	PGSC0003DMT400015895	0.980393	0.000567156	Gene of unknown function
StLNC0062	PGSC0003DMT400015910	0.987077	0.000245622	Conserved gene of unknown function
StLNC0062	PGSC0003DMT400015910	0.987077	0.000245622	Conserved gene of unknown function
StLNC0062	PGSC0003DMT400015931	0.993521	6.09e-05	Gene of unknown function
StLNC0062	PGSC0003DMT400015931	0.993521	6.09e-05	Gene of unknown function
StLNC0062	PGSC0003DMT400016318	0.984317	0.000362378	Gene of unknown function
StLNC0062	PGSC0003DMT400016318	0.984317	0.000362378	Gene of unknown function
StLNC0062	PGSC0003DMT400016348	0.981317	0.00051485	Conserved gene of unknown function
StLNC0062	PGSC0003DMT400016348	0.981317	0.00051485	Conserved gene of unknown function
StLNC0062	PGSC0003DMT400016577	0.989863	0.000150617	SAM domain family protein
StLNC0062	PGSC0003DMT400016577	0.989863	0.000150617	SAM domain family protein
StLNC0062	PGSC0003DMT400016998	0.989567	0.000159627	Spotted leaf protein
StLNC0062	PGSC0003DMT400016998	0.989567	0.000159627	Spotted leaf protein
StLNC0062	PGSC0003DMT400017538	0.991769	9.89e-05	NBS-LRR protein
StLNC0062	PGSC0003DMT400017538	0.991769	9.89e-05	NBS-LRR protein
StLNC0062	PGSC0003DMT400018543	0.995066	3.5e-05	R3h domain containing protein
StLNC0062	PGSC0003DMT400018543	0.995066	3.5e-05	R3h domain containing protein
StLNC0062	PGSC0003DMT400018982	0.985077	0.00032799	Heterogeneous nuclear ribonucleoprotein
StLNC0062	PGSC0003DMT400018982	0.985077	0.00032799	Heterogeneous nuclear ribonucleoprotein
StLNC0062	PGSC0003DMT400020315	0.984918	0.000335063	Ribosomal protein L11
StLNC0062	PGSC0003DMT400020315	0.984918	0.000335063	Ribosomal protein L11
StLNC0062	PGSC0003DMT400020487	0.985726	0.000299974	Gene of unknown function
StLNC0062	PGSC0003DMT400020487	0.985726	0.000299974	Gene of unknown function
StLNC0062	PGSC0003DMT400020777	0.988669	0.000188508	Gene of unknown function
StLNC0062	PGSC0003DMT400020777	0.988669	0.000188508	Gene of unknown function
StLNC0062	PGSC0003DMT400020825	0.994662	4.11e-05	Bel1 homeotic protein
StLNC0062	PGSC0003DMT400020825	0.994662	4.11e-05	Bel1 homeotic protein
StLNC0062	PGSC0003DMT400021142	0.985655	0.000302973	Class II small heat shock protein Le-HSP17.6
StLNC0062	PGSC0003DMT400021142	0.985655	0.000302973	Class II small heat shock protein Le-HSP17.6
StLNC0062	PGSC0003DMT400022169	0.99012	0.000143011	Conserved gene of unknown function
StLNC0062	PGSC0003DMT400022169	0.99012	0.000143011	Conserved gene of unknown function
StLNC0062	PGSC0003DMT400022649	0.980651	0.000552249	Conserved gene of unknown function
StLNC0062	PGSC0003DMT400022649	0.980651	0.000552249	Conserved gene of unknown function
StLNC0062	PGSC0003DMT400022663	0.993062	6.9993e-05	Ferritin
StLNC0062	PGSC0003DMT400022663	0.993062	6.9993e-05	Ferritin
StLNC0062	PGSC0003DMT400022875	0.983826	0.000385505	Conserved gene of unknown function
StLNC0062	PGSC0003DMT400022875	0.983826	0.000385505	Conserved gene of unknown function
StLNC0062	PGSC0003DMT400022899	0.993709	5.74e-05	Conserved gene of unknown function
StLNC0062	PGSC0003DMT400022899	0.993709	5.74e-05	Conserved gene of unknown function
StLNC0062	PGSC0003DMT400023003	0.994275	4.74e-05	Gene of unknown function
StLNC0062	PGSC0003DMT400023003	0.994275	4.74e-05	Gene of unknown function
StLNC0062	PGSC0003DMT400023348	0.986022	0.000287596	Conserved gene of unknown function
StLNC0062	PGSC0003DMT400023348	0.986022	0.000287596	Conserved gene of unknown function
StLNC0062	PGSC0003DMT400024508	0.992527	8.14e-05	Dehydration-responsive element binding protein 3
StLNC0062	PGSC0003DMT400024508	0.992527	8.14e-05	Dehydration-responsive element binding protein 3
StLNC0062	PGSC0003DMT400024580	0.980115	0.000583383	Conserved gene of unknown function
StLNC0062	PGSC0003DMT400024580	0.980115	0.000583383	Conserved gene of unknown function
StLNC0062	PGSC0003DMT400024799	0.989708	0.000155294	Zinc finger protein PIF1
StLNC0062	PGSC0003DMT400024799	0.989708	0.000155294	Zinc finger protein PIF1
StLNC0062	PGSC0003DMT400025116	0.980645	0.000552641	Purine transporter
StLNC0062	PGSC0003DMT400025116	0.980645	0.000552641	Purine transporter
StLNC0062	PGSC0003DMT400026134	0.981312	0.000515088	Pentatricopeptide repeat-containing protein
StLNC0062	PGSC0003DMT400026134	0.981312	0.000515088	Pentatricopeptide repeat-containing protein
StLNC0062	PGSC0003DMT400026232	0.98523	0.000321259	Hydroxyproline-rich glycoprotein family protein
StLNC0062	PGSC0003DMT400026232	0.98523	0.000321259	Hydroxyproline-rich glycoprotein family protein
StLNC0062	PGSC0003DMT400026377	0.99645	1.78e-05	DNA-binding protein RHL1
StLNC0062	PGSC0003DMT400026377	0.99645	1.78e-05	DNA-binding protein RHL1
StLNC0062	PGSC0003DMT400027356	0.982348	0.00045947	Activator of basal transcription
StLNC0062	PGSC0003DMT400027356	0.982348	0.00045947	Activator of basal transcription
StLNC0062	PGSC0003DMT400027542	0.981544	0.000502363	E3 ubiquitin ligase PUB14
StLNC0062	PGSC0003DMT400027542	0.981544	0.000502363	E3 ubiquitin ligase PUB14
StLNC0062	PGSC0003DMT400027645	0.980217	0.000577346	Conserved gene of unknown function
StLNC0062	PGSC0003DMT400027645	0.980217	0.000577346	Conserved gene of unknown function
StLNC0062	PGSC0003DMT400027828	0.982874	0.000432419	Salt responsive protein 2
StLNC0062	PGSC0003DMT400027828	0.982874	0.000432419	Salt responsive protein 2
StLNC0062	PGSC0003DMT400027905	0.980945	0.000535579	Uro-adherence factor A
StLNC0062	PGSC0003DMT400027905	0.980945	0.000535579	Uro-adherence factor A
StLNC0062	PGSC0003DMT400028007	0.987617	0.00022541	Gene of unknown function
StLNC0062	PGSC0003DMT400028007	0.987617	0.00022541	Gene of unknown function
StLNC0062	PGSC0003DMT400028574	0.989691	0.000155833	Structural constituent of ribosome
StLNC0062	PGSC0003DMT400028574	0.989691	0.000155833	Structural constituent of ribosome
StLNC0062	PGSC0003DMT400028767	0.981695	0.000494185	Ribulose bisphosphate carboxylase/oxygenase activase 1, chloroplastic
StLNC0062	PGSC0003DMT400028767	0.981695	0.000494185	Ribulose bisphosphate carboxylase/oxygenase activase 1, chloroplastic
StLNC0062	PGSC0003DMT400030260	0.990247	0.000139328	F-box family protein
StLNC0062	PGSC0003DMT400030260	0.990247	0.000139328	F-box family protein
StLNC0062	PGSC0003DMT400030381	0.981941	0.000480958	Chloroplast small heat shock protein class I
StLNC0062	PGSC0003DMT400030381	0.981941	0.000480958	Chloroplast small heat shock protein class I
StLNC0062	PGSC0003DMT400030382	0.989051	0.000175939	Chloroplast small heat shock protein class I
StLNC0062	PGSC0003DMT400030382	0.989051	0.000175939	Chloroplast small heat shock protein class I
StLNC0062	PGSC0003DMT400030649	0.993963	5.28e-05	Gene of unknown function
StLNC0062	PGSC0003DMT400030649	0.993963	5.28e-05	Gene of unknown function
StLNC0062	PGSC0003DMT400030727	0.997094	1.18e-05	Amino acid transporter
StLNC0062	PGSC0003DMT400030727	0.997094	1.18e-05	Amino acid transporter
StLNC0062	PGSC0003DMT400031401	0.986127	0.000283268	APETALA2
StLNC0062	PGSC0003DMT400031401	0.986127	0.000283268	APETALA2
StLNC0062	PGSC0003DMT400032059	0.988878	0.000181577	Ubiquitin carrier protein
StLNC0062	PGSC0003DMT400032059	0.988878	0.000181577	Ubiquitin carrier protein
StLNC0062	PGSC0003DMT400032117	0.996322	1.92e-05	Vesicle docking protein P115
StLNC0062	PGSC0003DMT400032117	0.996322	1.92e-05	Vesicle docking protein P115
StLNC0062	PGSC0003DMT400032275	0.981838	0.000486433	Conserved gene of unknown function
StLNC0062	PGSC0003DMT400032275	0.981838	0.000486433	Conserved gene of unknown function
StLNC0062	PGSC0003DMT400032710	0.992466	8.27e-05	Gene of unknown function
StLNC0062	PGSC0003DMT400032710	0.992466	8.27e-05	Gene of unknown function
StLNC0062	PGSC0003DMT400032760	0.984932	0.000334434	Chaperone protein DNAj
StLNC0062	PGSC0003DMT400032760	0.984932	0.000334434	Chaperone protein DNAj
StLNC0062	PGSC0003DMT400033081	0.980159	0.000580762	U4/U6 small nuclear ribonucleoprotein Prp4
StLNC0062	PGSC0003DMT400033081	0.980159	0.000580762	U4/U6 small nuclear ribonucleoprotein Prp4
StLNC0062	PGSC0003DMT400033708	0.993719	5.72e-05	Gene of unknown function
StLNC0062	PGSC0003DMT400033708	0.993719	5.72e-05	Gene of unknown function
StLNC0062	PGSC0003DMT400035450	0.987925	0.000214276	RWP-RK domain-containing protein
StLNC0062	PGSC0003DMT400035450	0.987925	0.000214276	RWP-RK domain-containing protein
StLNC0062	PGSC0003DMT400035513	0.987112	0.000244294	Gene of unknown function
StLNC0062	PGSC0003DMT400035513	0.987112	0.000244294	Gene of unknown function
StLNC0062	PGSC0003DMT400035603	0.994171	4.92e-05	Conserved gene of unknown function
StLNC0062	PGSC0003DMT400035603	0.994171	4.92e-05	Conserved gene of unknown function
StLNC0062	PGSC0003DMT400036075	0.984864	0.000337447	COP1 homolog
StLNC0062	PGSC0003DMT400036075	0.984864	0.000337447	COP1 homolog
StLNC0062	PGSC0003DMT400036145	0.980761	0.000546	Receptor serine-threonine protein kinase
StLNC0062	PGSC0003DMT400036145	0.980761	0.000546	Receptor serine-threonine protein kinase
StLNC0062	PGSC0003DMT400037355	0.993464	6.2e-05	Extracellular ligand-gated ion channel
StLNC0062	PGSC0003DMT400037355	0.993464	6.2e-05	Extracellular ligand-gated ion channel
StLNC0062	PGSC0003DMT400038147	0.997556	8.24e-06	Nucleotide binding protein
StLNC0062	PGSC0003DMT400038147	0.997556	8.24e-06	Nucleotide binding protein
StLNC0062	PGSC0003DMT400038834	0.98775	0.000220577	C2
StLNC0062	PGSC0003DMT400038834	0.98775	0.000220577	C2
StLNC0062	PGSC0003DMT400039303	0.982103	0.000472352	Histone acetyltransferase
StLNC0062	PGSC0003DMT400039303	0.982103	0.000472352	Histone acetyltransferase
StLNC0062	PGSC0003DMT400039921	0.983559	0.000398395	Paramyosin
StLNC0062	PGSC0003DMT400039921	0.983559	0.000398395	Paramyosin
StLNC0062	PGSC0003DMT400041169	0.987979	0.000212326	Red protein
StLNC0062	PGSC0003DMT400041169	0.987979	0.000212326	Red protein
StLNC0062	PGSC0003DMT400041206	0.98464	0.000347547	Conserved gene of unknown function
StLNC0062	PGSC0003DMT400041206	0.98464	0.000347547	Conserved gene of unknown function
StLNC0062	PGSC0003DMT400041612	0.989634	0.000157555	Suppressor
StLNC0062	PGSC0003DMT400041612	0.989634	0.000157555	Suppressor
StLNC0062	PGSC0003DMT400041713	0.989141	0.000173039	Leucine zipper-ef-hand containing transmembrane protein
StLNC0062	PGSC0003DMT400041713	0.989141	0.000173039	Leucine zipper-ef-hand containing transmembrane protein
StLNC0062	PGSC0003DMT400042203	0.994693	4.06e-05	F-box protein
StLNC0062	PGSC0003DMT400042203	0.994693	4.06e-05	F-box protein
StLNC0062	PGSC0003DMT400042650	0.99155	0.000104308	Kelch repeat-containing F-box family protein
StLNC0062	PGSC0003DMT400042650	0.99155	0.000104308	Kelch repeat-containing F-box family protein
StLNC0062	PGSC0003DMT400042663	0.982252	0.000464479	Gene of unknown function
StLNC0062	PGSC0003DMT400042663	0.982252	0.000464479	Gene of unknown function
StLNC0062	PGSC0003DMT400042668	0.990085	0.000144053	Conserved gene of unknown function
StLNC0062	PGSC0003DMT400042668	0.990085	0.000144053	Conserved gene of unknown function
StLNC0062	PGSC0003DMT400043056	0.986921	0.000251625	Eukaryotic translation initiation factor
StLNC0062	PGSC0003DMT400043056	0.986921	0.000251625	Eukaryotic translation initiation factor
StLNC0062	PGSC0003DMT400043689	0.994118	5.01e-05	EMB1745
StLNC0062	PGSC0003DMT400043689	0.994118	5.01e-05	EMB1745
StLNC0062	PGSC0003DMT400044280	0.984659	0.000346711	Pre-mRNA-splicing factor
StLNC0062	PGSC0003DMT400044280	0.984659	0.000346711	Pre-mRNA-splicing factor
StLNC0062	PGSC0003DMT400045462	0.985165	0.000324129	Conserved gene of unknown function
StLNC0062	PGSC0003DMT400045462	0.985165	0.000324129	Conserved gene of unknown function
StLNC0062	PGSC0003DMT400045629	0.986048	0.000286497	RNA binding protein RZ-1
StLNC0062	PGSC0003DMT400045629	0.986048	0.000286497	RNA binding protein RZ-1
StLNC0062	PGSC0003DMT400045722	0.99254	8.11e-05	FtsH protease
StLNC0062	PGSC0003DMT400045722	0.99254	8.11e-05	FtsH protease
StLNC0062	PGSC0003DMT400046066	0.993361	6.4e-05	Conserved gene of unknown function
StLNC0062	PGSC0003DMT400046066	0.993361	6.4e-05	Conserved gene of unknown function
StLNC0062	PGSC0003DMT400046729	0.990644	0.000128138	Enzyme inhibitor
StLNC0062	PGSC0003DMT400046729	0.990644	0.000128138	Enzyme inhibitor
StLNC0062	PGSC0003DMT400047238	0.994662	4.11e-05	Conserved gene of unknown function
StLNC0062	PGSC0003DMT400047238	0.994662	4.11e-05	Conserved gene of unknown function
StLNC0062	PGSC0003DMT400047273	0.982943	0.000428902	Conserved gene of unknown function
StLNC0062	PGSC0003DMT400047273	0.982943	0.000428902	Conserved gene of unknown function
StLNC0062	PGSC0003DMT400047537	0.991947	9.47e-05	ABA 8'-hydroxylase CYP707A1
StLNC0062	PGSC0003DMT400047537	0.991947	9.47e-05	ABA 8'-hydroxylase CYP707A1
StLNC0062	PGSC0003DMT400047969	0.989699	0.000155568	S-adenosyl-methionine-sterol-C-methyltransferase
StLNC0062	PGSC0003DMT400047969	0.989699	0.000155568	S-adenosyl-methionine-sterol-C-methyltransferase
StLNC0062	PGSC0003DMT400048186	0.980054	0.000586959	Ribosomal protein L7/L12 C-terminal domain containing protein
StLNC0062	PGSC0003DMT400048186	0.980054	0.000586959	Ribosomal protein L7/L12 C-terminal domain containing protein
StLNC0062	PGSC0003DMT400048813	0.982784	0.000436952	Ribosome biogenesis regulatory protein
StLNC0062	PGSC0003DMT400048813	0.982784	0.000436952	Ribosome biogenesis regulatory protein
StLNC0062	PGSC0003DMT400049575	0.988066	0.000209253	Translational initiation factor eIF1
StLNC0062	PGSC0003DMT400049575	0.988066	0.000209253	Translational initiation factor eIF1
StLNC0062	PGSC0003DMT400049840	0.990463	0.000133176	Potassium channel regulatory factor
StLNC0062	PGSC0003DMT400049840	0.990463	0.000133176	Potassium channel regulatory factor
StLNC0062	PGSC0003DMT400049928	0.982143	0.000470217	24 kDa seed maturation protein
StLNC0062	PGSC0003DMT400049928	0.982143	0.000470217	24 kDa seed maturation protein
StLNC0062	PGSC0003DMT400052064	0.984537	0.000352254	Sulfite oxidase
StLNC0062	PGSC0003DMT400052064	0.984537	0.000352254	Sulfite oxidase
StLNC0062	PGSC0003DMT400052958	0.994894	3.75e-05	CBL-interacting protein kinase 11
StLNC0062	PGSC0003DMT400052958	0.994894	3.75e-05	CBL-interacting protein kinase 11
StLNC0062	PGSC0003DMT400053070	0.981778	0.000489695	Rpi-vnt1
StLNC0062	PGSC0003DMT400053070	0.981778	0.000489695	Rpi-vnt1
StLNC0062	PGSC0003DMT400053223	0.986424	0.000271196	Conserved gene of unknown function
StLNC0062	PGSC0003DMT400053223	0.986424	0.000271196	Conserved gene of unknown function
StLNC0062	PGSC0003DMT400053433	0.989866	0.000150521	DIV2B protein
StLNC0062	PGSC0003DMT400053433	0.989866	0.000150521	DIV2B protein
StLNC0062	PGSC0003DMT400053577	0.991871	9.65e-05	Conserved gene of unknown function
StLNC0062	PGSC0003DMT400053577	0.991871	9.65e-05	Conserved gene of unknown function
StLNC0062	PGSC0003DMT400054127	0.983735	0.000389886	Conserved gene of unknown function
StLNC0062	PGSC0003DMT400054127	0.983735	0.000389886	Conserved gene of unknown function
StLNC0062	PGSC0003DMT400054443	0.989507	0.000161476	AAA ATPase
StLNC0062	PGSC0003DMT400054443	0.989507	0.000161476	AAA ATPase
StLNC0062	PGSC0003DMT400054947	0.982415	0.000455946	U-box protein
StLNC0062	PGSC0003DMT400054947	0.982415	0.000455946	U-box protein
StLNC0062	PGSC0003DMT400055045	0.995244	3.25e-05	U-box protein
StLNC0062	PGSC0003DMT400055045	0.995244	3.25e-05	U-box protein
StLNC0062	PGSC0003DMT400055413	0.980216	0.000577457	Gene of unknown function
StLNC0062	PGSC0003DMT400055413	0.980216	0.000577457	Gene of unknown function
StLNC0062	PGSC0003DMT400055486	0.993548	6.04e-05	Gene of unknown function
StLNC0062	PGSC0003DMT400055486	0.993548	6.04e-05	Gene of unknown function
StLNC0062	PGSC0003DMT400055699	0.991805	9.8e-05	TGF-beta-inducible nuclear protein
StLNC0062	PGSC0003DMT400055699	0.991805	9.8e-05	TGF-beta-inducible nuclear protein
StLNC0062	PGSC0003DMT400055766	0.995349	3.1e-05	Conserved gene of unknown function
StLNC0062	PGSC0003DMT400055766	0.995349	3.1e-05	Conserved gene of unknown function
StLNC0062	PGSC0003DMT400055930	0.990207	0.000140503	Furin
StLNC0062	PGSC0003DMT400055930	0.990207	0.000140503	Furin
StLNC0062	PGSC0003DMT400055958	0.984778	0.000341301	Class II small heat shock protein Le-HSP17.6
StLNC0062	PGSC0003DMT400055958	0.984778	0.000341301	Class II small heat shock protein Le-HSP17.6
StLNC0062	PGSC0003DMT400057654	0.987425	0.000232496	TSJT1
StLNC0062	PGSC0003DMT400057654	0.987425	0.000232496	TSJT1
StLNC0062	PGSC0003DMT400058309	0.988319	0.000200428	Reductase 2
StLNC0062	PGSC0003DMT400058309	0.988319	0.000200428	Reductase 2
StLNC0062	PGSC0003DMT400058933	0.994368	4.58e-05	Lipoxygenase
StLNC0062	PGSC0003DMT400058933	0.994368	4.58e-05	Lipoxygenase
StLNC0062	PGSC0003DMT400059705	0.984806	0.000340039	Phospholipase C
StLNC0062	PGSC0003DMT400059705	0.984806	0.000340039	Phospholipase C
StLNC0062	PGSC0003DMT400059980	0.99032	0.000137231	MT-A70 family protein
StLNC0062	PGSC0003DMT400059980	0.99032	0.000137231	MT-A70 family protein
StLNC0062	PGSC0003DMT400060276	0.993714	5.73e-05	NAC domain protein
StLNC0062	PGSC0003DMT400060276	0.993714	5.73e-05	NAC domain protein
StLNC0062	PGSC0003DMT400060724	0.980294	0.000572906	Universal stress protein family protein
StLNC0062	PGSC0003DMT400060724	0.980294	0.000572906	Universal stress protein family protein
StLNC0062	PGSC0003DMT400061021	0.986336	0.000274749	Ribosomal protein L10
StLNC0062	PGSC0003DMT400061021	0.986336	0.000274749	Ribosomal protein L10
StLNC0062	PGSC0003DMT400061025	0.989264	0.000169101	Gene of unknown function
StLNC0062	PGSC0003DMT400061025	0.989264	0.000169101	Gene of unknown function
StLNC0062	PGSC0003DMT400061432	0.987857	0.000216698	Conserved gene of unknown function
StLNC0062	PGSC0003DMT400061432	0.987857	0.000216698	Conserved gene of unknown function
StLNC0062	PGSC0003DMT400061433	0.995629	2.73e-05	U3 small nucleolar RNA-associated protein
StLNC0062	PGSC0003DMT400061433	0.995629	2.73e-05	U3 small nucleolar RNA-associated protein
StLNC0062	PGSC0003DMT400062813	0.983052	0.000423418	26S proteasome subunit
StLNC0062	PGSC0003DMT400062813	0.983052	0.000423418	26S proteasome subunit
StLNC0062	PGSC0003DMT400063132	0.980982	0.000533524	Eukaryotic translation initiation factor 5A-5
StLNC0062	PGSC0003DMT400063132	0.980982	0.000533524	Eukaryotic translation initiation factor 5A-5
StLNC0062	PGSC0003DMT400063172	0.983977	0.000378317	MYB transcription factor
StLNC0062	PGSC0003DMT400063172	0.983977	0.000378317	MYB transcription factor
StLNC0062	PGSC0003DMT400063187	0.99	0.000146554	Type-A response regulator
StLNC0062	PGSC0003DMT400063187	0.99	0.000146554	Type-A response regulator
StLNC0062	PGSC0003DMT400063335	0.988747	0.000185916	Conserved gene of unknown function
StLNC0062	PGSC0003DMT400063335	0.988747	0.000185916	Conserved gene of unknown function
StLNC0062	PGSC0003DMT400063352	0.985454	0.000311569	101 kDa heat shock protein
StLNC0062	PGSC0003DMT400063352	0.985454	0.000311569	101 kDa heat shock protein
StLNC0062	PGSC0003DMT400063543	0.991836	9.73e-05	Luminal binding protein
StLNC0062	PGSC0003DMT400063543	0.991836	9.73e-05	Luminal binding protein
StLNC0062	PGSC0003DMT400063604	0.982998	0.000426168	PRP38
StLNC0062	PGSC0003DMT400063604	0.982998	0.000426168	PRP38
StLNC0062	PGSC0003DMT400063839	0.990591	0.000129583	Pentatricopeptide repeat protein PPR868-14
StLNC0062	PGSC0003DMT400063839	0.990591	0.000129583	Pentatricopeptide repeat protein PPR868-14
StLNC0062	PGSC0003DMT400063944	0.982897	0.000431225	GRAS6
StLNC0062	PGSC0003DMT400063944	0.982897	0.000431225	GRAS6
StLNC0062	PGSC0003DMT400063955	0.983163	0.000417889	F-box protein SKP2A
StLNC0062	PGSC0003DMT400063955	0.983163	0.000417889	F-box protein SKP2A
StLNC0062	PGSC0003DMT400064080	0.991329	0.000109878	Ubiquitin family protein
StLNC0062	PGSC0003DMT400064080	0.991329	0.000109878	Ubiquitin family protein
StLNC0062	PGSC0003DMT400064284	0.980877	0.000539444	Conserved gene of unknown function
StLNC0062	PGSC0003DMT400064284	0.980877	0.000539444	Conserved gene of unknown function
StLNC0062	PGSC0003DMT400064404	0.987168	0.000242137	Avr9/Cf-9 rapidly elicited protein 20
StLNC0062	PGSC0003DMT400064404	0.987168	0.000242137	Avr9/Cf-9 rapidly elicited protein 20
StLNC0062	PGSC0003DMT400065063	0.99039	0.000135231	L-idonate 5-dehydrogenase
StLNC0062	PGSC0003DMT400065063	0.99039	0.000135231	L-idonate 5-dehydrogenase
StLNC0062	PGSC0003DMT400065840	0.985711	0.000300595	Protein COBRA
StLNC0062	PGSC0003DMT400065840	0.985711	0.000300595	Protein COBRA
StLNC0062	PGSC0003DMT400065926	0.988868	0.000181891	TAF7 (TBP-ASSOCIATED FACTOR 7)
StLNC0062	PGSC0003DMT400065926	0.988868	0.000181891	TAF7 (TBP-ASSOCIATED FACTOR 7)
StLNC0062	PGSC0003DMT400066347	0.994066	5.1e-05	Serine-threonine protein kinase, plant-type
StLNC0062	PGSC0003DMT400066347	0.994066	5.1e-05	Serine-threonine protein kinase, plant-type
StLNC0062	PGSC0003DMT400066532	0.994604	4.2e-05	Seed maturation protein PM23
StLNC0062	PGSC0003DMT400066532	0.994604	4.2e-05	Seed maturation protein PM23
StLNC0062	PGSC0003DMT400066536	0.983121	0.000419969	C2H2L domain class transcription factor
StLNC0062	PGSC0003DMT400066536	0.983121	0.000419969	C2H2L domain class transcription factor
StLNC0062	PGSC0003DMT400066559	0.984812	0.000339784	C2 domain-containing protein
StLNC0062	PGSC0003DMT400066559	0.984812	0.000339784	C2 domain-containing protein
StLNC0062	PGSC0003DMT400066765	0.991314	0.000110285	Glycine-rich protein
StLNC0062	PGSC0003DMT400066765	0.991314	0.000110285	Glycine-rich protein
StLNC0062	PGSC0003DMT400067485	0.990492	0.000132367	HOS1
StLNC0062	PGSC0003DMT400067485	0.990492	0.000132367	HOS1
StLNC0062	PGSC0003DMT400067526	0.994956	3.66e-05	Phospholipase A1
StLNC0062	PGSC0003DMT400067526	0.994956	3.66e-05	Phospholipase A1
StLNC0062	PGSC0003DMT400068108	0.982022	0.000476613	Glutamine-rich protein
StLNC0062	PGSC0003DMT400068108	0.982022	0.000476613	Glutamine-rich protein
StLNC0062	PGSC0003DMT400068378	0.996315	1.93e-05	Conserved gene of unknown function
StLNC0062	PGSC0003DMT400068378	0.996315	1.93e-05	Conserved gene of unknown function
StLNC0062	PGSC0003DMT400068726	0.995012	3.58e-05	SKP1 3
StLNC0062	PGSC0003DMT400068726	0.995012	3.58e-05	SKP1 3
StLNC0062	PGSC0003DMT400068727	0.990187	0.000141074	SKP1
StLNC0062	PGSC0003DMT400068727	0.990187	0.000141074	SKP1
StLNC0062	PGSC0003DMT400069888	0.98991	0.00014921	Transcription factor
StLNC0062	PGSC0003DMT400069888	0.98991	0.00014921	Transcription factor
StLNC0062	PGSC0003DMT400071229	0.981481	0.000505816	Auxin:hydrogen symporter
StLNC0062	PGSC0003DMT400071229	0.981481	0.000505816	Auxin:hydrogen symporter
StLNC0062	PGSC0003DMT400071266	0.98488	0.000336718	TIR1
StLNC0062	PGSC0003DMT400071266	0.98488	0.000336718	TIR1
StLNC0062	PGSC0003DMT400071759	0.994708	4.04e-05	Gene of unknown function
StLNC0062	PGSC0003DMT400071759	0.994708	4.04e-05	Gene of unknown function
StLNC0062	PGSC0003DMT400071820	0.995166	3.36e-05	ER lumen retaining receptor family
StLNC0062	PGSC0003DMT400071820	0.995166	3.36e-05	ER lumen retaining receptor family
StLNC0062	PGSC0003DMT400072555	0.980739	0.000547247	Mal d 1-associated protein
StLNC0062	PGSC0003DMT400072555	0.980739	0.000547247	Mal d 1-associated protein
StLNC0062	PGSC0003DMT400072563	0.992896	7.34e-05	Galactolipid galactosyltransferase
StLNC0062	PGSC0003DMT400072563	0.992896	7.34e-05	Galactolipid galactosyltransferase
StLNC0062	PGSC0003DMT400072624	0.9803	0.000572515	HECT
StLNC0062	PGSC0003DMT400072624	0.9803	0.000572515	HECT
StLNC0062	PGSC0003DMT400072815	0.992744	7.66e-05	Gene of unknown function
StLNC0062	PGSC0003DMT400072815	0.992744	7.66e-05	Gene of unknown function
StLNC0062	PGSC0003DMT400073144	0.983908	0.000381626	Conserved gene of unknown function
StLNC0062	PGSC0003DMT400073144	0.983908	0.000381626	Conserved gene of unknown function
StLNC0062	PGSC0003DMT400073451	0.981308	0.000515358	Nucleosome-binding protein
StLNC0062	PGSC0003DMT400073451	0.981308	0.000515358	Nucleosome-binding protein
StLNC0062	PGSC0003DMT400074141	0.994678	4.08e-05	Glycine rich protein-interacting protein
StLNC0062	PGSC0003DMT400074141	0.994678	4.08e-05	Glycine rich protein-interacting protein
StLNC0062	PGSC0003DMT400074822	0.985917	0.000291928	Conserved gene of unknown function
StLNC0062	PGSC0003DMT400074822	0.985917	0.000291928	Conserved gene of unknown function
StLNC0062	PGSC0003DMT400075349	0.987523	0.000228875	Cyclin-dependent protein kinase p34cdc2
StLNC0062	PGSC0003DMT400075349	0.987523	0.000228875	Cyclin-dependent protein kinase p34cdc2
StLNC0062	PGSC0003DMT400075520	0.986735	0.000258852	CONSTANS
StLNC0062	PGSC0003DMT400075520	0.986735	0.000258852	CONSTANS
StLNC0062	PGSC0003DMT400075613	0.980342	0.000570096	3-5 exonuclease
StLNC0062	PGSC0003DMT400075613	0.980342	0.000570096	3-5 exonuclease
StLNC0062	PGSC0003DMT400075614	0.998384	3.45e-06	Conserved gene of unknown function
StLNC0062	PGSC0003DMT400075614	0.998384	3.45e-06	Conserved gene of unknown function
StLNC0062	PGSC0003DMT400076038	0.983417	0.000405354	Gene of unknown function
StLNC0062	PGSC0003DMT400076038	0.983417	0.000405354	Gene of unknown function
StLNC0062	PGSC0003DMT400076704	0.983031	0.000424468	Eukaryotic initiation factor 3E subunit
StLNC0062	PGSC0003DMT400076704	0.983031	0.000424468	Eukaryotic initiation factor 3E subunit
StLNC0062	PGSC0003DMT400076840	0.988213	0.000204108	Kinase
StLNC0062	PGSC0003DMT400076840	0.988213	0.000204108	Kinase
StLNC0062	PGSC0003DMT400076858	0.99363	5.89e-05	Cytochrome P450 hydroxylase
StLNC0062	PGSC0003DMT400076858	0.99363	5.89e-05	Cytochrome P450 hydroxylase
StLNC0062	PGSC0003DMT400076932	0.985371	0.000315129	GRAS9
StLNC0062	PGSC0003DMT400076932	0.985371	0.000315129	GRAS9
StLNC0062	PGSC0003DMT400077346	0.982394	0.000457051	Conserved gene of unknown function
StLNC0062	PGSC0003DMT400077346	0.982394	0.000457051	Conserved gene of unknown function
StLNC0062	PGSC0003DMT400078007	0.990121	0.000142982	17.6 kD class I small heat shock protein
StLNC0062	PGSC0003DMT400078007	0.990121	0.000142982	17.6 kD class I small heat shock protein
StLNC0062	PGSC0003DMT400078517	0.994369	4.58e-05	Phosphatidylserine synthase
StLNC0062	PGSC0003DMT400078517	0.994369	4.58e-05	Phosphatidylserine synthase
StLNC0062	PGSC0003DMT400078745	0.996672	1.56e-05	DNA ligase
StLNC0062	PGSC0003DMT400078745	0.996672	1.56e-05	DNA ligase
StLNC0062	PGSC0003DMT400078817	0.991325	0.000110003	Gene of unknown function
StLNC0062	PGSC0003DMT400078817	0.991325	0.000110003	Gene of unknown function
StLNC0062	PGSC0003DMT400079117	0.989316	0.000167456	Membrane protein PB1A10.07c
StLNC0062	PGSC0003DMT400079117	0.989316	0.000167456	Membrane protein PB1A10.07c
StLNC0062	PGSC0003DMT400079159	0.98054	0.000558646	Conserved gene of unknown function
StLNC0062	PGSC0003DMT400079159	0.98054	0.000558646	Conserved gene of unknown function
StLNC0062	PGSC0003DMT400079207	0.994882	3.77e-05	Phi-1 protein
StLNC0062	PGSC0003DMT400079207	0.994882	3.77e-05	Phi-1 protein
StLNC0062	PGSC0003DMT400079208	0.9958	2.52e-05	Phi-1 protein
StLNC0062	PGSC0003DMT400079208	0.9958	2.52e-05	Phi-1 protein
StLNC0062	PGSC0003DMT400079209	0.985588	0.000305798	Phi-1 protein
StLNC0062	PGSC0003DMT400079209	0.985588	0.000305798	Phi-1 protein
StLNC0062	PGSC0003DMT400079856	0.988554	0.000192385	Xyloglucan endotransglycosylase
StLNC0062	PGSC0003DMT400079856	0.988554	0.000192385	Xyloglucan endotransglycosylase
StLNC0062	PGSC0003DMT400079979	0.985191	0.000322993	Conserved gene of unknown function
StLNC0062	PGSC0003DMT400079979	0.985191	0.000322993	Conserved gene of unknown function
StLNC0062	PGSC0003DMT400080158	0.996248	1.9998e-05	Conserved gene of unknown function
StLNC0062	PGSC0003DMT400080158	0.996248	1.9998e-05	Conserved gene of unknown function
StLNC0062	PGSC0003DMT400080800	0.995676	2.67e-05	Leucine-rich repeat family protein
StLNC0062	PGSC0003DMT400080800	0.995676	2.67e-05	Leucine-rich repeat family protein
StLNC0062	PGSC0003DMT400081223	0.982579	0.000447463	Protein SIS1
StLNC0062	PGSC0003DMT400081223	0.982579	0.000447463	Protein SIS1
StLNC0062	PGSC0003DMT400081478	0.984583	0.000350132	Stress-associated protein 3
StLNC0062	PGSC0003DMT400081478	0.984583	0.000350132	Stress-associated protein 3
StLNC0062	PGSC0003DMT400081754	0.990321	0.000137216	RRNA methylase
StLNC0062	PGSC0003DMT400081754	0.990321	0.000137216	RRNA methylase
StLNC0062	PGSC0003DMT400083079	0.989503	0.000161608	EMB514
StLNC0062	PGSC0003DMT400083079	0.989503	0.000161608	EMB514
StLNC0062	PGSC0003DMT400083292	0.985182	0.000323369	Replication factor A protein
StLNC0062	PGSC0003DMT400083292	0.985182	0.000323369	Replication factor A protein
StLNC0062	PGSC0003DMT400084916	0.991139	0.000114818	ATP-dependent RNA helicase
StLNC0062	PGSC0003DMT400084916	0.991139	0.000114818	ATP-dependent RNA helicase
StLNC0062	PGSC0003DMT400086334	0.989919	0.000148947	Calmodulin
StLNC0062	PGSC0003DMT400086334	0.989919	0.000148947	Calmodulin
StLNC0062	PGSC0003DMT400086995	0.980187	0.000579129	Ethylene response factor 5
StLNC0062	PGSC0003DMT400086995	0.980187	0.000579129	Ethylene response factor 5
StLNC0062	PGSC0003DMT400088449	0.989602	0.000158536	Disease resistance protein BS2
StLNC0062	PGSC0003DMT400088449	0.989602	0.000158536	Disease resistance protein BS2
StLNC0062	PGSC0003DMT400093243	0.982649	0.000443858	S-locus lectin protein kinase family protein
StLNC0062	PGSC0003DMT400093243	0.982649	0.000443858	S-locus lectin protein kinase family protein
StLNC0062	PGSC0003DMT400093269	0.98226	0.000464031	Conserved gene of unknown function
StLNC0062	PGSC0003DMT400093269	0.98226	0.000464031	Conserved gene of unknown function
StLNC0062	PGSC0003DMT400094318	0.983124	0.000419857	Avr9/Cf-9 rapidly elicited protein 65
StLNC0062	PGSC0003DMT400094318	0.983124	0.000419857	Avr9/Cf-9 rapidly elicited protein 65
StLNC0748	PGSC0003DMT400000186	0.991571	0.000103769	BRASSINOSTEROID INSENSITIVE 1-associated receptor kinase 1
StLNC0748	PGSC0003DMT400000186	0.991571	0.000103769	BRASSINOSTEROID INSENSITIVE 1-associated receptor kinase 1
StLNC0748	PGSC0003DMT400000387	0.98537	0.000315168	Conserved gene of unknown function
StLNC0748	PGSC0003DMT400000387	0.98537	0.000315168	Conserved gene of unknown function
StLNC0748	PGSC0003DMT400000447	0.991544	0.000104462	Methylenetetrahydrofolate dehydrogenase
StLNC0748	PGSC0003DMT400000447	0.991544	0.000104462	Methylenetetrahydrofolate dehydrogenase
StLNC0748	PGSC0003DMT400001617	0.993862	5.46e-05	DNA-binding protein
StLNC0748	PGSC0003DMT400001617	0.993862	5.46e-05	DNA-binding protein
StLNC0748	PGSC0003DMT400001872	0.987979	0.000212334	Conserved gene of unknown function
StLNC0748	PGSC0003DMT400001872	0.987979	0.000212334	Conserved gene of unknown function
StLNC0748	PGSC0003DMT400003038	0.980922	0.000536867	Conserved gene of unknown function
StLNC0748	PGSC0003DMT400003038	0.980922	0.000536867	Conserved gene of unknown function
StLNC0748	PGSC0003DMT400004269	0.99093	0.000120349	Transcription factor
StLNC0748	PGSC0003DMT400004269	0.99093	0.000120349	Transcription factor
StLNC0748	PGSC0003DMT400004914	0.985885	0.000293274	Conserved gene of unknown function
StLNC0748	PGSC0003DMT400004914	0.985885	0.000293274	Conserved gene of unknown function
StLNC0748	PGSC0003DMT400005798	0.984407	0.000358227	Auxin-regulated protein
StLNC0748	PGSC0003DMT400005798	0.984407	0.000358227	Auxin-regulated protein
StLNC0748	PGSC0003DMT400006581	0.993994	5.22e-05	CENP-C
StLNC0748	PGSC0003DMT400006581	0.993994	5.22e-05	CENP-C
StLNC0748	PGSC0003DMT400006735	0.993374	6.38e-05	DNA binding protein
StLNC0748	PGSC0003DMT400006735	0.993374	6.38e-05	DNA binding protein
StLNC0748	PGSC0003DMT400007059	0.982488	0.000452165	Homeodomain-like
StLNC0748	PGSC0003DMT400007059	0.982488	0.000452165	Homeodomain-like
StLNC0748	PGSC0003DMT400007610	0.984625	0.000348251	Gene of unknown function
StLNC0748	PGSC0003DMT400007610	0.984625	0.000348251	Gene of unknown function
StLNC0748	PGSC0003DMT400012431	0.996922	1.33e-05	Oligouridylate binding protein
StLNC0748	PGSC0003DMT400012431	0.996922	1.33e-05	Oligouridylate binding protein
StLNC0748	PGSC0003DMT400013465	0.981035	0.000530526	Sec10
StLNC0748	PGSC0003DMT400013465	0.981035	0.000530526	Sec10
StLNC0748	PGSC0003DMT400017901	0.980895	0.000538387	Gene of unknown function
StLNC0748	PGSC0003DMT400017901	0.980895	0.000538387	Gene of unknown function
StLNC0748	PGSC0003DMT400018367	0.994383	4.56e-05	Histone H2B
StLNC0748	PGSC0003DMT400018367	0.994383	4.56e-05	Histone H2B
StLNC0748	PGSC0003DMT400022039	0.98705	0.000246653	Cryptochrome 1b
StLNC0748	PGSC0003DMT400022039	0.98705	0.000246653	Cryptochrome 1b
StLNC0748	PGSC0003DMT400030668	0.987054	0.000246502	Gene of unknown function
StLNC0748	PGSC0003DMT400030668	0.987054	0.000246502	Gene of unknown function
StLNC0748	PGSC0003DMT400031731	0.991585	0.000103441	ATP binding protein
StLNC0748	PGSC0003DMT400031731	0.991585	0.000103441	ATP binding protein
StLNC0748	PGSC0003DMT400034486	0.980714	0.000548693	Auxin-induced SAUR
StLNC0748	PGSC0003DMT400034486	0.980714	0.000548693	Auxin-induced SAUR
StLNC0748	PGSC0003DMT400038588	0.982926	0.000429776	Transcription factor IIB
StLNC0748	PGSC0003DMT400038588	0.982926	0.000429776	Transcription factor IIB
StLNC0748	PGSC0003DMT400043101	0.989276	0.000168725	Dead box ATP-dependent RNA helicase
StLNC0748	PGSC0003DMT400043101	0.989276	0.000168725	Dead box ATP-dependent RNA helicase
StLNC0748	PGSC0003DMT400043928	0.99015	0.000142147	DNA binding protein
StLNC0748	PGSC0003DMT400043928	0.99015	0.000142147	DNA binding protein
StLNC0748	PGSC0003DMT400045161	0.986262	0.000277755	Conserved gene of unknown function
StLNC0748	PGSC0003DMT400045161	0.986262	0.000277755	Conserved gene of unknown function
StLNC0748	PGSC0003DMT400045226	0.988827	0.000183272	RNA recognition motif-containing protein
StLNC0748	PGSC0003DMT400045226	0.988827	0.000183272	RNA recognition motif-containing protein
StLNC0748	PGSC0003DMT400045718	0.987801	0.000218729	Gene of unknown function
StLNC0748	PGSC0003DMT400045718	0.987801	0.000218729	Gene of unknown function
StLNC0748	PGSC0003DMT400046614	0.991651	0.00010179	Structure-specific recognition protein
StLNC0748	PGSC0003DMT400046614	0.991651	0.00010179	Structure-specific recognition protein
StLNC0748	PGSC0003DMT400046624	0.987042	0.000246963	Cell division cycle protein 48
StLNC0748	PGSC0003DMT400046624	0.987042	0.000246963	Cell division cycle protein 48
StLNC0748	PGSC0003DMT400047079	0.98847	0.000195249	Helix-loop-helix DNA-binding
StLNC0748	PGSC0003DMT400047079	0.98847	0.000195249	Helix-loop-helix DNA-binding
StLNC0748	PGSC0003DMT400048853	0.987243	0.000239325	Gene of unknown function
StLNC0748	PGSC0003DMT400048853	0.987243	0.000239325	Gene of unknown function
StLNC0748	PGSC0003DMT400050118	0.990234	0.000139716	Gene of unknown function
StLNC0748	PGSC0003DMT400050118	0.990234	0.000139716	Gene of unknown function
StLNC0748	PGSC0003DMT400051809	0.989485	0.000162148	Peptidylprolyl isomerase
StLNC0748	PGSC0003DMT400051809	0.989485	0.000162148	Peptidylprolyl isomerase
StLNC0748	PGSC0003DMT400054948	0.98514	0.000325202	U-box protein
StLNC0748	PGSC0003DMT400054948	0.98514	0.000325202	U-box protein
StLNC0748	PGSC0003DMT400054949	0.985905	0.000292458	U-box protein
StLNC0748	PGSC0003DMT400054949	0.985905	0.000292458	U-box protein
StLNC0748	PGSC0003DMT400056716	0.982378	0.000457882	DNA binding protein
StLNC0748	PGSC0003DMT400056716	0.982378	0.000457882	DNA binding protein
StLNC0748	PGSC0003DMT400057200	0.98373	0.000390132	Conserved gene of unknown function
StLNC0748	PGSC0003DMT400057200	0.98373	0.000390132	Conserved gene of unknown function
StLNC0748	PGSC0003DMT400057987	0.993078	6.97e-05	DNA-damage-repair/toleration protein DRT102
StLNC0748	PGSC0003DMT400057987	0.993078	6.97e-05	DNA-damage-repair/toleration protein DRT102
StLNC0748	PGSC0003DMT400058162	0.987408	0.000233131	Conserved gene of unknown function
StLNC0748	PGSC0003DMT400058162	0.987408	0.000233131	Conserved gene of unknown function
StLNC0748	PGSC0003DMT400058456	0.987577	0.000226857	BTB-POZ and MATH domain protein
StLNC0748	PGSC0003DMT400058456	0.987577	0.000226857	BTB-POZ and MATH domain protein
StLNC0748	PGSC0003DMT400060470	0.985142	0.000325127	Amino acid binding protein
StLNC0748	PGSC0003DMT400060470	0.985142	0.000325127	Amino acid binding protein
StLNC0748	PGSC0003DMT400062061	0.99384	5.5e-05	Hydroxyproline-rich glycoprotein family protein
StLNC0748	PGSC0003DMT400062061	0.99384	5.5e-05	Hydroxyproline-rich glycoprotein family protein
StLNC0748	PGSC0003DMT400062828	0.982327	0.000460535	Conserved gene of unknown function
StLNC0748	PGSC0003DMT400062828	0.982327	0.000460535	Conserved gene of unknown function
StLNC0748	PGSC0003DMT400062877	0.990216	0.000140217	Gonadotropin beta chain
StLNC0748	PGSC0003DMT400062877	0.990216	0.000140217	Gonadotropin beta chain
StLNC0748	PGSC0003DMT400063506	0.982951	0.000428504	PWWP domain-containing protein
StLNC0748	PGSC0003DMT400063506	0.982951	0.000428504	PWWP domain-containing protein
StLNC0748	PGSC0003DMT400063510	0.989382	0.000165383	WD-repeat protein
StLNC0748	PGSC0003DMT400063510	0.989382	0.000165383	WD-repeat protein
StLNC0748	PGSC0003DMT400065674	0.986973	0.000249602	Late blight resistance protein
StLNC0748	PGSC0003DMT400065674	0.986973	0.000249602	Late blight resistance protein
StLNC0748	PGSC0003DMT400067229	0.994515	4.34e-05	Gene of unknown function
StLNC0748	PGSC0003DMT400067229	0.994515	4.34e-05	Gene of unknown function
StLNC0748	PGSC0003DMT400067670	0.987106	0.000244489	Ring finger protein
StLNC0748	PGSC0003DMT400067670	0.987106	0.000244489	Ring finger protein
StLNC0748	PGSC0003DMT400068037	0.983878	0.000383057	DNA binding protein
StLNC0748	PGSC0003DMT400068037	0.983878	0.000383057	DNA binding protein
StLNC0748	PGSC0003DMT400068299	0.983306	0.000410796	Conserved gene of unknown function
StLNC0748	PGSC0003DMT400068299	0.983306	0.000410796	Conserved gene of unknown function
StLNC0748	PGSC0003DMT400069690	0.993447	6.23e-05	EXECUTER1 protein, chloroplast
StLNC0748	PGSC0003DMT400069690	0.993447	6.23e-05	EXECUTER1 protein, chloroplast
StLNC0748	PGSC0003DMT400071187	0.998115	4.78e-06	Uncharacterized CRM domain-containing protein, chloroplastic
StLNC0748	PGSC0003DMT400071187	0.998115	4.78e-06	Uncharacterized CRM domain-containing protein, chloroplastic
StLNC0748	PGSC0003DMT400071252	0.985259	0.000319986	Gene of unknown function
StLNC0748	PGSC0003DMT400071252	0.985259	0.000319986	Gene of unknown function
StLNC0748	PGSC0003DMT400071667	0.980459	0.000563316	Conserved gene of unknown function
StLNC0748	PGSC0003DMT400071667	0.980459	0.000563316	Conserved gene of unknown function
StLNC0748	PGSC0003DMT400072991	0.982538	0.000449574	Conserved gene of unknown function
StLNC0748	PGSC0003DMT400072991	0.982538	0.000449574	Conserved gene of unknown function
StLNC0748	PGSC0003DMT400073919	0.987259	0.000238706	Conserved gene of unknown function
StLNC0748	PGSC0003DMT400073919	0.987259	0.000238706	Conserved gene of unknown function
StLNC0748	PGSC0003DMT400075342	0.989114	0.000173898	F17H15.1/F17H15.1
StLNC0748	PGSC0003DMT400075342	0.989114	0.000173898	F17H15.1/F17H15.1
StLNC0748	PGSC0003DMT400075869	0.990271	0.000138635	PLE
StLNC0748	PGSC0003DMT400075869	0.990271	0.000138635	PLE
StLNC0748	PGSC0003DMT400077801	0.980524	0.000559556	ATP binding protein
StLNC0748	PGSC0003DMT400077801	0.980524	0.000559556	ATP binding protein
StLNC0748	PGSC0003DMT400078164	0.982105	0.000472201	Dof zinc finger protein
StLNC0748	PGSC0003DMT400078164	0.982105	0.000472201	Dof zinc finger protein
StLNC0748	PGSC0003DMT400079762	0.986263	0.00027771	Gene of unknown function
StLNC0748	PGSC0003DMT400079762	0.986263	0.00027771	Gene of unknown function
StLNC0748	PGSC0003DMT400082449	0.992536	8.12e-05	Conserved gene of unknown function
StLNC0748	PGSC0003DMT400082449	0.992536	8.12e-05	Conserved gene of unknown function
StLNC0748	PGSC0003DMT400083080	0.984645	0.000347339	Dof zinc finger protein
StLNC0748	PGSC0003DMT400083080	0.984645	0.000347339	Dof zinc finger protein
StLNC0748	PGSC0003DMT400083739	0.988361	0.000198978	MADS transcriptional factor
StLNC0748	PGSC0003DMT400083739	0.988361	0.000198978	MADS transcriptional factor
StLNC0748	PGSC0003DMT400091020	0.982479	0.000452617	Potassium channel NKT1
StLNC0748	PGSC0003DMT400091020	0.982479	0.000452617	Potassium channel NKT1
StLNC0319	PGSC0003DMT400037599	0.995686	2.66e-05	Conserved gene of unknown function
StLNC0319	PGSC0003DMT400037599	0.995686	2.66e-05	Conserved gene of unknown function
StLNC0319	PGSC0003DMT400078736	0.981134	0.000524965	Anti-silencing protein
StLNC0319	PGSC0003DMT400078736	0.981134	0.000524965	Anti-silencing protein
StLNC1824	PGSC0003DMT400069865	0.980002	0.000590035	AG-motif binding protein-2
StLNC0827	PGSC0003DMT400000295	0.981032	0.000530713	Pentatricopeptide repeat-containing protein, mitochondrial
StLNC0827	PGSC0003DMT400000295	0.981032	0.000530713	Pentatricopeptide repeat-containing protein, mitochondrial
StLNC0827	PGSC0003DMT400000310	0.986075	0.000285395	Ubiquitin family protein
StLNC0827	PGSC0003DMT400000310	0.986075	0.000285395	Ubiquitin family protein
StLNC0827	PGSC0003DMT400000875	0.984357	0.000360524	Salt responsive protein 2
StLNC0827	PGSC0003DMT400000875	0.984357	0.000360524	Salt responsive protein 2
StLNC0827	PGSC0003DMT400000946	0.986843	0.00025464	Arginyl-tRNA synthetase
StLNC0827	PGSC0003DMT400000946	0.986843	0.00025464	Arginyl-tRNA synthetase
StLNC0827	PGSC0003DMT400000985	0.991523	0.000104983	GAMYB-binding protein
StLNC0827	PGSC0003DMT400000985	0.991523	0.000104983	GAMYB-binding protein
StLNC0827	PGSC0003DMT400001077	0.99004	0.000145363	RNA processing factor 1
StLNC0827	PGSC0003DMT400001077	0.99004	0.000145363	RNA processing factor 1
StLNC0827	PGSC0003DMT400001470	0.997093	1.18e-05	Pentatricopeptide repeat-containing protein
StLNC0827	PGSC0003DMT400001470	0.997093	1.18e-05	Pentatricopeptide repeat-containing protein
StLNC0827	PGSC0003DMT400001660	0.985733	0.000299644	Conserved gene of unknown function
StLNC0827	PGSC0003DMT400001660	0.985733	0.000299644	Conserved gene of unknown function
StLNC0827	PGSC0003DMT400001813	0.990096	0.000143717	Metallocarboxypeptidase inhibitor
StLNC0827	PGSC0003DMT400001813	0.990096	0.000143717	Metallocarboxypeptidase inhibitor
StLNC0827	PGSC0003DMT400002341	0.987434	0.000232149	Thylakoid-bound ascorbate peroxidase 6
StLNC0827	PGSC0003DMT400002341	0.987434	0.000232149	Thylakoid-bound ascorbate peroxidase 6
StLNC0827	PGSC0003DMT400002375	0.9946	4.21e-05	AP2/ERF domain-containing transcription factor
StLNC0827	PGSC0003DMT400002375	0.9946	4.21e-05	AP2/ERF domain-containing transcription factor
StLNC0827	PGSC0003DMT400003226	0.987558	0.000227566	ADP-ribosylation factor 1
StLNC0827	PGSC0003DMT400003226	0.987558	0.000227566	ADP-ribosylation factor 1
StLNC0827	PGSC0003DMT400003794	0.997199	1.09e-05	Conserved gene of unknown function
StLNC0827	PGSC0003DMT400003794	0.997199	1.09e-05	Conserved gene of unknown function
StLNC0827	PGSC0003DMT400003893	0.994152	4.95e-05	Conserved gene of unknown function
StLNC0827	PGSC0003DMT400003893	0.994152	4.95e-05	Conserved gene of unknown function
StLNC0827	PGSC0003DMT400003907	0.988536	0.000192991	Conserved gene of unknown function
StLNC0827	PGSC0003DMT400003907	0.988536	0.000192991	Conserved gene of unknown function
StLNC0827	PGSC0003DMT400004063	0.992361	8.51e-05	Conserved gene of unknown function
StLNC0827	PGSC0003DMT400004063	0.992361	8.51e-05	Conserved gene of unknown function
StLNC0827	PGSC0003DMT400004086	0.992894	7.35e-05	Auxin-induced SAUR
StLNC0827	PGSC0003DMT400004086	0.992894	7.35e-05	Auxin-induced SAUR
StLNC0827	PGSC0003DMT400004778	0.991906	9.56e-05	Conserved gene of unknown function
StLNC0827	PGSC0003DMT400004778	0.991906	9.56e-05	Conserved gene of unknown function
StLNC0827	PGSC0003DMT400005064	0.982226	0.000465856	BZIP protein
StLNC0827	PGSC0003DMT400005064	0.982226	0.000465856	BZIP protein
StLNC0827	PGSC0003DMT400005086	0.989188	0.000171527	Avr9/Cf-9 rapidly elicited protein 76
StLNC0827	PGSC0003DMT400005086	0.989188	0.000171527	Avr9/Cf-9 rapidly elicited protein 76
StLNC0827	PGSC0003DMT400005236	0.995982	2.3e-05	Protein PPLZ12
StLNC0827	PGSC0003DMT400005236	0.995982	2.3e-05	Protein PPLZ12
StLNC0827	PGSC0003DMT400005501	0.98364	0.00039445	Conserved gene of unknown function
StLNC0827	PGSC0003DMT400005501	0.98364	0.00039445	Conserved gene of unknown function
StLNC0827	PGSC0003DMT400005512	0.992919	7.29e-05	Zinc finger protein
StLNC0827	PGSC0003DMT400005512	0.992919	7.29e-05	Zinc finger protein
StLNC0827	PGSC0003DMT400005873	0.985558	0.000307096	Gene of unknown function
StLNC0827	PGSC0003DMT400005873	0.985558	0.000307096	Gene of unknown function
StLNC0827	PGSC0003DMT400006126	0.988198	0.000204619	C2H2-type zinc finger protein
StLNC0827	PGSC0003DMT400006126	0.988198	0.000204619	C2H2-type zinc finger protein
StLNC0827	PGSC0003DMT400006421	0.991084	0.000116256	Zinc finger protein
StLNC0827	PGSC0003DMT400006421	0.991084	0.000116256	Zinc finger protein
StLNC0827	PGSC0003DMT400006527	0.994597	4.21e-05	Cytoplasmic dynein light chain
StLNC0827	PGSC0003DMT400006527	0.994597	4.21e-05	Cytoplasmic dynein light chain
StLNC0827	PGSC0003DMT400006974	0.996105	2.16e-05	Iron-sulfur cluster assembly protein
StLNC0827	PGSC0003DMT400006974	0.996105	2.16e-05	Iron-sulfur cluster assembly protein
StLNC0827	PGSC0003DMT400007087	0.98917	0.000172093	Conserved gene of unknown function
StLNC0827	PGSC0003DMT400007087	0.98917	0.000172093	Conserved gene of unknown function
StLNC0827	PGSC0003DMT400007183	0.992455	8.3e-05	Small GTP-binding protein Sar1BNt
StLNC0827	PGSC0003DMT400007183	0.992455	8.3e-05	Small GTP-binding protein Sar1BNt
StLNC0827	PGSC0003DMT400007202	0.988653	0.000189061	Pyroglutamyl-peptidase I
StLNC0827	PGSC0003DMT400007202	0.988653	0.000189061	Pyroglutamyl-peptidase I
StLNC0827	PGSC0003DMT400007434	0.987529	0.000228637	Sn-1 protein
StLNC0827	PGSC0003DMT400007434	0.987529	0.000228637	Sn-1 protein
StLNC0827	PGSC0003DMT400007737	0.993797	5.58e-05	Regulator of gene silencing
StLNC0827	PGSC0003DMT400007737	0.993797	5.58e-05	Regulator of gene silencing
StLNC0827	PGSC0003DMT400007742	0.989602	0.00015853	Cellular nucleic acid binding protein
StLNC0827	PGSC0003DMT400007742	0.989602	0.00015853	Cellular nucleic acid binding protein
StLNC0827	PGSC0003DMT400007759	0.98553	0.000308302	Conserved gene of unknown function
StLNC0827	PGSC0003DMT400007759	0.98553	0.000308302	Conserved gene of unknown function
StLNC0827	PGSC0003DMT400007765	0.980744	0.000546954	GTP-binding family protein
StLNC0827	PGSC0003DMT400007765	0.980744	0.000546954	GTP-binding family protein
StLNC0827	PGSC0003DMT400008044	0.986286	0.000276768	Salt-tolerance protein
StLNC0827	PGSC0003DMT400008044	0.986286	0.000276768	Salt-tolerance protein
StLNC0827	PGSC0003DMT400009064	0.982816	0.000435325	Disease resistance protein RGA2
StLNC0827	PGSC0003DMT400009064	0.982816	0.000435325	Disease resistance protein RGA2
StLNC0827	PGSC0003DMT400010000	0.984765	0.000341882	Acc synthase
StLNC0827	PGSC0003DMT400010000	0.984765	0.000341882	Acc synthase
StLNC0827	PGSC0003DMT400010008	0.988683	0.000188045	Conserved gene of unknown function
StLNC0827	PGSC0003DMT400010008	0.988683	0.000188045	Conserved gene of unknown function
StLNC0827	PGSC0003DMT400010803	0.99292	7.29e-05	Sugar transporter
StLNC0827	PGSC0003DMT400010803	0.99292	7.29e-05	Sugar transporter
StLNC0827	PGSC0003DMT400010881	0.993245	6.63e-05	F-box family protein
StLNC0827	PGSC0003DMT400010881	0.993245	6.63e-05	F-box family protein
StLNC0827	PGSC0003DMT400010908	0.980552	0.000557928	Serine/arginine-rich protein
StLNC0827	PGSC0003DMT400010908	0.980552	0.000557928	Serine/arginine-rich protein
StLNC0827	PGSC0003DMT400011470	0.980769	0.000545574	BRASSINAZOLE-RESISTANT 1 protein
StLNC0827	PGSC0003DMT400011470	0.980769	0.000545574	BRASSINAZOLE-RESISTANT 1 protein
StLNC0827	PGSC0003DMT400011762	0.995656	2.7e-05	Invertase inhibitor
StLNC0827	PGSC0003DMT400011762	0.995656	2.7e-05	Invertase inhibitor
StLNC0827	PGSC0003DMT400012169	0.985585	0.000305927	Pre-mRNA processing ribonucleoprotein, binding region
StLNC0827	PGSC0003DMT400012169	0.985585	0.000305927	Pre-mRNA processing ribonucleoprotein, binding region
StLNC0827	PGSC0003DMT400012547	0.990852	0.000122432	Transcription factor JERF1
StLNC0827	PGSC0003DMT400012547	0.990852	0.000122432	Transcription factor JERF1
StLNC0827	PGSC0003DMT400012849	0.983425	0.000404941	RING-H2 finger protein RHG1a
StLNC0827	PGSC0003DMT400012849	0.983425	0.000404941	RING-H2 finger protein RHG1a
StLNC0827	PGSC0003DMT400012873	0.988242	0.000203076	Crooked neck protein
StLNC0827	PGSC0003DMT400012873	0.988242	0.000203076	Crooked neck protein
StLNC0827	PGSC0003DMT400013036	0.991219	0.000112716	Nuclear acid binding protein
StLNC0827	PGSC0003DMT400013036	0.991219	0.000112716	Nuclear acid binding protein
StLNC0827	PGSC0003DMT400013942	0.991905	9.56e-05	Protein phosphatase 2c
StLNC0827	PGSC0003DMT400013942	0.991905	9.56e-05	Protein phosphatase 2c
StLNC0827	PGSC0003DMT400014493	0.983149	0.000418583	Geranylgeranyl transferase type II beta subunit
StLNC0827	PGSC0003DMT400014493	0.983149	0.000418583	Geranylgeranyl transferase type II beta subunit
StLNC0827	PGSC0003DMT400014917	0.98072	0.000548312	RNA-binding protein nob1
StLNC0827	PGSC0003DMT400014917	0.98072	0.000548312	RNA-binding protein nob1
StLNC0827	PGSC0003DMT400015895	0.988693	0.000187709	Gene of unknown function
StLNC0827	PGSC0003DMT400015895	0.988693	0.000187709	Gene of unknown function
StLNC0827	PGSC0003DMT400015931	0.985171	0.000323842	Gene of unknown function
StLNC0827	PGSC0003DMT400015931	0.985171	0.000323842	Gene of unknown function
StLNC0827	PGSC0003DMT400016318	0.984315	0.000362464	Gene of unknown function
StLNC0827	PGSC0003DMT400016318	0.984315	0.000362464	Gene of unknown function
StLNC0827	PGSC0003DMT400016348	0.984687	0.000345439	Conserved gene of unknown function
StLNC0827	PGSC0003DMT400016348	0.984687	0.000345439	Conserved gene of unknown function
StLNC0827	PGSC0003DMT400016577	0.995002	3.59e-05	SAM domain family protein
StLNC0827	PGSC0003DMT400016577	0.995002	3.59e-05	SAM domain family protein
StLNC0827	PGSC0003DMT400016998	0.995777	2.55e-05	Spotted leaf protein
StLNC0827	PGSC0003DMT400016998	0.995777	2.55e-05	Spotted leaf protein
StLNC0827	PGSC0003DMT400017590	0.982728	0.000439816	F-box family protein
[truncated: 38,193 more rows]

## Sheet: cis
lncRNA	partnerRNA_gene	partnerRNA_transcript	distance	Target description	pearson'r	pvalue
StLNC1102	PGSC0003DMG400004774	PGSC0003DMT400012181	96339	Kinase	0.979814	3.77298e-06
StLNC1863	PGSC0003DMG400004774	PGSC0003DMT400012181	96292	Kinase	0.979666	3.87005e-06
StLNC0664	PGSC0003DMG400036515	PGSC0003DMT400086944	95484	Gene of unknown function	0.978385	4.78685e-06
StLNC0921	PGSC0003DMG400021934	PGSC0003DMT400056456	94788	Conserved gene of unknown function	0.977832	5.22584e-06
StLNC2770	PGSC0003DMG400021934	PGSC0003DMT400056456	93562	Conserved gene of unknown function	0.977392	5.59577e-06
StLNC0098	PGSC0003DMG400021934	PGSC0003DMT400056456	93560	Conserved gene of unknown function	0.97733	5.64946e-06
StLNC0995	PGSC0003DMG400021934	PGSC0003DMT400056456	93560	Conserved gene of unknown function	0.976948	5.98749e-06
StLNC1402	PGSC0003DMG400014999	PGSC0003DMT400038813	92651	Eukaryotic translation initiation factor 4B	0.976459	6.44109e-06
StLNC0166	PGSC0003DMG400014999	PGSC0003DMT400038813	91806	Eukaryotic translation initiation factor 4B	0.975968	6.92057e-06
StLNC2758	PGSC0003DMG400038436	PGSC0003DMT400088865	91611	Gene of unknown function	0.975791	7.09881e-06
StLNC0796	PGSC0003DMG400014999	PGSC0003DMT400038813	91237	Eukaryotic translation initiation factor 4B	0.975698	7.19393e-06
StLNC0427	PGSC0003DMG400021934	PGSC0003DMT400056456	90858	Conserved gene of unknown function	0.975309	7.60272e-06
StLNC1896	PGSC0003DMG400021934	PGSC0003DMT400056456	90343	Conserved gene of unknown function	0.974594	8.39525e-06
StLNC0074	PGSC0003DMG400021934	PGSC0003DMT400056456	89991	Conserved gene of unknown function	0.972548	1.09869e-05
StLNC2045	PGSC0003DMG400021934	PGSC0003DMT400056456	89984	Conserved gene of unknown function	0.970953	1.33681e-05
StLNC2502	PGSC0003DMG400014999	PGSC0003DMT400038813	89799	Eukaryotic translation initiation factor 4B	0.970229	1.45609e-05
StLNC2786	PGSC0003DMG400014999	PGSC0003DMT400038813	89228	Eukaryotic translation initiation factor 4B	0.968067	1.85692e-05
StLNC2145	PGSC0003DMG400021934	PGSC0003DMT400056456	88913	Conserved gene of unknown function	0.967819	1.9076e-05
StLNC1152	PGSC0003DMG400021934	PGSC0003DMT400056456	88896	Conserved gene of unknown function	0.967112	2.05687e-05
StLNC1993	PGSC0003DMG400021934	PGSC0003DMT400056456	88648	Conserved gene of unknown function	0.966866	2.11065e-05
StLNC2348	PGSC0003DMG400014999	PGSC0003DMT400038813	88162	Eukaryotic translation initiation factor 4B	0.966182	2.26566e-05
StLNC1167	PGSC0003DMG400034096	PGSC0003DMT400084490	87999	EZ2	0.965996	2.3091e-05
StLNC2500	PGSC0003DMG400021934	PGSC0003DMT400056456	87813	Conserved gene of unknown function	0.965211	2.49928e-05
StLNC0117	PGSC0003DMG400014999	PGSC0003DMT400038813	87668	Eukaryotic translation initiation factor 4B	0.963447	2.96639e-05
StLNC1853	PGSC0003DMG400014999	PGSC0003DMT400038813	87423	Eukaryotic translation initiation factor 4B	0.962128	3.35396e-05
StLNC2522	PGSC0003DMG400021934	PGSC0003DMT400056456	87183	Conserved gene of unknown function	0.960455	3.89537e-05
StLNC1291	PGSC0003DMG400014999	PGSC0003DMT400038813	86981	Eukaryotic translation initiation factor 4B	0.96032	3.94167e-05
StLNC2326	PGSC0003DMG400021934	PGSC0003DMT400056456	86793	Conserved gene of unknown function	0.959261	4.31749e-05
StLNC0411	PGSC0003DMG400014999	PGSC0003DMT400038813	86610	Eukaryotic translation initiation factor 4B	0.958451	4.62193e-05
StLNC2174	PGSC0003DMG400014999	PGSC0003DMT400038813	86610	Eukaryotic translation initiation factor 4B	0.958345	4.66269e-05
StLNC2752	PGSC0003DMG400014999	PGSC0003DMT400038813	86609	Eukaryotic translation initiation factor 4B	0.958195	4.7212e-05
StLNC1037	PGSC0003DMG400017689	PGSC0003DMT400045604	86534	High affinity sulfate transporter type 1	0.957532	4.9851e-05
StLNC1173	PGSC0003DMG402018008	PGSC0003DMT400046401	83686	DNA binding protein	0.957461	5.01426e-05
StLNC1926	PGSC0003DMG400014999	PGSC0003DMT400038813	83620	Eukaryotic translation initiation factor 4B	0.956401	5.45933e-05
StLNC2320	PGSC0003DMG400014999	PGSC0003DMT400038813	83619	Eukaryotic translation initiation factor 4B	0.956258	5.5215e-05
StLNC0505	PGSC0003DMG400017130	PGSC0003DMT400044134	80295	Conserved gene of unknown function	0.956171	5.55956e-05
StLNC1851	PGSC0003DMG400014999	PGSC0003DMT400038813	79529	Eukaryotic translation initiation factor 4B	0.956016	5.62777e-05
StLNC2509	PGSC0003DMG400014999	PGSC0003DMT400038813	79402	Eukaryotic translation initiation factor 4B	0.955266	5.96683e-05
StLNC0340	PGSC0003DMG400034960	PGSC0003DMT400085389	78937	Gene of unknown function	0.955264	5.96765e-05
StLNC0701	PGSC0003DMG400014999	PGSC0003DMT400038813	78103	Eukaryotic translation initiation factor 4B	0.954282	6.43235e-05
StLNC0075	PGSC0003DMG400014999	PGSC0003DMT400038813	76649	Eukaryotic translation initiation factor 4B	0.952613	7.28047e-05
StLNC2537	PGSC0003DMG400014999	PGSC0003DMT400038813	76645	Eukaryotic translation initiation factor 4B	0.951176	8.0713e-05
StLNC2327	PGSC0003DMG400017689	PGSC0003DMT400045604	76022	High affinity sulfate transporter type 1	0.950794	8.29147e-05
StLNC0225	PGSC0003DMG400014999	PGSC0003DMT400038813	75597	Eukaryotic translation initiation factor 4B	0.950233	8.62238e-05
StLNC0892	PGSC0003DMG400017689	PGSC0003DMT400045604	75476	High affinity sulfate transporter type 1	0.950642	8.38026e-05
StLNC1042	PGSC0003DMG400034819	PGSC0003DMT400085248	75198	Gene of unknown function	0.97726	5.71032e-06
StLNC0824	PGSC0003DMG400045703	PGSC0003DMT400096132	75190	DNA binding	0.969015	1.67267e-05
StLNC2408	PGSC0003DMG400034819	PGSC0003DMT400085248	75186	Gene of unknown function	0.966727	2.1416e-05
StLNC0434	PGSC0003DMG400045703	PGSC0003DMT400096132	75184	DNA binding	0.966527	2.18651e-05
StLNC0045	PGSC0003DMG400045703	PGSC0003DMT400096132	75151	DNA binding	0.965109	2.52482e-05
StLNC0444	PGSC0003DMG400045703	PGSC0003DMT400096132	75097	DNA binding	0.964974	2.55879e-05
StLNC2637	PGSC0003DMG400045703	PGSC0003DMT400096132	75093	DNA binding	0.956371	5.47261e-05
StLNC0965	PGSC0003DMG400034819	PGSC0003DMT400085248	75009	Gene of unknown function	0.95218	7.5127e-05
StLNC2832	PGSC0003DMG400034819	PGSC0003DMT400085248	75009	Gene of unknown function	0.951713	7.76926e-05
StLNC2290	PGSC0003DMG400034819	PGSC0003DMT400085248	75009	Gene of unknown function	0.951027	8.1569e-05
StLNC1099	PGSC0003DMG400017689	PGSC0003DMT400045604	74666	High affinity sulfate transporter type 1	0.950961	8.19482e-05
StLNC1681	PGSC0003DMG400012020	PGSC0003DMT400031363	74476	Pectin methlyesterase inhibitor protein 1	0.972865	1.05527e-05
StLNC1027	PGSC0003DMG400017689	PGSC0003DMT400045604	73963	High affinity sulfate transporter type 1	0.979791	3.78786e-06
StLNC1351	PGSC0003DMG400014999	PGSC0003DMT400038813	73268	Eukaryotic translation initiation factor 4B	0.97067	1.3825e-05
StLNC1302	PGSC0003DMG400036515	PGSC0003DMT400086944	72585	Gene of unknown function	0.967366	2.00222e-05
StLNC1458	PGSC0003DMG400036590	PGSC0003DMT400087019	71998	Gene of unknown function	0.965774	2.36176e-05
StLNC1833	PGSC0003DMG400047121	PGSC0003DMT400097550	71631	Cytochrome P450	0.96196	3.40558e-05
StLNC0617	PGSC0003DMG400004829	PGSC0003DMT400012323	71401	Conserved gene of unknown function	0.961533	3.53975e-05
StLNC2775	PGSC0003DMG400014999	PGSC0003DMT400038813	71371	Eukaryotic translation initiation factor 4B	0.955085	6.05028e-05
StLNC0205	PGSC0003DMG400037639	PGSC0003DMT400088068	70034	Gene of unknown function	0.954087	6.52755e-05
StLNC1687	PGSC0003DMG400037639	PGSC0003DMT400088068	69934	Gene of unknown function	0.953795	6.67213e-05
StLNC1159	PGSC0003DMG400037639	PGSC0003DMT400088068	69934	Gene of unknown function	0.953726	6.7068e-05
StLNC2256	PGSC0003DMG400014999	PGSC0003DMT400038813	67282	Eukaryotic translation initiation factor 4B	0.951553	7.85834e-05
StLNC0553	PGSC0003DMG400026268	PGSC0003DMT400067565	66188	Conserved gene of unknown function	0.970332	1.43862e-05
StLNC1700	PGSC0003DMG400047121	PGSC0003DMT400097550	65029	Cytochrome P450	0.963704	2.89489e-05
StLNC1498	PGSC0003DMG400013989	PGSC0003DMT400036354	63212	CBL-interacting protein kinase 07	0.959688	4.16321e-05
StLNC1576	PGSC0003DMG400013989	PGSC0003DMT400036354	63151	CBL-interacting protein kinase 07	0.957986	4.80338e-05
StLNC1980	PGSC0003DMG400042470	PGSC0003DMT400092899	60385	Sensory transduction histidine kinase bacterial	0.954732	6.21628e-05
StLNC1095	PGSC0003DMG400036515	PGSC0003DMT400086944	58554	Gene of unknown function	0.95369	6.72468e-05
StLNC1523	PGSC0003DMG400016074	PGSC0003DMT400041473	57628	Conserved gene of unknown function	0.968021	1.8664e-05
StLNC1296	PGSC0003DMG400039108	PGSC0003DMT400089537	56433	Gene of unknown function	0.964716	2.62452e-05
StLNC0042	PGSC0003DMG400016074	PGSC0003DMT400041473	55959	Conserved gene of unknown function	0.950144	8.67591e-05
StLNC0370	PGSC0003DMG400004829	PGSC0003DMT400012323	55476	Conserved gene of unknown function	0.963478	2.9577e-05
StLNC2793	PGSC0003DMG400009847	PGSC0003DMT400025501	55297	Gene of unknown function	0.951916	7.65728e-05
StLNC0163	PGSC0003DMG400022861	PGSC0003DMT400058836	55256	Vacuolar protein sorting-associated protein	0.950444	8.49714e-05
StLNC2304	PGSC0003DMG400043845	PGSC0003DMT400094274	55230	Integrase core domain containing protein	0.955468	5.87392e-05
StLNC2372	PGSC0003DMG400044216	PGSC0003DMT400094645	54902	Gene of unknown function	0.952845	7.15829e-05
StLNC2788	PGSC0003DMG400018994	PGSC0003DMT400048879	54485	Serine/threonine-protein kinase bri1	0.950425	8.50805e-05
StLNC1877	PGSC0003DMG400043806	PGSC0003DMT400094235	54388	Integrase core domain containing protein	0.973657	9.52078e-06
StLNC2831	PGSC0003DMG400043806	PGSC0003DMT400094235	54371	Integrase core domain containing protein	0.970628	1.38935e-05
StLNC0685	PGSC0003DMG400043806	PGSC0003DMT400094235	54370	Integrase core domain containing protein	0.959207	4.33729e-05
StLNC1061	PGSC0003DMG400043806	PGSC0003DMT400094235	54367	Integrase core domain containing protein	0.95437	6.38986e-05
StLNC1478	PGSC0003DMG400043806	PGSC0003DMT400094235	54358	Integrase core domain containing protein	0.951161	8.08031e-05
StLNC1071	PGSC0003DMG400043806	PGSC0003DMT400094235	54340	Integrase core domain containing protein	0.950969	8.19053e-05
StLNC1715	PGSC0003DMG400016074	PGSC0003DMT400041473	54220	Conserved gene of unknown function	0.977103	5.84865e-06
StLNC2487	PGSC0003DMG400043806	PGSC0003DMT400094235	54118	Integrase core domain containing protein	0.971468	1.25627e-05
StLNC1066	PGSC0003DMG400043806	PGSC0003DMT400094235	54118	Integrase core domain containing protein	0.96515	2.51448e-05
StLNC2135	PGSC0003DMG400043806	PGSC0003DMT400094235	54118	Integrase core domain containing protein	0.96236	3.28315e-05
StLNC0730	PGSC0003DMG400018994	PGSC0003DMT400048879	53988	Serine/threonine-protein kinase bri1	0.962171	3.34063e-05
StLNC1519	PGSC0003DMG400039108	PGSC0003DMT400089537	53398	Gene of unknown function	0.961404	3.58114e-05
StLNC2774	PGSC0003DMG400040193	PGSC0003DMT400090622	53113	Conserved gene of unknown function	0.952692	7.23854e-05
StLNC0946	PGSC0003DMG400024039	PGSC0003DMT400061778	53108	30S ribosomal protein S4, chloroplastic	0.979562	3.9395e-06
StLNC2341	PGSC0003DMG400035656	PGSC0003DMT400086085	52676	'chromo' domain containing protein	0.979433	4.02674e-06
StLNC0595	PGSC0003DMG400035656	PGSC0003DMT400086085	52663	'chromo' domain containing protein	0.978938	4.37411e-06
StLNC2624	PGSC0003DMG400035656	PGSC0003DMT400086085	52663	'chromo' domain containing protein	0.978936	4.37492e-06
StLNC1503	PGSC0003DMG400035656	PGSC0003DMT400086085	52663	'chromo' domain containing protein	0.978754	4.50852e-06
StLNC0585	PGSC0003DMG400035656	PGSC0003DMT400086085	52663	'chromo' domain containing protein	0.978415	4.7631e-06
StLNC0152	PGSC0003DMG400044440	PGSC0003DMT400094869	52435	Gene of unknown function	0.978041	5.05667e-06
StLNC0109	PGSC0003DMG400026268	PGSC0003DMT400067565	51392	Conserved gene of unknown function	0.977929	5.14674e-06
StLNC0353	PGSC0003DMG400002238	PGSC0003DMT400005722	51182	Gene of unknown function	0.977727	5.31266e-06
StLNC1761	PGSC0003DMG400004247	PGSC0003DMT400010851	51113	SET domain-containing protein	0.977701	5.33437e-06
StLNC0375	PGSC0003DMG400035656	PGSC0003DMT400086085	50249	'chromo' domain containing protein	0.977171	5.7885e-06
StLNC0848	PGSC0003DMG400042892	PGSC0003DMT400093321	49767	Integrase core domain containing protein	0.97652	6.38338e-06
StLNC1201	PGSC0003DMG400028451	PGSC0003DMT400073221	49408	ATP binding protein	0.976267	6.62556e-06
StLNC0188	PGSC0003DMG402020702	PGSC0003DMT400053351	49316	Reverse transcriptase	0.975694	7.19845e-06
StLNC1455	PGSC0003DMG400002090	PGSC0003DMT400005354	49076	Non-race specific disease resistance protein 1 b	0.975382	7.52502e-06
StLNC1384	PGSC0003DMG400035656	PGSC0003DMT400086085	48316	'chromo' domain containing protein	0.973861	9.26764e-06
StLNC0753	PGSC0003DMG400016079	PGSC0003DMT400041482	47694	Hydroxyproline-rich glycoprotein family protein	0.973819	9.31958e-06
StLNC0611	PGSC0003DMG402020702	PGSC0003DMT400053351	47570	Reverse transcriptase	0.973616	9.57282e-06
StLNC2662	PGSC0003DMG400016079	PGSC0003DMT400041482	45672	Hydroxyproline-rich glycoprotein family protein	0.973598	9.59498e-06
StLNC0446	PGSC0003DMG400046665	PGSC0003DMT400097094	45549	Gene of unknown function	0.972881	1.05317e-05
StLNC2229	PGSC0003DMG400032169	PGSC0003DMT400081953	45417	Oxoglutarate malate translocator	0.972579	1.09438e-05
StLNC0338	PGSC0003DMG400032169	PGSC0003DMT400081953	45417	Oxoglutarate malate translocator	0.972153	1.1546e-05
StLNC1805	PGSC0003DMG400035656	PGSC0003DMT400086085	44863	'chromo' domain containing protein	0.971577	1.23974e-05
StLNC0407	PGSC0003DMG400028995	PGSC0003DMT400074579	44306	Kinase family protein	0.971458	1.25783e-05
StLNC2587	PGSC0003DMG400042452	PGSC0003DMT400092881	43793	Acetyltranferase	0.970946	1.33798e-05
StLNC2027	PGSC0003DMG400013989	PGSC0003DMT400036354	43755	CBL-interacting protein kinase 07	0.970124	1.47396e-05
StLNC2442	PGSC0003DMG400035456	PGSC0003DMT400085885	43678	Gene of unknown function	0.969064	1.66358e-05
StLNC0518	PGSC0003DMG400032169	PGSC0003DMT400081953	43585	Oxoglutarate malate translocator	0.968758	1.72136e-05
StLNC2459	PGSC0003DMG400032169	PGSC0003DMT400081953	43585	Oxoglutarate malate translocator	0.967348	2.00605e-05
StLNC2669	PGSC0003DMG400037492	PGSC0003DMT400087921	43516	Gene of unknown function	0.966953	2.09159e-05
StLNC2301	PGSC0003DMG400042743	PGSC0003DMT400093172	42970	Gene of unknown function	0.966445	2.20503e-05
StLNC0147	PGSC0003DMG400044457	PGSC0003DMT400094886	42857	Mads box protein	0.965606	2.40212e-05
StLNC2110	PGSC0003DMG400043013	PGSC0003DMT400093442	42017	Conserved gene of unknown function	0.965584	2.40745e-05
StLNC1466	PGSC0003DMG400043013	PGSC0003DMT400093442	42017	Conserved gene of unknown function	0.965149	2.51464e-05
StLNC2779	PGSC0003DMG400034913	PGSC0003DMT400085342	41934	Gene of unknown function	0.965133	2.51876e-05
StLNC0673	PGSC0003DMG400035510	PGSC0003DMT400085939	41741	Gene of unknown function	0.964875	2.5839e-05
StLNC0130	PGSC0003DMG400045596	PGSC0003DMT400096025	41681	Gag-pol polyprotein	0.964631	2.64652e-05
StLNC1107	PGSC0003DMG400045596	PGSC0003DMT400096025	41679	Gag-pol polyprotein	0.964448	2.69432e-05
StLNC1429	PGSC0003DMG400034873	PGSC0003DMT400085302	41357	Gene of unknown function	0.96302	3.08807e-05
StLNC0770	PGSC0003DMG400035436	PGSC0003DMT400085865	41076	Gene of unknown function	0.962752	3.16638e-05
StLNC2714	PGSC0003DMG400032127	PGSC0003DMT400081823	40941	Conserved gene of unknown function	0.962461	3.25274e-05
StLNC1744	PGSC0003DMG400035656	PGSC0003DMT400086085	40800	'chromo' domain containing protein	0.962097	3.36333e-05
StLNC1560	PGSC0003DMG400006794	PGSC0003DMT400017493	40441	PHD finger family protein	0.961607	3.51643e-05
StLNC2052	PGSC0003DMG400012502	PGSC0003DMT400032549	40250	Non-LTR retroelement reverse transcriptase	0.960937	3.7335e-05
StLNC2078	PGSC0003DMG400046036	PGSC0003DMT400096465	40204	Gene of unknown function	0.959816	4.1176e-05
StLNC0070	PGSC0003DMG400039878	PGSC0003DMT400090307	40179	Integrase core domain containing protein	0.959711	4.15477e-05
StLNC2093	PGSC0003DMG400004996	PGSC0003DMT400012829	39855	UDP-glucose 4-epimerase	0.959431	4.25549e-05
StLNC2429	PGSC0003DMG400013088	PGSC0003DMT400034053	39219	Neutral invertase	0.959416	4.26107e-05
StLNC1023	PGSC0003DMG400008716	PGSC0003DMT400022486	39107	Conserved gene of unknown function	0.959288	4.30786e-05
StLNC0136	PGSC0003DMG400034913	PGSC0003DMT400085342	39002	Gene of unknown function	0.95792	4.82934e-05
StLNC1243	PGSC0003DMG400045050	PGSC0003DMT400095479	38994	Conserved gene of unknown function	0.95763	4.94569e-05
StLNC0343	PGSC0003DMG400034913	PGSC0003DMT400085342	38943	Gene of unknown function	0.957029	5.19233e-05
StLNC1915	PGSC0003DMG400040052	PGSC0003DMT400090481	38907	Gene of unknown function	0.956637	5.35803e-05
StLNC2225	PGSC0003DMG400040052	PGSC0003DMT400090481	38884	Gene of unknown function	0.955115	6.03636e-05
StLNC2164	PGSC0003DMG400013088	PGSC0003DMT400034053	38443	Neutral invertase	0.954952	6.11271e-05
StLNC1583	PGSC0003DMG400021734	PGSC0003DMT400055954	38139	Gene of unknown function	0.951197	8.05951e-05
StLNC1378	PGSC0003DMG400008719	PGSC0003DMT400022502	38028	Peroxisomal targeting signal type 2 receptor	0.967332	2.00958e-05
StLNC1410	PGSC0003DMG400032127	PGSC0003DMT400081823	37744	Conserved gene of unknown function	0.963925	2.83414e-05
StLNC0293	PGSC0003DMG400040941	PGSC0003DMT400091370	37349	Gene of unknown function	0.962161	3.34371e-05
StLNC1121	PGSC0003DMG400012503	PGSC0003DMT400032552	36649	DNA mismatch repair protein mutS	0.952444	7.37042e-05
StLNC2155	PGSC0003DMG400012503	PGSC0003DMT400032552	36624	DNA mismatch repair protein mutS	0.952241	7.47997e-05
StLNC0032	PGSC0003DMG400012779	PGSC0003DMT400033271	36581	Gene of unknown function	0.950134	8.68155e-05
StLNC2455	PGSC0003DMG400012779	PGSC0003DMT400033271	36567	Gene of unknown function	0.950128	8.68535e-05
StLNC2492	PGSC0003DMG400012779	PGSC0003DMT400033271	36558	Gene of unknown function	0.951074	8.12972e-05
StLNC0814	PGSC0003DMG400037492	PGSC0003DMT400087921	36433	Gene of unknown function	0.950232	8.62321e-05
StLNC0410	PGSC0003DMG400017689	PGSC0003DMT400045604	35820	High affinity sulfate transporter type 1	0.979522	3.96626e-06
StLNC0537	PGSC0003DMG400028451	PGSC0003DMT400073221	35796	ATP binding protein	0.979326	4.10009e-06
StLNC0596	PGSC0003DMG400006795	PGSC0003DMT400017509	35682	TRNA-dihydrouridine synthase A	0.978895	4.40493e-06
StLNC2515	PGSC0003DMG400045050	PGSC0003DMT400095479	35562	Conserved gene of unknown function	0.978761	4.5031e-06
StLNC1362	PGSC0003DMG400039878	PGSC0003DMT400090307	35450	Integrase core domain containing protein	0.97867	4.57066e-06
StLNC0116	PGSC0003DMG400026860	PGSC0003DMT400069046	35194	Ubiquitin-protein ligase	0.978556	4.65592e-06
StLNC2528	PGSC0003DMG400044793	PGSC0003DMT400095222	35096	Oligouridylate binding protein	0.977949	5.13077e-06
StLNC2250	PGSC0003DMG400046815	PGSC0003DMT400097244	35073	Gene of unknown function	0.977789	5.2616e-06
StLNC0641	PGSC0003DMG400044371	PGSC0003DMT400094800	35009	Gene of unknown function	0.977421	5.57097e-06
StLNC0213	PGSC0003DMG400006795	PGSC0003DMT400017509	34963	TRNA-dihydrouridine synthase A	0.976936	5.99826e-06
StLNC0171	PGSC0003DMG400043285	PGSC0003DMT400093714	34925	Gene of unknown function	0.976532	6.37162e-06
StLNC2200	PGSC0003DMG400030177	PGSC0003DMT400077589	34424	Zinc finger family protein	0.976461	6.43915e-06
StLNC1935	PGSC0003DMG400028451	PGSC0003DMT400073221	34152	ATP binding protein	0.976374	6.52197e-06
StLNC1274	PGSC0003DMG400033131	PGSC0003DMT400083225	33754	Tospovirus resistance protein E	0.97518	7.74146e-06
StLNC1848	PGSC0003DMG400027979	PGSC0003DMT400071914	33746	DNA binding protein	0.975148	7.77643e-06
StLNC1472	PGSC0003DMG400032127	PGSC0003DMT400081823	33653	Conserved gene of unknown function	0.974083	8.99677e-06
StLNC1369	PGSC0003DMG400019052	PGSC0003DMT400049021	33537	Conserved gene of unknown function	0.9736	9.59304e-06
StLNC0051	PGSC0003DMG400035459	PGSC0003DMT400085888	33527	Plastid CUL1	0.973377	9.87714e-06
StLNC2748	PGSC0003DMG400040427	PGSC0003DMT400090856	33500	Gene of unknown function	0.972149	1.15517e-05
StLNC2815	PGSC0003DMG400041702	PGSC0003DMT400092131	33377	Gene of unknown function	0.972033	1.17208e-05
StLNC1750	PGSC0003DMG400017689	PGSC0003DMT400045604	33272	High affinity sulfate transporter type 1	0.971099	1.31361e-05
StLNC2707	PGSC0003DMG400016824	PGSC0003DMT400043330	33156	Conserved gene of unknown function	0.970856	1.35228e-05
StLNC0409	PGSC0003DMG400016824	PGSC0003DMT400043330	33156	Conserved gene of unknown function	0.97073	1.37277e-05
StLNC2783	PGSC0003DMG400041702	PGSC0003DMT400092131	33124	Gene of unknown function	0.970341	1.43712e-05
StLNC0747	PGSC0003DMG400041702	PGSC0003DMT400092131	33124	Gene of unknown function	0.970182	1.46403e-05
StLNC2525	PGSC0003DMG400041702	PGSC0003DMT400092131	33124	Gene of unknown function	0.970034	1.48935e-05
StLNC2673	PGSC0003DMG400035656	PGSC0003DMT400086085	33107	'chromo' domain containing protein	0.968523	1.76666e-05
StLNC0357	PGSC0003DMG400017689	PGSC0003DMT400045604	33060	High affinity sulfate transporter type 1	0.968219	1.82658e-05
StLNC0629	PGSC0003DMG400032127	PGSC0003DMT400081823	32963	Conserved gene of unknown function	0.967435	1.98769e-05
StLNC0545	PGSC0003DMG400040941	PGSC0003DMT400091370	32728	Gene of unknown function	0.96711	2.05735e-05
StLNC0925	PGSC0003DMG400002436	PGSC0003DMT400006250	32604	DNA binding protein	0.967061	2.06783e-05
StLNC2828	PGSC0003DMG400041702	PGSC0003DMT400092131	32496	Gene of unknown function	0.966154	2.27205e-05
StLNC0742	PGSC0003DMG400041702	PGSC0003DMT400092131	32484	Gene of unknown function	0.965913	2.32866e-05
StLNC2065	PGSC0003DMG400004204	PGSC0003DMT400010758	32056	60S ribosomal protein L27	0.965654	2.3906e-05
StLNC0993	PGSC0003DMG400035847	PGSC0003DMT400086276	32003	Gene of unknown function	0.965456	2.43873e-05
StLNC2799	PGSC0003DMG400007702	PGSC0003DMT400019908	31922	Gene of unknown function	0.962965	3.10409e-05
StLNC2403	PGSC0003DMG400022114	PGSC0003DMT400056852	31890	Ent-kaurene synthase B, chloroplast	0.962254	3.31548e-05
StLNC1785	PGSC0003DMG400034410	PGSC0003DMT400084839	31869	GK19787	0.961574	3.527e-05
StLNC1557	PGSC0003DMG400023144	PGSC0003DMT400059566	31768	41 kD chloroplast nucleoid DNA binding protein (CND41)	0.96076	3.79214e-05
StLNC2485	PGSC0003DMG400032127	PGSC0003DMT400081823	31509	Conserved gene of unknown function	0.960306	3.94649e-05
StLNC0087	PGSC0003DMG400001676	PGSC0003DMT400004212	31409	Sterol desaturase	0.960031	4.0416e-05
StLNC0450	PGSC0003DMG400001676	PGSC0003DMT400004212	31408	Sterol desaturase	0.959832	4.11176e-05
StLNC2097	PGSC0003DMG400046036	PGSC0003DMT400096465	31321	Gene of unknown function	0.959515	4.22536e-05
StLNC0101	PGSC0003DMG400037465	PGSC0003DMT400087894	31213	Conserved gene of unknown function	0.957226	5.11067e-05
StLNC2269	PGSC0003DMG400021934	PGSC0003DMT400056456	30833	Conserved gene of unknown function	0.956622	5.36421e-05
StLNC1031	PGSC0003DMG400021934	PGSC0003DMT400056456	30825	Conserved gene of unknown function	0.956394	5.46236e-05
StLNC0950	PGSC0003DMG400021934	PGSC0003DMT400056456	30824	Conserved gene of unknown function	0.953997	6.57223e-05
StLNC2414	PGSC0003DMG400021934	PGSC0003DMT400056456	30823	Conserved gene of unknown function	0.95361	6.76528e-05
StLNC0754	PGSC0003DMG400021934	PGSC0003DMT400056456	30823	Conserved gene of unknown function	0.953462	6.83963e-05
StLNC2557	PGSC0003DMG400021934	PGSC0003DMT400056456	30823	Conserved gene of unknown function	0.952496	7.34263e-05
StLNC1550	PGSC0003DMG400021934	PGSC0003DMT400056456	30823	Conserved gene of unknown function	0.950476	8.47788e-05
StLNC0688	PGSC0003DMG400021934	PGSC0003DMT400056456	30823	Conserved gene of unknown function	0.974637	8.34631e-06
StLNC0077	PGSC0003DMG400021934	PGSC0003DMT400056456	30822	Conserved gene of unknown function	0.972548	1.09877e-05
StLNC1216	PGSC0003DMG400021934	PGSC0003DMT400056456	30822	Conserved gene of unknown function	0.970288	1.44611e-05
StLNC0261	PGSC0003DMG400021934	PGSC0003DMT400056456	30822	Conserved gene of unknown function	0.966182	2.26551e-05
StLNC1613	PGSC0003DMG400045050	PGSC0003DMT400095479	30745	Conserved gene of unknown function	0.960155	3.99861e-05
StLNC2380	PGSC0003DMG400045050	PGSC0003DMT400095479	30730	Conserved gene of unknown function	0.95807	4.77031e-05
StLNC0500	PGSC0003DMG400045050	PGSC0003DMT400095479	30707	Conserved gene of unknown function	0.956369	5.4732e-05
StLNC1546	PGSC0003DMG400040570	PGSC0003DMT400090999	30474	Gene of unknown function	0.95437	6.39004e-05
StLNC0173	PGSC0003DMG400040570	PGSC0003DMT400090999	30394	Gene of unknown function	0.952639	7.26661e-05
StLNC1312	PGSC0003DMG401017193	PGSC0003DMT400044270	30270	Mini zinc finger 1	0.952614	7.27977e-05
StLNC1303	PGSC0003DMG400018616	PGSC0003DMT400047899	30232	Multidrug resistance pump	0.951174	8.07264e-05
StLNC2315	PGSC0003DMG400040052	PGSC0003DMT400090481	29937	Gene of unknown function	0.979841	3.75498e-06
StLNC2386	PGSC0003DMG400021934	PGSC0003DMT400056456	29496	Conserved gene of unknown function	0.979698	3.84844e-06
StLNC0527	PGSC0003DMG400005498	PGSC0003DMT400014020	29407	Multifunctional protein	0.979483	3.9926e-06
StLNC1309	PGSC0003DMG400021934	PGSC0003DMT400056456	29213	Conserved gene of unknown function	0.978993	4.33404e-06
StLNC1625	PGSC0003DMG400021934	PGSC0003DMT400056456	29213	Conserved gene of unknown function	0.977935	5.14182e-06
StLNC2382	PGSC0003DMG400040052	PGSC0003DMT400090481	29191	Gene of unknown function	0.977815	5.24035e-06
StLNC0838	PGSC0003DMG400021734	PGSC0003DMT400055954	29030	Gene of unknown function	0.977012	5.92983e-06
StLNC1171	PGSC0003DMG400019864	PGSC0003DMT400051149	28941	Binding protein	0.976843	6.08302e-06
StLNC2343	PGSC0003DMG400021934	PGSC0003DMT400056456	28846	Conserved gene of unknown function	0.976551	6.35341e-06
StLNC0879	PGSC0003DMG400021934	PGSC0003DMT400056456	28846	Conserved gene of unknown function	0.976175	6.715e-06
StLNC1977	PGSC0003DMG400032169	PGSC0003DMT400081953	28683	Oxoglutarate malate translocator	0.975999	6.88928e-06
StLNC1798	PGSC0003DMG400006794	PGSC0003DMT400017493	28650	PHD finger family protein	0.975881	7.00708e-06
StLNC0506	PGSC0003DMG400006794	PGSC0003DMT400017493	28644	PHD finger family protein	0.974841	8.1156e-06
StLNC1538	PGSC0003DMG400005359	PGSC0003DMT400013704	28585	Sinapyl alcohol dehydrogenase 2	0.973573	9.62668e-06
StLNC1737	PGSC0003DMG400021934	PGSC0003DMT400056456	28450	Conserved gene of unknown function	0.973558	9.64635e-06
StLNC0783	PGSC0003DMG400021934	PGSC0003DMT400056456	28445	Conserved gene of unknown function	0.973555	9.64953e-06
StLNC1072	PGSC0003DMG400021934	PGSC0003DMT400056456	28445	Conserved gene of unknown function	0.973492	9.73011e-06
StLNC2493	PGSC0003DMG400018910	PGSC0003DMT400048676	28130	Gene of unknown function	0.972817	1.06179e-05
StLNC0787	PGSC0003DMG400018910	PGSC0003DMT400048676	28130	Gene of unknown function	0.972264	1.13878e-05
StLNC2597	PGSC0003DMG400032207	PGSC0003DMT400082023	28094	Lipoxygenase	0.972096	1.16289e-05
StLNC1238	PGSC0003DMG400013761	PGSC0003DMT400035762	27912	Clathrin assembly protein	0.971866	1.19642e-05
StLNC0526	PGSC0003DMG400043463	PGSC0003DMT400093892	27788	Gene of unknown function	0.971574	1.24021e-05
StLNC0175	PGSC0003DMG400024415	PGSC0003DMT400062737	27610	Gene of unknown function	0.971426	1.26267e-05
StLNC0498	PGSC0003DMG400015141	PGSC0003DMT400039162	27558	NT16 polypeptide	0.971029	1.32469e-05
StLNC1228	PGSC0003DMG400044440	PGSC0003DMT400094869	27505	Gene of unknown function	0.970692	1.379e-05
StLNC2547	PGSC0003DMG400024392	PGSC0003DMT400062680	27302	Chorismate synthase 1, chloroplastic	0.970633	1.3886e-05
StLNC1357	PGSC0003DMG400039767	PGSC0003DMT400090196	27070	Gene of unknown function	0.97062	1.39069e-05
StLNC0726	PGSC0003DMG400020193	PGSC0003DMT400052026	27039	Sialyltransferase	0.969554	1.57391e-05
StLNC0968	PGSC0003DMG400034868	PGSC0003DMT400085297	26655	Gene of unknown function	0.969276	1.62428e-05
StLNC1515	PGSC0003DMG400034868	PGSC0003DMT400085297	26654	Gene of unknown function	0.967399	1.99521e-05
StLNC2448	PGSC0003DMG400030270	PGSC0003DMT400077817	26647	RNase H family protein	0.967197	2.03855e-05
StLNC0752	PGSC0003DMG400044969	PGSC0003DMT400095398	26500	Conserved gene of unknown function	0.966243	2.25139e-05
StLNC1992	PGSC0003DMG400030270	PGSC0003DMT400077817	26463	RNase H family protein	0.965596	2.40455e-05
StLNC1149	PGSC0003DMG400005498	PGSC0003DMT400014020	26200	Multifunctional protein	0.965341	2.46687e-05
StLNC2631	PGSC0003DMG400030270	PGSC0003DMT400077817	25987	RNase H family protein	0.96491	2.57491e-05
StLNC1350	PGSC0003DMG400028407	PGSC0003DMT400073031	25752	Receptor kinase RLPK1	0.964305	2.73205e-05
StLNC1716	PGSC0003DMG400013761	PGSC0003DMT400035762	25741	Clathrin assembly protein	0.964236	2.7505e-05
StLNC0234	PGSC0003DMG400005359	PGSC0003DMT400013704	25557	Sinapyl alcohol dehydrogenase 2	0.963048	3.08017e-05
StLNC2000	PGSC0003DMG400034868	PGSC0003DMT400085297	25194	Gene of unknown function	0.961666	3.49786e-05
StLNC0493	PGSC0003DMG400034868	PGSC0003DMT400085297	25189	Gene of unknown function	0.961104	3.67848e-05
StLNC2421	PGSC0003DMG400015094	PGSC0003DMT400039042	25002	Gene of unknown function	0.960789	3.78266e-05
StLNC2426	PGSC0003DMG400034868	PGSC0003DMT400085297	24873	Gene of unknown function	0.960762	3.79171e-05
StLNC0351	PGSC0003DMG400005359	PGSC0003DMT400013704	24784	Sinapyl alcohol dehydrogenase 2	0.95826	4.6957e-05
StLNC2855	PGSC0003DMG400008029	PGSC0003DMT400020747	24758	Sorting and assembly machinery (Sam50) protein	0.957648	4.93832e-05
StLNC0561	PGSC0003DMG400014329	PGSC0003DMT400037162	24718	F-box family protein	0.957495	5.00038e-05
StLNC1270	PGSC0003DMG400012946	PGSC0003DMT400033700	24710	Gene of unknown function	0.956106	5.58845e-05
StLNC0193	PGSC0003DMG400017370	PGSC0003DMT400044753	24659	Gene of unknown function	0.955526	5.8476e-05
StLNC0944	PGSC0003DMG400032784	PGSC0003DMT400082725	24625	Conserved gene of unknown function	0.954909	6.13263e-05
StLNC2140	PGSC0003DMG400005815	PGSC0003DMT400014902	24593	Cytochrome P450	0.95364	6.7498e-05
StLNC0601	PGSC0003DMG400026817	PGSC0003DMT400068945	24553	Type II DNA topoisomerase VI subunit B	0.953578	6.78109e-05
StLNC2281	PGSC0003DMG400006638	PGSC0003DMT400016991	24084	Gene of unknown function	0.953457	6.84255e-05
StLNC2359	PGSC0003DMG400010585	PGSC0003DMT400027444	24072	Sesquiterpene synthase	0.953434	6.85421e-05
StLNC1063	PGSC0003DMG400027873	PGSC0003DMT400071652	24054	Dihydrolipoamide succinyltransferase component of 2-oxoglutarate dehydrogenase	0.952376	7.40732e-05
StLNC0354	PGSC0003DMG400042115	PGSC0003DMT400092544	24042	Gene of unknown function	0.951874	7.68027e-05
StLNC1769	PGSC0003DMG400024857	PGSC0003DMT400063955	24040	F-box protein SKP2A	0.951807	7.71714e-05
StLNC2523	PGSC0003DMG400042115	PGSC0003DMT400092544	24033	Gene of unknown function	0.951436	7.92428e-05
StLNC2660	PGSC0003DMG400009330	PGSC0003DMT400024138	24026	Lyase	0.951033	8.15346e-05
StLNC0164	PGSC0003DMG400039878	PGSC0003DMT400090307	23988	Integrase core domain containing protein	0.950472	8.4801e-05
StLNC2339	PGSC0003DMG400030043	PGSC0003DMT400077237	23965	Sucrose cleavage protein	0.97322	1.00811e-05
StLNC1868	PGSC0003DMG400024857	PGSC0003DMT400063955	23902	F-box protein SKP2A	0.972779	1.06696e-05
StLNC2220	PGSC0003DMG400035185	PGSC0003DMT400085614	23796	3-hydroxy-3-methylglutaryl-coenzyme A reductase 1	0.972662	1.08292e-05
StLNC1530	PGSC0003DMG400035185	PGSC0003DMT400085614	23794	3-hydroxy-3-methylglutaryl-coenzyme A reductase 1	0.97185	1.19882e-05
StLNC2424	PGSC0003DMG400029072	PGSC0003DMT400074763	23793	Alpha-soluble NSF attachment protein	0.965816	2.35179e-05
StLNC2340	PGSC0003DMG400025279	PGSC0003DMT400065060	23526	MADS-box transcription factor FBP22	0.965678	2.3848e-05
StLNC1869	PGSC0003DMG400044938	PGSC0003DMT400095367	23351	Gene of unknown function	0.963344	2.99558e-05
StLNC2467	PGSC0003DMG400014101	PGSC0003DMT400036580	23284	Cell growth-regulating nucleolar protein	0.956566	5.38829e-05
StLNC1183	PGSC0003DMG400018090	PGSC0003DMT400046598	23226	F-box family protein	0.951641	7.8095e-05
StLNC2819	PGSC0003DMG400022981	PGSC0003DMT400059166	23194	SET domain protein	0.978692	4.55413e-06
StLNC1086	PGSC0003DMG400036825	PGSC0003DMT400087254	23172	Gene of unknown function	0.969446	1.59334e-05
StLNC2559	PGSC0003DMG400009943	PGSC0003DMT400025756	23057	Cyclin B	0.964883	2.58192e-05
StLNC2302	PGSC0003DMG400023499	PGSC0003DMT400060416	22855	Proteophosphoglycan ppg4	0.962979	3.10016e-05
StLNC2337	PGSC0003DMG400023311	PGSC0003DMT400059924	22816	Integrase	0.954478	6.33772e-05
StLNC2792	PGSC0003DMG400035494	PGSC0003DMT400085923	22758	Gene of unknown function	0.951738	7.75526e-05
StLNC0464	PGSC0003DMG400035494	PGSC0003DMT400085923	22694	Gene of unknown function	0.974001	9.096e-06
StLNC1508	PGSC0003DMG400037690	PGSC0003DMT400088119	22594	Gene of unknown function	0.970866	1.35075e-05
StLNC2130	PGSC0003DMG400035494	PGSC0003DMT400085923	22581	Gene of unknown function	0.97006	1.48496e-05
StLNC0499	PGSC0003DMG400035494	PGSC0003DMT400085923	22551	Gene of unknown function	0.95958	4.20161e-05
StLNC2076	PGSC0003DMG400044440	PGSC0003DMT400094869	22538	Gene of unknown function	0.953144	7.00287e-05
StLNC2365	PGSC0003DMG400035494	PGSC0003DMT400085923	22432	Gene of unknown function	0.950272	8.59904e-05
StLNC2172	PGSC0003DMG400036091	PGSC0003DMT400086520	22323	O-methyltransferase 3	0.954111	6.51611e-05
StLNC0827	PGSC0003DMG400044220	PGSC0003DMT400094649	22301	Gene of unknown function	0.960687	3.81686e-05
StLNC1746	PGSC0003DMG400031864	PGSC0003DMT400081468	22240	Classical arabinogalactan protein 26	0.963172	3.04454e-05
StLNC1405	PGSC0003DMG400031864	PGSC0003DMT400081468	22240	Classical arabinogalactan protein 26	0.971758	1.21246e-05
StLNC1748	PGSC0003DMG400033871	PGSC0003DMT400084197	22151	Conserved gene of unknown function	0.970953	1.33685e-05
StLNC0868	PGSC0003DMG400027800	PGSC0003DMT400071453	22033	Conserved gene of unknown function	0.966824	2.11994e-05
StLNC1867	PGSC0003DMG400005261	PGSC0003DMT400013488	21923	Cytochrome P450	0.966331	2.23112e-05
StLNC0679	PGSC0003DMG400032169	PGSC0003DMT400081953	21817	Oxoglutarate malate translocator	0.966317	2.23449e-05
StLNC0738	PGSC0003DMG400032169	PGSC0003DMT400081953	21719	Oxoglutarate malate translocator	0.961059	3.69333e-05
StLNC1994	PGSC0003DMG400009264	PGSC0003DMT400023954	21696	40S ribosomal protein S29	0.95924	4.3252e-05
StLNC0278	PGSC0003DMG400027979	PGSC0003DMT400071914	21647	DNA binding protein	0.958932	4.43933e-05
StLNC0863	PGSC0003DMG400040032	PGSC0003DMT400090461	21643	Gene of unknown function	0.958478	4.61148e-05
StLNC0208	PGSC0003DMG400030915	PGSC0003DMT400079419	21600	C2 domain-containing protein	0.956555	5.39308e-05
StLNC1078	PGSC0003DMG400003245	PGSC0003DMT400008406	21596	Gene of unknown function	0.955166	6.01275e-05
StLNC1643	PGSC0003DMG400003245	PGSC0003DMT400008406	21595	Gene of unknown function	0.953365	6.88936e-05
StLNC0417	PGSC0003DMG400003245	PGSC0003DMT400008406	21595	Gene of unknown function	0.952998	7.07854e-05
StLNC1588	PGSC0003DMG400003245	PGSC0003DMT400008406	21595	Gene of unknown function	0.952254	7.47259e-05
StLNC0772	PGSC0003DMG400003290	PGSC0003DMT400008506	21586	Conserved gene of unknown function	0.951327	7.9855e-05
StLNC1257	PGSC0003DMG400003245	PGSC0003DMT400008406	21583	Gene of unknown function	0.951013	8.16471e-05
StLNC2643	PGSC0003DMG400026617	PGSC0003DMT400068450	21412	Methylketone synthase Ib	0.976391	6.50531e-06
StLNC1065	PGSC0003DMG400026617	PGSC0003DMT400068450	21412	Methylketone synthase Ib	0.973913	9.20298e-06
StLNC0216	PGSC0003DMG400044253	PGSC0003DMT400094682	21347	Conserved gene of unknown function	0.972377	1.12273e-05
StLNC0905	PGSC0003DMG400034441	PGSC0003DMT400084870	21291	Conserved gene of unknown function	0.968875	1.69914e-05
StLNC0530	PGSC0003DMG400044422	PGSC0003DMT400094851	21240	Gene of unknown function	0.961467	3.56096e-05
StLNC2231	PGSC0003DMG400008427	PGSC0003DMT400021713	21150	Tetracycline transporter	0.960732	3.80179e-05
StLNC2430	PGSC0003DMG400008427	PGSC0003DMT400021713	21135	Tetracycline transporter	0.960703	3.81131e-05
StLNC1651	PGSC0003DMG400022871	PGSC0003DMT400058871	21130	Gene of unknown function	0.959721	4.1511e-05
StLNC0764	PGSC0003DMG400018822	PGSC0003DMT400048460	21128	Cyclin-dependent kinases regulatory subunit	0.956307	5.50013e-05
StLNC1354	PGSC0003DMG400010528	PGSC0003DMT400027299	21055	Aspartic proteinase Asp1	0.955112	6.03773e-05
StLNC0135	PGSC0003DMG400021498	PGSC0003DMT400055372	21054	Syntaxin	0.954905	6.13474e-05
StLNC2666	PGSC0003DMG400009086	PGSC0003DMT400023467	21041	SF16	0.954438	6.35698e-05
StLNC0695	PGSC0003DMG400038058	PGSC0003DMT400088487	21024	Conserved gene of unknown function	0.953354	6.89473e-05
StLNC0020	PGSC0003DMG400036091	PGSC0003DMT400086520	20965	O-methyltransferase 3	0.953163	6.99269e-05
StLNC2043	PGSC0003DMG400035349	PGSC0003DMT400085778	20892	Gene of unknown function	0.952965	7.09534e-05
StLNC0901	PGSC0003DMG400032169	PGSC0003DMT400081953	20880	Oxoglutarate malate translocator	0.952875	7.14261e-05
StLNC2753	PGSC0003DMG400032169	PGSC0003DMT400081953	20874	Oxoglutarate malate translocator	0.960856	3.76035e-05
StLNC1145	PGSC0003DMG400032169	PGSC0003DMT400081953	20874	Oxoglutarate malate translocator	0.979813	3.77359e-06
StLNC0931	PGSC0003DMG400009332	PGSC0003DMT400024144	20864	Protein HVA22	0.979658	3.87531e-06
StLNC1795	PGSC0003DMG400038559	PGSC0003DMT400088988	20835	Conserved gene of unknown function	0.979572	3.93274e-06
StLNC0865	PGSC0003DMG400027306	PGSC0003DMT400070235	20800	Gene of unknown function	0.978476	4.71698e-06
StLNC2270	PGSC0003DMG400025279	PGSC0003DMT400065060	20792	MADS-box transcription factor FBP22	0.977774	5.27347e-06
StLNC0957	PGSC0003DMG400012073	PGSC0003DMT400031487	20778	Camphor resistance CrcB family protein	0.976994	5.94617e-06
StLNC2824	PGSC0003DMG400006668	PGSC0003DMT400017083	20611	Conserved gene of unknown function	0.97608	6.80866e-06
StLNC0214	PGSC0003DMG400032169	PGSC0003DMT400081953	20569	Oxoglutarate malate translocator	0.975998	6.89001e-06
StLNC1189	PGSC0003DMG400032169	PGSC0003DMT400081953	20566	Oxoglutarate malate translocator	0.973874	9.25148e-06
StLNC0613	PGSC0003DMG400008751	PGSC0003DMT400022573	20521	Conserved gene of unknown function	0.973805	9.33608e-06
StLNC0534	PGSC0003DMG400045237	PGSC0003DMT400095666	20498	Acyltransferase	0.973493	9.72837e-06
StLNC1690	PGSC0003DMG400045237	PGSC0003DMT400095666	20488	Acyltransferase	0.973008	1.03617e-05
StLNC1865	PGSC0003DMG400003436	PGSC0003DMT400008843	20295	RNA-binding protein containing a PIN domain	0.972176	1.15137e-05
StLNC2014	PGSC0003DMG400001883	PGSC0003DMT400004751	20294	Protein brittle-1, chloroplast	0.972168	1.15251e-05
StLNC0748	PGSC0003DMG400001883	PGSC0003DMT400004751	20256	Protein brittle-1, chloroplast	0.969971	1.50027e-05
StLNC2349	PGSC0003DMG400003691	PGSC0003DMT400009471	20241	Phenylcoumaran benzylic ether reductase	0.969857	1.52011e-05
StLNC0025	PGSC0003DMG400036853	PGSC0003DMT400087282	20219	Late blight resistance protein	0.969625	1.5612e-05
StLNC1734	PGSC0003DMG400047305	PGSC0003DMT400097734	20022	Gene of unknown function	0.969266	1.62613e-05
StLNC0588	PGSC0003DMG400005597	PGSC0003DMT400014271	19974	MTD1	0.968936	1.68749e-05
StLNC2381	PGSC0003DMG400018090	PGSC0003DMT400046598	19955	F-box family protein	0.968513	1.7685e-05
StLNC0132	PGSC0003DMG400020760	PGSC0003DMT400053519	19894	Ankyrin repeat-containing protein	0.968502	1.7707e-05
StLNC0247	PGSC0003DMG400008521	PGSC0003DMT400021974	19784	Gene of unknown function	0.968284	1.81351e-05
StLNC0513	PGSC0003DMG400009330	PGSC0003DMT400024138	19758	Lyase	0.96793	1.88476e-05
StLNC1524	PGSC0003DMG400012903	PGSC0003DMT400033597	19539	Kinase family protein	0.967479	1.97839e-05
StLNC0909	PGSC0003DMG400012903	PGSC0003DMT400033597	19527	Kinase family protein	0.967443	1.98594e-05
StLNC0734	PGSC0003DMG400009831	PGSC0003DMT400025466	19443	Late blight resistance protein	0.966401	2.21511e-05
StLNC1878	PGSC0003DMG400009943	PGSC0003DMT400025756	19345	Cyclin B	0.966398	2.21593e-05
StLNC1251	PGSC0003DMG400009943	PGSC0003DMT400025756	19224	Cyclin B	0.966113	2.28177e-05
StLNC1252	PGSC0003DMG400043722	PGSC0003DMT400094151	19194	DNA binding protein	0.96595	2.31988e-05
StLNC0248	PGSC0003DMG400001858	PGSC0003DMT400004695	19188	Conserved gene of unknown function	0.965793	2.35734e-05
StLNC2569	PGSC0003DMG400027943	PGSC0003DMT400071820	19169	ER lumen retaining receptor family	0.965165	2.51078e-05
StLNC2291	PGSC0003DMG400027943	PGSC0003DMT400071820	19167	ER lumen retaining receptor family	0.964557	2.6659e-05
StLNC1751	PGSC0003DMG400044583	PGSC0003DMT400095012	19133	Gene of unknown function	0.963965	2.82329e-05
StLNC2072	PGSC0003DMG400045126	PGSC0003DMT400095555	19132	Gene of unknown function	0.963824	2.86173e-05
StLNC2059	PGSC0003DMG400012063	PGSC0003DMT400031457	18838	Conserved gene of unknown function	0.963326	3.00062e-05
StLNC2122	PGSC0003DMG400012063	PGSC0003DMT400031457	18838	Conserved gene of unknown function	0.962323	3.29456e-05
StLNC1477	PGSC0003DMG400003612	PGSC0003DMT400009303	18836	Glycosyltransferase	0.961897	3.42524e-05
StLNC1052	PGSC0003DMG400030005	PGSC0003DMT400077160	18830	Poly(A) polymerase	0.96155	3.53453e-05
StLNC2035	PGSC0003DMG400002307	PGSC0003DMT400005944	18822	Gene of unknown function	0.961506	3.54837e-05
StLNC2712	PGSC0003DMG400034525	PGSC0003DMT400084954	18811	Gene of unknown function	0.961443	3.56854e-05
StLNC0888	PGSC0003DMG400032130	PGSC0003DMT400081830	18724	NL0E	0.960749	3.79586e-05
StLNC0146	PGSC0003DMG400002307	PGSC0003DMT400005944	18721	Gene of unknown function	0.960486	3.88475e-05
StLNC0807	PGSC0003DMG400021745	PGSC0003DMT400055978	18703	Mechanosensitive ion channel domain-containing protein	0.959579	4.20219e-05
StLNC1425	PGSC0003DMG400026452	PGSC0003DMT400068012	18683	Cell division protein FtsH	0.959264	4.31668e-05
StLNC0320	PGSC0003DMG400045752	PGSC0003DMT400096181	18679	Integrase core domain containing protein	0.958089	4.76269e-05
StLNC1931	PGSC0003DMG400035751	PGSC0003DMT400086180	18625	Gene of unknown function	0.957888	4.84206e-05
StLNC1843	PGSC0003DMG400035751	PGSC0003DMT400086180	18619	Gene of unknown function	0.957783	4.88422e-05
StLNC2113	PGSC0003DMG400002706	PGSC0003DMT400007007	18613	Vacuolar protein sorting 13C protein	0.957184	5.12788e-05
StLNC1824	PGSC0003DMG400044220	PGSC0003DMT400094649	18612	Gene of unknown function	0.956877	5.25625e-05
StLNC1337	PGSC0003DMG400012063	PGSC0003DMT400031457	18444	Conserved gene of unknown function	0.955796	5.72588e-05
StLNC2369	PGSC0003DMG400012063	PGSC0003DMT400031457	18439	Conserved gene of unknown function	0.955745	5.74849e-05
StLNC1279	PGSC0003DMG400012063	PGSC0003DMT400031457	18436	Conserved gene of unknown function	0.955107	6.04018e-05
StLNC0927	PGSC0003DMG400012063	PGSC0003DMT400031457	18435	Conserved gene of unknown function	0.954253	6.44663e-05
StLNC0657	PGSC0003DMG400021481	PGSC0003DMT400055341	18430	Gene of unknown function	0.95394	6.60041e-05
StLNC0480	PGSC0003DMG400012063	PGSC0003DMT400031457	18427	Conserved gene of unknown function	0.953714	6.7128e-05
StLNC2263	PGSC0003DMG400035784	PGSC0003DMT400086213	18356	Gene of unknown function	0.953622	6.75879e-05
StLNC2345	PGSC0003DMG400025591	PGSC0003DMT400065747	18332	Gene of unknown function	0.95324	6.9533e-05
StLNC0080	PGSC0003DMG400025109	PGSC0003DMT400064623	18319	Gene of unknown function	0.950056	8.72858e-05
StLNC1655	PGSC0003DMG400016074	PGSC0003DMT400041473	18183	Conserved gene of unknown function	0.979906	3.71346e-06
StLNC1352	PGSC0003DMG400016446	PGSC0003DMT400042414	18136	Conserved gene of unknown function	0.97782	5.23628e-06
StLNC0192	PGSC0003DMG400033353	PGSC0003DMT400083497	18079	Non-LTR retroelement reverse transcriptase	0.976916	6.0161e-06
StLNC2237	PGSC0003DMG400033353	PGSC0003DMT400083497	18079	Non-LTR retroelement reverse transcriptase	0.976486	6.41486e-06
StLNC0085	PGSC0003DMG400025586	PGSC0003DMT400065742	18041	Non-LTR reverse transcriptase	0.976416	6.48225e-06
StLNC0939	PGSC0003DMG400025586	PGSC0003DMT400065742	18027	Non-LTR reverse transcriptase	0.97624	6.65203e-06
StLNC0249	PGSC0003DMG400025586	PGSC0003DMT400065742	18027	Non-LTR reverse transcriptase	0.975296	7.61582e-06
StLNC2599	PGSC0003DMG400042188	PGSC0003DMT400092617	17941	Monooxygenase	0.974972	7.96953e-06
StLNC1710	PGSC0003DMG400046162	PGSC0003DMT400096591	17787	NB-ARC domain containing protein	0.974905	8.04305e-06
StLNC2053	PGSC0003DMG400026698	PGSC0003DMT400068662	17668	Endonuclease/exonuclease/phosphatase	0.974242	8.80639e-06
StLNC0478	PGSC0003DMG400045088	PGSC0003DMT400095517	17609	Gene of unknown function	0.974046	9.04178e-06
StLNC2600	PGSC0003DMG400027954	PGSC0003DMT400071849	17587	Vacuolar proton atpase	0.972288	1.13528e-05
StLNC1239	PGSC0003DMG400024141	PGSC0003DMT400062036	17541	Transporter	0.971348	1.27475e-05
StLNC1277	PGSC0003DMG400036134	PGSC0003DMT400086563	17540	Gene of unknown function	0.971207	1.29664e-05
StLNC1772	PGSC0003DMG400036134	PGSC0003DMT400086563	17540	Gene of unknown function	0.971008	1.32806e-05
StLNC2640	PGSC0003DMG400036134	PGSC0003DMT400086563	17540	Gene of unknown function	0.970855	1.35247e-05
StLNC0019	PGSC0003DMG400036134	PGSC0003DMT400086563	17540	Gene of unknown function	0.970836	1.3555e-05
StLNC2761	PGSC0003DMG400002663	PGSC0003DMT400006861	17396	APO protein 3, mitochondrial	0.97049	1.41218e-05
StLNC0289	PGSC0003DMG400009876	PGSC0003DMT400025559	17382	Conserved gene of unknown function	0.97043	1.42228e-05
StLNC2373	PGSC0003DMG400037465	PGSC0003DMT400087894	17296	Conserved gene of unknown function	0.969767	1.53597e-05
StLNC1718	PGSC0003DMG400001166	PGSC0003DMT400002969	17222	RNA-directed DNA polymerase (Reverse transcriptase)	0.968965	1.6821e-05
StLNC2490	PGSC0003DMG400004095	PGSC0003DMT400010484	17080	Ferredoxin--NADP reductase, root-type isozyme, chloroplastic	0.968682	1.73586e-05
StLNC0114	PGSC0003DMG400045101	PGSC0003DMT400095530	17052	Resistance gene analog NBS7	0.96828	1.81434e-05
StLNC0653	PGSC0003DMG400024196	PGSC0003DMT400062170	17032	Gene of unknown function	0.966547	2.18191e-05
StLNC0896	PGSC0003DMG400001858	PGSC0003DMT400004695	16853	Conserved gene of unknown function	0.966376	2.22093e-05
StLNC0389	PGSC0003DMG400003290	PGSC0003DMT400008506	16853	Conserved gene of unknown function	0.966027	2.30193e-05
StLNC2572	PGSC0003DMG400003290	PGSC0003DMT400008506	16853	Conserved gene of unknown function	0.96452	2.6756e-05
StLNC2693	PGSC0003DMG400003290	PGSC0003DMT400008506	16851	Conserved gene of unknown function	0.964198	2.76054e-05
StLNC0621	PGSC0003DMG400003290	PGSC0003DMT400008506	16838	Conserved gene of unknown function	0.963432	2.97064e-05
StLNC0102	PGSC0003DMG400042413	PGSC0003DMT400092842	16566	Gene of unknown function	0.963281	3.01343e-05
StLNC1249	PGSC0003DMG400014669	PGSC0003DMT400038040	16528	Gene of unknown function	0.962758	3.16452e-05
StLNC2634	PGSC0003DMG400043985	PGSC0003DMT400094414	16474	RNA recognition motif-containing protein	0.962264	3.31228e-05
StLNC2395	PGSC0003DMG400006795	PGSC0003DMT400017509	16434	TRNA-dihydrouridine synthase A	0.962222	3.32521e-05
StLNC2796	PGSC0003DMG400009734	PGSC0003DMT400025186	16404	Conserved gene of unknown function	0.961401	3.58219e-05
StLNC0029	PGSC0003DMG400009777	PGSC0003DMT400025330	16303	Aminodeoxychorismate synthase/glutamine amidotransferase	0.961388	3.58647e-05
StLNC0120	PGSC0003DMG400038483	PGSC0003DMT400088912	16269	Gene of unknown function	0.961296	3.61601e-05
StLNC0644	PGSC0003DMG400038483	PGSC0003DMT400088912	16262	Gene of unknown function	0.961237	3.63524e-05
StLNC1281	PGSC0003DMG400009680	PGSC0003DMT400025065	16252	Zinc knuckle family protein	0.961236	3.63527e-05
StLNC2117	PGSC0003DMG400008026	PGSC0003DMT400020708	16202	26S proteasome non-ATPase regulatory subunit	0.960748	3.79633e-05
StLNC1652	PGSC0003DMG400043970	PGSC0003DMT400094399	16201	Gene of unknown function	0.959624	4.18604e-05
StLNC0837	PGSC0003DMG400017461	PGSC0003DMT400045033	16169	Transposon protein	0.959252	4.32077e-05
StLNC2706	PGSC0003DMG400019565	PGSC0003DMT400050339	16160	PAF1 complex component	0.958727	4.51648e-05
StLNC1178	PGSC0003DMG400021982	PGSC0003DMT400056547	16139	S-protein homologue	0.958629	4.55374e-05
StLNC2603	PGSC0003DMG400021982	PGSC0003DMT400056547	16108	S-protein homologue	0.958289	4.6847e-05
StLNC1996	PGSC0003DMG400025206	PGSC0003DMT400064904	16085	Acyltransferase	0.958249	4.70001e-05
StLNC2443	PGSC0003DMG400047067	PGSC0003DMT400097496	16062	Conserved gene of unknown function	0.958233	4.70624e-05
StLNC1955	PGSC0003DMG400014959	PGSC0003DMT400038710	16003	Acyltransferase	0.955895	5.68179e-05
StLNC0008	PGSC0003DMG400016943	PGSC0003DMT400043636	15876	Hypothetical Ser-Thr protein kinase	0.955865	5.69503e-05
StLNC0170	PGSC0003DMG400014329	PGSC0003DMT400037162	15869	F-box family protein	0.955565	5.83011e-05
StLNC1936	PGSC0003DMG400014983	PGSC0003DMT400038770	15842	RNase H family protein	0.955485	5.86621e-05
StLNC2579	PGSC0003DMG400038483	PGSC0003DMT400088912	15808	Gene of unknown function	0.954517	6.31899e-05
StLNC1617	PGSC0003DMG400032785	PGSC0003DMT400082728	15746	Conserved gene of unknown function	0.954146	6.49872e-05
StLNC2169	PGSC0003DMG400009370	PGSC0003DMT400024256	15719	Gene of unknown function	0.954027	6.55728e-05
StLNC0010	PGSC0003DMG400014526	PGSC0003DMT400037661	15653	Conserved gene of unknown function	0.953806	6.66666e-05
StLNC1957	PGSC0003DMG400018428	PGSC0003DMT400047416	15611	Bacterial spot disease resistance protein 4	0.953676	6.73178e-05
StLNC1675	PGSC0003DMG400037465	PGSC0003DMT400087894	15506	Conserved gene of unknown function	0.952759	7.20352e-05
StLNC1255	PGSC0003DMG400043527	PGSC0003DMT400093956	15485	Gene of unknown function	0.952743	7.21165e-05
StLNC2702	PGSC0003DMG400013887	PGSC0003DMT400036055	15459	Conserved gene of unknown function	0.951409	7.9394e-05
StLNC1464	PGSC0003DMG400026698	PGSC0003DMT400068662	15405	Endonuclease/exonuclease/phosphatase	0.951284	8.00997e-05
StLNC1323	PGSC0003DMG400037042	PGSC0003DMT400087471	15405	Gene of unknown function	0.953612	6.76384e-05
StLNC0725	PGSC0003DMG400004011	PGSC0003DMT400010253	15353	ALCATRAZ/SPATULA	0.965697	2.38018e-05
StLNC2171	PGSC0003DMG400019106	PGSC0003DMT400049159	15308	Type II DNA topoisomerase VI subunit B	0.951841	7.69806e-05
StLNC0578	PGSC0003DMG400023088	PGSC0003DMT400059421	15211	Gene of unknown function	0.979339	4.0905e-06
StLNC1593	PGSC0003DMG400010249	PGSC0003DMT400026549	15186	GDSL esterase/lipase	0.978895	4.40523e-06
StLNC2850	PGSC0003DMG400043564	PGSC0003DMT400093993	15176	Gene of unknown function	0.977666	5.36383e-06
StLNC0047	PGSC0003DMG400020858	PGSC0003DMT400053766	15153	Condensin complex subunit 1	0.9774	5.589e-06
StLNC2836	PGSC0003DMG400037458	PGSC0003DMT400087887	15133	Polyprotein protein	0.977312	5.66505e-06
StLNC0949	PGSC0003DMG400016797	PGSC0003DMT400043270	15080	ATP-binding cassette transporter	0.977027	5.9167e-06
StLNC1758	PGSC0003DMG400016685	PGSC0003DMT400043020	14994	Receptor protein kinase CLAVATA1	0.976379	6.51689e-06
StLNC0241	PGSC0003DMG400024131	PGSC0003DMT400062005	14978	Gene of unknown function	0.975307	7.6044e-06
StLNC0693	PGSC0003DMG400016849	PGSC0003DMT400043405	14973	Protease Do-like 2, chloroplastic	0.975139	7.78597e-06
StLNC0934	PGSC0003DMG401017193	PGSC0003DMT400044270	14807	Mini zinc finger 1	0.97471	8.26288e-06
StLNC1139	PGSC0003DMG400038483	PGSC0003DMT400088912	14792	Gene of unknown function	0.974538	8.45972e-06
StLNC0385	PGSC0003DMG400038483	PGSC0003DMT400088912	14767	Gene of unknown function	0.974222	8.83084e-06
StLNC1315	PGSC0003DMG400038483	PGSC0003DMT400088912	14767	Gene of unknown function	0.974181	8.87952e-06
StLNC1236	PGSC0003DMG400014961	PGSC0003DMT400038713	14757	Gene of unknown function	0.973794	9.35028e-06
StLNC0223	PGSC0003DMG400005354	PGSC0003DMT400013693	14702	Gene of unknown function	0.973025	1.0338e-05
StLNC0647	PGSC0003DMG400026612	PGSC0003DMT400068436	14553	Conserved gene of unknown function	0.972923	1.04754e-05
StLNC1365	PGSC0003DMG400003356	PGSC0003DMT400008658	14518	TMV resistance protein N	0.972883	1.05287e-05
StLNC0401	PGSC0003DMG400040619	PGSC0003DMT400091048	14503	Cytochrome P450	0.972269	1.13799e-05
StLNC2082	PGSC0003DMG400033089	PGSC0003DMT400083168	14487	Conserved gene of unknown function	0.971646	1.22922e-05
StLNC2777	PGSC0003DMG400046721	PGSC0003DMT400097150	14442	Gag-pol polyprotein	0.970954	1.33666e-05
StLNC0294	PGSC0003DMG400035682	PGSC0003DMT400086111	14339	Gene of unknown function	0.969411	1.5997e-05
StLNC0462	PGSC0003DMG400035682	PGSC0003DMT400086111	14337	Gene of unknown function	0.968685	1.73524e-05
StLNC0773	PGSC0003DMG400019106	PGSC0003DMT400049159	14195	Type II DNA topoisomerase VI subunit B	0.968487	1.77364e-05
StLNC2737	PGSC0003DMG400009763	PGSC0003DMT400025276	14180	Gene of unknown function	0.967715	1.92897e-05
StLNC1883	PGSC0003DMG400009763	PGSC0003DMT400025276	14172	Gene of unknown function	0.966965	2.08886e-05
StLNC1506	PGSC0003DMG400009763	PGSC0003DMT400025276	14171	Gene of unknown function	0.966761	2.13395e-05
StLNC0307	PGSC0003DMG400009763	PGSC0003DMT400025276	14162	Gene of unknown function	0.96656	2.17893e-05
StLNC1809	PGSC0003DMG400017033	PGSC0003DMT400043891	14154	Conserved gene of unknown function	0.966067	2.29239e-05
StLNC0195	PGSC0003DMG400041975	PGSC0003DMT400092404	14140	Gene of unknown function	0.965009	2.5498e-05
StLNC2194	PGSC0003DMG400009763	PGSC0003DMT400025276	14140	Gene of unknown function	0.963498	2.95224e-05
StLNC0150	PGSC0003DMG400004667	PGSC0003DMT400011891	14135	Rhg4-like receptor kinase II	0.963488	2.955e-05
StLNC1119	PGSC0003DMG400004667	PGSC0003DMT400011891	14124	Rhg4-like receptor kinase II	0.963427	2.97205e-05
StLNC0737	PGSC0003DMG400009763	PGSC0003DMT400025276	14107	Gene of unknown function	0.962792	3.15451e-05
StLNC2511	PGSC0003DMG400040610	PGSC0003DMT400091039	14024	'chromo' domain containing protein	0.962065	3.37318e-05
StLNC0511	PGSC0003DMG400041275	PGSC0003DMT400091704	14015	Gene of unknown function	0.96174	3.47435e-05
StLNC1048	PGSC0003DMG400037333	PGSC0003DMT400087762	13989	Late blight resistance protein homolog R1C-3	0.96149	3.55349e-05
StLNC1254	PGSC0003DMG400021028	PGSC0003DMT400054213	13969	Conserved gene of unknown function	0.961441	3.56932e-05
StLNC1175	PGSC0003DMG400046383	PGSC0003DMT400096812	13946	Gag-pol protein	0.95865	4.54585e-05
StLNC2691	PGSC0003DMG400024329	PGSC0003DMT400062515	13938	Peroxidase 27	0.957305	5.07781e-05
StLNC0139	PGSC0003DMG400032127	PGSC0003DMT400081823	13897	Conserved gene of unknown function	0.956628	5.36184e-05
StLNC1314	PGSC0003DMG400044622	PGSC0003DMT400095051	13819	Gene of unknown function	0.956592	5.37737e-05
StLNC2825	PGSC0003DMG400027609	PGSC0003DMT400070983	13790	Protein disulfide isomerase	0.956259	5.5214e-05
StLNC1022	PGSC0003DMG400022660	PGSC0003DMT400058344	13749	F-box family protein	0.955461	5.87725e-05
StLNC2451	PGSC0003DMG400030970	PGSC0003DMT400079538	13733	Conserved gene of unknown function	0.955383	5.91292e-05
StLNC1006	PGSC0003DMG400029220	PGSC0003DMT400075120	13655	Tospovirus resistance protein A	0.955202	5.9962e-05
StLNC0430	PGSC0003DMG400039986	PGSC0003DMT400090415	13639	Integrase core domain containing protein	0.954916	6.12947e-05
StLNC0299	PGSC0003DMG400007534	PGSC0003DMT400019487	13453	Gb protein	0.95459	6.28391e-05
StLNC1637	PGSC0003DMG400019373	PGSC0003DMT400049861	13412	Protein phosphatase 2c	0.953736	6.70193e-05
StLNC1803	PGSC0003DMG401028727	PGSC0003DMT400073919	13353	Conserved gene of unknown function	0.953522	6.80971e-05
StLNC0977	PGSC0003DMG400030270	PGSC0003DMT400077817	13343	RNase H family protein	0.953248	6.94893e-05
StLNC0603	PGSC0003DMG400030270	PGSC0003DMT400077817	13339	RNase H family protein	0.952851	7.15505e-05
StLNC0043	PGSC0003DMG400030270	PGSC0003DMT400077817	13339	RNase H family protein	0.952468	7.35758e-05
StLNC1602	PGSC0003DMG400009831	PGSC0003DMT400025466	13312	Late blight resistance protein	0.95161	7.82669e-05
StLNC1492	PGSC0003DMG400014329	PGSC0003DMT400037162	13291	F-box family protein	0.950319	8.5714e-05
StLNC1067	PGSC0003DMG400010876	PGSC0003DMT400028200	13277	Gene of unknown function	0.975262	7.65277e-06
StLNC0426	PGSC0003DMG400009787	PGSC0003DMT400025349	13277	Leucine-rich repeat resistance protein	0.956508	5.41348e-05
StLNC2219	PGSC0003DMG400024196	PGSC0003DMT400062170	13276	Gene of unknown function	0.954564	6.29656e-05
StLNC2749	PGSC0003DMG400009787	PGSC0003DMT400025349	13234	Leucine-rich repeat resistance protein	0.950619	8.39402e-05
StLNC1635	PGSC0003DMG400032127	PGSC0003DMT400081823	13215	Conserved gene of unknown function	0.955481	5.86795e-05
StLNC1301	PGSC0003DMG400009787	PGSC0003DMT400025349	13209	Leucine-rich repeat resistance protein	0.955291	5.95498e-05
StLNC2100	PGSC0003DMG400032127	PGSC0003DMT400081823	13197	Conserved gene of unknown function	0.975139	7.78594e-06
StLNC0374	PGSC0003DMG400032127	PGSC0003DMT400081823	13188	Conserved gene of unknown function	0.979118	4.24546e-06
StLNC0702	PGSC0003DMG400012820	PGSC0003DMT400033373	13186	Calmodulin	0.977872	5.19344e-06
StLNC0645	PGSC0003DMG400027873	PGSC0003DMT400071652	13180	Dihydrolipoamide succinyltransferase component of 2-oxoglutarate dehydrogenase	0.977306	5.67e-06
StLNC2562	PGSC0003DMG400014329	PGSC0003DMT400037162	13178	F-box family protein	0.973152	1.01698e-05
StLNC0550	PGSC0003DMG400024748	PGSC0003DMT400063677	13161	Histone H2A.1	0.973082	1.02631e-05
StLNC2494	PGSC0003DMG400024748	PGSC0003DMT400063677	13160	Histone H2A.1	0.972594	1.09231e-05
StLNC0755	PGSC0003DMG400025665	PGSC0003DMT400065940	13109	Conserved gene of unknown function	0.9724	1.11949e-05
StLNC1116	PGSC0003DMG400004593	PGSC0003DMT400011693	13087	Chitinase	0.968401	1.79053e-05
StLNC1399	PGSC0003DMG402016693	PGSC0003DMT400043047	13072	Ubiquitin-protein ligase	0.96819	1.8323e-05
StLNC0433	PGSC0003DMG400021481	PGSC0003DMT400055341	13063	Gene of unknown function	0.966934	2.09578e-05
StLNC1983	PGSC0003DMG400003362	PGSC0003DMT400008673	13042	DICHOTOMA	0.964381	2.71205e-05
StLNC0930	PGSC0003DMG400023032	PGSC0003DMT400059281	12996	Phosphoribosylformylglycinamidine cyclo-ligase	0.96436	2.71741e-05
StLNC1505	PGSC0003DMG400029086	PGSC0003DMT400074806	12941	Conserved gene of unknown function	0.964162	2.77021e-05
StLNC2165	PGSC0003DMG401021263	PGSC0003DMT400054788	12936	Peptide N-glycanase	0.964014	2.80997e-05
StLNC2233	PGSC0003DMG400017665	PGSC0003DMT400045551	12903	DNA binding protein	0.963173	3.0442e-05
StLNC0088	PGSC0003DMG400042845	PGSC0003DMT400093274	12902	'chromo' domain containing protein	0.962681	3.18746e-05
StLNC0757	PGSC0003DMG400042845	PGSC0003DMT400093274	12900	'chromo' domain containing protein	0.962619	3.20578e-05
StLNC1297	PGSC0003DMG400038240	PGSC0003DMT400088669	12884	Conserved gene of unknown function	0.961665	3.49797e-05
StLNC1412	PGSC0003DMG400018090	PGSC0003DMT400046598	12849	F-box family protein	0.961609	3.5156e-05
StLNC2208	PGSC0003DMG400019858	PGSC0003DMT400051126	12828	Pentatricopeptide repeat-containing protein	0.961275	3.62279e-05
StLNC0124	PGSC0003DMG400040811	PGSC0003DMT400091240	12694	Gene of unknown function	0.961125	3.67169e-05
StLNC0938	PGSC0003DMG401006646	PGSC0003DMT400017021	12684	Transposon MuDR mudrA	0.960831	3.7686e-05
StLNC0212	PGSC0003DMG401016632	PGSC0003DMT400042894	12663	N(2),N(2)-dimethylguanosine tRNA methyltransferase	0.960796	3.78029e-05
StLNC2586	PGSC0003DMG400015786	PGSC0003DMT400040825	12658	Conserved gene of unknown function	0.959396	4.26839e-05
StLNC2120	PGSC0003DMG401021263	PGSC0003DMT400054788	12557	Peptide N-glycanase	0.958985	4.41981e-05
StLNC0118	PGSC0003DMG400009163	PGSC0003DMT400023685	12511	Conserved gene of unknown function	0.95864	4.54951e-05
StLNC0036	PGSC0003DMG402011252	PGSC0003DMT400029266	12481	Linalool synthase	0.957957	4.8147e-05
StLNC2853	PGSC0003DMG400032127	PGSC0003DMT400081823	12442	Conserved gene of unknown function	0.95785	4.8572e-05
StLNC1905	PGSC0003DMG400032127	PGSC0003DMT400081823	12442	Conserved gene of unknown function	0.956036	5.6193e-05
StLNC2820	PGSC0003DMG400032127	PGSC0003DMT400081823	12442	Conserved gene of unknown function	0.954988	6.09567e-05
StLNC1808	PGSC0003DMG400006733	PGSC0003DMT400017277	12441	Thioredoxin-like U5 small ribonucleoprotein particle protein	0.954418	6.36665e-05
StLNC1989	PGSC0003DMG400032127	PGSC0003DMT400081823	12390	Conserved gene of unknown function	0.954185	6.47986e-05
StLNC2056	PGSC0003DMG400006733	PGSC0003DMT400017277	12387	Thioredoxin-like U5 small ribonucleoprotein particle protein	0.952499	7.34107e-05
StLNC0419	PGSC0003DMG400047157	PGSC0003DMT400097586	12375	Gene of unknown function	0.951133	8.09628e-05
StLNC0713	PGSC0003DMG400019396	PGSC0003DMT400049910	12316	Conserved gene of unknown function	0.950525	8.44928e-05
StLNC1090	PGSC0003DMG400024326	PGSC0003DMT400062505	12306	Gene of unknown function	0.979092	4.26366e-06
StLNC1766	PGSC0003DMG400004010	PGSC0003DMT400010250	12274	Conserved gene of unknown function	0.972471	1.10946e-05
StLNC1306	PGSC0003DMG400005866	PGSC0003DMT400015028	12245	Ubiquitin-protein ligase	0.969306	1.61876e-05
StLNC2834	PGSC0003DMG400004010	PGSC0003DMT400010250	12232	Conserved gene of unknown function	0.962564	3.22207e-05
StLNC2755	PGSC0003DMG400001565	PGSC0003DMT400003980	12230	HB2 homeodomain protein	0.958986	4.41914e-05
StLNC0607	PGSC0003DMG400001565	PGSC0003DMT400003980	12216	HB2 homeodomain protein	0.95733	5.06781e-05
StLNC2377	PGSC0003DMG400010325	PGSC0003DMT400026717	12207	Serine-threonine protein kinase, plant-type	0.957228	5.10978e-05
StLNC0295	PGSC0003DMG401000506	PGSC0003DMT400001354	12194	Alpha-DOX2	0.953027	7.06306e-05
StLNC0795	PGSC0003DMG400004667	PGSC0003DMT400011891	12101	Rhg4-like receptor kinase II	0.952277	7.46056e-05
StLNC1783	PGSC0003DMG400011334	PGSC0003DMT400029476	12086	Phylloplanin	0.951008	8.1677e-05
StLNC1364	PGSC0003DMG400015842	PGSC0003DMT400040952	12086	Gene of unknown function	0.950894	8.23369e-05
StLNC1552	PGSC0003DMG400034669	PGSC0003DMT400085098	12077	BZIP family transcription factor	0.950694	8.34969e-05
StLNC2185	PGSC0003DMG400013199	PGSC0003DMT400034331	12073	Conserved gene of unknown function	0.951956	7.63518e-05
StLNC2282	PGSC0003DMG400019486	PGSC0003DMT400050188	12042	Golgi membrane protein sb140	0.979707	3.84283e-06
StLNC2742	PGSC0003DMG400009876	PGSC0003DMT400025559	12011	Conserved gene of unknown function	0.979157	4.21788e-06
StLNC2210	PGSC0003DMG400042188	PGSC0003DMT400092617	11993	Monooxygenase	0.979146	4.22516e-06
StLNC0676	PGSC0003DMG400022871	PGSC0003DMT400058871	11979	Gene of unknown function	0.978998	4.33048e-06
StLNC0184	PGSC0003DMG400016605	PGSC0003DMT400042787	11974	RS21-C6 protein	0.978817	4.46166e-06
StLNC1806	PGSC0003DMG400030150	PGSC0003DMT400077533	11925	Conserved gene of unknown function	0.978684	4.56022e-06
StLNC2713	PGSC0003DMG400029220	PGSC0003DMT400075120	11909	Tospovirus resistance protein A	0.978077	5.0283e-06
StLNC2293	PGSC0003DMG400017760	PGSC0003DMT400045802	11905	MADS-box protein 15	0.977766	5.28057e-06
StLNC2202	PGSC0003DMG400045115	PGSC0003DMT400095544	11885	Integrase core domain containing protein	0.977221	5.74431e-06
StLNC2032	PGSC0003DMG400007534	PGSC0003DMT400019487	11874	Gb protein	0.977191	5.77105e-06
StLNC2675	PGSC0003DMG400007534	PGSC0003DMT400019487	11862	Gb protein	0.976699	6.21514e-06
StLNC0910	PGSC0003DMG400017760	PGSC0003DMT400045802	11846	MADS-box protein 15	0.975934	6.95408e-06
StLNC2765	PGSC0003DMG400017760	PGSC0003DMT400045802	11846	MADS-box protein 15	0.975182	7.73918e-06
StLNC2651	PGSC0003DMG400008702	PGSC0003DMT400022454	11747	Gene of unknown function	0.975025	7.91101e-06
StLNC2498	PGSC0003DMG400018298	PGSC0003DMT400047159	11723	Serine/threonine-protein kinase PBS1	0.974607	8.38035e-06
StLNC0589	PGSC0003DMG400007534	PGSC0003DMT400019487	11721	Gb protein	0.974585	8.40512e-06
StLNC0311	PGSC0003DMG400014768	PGSC0003DMT400038277	11713	Transcription regulator/ zinc ion binding	0.974453	8.55799e-06
StLNC2048	PGSC0003DMG400007534	PGSC0003DMT400019487	11688	Gb protein	0.973734	9.42537e-06
StLNC1736	PGSC0003DMG400006794	PGSC0003DMT400017493	11678	PHD finger family protein	0.972982	1.03961e-05
StLNC1665	PGSC0003DMG400037399	PGSC0003DMT400087828	11637	Gene of unknown function	0.972623	1.08834e-05
StLNC2732	PGSC0003DMG400014061	PGSC0003DMT400036504	11554	Receptor kinase	0.970998	1.32958e-05
StLNC1570	PGSC0003DMG400002008	PGSC0003DMT400005076	11531	Protein ycf2	0.970096	1.4788e-05
StLNC2001	PGSC0003DMG400006462	PGSC0003DMT400016546	11503	GDSL-like Lipase/Acylhydrolase family protein	0.969679	1.55162e-05
StLNC2580	PGSC0003DMG400037863	PGSC0003DMT400088292	11499	Gene of unknown function	0.96932	1.61622e-05
StLNC1660	PGSC0003DMG400007753	PGSC0003DMT400020039	11492	Wound-induced basic protein	0.969264	1.62649e-05
StLNC2276	PGSC0003DMG400007889	PGSC0003DMT400020414	11470	Plasma membrane proton ATPase 5	0.969219	1.63469e-05
StLNC1272	PGSC0003DMG400022869	PGSC0003DMT400058866	11445	Membrane protein	0.968836	1.70647e-05
StLNC1906	PGSC0003DMG400010876	PGSC0003DMT400028200	11384	Gene of unknown function	0.968736	1.72548e-05
StLNC2716	PGSC0003DMG400032169	PGSC0003DMT400081953	11380	Oxoglutarate malate translocator	0.968348	1.80087e-05
StLNC1605	PGSC0003DMG400000425	PGSC0003DMT400001124	11373	Flavonoid 3',5'-hydroxylase	0.968072	1.85596e-05
StLNC1549	PGSC0003DMG400032127	PGSC0003DMT400081823	11362	Conserved gene of unknown function	0.967238	2.0296e-05
StLNC1001	PGSC0003DMG400009775	PGSC0003DMT400025323	11321	Ripening regulated protein DDTFR10	0.96553	2.42056e-05
StLNC2524	PGSC0003DMG400045661	PGSC0003DMT400096090	11285	Gene of unknown function	0.965323	2.4715e-05
StLNC1115	PGSC0003DMG401009189	PGSC0003DMT400023752	11268	Gene of unknown function	0.965054	2.53861e-05
StLNC1960	PGSC0003DMG400028451	PGSC0003DMT400073221	11263	ATP binding protein	0.964914	2.57388e-05
StLNC1008	PGSC0003DMG400031460	PGSC0003DMT400080772	11260	60S ribosomal protein L23	0.964825	2.5966e-05
StLNC1879	PGSC0003DMG401005535	PGSC0003DMT400014110	11232	Histone deacetylase	0.964521	2.67516e-05
StLNC0358	PGSC0003DMG400031057	PGSC0003DMT400079757	11162	Serine palmitoyltransferase	0.963552	2.93706e-05
StLNC1326	PGSC0003DMG400002732	PGSC0003DMT400007071	11156	VQ motif-containing protein	0.963508	2.94925e-05
StLNC0618	PGSC0003DMG400035437	PGSC0003DMT400085866	11138	Gene of unknown function	0.96342	2.9741e-05
StLNC1137	PGSC0003DMG400026452	PGSC0003DMT400068012	11136	Cell division protein FtsH	0.963235	3.02635e-05
StLNC1857	PGSC0003DMG400032127	PGSC0003DMT400081823	11119	Conserved gene of unknown function	0.962632	3.20173e-05
StLNC1461	PGSC0003DMG400040052	PGSC0003DMT400090481	11111	Gene of unknown function	0.962408	3.26896e-05
StLNC2075	PGSC0003DMG400031738	PGSC0003DMT400081206	11110	UPA16	0.961879	3.43073e-05
StLNC2154	PGSC0003DMG400028566	PGSC0003DMT400073535	11057	Indole-3-glycerol phosphate lyase IGL1	0.961676	3.49443e-05
StLNC2334	PGSC0003DMG402014450	PGSC0003DMT400037442	10951	ADP-ribosylation factor GTPase-activating protein AGD3	0.961649	3.50308e-05
StLNC2427	PGSC0003DMG400017616	PGSC0003DMT400045399	10945	Gene of unknown function	0.961551	3.53418e-05
StLNC2245	PGSC0003DMG400039179	PGSC0003DMT400089608	10931	Conserved gene of unknown function	0.961478	3.55748e-05
StLNC2150	PGSC0003DMG400006090	PGSC0003DMT400015598	10872	F-Box protein	0.961355	3.59686e-05
StLNC2829	PGSC0003DMG400019444	PGSC0003DMT400050060	10851	Conserved gene of unknown function	0.960195	3.98475e-05
StLNC2704	PGSC0003DMG402023562	PGSC0003DMT400060569	10850	Ubiquitin thiolesterase	0.959609	4.1912e-05
StLNC0324	PGSC0003DMG400037288	PGSC0003DMT400087717	10798	Gene of unknown function	0.959512	4.22633e-05
StLNC0580	PGSC0003DMG400015102	PGSC0003DMT400039056	10773	Retrotransposon protein	0.958803	4.48774e-05
StLNC0552	PGSC0003DMG400032127	PGSC0003DMT400081823	10773	Conserved gene of unknown function	0.958177	4.72829e-05
StLNC0597	PGSC0003DMG400032127	PGSC0003DMT400081823	10767	Conserved gene of unknown function	0.956661	5.34777e-05
StLNC0404	PGSC0003DMG400010102	PGSC0003DMT400026215	10762	Gene of unknown function	0.956446	5.44003e-05
StLNC0218	PGSC0003DMG400014983	PGSC0003DMT400038770	10735	RNase H family protein	0.955395	5.90756e-05
StLNC1157	PGSC0003DMG400001700	PGSC0003DMT400004281	10700	Conserved gene of unknown function	0.953707	6.7162e-05
StLNC0306	PGSC0003DMG400039720	PGSC0003DMT400090149	10574	Protein phosphatase 2c	0.953345	6.8997e-05
StLNC1334	PGSC0003DMG400032127	PGSC0003DMT400081823	10545	Conserved gene of unknown function	0.952391	7.39903e-05
StLNC0471	PGSC0003DMG400032127	PGSC0003DMT400081823	10528	Conserved gene of unknown function	0.951869	7.68278e-05
StLNC1698	PGSC0003DMG400017202	PGSC0003DMT400044301	10463	2-heptaprenyl-1,4-naphthoquinone methyltransferase	0.951266	8.02003e-05
StLNC2851	PGSC0003DMG400043922	PGSC0003DMT400094351	10451	Conserved gene of unknown function	0.963231	3.0275e-05
StLNC1900	PGSC0003DMG400004593	PGSC0003DMT400011693	10445	Chitinase	0.978626	4.60304e-06
StLNC0750	PGSC0003DMG400016623	PGSC0003DMT400042851	10441	Cytochrome P450	0.977825	5.23197e-06
StLNC2521	PGSC0003DMG400007990	PGSC0003DMT400020621	10429	Nucleic acid binding protein	0.97738	5.60636e-06
StLNC0034	PGSC0003DMG400009620	PGSC0003DMT400024886	10426	Cytochrome P450 71D6	0.977279	5.69354e-06
StLNC2795	PGSC0003DMG400007374	PGSC0003DMT400019030	10388	Extensin	0.97665	6.26055e-06
StLNC2798	PGSC0003DMG400023266	PGSC0003DMT400059822	10244	Gene of unknown function	0.976563	6.34279e-06
StLNC0761	PGSC0003DMG400035131	PGSC0003DMT400085560	10218	Conserved gene of unknown function	0.976098	6.79043e-06
StLNC1130	PGSC0003DMG401002977	PGSC0003DMT400007696	10210	Serine/threonine-protein kinase Nek4	0.975949	6.93871e-06
StLNC1424	PGSC0003DMG400025109	PGSC0003DMT400064623	10209	Gene of unknown function	0.975024	7.91209e-06
StLNC1620	PGSC0003DMG400010485	PGSC0003DMT400027174	10172	Poly(P)/ATP NAD kinase	0.97418	8.88076e-06
StLNC1891	PGSC0003DMG400017336	PGSC0003DMT400044685	10150	Strictosidine synthase	0.974154	8.91162e-06
StLNC0154	PGSC0003DMG401002977	PGSC0003DMT400007696	10118	Serine/threonine-protein kinase Nek4	0.974122	8.95003e-06
StLNC0048	PGSC0003DMG400019106	PGSC0003DMT400049159	10114	Type II DNA topoisomerase VI subunit B	0.973966	9.13916e-06
StLNC2771	PGSC0003DMG400019106	PGSC0003DMT400049159	10114	Type II DNA topoisomerase VI subunit B	0.972778	1.06716e-05
StLNC0463	PGSC0003DMG400019106	PGSC0003DMT400049159	10114	Type II DNA topoisomerase VI subunit B	0.97226	1.13924e-05
StLNC2139	PGSC0003DMG400040163	PGSC0003DMT400090592	10109	IB1C3-1 protein	0.971717	1.21858e-05
StLNC2080	PGSC0003DMG400019106	PGSC0003DMT400049159	10107	Type II DNA topoisomerase VI subunit B	0.971666	1.2263e-05
StLNC2114	PGSC0003DMG400019106	PGSC0003DMT400049159	10094	Type II DNA topoisomerase VI subunit B	0.970783	1.36408e-05
StLNC1908	PGSC0003DMG400017444	PGSC0003DMT400044981	10044	Conserved gene of unknown function	0.970754	1.36888e-05
StLNC0009	PGSC0003DMG400031109	PGSC0003DMT400079876	10032	Conserved gene of unknown function	0.969938	1.50605e-05
StLNC0860	PGSC0003DMG400004593	PGSC0003DMT400011693	9997	Chitinase	0.969167	1.6444e-05
StLNC2106	PGSC0003DMG400047104	PGSC0003DMT400097533	9967	Flotillin-1	0.968315	1.8075e-05
StLNC0030	PGSC0003DMG400043527	PGSC0003DMT400093956	9935	Gene of unknown function	0.967034	2.07376e-05
StLNC1780	PGSC0003DMG400002086	PGSC0003DMT400005344	9889	Vacuolar protein sorting-associated protein VPS28	0.966849	2.11449e-05
StLNC2375	PGSC0003DMG400019379	PGSC0003DMT400049874	9886	Ubiquitin ligase protein cop1	0.964533	2.67212e-05
StLNC0871	PGSC0003DMG400019748	PGSC0003DMT400050843	9880	Peroxisomal acetoacetyl-coenzyme A thiolase	0.964388	2.71019e-05
StLNC2039	PGSC0003DMG400019379	PGSC0003DMT400049874	9863	Ubiquitin ligase protein cop1	0.964212	2.75685e-05
StLNC1250	PGSC0003DMG400037164	PGSC0003DMT400087593	9833	Gene of unknown function	0.964092	2.78908e-05
StLNC0874	PGSC0003DMG400041586	PGSC0003DMT400092015	9829	Gene of unknown function	0.963945	2.82887e-05
StLNC0078	PGSC0003DMG400022537	PGSC0003DMT400058049	9811	Nuclear receptor binding set domain containing protein 1, nsd	0.96301	3.09111e-05
StLNC2085	PGSC0003DMG400009163	PGSC0003DMT400023685	9804	Conserved gene of unknown function	0.962757	3.16488e-05
StLNC1098	PGSC0003DMG400042533	PGSC0003DMT400092962	9793	Gene of unknown function	0.962286	3.30555e-05
StLNC0178	PGSC0003DMG400045267	PGSC0003DMT400095696	9781	Gene of unknown function	0.961158	3.66083e-05
StLNC0255	PGSC0003DMG400015842	PGSC0003DMT400040952	9772	Gene of unknown function	0.961156	3.66133e-05
StLNC2652	PGSC0003DMG400043922	PGSC0003DMT400094351	9743	Conserved gene of unknown function	0.961026	3.70421e-05
StLNC0808	PGSC0003DMG400028867	PGSC0003DMT400074277	9694	Reverse transcriptase	0.959972	4.06259e-05
StLNC0985	PGSC0003DMG400008083	PGSC0003DMT400020878	9654	Protein-tyrosine sulfotransferase	0.959659	4.17327e-05
StLNC0060	PGSC0003DMG400031498	PGSC0003DMT400080879	9602	Conserved gene of unknown function	0.959435	4.25428e-05
StLNC1509	PGSC0003DMG400031498	PGSC0003DMT400080879	9599	Conserved gene of unknown function	0.957272	5.09144e-05
StLNC1076	PGSC0003DMG400031498	PGSC0003DMT400080879	9595	Conserved gene of unknown function	0.956863	5.26201e-05
StLNC1650	PGSC0003DMG400000840	PGSC0003DMT400002192	9564	Hepatocellular carcinoma-associated antigen 59 family protein	0.956323	5.49317e-05
StLNC1370	PGSC0003DMG400004677	PGSC0003DMT400011911	9554	Hydroxyproline-rich glycoprotein (HRGP)	0.955645	5.79361e-05
StLNC2086	PGSC0003DMG400004677	PGSC0003DMT400011911	9554	Hydroxyproline-rich glycoprotein (HRGP)	0.955295	5.95327e-05
StLNC2084	PGSC0003DMG400004677	PGSC0003DMT400011911	9554	Hydroxyproline-rich glycoprotein (HRGP)	0.954002	6.56942e-05
StLNC2346	PGSC0003DMG400004677	PGSC0003DMT400011911	9554	Hydroxyproline-rich glycoprotein (HRGP)	0.952145	7.53209e-05
StLNC0538	PGSC0003DMG402007635	PGSC0003DMT400019764	9504	Ribonuclease z, chloroplast	0.95105	8.14353e-05
StLNC2029	PGSC0003DMG400000840	PGSC0003DMT400002192	9492	Hepatocellular carcinoma-associated antigen 59 family protein	0.950137	8.67981e-05
StLNC2146	PGSC0003DMG400034922	PGSC0003DMT400085351	9489	NB-ARC domain containing protein	0.95404	6.55092e-05
StLNC0142	PGSC0003DMG400022092	PGSC0003DMT400056808	9466	Gene of unknown function	0.961639	3.50635e-05
StLNC0699	PGSC0003DMG400000840	PGSC0003DMT400002192	9407	Hepatocellular carcinoma-associated antigen 59 family protein	0.953913	6.61368e-05
StLNC1305	PGSC0003DMG400022092	PGSC0003DMT400056808	9383	Gene of unknown function	0.953211	6.96838e-05
StLNC1120	PGSC0003DMG400022660	PGSC0003DMT400058344	9377	F-box family protein	0.960249	3.96595e-05
StLNC2488	PGSC0003DMG400022660	PGSC0003DMT400058344	9377	F-box family protein	0.95588	5.68854e-05
StLNC0504	PGSC0003DMG401016632	PGSC0003DMT400042894	9371	N(2),N(2)-dimethylguanosine tRNA methyltransferase	0.951266	8.02043e-05
StLNC1886	PGSC0003DMG400014918	PGSC0003DMT400038619	9359	Conserved gene of unknown function	0.971838	1.2007e-05
StLNC0431	PGSC0003DMG400014918	PGSC0003DMT400038619	9351	Conserved gene of unknown function	0.970127	1.47347e-05
StLNC0861	PGSC0003DMG400043922	PGSC0003DMT400094351	9333	Conserved gene of unknown function	0.969491	1.58522e-05
StLNC0555	PGSC0003DMG400045752	PGSC0003DMT400096181	9332	Integrase core domain containing protein	0.969227	1.63335e-05
StLNC1765	PGSC0003DMG400027837	PGSC0003DMT400071563	9291	Gene of unknown function	0.963704	2.89485e-05
StLNC2305	PGSC0003DMG400042533	PGSC0003DMT400092962	9274	Gene of unknown function	0.958502	4.6025e-05
StLNC2387	PGSC0003DMG400013232	PGSC0003DMT400034411	9264	Serine/threonine-protein kinase PBS1	0.954103	6.51969e-05
StLNC1633	PGSC0003DMG400024326	PGSC0003DMT400062505	9263	Gene of unknown function	0.952788	7.18807e-05
StLNC0975	PGSC0003DMG400003212	PGSC0003DMT400008338	9255	GRF domain class transcription factor	0.952752	7.20702e-05
StLNC1104	PGSC0003DMG400031412	PGSC0003DMT400080661	9240	Endomembrane protein emp70	0.964746	2.617e-05
StLNC2794	PGSC0003DMG400031412	PGSC0003DMT400080661	9239	Endomembrane protein emp70	0.958248	4.70065e-05
StLNC0316	PGSC0003DMG400030781	PGSC0003DMT400079094	9236	Transcriptional factor TINY	0.966435	2.20737e-05
StLNC2009	PGSC0003DMG402011252	PGSC0003DMT400029266	9195	Linalool synthase	0.958495	4.60508e-05
StLNC1289	PGSC0003DMG400006090	PGSC0003DMT400015598	9133	F-Box protein	0.953661	6.73961e-05
StLNC1308	PGSC0003DMG400025279	PGSC0003DMT400065060	9108	MADS-box transcription factor FBP22	0.953215	6.96605e-05
StLNC1361	PGSC0003DMG401023974	PGSC0003DMT400061585	9104	Amino acid binding protein	0.970341	1.4371e-05
StLNC2472	PGSC0003DMG400036522	PGSC0003DMT400086951	9097	Retinitis pigmentosa GTPase regulator	0.962054	3.37663e-05
StLNC1941	PGSC0003DMG400039843	PGSC0003DMT400090272	9062	Gene of unknown function	0.961731	3.47732e-05
StLNC1459	PGSC0003DMG400022660	PGSC0003DMT400058344	9060	F-box family protein	0.968777	1.71765e-05
StLNC1527	PGSC0003DMG400022660	PGSC0003DMT400058344	9058	F-box family protein	0.967475	1.9792e-05
StLNC0612	PGSC0003DMG400010575	PGSC0003DMT400027418	9050	Conserved gene of unknown function	0.960824	3.77081e-05
StLNC2092	PGSC0003DMG400023085	PGSC0003DMT400059414	9026	Zgc:64189	0.959245	4.32365e-05
StLNC1841	PGSC0003DMG400004663	PGSC0003DMT400011873	9001	Conserved gene of unknown function	0.957322	5.07091e-05
StLNC2807	PGSC0003DMG400021045	PGSC0003DMT400054252	8981	Gene of unknown function	0.956283	5.5107e-05
StLNC1981	PGSC0003DMG400004663	PGSC0003DMT400011873	8911	Conserved gene of unknown function	0.951881	7.67623e-05
StLNC0272	PGSC0003DMG400033622	PGSC0003DMT400083840	8888	Gene of unknown function	0.979413	4.03979e-06
StLNC1325	PGSC0003DMG400004663	PGSC0003DMT400011873	8871	Conserved gene of unknown function	0.976319	6.57537e-06
StLNC1779	PGSC0003DMG400004663	PGSC0003DMT400011873	8864	Conserved gene of unknown function	0.97563	7.26469e-06
StLNC0273	PGSC0003DMG400030748	PGSC0003DMT400079004	8855	Dnajc14 protein	0.969123	1.65247e-05
StLNC1807	PGSC0003DMG400010575	PGSC0003DMT400027418	8834	Conserved gene of unknown function	0.968025	1.86559e-05
StLNC2611	PGSC0003DMG400033622	PGSC0003DMT400083840	8795	Gene of unknown function	0.967374	2.00067e-05
StLNC0002	PGSC0003DMG400044220	PGSC0003DMT400094649	8778	Gene of unknown function	0.963213	3.03277e-05
StLNC0956	PGSC0003DMG400024532	PGSC0003DMT400063067	8769	Multidrug resistance protein	0.958695	4.5288e-05
StLNC1433	PGSC0003DMG400016754	PGSC0003DMT400043177	8743	Gene of unknown function	0.958658	4.54288e-05
StLNC0776	PGSC0003DMG400011934	PGSC0003DMT400031166	8740	ATP binding protein	0.955772	5.73644e-05
StLNC1024	PGSC0003DMG400016754	PGSC0003DMT400043177	8735	Gene of unknown function	0.953836	6.65203e-05
StLNC0496	PGSC0003DMG400016754	PGSC0003DMT400043177	8727	Gene of unknown function	0.952929	7.11447e-05
StLNC0024	PGSC0003DMG400017119	PGSC0003DMT400044114	8710	Flavonoid glucoyltransferase UGT73E2	0.952128	7.5412e-05
StLNC2726	PGSC0003DMG400016754	PGSC0003DMT400043177	8656	Gene of unknown function	0.950714	8.33804e-05
StLNC1380	PGSC0003DMG400016754	PGSC0003DMT400043177	8656	Gene of unknown function	0.979956	3.6815e-06
StLNC1838	PGSC0003DMG400007542	PGSC0003DMT400019516	8634	Conserved gene of unknown function	0.979748	3.81601e-06
StLNC2119	PGSC0003DMG400033898	PGSC0003DMT400084254	8623	Gene of unknown function	0.979673	3.86524e-06
StLNC2460	PGSC0003DMG400023259	PGSC0003DMT400059810	8523	Cleavage stimulation factor 50 kDa subunit	0.979089	4.26531e-06
StLNC1861	PGSC0003DMG400011425	PGSC0003DMT400029708	8512	Cc-nbs-lrr resistance protein	0.978656	4.58126e-06
StLNC0687	PGSC0003DMG400023962	PGSC0003DMT400061560	8499	Gene of unknown function	0.97862	4.60773e-06
StLNC1210	PGSC0003DMG400018886	PGSC0003DMT400048612	8490	Zinc finger protein	0.978052	5.04833e-06
StLNC2857	PGSC0003DMG400023778	PGSC0003DMT400061116	8472	Gene of unknown function	0.977904	5.1677e-06
StLNC1476	PGSC0003DMG400013784	PGSC0003DMT400035812	8429	Retrotransposon protein, unclassified	0.977549	5.46201e-06
StLNC0372	PGSC0003DMG400010250	PGSC0003DMT400026550	8429	Triacylglycerol lipase	0.976561	6.34478e-06
StLNC2697	PGSC0003DMG400045045	PGSC0003DMT400095474	8428	Conserved gene of unknown function	0.97637	6.52621e-06
StLNC0063	PGSC0003DMG400013040	PGSC0003DMT400033934	8379	Short-chain dehydrogenase	0.976071	6.81724e-06
StLNC1355	PGSC0003DMG400015854	PGSC0003DMT400040979	8374	Gene of unknown function	0.975355	7.55326e-06
StLNC0472	PGSC0003DMG400014509	PGSC0003DMT400037627	8363	BURP domain-containing protein	0.975348	7.56049e-06
StLNC1666	PGSC0003DMG400022660	PGSC0003DMT400058344	8302	F-box family protein	0.97503	7.90495e-06
StLNC2638	PGSC0003DMG400006719	PGSC0003DMT400017240	8279	Gene of unknown function	0.97471	8.26239e-06
StLNC1385	PGSC0003DMG400032531	PGSC0003DMT400082412	8275	Gene of unknown function	0.974391	8.6305e-06
StLNC2484	PGSC0003DMG400039198	PGSC0003DMT400089627	8267	Gene of unknown function	0.974153	8.9126e-06
StLNC2161	PGSC0003DMG400027876	PGSC0003DMT400071660	8259	Serine/threonine-protein phosphatase 7 long form homolog	0.973265	1.00221e-05
StLNC0551	PGSC0003DMG400022660	PGSC0003DMT400058344	8209	F-box family protein	0.972147	1.15555e-05
StLNC1408	PGSC0003DMG400022660	PGSC0003DMT400058344	8202	F-box family protein	0.971722	1.21784e-05
StLNC0652	PGSC0003DMG400041680	PGSC0003DMT400092109	8158	F-box protein	0.97117	1.30237e-05
StLNC0759	PGSC0003DMG400017202	PGSC0003DMT400044301	8148	2-heptaprenyl-1,4-naphthoquinone methyltransferase	0.971106	1.31248e-05
StLNC1786	PGSC0003DMG400013216	PGSC0003DMT400034373	8135	Gene of unknown function	0.97072	1.37436e-05
StLNC0567	PGSC0003DMG400008445	PGSC0003DMT400021753	8065	60S ribosomal protein L6	0.969373	1.60661e-05
StLNC1404	PGSC0003DMG400045267	PGSC0003DMT400095696	8011	Gene of unknown function	0.966553	2.18058e-05
StLNC2279	PGSC0003DMG400014366	PGSC0003DMT400037232	7998	Downward leaf curling protein	0.965688	2.38247e-05
StLNC0719	PGSC0003DMG400017885	PGSC0003DMT400046087	7972	Conserved gene of unknown function	0.964983	2.55643e-05
StLNC2658	PGSC0003DMG400009774	PGSC0003DMT400025322	7959	Arabinose kinase	0.964738	2.61906e-05
StLNC0942	PGSC0003DMG400034395	PGSC0003DMT400084824	7933	Gene of unknown function	0.963326	3.00058e-05
StLNC0256	PGSC0003DMG400018286	PGSC0003DMT400047124	7930	Vetispiradiene synthase	0.962274	3.30935e-05
StLNC1126	PGSC0003DMG400023517	PGSC0003DMT400060462	7927	Tic20	0.961797	3.45635e-05
StLNC1562	PGSC0003DMG400034395	PGSC0003DMT400084824	7927	Gene of unknown function	0.961735	3.47586e-05
StLNC1703	PGSC0003DMG400003551	PGSC0003DMT400009133	7922	Receptor kinase	0.961566	3.5293e-05
StLNC0064	PGSC0003DMG400012041	PGSC0003DMT400031411	7909	Zinc finger protein	0.961282	3.62066e-05
StLNC1599	PGSC0003DMG401015827	PGSC0003DMT400040919	7902	Receptor kinase	0.96106	3.69283e-05
StLNC0014	PGSC0003DMG400003211	PGSC0003DMT400008336	7871	Leucine Rich Repeat family protein	0.961051	3.69573e-05
StLNC0015	PGSC0003DMG400005741	PGSC0003DMT400014727	7857	Protein phosphatase 2C 8	0.960937	3.73351e-05
StLNC2733	PGSC0003DMG400006794	PGSC0003DMT400017493	7846	PHD finger family protein	0.960679	3.81934e-05
StLNC0361	PGSC0003DMG400001703	PGSC0003DMT400004298	7809	Protein binding / zinc ion binding	0.960398	3.91486e-05
StLNC2616	PGSC0003DMG400017461	PGSC0003DMT400045033	7795	Transposon protein	0.960166	3.99474e-05
StLNC1653	PGSC0003DMG400028959	PGSC0003DMT400074510	7791	Multicopper oxidase	0.959169	4.35153e-05
StLNC0604	PGSC0003DMG400028001	PGSC0003DMT400071965	7778	Cc-nbs-lrr resistance protein	0.957201	5.12074e-05
StLNC0398	PGSC0003DMG400035134	PGSC0003DMT400085563	7766	Storekeeper protein	0.956422	5.45026e-05
StLNC1282	PGSC0003DMG400019724	PGSC0003DMT400050783	7766	Cytochrome P450 monooxygenase CYP736B	0.956244	5.52764e-05
StLNC1021	PGSC0003DMG400011959	PGSC0003DMT400031215	7754	Mannitol transporter	0.955666	5.78424e-05
StLNC1854	PGSC0003DMG400028001	PGSC0003DMT400071965	7749	Cc-nbs-lrr resistance protein	0.95534	5.93276e-05
StLNC0823	PGSC0003DMG400035134	PGSC0003DMT400085563	7705	Storekeeper protein	0.953837	6.65146e-05
StLNC0092	PGSC0003DMG400039179	PGSC0003DMT400089608	7700	Conserved gene of unknown function	0.953719	6.71054e-05
StLNC2309	PGSC0003DMG400035134	PGSC0003DMT400085563	7692	Storekeeper protein	0.952742	7.21238e-05
StLNC1959	PGSC0003DMG400022092	PGSC0003DMT400056808	7686	Gene of unknown function	0.95127	8.01821e-05
StLNC2409	PGSC0003DMG400028001	PGSC0003DMT400071965	7671	Cc-nbs-lrr resistance protein	0.950804	8.28592e-05
StLNC2805	PGSC0003DMG400035134	PGSC0003DMT400085563	7658	Storekeeper protein	0.950688	8.35358e-05
StLNC1450	PGSC0003DMG400028856	PGSC0003DMT400074261	7655	Erect panical 2	0.97263	1.08735e-05
StLNC0281	PGSC0003DMG400007797	PGSC0003DMT400020128	7583	Citrate synthase	0.97092	1.34207e-05
StLNC0441	PGSC0003DMG400026613	PGSC0003DMT400068437	7559	Cytochrome P450 71 family protein	0.970358	1.43435e-05
StLNC1839	PGSC0003DMG400012910	PGSC0003DMT400033620	7550	Glucose-6-phosphate isomerase	0.967919	1.88707e-05
StLNC1986	PGSC0003DMG400020376	PGSC0003DMT400052512	7550	Gene of unknown function	0.965895	2.33301e-05
StLNC0997	PGSC0003DMG400035134	PGSC0003DMT400085563	7549	Storekeeper protein	0.958865	4.46439e-05
StLNC1473	PGSC0003DMG400022520	PGSC0003DMT400058008	7540	Gene of unknown function	0.958476	4.61237e-05
StLNC0902	PGSC0003DMG400025492	PGSC0003DMT400065518	7525	Peroxidase	0.957407	5.03632e-05
StLNC0920	PGSC0003DMG400046262	PGSC0003DMT400096691	7522	Conserved gene of unknown function	0.956229	5.53424e-05
StLNC1234	PGSC0003DMG400043072	PGSC0003DMT400093501	7502	ZF-HD homeobox protein	0.955041	6.07079e-05
StLNC2607	PGSC0003DMG400045567	PGSC0003DMT400095996	7496	Gene of unknown function	0.953449	6.84626e-05
StLNC0706	PGSC0003DMG400006794	PGSC0003DMT400017493	7491	PHD finger family protein	0.953339	6.90241e-05
StLNC1733	PGSC0003DMG400039609	PGSC0003DMT400090038	7488	NB-ARC domain containing protein	0.969671	1.55293e-05
StLNC2543	PGSC0003DMG400006025	PGSC0003DMT400015435	7470	1-aminocyclopropane-1-carboxylic acid oxidase	0.966844	2.11563e-05
StLNC2838	PGSC0003DMG400044929	PGSC0003DMT400095358	7459	Anthocyanin acyltransferase	0.959825	4.11417e-05
StLNC2248	PGSC0003DMG401016399	PGSC0003DMT400042251	7455	Conserved gene of unknown function	0.955912	5.67428e-05
StLNC0937	PGSC0003DMG401016399	PGSC0003DMT400042251	7455	Conserved gene of unknown function	0.954024	6.55889e-05
StLNC1623	PGSC0003DMG400016247	PGSC0003DMT400041874	7446	Acyl-[acyl-carrier-protein] desaturase, chloroplastic	0.953932	6.60404e-05
StLNC0288	PGSC0003DMG400001211	PGSC0003DMT400003054	7440	Hydrolase, hydrolyzing O-glycosyl compounds	0.952648	7.26192e-05
StLNC0352	PGSC0003DMG400029684	PGSC0003DMT400076349	7432	Conserved gene of unknown function	0.951606	7.8288e-05
StLNC0265	PGSC0003DMG400047157	PGSC0003DMT400097586	7414	Gene of unknown function	0.950536	8.44264e-05
StLNC2398	PGSC0003DMG400020162	PGSC0003DMT400051950	7405	Protein XRI1	0.979707	3.84256e-06
StLNC0847	PGSC0003DMG400037684	PGSC0003DMT400088113	7401	Double-stranded RNA binding protein	0.979343	4.08784e-06
StLNC2389	PGSC0003DMG400026789	PGSC0003DMT400068885	7380	Gene of unknown function	0.979283	4.12979e-06
StLNC1667	PGSC0003DMG400026789	PGSC0003DMT400068885	7376	Gene of unknown function	0.979032	4.3063e-06
StLNC0269	PGSC0003DMG400006339	PGSC0003DMT400016219	7368	Sodium/potassium/calcium exchanger	0.978826	4.4549e-06
StLNC1114	PGSC0003DMG400010641	PGSC0003DMT400027602	7362	Pheophorbide A oxygenase	0.978147	4.97207e-06
StLNC0259	PGSC0003DMG400027456	PGSC0003DMT400070630	7362	Diacylglycerol kinase 7	0.977391	5.5969e-06
StLNC1847	PGSC0003DMG400020162	PGSC0003DMT400051950	7355	Protein XRI1	0.977243	5.72485e-06
StLNC2608	PGSC0003DMG400011111	PGSC0003DMT400028871	7350	Cc-nbs-lrr resistance protein	0.97719	5.77143e-06
StLNC2333	PGSC0003DMG400011959	PGSC0003DMT400031215	7316	Mannitol transporter	0.976434	6.46435e-06
StLNC1140	PGSC0003DMG400011959	PGSC0003DMT400031215	7312	Mannitol transporter	0.975561	7.33593e-06
StLNC0912	PGSC0003DMG400011959	PGSC0003DMT400031215	7311	Mannitol transporter	0.97528	7.63342e-06
StLNC2289	PGSC0003DMG400003477	PGSC0003DMT400008929	7307	Nodulin	0.975061	7.87144e-06
StLNC0381	PGSC0003DMG400026789	PGSC0003DMT400068885	7307	Gene of unknown function	0.974915	8.03191e-06
StLNC2089	PGSC0003DMG401023974	PGSC0003DMT400061585	7304	Amino acid binding protein	0.974368	8.65732e-06
StLNC1192	PGSC0003DMG400011959	PGSC0003DMT400031215	7298	Mannitol transporter	0.974161	8.90283e-06
StLNC1866	PGSC0003DMG400011959	PGSC0003DMT400031215	7297	Mannitol transporter	0.97388	9.2446e-06
StLNC0600	PGSC0003DMG400026613	PGSC0003DMT400068437	7279	Cytochrome P450 71 family protein	0.973775	9.37411e-06
StLNC2601	PGSC0003DMG400005741	PGSC0003DMT400014727	7268	Protein phosphatase 2C 8	0.973089	1.02533e-05
StLNC2598	PGSC0003DMG400025492	PGSC0003DMT400065518	7255	Peroxidase	0.972048	1.1698e-05
StLNC1668	PGSC0003DMG400040173	PGSC0003DMT400090602	7230	Gene of unknown function	0.972013	1.17494e-05
StLNC2852	PGSC0003DMG400008546	PGSC0003DMT400022042	7216	Miraculin	0.971948	1.1844e-05
StLNC0319	PGSC0003DMG400035816	PGSC0003DMT400086245	7179	Kinase	0.971911	1.18986e-05
StLNC1760	PGSC0003DMG400004664	PGSC0003DMT400011875	7177	Gene of unknown function	0.971906	1.19053e-05
StLNC1221	PGSC0003DMG400044583	PGSC0003DMT400095012	7156	Gene of unknown function	0.97124	1.29151e-05
StLNC1133	PGSC0003DMG400004593	PGSC0003DMT400011693	7155	Chitinase	0.970801	1.36125e-05
StLNC0813	PGSC0003DMG400044583	PGSC0003DMT400095012	7149	Gene of unknown function	0.970422	1.4236e-05
StLNC1641	PGSC0003DMG400028867	PGSC0003DMT400074277	7144	Reverse transcriptase	0.970421	1.42368e-05
StLNC2553	PGSC0003DMG400030289	PGSC0003DMT400077861	7122	Integrase	0.970402	1.42697e-05
StLNC2042	PGSC0003DMG400046721	PGSC0003DMT400097150	7110	Gag-pol polyprotein	0.970318	1.44107e-05
StLNC0011	PGSC0003DMG400039811	PGSC0003DMT400090240	7108	Conserved gene of unknown function	0.969865	1.51879e-05
StLNC1890	PGSC0003DMG400025028	PGSC0003DMT400064422	7107	Myosin VIII-2	0.969764	1.53658e-05
StLNC2280	PGSC0003DMG400001035	PGSC0003DMT400002684	7101	Serine hydroxymethyltransferase	0.969335	1.61352e-05
StLNC1003	PGSC0003DMG400018774	PGSC0003DMT400048315	7101	Cell division protease ftsH	0.969241	1.63073e-05
StLNC0986	PGSC0003DMG400026573	PGSC0003DMT400068337	7097	Resistance protein PSH-RGH6	0.968626	1.74661e-05
StLNC2802	PGSC0003DMG400034883	PGSC0003DMT400085312	7076	Gene of unknown function	0.968318	1.80696e-05
StLNC2656	PGSC0003DMG400039930	PGSC0003DMT400090359	7036	Gene of unknown function	0.968153	1.8398e-05
StLNC2657	PGSC0003DMG400040113	PGSC0003DMT400090542	7033	Gene of unknown function	0.967817	1.90785e-05
StLNC1144	PGSC0003DMG400014452	PGSC0003DMT400037454	6993	Auxin response factor 2	0.9674	1.99504e-05
StLNC0275	PGSC0003DMG402000299	PGSC0003DMT400000808	6991	Serine-threonine protein kinase, plant-type	0.967217	2.0341e-05
StLNC2491	PGSC0003DMG400042574	PGSC0003DMT400093003	6959	Conserved gene of unknown function	0.966857	2.11273e-05
StLNC1094	PGSC0003DMG400038931	PGSC0003DMT400089360	6956	Conserved gene of unknown function	0.966757	2.13477e-05
StLNC1256	PGSC0003DMG400006871	PGSC0003DMT400017716	6952	Conserved gene of unknown function	0.966565	2.17786e-05
StLNC2750	PGSC0003DMG402011794	PGSC0003DMT400030789	6940	ATP binding protein	0.965903	2.33103e-05
StLNC1937	PGSC0003DMG400028268	PGSC0003DMT400072645	6940	Cytochrome P450 76A2	0.96584	2.34613e-05
StLNC1373	PGSC0003DMG400023036	PGSC0003DMT400059287	6935	Gene of unknown function	0.965796	2.35665e-05
StLNC0704	PGSC0003DMG400016975	PGSC0003DMT400043706	6930	RNase H family protein	0.965452	2.4398e-05
StLNC0955	PGSC0003DMG400028566	PGSC0003DMT400073535	6916	Indole-3-glycerol phosphate lyase IGL1	0.965115	2.52315e-05
StLNC1864	PGSC0003DMG400030593	PGSC0003DMT400078609	6916	Proteinase inhibitor IIa	0.964747	2.61669e-05
StLNC2247	PGSC0003DMG400018886	PGSC0003DMT400048612	6915	Zinc finger protein	0.964636	2.64533e-05
StLNC0246	PGSC0003DMG400033892	PGSC0003DMT400084243	6892	Cysteine-type peptidase	0.963277	3.01451e-05
StLNC1150	PGSC0003DMG400009984	PGSC0003DMT400025858	6856	Hedgehog receptor	0.963196	3.03745e-05
StLNC2243	PGSC0003DMG400015903	PGSC0003DMT400041089	6854	Armadillo/beta-catenin repeat family protein	0.963048	3.08017e-05
StLNC2530	PGSC0003DMG400003243	PGSC0003DMT400008404	6851	Gene of unknown function	0.962907	3.12102e-05
StLNC0371	PGSC0003DMG400003243	PGSC0003DMT400008404	6847	Gene of unknown function	0.962777	3.15917e-05
StLNC2006	PGSC0003DMG400019667	PGSC0003DMT400050619	6845	Potato resistance I2GA-SH23-3	0.961627	3.51013e-05
StLNC1040	PGSC0003DMG400018886	PGSC0003DMT400048612	6844	Zinc finger protein	0.961411	3.57901e-05
StLNC0970	PGSC0003DMG400028451	PGSC0003DMT400073221	6840	ATP binding protein	0.961051	3.69583e-05
StLNC2148	PGSC0003DMG400002680	PGSC0003DMT400006908	6832	Heat shock protein binding protein	0.960297	3.94953e-05
StLNC0643	PGSC0003DMG400010678	PGSC0003DMT400027709	6803	Conserved gene of unknown function	0.960235	3.97092e-05
StLNC2335	PGSC0003DMG400040097	PGSC0003DMT400090526	6774	SP9D	0.960076	4.02604e-05
StLNC1814	PGSC0003DMG400046162	PGSC0003DMT400096591	6757	NB-ARC domain containing protein	0.959936	4.07502e-05
StLNC1762	PGSC0003DMG400046121	PGSC0003DMT400096550	6744	Conserved gene of unknown function	0.959839	4.10942e-05
StLNC1197	PGSC0003DMG400037779	PGSC0003DMT400088208	6734	Gene of unknown function	0.958918	4.44487e-05
StLNC0918	PGSC0003DMG400001211	PGSC0003DMT400003054	6733	Hydrolase, hydrolyzing O-glycosyl compounds	0.957695	4.91952e-05
StLNC0981	PGSC0003DMG400030289	PGSC0003DMT400077861	6726	Integrase	0.957456	5.01617e-05
StLNC0794	PGSC0003DMG400018286	PGSC0003DMT400047124	6725	Vetispiradiene synthase	0.957014	5.19854e-05
StLNC0304	PGSC0003DMG400047231	PGSC0003DMT400097660	6710	Conserved gene of unknown function	0.955996	5.6366e-05
StLNC1528	PGSC0003DMG400030289	PGSC0003DMT400077861	6705	Integrase	0.953876	6.63188e-05
StLNC0698	PGSC0003DMG400003309	PGSC0003DMT400008558	6696	MFP1 attachment factor 1	0.953417	6.86263e-05
StLNC0380	PGSC0003DMG400047231	PGSC0003DMT400097660	6677	Conserved gene of unknown function	0.953056	7.04823e-05
StLNC1393	PGSC0003DMG400028360	PGSC0003DMT400072893	6674	CRABS CLAW	0.952004	7.60861e-05
StLNC0778	PGSC0003DMG400028697	PGSC0003DMT400073850	6661	Reverse transcriptase	0.951946	7.64047e-05
StLNC1190	PGSC0003DMG400010641	PGSC0003DMT400027602	6657	Pheophorbide A oxygenase	0.950523	8.45034e-05
StLNC2158	PGSC0003DMG400035552	PGSC0003DMT400085981	6657	Gene of unknown function	0.950317	8.57254e-05
StLNC1933	PGSC0003DMG400031807	PGSC0003DMT400081366	6637	Gene of unknown function	0.973367	9.89061e-06
StLNC2132	PGSC0003DMG400003366	PGSC0003DMT400008683	6620	Gene of unknown function	0.972817	1.06186e-05
StLNC0081	PGSC0003DMG400006131	PGSC0003DMT400015693	6612	RNA binding protein	0.964064	2.79662e-05
StLNC1300	PGSC0003DMG400026506	PGSC0003DMT400068155	6611	Metal tolerance protein	0.960091	4.02079e-05
StLNC0384	PGSC0003DMG400036104	PGSC0003DMT400086533	6609	S-locus lectin protein kinase family protein	0.95935	4.28501e-05
StLNC2303	PGSC0003DMG400023259	PGSC0003DMT400059810	6602	Cleavage stimulation factor 50 kDa subunit	0.953526	6.8074e-05
StLNC0258	PGSC0003DMG400042188	PGSC0003DMT400092617	6595	Monooxygenase	0.9795	3.98088e-06
StLNC1903	PGSC0003DMG400042188	PGSC0003DMT400092617	6595	Monooxygenase	0.979447	4.01682e-06
StLNC0541	PGSC0003DMG400010678	PGSC0003DMT400027709	6594	Conserved gene of unknown function	0.978962	4.35652e-06
StLNC0349	PGSC0003DMG400039179	PGSC0003DMT400089608	6591	Conserved gene of unknown function	0.978185	4.94243e-06
StLNC1554	PGSC0003DMG400004593	PGSC0003DMT400011693	6579	Chitinase	0.977332	5.64735e-06
StLNC1958	PGSC0003DMG400027315	PGSC0003DMT400070250	6574	Seed maturation protein PM36	0.976998	5.94201e-06
StLNC1676	PGSC0003DMG400000575	PGSC0003DMT400001555	6574	DNA mismatch repair muts family protein	0.976919	6.01382e-06
StLNC1969	PGSC0003DMG400004593	PGSC0003DMT400011693	6571	Chitinase	0.975669	7.22379e-06
StLNC0515	PGSC0003DMG400004593	PGSC0003DMT400011693	6571	Chitinase	0.975581	7.31544e-06
StLNC2486	PGSC0003DMG400004593	PGSC0003DMT400011693	6569	Chitinase	0.974223	8.82916e-06
StLNC0661	PGSC0003DMG400041598	PGSC0003DMT400092027	6565	Gene of unknown function	0.972192	1.14899e-05
StLNC2837	PGSC0003DMG400000575	PGSC0003DMT400001555	6546	DNA mismatch repair muts family protein	0.971305	1.28143e-05
StLNC0614	PGSC0003DMG400006516	PGSC0003DMT400016672	6546	L-ascorbate oxidase homolog	0.971191	1.2991e-05
StLNC2350	PGSC0003DMG400012977	PGSC0003DMT400033777	6530	VQ motif-containing protein	0.97048	1.41387e-05
StLNC2821	PGSC0003DMG400012977	PGSC0003DMT400033777	6530	VQ motif-containing protein	0.970322	1.44034e-05
StLNC1108	PGSC0003DMG400022861	PGSC0003DMT400058836	6505	Vacuolar protein sorting-associated protein	0.970256	1.45153e-05
StLNC2566	PGSC0003DMG400030005	PGSC0003DMT400077160	6503	Poly(A) polymerase	0.970015	1.49273e-05
StLNC2568	PGSC0003DMG400025320	PGSC0003DMT400065149	6488	Conserved gene of unknown function	0.969637	1.55899e-05
StLNC2060	PGSC0003DMG400021676	PGSC0003DMT400055809	6470	Indole-3-acetic acid-amido synthetase GH3.5	0.969616	1.56269e-05
StLNC0842	PGSC0003DMG400044276	PGSC0003DMT400094705	6468	RRNA intron-encoded homing endonuclease	0.969296	1.62067e-05
StLNC2629	PGSC0003DMG400044276	PGSC0003DMT400094705	6468	RRNA intron-encoded homing endonuclease	0.969139	1.64948e-05
StLNC2411	PGSC0003DMG400029256	PGSC0003DMT400075209	6461	Anthocyanin acyltransferase	0.968408	1.78918e-05
StLNC2313	PGSC0003DMG400002356	PGSC0003DMT400006063	6440	PT5	0.967943	1.88219e-05
StLNC2573	PGSC0003DMG402018748	PGSC0003DMT400048258	6424	Reverse transcriptase	0.967537	1.96621e-05
StLNC1298	PGSC0003DMG402018748	PGSC0003DMT400048258	6424	Reverse transcriptase	0.967406	1.99383e-05
StLNC1423	PGSC0003DMG400035822	PGSC0003DMT400086251	6421	Gene of unknown function	0.967094	2.06066e-05
StLNC0267	PGSC0003DMG400035822	PGSC0003DMT400086251	6421	Gene of unknown function	0.966936	2.09522e-05
StLNC1897	PGSC0003DMG400035822	PGSC0003DMT400086251	6421	Gene of unknown function	0.966337	2.22992e-05
StLNC1198	PGSC0003DMG400035822	PGSC0003DMT400086251	6416	Gene of unknown function	0.966133	2.27697e-05
StLNC0929	PGSC0003DMG400047320	PGSC0003DMT400097749	6399	Gene of unknown function	0.965042	2.5415e-05
StLNC2806	PGSC0003DMG400022067	PGSC0003DMT400056738	6377	Verticillium wilt resistance	0.96378	2.87371e-05
StLNC1887	PGSC0003DMG400037762	PGSC0003DMT400088191	6377	Gag-pol polyprotein	0.963766	2.87768e-05
StLNC0562	PGSC0003DMG400003627	PGSC0003DMT400009331	6370	Gene of unknown function	0.963612	2.92027e-05
StLNC2228	PGSC0003DMG400021749	PGSC0003DMT400055991	6367	Gene of unknown function	0.962956	3.10681e-05
StLNC2701	PGSC0003DMG400044422	PGSC0003DMT400094851	6366	Gene of unknown function	0.962692	3.18417e-05
StLNC0877	PGSC0003DMG400021749	PGSC0003DMT400055991	6343	Gene of unknown function	0.962319	3.2958e-05
StLNC0469	PGSC0003DMG400021749	PGSC0003DMT400055991	6343	Gene of unknown function	0.961761	3.4678e-05
StLNC2735	PGSC0003DMG400021749	PGSC0003DMT400055991	6339	Gene of unknown function	0.960634	3.83478e-05
StLNC2431	PGSC0003DMG400003020	PGSC0003DMT400007810	6333	Disease resistance protein R3a	0.9603	3.94836e-05
StLNC1537	PGSC0003DMG400015106	PGSC0003DMT400039065	6327	Cell wall peroxidase	0.960064	4.03035e-05
StLNC1338	PGSC0003DMG400025322	PGSC0003DMT400065151	6321	Conserved gene of unknown function	0.959876	4.09616e-05
StLNC2324	PGSC0003DMG400001009	PGSC0003DMT400002628	6320	Gene of unknown function	0.959415	4.26128e-05
StLNC1970	PGSC0003DMG400006719	PGSC0003DMT400017240	6314	Gene of unknown function	0.959162	4.35388e-05
StLNC1122	PGSC0003DMG400006719	PGSC0003DMT400017240	6314	Gene of unknown function	0.958983	4.42054e-05
StLNC1834	PGSC0003DMG400044422	PGSC0003DMT400094851	6298	Gene of unknown function	0.958845	4.47217e-05
StLNC1669	PGSC0003DMG400044583	PGSC0003DMT400095012	6271	Gene of unknown function	0.95816	4.73479e-05
StLNC0522	PGSC0003DMG400012569	PGSC0003DMT400032735	6266	Ring finger protein	0.957795	4.8793e-05
StLNC1419	PGSC0003DMG400000679	PGSC0003DMT400001814	6251	Meprin and TRAF homology domain-containing protein / MATH domain-containing protein	0.956792	5.29215e-05
StLNC0435	PGSC0003DMG400006612	PGSC0003DMT400016907	6225	Gene of unknown function	0.956426	5.44876e-05
StLNC2063	PGSC0003DMG400025052	PGSC0003DMT400064476	6219	ATP synthase 24 kDa subunit, mitochondrial	0.955992	5.63842e-05
StLNC2062	PGSC0003DMG400034790	PGSC0003DMT400085219	6206	P69B protein	0.955816	5.71679e-05
StLNC1597	PGSC0003DMG400003477	PGSC0003DMT400008929	6200	Nodulin	0.955402	5.9043e-05
StLNC1000	PGSC0003DMG400019667	PGSC0003DMT400050619	6194	Potato resistance I2GA-SH23-3	0.955312	5.9456e-05
StLNC1627	PGSC0003DMG400033892	PGSC0003DMT400084243	6158	Cysteine-type peptidase	0.954998	6.09103e-05
StLNC0400	PGSC0003DMG400038772	PGSC0003DMT400089201	6148	Mitochondrial-processing peptidase subunit beta, mitochondrial	0.954924	6.12573e-05
StLNC0639	PGSC0003DMG400032169	PGSC0003DMT400081953	6139	Oxoglutarate malate translocator	0.954493	6.33062e-05
StLNC1486	PGSC0003DMG400039218	PGSC0003DMT400089647	6132	Zinc knuckle family protein	0.954271	6.43778e-05
StLNC0907	PGSC0003DMG400026195	PGSC0003DMT400067383	6127	Storekeeper protein	0.95378	6.67978e-05
StLNC2610	PGSC0003DMG400001553	PGSC0003DMT400003948	6115	DNA mismatch repair protein	0.952926	7.11594e-05
StLNC0161	PGSC0003DMG400022869	PGSC0003DMT400058866	6109	Membrane protein	0.95287	7.14504e-05
StLNC0894	PGSC0003DMG400019667	PGSC0003DMT400050619	6105	Potato resistance I2GA-SH23-3	0.952736	7.21562e-05
StLNC0253	PGSC0003DMG400039720	PGSC0003DMT400090149	6094	Protein phosphatase 2c	0.952353	7.41967e-05
StLNC2754	PGSC0003DMG400038734	PGSC0003DMT400089163	6088	SFBBbeta protein	0.951609	7.82684e-05
StLNC0140	PGSC0003DMG400022869	PGSC0003DMT400058866	6085	Membrane protein	0.973408	9.83705e-06
StLNC0883	PGSC0003DMG402028242	PGSC0003DMT400072577	6070	Retinoblastoma-binding protein	0.971682	1.2239e-05
StLNC1467	PGSC0003DMG400010215	PGSC0003DMT400026464	6070	Cysteine protease	0.954963	6.10731e-05
StLNC1258	PGSC0003DMG400012099	PGSC0003DMT400031540	6050	WD domain containing protein	0.963262	3.0187e-05
StLNC1683	PGSC0003DMG400012099	PGSC0003DMT400031540	6050	WD domain containing protein	0.956395	5.4619e-05
StLNC0168	PGSC0003DMG400032169	PGSC0003DMT400081953	6046	Oxoglutarate malate translocator	0.953498	6.82167e-05
StLNC0536	PGSC0003DMG400026721	PGSC0003DMT400068723	6040	Conserved gene of unknown function	0.976235	6.65692e-06
StLNC0852	PGSC0003DMG400017870	PGSC0003DMT400046054	6037	Auxin:hydrogen symporter	0.971056	1.32042e-05
StLNC2635	PGSC0003DMG400017870	PGSC0003DMT400046054	6037	Auxin:hydrogen symporter	0.965734	2.37134e-05
StLNC2593	PGSC0003DMG400017870	PGSC0003DMT400046054	6037	Auxin:hydrogen symporter	0.957766	4.89075e-05
StLNC2116	PGSC0003DMG400017870	PGSC0003DMT400046054	6036	Auxin:hydrogen symporter	0.957532	4.98539e-05
StLNC1166	PGSC0003DMG400029187	PGSC0003DMT400075040	6034	EMB3013	0.953923	6.60865e-05
StLNC2504	PGSC0003DMG400038772	PGSC0003DMT400089201	6034	Mitochondrial-processing peptidase subunit beta, mitochondrial	0.953267	6.93938e-05
StLNC2729	PGSC0003DMG400043045	PGSC0003DMT400093474	5994	AtRLP45 (Receptor 45)	0.951745	7.75147e-05
StLNC1944	PGSC0003DMG400040032	PGSC0003DMT400090461	5958	Gene of unknown function	0.950023	8.74879e-05
StLNC1888	PGSC0003DMG400037504	PGSC0003DMT400087933	5941	Conserved gene of unknown function	0.969145	1.64836e-05
StLNC1081	PGSC0003DMG400035585	PGSC0003DMT400086014	5933	Integrase core domain containing protein	0.961885	3.42901e-05
StLNC2028	PGSC0003DMG400021620	PGSC0003DMT400055680	5930	ATP synthase subunit H protein	0.959859	4.10218e-05
StLNC1413	PGSC0003DMG400000591	PGSC0003DMT400001592	5908	Gene of unknown function	0.957362	5.05439e-05
StLNC2179	PGSC0003DMG400010210	PGSC0003DMT400026452	5904	Conserved gene of unknown function	0.954634	6.26296e-05
StLNC1438	PGSC0003DMG400043045	PGSC0003DMT400093474	5898	AtRLP45 (Receptor 45)	0.953939	6.60096e-05
StLNC2151	PGSC0003DMG400043045	PGSC0003DMT400093474	5898	AtRLP45 (Receptor 45)	0.95347	6.83561e-05
StLNC0209	PGSC0003DMG400011126	PGSC0003DMT400028909	5869	Gene of unknown function	0.969343	1.61204e-05
StLNC2510	PGSC0003DMG400011126	PGSC0003DMT400028909	5869	Gene of unknown function	0.963252	3.0215e-05
StLNC0668	PGSC0003DMG400014385	PGSC0003DMT400037284	5868	Cell differentiation protein rcd1	0.961476	3.55817e-05
StLNC0348	PGSC0003DMG400026463	PGSC0003DMT400068047	5864	Aquaporin TIP2	0.95974	4.14467e-05
StLNC1390	PGSC0003DMG400005209	PGSC0003DMT400013356	5846	Pg4	0.978092	5.0159e-06
StLNC0962	PGSC0003DMG400022520	PGSC0003DMT400058008	5838	Gene of unknown function	0.972842	1.05839e-05
StLNC1978	PGSC0003DMG400003085	PGSC0003DMT400007978	5822	NLI interacting factor (NIF) family protein	0.971324	1.27839e-05
StLNC1513	PGSC0003DMG400011126	PGSC0003DMT400028909	5807	Gene of unknown function	0.967534	1.96673e-05
StLNC2018	PGSC0003DMG400005909	PGSC0003DMT400015111	5803	Regulator of gene silencing	0.96237	3.28031e-05
StLNC2157	PGSC0003DMG400017820	PGSC0003DMT400045944	5802	Gag-pol polyprotein	0.962137	3.3512e-05
StLNC1596	PGSC0003DMG400003627	PGSC0003DMT400009331	5793	Gene of unknown function	0.960871	3.7553e-05
StLNC1481	PGSC0003DMG400003627	PGSC0003DMT400009331	5787	Gene of unknown function	0.958398	4.64238e-05
StLNC1788	PGSC0003DMG400044405	PGSC0003DMT400094834	5776	Gene of unknown function	0.957797	4.87848e-05
StLNC0211	PGSC0003DMG400001237	PGSC0003DMT400003108	5772	Small GTP-binding protein	0.955531	5.84549e-05
StLNC0215	PGSC0003DMG400038408	PGSC0003DMT400088837	5768	Chromatin remodeling complex subunit	0.954416	6.36749e-05
StLNC2163	PGSC0003DMG401018810	PGSC0003DMT400048422	5765	Pentatricopeptide repeat-containing protein	0.954151	6.49658e-05
StLNC1431	PGSC0003DMG400003627	PGSC0003DMT400009331	5765	Gene of unknown function	0.952611	7.2816e-05
StLNC1474	PGSC0003DMG400011978	PGSC0003DMT400031254	5757	Conserved gene of unknown function	0.9521	7.55652e-05
StLNC2420	PGSC0003DMG400020578	PGSC0003DMT400053021	5746	Apyrase	0.967401	1.99482e-05
StLNC0630	PGSC0003DMG400015102	PGSC0003DMT400039056	5743	Retrotransposon protein	0.967335	2.0088e-05
StLNC2826	PGSC0003DMG400022520	PGSC0003DMT400058008	5729	Gene of unknown function	0.963012	3.0904e-05
StLNC0887	PGSC0003DMG400037504	PGSC0003DMT400087933	5728	Conserved gene of unknown function	0.95988	4.0947e-05
StLNC2262	PGSC0003DMG400012825	PGSC0003DMT400033382	5723	DOF zinc finger protein	0.957307	5.07707e-05
StLNC2294	PGSC0003DMG400029822	PGSC0003DMT400076678	5709	Replication factor A	0.956851	5.26729e-05
StLNC1694	PGSC0003DMG400044726	PGSC0003DMT400095155	5699	Gene of unknown function	0.95182	7.71004e-05
StLNC0682	PGSC0003DMG400012665	PGSC0003DMT400032972	5692	Conserved gene of unknown function	0.97817	4.9538e-06
StLNC1624	PGSC0003DMG400017307	PGSC0003DMT400044590	5674	ATFP4	0.974019	9.07432e-06
StLNC2739	PGSC0003DMG400045494	PGSC0003DMT400095923	5663	O-methyltransferase	0.972057	1.16857e-05
StLNC0268	PGSC0003DMG400012569	PGSC0003DMT400032735	5651	Ring finger protein	0.968122	1.84586e-05
StLNC1156	PGSC0003DMG400011978	PGSC0003DMT400031254	5646	Conserved gene of unknown function	0.967293	2.01791e-05
StLNC0628	PGSC0003DMG400011978	PGSC0003DMT400031254	5646	Conserved gene of unknown function	0.965337	2.46798e-05
StLNC1942	PGSC0003DMG400039179	PGSC0003DMT400089608	5565	Conserved gene of unknown function	0.964348	2.72073e-05
StLNC0606	PGSC0003DMG400038942	PGSC0003DMT400089371	5562	Gene of unknown function	0.964266	2.74233e-05
StLNC2129	PGSC0003DMG400035253	PGSC0003DMT400085682	5560	Gene of unknown function	0.96378	2.87373e-05
StLNC0454	PGSC0003DMG400039122	PGSC0003DMT400089551	5522	Two-component response regulator ARR22	0.958734	4.51381e-05
StLNC2560	PGSC0003DMG400038772	PGSC0003DMT400089201	5520	Mitochondrial-processing peptidase subunit beta, mitochondrial	0.958288	4.68501e-05
StLNC1810	PGSC0003DMG400038772	PGSC0003DMT400089201	5508	Mitochondrial-processing peptidase subunit beta, mitochondrial	0.958275	4.68994e-05
StLNC1379	PGSC0003DMG400036483	PGSC0003DMT400086912	5505	Gene of unknown function	0.958112	4.75377e-05
StLNC0127	PGSC0003DMG400038772	PGSC0003DMT400089201	5501	Mitochondrial-processing peptidase subunit beta, mitochondrial	0.954336	6.40621e-05
StLNC0565	PGSC0003DMG400038772	PGSC0003DMT400089201	5500	Mitochondrial-processing peptidase subunit beta, mitochondrial	0.951937	7.64533e-05
StLNC1781	PGSC0003DMG400012825	PGSC0003DMT400033382	5487	DOF zinc finger protein	0.951401	7.94377e-05
StLNC1590	PGSC0003DMG400013296	PGSC0003DMT400034600	5482	Metal ion binding protein	0.950659	8.37031e-05
StLNC1894	PGSC0003DMG400013296	PGSC0003DMT400034600	5477	Metal ion binding protein	0.950281	8.59376e-05
StLNC0735	PGSC0003DMG400038772	PGSC0003DMT400089201	5464	Mitochondrial-processing peptidase subunit beta, mitochondrial	0.962139	3.35064e-05
StLNC2266	PGSC0003DMG400028451	PGSC0003DMT400073221	5454	ATP binding protein	0.96222	3.32577e-05
StLNC1054	PGSC0003DMG400013351	PGSC0003DMT400034750	5428	HECT	0.961456	3.56449e-05
StLNC1230	PGSC0003DMG401018810	PGSC0003DMT400048422	5415	Pentatricopeptide repeat-containing protein	0.972831	1.05992e-05
StLNC1801	PGSC0003DMG401018810	PGSC0003DMT400048422	5415	Pentatricopeptide repeat-containing protein	0.971826	1.20235e-05
StLNC1670	PGSC0003DMG401018810	PGSC0003DMT400048422	5410	Pentatricopeptide repeat-containing protein	0.966633	2.16256e-05
StLNC0364	PGSC0003DMG400018284	PGSC0003DMT400047089	5401	Vetispiradiene synthase	0.96211	3.3593e-05
StLNC0466	PGSC0003DMG400022438	PGSC0003DMT400057795	5387	Splicing factor U2af large subunit B	0.969178	1.64239e-05
StLNC1568	PGSC0003DMG400036483	PGSC0003DMT400086912	5346	Gene of unknown function	0.967595	1.95391e-05
StLNC0926	PGSC0003DMG400047103	PGSC0003DMT400097532	5344	DNA binding protein	0.965891	2.33401e-05
StLNC0598	PGSC0003DMG400009148	PGSC0003DMT400023636	5333	DNA binding protein	0.965313	2.47389e-05
StLNC2322	PGSC0003DMG400010630	PGSC0003DMT400027579	5284	Salt overly sensitive 1	0.953236	6.95553e-05
StLNC0198	PGSC0003DMG400027519	PGSC0003DMT400070776	5279	Conserved gene of unknown function	0.955709	5.76482e-05
StLNC0054	PGSC0003DMG400018110	PGSC0003DMT400046637	5272	Alliin lyase	0.951137	8.09405e-05
StLNC0908	PGSC0003DMG400032110	PGSC0003DMT400081764	5262	Protein phosphatase 2c	0.964685	2.63252e-05
StLNC0298	PGSC0003DMG400027519	PGSC0003DMT400070776	5260	Conserved gene of unknown function	0.958876	4.46029e-05
StLNC0490	PGSC0003DMG400032110	PGSC0003DMT400081764	5259	Protein phosphatase 2c	0.95746	5.01449e-05
StLNC0890	PGSC0003DMG403005911	PGSC0003DMT400015122	5256	40S ribosomal protein S11	0.979757	3.81022e-06
StLNC1899	PGSC0003DMG400045503	PGSC0003DMT400095932	5248	Gene of unknown function	0.979637	3.88932e-06
StLNC0467	PGSC0003DMG400036069	PGSC0003DMT400086498	5239	Gene of unknown function	0.979381	4.06175e-06
StLNC2787	PGSC0003DMG400030989	PGSC0003DMT400079584	5237	Sentrin/sumo-specific protease	0.979292	4.12324e-06
StLNC1961	PGSC0003DMG400013351	PGSC0003DMT400034750	5229	HECT	0.979262	4.1444e-06
StLNC0489	PGSC0003DMG400023781	PGSC0003DMT400061125	5209	GATA zinc finger containing protein	0.979127	4.23909e-06
StLNC1194	PGSC0003DMG400012261	PGSC0003DMT400031965	5206	Auxin response factor 9	0.977924	5.15134e-06
StLNC1448	PGSC0003DMG400012261	PGSC0003DMT400031965	5159	Auxin response factor 9	0.977253	5.71689e-06
StLNC1372	PGSC0003DMG400045844	PGSC0003DMT400096273	5146	Gene of unknown function	0.977185	5.77602e-06
StLNC1033	PGSC0003DMG400028591	PGSC0003DMT400073599	5133	Conserved gene of unknown function	0.976856	6.0711e-06
StLNC1910	PGSC0003DMG400039179	PGSC0003DMT400089608	5131	Conserved gene of unknown function	0.976535	6.36881e-06
StLNC2152	PGSC0003DMG400007867	PGSC0003DMT400020342	5131	Disease resistance protein Gpa2	0.976393	6.50399e-06
StLNC2192	PGSC0003DMG402011958	PGSC0003DMT400031214	5128	Binding protein	0.975896	6.99201e-06
StLNC2376	PGSC0003DMG400020293	PGSC0003DMT400052293	5126	Gene of unknown function	0.975365	7.54265e-06
StLNC0084	PGSC0003DMG400037875	PGSC0003DMT400088304	5121	Gene of unknown function	0.975354	7.55393e-06
StLNC0560	PGSC0003DMG400026142	PGSC0003DMT400067225	5118	Vesicle-associated membrane protein	0.973616	9.57308e-06
StLNC2296	PGSC0003DMG400025406	PGSC0003DMT400065363	5116	Conserved gene of unknown function	0.973103	1.02344e-05
StLNC1811	PGSC0003DMG401018748	PGSC0003DMT400048256	5099	Gene of unknown function	0.972896	1.05116e-05
StLNC2698	PGSC0003DMG400011700	PGSC0003DMT400030549	5099	Conserved gene of unknown function	0.972558	1.09742e-05
StLNC1610	PGSC0003DMG400039179	PGSC0003DMT400089608	5098	Conserved gene of unknown function	0.972238	1.14249e-05
StLNC2447	PGSC0003DMG400034995	PGSC0003DMT400085424	5079	Conserved gene of unknown function	0.971965	1.182e-05
StLNC1195	PGSC0003DMG400026941	PGSC0003DMT400069260	5075	Zinc finger protein	0.971592	1.23746e-05
StLNC0791	PGSC0003DMG402015901	PGSC0003DMT400041086	5061	Stromal antigen	0.971388	1.26863e-05
StLNC0031	PGSC0003DMG400030302	PGSC0003DMT400077905	5061	Polyprotein	0.971265	1.28752e-05
StLNC0708	PGSC0003DMG400032245	PGSC0003DMT400082070	5051	Pentatricopeptide repeat-containing protein	0.971243	1.29103e-05
StLNC2213	PGSC0003DMG400013741	PGSC0003DMT400035727	5047	Conserved gene of unknown function	0.970983	1.33208e-05
StLNC0660	PGSC0003DMG400009239	PGSC0003DMT400023895	5034	Pentatricopeptide repeat-containing protein	0.970793	1.3625e-05
StLNC0039	PGSC0003DMG400035555	PGSC0003DMT400085984	5030	Gene of unknown function	0.970772	1.366e-05
StLNC2175	PGSC0003DMG400025404	PGSC0003DMT400065360	5017	Class S F-box protein	0.970246	1.45309e-05
StLNC1235	PGSC0003DMG400039583	PGSC0003DMT400090012	5012	Conserved gene of unknown function	0.970196	1.4616e-05
StLNC2508	PGSC0003DMG402025733	PGSC0003DMT400066100	5009	Gene of unknown function	0.969837	1.52372e-05
StLNC2242	PGSC0003DMG400024998	PGSC0003DMT400064346	5005	Conserved gene of unknown function	0.969452	1.59219e-05
StLNC1533	PGSC0003DMG401015159	PGSC0003DMT400039204	4999	Eukaryotic translation initiation factor 2c	0.969205	1.63732e-05
StLNC0105	PGSC0003DMG400011700	PGSC0003DMT400030549	4995	Conserved gene of unknown function	0.969073	1.66182e-05
StLNC0432	PGSC0003DMG400022092	PGSC0003DMT400056808	4976	Gene of unknown function	0.967782	1.91513e-05
StLNC0711	PGSC0003DMG400034883	PGSC0003DMT400085312	4970	Gene of unknown function	0.96767	1.93835e-05
StLNC1068	PGSC0003DMG400023041	PGSC0003DMT400059300	4965	Gene of unknown function	0.967119	2.05536e-05
StLNC0476	PGSC0003DMG402012324	PGSC0003DMT400032104	4963	Polygalacturonase	0.964481	2.68558e-05
StLNC1729	PGSC0003DMG400004593	PGSC0003DMT400011693	4930	Chitinase	0.963287	3.01167e-05
StLNC2680	PGSC0003DMG400024278	PGSC0003DMT400062382	4924	Phenylacetaldehyde synthase	0.962951	3.10808e-05
StLNC0122	PGSC0003DMG404030108	PGSC0003DMT400077411	4919	CXE carboxylesterase	0.962461	3.25301e-05
StLNC1437	PGSC0003DMG400030668	PGSC0003DMT400078811	4917	Gene of unknown function	0.962057	3.37567e-05
StLNC0482	PGSC0003DMG400009223	PGSC0003DMT400023842	4897	Conserved gene of unknown function	0.961731	3.47708e-05
StLNC0809	PGSC0003DMG402018748	PGSC0003DMT400048258	4895	Reverse transcriptase	0.960761	3.7919e-05
StLNC1401	PGSC0003DMG400008610	PGSC0003DMT400022189	4870	Histone H3.2	0.960552	3.86222e-05
StLNC1628	PGSC0003DMG400007282	PGSC0003DMT400018787	4862	Conserved gene of unknown function	0.960172	3.99279e-05
StLNC2102	PGSC0003DMG400019667	PGSC0003DMT400050619	4858	Potato resistance I2GA-SH23-3	0.95952	4.22332e-05
StLNC0189	PGSC0003DMG400017557	PGSC0003DMT400045250	4818	AT hook motif family protein	0.958968	4.4262e-05
StLNC2240	PGSC0003DMG400011105	PGSC0003DMT400028839	4811	D-alanine-D-alanine ligase	0.958886	4.45686e-05
StLNC1092	PGSC0003DMG400032133	PGSC0003DMT400081837	4795	Glucan endo-1,3-beta-glucosidase 4	0.958807	4.48653e-05
StLNC0572	PGSC0003DMG400004969	PGSC0003DMT400012749	4772	Integrase	0.958207	4.71647e-05
StLNC0810	PGSC0003DMG400011641	PGSC0003DMT400030403	4771	CBL-interacting protein kinase 13	0.957397	5.04034e-05
StLNC2848	PGSC0003DMG400011641	PGSC0003DMT400030403	4771	CBL-interacting protein kinase 13	0.956446	5.44014e-05
StLNC2594	PGSC0003DMG400000317	PGSC0003DMT400000846	4745	Arabinogalactan peptide 22	0.956035	5.61957e-05
StLNC2527	PGSC0003DMG400021184	PGSC0003DMT400054594	4725	LRR receptor-like serine/threonine-protein kinase	0.955767	5.73872e-05
StLNC0933	PGSC0003DMG400000323	PGSC0003DMT400000859	4720	Conserved gene of unknown function	0.954848	6.16157e-05
StLNC1680	PGSC0003DMG400011334	PGSC0003DMT400029476	4707	Phylloplanin	0.954083	6.52951e-05
StLNC0767	PGSC0003DMG400011334	PGSC0003DMT400029476	4707	Phylloplanin	0.953954	6.59353e-05
StLNC1154	PGSC0003DMG400011334	PGSC0003DMT400029476	4707	Phylloplanin	0.952707	7.23092e-05
StLNC0334	PGSC0003DMG400011334	PGSC0003DMT400029476	4707	Phylloplanin	0.951804	7.71891e-05
StLNC1846	PGSC0003DMG400011334	PGSC0003DMT400029476	4707	Phylloplanin	0.950033	8.7427e-05
StLNC1979	PGSC0003DMG400013603	PGSC0003DMT400035393	4696	UDP-glucosyltransferase	0.951442	7.92084e-05
StLNC1452	PGSC0003DMG400038517	PGSC0003DMT400088946	4694	Conserved gene of unknown function	0.950467	8.48319e-05
StLNC0717	PGSC0003DMG400047043	PGSC0003DMT400097472	4694	Cyclic nucleotide-gated channel beta subunit	0.979919	3.70519e-06
StLNC2590	PGSC0003DMG400022735	PGSC0003DMT400058526	4692	Conserved gene of unknown function	0.979695	3.85051e-06
StLNC1947	PGSC0003DMG400018961	PGSC0003DMT400048787	4692	Beta-amyrin synthase	0.979331	4.09602e-06
StLNC0455	PGSC0003DMG400013119	PGSC0003DMT400034149	4686	Protein AFR	0.979119	4.24429e-06
StLNC0314	PGSC0003DMG400032793	PGSC0003DMT400082752	4685	Heat stress transcription factor HSFA9	0.978674	4.56725e-06
StLNC0831	PGSC0003DMG401005707	PGSC0003DMT400014587	4685	Acireductone dioxygenase	0.97818	4.94659e-06
StLNC1732	PGSC0003DMG400014384	PGSC0003DMT400037283	4677	Conserved gene of unknown function	0.977855	5.20739e-06
StLNC0243	PGSC0003DMG400022871	PGSC0003DMT400058871	4635	Gene of unknown function	0.976697	6.21754e-06
StLNC1396	PGSC0003DMG400002830	PGSC0003DMT400007358	4633	Zinc finger protein	0.97665	6.26125e-06
StLNC1490	PGSC0003DMG400002830	PGSC0003DMT400007358	4632	Zinc finger protein	0.976565	6.34011e-06
StLNC0636	PGSC0003DMG400002830	PGSC0003DMT400007358	4629	Zinc finger protein	0.976351	6.54383e-06
StLNC2223	PGSC0003DMG400023090	PGSC0003DMT400059431	4628	Gene of unknown function	0.97617	6.71954e-06
StLNC1649	PGSC0003DMG400005082	PGSC0003DMT400013037	4620	Beta-glucosidase	0.976068	6.82085e-06
StLNC0599	PGSC0003DMG400036483	PGSC0003DMT400086912	4618	Gene of unknown function	0.975868	7.02116e-06
StLNC1663	PGSC0003DMG400000323	PGSC0003DMT400000859	4614	Conserved gene of unknown function	0.975601	7.29477e-06
StLNC0310	PGSC0003DMG400004829	PGSC0003DMT400012323	4612	Conserved gene of unknown function	0.974993	7.94563e-06
StLNC1630	PGSC0003DMG400036483	PGSC0003DMT400086912	4608	Gene of unknown function	0.974926	8.02053e-06
StLNC2844	PGSC0003DMG400000323	PGSC0003DMT400000859	4600	Conserved gene of unknown function	0.974263	8.78201e-06
StLNC2671	PGSC0003DMG400044024	PGSC0003DMT400094453	4577	Replication protein A1	0.974047	9.04062e-06
StLNC2182	PGSC0003DMG400015595	PGSC0003DMT400040285	4562	LATD/NIP	0.973942	9.16753e-06
StLNC1696	PGSC0003DMG400017476	PGSC0003DMT400045070	4553	Conserved gene of unknown function	0.973782	9.36455e-06
StLNC1088	PGSC0003DMG400030199	PGSC0003DMT400077631	4551	Conserved gene of unknown function	0.972509	1.10415e-05
StLNC1016	PGSC0003DMG400005586	PGSC0003DMT400014246	4546	Gene of unknown function	0.972182	1.1504e-05
StLNC0844	PGSC0003DMG400005586	PGSC0003DMT400014246	4546	Gene of unknown function	0.972004	1.17629e-05
StLNC0566	PGSC0003DMG400033062	PGSC0003DMT400083120	4537	Conserved gene of unknown function	0.971484	1.2538e-05
StLNC1962	PGSC0003DMG400005586	PGSC0003DMT400014246	4531	Gene of unknown function	0.971318	1.27936e-05
StLNC1990	PGSC0003DMG400005586	PGSC0003DMT400014246	4529	Gene of unknown function	0.970122	1.47434e-05
StLNC2187	PGSC0003DMG400043373	PGSC0003DMT400093802	4528	6-phosphogluconate dehydrogenase, decarboxylating	0.970074	1.48249e-05
StLNC0818	PGSC0003DMG400005586	PGSC0003DMT400014246	4527	Gene of unknown function	0.969145	1.64845e-05
StLNC1439	PGSC0003DMG400045752	PGSC0003DMT400096181	4522	Integrase core domain containing protein	0.968647	1.74259e-05
StLNC2236	PGSC0003DMG400013232	PGSC0003DMT400034411	4517	Serine/threonine-protein kinase PBS1	0.968481	1.77492e-05
StLNC0587	PGSC0003DMG400011084	PGSC0003DMT400028794	4513	Gene of unknown function	0.968366	1.79743e-05
StLNC2604	PGSC0003DMG400016890	PGSC0003DMT400043506	4504	LIM domain containing protein	0.967797	1.91203e-05
StLNC2757	PGSC0003DMG400035555	PGSC0003DMT400085984	4490	Gene of unknown function	0.967669	1.93859e-05
StLNC1912	PGSC0003DMG400030593	PGSC0003DMT400078609	4489	Proteinase inhibitor IIa	0.967208	2.03615e-05
StLNC1973	PGSC0003DMG400044024	PGSC0003DMT400094453	4487	Replication protein A1	0.966812	2.12256e-05
StLNC1002	PGSC0003DMG400003469	PGSC0003DMT400008916	4481	Phosphonopyruvate decarboxylase	0.966791	2.12734e-05
StLNC0973	PGSC0003DMG400003444	PGSC0003DMT400008869	4475	Leucine-rich repeat resistance protein	0.965817	2.35158e-05
StLNC2383	PGSC0003DMG400027940	PGSC0003DMT400071814	4455	ATP binding protein	0.964468	2.68907e-05
StLNC0678	PGSC0003DMG402006272	PGSC0003DMT400016046	4443	Gene of unknown function	0.964132	2.77831e-05
StLNC0373	PGSC0003DMG400020114	PGSC0003DMT400051826	4440	Gene of unknown function	0.96265	3.19663e-05
StLNC0817	PGSC0003DMG400017926	PGSC0003DMT400046189	4413	Gene of unknown function	0.962053	3.37704e-05
StLNC1797	PGSC0003DMG400030970	PGSC0003DMT400079538	4406	Conserved gene of unknown function	0.961913	3.42034e-05
StLNC2197	PGSC0003DMG400027265	PGSC0003DMT400070136	4403	Acyl carrier protein	0.961694	3.48887e-05
StLNC0775	PGSC0003DMG400005586	PGSC0003DMT400014246	4403	Gene of unknown function	0.960528	3.87033e-05
StLNC0112	PGSC0003DMG400005586	PGSC0003DMT400014246	4403	Gene of unknown function	0.959809	4.12e-05
StLNC1265	PGSC0003DMG400029898	PGSC0003DMT400076868	4397	Conserved gene of unknown function	0.957607	4.95502e-05
StLNC1817	PGSC0003DMG401011427	PGSC0003DMT400029713	4394	Cc-nbs-lrr resistance protein	0.95751	4.99397e-05
StLNC1089	PGSC0003DMG400025406	PGSC0003DMT400065363	4388	Conserved gene of unknown function	0.95692	5.23809e-05
StLNC2628	PGSC0003DMG400043373	PGSC0003DMT400093802	4387	6-phosphogluconate dehydrogenase, decarboxylating	0.956908	5.24316e-05
StLNC0037	PGSC0003DMG400031535	PGSC0003DMT400080961	4377	Glycine-rich protein A3	0.956532	5.40316e-05
StLNC1642	PGSC0003DMG400021268	PGSC0003DMT400054796	4372	Small glutamine-rich tetratricopeptide repeat-containing protein A	0.956437	5.44375e-05
StLNC0690	PGSC0003DMG400037004	PGSC0003DMT400087433	4358	Conserved gene of unknown function	0.956285	5.50992e-05
StLNC1460	PGSC0003DMG401011220	PGSC0003DMT400029176	4341	Cytosolic purine 5-nucleotidase	0.955872	5.69194e-05
StLNC1036	PGSC0003DMG400037504	PGSC0003DMT400087933	4335	Conserved gene of unknown function	0.95575	5.74628e-05
StLNC0326	PGSC0003DMG400030970	PGSC0003DMT400079538	4319	Conserved gene of unknown function	0.955326	5.93882e-05
StLNC0436	PGSC0003DMG400017219	PGSC0003DMT400044348	4318	Pentatricopeptide repeat-containing protein	0.95517	6.01084e-05
StLNC1185	PGSC0003DMG400004593	PGSC0003DMT400011693	4313	Chitinase	0.955007	6.08689e-05
StLNC2686	PGSC0003DMG400004593	PGSC0003DMT400011693	4313	Chitinase	0.954657	6.25203e-05
StLNC1158	PGSC0003DMG400004593	PGSC0003DMT400011693	4313	Chitinase	0.954595	6.28173e-05
StLNC0893	PGSC0003DMG400004593	PGSC0003DMT400011693	4313	Chitinase	0.954445	6.35338e-05
StLNC1240	PGSC0003DMG400037004	PGSC0003DMT400087433	4310	Conserved gene of unknown function	0.954361	6.39433e-05
StLNC1482	PGSC0003DMG400027653	PGSC0003DMT400071114	4305	Bystin	0.954049	6.54669e-05
StLNC0886	PGSC0003DMG403028564	PGSC0003DMT400073525	4303	Conserved gene of unknown function	0.953661	6.73929e-05
StLNC2778	PGSC0003DMG400026332	PGSC0003DMT400067707	4297	NAC-domain protein	0.953159	6.99483e-05
StLNC0804	PGSC0003DMG400037004	PGSC0003DMT400087433	4292	Conserved gene of unknown function	0.953107	7.02175e-05
StLNC2277	PGSC0003DMG400024863	PGSC0003DMT400063966	4285	Cytochrome P450 hydroxylase	0.952278	7.45986e-05
StLNC2273	PGSC0003DMG400015253	PGSC0003DMT400039449	4267	Glyceraldehyde-3-phosphate dehydrogenase	0.95088	8.24179e-05
StLNC1923	PGSC0003DMG400017187	PGSC0003DMT400044245	4262	Conserved gene of unknown function	0.962694	3.18346e-05
StLNC2003	PGSC0003DMG400004509	PGSC0003DMT400011484	4238	Conserved gene of unknown function	0.955813	5.71805e-05
StLNC2319	PGSC0003DMG400028493	PGSC0003DMT400073320	4229	Gene of unknown function	0.951696	7.77886e-05
StLNC1055	PGSC0003DMG400036874	PGSC0003DMT400087303	4171	Conserved gene of unknown function	0.965246	2.49059e-05
StLNC1430	PGSC0003DMG400002385	PGSC0003DMT400006130	4169	Gene of unknown function	0.965211	2.49925e-05
StLNC0634	PGSC0003DMG400002385	PGSC0003DMT400006130	4161	Gene of unknown function	0.963643	2.91173e-05
StLNC1939	PGSC0003DMG400007093	PGSC0003DMT400018279	4159	Conserved gene of unknown function	0.960607	3.84362e-05
StLNC1578	PGSC0003DMG400001553	PGSC0003DMT400003948	4153	DNA mismatch repair protein	0.957277	5.0897e-05
StLNC1226	PGSC0003DMG403028564	PGSC0003DMT400073525	4145	Conserved gene of unknown function	0.957273	5.09112e-05
StLNC2356	PGSC0003DMG400019284	PGSC0003DMT400049643	4138	Myosin VIII-B	0.956602	5.37316e-05
StLNC2109	PGSC0003DMG400002462	PGSC0003DMT400006305	4132	Beta-glucosidase 18	0.955602	5.81294e-05
StLNC2676	PGSC0003DMG400015096	PGSC0003DMT400039048	4111	Conserved gene of unknown function	0.954716	6.22379e-05
StLNC0626	PGSC0003DMG400037372	PGSC0003DMT400087801	4108	Mads box protein	0.95358	6.77994e-05
StLNC1368	PGSC0003DMG400037372	PGSC0003DMT400087801	4102	Mads box protein	0.978788	4.48349e-06
StLNC0625	PGSC0003DMG400037372	PGSC0003DMT400087801	4102	Mads box protein	0.955357	5.92494e-05
StLNC2745	PGSC0003DMG400013084	PGSC0003DMT400034043	4099	Late blight resistance protein Rpi-blb2	0.974248	8.79965e-06
StLNC1531	PGSC0003DMG400002995	PGSC0003DMT400007742	4082	Cellular nucleic acid binding protein	0.956975	5.21479e-05
StLNC0802	PGSC0003DMG400019594	PGSC0003DMT400050408	4074	Conserved gene of unknown function	0.958597	4.56614e-05
StLNC1034	PGSC0003DMG400034608	PGSC0003DMT400085037	4067	Type I MADS box transcription factor	0.979239	4.16006e-06
StLNC0317	PGSC0003DMG400036329	PGSC0003DMT400086758	4064	Gene of unknown function	0.974792	8.17059e-06
StLNC0990	PGSC0003DMG402032203	PGSC0003DMT400082016	4063	Extensin	0.971022	1.32573e-05
StLNC1584	PGSC0003DMG400037372	PGSC0003DMT400087801	4063	Mads box protein	0.963715	2.8917e-05
StLNC2721	PGSC0003DMG400037372	PGSC0003DMT400087801	4063	Mads box protein	0.96316	3.04784e-05
StLNC2415	PGSC0003DMG400025716	PGSC0003DMT400066058	4043	Conserved gene of unknown function	0.96013	4.00714e-05
StLNC1634	PGSC0003DMG400015053	PGSC0003DMT400038923	4031	GTP binding protein	0.959095	4.37862e-05
StLNC1778	PGSC0003DMG400007589	PGSC0003DMT400019638	4027	Gene of unknown function	0.958995	4.41582e-05
StLNC0971	PGSC0003DMG400004829	PGSC0003DMT400012323	4018	Conserved gene of unknown function	0.958621	4.55695e-05
StLNC2217	PGSC0003DMG400026810	PGSC0003DMT400068928	3994	Apple	0.956993	5.20764e-05
StLNC1812	PGSC0003DMG400042574	PGSC0003DMT400093003	3991	Conserved gene of unknown function	0.954423	6.36435e-05
StLNC2577	PGSC0003DMG400008536	PGSC0003DMT400022017	3987	Miraculin	0.953512	6.81469e-05
StLNC2456	PGSC0003DMG400033636	PGSC0003DMT400083869	3984	Cytochrome P450	0.95266	7.25555e-05
StLNC0021	PGSC0003DMG400026810	PGSC0003DMT400068928	3981	Apple	0.951219	8.04714e-05
StLNC0935	PGSC0003DMG400026809	PGSC0003DMT400068926	3974	Nucleic acid binding protein	0.950546	8.43663e-05
StLNC1717	PGSC0003DMG400016621	PGSC0003DMT400042841	3970	Cytochrome P450	0.950505	8.46061e-05
StLNC0672	PGSC0003DMG400006342	PGSC0003DMT400016230	3967	ER glycerol-phosphate acyltransferase	0.968062	1.858e-05
StLNC2533	PGSC0003DMG400006588	PGSC0003DMT400016842	3964	Conserved gene of unknown function	0.964704	2.62763e-05
StLNC1889	PGSC0003DMG403024846	PGSC0003DMT400063932	3935	B3 domain-containing protein REM8	0.962236	3.32097e-05
StLNC0413	PGSC0003DMG400004829	PGSC0003DMT400012323	3916	Conserved gene of unknown function	0.960168	3.99409e-05
StLNC1880	PGSC0003DMG400027689	PGSC0003DMT400071214	3912	Protein kinase APK1B, chloroplast	0.958708	4.52366e-05
StLNC0204	PGSC0003DMG400029855	PGSC0003DMT400076775	3906	Gene of unknown function	0.957103	5.16143e-05
StLNC1654	PGSC0003DMG400006342	PGSC0003DMT400016230	3880	ER glycerol-phosphate acyltransferase	0.954707	6.22813e-05
StLNC0686	PGSC0003DMG400037101	PGSC0003DMT400087530	3868	Gene of unknown function	0.954384	6.38292e-05
StLNC0062	PGSC0003DMG400004509	PGSC0003DMT400011484	3858	Conserved gene of unknown function	0.95328	6.93251e-05
StLNC1131	PGSC0003DMG400031770	PGSC0003DMT400081285	3839	Conserved gene of unknown function	0.952798	7.18312e-05
StLNC0044	PGSC0003DMG400037101	PGSC0003DMT400087530	3838	Gene of unknown function	0.950826	8.27324e-05
StLNC1487	PGSC0003DMG400044834	PGSC0003DMT400095263	3826	F-Box protein	0.950818	8.27778e-05
StLNC2156	PGSC0003DMG400039598	PGSC0003DMT400090027	3820	Gag-pol polyprotein	0.950691	8.35161e-05
StLNC0418	PGSC0003DMG400012313	PGSC0003DMT400032084	3813	Conserved gene of unknown function	0.950452	8.49216e-05
StLNC0915	PGSC0003DMG400001568	PGSC0003DMT400003984	3812	Gene of unknown function	0.950369	8.54128e-05
StLNC0916	PGSC0003DMG400008006	PGSC0003DMT400020657	3805	Kinesin heavy chain	0.979902	3.7157e-06
StLNC1727	PGSC0003DMG400017885	PGSC0003DMT400046087	3801	Conserved gene of unknown function	0.979521	3.9671e-06
StLNC1507	PGSC0003DMG400017885	PGSC0003DMT400046087	3801	Conserved gene of unknown function	0.978943	4.36986e-06
StLNC0554	PGSC0003DMG400027267	PGSC0003DMT400070152	3799	Conserved gene of unknown function	0.978757	4.5061e-06
StLNC0756	PGSC0003DMG400004407	PGSC0003DMT400011251	3791	Gene of unknown function	0.978211	4.92189e-06
StLNC1212	PGSC0003DMG400027505	PGSC0003DMT400070749	3785	Conserved gene of unknown function	0.978027	5.06781e-06
StLNC1907	PGSC0003DMG400009016	PGSC0003DMT400023279	3781	Pentatricopeptide repeat-containing protein	0.97764	5.38502e-06
StLNC2840	PGSC0003DMG400015222	PGSC0003DMT400039359	3779	Transposase	0.977333	5.64714e-06
StLNC0391	PGSC0003DMG400023041	PGSC0003DMT400059300	3772	Gene of unknown function	0.977286	5.68758e-06
StLNC0068	PGSC0003DMG402015159	PGSC0003DMT400039207	3769	Protein tipD	0.97704	5.905e-06
StLNC2556	PGSC0003DMG400014090	PGSC0003DMT400036560	3756	Ulp1 protease family, C-terminal catalytic domain containing protein	0.976712	6.203e-06
StLNC0492	PGSC0003DMG400002611	PGSC0003DMT400006719	3731	Gene of unknown function	0.976646	6.26457e-06
StLNC2259	PGSC0003DMG400021840	PGSC0003DMT400056206	3725	Gene of unknown function	0.97516	7.76289e-06
StLNC2136	PGSC0003DMG400027586	PGSC0003DMT400070945	3722	Serine-threonine protein kinase, plant-type	0.974813	8.14607e-06
StLNC2751	PGSC0003DMG400038806	PGSC0003DMT400089235	3715	Conserved gene of unknown function	0.974546	8.45108e-06
StLNC0582	PGSC0003DMG400009085	PGSC0003DMT400023465	3715	Hydroxyproline-rich glycoprotein GAS31	0.974404	8.61607e-06
StLNC1386	PGSC0003DMG400030635	PGSC0003DMT400078745	3687	DNA ligase	0.973113	1.02217e-05
StLNC0451	PGSC0003DMG400040798	PGSC0003DMT400091227	3677	Gene of unknown function	0.973011	1.03578e-05
StLNC1916	PGSC0003DMG400015026	PGSC0003DMT400038877	3670	Conserved gene of unknown function	0.972706	1.07695e-05
StLNC0780	PGSC0003DMG400038517	PGSC0003DMT400088946	3660	Conserved gene of unknown function	0.972636	1.08657e-05
StLNC1661	PGSC0003DMG400016599	PGSC0003DMT400042752	3658	Tospovirus resistance protein C	0.972635	1.08666e-05
StLNC0859	PGSC0003DMG400021268	PGSC0003DMT400054796	3656	Small glutamine-rich tetratricopeptide repeat-containing protein A	0.97215	1.15512e-05
StLNC0833	PGSC0003DMG400030225	PGSC0003DMT400077689	3640	Endo-beta-1,4-D-glucanase	0.971928	1.18733e-05
StLNC2772	PGSC0003DMG401026622	PGSC0003DMT400068462	3631	Nudix hydrolase 15, mitochondrial	0.971416	1.26419e-05
StLNC0982	PGSC0003DMG401026622	PGSC0003DMT400068462	3628	Nudix hydrolase 15, mitochondrial	0.970801	1.3613e-05
StLNC2178	PGSC0003DMG400024256	PGSC0003DMT400062331	3619	Gene of unknown function	0.970771	1.36606e-05
StLNC0798	PGSC0003DMG400005219	PGSC0003DMT400013381	3607	Gene of unknown function	0.970418	1.42423e-05
StLNC1489	PGSC0003DMG400043682	PGSC0003DMT400094111	3606	Gene of unknown function	0.970135	1.47199e-05
StLNC1010	PGSC0003DMG400000846	PGSC0003DMT400002209	3605	Binding protein	0.970109	1.47648e-05
StLNC1764	PGSC0003DMG400029898	PGSC0003DMT400076868	3603	Conserved gene of unknown function	0.96996	1.50221e-05
StLNC2417	PGSC0003DMG400006540	PGSC0003DMT400016730	3590	Histone ubiquitination proteins group	0.968411	1.78852e-05
StLNC1600	PGSC0003DMG400030270	PGSC0003DMT400077817	3589	RNase H family protein	0.967983	1.87409e-05
StLNC2462	PGSC0003DMG400018934	PGSC0003DMT400048721	3585	Anthranilate N-hydroxycinnamoyl/benzoyltransferase	0.967807	1.90993e-05
StLNC1059	PGSC0003DMG400041197	PGSC0003DMT400091626	3570	WRKY transcription factor 27	0.967336	2.00861e-05
StLNC0254	PGSC0003DMG400041197	PGSC0003DMT400091626	3563	WRKY transcription factor 27	0.966827	2.11923e-05
StLNC2342	PGSC0003DMG400032816	PGSC0003DMT400082785	3559	Zinc finger family protein	0.966192	2.26341e-05
StLNC1371	PGSC0003DMG400028110	PGSC0003DMT400072230	3517	Ubiquitin carrier protein	0.965609	2.40152e-05
StLNC1607	PGSC0003DMG400011403	PGSC0003DMT400029670	3511	Small nuclear ribonucleoprotein	0.96511	2.52446e-05
StLNC2476	PGSC0003DMG400041197	PGSC0003DMT400091626	3510	WRKY transcription factor 27	0.964383	2.71151e-05
StLNC1321	PGSC0003DMG400019704	PGSC0003DMT400050741	3503	Essential meiotic endonuclease 1B	0.963962	2.82417e-05
StLNC2142	PGSC0003DMG400001906	PGSC0003DMT400004793	3492	Gene of unknown function	0.963662	2.90654e-05
StLNC1504	PGSC0003DMG400000656	PGSC0003DMT400001756	3464	Conserved gene of unknown function	0.963543	2.93964e-05
StLNC1288	PGSC0003DMG400019651	PGSC0003DMT400050565	3453	WPP domain-interacting tail-anchored protein 2	0.963074	3.0727e-05
StLNC0408	PGSC0003DMG400024646	PGSC0003DMT400063357	3443	Expansin	0.962454	3.25509e-05
StLNC2694	PGSC0003DMG400033037	PGSC0003DMT400083063	3418	Ribulose bisphosphate carboxylase large chain	0.962303	3.30039e-05
StLNC2471	PGSC0003DMG400003171	PGSC0003DMT400008217	3403	Conserved gene of unknown function	0.962233	3.32174e-05
StLNC2388	PGSC0003DMG400021840	PGSC0003DMT400056206	3402	Gene of unknown function	0.961465	3.56163e-05
StLNC2166	PGSC0003DMG400021268	PGSC0003DMT400054796	3402	Small glutamine-rich tetratricopeptide repeat-containing protein A	0.960949	3.72942e-05
StLNC1223	PGSC0003DMG400047168	PGSC0003DMT400097597	3400	Gene of unknown function	0.960879	3.75267e-05
StLNC2810	PGSC0003DMG400041164	PGSC0003DMT400091593	3397	Transposon MuDR mudrA	0.960708	3.80975e-05
StLNC1087	PGSC0003DMG400028221	PGSC0003DMT400072533	3391	Tropinone reductase I	0.96049	3.8833e-05
StLNC2020	PGSC0003DMG400028221	PGSC0003DMT400072533	3387	Tropinone reductase I	0.960458	3.89439e-05
StLNC0694	PGSC0003DMG400041867	PGSC0003DMT400092296	3376	Metalloendoproteinase 1	0.960334	3.93667e-05
StLNC1963	PGSC0003DMG400018972	PGSC0003DMT400048829	3368	Zinc finger protein	0.959546	4.21408e-05
StLNC0231	PGSC0003DMG400041164	PGSC0003DMT400091593	3363	Transposon MuDR mudrA	0.957811	4.87274e-05
StLNC0378	PGSC0003DMG402028565	PGSC0003DMT400073532	3363	Sugar transporter	0.957169	5.13421e-05
StLNC1409	PGSC0003DMG400020553	PGSC0003DMT400052964	3359	Gene of unknown function	0.956729	5.31897e-05
StLNC2444	PGSC0003DMG400047254	PGSC0003DMT400097683	3358	Serine/threonine-protein kinase WNK8	0.956215	5.5403e-05
StLNC0144	PGSC0003DMG402028565	PGSC0003DMT400073532	3353	Sugar transporter	0.956022	5.62517e-05
StLNC1553	PGSC0003DMG400015645	PGSC0003DMT400040409	3330	GDP-mannose pyrophosphorylase	0.955955	5.65513e-05
StLNC2746	PGSC0003DMG400015645	PGSC0003DMT400040409	3330	GDP-mannose pyrophosphorylase	0.955378	5.91503e-05
StLNC0050	PGSC0003DMG400003201	PGSC0003DMT400008312	3329	Gene of unknown function	0.954379	6.3856e-05
StLNC0876	PGSC0003DMG401005707	PGSC0003DMT400014587	3328	Acireductone dioxygenase	0.953358	6.89279e-05
StLNC2619	PGSC0003DMG401005707	PGSC0003DMT400014587	3328	Acireductone dioxygenase	0.953143	7.00318e-05
StLNC0792	PGSC0003DMG400007231	PGSC0003DMT400018670	3315	Flavonol synthase/flavanone 3-hydroxylase	0.953114	7.01797e-05
StLNC2822	PGSC0003DMG400007542	PGSC0003DMT400019516	3313	Conserved gene of unknown function	0.952875	7.14227e-05
StLNC1488	PGSC0003DMG400043403	PGSC0003DMT400093832	3293	S-locus-specific glycoprotein S13	0.95276	7.20308e-05
StLNC2571	PGSC0003DMG400012325	PGSC0003DMT400032105	3293	SP1L	0.952219	7.49187e-05
StLNC1773	PGSC0003DMG400030255	PGSC0003DMT400077778	3290	Sn-1 protein	0.952156	7.52569e-05
StLNC0826	PGSC0003DMG400025598	PGSC0003DMT400065768	3281	Conserved gene of unknown function	0.952087	7.56356e-05
StLNC0274	PGSC0003DMG400012384	PGSC0003DMT400032225	3275	PttA2 protein	0.95183	7.70444e-05
StLNC2278	PGSC0003DMG400015645	PGSC0003DMT400040409	3265	GDP-mannose pyrophosphorylase	0.950822	8.27558e-05
StLNC0854	PGSC0003DMG400015308	PGSC0003DMT400039562	3262	Conserved gene of unknown function	0.952065	7.57545e-05
StLNC0365	PGSC0003DMG400010867	PGSC0003DMT400028174	3257	Gene of unknown function	0.958222	4.71056e-05
StLNC0728	PGSC0003DMG400026792	PGSC0003DMT400068892	3252	Brassinosteroid LRR receptor kinase	0.962449	3.25661e-05
StLNC2441	PGSC0003DMG400043403	PGSC0003DMT400093832	3249	S-locus-specific glycoprotein S13	0.959473	4.24028e-05
StLNC0520	PGSC0003DMG400012384	PGSC0003DMT400032225	3241	PttA2 protein	0.960593	3.84861e-05
StLNC2183	PGSC0003DMG400018569	PGSC0003DMT400047770	3240	Tetratricopeptide-like helical	0.975395	7.5109e-06
StLNC1919	PGSC0003DMG400013124	PGSC0003DMT400034158	3237	Receptor-kinase	0.967475	1.97926e-05
StLNC2258	PGSC0003DMG400013258	PGSC0003DMT400034492	3236	Conserved gene of unknown function	0.966379	2.22015e-05
StLNC1658	PGSC0003DMG400038480	PGSC0003DMT400088909	3236	DOG1 alpha splice variant	0.964824	2.59687e-05
StLNC2618	PGSC0003DMG400017556	PGSC0003DMT400045248	3234	Photosystem II 22 kDa protein, chloroplastic	0.964552	2.66726e-05
StLNC2007	PGSC0003DMG401005707	PGSC0003DMT400014587	3232	Acireductone dioxygenase	0.963399	2.97994e-05
StLNC0082	PGSC0003DMG401005707	PGSC0003DMT400014587	3232	Acireductone dioxygenase	0.961761	3.46773e-05
StLNC2371	PGSC0003DMG400013886	PGSC0003DMT400036051	3231	S-locus-specific glycoprotein S6	0.9603	3.94839e-05
StLNC2118	PGSC0003DMG400021211	PGSC0003DMT400054661	3219	Argonaute protein group	0.959411	4.2628e-05
StLNC1262	PGSC0003DMG400017587	PGSC0003DMT400045325	3207	Trypsin inhibitor 1	0.953402	6.87037e-05
StLNC2827	PGSC0003DMG400012149	PGSC0003DMT400031677	3204	Ubiquitin-protein ligase	0.95258	7.29792e-05
StLNC2740	PGSC0003DMG400012149	PGSC0003DMT400031677	3195	Ubiquitin-protein ligase	0.950065	8.7234e-05
StLNC2260	PGSC0003DMG400012149	PGSC0003DMT400031677	3195	Ubiquitin-protein ligase	0.976561	6.34403e-06
StLNC1679	PGSC0003DMG400012149	PGSC0003DMT400031677	3194	Ubiquitin-protein ligase	0.974963	7.97883e-06
StLNC1775	PGSC0003DMG400012149	PGSC0003DMT400031677	3190	Ubiquitin-protein ligase	0.974835	8.12198e-06
StLNC1079	PGSC0003DMG400006337	PGSC0003DMT400016212	3189	N-acetyltransferase	0.972257	1.13973e-05
StLNC1041	PGSC0003DMG400012149	PGSC0003DMT400031677	3174	Ubiquitin-protein ligase	0.971269	1.28696e-05
StLNC2803	PGSC0003DMG400012826	PGSC0003DMT400033385	3169	Auxin repressed/dormancy associated protein	0.970313	1.4419e-05
StLNC1738	PGSC0003DMG400004710	PGSC0003DMT400012001	3168	Protein arginine n-methyltransferase	0.969989	1.49724e-05
StLNC2393	PGSC0003DMG400012149	PGSC0003DMT400031677	3167	Ubiquitin-protein ligase	0.969394	1.60276e-05
StLNC0788	PGSC0003DMG400012149	PGSC0003DMT400031677	3160	Ubiquitin-protein ligase	0.969295	1.62074e-05
StLNC1792	PGSC0003DMG400025953	PGSC0003DMT400066758	3157	Conserved gene of unknown function	0.968468	1.77745e-05
StLNC1574	PGSC0003DMG400013124	PGSC0003DMT400034158	3148	Receptor-kinase	0.968049	1.8606e-05
StLNC1304	PGSC0003DMG400001108	PGSC0003DMT400002837	3136	Gene of unknown function	0.967785	1.91451e-05
StLNC1586	PGSC0003DMG401010686	PGSC0003DMT400027749	3133	Conserved gene of unknown function	0.967513	1.97121e-05
StLNC0821	PGSC0003DMG400023975	PGSC0003DMT400061587	3110	Cytochrome C oxidase assembly protein cox15	0.967142	2.05037e-05
StLNC0181	PGSC0003DMG400010625	PGSC0003DMT400027563	3108	1-O-acylglucose:anthocyanin-O-acyltransferase	0.966102	2.2843e-05
StLNC1132	PGSC0003DMG400017737	PGSC0003DMT400045740	3103	UDP-glucosyltransferase	0.965743	2.3692e-05
StLNC0622	PGSC0003DMG400020042	PGSC0003DMT400051598	3085	Pentatricopeptide	0.96542	2.44745e-05
StLNC1831	PGSC0003DMG400004770	PGSC0003DMT400012166	3068	Allyl alcohol dehydrogenase	0.965278	2.48265e-05
StLNC0041	PGSC0003DMG402011260	PGSC0003DMT400029309	3057	Conserved gene of unknown function	0.965236	2.49294e-05
StLNC2362	PGSC0003DMG400027837	PGSC0003DMT400071563	3051	Gene of unknown function	0.964917	2.57322e-05
StLNC0342	PGSC0003DMG400044521	PGSC0003DMT400094950	3029	Aspartyl protease family protein	0.96454	2.67015e-05
StLNC2529	PGSC0003DMG400008622	PGSC0003DMT400022218	3005	D1 protease	0.963941	2.82976e-05
StLNC0864	PGSC0003DMG400019284	PGSC0003DMT400049643	2998	Myosin VIII-B	0.963829	2.86029e-05
StLNC1971	PGSC0003DMG400014027	PGSC0003DMT400036428	2998	Germin	0.96361	2.92075e-05
StLNC1582	PGSC0003DMG402034311	PGSC0003DMT400084736	2990	Stress associated endoplasmic reticulum protein	0.963393	2.98173e-05
StLNC2644	PGSC0003DMG400034398	PGSC0003DMT400084827	2977	MAPKKK15	0.963328	2.99992e-05
StLNC0129	PGSC0003DMG401022115	PGSC0003DMT400056858	2974	Gene of unknown function	0.963307	3.00598e-05
StLNC1084	PGSC0003DMG401018810	PGSC0003DMT400048422	2973	Pentatricopeptide repeat-containing protein	0.963139	3.05383e-05
StLNC1328	PGSC0003DMG400042811	PGSC0003DMT400093240	2970	Gene of unknown function	0.963122	3.05866e-05
StLNC0733	PGSC0003DMG400023939	PGSC0003DMT400061511	2950	LOB domain-containing protein	0.962564	3.22198e-05
StLNC2534	PGSC0003DMG400027658	PGSC0003DMT400071119	2948	Conserved gene of unknown function	0.962288	3.30513e-05
StLNC0283	PGSC0003DMG400038135	PGSC0003DMT400088564	2947	Interferon-induced GTP-binding protein mx	0.962253	3.3156e-05
StLNC2121	PGSC0003DMG400011912	PGSC0003DMT400031090	2937	Gene of unknown function	0.962196	3.33301e-05
StLNC2785	PGSC0003DMG402012314	PGSC0003DMT400032086	2923	VIRB2-interacting protein 2	0.962051	3.3775e-05
StLNC1626	PGSC0003DMG400010678	PGSC0003DMT400027709	2918	Conserved gene of unknown function	0.961582	3.52446e-05
StLNC2617	PGSC0003DMG400041867	PGSC0003DMT400092296	2913	Metalloendoproteinase 1	0.960943	3.73154e-05
StLNC1395	PGSC0003DMG400015429	PGSC0003DMT400039889	2906	Polyadenylation factor subunit	0.96076	3.79243e-05
StLNC1449	PGSC0003DMG400002399	PGSC0003DMT400006170	2898	AP2 domain-containing transcription factor	0.96053	3.86983e-05
StLNC1629	PGSC0003DMG400028255	PGSC0003DMT400072619	2896	Soul heme-binding family protein	0.960527	3.87065e-05
StLNC0683	PGSC0003DMG400019662	PGSC0003DMT400050589	2890	ATP-binding cassette transporter	0.96038	3.92093e-05
StLNC2722	PGSC0003DMG400022241	PGSC0003DMT400057257	2883	Photosystem II 10 kDa polypeptide, chloroplastic	0.960096	4.01908e-05
StLNC2551	PGSC0003DMG400011718	PGSC0003DMT400030602	2881	Protein phosphatase 2c	0.959536	4.21771e-05
StLNC1043	PGSC0003DMG400019617	PGSC0003DMT400050486	2879	Conserved gene of unknown function	0.958288	4.68512e-05
StLNC1938	PGSC0003DMG400007371	PGSC0003DMT400019020	2876	Pre-mRNA-splicing factor cwc24	0.957267	5.09342e-05
StLNC1768	PGSC0003DMG400019224	PGSC0003DMT400049468	2874	NAD(P)H-quinone oxidoreductase subunit J, chloroplastic	0.957121	5.15405e-05
StLNC2239	PGSC0003DMG400002399	PGSC0003DMT400006170	2873	AP2 domain-containing transcription factor	0.9571	5.1627e-05
StLNC2370	PGSC0003DMG400042595	PGSC0003DMT400093024	2865	Gene of unknown function	0.956402	5.45894e-05
StLNC1480	PGSC0003DMG400020966	PGSC0003DMT400054060	2845	Gene of unknown function	0.956255	5.52304e-05
StLNC2241	PGSC0003DMG400008704	PGSC0003DMT400022462	2843	Gene of unknown function	0.955158	6.01649e-05
StLNC1044	PGSC0003DMG400019689	PGSC0003DMT400050703	2842	Gene of unknown function	0.955123	6.03262e-05
StLNC1231	PGSC0003DMG400023776	PGSC0003DMT400061112	2842	Partner of Y14-mago	0.954514	6.32055e-05
StLNC1248	PGSC0003DMG400013471	PGSC0003DMT400035026	2839	Glycine-rich protein 2	0.95421	6.46764e-05
StLNC0183	PGSC0003DMG400012926	PGSC0003DMT400033657	2837	Protein kinase	0.952936	7.11046e-05
StLNC2464	PGSC0003DMG400030593	PGSC0003DMT400078609	2835	Proteinase inhibitor IIa	0.952882	7.13897e-05
StLNC1621	PGSC0003DMG400002399	PGSC0003DMT400006170	2813	AP2 domain-containing transcription factor	0.952483	7.34982e-05
StLNC2401	PGSC0003DMG400005456	PGSC0003DMT400013942	2806	Protein phosphatase 2c	0.951817	7.71171e-05
StLNC1161	PGSC0003DMG400029919	PGSC0003DMT400076929	2798	Zinc finger family protein	0.951694	7.77954e-05
StLNC0058	PGSC0003DMG400002399	PGSC0003DMT400006170	2791	AP2 domain-containing transcription factor	0.950816	8.27909e-05
StLNC2725	PGSC0003DMG400040448	PGSC0003DMT400090877	2787	Conserved gene of unknown function	0.950704	8.34384e-05
StLNC2098	PGSC0003DMG400002399	PGSC0003DMT400006170	2785	AP2 domain-containing transcription factor	0.950669	8.36479e-05
StLNC0220	PGSC0003DMG400002399	PGSC0003DMT400006170	2766	AP2 domain-containing transcription factor	0.950548	8.43542e-05
StLNC1025	PGSC0003DMG402004368	PGSC0003DMT400011160	2757	Conserved gene of unknown function	0.950262	8.60515e-05
StLNC1571	PGSC0003DMG400030748	PGSC0003DMT400079004	2746	Dnajc14 protein	0.950112	8.69497e-05
StLNC1363	PGSC0003DMG400022239	PGSC0003DMT400057255	2746	Seed maturation protein	0.951768	7.7386e-05
StLNC2480	PGSC0003DMG400016400	PGSC0003DMT400042253	2742	Zinc finger CCCH domain-containing protein 32	0.952924	7.11709e-05
StLNC0543	PGSC0003DMG400030748	PGSC0003DMT400079004	2740	Dnajc14 protein	0.979509	3.9747e-06
StLNC2731	PGSC0003DMG400030748	PGSC0003DMT400079004	2740	Dnajc14 protein	0.979235	4.16301e-06
StLNC0707	PGSC0003DMG400041568	PGSC0003DMT400091997	2729	Conserved gene of unknown function	0.978005	5.08576e-06
StLNC0790	PGSC0003DMG400023776	PGSC0003DMT400061112	2727	Partner of Y14-mago	0.977878	5.18846e-06
StLNC1646	PGSC0003DMG400003351	PGSC0003DMT400008648	2722	Skip-2	0.976789	6.1326e-06
StLNC2017	PGSC0003DMG400023044	PGSC0003DMT400059307	2708	Ulp1 protease family, C-terminal catalytic domain containing protein	0.976065	6.82334e-06
StLNC2144	PGSC0003DMG400025142	PGSC0003DMT400064723	2695	Pc21g16870 protein	0.975773	7.11713e-06
StLNC2267	PGSC0003DMG400017956	PGSC0003DMT400046254	2688	Protein cdcH	0.975188	7.73243e-06
StLNC0873	PGSC0003DMG400002488	PGSC0003DMT400006368	2683	Mitochondrial import inner membrane translocase subunit Tim17 family protein	0.974648	8.33401e-06
StLNC1791	PGSC0003DMG400023044	PGSC0003DMT400059307	2681	Ulp1 protease family, C-terminal catalytic domain containing protein	0.974303	8.7347e-06
StLNC2700	PGSC0003DMG400003798	PGSC0003DMT400009710	2678	High affinity inorganic phosphate transporter	0.974102	8.97379e-06
StLNC2854	PGSC0003DMG400026655	PGSC0003DMT400068527	2674	Binding protein	0.973533	9.67725e-06
StLNC2224	PGSC0003DMG400024863	PGSC0003DMT400063966	2668	Cytochrome P450 hydroxylase	0.973526	9.68709e-06
StLNC1512	PGSC0003DMG400008293	PGSC0003DMT400021373	2663	Conserved gene of unknown function	0.973074	1.0273e-05
StLNC2645	PGSC0003DMG400010258	PGSC0003DMT400026564	2662	F-box family protein	0.972702	1.07749e-05
StLNC1614	PGSC0003DMG400016850	PGSC0003DMT400043408	2656	Short chain alcohol dehydrogenase	0.972097	1.16275e-05
StLNC0913	PGSC0003DMG400035125	PGSC0003DMT400085554	2646	Gene of unknown function	0.971933	1.18669e-05
StLNC2434	PGSC0003DMG400035125	PGSC0003DMT400085554	2644	Gene of unknown function	0.971752	1.21341e-05
StLNC2538	PGSC0003DMG400025142	PGSC0003DMT400064723	2637	Pc21g16870 protein	0.971709	1.21981e-05
StLNC0199	PGSC0003DMG400014983	PGSC0003DMT400038770	2633	RNase H family protein	0.971543	1.24488e-05
StLNC1532	PGSC0003DMG400023044	PGSC0003DMT400059307	2630	Ulp1 protease family, C-terminal catalytic domain containing protein	0.971223	1.29411e-05
StLNC2143	PGSC0003DMG400023044	PGSC0003DMT400059307	2630	Ulp1 protease family, C-terminal catalytic domain containing protein	0.971223	1.29419e-05
StLNC1579	PGSC0003DMG400024863	PGSC0003DMT400063966	2616	Cytochrome P450 hydroxylase	0.971187	1.29974e-05
StLNC1392	PGSC0003DMG400038944	PGSC0003DMT400089373	2598	Uncharacterized histidine-rich protein DDB_G0274557	0.969978	1.49911e-05
StLNC1678	PGSC0003DMG400024863	PGSC0003DMT400063966	2592	Cytochrome P450 hydroxylase	0.969435	1.59527e-05
StLNC2526	PGSC0003DMG400010789	PGSC0003DMT400027989	2585	Exocyst complex component	0.968773	1.71842e-05
StLNC2038	PGSC0003DMG400015850	PGSC0003DMT400040971	2584	IDS4	0.967864	1.89823e-05
StLNC2790	PGSC0003DMG400040467	PGSC0003DMT400090896	2575	Bifunctional endo-1,4-beta-xylanase xylA	0.967301	2.01613e-05
StLNC1005	PGSC0003DMG400031186	PGSC0003DMT400080089	2571	Gene of unknown function	0.966238	2.25276e-05
StLNC1075	PGSC0003DMG400024863	PGSC0003DMT400063966	2567	Cytochrome P450 hydroxylase	0.965876	2.33759e-05
StLNC1454	PGSC0003DMG400025319	PGSC0003DMT400065148	2562	NADH dehydrogenase	0.964659	2.63926e-05
StLNC0110	PGSC0003DMG400037004	PGSC0003DMT400087433	2562	Conserved gene of unknown function	0.964201	2.75988e-05
StLNC0251	PGSC0003DMG400012704	PGSC0003DMT400033082	2557	Conserved gene of unknown function	0.962106	3.3608e-05
StLNC0575	PGSC0003DMG400006643	PGSC0003DMT400017004	2553	Gene of unknown function	0.962019	3.38748e-05
StLNC0018	PGSC0003DMG400024863	PGSC0003DMT400063966	2549	Cytochrome P450 hydroxylase	0.961939	3.4123e-05
StLNC0276	PGSC0003DMG400005157	PGSC0003DMT400013206	2539	Gene of unknown function	0.961258	3.62822e-05
StLNC1648	PGSC0003DMG400043463	PGSC0003DMT400093892	2522	Gene of unknown function	0.960314	3.94351e-05
StLNC0369	PGSC0003DMG400009460	PGSC0003DMT400024472	2519	Conserved gene of unknown function	0.959965	4.06496e-05
StLNC0736	PGSC0003DMG400010273	PGSC0003DMT400026596	2518	Peroxisomal biogenesis factor	0.959753	4.13998e-05
StLNC0825	PGSC0003DMG400010622	PGSC0003DMT400027553	2517	Conserved gene of unknown function	0.958725	4.5172e-05
StLNC1956	PGSC0003DMG400001011	PGSC0003DMT400002631	2516	Gene of unknown function	0.955735	5.75323e-05
StLNC2094	PGSC0003DMG400026798	PGSC0003DMT400068903	2512	Gene of unknown function	0.955665	5.78476e-05
StLNC1749	PGSC0003DMG400006301	PGSC0003DMT400016119	2506	Translocase of chloroplast 159, chloroplastic	0.954727	6.21895e-05
StLNC2271	PGSC0003DMG402024222	PGSC0003DMT400062256	2498	BRASSINOSTEROID INSENSITIVE 1-associated receptor kinase 1	0.954469	6.34226e-05
StLNC0959	PGSC0003DMG400029187	PGSC0003DMT400075040	2494	EMB3013	0.954382	6.38413e-05
StLNC2584	PGSC0003DMG400020488	PGSC0003DMT400052781	2493	Nuclear RNA binding protein	0.954026	6.55792e-05
StLNC2061	PGSC0003DMG400000323	PGSC0003DMT400000859	2492	Conserved gene of unknown function	0.951817	7.71146e-05
StLNC2367	PGSC0003DMG400035081	PGSC0003DMT400085510	2487	Gene of unknown function	0.950544	8.43769e-05
StLNC0608	PGSC0003DMG400017307	PGSC0003DMT400044590	2478	ATFP4	0.960387	3.91849e-05
StLNC0291	PGSC0003DMG400017307	PGSC0003DMT400044590	2475	ATFP4	0.960995	3.71414e-05
StLNC1199	PGSC0003DMG400024112	PGSC0003DMT400061957	2473	Gene of unknown function	0.957436	5.02424e-05
StLNC0086	PGSC0003DMG400000655	PGSC0003DMT400001750	2444	Serine/threonine-protein phosphatase 7 long form homolog	0.955153	6.01879e-05
StLNC2255	PGSC0003DMG400003161	PGSC0003DMT400008202	2435	Inositol-tetrakisphosphate 1-kinase	0.950294	8.58613e-05
StLNC0468	PGSC0003DMG400003161	PGSC0003DMT400008202	2435	Inositol-tetrakisphosphate 1-kinase	0.950169	8.66077e-05
StLNC1259	PGSC0003DMG400018242	PGSC0003DMT400046967	2401	Type I MADS box transcription factor	0.979604	3.91122e-06
StLNC1871	PGSC0003DMG400018242	PGSC0003DMT400046967	2395	Type I MADS box transcription factor	0.977413	5.5781e-06
StLNC1922	PGSC0003DMG400011334	PGSC0003DMT400029476	2391	Phylloplanin	0.977186	5.77531e-06
StLNC2695	PGSC0003DMG400041018	PGSC0003DMT400091447	2386	RTM1 protein	0.976509	6.39344e-06
StLNC0503	PGSC0003DMG400024243	PGSC0003DMT400062300	2367	Conserved gene of unknown function	0.97349	9.73268e-06
StLNC0325	PGSC0003DMG400019765	PGSC0003DMT400050887	2364	Polyprotein	0.973251	1.00409e-05
StLNC2710	PGSC0003DMG400012325	PGSC0003DMT400032105	2354	SP1L	0.972568	1.09595e-05
StLNC2173	PGSC0003DMG402030099	PGSC0003DMT400077379	2350	Prosystemin	0.972114	1.16019e-05
StLNC1856	PGSC0003DMG400011388	PGSC0003DMT400029616	2342	KUP1	0.97208	1.16518e-05
StLNC2809	PGSC0003DMG400039445	PGSC0003DMT400089874	2338	Gene of unknown function	0.971847	1.19928e-05
StLNC2050	PGSC0003DMG400015644	PGSC0003DMT400040401	2325	Gene of unknown function	0.971488	1.25327e-05
StLNC0620	PGSC0003DMG400006153	PGSC0003DMT400015748	2324	Conserved gene of unknown function	0.97069	1.37934e-05
StLNC0377	PGSC0003DMG402025733	PGSC0003DMT400066100	2322	Gene of unknown function	0.968643	1.74335e-05
StLNC2012	PGSC0003DMG400007242	PGSC0003DMT400018694	2315	Zinc finger protein	0.968134	1.84359e-05
StLNC2699	PGSC0003DMG400010867	PGSC0003DMT400028174	2312	Gene of unknown function	0.965585	2.40739e-05
StLNC0654	PGSC0003DMG401017938	PGSC0003DMT400046210	2293	Gene of unknown function	0.964287	2.73699e-05
StLNC2104	PGSC0003DMG400035061	PGSC0003DMT400085490	2275	Conserved gene of unknown function	0.963362	2.99038e-05
StLNC1638	PGSC0003DMG400024132	PGSC0003DMT400062007	2256	Gene of unknown function	0.961505	3.54898e-05
StLNC1443	PGSC0003DMG400015710	PGSC0003DMT400040632	2254	Gene of unknown function	0.960668	3.82329e-05
StLNC2623	PGSC0003DMG400000344	PGSC0003DMT400000917	2250	Splicing factor U2af large subunit B	0.960214	3.97822e-05
StLNC1585	PGSC0003DMG400018572	PGSC0003DMT400047775	2233	Disease resistance protein I2C-5	0.959171	4.35073e-05
StLNC0806	PGSC0003DMG400042811	PGSC0003DMT400093240	2230	Gene of unknown function	0.958789	4.49316e-05
StLNC2399	PGSC0003DMG400036408	PGSC0003DMT400086837	2229	Gene of unknown function	0.958112	4.7535e-05
StLNC1320	PGSC0003DMG400006794	PGSC0003DMT400017493	2225	PHD finger family protein	0.957279	5.08883e-05
StLNC0459	PGSC0003DMG400007269	PGSC0003DMT400018756	2223	Beta-galactosidase	0.956288	5.50854e-05
StLNC2763	PGSC0003DMG400004452	PGSC0003DMT400011366	2218	Nucleotide binding protein	0.956181	5.55511e-05
StLNC0095	PGSC0003DMG400003171	PGSC0003DMT400008217	2212	Conserved gene of unknown function	0.956118	5.58307e-05
StLNC1689	PGSC0003DMG401014665	PGSC0003DMT400038023	2208	Mitochondrial phosphate carrier protein	0.955472	5.87198e-05
StLNC2661	PGSC0003DMG402027402	PGSC0003DMT400070482	2203	Disease resistance protein R3a	0.954236	6.4548e-05
StLNC1080	PGSC0003DMG400046448	PGSC0003DMT400096877	2196	GTP1/OBG family member	0.953363	6.89031e-05
StLNC1999	PGSC0003DMG400018572	PGSC0003DMT400047775	2191	Disease resistance protein I2C-5	0.952131	7.53936e-05
StLNC1493	PGSC0003DMG400018572	PGSC0003DMT400047775	2190	Disease resistance protein I2C-5	0.952128	7.54118e-05
StLNC0727	PGSC0003DMG400031145	PGSC0003DMT400079988	2179	Conserved gene of unknown function	0.951352	7.97173e-05
StLNC1731	PGSC0003DMG400018429	PGSC0003DMT400047418	2177	Bacterial spot disease resistance protein 4	0.950916	8.22074e-05
StLNC1341	PGSC0003DMG400031141	PGSC0003DMT400079981	2173	Nt-rab7c protein	0.950505	8.46064e-05
StLNC0510	PGSC0003DMG400008912	PGSC0003DMT400023026	2170	Actin-71	0.950287	8.59017e-05
StLNC1400	PGSC0003DMG400009808	PGSC0003DMT400025403	2158	K(+) efflux antiporter 6	0.956868	5.25993e-05
StLNC1858	PGSC0003DMG400004518	PGSC0003DMT400011496	2147	Gene of unknown function	0.979343	4.08819e-06
StLNC0988	PGSC0003DMG400011517	PGSC0003DMT400030011	2147	HJTR2GH1 protein	0.971575	1.23995e-05
StLNC0924	PGSC0003DMG400031145	PGSC0003DMT400079988	2137	Conserved gene of unknown function	0.970481	1.41368e-05
StLNC0936	PGSC0003DMG400007898	PGSC0003DMT400020442	2122	Conserved gene of unknown function	0.969893	1.51391e-05
StLNC1701	PGSC0003DMG400005293	PGSC0003DMT400013554	2121	Conserved gene of unknown function	0.969597	1.56623e-05
StLNC0107	PGSC0003DMG400019688	PGSC0003DMT400050689	2115	SEN1	0.966438	2.20672e-05
StLNC2681	PGSC0003DMG400017885	PGSC0003DMT400046087	2109	Conserved gene of unknown function	0.966393	2.21693e-05
StLNC0438	PGSC0003DMG400009088	PGSC0003DMT400023470	2107	Galactomannan galactosyl transferase	0.966019	2.30366e-05
StLNC2561	PGSC0003DMG400010546	PGSC0003DMT400027345	2103	Gene of unknown function	0.963949	2.82769e-05
StLNC1345	PGSC0003DMG400019858	PGSC0003DMT400051126	2090	Pentatricopeptide repeat-containing protein	0.961698	3.48746e-05
StLNC0914	PGSC0003DMG400000107	PGSC0003DMT400000316	2089	B3 domain-containing protein	0.960794	3.78082e-05
StLNC1333	PGSC0003DMG400024665	PGSC0003DMT400063408	2078	Kinase	0.960265	3.96048e-05
StLNC1551	PGSC0003DMG400005293	PGSC0003DMT400013554	2076	Conserved gene of unknown function	0.960184	3.98857e-05
StLNC1589	PGSC0003DMG400005293	PGSC0003DMT400013554	2066	Conserved gene of unknown function	0.958843	4.47291e-05
StLNC0974	PGSC0003DMG400005293	PGSC0003DMT400013554	2063	Conserved gene of unknown function	0.958134	4.74511e-05
StLNC0967	PGSC0003DMG400030801	PGSC0003DMT400079138	2061	Gene of unknown function	0.957963	4.8123e-05
StLNC2548	PGSC0003DMG401029631	PGSC0003DMT400076208	2044	Pleiotropic drug resistance protein 1	0.957315	5.07405e-05
StLNC1876	PGSC0003DMG400043689	PGSC0003DMT400094118	2044	Gene of unknown function	0.956755	5.30768e-05
StLNC1526	PGSC0003DMG404012723	PGSC0003DMT400033140	2040	Pentatricopeptide repeat-containing protein	0.956404	5.45839e-05
StLNC0457	PGSC0003DMG400018242	PGSC0003DMT400046967	2036	Type I MADS box transcription factor	0.956163	5.56313e-05
StLNC0525	PGSC0003DMG400015308	PGSC0003DMT400039562	2028	Conserved gene of unknown function	0.956083	5.59817e-05
StLNC2692	PGSC0003DMG400019761	PGSC0003DMT400050868	2023	Gene of unknown function	0.956055	5.6109e-05
StLNC0880	PGSC0003DMG400030240	PGSC0003DMT400077738	2020	CC-NBS-LRR protein	0.95595	5.6571e-05
StLNC2581	PGSC0003DMG400017156	PGSC0003DMT400044194	2016	Heterogeneous nuclear ribonucleoprotein 27C	0.954517	6.31899e-05
StLNC1407	PGSC0003DMG400014782	PGSC0003DMT400038307	2010	Pentatricopeptide repeat-containing protein	0.953043	7.05477e-05
StLNC2436	PGSC0003DMG400001765	PGSC0003DMT400004427	2006	Conserved gene of unknown function	0.952587	7.29438e-05
StLNC1598	PGSC0003DMG400003186	PGSC0003DMT400008260	2004	Gene of unknown function	0.952285	7.45629e-05
StLNC1564	PGSC0003DMG400005293	PGSC0003DMT400013554	1998	Conserved gene of unknown function	0.952066	7.5746e-05
StLNC2588	PGSC0003DMG400005293	PGSC0003DMT400013554	1997	Conserved gene of unknown function	0.951848	7.69438e-05
StLNC1707	PGSC0003DMG400005293	PGSC0003DMT400013554	1988	Conserved gene of unknown function	0.950688	8.35351e-05
StLNC0491	PGSC0003DMG400003020	PGSC0003DMT400007810	1987	Disease resistance protein R3a	0.962536	3.23041e-05
StLNC0245	PGSC0003DMG400027940	PGSC0003DMT400071814	1986	ATP binding protein	0.950526	8.44856e-05
StLNC1422	PGSC0003DMG400005293	PGSC0003DMT400013554	1984	Conserved gene of unknown function	0.962823	3.14561e-05
StLNC2591	PGSC0003DMG400005293	PGSC0003DMT400013554	1983	Conserved gene of unknown function	0.959444	4.25088e-05
StLNC0669	PGSC0003DMG400023524	PGSC0003DMT400060473	1979	UDP-glucuronate decarboxylase 1	0.957599	4.95824e-05
StLNC0875	PGSC0003DMG400015350	PGSC0003DMT400039717	1978	Monooxygenase	0.954306	6.42069e-05
StLNC0033	PGSC0003DMG400009432	PGSC0003DMT400024402	1978	Cholinephosphate cytidylyltransferase	0.963265	3.01792e-05
StLNC2683	PGSC0003DMG400040020	PGSC0003DMT400090449	1963	Trehalose-6-phosphate synthase	0.962893	3.12496e-05
StLNC2138	PGSC0003DMG400002432	PGSC0003DMT400006239	1933	Gene of unknown function	0.954947	6.11507e-05
StLNC2188	PGSC0003DMG400006794	PGSC0003DMT400017493	1930	PHD finger family protein	0.954456	6.34826e-05
StLNC2734	PGSC0003DMG400033572	PGSC0003DMT400083746	1928	Sentrin/sumo-specific protease	0.95335	6.89677e-05
StLNC0521	PGSC0003DMG400032190	PGSC0003DMT400081989	1922	Acidic ribosomal protein P1a	0.961451	3.56622e-05
StLNC0335	PGSC0003DMG400017390	PGSC0003DMT400044808	1920	RNA binding protein	0.979967	3.6743e-06
StLNC1713	PGSC0003DMG400014836	PGSC0003DMT400038438	1912	Steroid binding protein	0.979018	4.31616e-06
StLNC1294	PGSC0003DMG403004220	PGSC0003DMT400010803	1911	Sugar transporter	0.979008	4.32346e-06
StLNC0270	PGSC0003DMG400006863	PGSC0003DMT400017698	1896	YA3	0.978222	4.91329e-06
StLNC2814	PGSC0003DMG400041066	PGSC0003DMT400091495	1890	Gene of unknown function	0.976749	6.16934e-06
StLNC2439	PGSC0003DMG400002432	PGSC0003DMT400006239	1887	Gene of unknown function	0.975954	6.93364e-06
StLNC2058	PGSC0003DMG400016409	PGSC0003DMT400042319	1883	Protein kinase family protein	0.974907	8.04079e-06
StLNC1366	PGSC0003DMG400015854	PGSC0003DMT400040979	1882	Gene of unknown function	0.974648	8.33353e-06
StLNC1011	PGSC0003DMG400015854	PGSC0003DMT400040979	1882	Gene of unknown function	0.973561	9.64276e-06
StLNC1544	PGSC0003DMG400030239	PGSC0003DMT400077736	1866	CC-NBS-LRR protein	0.973173	1.01432e-05
StLNC1540	PGSC0003DMG400000129	PGSC0003DMT400000365	1865	SAUR family protein	0.972866	1.05511e-05
StLNC0458	PGSC0003DMG400003469	PGSC0003DMT400008916	1862	Phosphonopyruvate decarboxylase	0.972785	1.06611e-05
StLNC2214	PGSC0003DMG400012971	PGSC0003DMT400033762	1853	Protein phosphatase 2A	0.972631	1.08724e-05
StLNC0751	PGSC0003DMG400014672	PGSC0003DMT400038054	1852	C-7 protein	0.972583	1.09384e-05
StLNC1375	PGSC0003DMG400017870	PGSC0003DMT400046054	1852	Auxin:hydrogen symporter	0.972562	1.0968e-05
StLNC1657	PGSC0003DMG400014672	PGSC0003DMT400038054	1848	C-7 protein	0.971907	1.19038e-05
StLNC0395	PGSC0003DMG400004929	PGSC0003DMT400012607	1847	YEATS domain-containing protein	0.971892	1.1927e-05
StLNC2682	PGSC0003DMG400005293	PGSC0003DMT400013554	1847	Conserved gene of unknown function	0.971526	1.24748e-05
StLNC0134	PGSC0003DMG400005293	PGSC0003DMT400013554	1847	Conserved gene of unknown function	0.97109	1.31506e-05
StLNC1874	PGSC0003DMG400005151	PGSC0003DMT400013188	1846	Conserved gene of unknown function	0.970423	1.42335e-05
StLNC2513	PGSC0003DMG400012906	PGSC0003DMT400033602	1827	Conserved gene of unknown function	0.970197	1.4614e-05
StLNC0390	PGSC0003DMG400006863	PGSC0003DMT400017698	1826	YA3	0.96958	1.56926e-05
StLNC2546	PGSC0003DMG400028591	PGSC0003DMT400073599	1820	Conserved gene of unknown function	0.96935	1.61069e-05
StLNC1245	PGSC0003DMG400027621	PGSC0003DMT400071021	1805	Conserved gene of unknown function	0.969086	1.65945e-05
StLNC2041	PGSC0003DMG400005293	PGSC0003DMT400013554	1805	Conserved gene of unknown function	0.968933	1.68812e-05
StLNC1220	PGSC0003DMG400005293	PGSC0003DMT400013554	1805	Conserved gene of unknown function	0.96861	1.74981e-05
StLNC1909	PGSC0003DMG400011964	PGSC0003DMT400031233	1804	Mannitol transporter	0.967927	1.88544e-05
StLNC2284	PGSC0003DMG400024523	PGSC0003DMT400063026	1804	Transcription factor BIM1	0.9678	1.91141e-05
StLNC1770	PGSC0003DMG400047074	PGSC0003DMT400097503	1802	BURP domain-containing protein	0.967536	1.96643e-05
StLNC1491	PGSC0003DMG400028591	PGSC0003DMT400073599	1801	Conserved gene of unknown function	0.967354	2.00475e-05
StLNC2847	PGSC0003DMG400000537	PGSC0003DMT400001460	1792	Guanosine-3',5'-bis(Diphosphate) 3'-pyrophosphohydrolase	0.966419	2.21104e-05
StLNC0260	PGSC0003DMG400019019	PGSC0003DMT400048945	1788	60S ribosomal protein L35	0.965448	2.44061e-05
StLNC1548	PGSC0003DMG402008964	PGSC0003DMT400023158	1785	Solute carrier family 35, member F1	0.965309	2.47502e-05
StLNC1406	PGSC0003DMG400028591	PGSC0003DMT400073599	1782	Conserved gene of unknown function	0.964916	2.5734e-05
StLNC1273	PGSC0003DMG400041066	PGSC0003DMT400091495	1781	Gene of unknown function	0.964449	2.69396e-05
StLNC2127	PGSC0003DMG400008885	PGSC0003DMT400022924	1779	Fatty acyl-CoA reductase 2	0.963246	3.02327e-05
StLNC0429	PGSC0003DMG400024918	PGSC0003DMT400064125	1775	Conserved gene of unknown function	0.962048	3.37865e-05
StLNC2668	PGSC0003DMG400030239	PGSC0003DMT400077736	1753	CC-NBS-LRR protein	0.961982	3.39874e-05
StLNC0396	PGSC0003DMG400008615	PGSC0003DMT400022199	1752	Pentatricopeptide repeat-containing protein	0.961402	3.5817e-05
StLNC1261	PGSC0003DMG400011964	PGSC0003DMT400031233	1752	Mannitol transporter	0.960946	3.73031e-05
StLNC1604	PGSC0003DMG400014672	PGSC0003DMT400038054	1749	C-7 protein	0.960734	3.80096e-05
StLNC0540	PGSC0003DMG400014672	PGSC0003DMT400038054	1749	C-7 protein	0.960225	3.97441e-05
StLNC2308	PGSC0003DMG400011964	PGSC0003DMT400031233	1748	Mannitol transporter	0.959541	4.21582e-05
StLNC2077	PGSC0003DMG400011964	PGSC0003DMT400031233	1747	Mannitol transporter	0.959379	4.27455e-05
StLNC2423	PGSC0003DMG400011964	PGSC0003DMT400031233	1747	Mannitol transporter	0.95861	4.56093e-05
StLNC0303	PGSC0003DMG400011964	PGSC0003DMT400031233	1747	Mannitol transporter	0.957909	4.83394e-05
StLNC2422	PGSC0003DMG400011964	PGSC0003DMT400031233	1741	Mannitol transporter	0.957173	5.13267e-05
StLNC0393	PGSC0003DMG400028211	PGSC0003DMT400072508	1710	Conserved gene of unknown function	0.956703	5.32965e-05
StLNC2781	PGSC0003DMG400006897	PGSC0003DMT400017758	1704	Conserved gene of unknown function	0.954926	6.12489e-05
StLNC2632	PGSC0003DMG400043836	PGSC0003DMT400094265	1697	Kinase	0.954778	6.19457e-05
StLNC0089	PGSC0003DMG400011334	PGSC0003DMT400029476	1693	Phylloplanin	0.954705	6.22897e-05
StLNC0987	PGSC0003DMG400023807	PGSC0003DMT400061174	1690	Gene of unknown function	0.954176	6.48432e-05
StLNC0514	PGSC0003DMG400030270	PGSC0003DMT400077817	1680	RNase H family protein	0.953262	6.94192e-05
StLNC0739	PGSC0003DMG400029898	PGSC0003DMT400076868	1668	Conserved gene of unknown function	0.953064	7.04423e-05
StLNC2540	PGSC0003DMG400032826	PGSC0003DMT400082811	1660	Conserved gene of unknown function	0.952638	7.26745e-05
StLNC2124	PGSC0003DMG400012136	PGSC0003DMT400031648	1631	Structural constituent of ribosome	0.952442	7.37192e-05
StLNC1662	PGSC0003DMG401002177	PGSC0003DMT400005561	1631	Glutathione S-transferase	0.95228	7.45871e-05
StLNC1757	PGSC0003DMG400029294	PGSC0003DMT400075325	1623	Mob1	0.951326	7.98629e-05
StLNC2438	PGSC0003DMG400040673	PGSC0003DMT400091102	1605	Gene of unknown function	0.951277	8.01408e-05
StLNC2105	PGSC0003DMG400020644	PGSC0003DMT400053185	1603	PPR1 protein	0.950182	8.6528e-05
StLNC1359	PGSC0003DMG400040086	PGSC0003DMT400090515	1587	Regulator of ribonuclease activity A	0.972434	1.11466e-05
StLNC0571	PGSC0003DMG400010936	PGSC0003DMT400028377	1567	Gene of unknown function	0.971231	1.29283e-05
StLNC1471	PGSC0003DMG400010936	PGSC0003DMT400028377	1566	Gene of unknown function	0.969839	1.52329e-05
StLNC0858	PGSC0003DMG400010936	PGSC0003DMT400028377	1566	Gene of unknown function	0.964609	2.65219e-05
StLNC2222	PGSC0003DMG400010936	PGSC0003DMT400028377	1566	Gene of unknown function	0.957886	4.84311e-05
StLNC2849	PGSC0003DMG400015675	PGSC0003DMT400040488	1559	Lyase	0.951	8.17232e-05
StLNC1125	PGSC0003DMG400015675	PGSC0003DMT400040488	1559	Lyase	0.979706	3.84341e-06
StLNC1952	PGSC0003DMG400026271	PGSC0003DMT400067568	1544	Map3k delta-1 protein kinase	0.979454	4.01215e-06
StLNC2736	PGSC0003DMG400011334	PGSC0003DMT400029476	1541	Phylloplanin	0.979319	4.10431e-06
StLNC1058	PGSC0003DMG400005374	PGSC0003DMT400013738	1537	Pentatricopeptide repeat-containing protein	0.979102	4.25629e-06
StLNC0731	PGSC0003DMG400017990	PGSC0003DMT400046351	1516	WRKY transcription factor	0.978851	4.4369e-06
StLNC1829	PGSC0003DMG402008965	PGSC0003DMT400023163	1516	Gene of unknown function	0.977919	5.15515e-06
StLNC0106	PGSC0003DMG400000344	PGSC0003DMT400000917	1516	Splicing factor U2af large subunit B	0.977667	5.36238e-06
StLNC2153	PGSC0003DMG400001514	PGSC0003DMT400003820	1515	Srpk	0.977531	5.47733e-06
StLNC0729	PGSC0003DMG400028494	PGSC0003DMT400073322	1512	Conserved gene of unknown function	0.976815	6.10843e-06
StLNC0904	PGSC0003DMG400015429	PGSC0003DMT400039889	1511	Polyadenylation factor subunit	0.975794	7.09571e-06
StLNC1511	PGSC0003DMG400041164	PGSC0003DMT400091593	1499	Transposon MuDR mudrA	0.975348	7.56075e-06
StLNC0984	PGSC0003DMG400022826	PGSC0003DMT400058755	1492	Pentatricopeptide repeat-containing protein	0.975332	7.57825e-06
StLNC2445	PGSC0003DMG400028560	PGSC0003DMT400073505	1488	Receptor protein kinase	0.974903	8.0453e-06
StLNC1618	PGSC0003DMG400003186	PGSC0003DMT400008260	1479	Gene of unknown function	0.974494	8.51033e-06
StLNC2128	PGSC0003DMG400024880	PGSC0003DMT400064010	1477	Conserved gene of unknown function	0.974322	8.71225e-06
StLNC1516	PGSC0003DMG402004586	PGSC0003DMT400011671	1473	Wiscott-Aldrich syndrome, C-terminal	0.974048	9.03882e-06
StLNC1093	PGSC0003DMG400002789	PGSC0003DMT400007215	1470	ABC transporter family protein	0.973919	9.19659e-06
StLNC2287	PGSC0003DMG400010694	PGSC0003DMT400027781	1469	Conserved gene of unknown function	0.973856	9.27388e-06
StLNC1872	PGSC0003DMG400002789	PGSC0003DMT400007215	1451	ABC transporter family protein	0.973584	9.61271e-06
StLNC2818	PGSC0003DMG402025354	PGSC0003DMT400065237	1443	DNA-directed RNA polymerase	0.972753	1.07055e-05
StLNC0594	PGSC0003DMG400002789	PGSC0003DMT400007215	1441	ABC transporter family protein	0.97248	1.10818e-05
StLNC2727	PGSC0003DMG400010843	PGSC0003DMT400028112	1436	Cellulose synthase CslE	0.97171	1.21973e-05
StLNC0210	PGSC0003DMG400008308	PGSC0003DMT400021420	1436	DNA replication licensing factor MCM3	0.971368	1.27162e-05
StLNC1965	PGSC0003DMG400021581	PGSC0003DMT400055564	1431	Conserved gene of unknown function	0.970576	1.39799e-05
StLNC2842	PGSC0003DMG400021581	PGSC0003DMT400055564	1426	Conserved gene of unknown function	0.970504	1.40997e-05
StLNC0485	PGSC0003DMG400030782	PGSC0003DMT400079095	1424	Conserved gene of unknown function	0.970419	1.42412e-05
StLNC0884	PGSC0003DMG400034548	PGSC0003DMT400084977	1420	Conserved gene of unknown function	0.969437	1.59493e-05
StLNC0760	PGSC0003DMG400017190	PGSC0003DMT400044259	1416	1-aminocyclopropane-1-carboxylate oxidase homolog	0.969368	1.60757e-05
StLNC0415	PGSC0003DMG400041505	PGSC0003DMT400091934	1409	Microfilarial sheath protein	0.969256	1.62805e-05
StLNC0533	PGSC0003DMG404006439	PGSC0003DMT400016484	1405	Aldo/keto reductase	0.968945	1.68587e-05
StLNC2159	PGSC0003DMG400026655	PGSC0003DMT400068527	1401	Binding protein	0.968581	1.75533e-05
StLNC0509	PGSC0003DMG400025962	PGSC0003DMT400066774	1398	Oxidoreductase	0.968556	1.76027e-05
StLNC0954	PGSC0003DMG400027267	PGSC0003DMT400070152	1395	Conserved gene of unknown function	0.968398	1.79111e-05
StLNC0177	PGSC0003DMG400009672	PGSC0003DMT400025043	1392	Pom14 protein	0.968383	1.79398e-05
StLNC1453	PGSC0003DMG400020122	PGSC0003DMT400051852	1387	Circadian clock coupling factor ZGT	0.968141	1.84211e-05
StLNC1105	PGSC0003DMG400036408	PGSC0003DMT400086837	1386	Gene of unknown function	0.968061	1.8582e-05
StLNC2206	PGSC0003DMG400036408	PGSC0003DMT400086837	1386	Gene of unknown function	0.967976	1.87548e-05
StLNC1232	PGSC0003DMG400036408	PGSC0003DMT400086837	1385	Gene of unknown function	0.967942	1.88238e-05
StLNC2400	PGSC0003DMG400036408	PGSC0003DMT400086837	1384	Gene of unknown function	0.967522	1.96932e-05
StLNC1445	PGSC0003DMG400036408	PGSC0003DMT400086837	1384	Gene of unknown function	0.966992	2.08305e-05
StLNC0362	PGSC0003DMG400018848	PGSC0003DMT400048522	1378	Gene of unknown function	0.965119	2.52227e-05
StLNC0162	PGSC0003DMG400037676	PGSC0003DMT400088105	1377	Disease resistance protein	0.964925	2.57102e-05
StLNC2332	PGSC0003DMG400006250	PGSC0003DMT400015982	1375	Gene of unknown function	0.964015	2.8098e-05
StLNC1015	PGSC0003DMG400019372	PGSC0003DMT400049859	1372	Phytoene synthase 2, chloroplastic	0.963587	2.92733e-05
StLNC0700	PGSC0003DMG400020122	PGSC0003DMT400051852	1367	Circadian clock coupling factor ZGT	0.962764	3.16284e-05
StLNC2517	PGSC0003DMG400033118	PGSC0003DMT400083205	1362	Gene of unknown function	0.962442	3.25865e-05
StLNC2216	PGSC0003DMG402028319	PGSC0003DMT400072783	1358	Alpha/beta hydrolase	0.962173	3.3402e-05
StLNC2720	PGSC0003DMG400009148	PGSC0003DMT400023636	1348	DNA binding protein	0.961599	3.51892e-05
StLNC1708	PGSC0003DMG400021581	PGSC0003DMT400055564	1340	Conserved gene of unknown function	0.959748	4.14166e-05
StLNC0663	PGSC0003DMG401011139	PGSC0003DMT400028935	1340	26S proteasome regulatory subunit p27	0.959182	4.34662e-05
StLNC2396	PGSC0003DMG400016710	PGSC0003DMT400043080	1338	Conserved gene of unknown function	0.957524	4.9885e-05
StLNC0355	PGSC0003DMG400015681	PGSC0003DMT400040528	1334	Resistance gene	0.957511	4.99372e-05
StLNC1645	PGSC0003DMG400024560	PGSC0003DMT400063143	1317	Formin 20	0.957423	5.02976e-05
StLNC1204	PGSC0003DMG400020966	PGSC0003DMT400054060	1299	Gene of unknown function	0.957267	5.09345e-05
StLNC2646	PGSC0003DMG400020425	PGSC0003DMT400052619	1275	14-3-3 protein 9	0.956874	5.25734e-05
StLNC0659	PGSC0003DMG400011091	PGSC0003DMT400028807	1269	Glycosyltransferase	0.9568	5.28871e-05
StLNC1712	PGSC0003DMG400024743	PGSC0003DMT400063662	1269	Plastid CUL1	0.956112	5.5856e-05
StLNC2539	PGSC0003DMG400038994	PGSC0003DMT400089423	1268	Gene of unknown function	0.955214	5.99084e-05
StLNC0564	PGSC0003DMG400035389	PGSC0003DMT400085818	1268	ARO1 1	0.954235	6.45526e-05
StLNC0650	PGSC0003DMG402019957	PGSC0003DMT400051382	1266	Pentatricopeptide repeat-containing protein	0.952406	7.39071e-05
StLNC1224	PGSC0003DMG400011542	PGSC0003DMT400030126	1265	Serine carboxypeptidase	0.951785	7.72905e-05
StLNC1442	PGSC0003DMG400008942	PGSC0003DMT400023090	1259	Invertase	0.951768	7.73887e-05
StLNC0315	PGSC0003DMG404006439	PGSC0003DMT400016484	1259	Aldo/keto reductase	0.951334	7.98183e-05
StLNC1521	PGSC0003DMG400035665	PGSC0003DMT400086094	1256	Cytochrome P450	0.950945	8.20387e-05
StLNC2585	PGSC0003DMG400030273	PGSC0003DMT400077828	1244	Conserved gene of unknown function	0.950799	8.28843e-05
StLNC1241	PGSC0003DMG400008284	PGSC0003DMT400021361	1243	60S ribosomal protein L18a, plant	0.950279	8.5952e-05
StLNC1998	PGSC0003DMG400006255	PGSC0003DMT400015994	1242	Verticillium wilt disease resistance protein	0.959099	4.37735e-05
StLNC1940	PGSC0003DMG400011091	PGSC0003DMT400028807	1239	Glycosyltransferase	0.955654	5.78949e-05
StLNC2465	PGSC0003DMG401012933	PGSC0003DMT400033672	1237	Gene of unknown function	0.979553	3.94515e-06
StLNC0388	PGSC0003DMG400021383	PGSC0003DMT400055111	1235	Oxidoreductase, 2OG-Fe(II) oxygenase family protein	0.9787	4.54798e-06
StLNC0722	PGSC0003DMG400007899	PGSC0003DMT400020443	1234	CBL-interacting protein kinase 7	0.976484	6.41726e-06
StLNC2503	PGSC0003DMG400018242	PGSC0003DMT400046967	1232	Type I MADS box transcription factor	0.974831	8.12633e-06
StLNC0305	PGSC0003DMG400018897	PGSC0003DMT400048642	1228	Gene of unknown function	0.972461	1.11094e-05
StLNC0960	PGSC0003DMG400043546	PGSC0003DMT400093975	1227	Conserved gene of unknown function	0.969743	1.54025e-05
StLNC0331	PGSC0003DMG400022472	PGSC0003DMT400057864	1223	Conserved gene of unknown function	0.966237	2.25288e-05
StLNC2479	PGSC0003DMG400031506	PGSC0003DMT400080898	1219	Gag-pol protein	0.965801	2.35524e-05
StLNC1816	PGSC0003DMG400015675	PGSC0003DMT400040488	1216	Lyase	0.965748	2.36811e-05
StLNC2833	PGSC0003DMG400041061	PGSC0003DMT400091490	1212	Gene of unknown function	0.964628	2.64735e-05
StLNC0547	PGSC0003DMG400030273	PGSC0003DMT400077828	1202	Conserved gene of unknown function	0.959768	4.13458e-05
StLNC1518	PGSC0003DMG400021993	PGSC0003DMT400056565	1202	BRASSINOSTEROID INSENSITIVE 1-associated receptor kinase 1	0.956404	5.45811e-05
StLNC1307	PGSC0003DMG400042565	PGSC0003DMT400092994	1196	Gene of unknown function	0.95536	5.92321e-05
StLNC0998	PGSC0003DMG400025028	PGSC0003DMT400064422	1191	Myosin VIII-2	0.954989	6.0951e-05
StLNC1284	PGSC0003DMG400008615	PGSC0003DMT400022199	1188	Pentatricopeptide repeat-containing protein	0.954375	6.38716e-05
StLNC2708	PGSC0003DMG400009778	PGSC0003DMT400025332	1186	Gene of unknown function	0.954237	6.45445e-05
StLNC0484	PGSC0003DMG400009778	PGSC0003DMT400025332	1186	Gene of unknown function	0.953538	6.80132e-05
StLNC1904	PGSC0003DMG400010458	PGSC0003DMT400027113	1184	Pentatricopeptide repeat-containing protein	0.952144	7.53226e-05
StLNC0667	PGSC0003DMG400007899	PGSC0003DMT400020443	1166	CBL-interacting protein kinase 7	0.95046	8.48769e-05
StLNC0232	PGSC0003DMG402000860	PGSC0003DMT400002245	1166	Serine carboxypeptidase-like enzyme	0.95039	8.52916e-05
StLNC0718	PGSC0003DMG400007899	PGSC0003DMT400020443	1162	CBL-interacting protein kinase 7	0.968215	1.82723e-05
StLNC0846	PGSC0003DMG400007899	PGSC0003DMT400020443	1157	CBL-interacting protein kinase 7	0.979958	3.67986e-06
StLNC0403	PGSC0003DMG400007899	PGSC0003DMT400020443	1157	CBL-interacting protein kinase 7	0.978301	4.85143e-06
StLNC0290	PGSC0003DMG400007899	PGSC0003DMT400020443	1157	CBL-interacting protein kinase 7	0.977873	5.19244e-06
StLNC1951	PGSC0003DMG404006439	PGSC0003DMT400016484	1153	Aldo/keto reductase	0.977802	5.25101e-06
StLNC1860	PGSC0003DMG404006439	PGSC0003DMT400016484	1153	Aldo/keto reductase	0.976905	6.02673e-06
StLNC0203	PGSC0003DMG400025186	PGSC0003DMT400064863	1153	Minor allergen Alt a	0.976842	6.0836e-06
StLNC0494	PGSC0003DMG400032822	PGSC0003DMT400082802	1144	Gene of unknown function	0.976267	6.62544e-06
StLNC0610	PGSC0003DMG400019669	PGSC0003DMT400050640	1135	Potato resistance I2GA-SH23-3	0.975651	7.2431e-06
StLNC1331	PGSC0003DMG400036329	PGSC0003DMT400086758	1135	Gene of unknown function	0.975459	7.44334e-06
StLNC1595	PGSC0003DMG400001565	PGSC0003DMT400003980	1135	HB2 homeodomain protein	0.974717	8.25548e-06
StLNC2622	PGSC0003DMG400038086	PGSC0003DMT400088515	1126	Conserved gene of unknown function	0.973257	1.00332e-05
StLNC0487	PGSC0003DMG402008383	PGSC0003DMT400021607	1103	Nbs-lrr resistance protein	0.973103	1.02346e-05
StLNC2756	PGSC0003DMG400014970	PGSC0003DMT400038733	1098	Conserved gene of unknown function	0.972687	1.07951e-05
StLNC0681	PGSC0003DMG400024917	PGSC0003DMT400064124	1098	Bromodomain-containing protein	0.971997	1.17729e-05
StLNC2696	PGSC0003DMG400021581	PGSC0003DMT400055564	1094	Conserved gene of unknown function	0.97103	1.32455e-05
StLNC2298	PGSC0003DMG401024894	PGSC0003DMT400064047	1094	Conserved gene of unknown function	0.970372	1.43196e-05
StLNC0712	PGSC0003DMG400014149	PGSC0003DMT400036691	1093	Multidrug Resistance associated Protein 1	0.969677	1.55195e-05
StLNC2378	PGSC0003DMG400008487	PGSC0003DMT400021868	1090	Major latex	0.968607	1.75034e-05
StLNC0839	PGSC0003DMG400021581	PGSC0003DMT400055564	1086	Conserved gene of unknown function	0.96837	1.79653e-05
StLNC2767	PGSC0003DMG400012659	PGSC0003DMT400032959	1080	Serine/threonine-protein kinase HT1	0.967741	1.92351e-05
StLNC0452	PGSC0003DMG400006898	PGSC0003DMT400017760	1072	Ulp1 protease family, C-terminal catalytic domain containing protein	0.966927	2.09716e-05
StLNC0121	PGSC0003DMG400032270	PGSC0003DMT400082119	1069	Pentatricopeptide repeat-containing protein	0.966747	2.13716e-05
StLNC0141	PGSC0003DMG400032502	PGSC0003DMT400082374	1047	Gene of unknown function	0.966508	2.19089e-05
StLNC1020	PGSC0003DMG400015854	PGSC0003DMT400040979	1045	Gene of unknown function	0.966441	2.20601e-05
StLNC1763	PGSC0003DMG402025733	PGSC0003DMT400066100	1037	Gene of unknown function	0.96628	2.24294e-05
StLNC0383	PGSC0003DMG400008694	PGSC0003DMT400022427	1028	Conserved gene of unknown function	0.965888	2.33474e-05
StLNC2328	PGSC0003DMG400027818	PGSC0003DMT400071507	1026	Zinc finger protein	0.965458	2.43829e-05
StLNC0885	PGSC0003DMG400040684	PGSC0003DMT400091113	1024	Conserved gene of unknown function	0.964126	2.77981e-05
StLNC0671	PGSC0003DMG400020974	PGSC0003DMT400054079	1009	MuDR family transposase containing protein	0.962523	3.23442e-05
StLNC2246	PGSC0003DMG403008332	PGSC0003DMT400021476	1008	Mediator complex subunit SOH1	0.962458	3.25365e-05
StLNC1759	PGSC0003DMG400004701	PGSC0003DMT400011979	1004	Calmodulin-binding transcription activator (Camta), plants	0.962305	3.30006e-05
StLNC0785	PGSC0003DMG400000969	PGSC0003DMT400002543	994	Orf147a protein	0.961597	3.51946e-05
StLNC2186	PGSC0003DMG400011423	PGSC0003DMT400029702	993	Gb protein	0.961432	3.57205e-05
StLNC0549	PGSC0003DMG400006705	PGSC0003DMT400017187	990	BSD	0.96076	3.79215e-05
StLNC2177	PGSC0003DMG400019688	PGSC0003DMT400050689	988	SEN1	0.95993	4.07732e-05
StLNC1348	PGSC0003DMG400006705	PGSC0003DMT400017187	987	BSD	0.959691	4.16211e-05
StLNC2033	PGSC0003DMG400006705	PGSC0003DMT400017187	987	BSD	0.959566	4.20691e-05
StLNC2016	PGSC0003DMG400006705	PGSC0003DMT400017187	987	BSD	0.959514	4.2257e-05
StLNC0073	PGSC0003DMG400002982	PGSC0003DMT400007719	986	Potato resistance I2GA-SH23-1	0.95717	5.13352e-05
StLNC1035	PGSC0003DMG400028377	PGSC0003DMT400072941	977	14-3-3 protein Lil 1433-3	0.956297	5.50451e-05
StLNC0201	PGSC0003DMG400002258	PGSC0003DMT400005774	954	Zinc ion binding protein	0.953574	6.7832e-05
StLNC1209	PGSC0003DMG400003823	PGSC0003DMT400009766	933	WERBP-1 protein	0.953462	6.83983e-05
StLNC2801	PGSC0003DMG400041756	PGSC0003DMT400092185	933	Integrase core domain containing protein	0.953359	6.89252e-05
StLNC0862	PGSC0003DMG401031172	PGSC0003DMT400080052	913	PRA1 family protein F3	0.952987	7.08398e-05
StLNC0308	PGSC0003DMG400003484	PGSC0003DMT400008944	913	RNA-binding region-containing protein	0.95296	7.09784e-05
StLNC0356	PGSC0003DMG400030782	PGSC0003DMT400079095	912	Conserved gene of unknown function	0.952027	7.59622e-05
StLNC0793	PGSC0003DMG400008615	PGSC0003DMT400022199	911	Pentatricopeptide repeat-containing protein	0.951115	8.10634e-05
StLNC2507	PGSC0003DMG400027734	PGSC0003DMT400071312	897	UPF0497 membrane protein 3	0.950918	8.21954e-05
StLNC2366	PGSC0003DMG400002666	PGSC0003DMT400006867	894	Gene of unknown function	0.950852	8.25812e-05
StLNC2026	PGSC0003DMG400042565	PGSC0003DMT400092994	892	Gene of unknown function	0.950712	8.33952e-05
StLNC0344	PGSC0003DMG400006105	PGSC0003DMT400015640	890	Pentatricopeptide repeat-containing protein	0.950676	8.36044e-05
StLNC1416	PGSC0003DMG400031748	PGSC0003DMT400081218	888	Conserved gene of unknown function	0.950512	8.45649e-05
StLNC0642	PGSC0003DMG400027555	PGSC0003DMT400070850	887	Conserved gene of unknown function	0.959843	4.10783e-05
StLNC1943	PGSC0003DMG400000406	PGSC0003DMT400001073	876	Gene of unknown function	0.954893	6.14032e-05
StLNC0741	PGSC0003DMG400012667	PGSC0003DMT400032979	876	Peroxidase 57	0.952115	7.54824e-05
StLNC0003	PGSC0003DMG400043197	PGSC0003DMT400093626	864	Conserved gene of unknown function	0.967188	2.04036e-05
StLNC1918	PGSC0003DMG400017128	PGSC0003DMT400044129	863	Leucine-rich repeat resistance protein	0.962676	3.18877e-05
StLNC1849	PGSC0003DMG400030782	PGSC0003DMT400079095	858	Conserved gene of unknown function	0.957684	4.92384e-05
StLNC2648	PGSC0003DMG400030782	PGSC0003DMT400079095	858	Conserved gene of unknown function	0.953604	6.76803e-05
StLNC0337	PGSC0003DMG400025172	PGSC0003DMT400064813	856	Conserved gene of unknown function	0.972154	1.15447e-05
StLNC2079	PGSC0003DMG400028535	PGSC0003DMT400073455	850	Conserved gene of unknown function	0.951852	7.69235e-05
StLNC1064	PGSC0003DMG400020050	PGSC0003DMT400051632	849	Conserved gene of unknown function	0.950413	8.51548e-05
StLNC2257	PGSC0003DMG400035141	PGSC0003DMT400085570	845	Conserved gene of unknown function	0.974074	9.0075e-06
StLNC2099	PGSC0003DMG400012667	PGSC0003DMT400032979	838	Peroxidase 57	0.973096	1.02441e-05
StLNC1953	PGSC0003DMG400012667	PGSC0003DMT400032979	834	Peroxidase 57	0.970791	1.36282e-05
StLNC1414	PGSC0003DMG402004840	PGSC0003DMT400012353	830	Phosphatase	0.967842	1.90275e-05
StLNC1740	PGSC0003DMG400044001	PGSC0003DMT400094430	830	GATA transcription factor 29	0.966198	2.26192e-05
StLNC1825	PGSC0003DMG401014331	PGSC0003DMT400037170	810	F-box family protein	0.965462	2.43723e-05
StLNC0574	PGSC0003DMG400030958	PGSC0003DMT400079507	798	Zinc finger (B-box type) family protein	0.965198	2.50241e-05
StLNC1968	PGSC0003DMG400029011	PGSC0003DMT400074622	797	Gene of unknown function	0.962527	3.23308e-05
StLNC1060	PGSC0003DMG400029011	PGSC0003DMT400074622	797	Gene of unknown function	0.959138	4.36307e-05
StLNC0001	PGSC0003DMG400027734	PGSC0003DMT400071312	795	UPF0497 membrane protein 3	0.954321	6.41339e-05
StLNC0591	PGSC0003DMG400030782	PGSC0003DMT400079095	792	Conserved gene of unknown function	0.963938	2.83053e-05
StLNC2602	PGSC0003DMG400021591	PGSC0003DMT400055595	791	Glycerol-3-phosphate transporter	0.953443	6.84943e-05
StLNC0185	PGSC0003DMG400021547	PGSC0003DMT400055484	790	Ethylene signaling protein	0.973612	9.57789e-06
StLNC0263	PGSC0003DMG400021547	PGSC0003DMT400055484	780	Ethylene signaling protein	0.967232	2.03101e-05
StLNC0524	PGSC0003DMG400015308	PGSC0003DMT400039562	779	Conserved gene of unknown function	0.958108	4.75542e-05
StLNC1215	PGSC0003DMG400045521	PGSC0003DMT400095950	777	F-box family protein	0.952107	7.55266e-05
StLNC2352	PGSC0003DMG400045521	PGSC0003DMT400095950	777	F-box family protein	0.966804	2.12444e-05
StLNC2344	PGSC0003DMG400018660	PGSC0003DMT400048026	777	Dimethylaniline monooxygenase	0.975292	7.62063e-06
StLNC2004	PGSC0003DMG400018660	PGSC0003DMT400048026	777	Dimethylaniline monooxygenase	0.975005	7.93324e-06
StLNC0174	PGSC0003DMG400024913	PGSC0003DMT400064112	770	Coatomer delta subunit	0.974989	7.94989e-06
StLNC2329	PGSC0003DMG400013242	PGSC0003DMT400034441	768	Coiled-coil domain-containing protein	0.971798	1.2066e-05
StLNC2021	PGSC0003DMG400027760	PGSC0003DMT400071350	758	Gene of unknown function	0.969526	1.57889e-05
StLNC1317	PGSC0003DMG400042898	PGSC0003DMT400093327	756	Gene of unknown function	0.96929	1.62166e-05
StLNC0423	PGSC0003DMG400025620	PGSC0003DMT400065820	752	Breast carcinoma amplified sequence	0.967372	2.00104e-05
StLNC1859	PGSC0003DMG400027432	PGSC0003DMT400070578	746	D2/4-type cyclin	0.951453	7.91434e-05
StLNC1073	PGSC0003DMG400024274	PGSC0003DMT400062367	746	Cytochrome P450 monooxygenase	0.96497	2.55969e-05
StLNC1752	PGSC0003DMG400004962	PGSC0003DMT400012732	743	Alpha-tubulin	0.959551	4.21239e-05
StLNC0363	PGSC0003DMG400030782	PGSC0003DMT400079095	738	Conserved gene of unknown function	0.957238	5.10571e-05
StLNC0321	PGSC0003DMG400030782	PGSC0003DMT400079095	738	Conserved gene of unknown function	0.95634	5.4859e-05
StLNC0666	PGSC0003DMG400008150	PGSC0003DMT400021057	736	Nucleic acid binding protein	0.968324	1.80566e-05
StLNC1313	PGSC0003DMG400025596	PGSC0003DMT400065755	732	BRASSINOSTEROID INSENSITIVE 1-associated receptor kinase 1	0.960554	3.86161e-05
StLNC1147	PGSC0003DMG400004010	PGSC0003DMT400010250	728	Conserved gene of unknown function	0.959472	4.24061e-05
StLNC0677	PGSC0003DMG400024837	PGSC0003DMT400063901	724	DNAJ heat shock N-terminal domain-containing protein	0.957189	5.12594e-05
StLNC2531	PGSC0003DMG400030782	PGSC0003DMT400079095	723	Conserved gene of unknown function	0.951585	7.84027e-05
StLNC1046	PGSC0003DMG400025596	PGSC0003DMT400065755	723	BRASSINOSTEROID INSENSITIVE 1-associated receptor kinase 1	0.979576	3.93005e-06
StLNC1411	PGSC0003DMG400002427	PGSC0003DMT400006232	715	Bacterial spot disease resistance protein 4	0.978604	4.62017e-06
StLNC1720	PGSC0003DMG404008678	PGSC0003DMT400022377	710	Protein kinase	0.978003	5.08761e-06
StLNC2647	PGSC0003DMG400017065	PGSC0003DMT400043974	705	Disease resistance protein RGA1	0.971528	1.24719e-05
StLNC2307	PGSC0003DMG400035518	PGSC0003DMT400085947	705	Conserved gene of unknown function	0.967062	2.06761e-05
StLNC2010	PGSC0003DMG400022129	PGSC0003DMT400056904	700	Pentatricopeptide repeat-containing protein	0.964868	2.5857e-05
StLNC2361	PGSC0003DMG400024837	PGSC0003DMT400063901	696	DNAJ heat shock N-terminal domain-containing protein	0.963298	3.0085e-05
StLNC0627	PGSC0003DMG400005200	PGSC0003DMT400013327	696	Cyclase/dehydrase	0.963008	3.0918e-05
StLNC2134	PGSC0003DMG400019414	PGSC0003DMT400049954	695	Omega-6 fatty acid desaturase, chloroplastic	0.95919	4.34366e-05
StLNC1945	PGSC0003DMG400008615	PGSC0003DMT400022199	694	Pentatricopeptide repeat-containing protein	0.977048	5.89745e-06
StLNC1787	PGSC0003DMG400016437	PGSC0003DMT400042390	686	Conserved gene of unknown function	0.976989	5.95052e-06
StLNC0477	PGSC0003DMG400021565	PGSC0003DMT400055533	685	SAUR family protein	0.975139	7.78546e-06
StLNC1229	PGSC0003DMG400021134	PGSC0003DMT400054452	682	Gamma-soluble nsf attachment protein	0.970754	1.36885e-05
StLNC1276	PGSC0003DMG400024878	PGSC0003DMT400064005	675	Zinc finger family protein	0.951206	8.05443e-05
StLNC2612	PGSC0003DMG400015828	PGSC0003DMT400040921	672	ERF transcription factor 5	0.97338	9.87297e-06
StLNC2416	PGSC0003DMG400005200	PGSC0003DMT400013327	668	Cyclase/dehydrase	0.968298	1.81078e-05
StLNC2718	PGSC0003DMG400005200	PGSC0003DMT400013327	666	Cyclase/dehydrase	0.966388	2.21821e-05
StLNC1774	PGSC0003DMG400021134	PGSC0003DMT400054452	656	Gamma-soluble nsf attachment protein	0.964413	2.70366e-05
StLNC0501	PGSC0003DMG402022350	PGSC0003DMT400057549	656	Zinc finger, RING-type	0.959593	4.19717e-05
StLNC0292	PGSC0003DMG400013571	PGSC0003DMT400035319	652	Microtubule-associated protein TORTIFOLIA1	0.955831	5.71024e-05
StLNC0953	PGSC0003DMG400024713	PGSC0003DMT400063561	651	Conserved gene of unknown function	0.954653	6.25391e-05
StLNC1484	PGSC0003DMG400015511	PGSC0003DMT400040097	642	Conserved gene of unknown function	0.953513	6.81384e-05
StLNC2688	PGSC0003DMG400009839	PGSC0003DMT400025486	641	Gene of unknown function	0.952666	7.25225e-05
StLNC2133	PGSC0003DMG402014923	PGSC0003DMT400038634	641	Gene of unknown function	0.950915	8.22159e-05
StLNC2830	PGSC0003DMG400029801	PGSC0003DMT400076639	637	Ubiquitin-protein ligase	0.976203	6.68719e-06
StLNC0312	PGSC0003DMG400017319	PGSC0003DMT400044621	625	CYP72A56	0.972821	1.0612e-05
StLNC0766	PGSC0003DMG400003097	PGSC0003DMT400008016	625	Flavonol synthase/flavanone 3-hydroxylase	0.963166	3.04603e-05
StLNC1179	PGSC0003DMG400041458	PGSC0003DMT400091887	623	Leucine-rich repeat containing protein	0.977568	5.44619e-06
StLNC1196	PGSC0003DMG400025620	PGSC0003DMT400065820	622	Breast carcinoma amplified sequence	0.966458	2.20223e-05
StLNC1113	PGSC0003DMG400044001	PGSC0003DMT400094430	622	GATA transcription factor 29	0.95922	4.33273e-05
StLNC1719	PGSC0003DMG400008695	PGSC0003DMT400022437	619	Gene of unknown function	0.958659	4.54244e-05
StLNC1743	PGSC0003DMG400021414	PGSC0003DMT400055176	618	N-acetyl-glutamate synthase	0.956066	5.60593e-05
StLNC0286	PGSC0003DMG400022496	PGSC0003DMT400057924	616	60S ribosome subunit biogenesis protein NIP7	0.955582	5.8222e-05
StLNC2582	PGSC0003DMG400027653	PGSC0003DMT400071114	608	Bystin	0.953553	6.7938e-05
StLNC0964	PGSC0003DMG400004142	PGSC0003DMT400010608	605	Gene of unknown function	0.962638	3.20018e-05
StLNC1726	PGSC0003DMG400014149	PGSC0003DMT400036691	599	Multidrug Resistance associated Protein 1	0.960697	3.81336e-05
StLNC1319	PGSC0003DMG400019400	PGSC0003DMT400049919	596	Conserved gene of unknown function	0.953911	6.61455e-05
StLNC1335	PGSC0003DMG400030369	PGSC0003DMT400078075	595	Pyruvate decarboxylase isozyme 2	0.953724	6.70758e-05
StLNC0422	PGSC0003DMG402022351	PGSC0003DMT400057559	581	Gene of unknown function	0.955654	5.78958e-05
StLNC0623	PGSC0003DMG400027034	PGSC0003DMT400069542	580	Conserved gene of unknown function	0.952758	7.20366e-05
StLNC0345	PGSC0003DMG400001955	PGSC0003DMT400004934	576	Pentatricopeptide repeat-containing protein, mitochondrial	0.968865	1.70095e-05
StLNC0819	PGSC0003DMG400018983	PGSC0003DMT400048853	575	Gene of unknown function	0.950231	8.62344e-05
StLNC1360	PGSC0003DMG400030150	PGSC0003DMT400077533	573	Conserved gene of unknown function	0.977563	5.4498e-06
StLNC2068	PGSC0003DMG400002001	PGSC0003DMT400005067	573	Conserved gene of unknown function	0.977067	5.88096e-06
StLNC2469	PGSC0003DMG401009242	PGSC0003DMT400023903	567	I-box binding factor	0.971228	1.29335e-05
StLNC0026	PGSC0003DMG400021323	PGSC0003DMT400054945	556	BEL29 protein	0.95602	5.62613e-05
StLNC1112	PGSC0003DMG400006698	PGSC0003DMT400017163	554	F-box protein 7	0.968993	1.67671e-05
StLNC0228	PGSC0003DMG400002908	PGSC0003DMT400007529	550	Conserved gene of unknown function	0.979077	4.27391e-06
StLNC1580	PGSC0003DMG402005959	PGSC0003DMT400015272	547	WD-repeat protein	0.970358	1.43426e-05
StLNC2428	PGSC0003DMG400027427	PGSC0003DMT400070566	545	Fibronectin type III domain containing protein	0.96692	2.09872e-05
StLNC0196	PGSC0003DMG402029824	PGSC0003DMT400076694	543	UDP-glucosyltransferase	0.960549	3.86351e-05
StLNC0382	PGSC0003DMG402029824	PGSC0003DMT400076694	539	UDP-glucosyltransferase	0.957956	4.81521e-05
StLNC1862	PGSC0003DMG400037113	PGSC0003DMT400087542	535	NB-ARC domain containing protein	0.957885	4.84357e-05
StLNC1559	PGSC0003DMG402029824	PGSC0003DMT400076694	526	UDP-glucosyltransferase	0.957799	4.87772e-05
StLNC0519	PGSC0003DMG400010854	PGSC0003DMT400028133	525	Gag-pol polyprotein	0.95759	4.96161e-05
StLNC0108	PGSC0003DMG400018957	PGSC0003DMT400048779	525	Conserved gene of unknown function	0.957413	5.03369e-05
StLNC0224	PGSC0003DMG400002670	PGSC0003DMT400006881	524	Conserved gene of unknown function	0.955767	5.73903e-05
StLNC2478	PGSC0003DMG400031053	PGSC0003DMT400079748	522	Tubulin-specific chaperone B	0.955165	6.01319e-05
StLNC2592	PGSC0003DMG400027653	PGSC0003DMT400071114	520	Bystin	0.953165	6.99179e-05
StLNC0994	PGSC0003DMG400023779	PGSC0003DMT400061120	518	Gene of unknown function	0.965874	2.33791e-05
StLNC1573	PGSC0003DMG402031484	PGSC0003DMT400080852	510	Gene of unknown function	0.963261	3.01914e-05
StLNC1514	PGSC0003DMG400018723	PGSC0003DMT400048203	508	Gene of unknown function	0.96684	2.11641e-05
StLNC1725	PGSC0003DMG400037113	PGSC0003DMT400087542	506	NB-ARC domain containing protein	0.952569	7.30383e-05
StLNC0548	PGSC0003DMG400019686	PGSC0003DMT400050687	503	Potato resistance I2GA-SH23-1	0.971722	1.21783e-05
StLNC2762	PGSC0003DMG400043854	PGSC0003DMT400094283	500	Gene of unknown function	0.968181	1.83419e-05
StLNC1771	PGSC0003DMG400007851	PGSC0003DMT400020306	495	Gene of unknown function	0.965363	2.46164e-05
StLNC1555	PGSC0003DMG400011809	PGSC0003DMT400030826	492	Disease resistance protein BS2	0.964613	2.65138e-05
StLNC0157	PGSC0003DMG400010069	PGSC0003DMT400026113	491	24 kDa seed maturation protein	0.963393	2.98176e-05
StLNC1684	PGSC0003DMG400026522	PGSC0003DMT400068219	487	Avr9/Cf-9 rapidly elicited protein 141	0.96249	3.24412e-05
StLNC2743	PGSC0003DMG400045775	PGSC0003DMT400096204	480	Inositol polyphosphate kinase	0.962165	3.34255e-05
StLNC2514	PGSC0003DMG400024123	PGSC0003DMT400061983	479	Gene of unknown function	0.960758	3.79288e-05
StLNC2474	PGSC0003DMG400009893	PGSC0003DMT400025613	474	RNA helicase	0.959122	4.36866e-05
StLNC2475	PGSC0003DMG400009893	PGSC0003DMT400025613	474	RNA helicase	0.958041	4.78146e-05
StLNC0252	PGSC0003DMG400018281	PGSC0003DMT400047082	473	Anaphase-promoting complex subunit 11	0.956423	5.4498e-05
StLNC0512	PGSC0003DMG400029352	PGSC0003DMT400075471	473	Trans-2-enoyl CoA reductase	0.955804	5.72211e-05
StLNC0999	PGSC0003DMG400021293	PGSC0003DMT400054850	468	Gene of unknown function	0.955642	5.79488e-05
StLNC1311	PGSC0003DMG400010069	PGSC0003DMT400026113	466	24 kDa seed maturation protein	0.952624	7.27476e-05
StLNC0005	PGSC0003DMG400009893	PGSC0003DMT400025613	465	RNA helicase	0.952303	7.44652e-05
StLNC0869	PGSC0003DMG400009893	PGSC0003DMT400025613	463	RNA helicase	0.950747	8.31907e-05
StLNC2845	PGSC0003DMG401002977	PGSC0003DMT400007696	463	Serine/threonine-protein kinase Nek4	0.979012	4.32046e-06
StLNC2019	PGSC0003DMG400030238	PGSC0003DMT400077727	462	CC-NBS-LRR protein	0.968076	1.85518e-05
StLNC0442	PGSC0003DMG400012089	PGSC0003DMT400031525	457	Type I serine protease inhibitor	0.960772	3.78838e-05
StLNC0828	PGSC0003DMG400013935	PGSC0003DMT400036205	456	Inosine-uridine preferring nucleoside hydrolase	0.954571	6.29324e-05
StLNC2168	PGSC0003DMG400011203	PGSC0003DMT400029126	455	Conserved gene of unknown function	0.960959	3.72629e-05
StLNC0237	PGSC0003DMG400009741	PGSC0003DMT400025204	439	Phosphatidic acid phosphatase	0.962543	3.22825e-05
StLNC1278	PGSC0003DMG400025406	PGSC0003DMT400065363	435	Conserved gene of unknown function	0.957264	5.09491e-05
StLNC2215	PGSC0003DMG400033628	PGSC0003DMT400083853	433	CID5/IPD1	0.953536	6.80245e-05
StLNC1074	PGSC0003DMG400016117	PGSC0003DMT400041582	427	EMB2757	0.975035	7.90017e-06
StLNC1377	PGSC0003DMG400019414	PGSC0003DMT400049954	425	Omega-6 fatty acid desaturase, chloroplastic	0.972156	1.15419e-05
StLNC0093	PGSC0003DMG400002359	PGSC0003DMT400006075	418	ATEXO70C1	0.971978	1.18004e-05
StLNC2630	PGSC0003DMG400037226	PGSC0003DMT400087655	412	Glutathione S-transferase omega	0.968995	1.67636e-05
StLNC2463	PGSC0003DMG400018422	PGSC0003DMT400047403	407	Sulfate/bicarbonate/oxalate exchanger and transporter sat-1	0.968664	1.73932e-05
StLNC2338	PGSC0003DMG401029181	PGSC0003DMT400075025	407	Conserved gene of unknown function	0.965409	2.45025e-05
StLNC0586	PGSC0003DMG400003406	PGSC0003DMT400008766	401	Kinase	0.95795	4.8177e-05
StLNC1902	PGSC0003DMG400014614	PGSC0003DMT400037882	400	Conserved gene of unknown function	0.955913	5.67361e-05
StLNC1672	PGSC0003DMG400009893	PGSC0003DMT400025613	395	RNA helicase	0.953644	6.74805e-05
StLNC2613	PGSC0003DMG400026434	PGSC0003DMT400067985	391	Conserved gene of unknown function	0.95292	7.11892e-05
StLNC2251	PGSC0003DMG400009168	PGSC0003DMT400023703	391	Indole-3-acetic acid-induced protein ARG7	0.975132	7.79389e-06
StLNC0951	PGSC0003DMG400020882	PGSC0003DMT400053837	387	Gene of unknown function	0.974781	8.18307e-06
StLNC0941	PGSC0003DMG400018607	PGSC0003DMT400047874	386	Tetratricopeptide-like helical	0.972623	1.0884e-05
StLNC0180	PGSC0003DMG400028560	PGSC0003DMT400073505	385	Receptor protein kinase	0.967041	2.0723e-05
StLNC1603	PGSC0003DMG400005694	PGSC0003DMT400014547	372	Conserved gene of unknown function	0.963765	2.8781e-05
StLNC0394	PGSC0003DMG402001548	PGSC0003DMT400003923	371	Triacylglycerol lipase	0.9609	3.74562e-05
StLNC2244	PGSC0003DMG400025383	PGSC0003DMT400065295	369	CC-NBS-LRR protein	0.960835	3.7674e-05
StLNC2323	PGSC0003DMG400024076	PGSC0003DMT400061876	369	Conserved gene of unknown function	0.958005	4.79566e-05
StLNC1101	PGSC0003DMG400025169	PGSC0003DMT400064797	368	Gene of unknown function	0.957716	4.91099e-05
StLNC1793	PGSC0003DMG400024560	PGSC0003DMT400063143	367	Formin 20	0.953488	6.8265e-05
StLNC0179	PGSC0003DMG400032195	PGSC0003DMT400081999	365	Nse1 non-SMC component of SMC5-6 complex family protein	0.951902	7.66451e-05
StLNC0899	PGSC0003DMG400025186	PGSC0003DMT400064863	365	Minor allergen Alt a	0.974923	8.02323e-06
StLNC2544	PGSC0003DMG400010936	PGSC0003DMT400028377	365	Gene of unknown function	0.972328	1.12967e-05
StLNC0517	PGSC0003DMG400010936	PGSC0003DMT400028377	365	Gene of unknown function	0.97163	1.2317e-05
StLNC2184	PGSC0003DMG400010936	PGSC0003DMT400028377	365	Gene of unknown function	0.968158	1.83874e-05
StLNC1836	PGSC0003DMG400030877	PGSC0003DMT400079328	364	Transcription factor	0.966513	2.18976e-05
StLNC0076	PGSC0003DMG400008416	PGSC0003DMT400021696	364	Histidinol-phosphate aminotransferase, chloroplastic	0.963308	3.00572e-05
StLNC2654	PGSC0003DMG400025186	PGSC0003DMT400064863	363	Minor allergen Alt a	0.963101	3.06482e-05
StLNC1884	PGSC0003DMG400025186	PGSC0003DMT400064863	363	Minor allergen Alt a	0.962315	3.29703e-05
StLNC0563	PGSC0003DMG400033029	PGSC0003DMT400083027	362	Enhanced disease susceptibility 1 protein	0.957063	5.17814e-05
StLNC1246	PGSC0003DMG400019018	PGSC0003DMT400048942	359	Nuclear transcription factor, X-box binding	0.952201	7.50165e-05
StLNC0805	PGSC0003DMG400004810	PGSC0003DMT400012257	358	Pepsin A	0.952077	7.56893e-05
StLNC1141	PGSC0003DMG400000323	PGSC0003DMT400000859	353	Conserved gene of unknown function	0.951269	8.0184e-05
StLNC2087	PGSC0003DMG400025596	PGSC0003DMT400065755	346	BRASSINOSTEROID INSENSITIVE 1-associated receptor kinase 1	0.974923	8.02331e-06
StLNC2711	PGSC0003DMG401026992	PGSC0003DMT400069427	339	Integrator complex subunit	0.972815	1.06213e-05
StLNC0979	PGSC0003DMG400017502	PGSC0003DMT400045124	330	Gene of unknown function	0.963157	3.04877e-05
StLNC0932	PGSC0003DMG402008383	PGSC0003DMT400021607	330	Nbs-lrr resistance protein	0.952945	7.10598e-05
StLNC0346	PGSC0003DMG400014104	PGSC0003DMT400036586	328	Patatin-2-Kuras 4	0.963314	3.00403e-05
StLNC1356	PGSC0003DMG400026014	PGSC0003DMT400066917	328	Phosphatidate cytidylyltransferase	0.954372	6.38877e-05
StLNC2181	PGSC0003DMG400026014	PGSC0003DMT400066917	328	Phosphatidate cytidylyltransferase	0.974782	8.18139e-06
StLNC2218	PGSC0003DMG400010064	PGSC0003DMT400026090	322	Peroxidase 10	0.971615	1.23393e-05
StLNC1972	PGSC0003DMG400025172	PGSC0003DMT400064813	321	Conserved gene of unknown function	0.968115	1.84744e-05
StLNC1318	PGSC0003DMG400025186	PGSC0003DMT400064863	320	Minor allergen Alt a	0.967583	1.95651e-05
StLNC0282	PGSC0003DMG400025186	PGSC0003DMT400064863	319	Minor allergen Alt a	0.961485	3.55524e-05
StLNC2390	PGSC0003DMG400025186	PGSC0003DMT400064863	319	Minor allergen Alt a	0.958214	4.71392e-05
StLNC1984	PGSC0003DMG400025186	PGSC0003DMT400064863	319	Minor allergen Alt a	0.954265	6.44094e-05
StLNC0339	PGSC0003DMG400025186	PGSC0003DMT400064863	319	Minor allergen Alt a	0.953026	7.06364e-05
StLNC0605	PGSC0003DMG400017891	PGSC0003DMT400046096	318	Acireductone dioxygenase	0.975124	7.80251e-06
StLNC0227	PGSC0003DMG400010936	PGSC0003DMT400028377	314	Gene of unknown function	0.953871	6.63437e-05
StLNC2238	PGSC0003DMG400002663	PGSC0003DMT400006861	301	APO protein 3, mitochondrial	0.978462	4.72768e-06
StLNC2036	PGSC0003DMG400000039	PGSC0003DMT400000135	298	Pentatricopeptide repeat-containing protein	0.972419	1.1168e-05
StLNC1566	PGSC0003DMG400019348	PGSC0003DMT400049811	297	Ice binding protein	0.971628	1.232e-05
StLNC0160	PGSC0003DMG400028881	PGSC0003DMT400074299	296	WPP domain-interacting protein 1	0.963074	3.07264e-05
StLNC1202	PGSC0003DMG400000099	PGSC0003DMT400000295	296	Pentatricopeptide repeat-containing protein, mitochondrial	0.971123	1.30978e-05
StLNC2649	PGSC0003DMG400018242	PGSC0003DMT400046967	294	Type I MADS box transcription factor	0.979033	4.30536e-06
StLNC2627	PGSC0003DMG400003857	PGSC0003DMT400009839	292	Gene of unknown function	0.978951	4.3647e-06
StLNC1873	PGSC0003DMG400018242	PGSC0003DMT400046967	292	Type I MADS box transcription factor	0.977825	5.23178e-06
StLNC0590	PGSC0003DMG400018242	PGSC0003DMT400046967	291	Type I MADS box transcription factor	0.976481	6.41971e-06
StLNC1427	PGSC0003DMG400001340	PGSC0003DMT400003384	289	SPX domain-containing protein 4	0.976319	6.57475e-06
StLNC1974	PGSC0003DMG400025186	PGSC0003DMT400064863	288	Minor allergen Alt a	0.976174	6.71646e-06
StLNC1581	PGSC0003DMG400025186	PGSC0003DMT400064863	288	Minor allergen Alt a	0.971844	1.19977e-05
StLNC2112	PGSC0003DMG400010065	PGSC0003DMT400026093	288	MAP protein kinase	0.969009	1.67382e-05
StLNC2066	PGSC0003DMG400025186	PGSC0003DMT400064863	287	Minor allergen Alt a	0.965406	2.4511e-05
StLNC2189	PGSC0003DMG400025186	PGSC0003DMT400064863	287	Minor allergen Alt a	0.964207	2.75804e-05
StLNC0425	PGSC0003DMG400025186	PGSC0003DMT400064863	287	Minor allergen Alt a	0.961445	3.56815e-05
StLNC0474	PGSC0003DMG401024222	PGSC0003DMT400062254	286	Gene of unknown function	0.96087	3.75579e-05
StLNC0035	PGSC0003DMG400025186	PGSC0003DMT400064863	286	Minor allergen Alt a	0.960385	3.91918e-05
StLNC1469	PGSC0003DMG400025186	PGSC0003DMT400064863	286	Minor allergen Alt a	0.958223	4.71008e-05
StLNC2115	PGSC0003DMG400025186	PGSC0003DMT400064863	286	Minor allergen Alt a	0.977753	5.29141e-06
StLNC1927	PGSC0003DMG400025186	PGSC0003DMT400064863	286	Minor allergen Alt a	0.972948	1.04413e-05
StLNC2002	PGSC0003DMG400014669	PGSC0003DMT400038040	285	Gene of unknown function	0.970495	1.4114e-05
StLNC1214	PGSC0003DMG400018242	PGSC0003DMT400046967	284	Type I MADS box transcription factor	0.96943	1.59616e-05
StLNC1723	PGSC0003DMG400018242	PGSC0003DMT400046967	284	Type I MADS box transcription factor	0.960333	3.93721e-05
StLNC1383	PGSC0003DMG400000134	PGSC0003DMT400000380	283	Xylem serine proteinase 1	0.959608	4.19187e-05
StLNC1892	PGSC0003DMG400018242	PGSC0003DMT400046967	283	Type I MADS box transcription factor	0.959008	4.41119e-05
StLNC0200	PGSC0003DMG402030517	PGSC0003DMT400078381	282	Pentatricopeptide repeat-containing protein	0.956768	5.30211e-05
StLNC0016	PGSC0003DMG400025186	PGSC0003DMT400064863	282	Minor allergen Alt a	0.956549	5.39569e-05
StLNC1692	PGSC0003DMG400025186	PGSC0003DMT400064863	282	Minor allergen Alt a	0.953567	6.78653e-05
StLNC2212	PGSC0003DMG400025186	PGSC0003DMT400064863	282	Minor allergen Alt a	0.953514	6.81375e-05
StLNC1930	PGSC0003DMG400000656	PGSC0003DMT400001756	281	Conserved gene of unknown function	0.950538	8.44135e-05
StLNC0038	PGSC0003DMG400010705	PGSC0003DMT400027810	278	Ubiquitin-protein ligase	0.962484	3.2459e-05
StLNC1855	PGSC0003DMG400010419	PGSC0003DMT400027003	276	Retrotransposon gag protein	0.961825	3.44772e-05
StLNC0576	PGSC0003DMG402025764	PGSC0003DMT400066200	274	Gene of unknown function	0.958945	4.43445e-05
StLNC2760	PGSC0003DMG400001514	PGSC0003DMT400003820	274	Srpk	0.9577	4.91748e-05
StLNC0470	PGSC0003DMG400012747	PGSC0003DMT400033191	273	ATP binding protein	0.955769	5.73811e-05
StLNC2542	PGSC0003DMG400012544	PGSC0003DMT400032656	273	Gene of unknown function	0.954716	6.22396e-05
StLNC1673	PGSC0003DMG400025186	PGSC0003DMT400064863	271	Minor allergen Alt a	0.952296	7.45036e-05
StLNC0898	PGSC0003DMG400025186	PGSC0003DMT400064863	271	Minor allergen Alt a	0.973765	9.38575e-06
StLNC1975	PGSC0003DMG400008888	PGSC0003DMT400022940	270	Uracil phosphoribosyltransferase	0.96949	1.58528e-05
StLNC0405	PGSC0003DMG400001514	PGSC0003DMT400003820	270	Srpk	0.951887	7.67315e-05
StLNC1138	PGSC0003DMG400040698	PGSC0003DMT400091127	254	Gene of unknown function	0.951841	7.69825e-05
StLNC2149	PGSC0003DMG400046223	PGSC0003DMT400096652	253	Pentatricopeptide repeat-containing protein	0.978432	4.75052e-06
StLNC1547	PGSC0003DMG400028054	PGSC0003DMT400072105	249	Cytochrome P450	0.957957	4.81494e-05
StLNC1329	PGSC0003DMG400033146	PGSC0003DMT400083260	248	Gene of unknown function	0.960641	3.83216e-05
StLNC2512	PGSC0003DMG400014696	PGSC0003DMT400038111	246	Pentatricopeptide repeat-containing protein	0.958029	4.78648e-05
StLNC1057	PGSC0003DMG400025172	PGSC0003DMT400064813	237	Conserved gene of unknown function	0.955051	6.06632e-05
StLNC1293	PGSC0003DMG400008393	PGSC0003DMT400021631	233	Cc-nbs-lrr resistance protein	0.95475	6.20768e-05
StLNC2176	PGSC0003DMG401026992	PGSC0003DMT400069427	232	Integrator complex subunit	0.954639	6.26062e-05
StLNC1017	PGSC0003DMG400001514	PGSC0003DMT400003820	232	Srpk	0.978982	4.34228e-06
StLNC0559	PGSC0003DMG400001514	PGSC0003DMT400003820	232	Srpk	0.976358	6.53777e-06
StLNC0840	PGSC0003DMG400012544	PGSC0003DMT400032656	226	Gene of unknown function	0.975897	6.99106e-06
StLNC2565	PGSC0003DMG400004333	PGSC0003DMT400011070	223	Conserved gene of unknown function	0.975557	7.34e-06
StLNC1110	PGSC0003DMG400025169	PGSC0003DMT400064797	221	Gene of unknown function	0.974414	8.6033e-06
StLNC2655	PGSC0003DMG400010936	PGSC0003DMT400028377	220	Gene of unknown function	0.969498	1.58385e-05
StLNC2482	PGSC0003DMG400023096	PGSC0003DMT400059443	217	70 kDa subunit of replication protein A	0.969192	1.63968e-05
StLNC1545	PGSC0003DMG400026163	PGSC0003DMT400067285	205	SET domain-containing protein	0.968636	1.74479e-05
StLNC0495	PGSC0003DMG400040086	PGSC0003DMT400090515	205	Regulator of ribonuclease activity A	0.968434	1.78408e-05
StLNC0424	PGSC0003DMG400040086	PGSC0003DMT400090515	205	Regulator of ribonuclease activity A	0.967763	1.91908e-05
StLNC1982	PGSC0003DMG400023925	PGSC0003DMT400061484	190	Ribosomal protein L25	0.966742	2.13819e-05
StLNC2049	PGSC0003DMG400034566	PGSC0003DMT400084995	188	Gene of unknown function	0.965011	2.54941e-05
StLNC2425	PGSC0003DMG400045250	PGSC0003DMT400095679	175	Gene of unknown function	0.955679	5.77853e-05
StLNC0723	PGSC0003DMG400006128	PGSC0003DMT400015684	169	Fertility restorer	0.977896	5.17363e-06
StLNC1091	PGSC0003DMG400006128	PGSC0003DMT400015684	169	Fertility restorer	0.977823	5.23343e-06
StLNC1267	PGSC0003DMG400012121	PGSC0003DMT400031593	165	Serine/threonine protein kinase	0.977797	5.25465e-06
StLNC0235	PGSC0003DMG402009997	PGSC0003DMT400025891	162	Conserved gene of unknown function	0.976848	6.07811e-06
StLNC0465	PGSC0003DMG400012575	PGSC0003DMT400032753	160	ABC4 (ABERRANT CHLOROPLAST DEVELOPMENT 4)	0.973099	1.02403e-05
StLNC0449	PGSC0003DMG402029995	PGSC0003DMT400077130	158	TMV resistance protein N	0.970475	1.41468e-05
StLNC2719	PGSC0003DMG402009997	PGSC0003DMT400025891	154	Conserved gene of unknown function	0.970139	1.47133e-05
StLNC0714	PGSC0003DMG402009997	PGSC0003DMT400025891	153	Conserved gene of unknown function	0.967185	2.04109e-05
StLNC0703	PGSC0003DMG400023097	PGSC0003DMT400059447	153	Gene of unknown function	0.957919	4.82987e-05
StLNC1165	PGSC0003DMG400005163	PGSC0003DMT400013225	152	Cop9 complex subunit	0.956821	5.27994e-05
StLNC2391	PGSC0003DMG402030517	PGSC0003DMT400078381	149	Pentatricopeptide repeat-containing protein	0.956016	5.62803e-05
StLNC2272	PGSC0003DMG403005999	PGSC0003DMT400015386	148	Conserved gene of unknown function	0.955875	5.69058e-05
StLNC0961	PGSC0003DMG402009997	PGSC0003DMT400025891	147	Conserved gene of unknown function	0.952871	7.14466e-05
StLNC2288	PGSC0003DMG400010998	PGSC0003DMT400028567	147	Actin depolymerizing factor	0.978694	4.55252e-06
StLNC2843	PGSC0003DMG400017737	PGSC0003DMT400045740	147	UDP-glucosyltransferase	0.971328	1.27785e-05
StLNC2285	PGSC0003DMG400010447	PGSC0003DMT400027085	145	Serine-threonine protein kinase, plant-type	0.969774	1.53471e-05
StLNC2789	PGSC0003DMG400002488	PGSC0003DMT400006368	139	Mitochondrial import inner membrane translocase subunit Tim17 family protein	0.969564	1.57207e-05
StLNC1299	PGSC0003DMG400005303	PGSC0003DMT400013577	138	Gene of unknown function	0.964323	2.72736e-05
StLNC1346	PGSC0003DMG402009997	PGSC0003DMT400025891	138	Conserved gene of unknown function	0.959093	4.37948e-05
StLNC0006	PGSC0003DMG402009997	PGSC0003DMT400025891	138	Conserved gene of unknown function	0.955705	5.76649e-05
StLNC1728	PGSC0003DMG400008596	PGSC0003DMT400022156	138	Cc-nbs-lrr resistance protein	0.953839	6.65058e-05
StLNC2394	PGSC0003DMG400009787	PGSC0003DMT400025349	137	Leucine-rich repeat resistance protein	0.951887	7.67325e-05
StLNC2221	PGSC0003DMG400021397	PGSC0003DMT400055136	136	Gene of unknown function	0.950261	8.60548e-05
StLNC2316	PGSC0003DMG403005999	PGSC0003DMT400015386	133	Conserved gene of unknown function	0.978806	4.47012e-06
StLNC0528	PGSC0003DMG403005999	PGSC0003DMT400015386	130	Conserved gene of unknown function	0.978368	4.79975e-06
StLNC0989	PGSC0003DMG400038520	PGSC0003DMT400088949	129	Gene of unknown function	0.969093	1.65815e-05
StLNC0336	PGSC0003DMG400023427	PGSC0003DMT400060223	128	Zinc finger protein	0.965952	2.3196e-05
StLNC0801	PGSC0003DMG400003739	PGSC0003DMT400009587	123	Conserved gene of unknown function	0.962074	3.37044e-05
StLNC1796	PGSC0003DMG400035925	PGSC0003DMT400086354	123	Las1-like family protein	0.961058	3.69365e-05
StLNC2839	PGSC0003DMG400028255	PGSC0003DMT400072619	117	Soul heme-binding family protein	0.956119	5.5824e-05
StLNC1966	PGSC0003DMG402030517	PGSC0003DMT400078381	116	Pentatricopeptide repeat-containing protein	0.951997	7.61278e-05
StLNC0546	PGSC0003DMG402009997	PGSC0003DMT400025891	115	Conserved gene of unknown function	0.967601	1.95278e-05
StLNC2744	PGSC0003DMG400028004	PGSC0003DMT400071979	113	Isoform 2 of Probable plastid-lipid-associated protein 13, chloroplastic	0.95624	5.5296e-05
StLNC1135	PGSC0003DMG400029822	PGSC0003DMT400076678	111	Replication factor A	0.954916	6.1296e-05
StLNC0843	PGSC0003DMG400027922	PGSC0003DMT400071781	110	Conserved gene of unknown function	0.978336	4.82401e-06
StLNC0539	PGSC0003DMG400029822	PGSC0003DMT400076678	110	Replication factor A	0.97697	5.96797e-06
StLNC1124	PGSC0003DMG400003992	PGSC0003DMT400010194	110	Conserved gene of unknown function	0.973278	1.00056e-05
StLNC1129	PGSC0003DMG400041203	PGSC0003DMT400091632	106	UDP-glucose:sesaminol 2'-O-glucoside-O-glucosyltransferase	0.972363	1.12471e-05
StLNC2663	PGSC0003DMG400000794	PGSC0003DMT400002085	103	Extensin (ext)	0.968906	1.69309e-05
StLNC0947	PGSC0003DMG400011476	PGSC0003DMT400029859	103	Thioredoxin 1	0.964222	2.75421e-05
StLNC0481	PGSC0003DMG400008578	PGSC0003DMT400022115	101	Conserved gene of unknown function	0.956652	5.35154e-05
StLNC0206	PGSC0003DMG400000246	PGSC0003DMT400000688	99	Trehalose-6-phosphate synthase	0.955545	5.83894e-05
StLNC1632	PGSC0003DMG400016431	PGSC0003DMT400042364	99	Reverse transcriptase	0.953011	7.07172e-05
StLNC1470	PGSC0003DMG401007845	PGSC0003DMT400020288	99	ATP binding protein	0.951905	7.66318e-05
StLNC0903	PGSC0003DMG403005640	PGSC0003DMT400014381	99	HUELLENLOS	0.962387	3.27505e-05
StLNC2404	PGSC0003DMG404005966	PGSC0003DMT400015295	99	TRANSPARENT TESTA 12 protein	0.97545	7.45208e-06
StLNC1184	PGSC0003DMG400014104	PGSC0003DMT400036586	98	Patatin-2-Kuras 4	0.950356	8.54881e-05
StLNC1180	PGSC0003DMG400000834	PGSC0003DMT400002180	91	Gene of unknown function	0.961703	3.48594e-05
StLNC2353	PGSC0003DMG400023112	PGSC0003DMT400059487	86	Kinesin	0.959845	4.10714e-05
StLNC0581	PGSC0003DMG400004289	PGSC0003DMT400010951	86	SET domain protein	0.951647	7.80564e-05
StLNC1142	PGSC0003DMG400008846	PGSC0003DMT400022802	84	P-type trefoil	0.950866	8.2499e-05
StLNC0387	PGSC0003DMG400025994	PGSC0003DMT400066867	83	BZIP domain class transcription factor	0.976574	6.33182e-06
StLNC2738	PGSC0003DMG400026612	PGSC0003DMT400068436	81	Conserved gene of unknown function	0.972838	1.05893e-05
StLNC1987	PGSC0003DMG401024077	PGSC0003DMT400061878	81	ATP binding protein	0.970021	1.49174e-05
StLNC0439	PGSC0003DMG400029822	PGSC0003DMT400076678	77	Replication factor A	0.968971	1.68084e-05
StLNC1543	PGSC0003DMG400029822	PGSC0003DMT400076678	77	Replication factor A	0.967866	1.89782e-05
StLNC0638	PGSC0003DMG400005660	PGSC0003DMT400014425	73	Eukaryotic peptide chain release factor GTP-binding subunit	0.966414	2.21215e-05
StLNC1106	PGSC0003DMG400022867	PGSC0003DMT400058860	67	MADS box protein	0.964946	2.5657e-05
StLNC1954	PGSC0003DMG400018012	PGSC0003DMT400046413	65	Conserved gene of unknown function	0.962464	3.25185e-05
StLNC2392	PGSC0003DMG403005640	PGSC0003DMT400014381	64	HUELLENLOS	0.957241	5.1043e-05
[truncated: 858 more rows]
