# Supplementary material for: Genome-Wide Identification and Characterization of Potato Long Non-coding RNAs Associated With Phytophthora infestans Resistance
Source: Front Plant Sci. 2021 Feb 10;12:619062. doi: 10.3389/fpls.2021.619062 (PMC7902931; doi:10.3389/fpls.2021.619062)
Supplement: Supplementary Table 9 — KEGG and GO enrichment analysis of specific lncRNAs from P. infestans-infected samples. [file Table_9.XLSX]

## Sheet: KEGG
#PathwayID	PathwayName	GenesName	Gene Number	All Genes	Pvalue	Qvalue	PathwayLink
ko00909	Sesquiterpenoid and triterpenoid biosynthesis	PGSC0003DMT400048787	1	20	0.00447292	0.253439	http://www.genome.jp/kegg-bin/show_pathway?ko00909/K15813%09red
ko04130	SNARE interactions in vesicular transport	PGSC0003DMT400055372	1	44	0.00934723	0.253439	http://www.genome.jp/kegg-bin/show_pathway?ko04130/K08486%09red
ko03020	RNA polymerase	PGSC0003DMT400065237	1	46	0.00974234	0.253439	http://www.genome.jp/kegg-bin/show_pathway?ko03020/K03018%09red
ko00310	Lysine degradation	PGSC0003DMT400071652	1	49	0.0103319	0.253439	http://www.genome.jp/kegg-bin/show_pathway?ko00310/K00658%09red
ko00020	Citrate cycle (TCA cycle)	PGSC0003DMT400071652	1	59	0.0122701	0.253439	http://www.genome.jp/kegg-bin/show_pathway?ko00020/K00658%09red
ko00195	Photosynthesis	PGSC0003DMT400010484	1	65	0.0134135	0.253439	http://www.genome.jp/kegg-bin/show_pathway?ko00195/K02641%09red
ko03430	Mismatch repair	PGSC0003DMT400062254	1	69	0.0141677	0.253439	http://www.genome.jp/kegg-bin/show_pathway?ko03430/K07466%09red
ko03030	DNA replication	PGSC0003DMT400062254	1	72	0.0147292	0.253439	http://www.genome.jp/kegg-bin/show_pathway?ko03030/K07466%09red
ko03420	Nucleotide excision repair	PGSC0003DMT400062254	1	83	0.0167575	0.253439	http://www.genome.jp/kegg-bin/show_pathway?ko03420/K07466%09red
ko03440	Homologous recombination	PGSC0003DMT400062254	1	88	0.017664	0.253439	http://www.genome.jp/kegg-bin/show_pathway?ko03440/K07466%09red
ko00480	Glutathione metabolism	PGSC0003DMT400005546	1	107	0.0210218	0.277488	http://www.genome.jp/kegg-bin/show_pathway?ko00480/K00799%09red
ko00240	Pyrimidine metabolism	PGSC0003DMT400065237	1	124	0.0239132	0.285763	http://www.genome.jp/kegg-bin/show_pathway?ko00240/K03018%09red
ko00230	Purine metabolism	PGSC0003DMT400065237	1	151	0.0282956	0.311251	http://www.genome.jp/kegg-bin/show_pathway?ko00230/K03018%09red
ko00940	Phenylpropanoid biosynthesis	PGSC0003DMT400065518	1	229	0.0396238	0.421801	http://www.genome.jp/kegg-bin/show_pathway?ko00940/K00430%09red
ko01200	Carbon metabolism	PGSC0003DMT400071652	1	277	0.0457099	0.471383	http://www.genome.jp/kegg-bin/show_pathway?ko01200/K00658%09red
ko04075	Plant hormone signal transduction	PGSC0003DMT400067782	1	322	0.0508721	0.508721	http://www.genome.jp/kegg-bin/show_pathway?ko04075/K14431%09red

## Sheet: GO
GO_accession	Description	GeneNames	Ontology	pValue	qValue	Gene Number	All Genes
GO:0007275	multicellular organism development	PGSC0003DMT400003980,PGSC0003DMT400011693,PGSC0003DMT400067782,PGSC0003DMT400072893,PGSC0003DMT400084490	BP	0.0183	0.06039	5	826
GO:0048856	anatomical structure development	PGSC0003DMT400003980,PGSC0003DMT400011693,PGSC0003DMT400067782,PGSC0003DMT400072893,PGSC0003DMT400084490	BP	0.0222	0.0407	5	867
GO:0032502	developmental process	PGSC0003DMT400003980,PGSC0003DMT400011693,PGSC0003DMT400067782,PGSC0003DMT400072893,PGSC0003DMT400084490	BP	0.0245	0.0425526	5	889
GO:0009908	flower development	PGSC0003DMT400067782,PGSC0003DMT400072893,PGSC0003DMT400084490	BP	0.0031	0.1023	3	154
GO:0090567	reproductive shoot system development	PGSC0003DMT400067782,PGSC0003DMT400072893,PGSC0003DMT400084490	BP	0.0034	0.0561	3	159
GO:0048367	shoot system development	PGSC0003DMT400067782,PGSC0003DMT400072893,PGSC0003DMT400084490	BP	0.0095	0.078375	3	229
GO:0009791	post-embryonic development	PGSC0003DMT400067782,PGSC0003DMT400072893,PGSC0003DMT400084490	BP	0.0197	0.054175	3	301
GO:0048608	reproductive structure development	PGSC0003DMT400067782,PGSC0003DMT400072893,PGSC0003DMT400084490	BP	0.0211	0.0480207	3	309
GO:0061458	reproductive system development	PGSC0003DMT400067782,PGSC0003DMT400072893,PGSC0003DMT400084490	BP	0.0211	0.0480207	3	309
GO:0003006	developmental process involved in reproduction	PGSC0003DMT400067782,PGSC0003DMT400072893,PGSC0003DMT400084490	BP	0.0247	0.040755	3	328
GO:0000003	reproduction	PGSC0003DMT400067782,PGSC0003DMT400072893,PGSC0003DMT400084490	BP	0.0349	0.0434604	3	375
GO:0022414	reproductive process	PGSC0003DMT400067782,PGSC0003DMT400072893,PGSC0003DMT400084490	BP	0.0349	0.0434604	3	375
GO:0048731	system development	PGSC0003DMT400067782,PGSC0003DMT400072893,PGSC0003DMT400084490	BP	0.0462	0.0491806	3	419
GO:0005576	extracellular region	PGSC0003DMT400011693,PGSC0003DMT400034092,PGSC0003DMT400065518	CC	0.16	0.16	3	798
GO:0008757	S-adenosylmethionine-dependent methyltransferase activity	PGSC0003DMT400011103,PGSC0003DMT400084490	MF	0.0088	0.0322667	2	70
GO:0030154	cell differentiation	PGSC0003DMT400072893,PGSC0003DMT400084490	BP	0.0342	0.047025	2	150
GO:0016999	antibiotic metabolic process	PGSC0003DMT400065518,PGSC0003DMT400071652	BP	0.0385	0.045375	2	160
GO:0009873	ethylene-activated signaling pathway	PGSC0003DMT400006170,PGSC0003DMT400011693	BP	0.0496	0.05115	2	184
GO:0004324	ferredoxin-NADP+ reductase activity	PGSC0003DMT400010484	MF	0.0061	0.0671	1	3
GO:0071588	hydrogen peroxide mediated signaling pathway	PGSC0003DMT400067782	BP	0.0078	0.0858	1	4
GO:0016731	oxidoreductase activity, acting on iron-sulfur proteins as donors, NAD or NADP as acceptor	PGSC0003DMT400010484	MF	0.0081	0.04455	1	4
GO:0008728	GTP diphosphokinase activity	PGSC0003DMT400001460	MF	0.0102	0.02805	1	5
GO:0006554	lysine catabolic process	PGSC0003DMT400071652	BP	0.0117	0.0551571	1	6
GO:0019474	L-lysine catabolic process to acetyl-CoA	PGSC0003DMT400071652	BP	0.0117	0.0551571	1	6
GO:0019477	L-lysine catabolic process	PGSC0003DMT400071652	BP	0.0117	0.0551571	1	6
GO:0033512	L-lysine catabolic process to acetyl-CoA via saccharopine	PGSC0003DMT400071652	BP	0.0117	0.0551571	1	6
GO:0046440	L-lysine metabolic process	PGSC0003DMT400071652	BP	0.0117	0.0551571	1	6
GO:0016730	oxidoreductase activity, acting on iron-sulfur proteins as donors	PGSC0003DMT400010484	MF	0.0142	0.03124	1	7
GO:0009068	aspartate family amino acid catabolic process	PGSC0003DMT400071652	BP	0.0195	0.0585	1	10
GO:0006084	acetyl-CoA metabolic process	PGSC0003DMT400071652	BP	0.0214	0.0428	1	11
GO:0048653	anther development	PGSC0003DMT400067782	BP	0.0214	0.0428	1	11
GO:0048443	stamen development	PGSC0003DMT400067782	BP	0.0253	0.0388326	1	13
GO:0048466	androecium development	PGSC0003DMT400067782	BP	0.0253	0.0388326	1	13
GO:0016778	diphosphotransferase activity	PGSC0003DMT400001460	MF	0.0262	0.0480333	1	13
GO:0006553	lysine metabolic process	PGSC0003DMT400071652	BP	0.0272	0.0390261	1	14
GO:0004568	chitinase activity	PGSC0003DMT400011693	MF	0.0322	0.0506	1	16
GO:0048438	floral whorl development	PGSC0003DMT400067782	BP	0.0348	0.045936	1	18
GO:0006637	acyl-CoA metabolic process	PGSC0003DMT400071652	BP	0.0405	0.0453051	1	21
GO:0035383	thioester metabolic process	PGSC0003DMT400071652	BP	0.0405	0.0453051	1	21
GO:0018024	histone-lysine N-methyltransferase activity	PGSC0003DMT400084490	MF	0.044	0.0605	1	22
GO:0016278	lysine N-methyltransferase activity	PGSC0003DMT400084490	MF	0.0459	0.05049	1	23
GO:0016279	protein-lysine N-methyltransferase activity	PGSC0003DMT400084490	MF	0.0459	0.05049	1	23
GO:0042054	histone methyltransferase activity	PGSC0003DMT400084490	MF	0.0459	0.05049	1	23
GO:0002237	response to molecule of bacterial origin	PGSC0003DMT400067782	BP	0.0499	0.0499	1	26
