# Supplementary material for: Genome-Wide Identification and Characterization of Potato Long Non-coding RNAs Associated With Phytophthora infestans Resistance
Source: Front Plant Sci. 2021 Feb 10;12:619062. doi: 10.3389/fpls.2021.619062 (PMC7902931; doi:10.3389/fpls.2021.619062)
Supplement: Supplementary Table 10 — Identification of DELs at 24 and 48 h compared with 0 h under the same treatment in WT or RB tissue. [file Table_10.XLSX]

## Sheet: ht3_vs_ht0
LncRNA	log2FC	pvalue	regulations	ht3_1	ht3_2	ht3_3	ht0_1	ht0_2	ht0_3
StLNC1624	-9.23639	1.01e-05	down	0	0	0	76	341	7
StLNC1078	-8.14376	2.43e-07	down	1	1	1	341	683	8
StLNC0257	-8.14043	0.00880695	down	0	0	0	0	65	78
StLNC2293	-7.98298	0.00938311	down	0	0	0	0	93	52
StLNC1775	-7.57963	0.0116898	down	0	0	0	45	83	0
StLNC1794	-7.53518	0.000798035	down	0	0	0	61	2	28
StLNC0845	-7.48073	0.0134413	down	0	0	0	31	93	0
StLNC0230	-7.13986	0.000149203	down	0	0	0	39	45	4
StLNC0456	-7.07286	0.00187878	down	0	2	1	57	431	0
StLNC0069	-7.066	0.070775	no change	0	0	0	0	0	53
StLNC0152	-6.87949	0.0785787	no change	0	0	0	64	0	0
StLNC0839	-6.80128	0.00123998	down	0	0	0	2	40	22
StLNC0900	-6.70318	0.00114049	down	0	0	1	32	108	1
StLNC1965	-6.57998	0.0925711	no change	0	0	0	52	0	0
StLNC0903	-6.53514	0.000327742	down	0	0	0	27	8	13
StLNC0303	-6.52797	0.000283709	down	0	0	1	74	14	10
StLNC2321	-6.52544	0.0300539	down	0	0	0	28	31	0
StLNC2341	-6.48749	0.0130826	down	1	0	0	25	0	51
StLNC1442	-6.25609	0.0454482	down	0	0	0	0	16	22
StLNC0616	-6.20155	0.113054	no change	0	0	0	40	0	0
StLNC0876	-6.20003	0.00243874	down	0	0	2	84	79	1
StLNC0818	-6.1805	2.82e-05	down	0	0	6	141	238	78
StLNC2679	-6.16503	0.115208	no change	0	0	0	39	0	0
StLNC1033	-6.15639	0.000233783	down	0	0	0	16	11	11
StLNC2448	-6.12756	0.11745	no change	0	0	0	38	0	0
StLNC0514	-6.04958	0.122229	no change	0	0	0	36	0	0
StLNC2838	-5.969	0.0747411	no change	0	0	0	2	45	0
StLNC2730	-5.96714	0.127447	no change	0	0	0	34	0	0
StLNC1589	-5.96714	0.127447	no change	0	0	0	34	0	0
StLNC2521	-5.93267	0.00614612	down	0	0	0	2	34	5
StLNC1160	-5.89149	0.0534737	no change	0	0	0	18	20	0
StLNC1159	-5.8802	0.133136	no change	0	0	0	0	45	0
StLNC2299	-5.8797	0.133169	no change	0	0	0	32	0	0
StLNC0204	-5.8797	0.133169	no change	0	0	0	32	0	0
StLNC0239	-5.8646	0.0250316	down	0	0	0	1	41	1
StLNC0233	-5.80827	0.016518	down	0	0	0	1	5	19
StLNC0927	-5.77937	0.0247883	down	0	0	2	20	120	0
StLNC1332	-5.75651	0.003619	down	0	0	0	19	5	5
StLNC2625	-5.74631	0.142283	no change	0	0	0	0	41	0
StLNC1642	-5.74273	0.087154	no change	0	0	0	0	37	2
StLNC0439	-5.71412	0.0731993	no change	0	0	0	5	33	0
StLNC2401	-5.68795	0.00122989	down	0	0	0	11	16	4
StLNC1885	-5.65666	0.148674	no change	0	0	0	0	0	20
StLNC0599	-5.65179	0.000705022	down	0	0	8	163	228	43
StLNC0206	-5.63705	0.150102	no change	0	0	0	0	38	0
StLNC0302	-5.63466	0.150277	no change	0	0	0	27	0	0
StLNC1987	-5.63395	0.067443	no change	0	0	0	12	21	0
StLNC2488	-5.6105	0.0722282	no change	0	0	0	8	26	0
StLNC2746	-5.59871	0.152923	no change	0	0	0	0	37	0
StLNC2805	-5.58238	0.154136	no change	0	0	0	0	0	19
StLNC1528	-5.55933	0.155862	no change	0	0	0	0	36	0
StLNC2311	-5.52366	0.158561	no change	0	0	0	25	0	0
StLNC0698	-5.50406	0.16006	no change	0	0	0	0	0	18
StLNC0715	-5.48302	0.0901552	no change	0	0	0	12	0	9
StLNC0174	-5.43792	0.0891514	no change	0	0	0	5	26	0
StLNC2403	-5.42122	0.0820373	no change	0	0	0	14	13	0
StLNC0409	-5.40344	0.0827751	no change	0	0	0	13	14	0
StLNC2464	-5.36607	0.0926842	no change	0	0	0	0	18	7
StLNC2081	-5.35242	0.101985	no change	0	0	0	14	0	6
StLNC1972	-5.34817	0.0951085	no change	0	0	0	5	24	0
StLNC2367	-5.3334	0.173568	no change	0	0	0	0	0	16
StLNC0981	-5.3205	0.135454	no change	0	0	0	21	1	0
StLNC0356	-5.3182	0.130135	no change	0	0	0	1	29	0
StLNC2542	-5.29734	0.176529	no change	0	0	0	0	30	0
StLNC0441	-5.292	0.0912168	no change	0	0	0	12	13	0
StLNC0291	-5.29007	0.00376112	down	0	2	0	28	56	2
StLNC2716	-5.22568	0.104687	no change	0	0	0	0	17	6
StLNC2840	-5.21254	0.0994606	no change	0	0	0	13	10	0
StLNC0147	-5.20185	0.184554	no change	0	0	0	20	0	0
StLNC1753	-5.19825	0.184863	no change	0	0	0	0	28	0
StLNC0856	-5.19202	0.100133	no change	0	0	0	12	11	0
StLNC1239	-5.19143	0.151819	no change	0	0	0	0	1	14
StLNC2354	-5.16271	0.122178	no change	0	0	0	14	0	4
StLNC0590	-5.14603	0.189371	no change	0	0	0	0	27	0
StLNC2846	-5.14603	0.189371	no change	0	0	0	0	27	0
StLNC1363	-5.1398	0.189914	no change	0	0	0	0	0	14
StLNC1279	-5.12788	0.190956	no change	0	0	0	19	0	0
StLNC0215	-5.12294	0.00836516	down	0	0	0	8	4	6
StLNC0097	-5.11572	0.147601	no change	0	0	0	1	25	0
StLNC2530	-5.09185	0.194134	no change	0	0	0	0	26	0
StLNC0493	-5.07429	0.178893	no change	0	1	0	0	0	26
StLNC1886	-5.04992	0.197882	no change	0	0	0	18	0	0
StLNC0134	-5.04844	0.00903776	down	0	0	0	5	5	7
StLNC1085	-5.0323	0.199472	no change	0	0	0	0	0	13
StLNC0666	-5.00664	0.0303018	down	0	0	0	1	6	9
StLNC0073	-5.0046	0.119232	no change	0	0	0	6	16	0
StLNC2591	-4.99133	0.0527026	no change	0	3	0	0	29	45
StLNC0673	-4.9545	0.0215804	down	0	0	0	6	2	7
StLNC2713	-4.944	0.125081	no change	0	0	0	11	8	0
StLNC0200	-4.9371	0.152415	no change	0	0	0	3	0	10
StLNC2039	-4.89446	0.0225969	down	0	0	0	8	2	5
StLNC1242	-4.88007	0.213609	no change	0	0	0	16	0	0
StLNC2302	-4.88007	0.213609	no change	0	0	0	16	0	0
StLNC0581	-4.88007	0.213609	no change	0	0	0	16	0	0
StLNC0841	-4.87348	0.0869907	no change	0	2	0	2	0	36
StLNC1922	-4.85214	0.216279	no change	0	0	0	0	22	0
StLNC1508	-4.8344	0.0135581	down	0	0	0	3	8	5
StLNC0819	-4.79473	0.0198628	down	0	1	1	20	44	0
StLNC2303	-4.7898	0.22233	no change	0	0	0	0	0	11
StLNC2779	-4.7898	0.22233	no change	0	0	0	0	0	11
StLNC1940	-4.78543	0.222758	no change	0	0	0	0	21	0
StLNC0024	-4.75	0.0296603	down	0	0	0	6	10	1
StLNC1898	-4.73327	0.164639	no change	0	0	0	9	0	4
StLNC1564	-4.71548	0.229701	no change	0	0	0	0	20	0
StLNC0712	-4.70427	0.148821	no change	0	0	0	7	10	0
StLNC2080	-4.68752	0.232519	no change	0	0	0	14	0	0
StLNC2141	-4.68752	0.232519	no change	0	0	0	14	0	0
StLNC0662	-4.68752	0.232519	no change	0	0	0	14	0	0
StLNC0016	-4.6766	0.161492	no change	0	0	0	0	8	6
StLNC1227	-4.65134	0.236204	no change	0	0	0	0	0	10
StLNC2425	-4.65134	0.236204	no change	0	0	0	0	0	10
StLNC2539	-4.65134	0.236204	no change	0	0	0	0	0	10
StLNC2581	-4.65134	0.236204	no change	0	0	0	0	0	10
StLNC2829	-4.65134	0.236204	no change	0	0	0	0	0	10
StLNC1025	-4.6491	0.0944354	no change	0	1	0	2	0	18
StLNC1795	-4.64196	0.237165	no change	0	0	0	0	19	0
StLNC2199	-4.64196	0.237165	no change	0	0	0	0	19	0
StLNC0126	-4.60627	0.0674385	no change	1	0	0	5	29	0
StLNC1769	-4.50653	0.0629819	no change	0	0	1	14	14	0
StLNC1692	-4.47614	0.0356533	down	0	0	1	2	28	1
StLNC0552	-4.33731	0.152193	no change	10	0	0	230	18	0
StLNC0785	-4.18364	0.00228321	down	0	4	0	18	30	19
StLNC0549	-4.1051	0.13944	no change	0	0	1	1	24	0
StLNC2103	-4.07297	0.0958719	no change	0	1	0	7	15	0
StLNC2329	-3.99502	0.126187	no change	3	0	0	0	42	19
StLNC0058	-3.98242	0.0295532	down	0	0	12	99	49	34
StLNC0403	-3.79002	0.0721433	no change	0	3	1	42	10	0
StLNC1070	-3.74577	0.093319	no change	0	14	12	83	320	0
StLNC1028	-3.68086	0.33397	no change	0	0	1	0	19	0
StLNC0710	-3.67283	0.000588086	down	4	9	5	113	133	8
StLNC0546	-3.58551	0.219917	no change	7	0	0	6	133	0
StLNC0037	-3.52931	0.277148	no change	0	0	49	0	676	41
StLNC0424	-3.46888	0.21532	no change	5	0	0	0	79	7
StLNC0141	-3.44318	0.200023	no change	2	0	0	6	0	14
StLNC1847	-3.40967	0.129323	no change	18	0	0	144	111	5
StLNC1999	-3.40342	0.0974169	no change	1	0	1	1	1	15
StLNC0050	-3.35888	0.0983366	no change	0	0	3	24	2	3
StLNC1697	-3.2551	0.0184121	down	2	40	2	160	242	22
StLNC0559	-3.22163	0.0808378	no change	0	15	0	48	70	15
StLNC2165	-3.21477	0.0342154	down	0	3	0	10	8	7
StLNC0105	-3.20144	0.0554132	no change	5	0	0	18	26	12
StLNC1113	-3.1922	0.0139005	down	10	4	0	44	90	22
StLNC1831	-3.17323	0.00160709	down	2	2	4	30	45	6
StLNC0033	-3.09494	0.0804266	no change	0	0	5	16	29	3
StLNC2190	-3.01824	0.090306	no change	0	0	5	5	13	18
StLNC0817	-2.97874	0.43192	no change	4	0	0	0	53	0
StLNC1942	-2.96852	0.431296	no change	0	0	7	52	0	0
StLNC1156	-2.95637	0.144602	no change	16	0	0	27	63	56
StLNC1788	-2.94962	0.0806425	no change	0	3	0	10	11	2
StLNC0870	-2.94609	0.0017905	down	27	74	70	195	1254	112
StLNC0925	-2.92789	0.296479	no change	0	3	0	1	26	0
StLNC0934	-2.89408	0.0442755	down	16	53	9	10	660	42
StLNC2764	-2.85433	0.000613386	down	3	5	3	39	32	11
StLNC1103	-2.79544	0.119384	no change	0	2	0	2	9	3
StLNC0366	-2.7666	0.153278	no change	0	21	0	35	37	43
StLNC0319	-2.7666	0.102103	no change	0	0	7	17	17	12
StLNC0855	-2.75971	0.474414	no change	2	0	0	16	0	0
StLNC0504	-2.75794	0.230672	no change	0	0	45	217	33	35
StLNC2549	-2.75241	0.0544874	no change	8	10	0	40	100	7
StLNC2417	-2.73613	0.295698	no change	4	0	0	15	23	0
StLNC0104	-2.72752	0.29769	no change	2	0	0	0	8	7
StLNC0214	-2.69438	0.0403243	down	4	1	7	4	78	14
StLNC1573	-2.66244	0.318444	no change	0	3	0	2	20	0
StLNC0724	-2.64089	0.0127384	down	0	9	6	33	32	21
StLNC0086	-2.63621	0.311195	no change	0	0	4	0	16	9
StLNC1959	-2.61581	0.0558204	no change	5	9	0	9	33	37
StLNC1006	-2.60773	0.338082	no change	2	0	0	10	0	3
StLNC1148	-2.60223	0.206751	no change	0	0	2	3	1	6
StLNC0328	-2.59451	0.0816364	no change	5	25	0	95	67	15
StLNC1882	-2.59263	0.00171703	down	22	8	28	83	124	137
StLNC1256	-2.56321	0.505681	no change	0	3	0	0	0	11
StLNC2079	-2.54159	0.0144631	down	4	6	7	51	55	4
StLNC0617	-2.52218	0.396126	no change	18	0	0	28	136	0
StLNC2428	-2.47308	0.327298	no change	0	0	3	8	11	0
StLNC1551	-2.4652	0.162869	no change	0	9	0	10	15	16
StLNC1041	-2.43491	0.369009	no change	0	4	0	2	23	0
StLNC0548	-2.42786	0.125196	no change	0	1	3	2	5	11
StLNC0442	-2.41646	0.220098	no change	4	4	0	19	34	0
StLNC1110	-2.40699	0.101692	no change	15	0	9	15	95	42
StLNC1961	-2.40468	0.113297	no change	25	40	30	448	5	26
StLNC1017	-2.36805	0.201161	no change	0	11	0	20	30	5
StLNC1906	-2.36334	0.0144913	down	3	4	3	20	34	4
StLNC0652	-2.35294	0.0488197	down	4	0	5	22	17	10
StLNC1557	-2.33132	0.168212	no change	0	0	5	6	12	7
StLNC0800	-2.314	0.00413457	down	12	4	13	38	57	51
StLNC0702	-2.31226	0.382284	no change	0	0	5	0	14	10
StLNC2369	-2.31143	0.477695	no change	73	0	0	280	223	0
StLNC0211	-2.30881	0.200796	no change	0	0	7	7	25	6
StLNC1889	-2.26872	0.214902	no change	3	1	3	0	5	23
StLNC0448	-2.26593	0.231178	no change	7	0	0	7	17	15
StLNC0795	-2.24269	0.445486	no change	3	7	0	0	63	0
StLNC2743	-2.23844	0.00774751	down	4	8	6	48	24	12
StLNC2300	-2.19679	0.161704	no change	2	8	3	20	49	0
StLNC0194	-2.18836	0.00882294	down	116	234	234	761	2157	180
StLNC2466	-2.174	0.222532	no change	5	0	0	8	12	7
StLNC1040	-2.16284	0.167921	no change	5	2	3	28	26	0
StLNC1058	-2.15135	0.0733433	no change	2	6	0	13	17	6
StLNC1264	-2.15097	0.0352841	down	8	12	16	43	143	7
StLNC1466	-2.14992	0.161242	no change	11	29	0	107	24	31
StLNC1023	-2.14634	0.450826	no change	0	0	10	0	9	26
StLNC1228	-2.12601	0.458175	no change	13	0	0	22	65	0
StLNC1390	-2.12375	0.20735	no change	0	6	0	8	11	5
StLNC0027	-2.12291	0.0122819	down	47	446	277	765	1422	900
StLNC0764	-2.09803	0.461574	no change	0	3	4	0	38	0
StLNC1004	-2.09695	0.0781079	no change	14	1	3	35	43	15
StLNC0349	-2.09342	0.223591	no change	2	52	0	95	94	25
StLNC2848	-2.08613	0.00623765	down	33	77	57	224	516	59
StLNC0933	-2.07992	0.518162	no change	37	0	0	0	243	12
StLNC0329	-2.07153	0.0180583	down	62	130	195	444	1326	118
StLNC1792	-2.05785	0.415867	no change	0	3	0	5	8	0
StLNC1454	-2.04883	0.376869	no change	0	0	58	34	44	118
StLNC1224	-2.04555	0.194621	no change	0	2	1	1	7	4
StLNC0814	-2.03515	0.0210403	down	7	6	3	16	19	27
StLNC0082	-2.02764	0.383326	no change	17	0	32	0	139	79
StLNC2387	-2.02394	0.117385	no change	0	4	3	5	7	12
StLNC1066	-2.01216	0.402715	no change	17	0	15	15	0	91
StLNC2785	-2.00253	0.134675	no change	0	4	1	4	12	4
StLNC2398	-1.99414	0.00129268	down	11	34	31	63	148	85
StLNC2131	-1.99065	0.153032	no change	0	5	5	11	31	2
StLNC2109	-1.98364	0.603194	no change	0	0	4	0	0	11
StLNC0390	-1.98085	0.603707	no change	0	0	4	15	0	0
StLNC0014	-1.98045	0.0118117	down	10	8	9	39	73	11
StLNC2469	-1.97798	0.0887054	no change	0	8	3	10	23	9
StLNC0488	-1.97136	0.606	no change	3	0	0	14	0	0
StLNC2203	-1.97062	0.24922	no change	2	0	1	1	12	2
StLNC0771	-1.94019	0.00358557	down	11	34	14	62	139	37
StLNC0201	-1.93957	0.303367	no change	4	0	0	10	5	3
StLNC1210	-1.93776	0.321788	no change	4	3	0	17	15	0
StLNC1685	-1.92628	0.0158809	down	17	17	7	29	62	61
StLNC1457	-1.91519	0.0193917	down	17	14	7	25	60	57
StLNC1426	-1.90736	0.3387	no change	2	1	1	0	1	11
StLNC0806	-1.90052	0.000285074	down	14	19	24	89	87	41
StLNC2173	-1.88918	0.362245	no change	8	8	0	19	58	0
StLNC2710	-1.87565	0.133531	no change	0	2	4	5	14	4
StLNC0279	-1.85946	0.263495	no change	0	6	4	1	8	19
StLNC1263	-1.85885	0.0648798	no change	6	4	1	8	23	12
StLNC1029	-1.84823	0.513772	no change	1267	0	0	1660	1859	1848
StLNC1418	-1.84368	0.362787	no change	6	0	0	17	4	4
StLNC1474	-1.83128	0.000107825	down	31	71	37	181	193	111
StLNC2290	-1.82732	0.379027	no change	0	3	4	5	0	13
StLNC1310	-1.81789	0.0914913	no change	2	9	9	14	10	33
StLNC0522	-1.81028	0.00133117	down	9	12	17	37	56	39
StLNC1285	-1.79055	0.176559	no change	0	19	9	16	32	34
StLNC1605	-1.77361	0.388333	no change	0	0	4	7	1	4
StLNC2013	-1.77221	0.267596	no change	0	1	14	13	38	6
StLNC1824	-1.77127	0.317147	no change	22	7	7	113	28	0
StLNC1611	-1.76792	0.00363102	down	26	26	21	105	134	34
StLNC0306	-1.76213	0.378796	no change	0	5	1	12	8	0
StLNC0714	-1.74125	0.080203	no change	5	51	38	125	50	90
StLNC0268	-1.74013	0.00572608	down	25	14	17	73	97	36
StLNC0966	-1.73343	0.0102286	down	5	8	14	31	47	16
StLNC1234	-1.73185	0.205988	no change	2	0	6	11	16	3
StLNC1254	-1.71364	0.390706	no change	3	0	3	0	14	8
StLNC0477	-1.71285	0.0441907	down	29	13	20	106	109	20
StLNC0168	-1.70767	0.0170684	down	20	29	20	100	127	21
StLNC0699	-1.70483	0.0194003	down	44	47	72	271	256	51
StLNC1672	-1.69885	0.0782487	no change	64	8	46	144	195	95
StLNC0094	-1.68441	0.061357	no change	328	503	904	1571	4666	359
StLNC2606	-1.67899	0.0378	down	23	32	59	203	144	35
StLNC1690	-1.65396	0.2877	no change	0	47	10	88	27	34
StLNC1574	-1.64345	0.296383	no change	0	5	1	5	14	1
StLNC1249	-1.64059	0.563067	no change	0	11	0	22	0	5
StLNC2134	-1.6403	0.00997867	down	16	32	11	58	104	32
StLNC0763	-1.63163	0.0856318	no change	5	5	13	18	14	31
StLNC0518	-1.6315	0.104377	no change	4	61	54	160	132	57
StLNC0025	-1.61663	0.405843	no change	0	0	10	5	11	12
StLNC0378	-1.60033	0.3741	no change	0	3	17	2	65	6
StLNC1552	-1.59857	0.46258	no change	0	36	0	60	17	14
StLNC2684	-1.58912	0.242489	no change	3	0	4	3	13	7
StLNC0605	-1.57556	0.28885	no change	2	4	7	19	25	0
StLNC1303	-1.57456	0.163479	no change	1	2	3	3	7	7
StLNC1375	-1.56507	0.00685043	down	20	22	32	88	64	60
StLNC0638	-1.55248	0.594546	no change	9	0	0	0	6	20
StLNC0608	-1.54787	0.300254	no change	2	18	0	27	19	8
StLNC1747	-1.54082	0.408629	no change	192	425	0	216	1576	271
StLNC1198	-1.5383	0.343589	no change	3	3	7	14	0	17
StLNC0162	-1.53802	0.186969	no change	0	4	3	7	7	5
StLNC2291	-1.52234	0.524806	no change	0	80	69	212	236	0
StLNC1774	-1.51674	0.449432	no change	12	4	1	0	4	37
StLNC0959	-1.51365	0.00512862	down	41	40	56	169	187	62
StLNC0062	-1.51095	5.99e-05	down	53	85	99	218	299	162
StLNC1166	-1.50105	0.141733	no change	6	19	4	33	51	5
StLNC2152	-1.49889	0.22465	no change	5	4	0	7	15	6
StLNC2650	-1.48259	0.0219385	down	31	101	50	126	330	82
StLNC0810	-1.48195	0.00927298	down	49	46	60	162	259	61
StLNC2735	-1.4643	0.0262503	down	9	33	32	69	64	56
StLNC2175	-1.45703	0.148208	no change	3	14	6	31	8	16
StLNC0262	-1.45463	0.261651	no change	0	6	5	16	10	3
StLNC1026	-1.45351	0.70244	no change	0	0	5	13	0	0
StLNC1555	-1.44244	0.601892	no change	8	0	0	16	14	0
StLNC1255	-1.44201	0.38605	no change	21	6	6	37	85	0
StLNC0464	-1.44002	0.288584	no change	0	27	30	47	73	29
StLNC0693	-1.43713	0.616917	no change	0	27	0	32	41	0
StLNC1768	-1.42618	0.619983	no change	0	0	22	34	31	0
StLNC2038	-1.42244	0.364399	no change	10	0	35	59	20	35
StLNC0165	-1.42165	0.134633	no change	292	341	410	611	2719	151
StLNC0245	-1.41477	0.0778461	no change	10	5	5	23	18	14
StLNC1079	-1.4028	0.0351523	down	4	10	13	21	30	19
StLNC2784	-1.40083	0.036398	down	33	35	29	137	101	33
StLNC1325	-1.3974	0.371845	no change	0	111	58	145	121	115
StLNC0012	-1.38956	0.0227873	down	12	18	17	35	81	19
StLNC2245	-1.38829	0.0242961	down	17	12	16	51	54	21
StLNC0344	-1.38375	0.161547	no change	14	2	13	34	39	13
StLNC1184	-1.38137	0.310767	no change	41	30	354	699	454	34
StLNC1623	-1.38045	0.63333	no change	0	0	10	0	4	16
StLNC0713	-1.37389	0.495267	no change	6	0	7	15	29	0
StLNC1629	-1.37148	0.644116	no change	15	0	0	33	0	10
StLNC1258	-1.36007	0.01534	down	7	12	13	28	34	20
StLNC1644	-1.35921	0.52961	no change	28	0	0	23	41	25
StLNC2022	-1.35442	0.0875735	no change	19	17	14	40	25	52
StLNC2221	-1.35404	0.407877	no change	75	65	0	192	162	46
StLNC1197	-1.34904	0.723735	no change	0	5	0	0	15	0
StLNC1038	-1.34277	0.00168436	down	683	1048	967	1728	4234	1383
StLNC1328	-1.3316	0.0334707	down	6	10	11	27	24	16
StLNC0793	-1.3313	0.536661	no change	11	4	0	33	12	0
StLNC2198	-1.32749	0.726136	no change	5	0	0	0	0	11
StLNC0091	-1.32289	0.0426479	down	12	23	9	46	49	18
StLNC2842	-1.32252	0.311149	no change	0	19	21	26	36	28
StLNC2334	-1.32049	0.661354	no change	20	0	0	41	0	14
StLNC1596	-1.3157	0.349309	no change	4	29	7	72	3	11
StLNC0258	-1.31494	0.397102	no change	29	0	48	41	81	74
StLNC0185	-1.31181	0.0996219	no change	11	14	9	12	35	34
StLNC1056	-1.29661	0.000180411	down	316	491	406	849	1661	626
StLNC1488	-1.29317	0.0672889	no change	8	32	10	41	48	28
StLNC0619	-1.29316	0.235538	no change	21	2	36	55	71	32
StLNC2680	-1.29264	0.201984	no change	3	2	6	4	13	10
StLNC2170	-1.29086	0.561968	no change	0	52	0	14	45	44
StLNC0914	-1.28918	0.733295	no change	0	8	0	0	0	12
StLNC0084	-1.28706	0.341231	no change	4	130	9	38	155	109
StLNC0663	-1.28081	0.650874	no change	0	0	6	3	0	8
StLNC1369	-1.27115	0.0410713	down	6	12	8	20	33	12
StLNC0337	-1.26712	0.301683	no change	0	14	9	14	19	16
StLNC2555	-1.26353	0.00254486	down	55	90	98	211	288	107
StLNC2528	-1.25876	0.364866	no change	1	5	1	3	15	1
StLNC2015	-1.25331	0.27778	no change	2	3	2	3	4	8
StLNC1355	-1.24475	0.20818	no change	2	4	3	4	15	4
StLNC1731	-1.23216	0.409294	no change	4	25	0	13	21	24
StLNC2494	-1.22965	0.540262	no change	0	7	3	0	8	11
StLNC1190	-1.22531	0.186043	no change	4	4	12	17	30	5
StLNC0330	-1.21558	0.225505	no change	2	2	3	6	8	3
StLNC1911	-1.21483	0.000422319	down	1225	1258	1386	3274	3798	2146
StLNC2482	-1.21381	0.343085	no change	0	3	3	5	7	2
StLNC0609	-1.19805	0.282997	no change	5	2	12	17	31	3
StLNC2708	-1.198	0.506931	no change	0	48	39	47	5	92
StLNC2451	-1.19269	0.0913901	no change	14	14	8	21	29	30
StLNC0326	-1.18826	0.0732676	no change	18	20	24	61	78	16
StLNC1111	-1.18546	0.28617	no change	15	2	4	23	26	8
StLNC0207	-1.18264	0.15812	no change	28	22	65	34	157	82
StLNC1712	-1.1788	0.0468429	down	24	41	38	116	74	41
StLNC2562	-1.17788	0.0601126	no change	34	26	45	116	92	41
StLNC1433	-1.17739	0.143468	no change	4	12	6	22	23	6
StLNC0212	-1.17437	0.156041	no change	39	48	15	34	108	86
StLNC1424	-1.16663	0.687218	no change	5	2	0	0	24	0
StLNC0811	-1.16659	0.392084	no change	45	7	3	18	134	20
StLNC0109	-1.16613	0.671285	no change	0	6	0	6	0	4
StLNC0769	-1.16168	0.263059	no change	3	1	5	6	12	4
StLNC1220	-1.16081	0.432011	no change	3	0	13	19	8	8
StLNC2306	-1.16021	0.685413	no change	0	5	5	20	0	0
StLNC0090	-1.1602	0.570476	no change	9	0	0	6	6	10
StLNC2261	-1.15665	0.588844	no change	0	6	3	15	0	2
StLNC1057	-1.15455	0.0770433	no change	27	27	11	52	58	38
StLNC0224	-1.1496	0.680739	no change	0	2	3	0	14	0
StLNC0051	-1.14818	0.390813	no change	0	2	3	4	5	2
StLNC0656	-1.14359	0.384437	no change	4	7	0	4	14	7
StLNC1157	-1.14043	0.223499	no change	24	13	7	52	20	26
StLNC1240	-1.14042	0.502135	no change	0	18	4	5	4	25
StLNC0928	-1.14011	0.691336	no change	0	13	0	0	5	15
StLNC2105	-1.13609	0.430349	no change	0	13	8	13	5	18
StLNC0805	-1.13456	0.162932	no change	21	26	12	54	82	11
StLNC2043	-1.13056	0.572925	no change	4	0	8	17	14	0
StLNC1481	-1.12352	0.598247	no change	2	14	0	23	11	0
StLNC2586	-1.12078	0.463053	no change	2	7	0	4	3	9
StLNC2129	-1.11807	0.212518	no change	28	16	26	88	73	11
StLNC2833	-1.11474	0.0485614	down	9	16	17	34	44	16
StLNC1656	-1.11347	0.497793	no change	17	0	6	39	7	9
StLNC2072	-1.11237	0.0367699	down	145	179	154	436	548	139
StLNC0861	-1.11062	0.533878	no change	64	29	34	161	0	93
StLNC1982	-1.10536	0.683581	no change	0	0	7	10	6	0
StLNC0920	-1.10153	0.0363456	down	18	32	43	71	98	37
StLNC0169	-1.09681	0.578186	no change	3	5	0	0	10	7
StLNC1541	-1.09455	0.106299	no change	7	9	6	14	27	9
StLNC2778	-1.09295	0.268791	no change	21	27	44	19	46	102
StLNC1146	-1.09085	0.45451	no change	0	43	33	65	35	39
StLNC0910	-1.08675	0.321751	no change	6	8	1	18	11	4
StLNC0188	-1.08425	0.0227619	down	17	28	22	40	59	41
StLNC1439	-1.08385	0.602593	no change	6	6	0	15	0	8
StLNC2604	-1.08301	0.382031	no change	0	8	3	7	8	6
StLNC1182	-1.08091	0.586433	no change	0	19	0	13	12	9
StLNC0907	-1.08031	0.438678	no change	0	2	6	8	7	2
StLNC2665	-1.0773	0.622903	no change	0	43	0	35	44	7
StLNC2640	-1.07044	0.500054	no change	6	28	0	8	18	32
StLNC1231	-1.06947	0.106249	no change	6	16	17	35	31	15
StLNC1438	-1.06444	0.0461536	down	40	69	37	76	118	99
StLNC2265	-1.05901	0.191295	no change	3	5	4	9	10	6
StLNC2629	-1.05671	0.0485663	down	48	69	68	132	105	123
StLNC1245	-1.05502	0.603478	no change	4	0	7	0	16	9
StLNC1983	-1.05481	0.348327	no change	4	8	9	3	11	23
StLNC2701	-1.05175	0.122218	no change	6	16	13	29	36	10
StLNC2803	-1.05164	0.293088	no change	8	28	12	48	9	28
StLNC2736	-1.04641	0.21158	no change	15	21	17	68	35	10
StLNC2559	-1.04502	0.063328	no change	15	18	19	37	62	17
StLNC1873	-1.04273	0.16829	no change	50	83	171	289	140	155
StLNC1368	-1.03837	0.347783	no change	13	51	10	20	24	75
StLNC0748	-1.03592	0.153908	no change	65	34	83	137	99	126
StLNC0476	-1.03409	0.276806	no change	11	5	5	9	36	7
StLNC2788	-1.02134	0.640912	no change	3	0	4	0	2	10
StLNC2503	-1.01959	0.348007	no change	38	25	33	60	12	95
StLNC1512	-1.01371	0.0732893	no change	24	26	48	79	90	37
StLNC2462	-1.00892	0.00428629	down	87	110	98	182	317	127
StLNC2415	-1.00872	0.115344	no change	27	15	19	50	60	24
StLNC1777	-1.00833	0.440534	no change	0	10	15	9	21	16
StLNC2049	-1.00621	0.6131	no change	0	0	9	8	9	2
StLNC1785	-1.00508	0.212084	no change	10	10	6	10	39	10
StLNC0499	-1.00335	0.455098	no change	2	4	4	4	1	11
StLNC2484	-1.00319	0.42415	no change	0	7	4	4	9	7
StLNC0850	-0.999993	0.595692	no change	0	3	4	4	12	0
StLNC2047	-0.993729	0.367673	no change	422	394	26	449	779	522
StLNC2285	-0.992428	0.0346537	no change	15	27	23	46	60	26
StLNC1331	-0.988498	0.17206	no change	44	57	79	166	194	32
StLNC1584	-0.987092	0.53717	no change	20	7	6	44	37	0
StLNC0253	-0.983843	0.218863	no change	9	16	19	35	54	7
StLNC0101	-0.983437	0.147775	no change	17	8	16	26	43	19
StLNC0709	-0.981536	0.0868768	no change	13	17	16	34	49	14
StLNC0542	-0.976792	0.00898429	no change	1344	1380	1498	3282	3490	1816
StLNC0195	-0.976745	0.111523	no change	11	12	9	17	36	14
StLNC0495	-0.970094	0.563656	no change	3	10	1	0	24	6
StLNC2154	-0.96977	0.346978	no change	6	8	9	32	9	4
StLNC2690	-0.967617	0.195092	no change	8	30	13	41	25	25
StLNC1251	-0.96644	0.389991	no change	2	45	45	56	110	20
StLNC1771	-0.965249	0.743374	no change	0	4	9	0	0	17
StLNC1632	-0.962667	0.161314	no change	6	10	5	14	17	10
StLNC1652	-0.960631	0.561334	no change	10	52	0	12	35	52
StLNC0352	-0.958477	0.180068	no change	5	13	7	21	18	9
StLNC2843	-0.95443	0.10889	no change	21	16	15	36	37	29
StLNC2370	-0.951757	0.142671	no change	7	16	18	29	24	22
StLNC2642	-0.948742	0.448083	no change	0	8	14	13	19	9
StLNC0555	-0.948429	0.183238	no change	11	13	16	38	35	9
StLNC1597	-0.943718	0.73467	no change	9	0	0	10	15	0
StLNC2659	-0.943553	0.521226	no change	2	0	3	2	7	2
StLNC1065	-0.943263	0.0980178	no change	11	13	14	27	37	13
StLNC0858	-0.938895	0.543549	no change	1	0	9	4	11	5
StLNC1334	-0.935794	0.673262	no change	9	0	33	45	50	0
StLNC0730	-0.929713	0.599221	no change	4	7	3	0	2	18
StLNC1389	-0.929031	0.748168	no change	0	31	0	28	30	0
StLNC2836	-0.925738	0.488298	no change	8	0	11	10	18	11
StLNC0703	-0.925411	0.258852	no change	3	17	12	15	20	20
StLNC0423	-0.923643	0.757227	no change	0	0	27	17	0	23
StLNC2120	-0.92361	0.353549	no change	2	11	6	17	6	9
StLNC0503	-0.923352	0.80872	no change	0	0	5	9	0	0
StLNC0736	-0.916826	0.482547	no change	0	10	7	11	6	10
StLNC0606	-0.916239	0.0178316	no change	111	115	138	253	326	142
StLNC0379	-0.916002	0.250572	no change	4	6	6	12	16	4
StLNC0892	-0.913287	0.15402	no change	9	13	7	20	27	10
StLNC0458	-0.912639	0.0294518	no change	52	87	70	161	150	82
StLNC0565	-0.912333	0.344994	no change	18	40	7	13	74	37
StLNC0351	-0.908576	0.186636	no change	107	84	107	276	287	61
StLNC0269	-0.908391	0.0677277	no change	36	45	59	75	97	83
StLNC1758	-0.906017	0.199691	no change	12	11	11	19	44	9
StLNC1316	-0.905993	0.136532	no change	13	10	12	20	28	19
StLNC2278	-0.903065	0.296469	no change	35	62	10	91	88	29
StLNC0883	-0.90212	0.163757	no change	9	29	15	33	31	28
StLNC1638	-0.901811	0.387262	no change	7	3	4	11	18	2
StLNC1473	-0.899923	0.387361	no change	2	2	3	4	5	4
StLNC1680	-0.899704	0.660564	no change	0	146	1	123	43	55
StLNC0600	-0.899068	0.545768	no change	17	0	33	25	35	34
StLNC2011	-0.895525	0.526007	no change	0	11	23	12	45	10
StLNC2288	-0.892769	0.325726	no change	5	4	19	17	19	15
StLNC2324	-0.891888	0.26362	no change	5	4	5	7	13	7
StLNC0740	-0.891189	0.184966	no change	9	16	20	17	34	29
StLNC0784	-0.891124	0.511337	no change	2	3	9	20	5	1
StLNC0749	-0.881271	0.240869	no change	32	41	40	30	72	90
StLNC0241	-0.881002	0.0527171	no change	63	61	74	144	175	68
StLNC2558	-0.879143	0.65641	no change	0	6	0	2	3	4
StLNC1109	-0.877775	0.0130283	no change	527	901	821	1146	2260	895
StLNC1287	-0.874903	0.460119	no change	3	14	41	8	67	32
StLNC1460	-0.872069	0.0784359	no change	34	35	40	79	100	34
StLNC2033	-0.868018	0.273353	no change	14	17	53	69	54	30
StLNC0160	-0.867412	0.128661	no change	11	14	13	17	35	19
StLNC0799	-0.858379	0.119815	no change	40	86	60	101	212	50
StLNC0623	-0.847391	0.0644187	no change	31	33	34	56	69	51
StLNC2100	-0.84418	0.580277	no change	0	3	4	8	3	1
StLNC2114	-0.842821	0.329453	no change	7	6	24	19	41	12
StLNC2576	-0.839879	0.27618	no change	8	45	48	55	93	33
StLNC1820	-0.830925	0.353933	no change	4	9	16	7	34	13
StLNC0854	-0.830253	0.346452	no change	9	11	7	14	38	4
StLNC0750	-0.826484	0.0438715	no change	46	56	40	87	118	56
StLNC2211	-0.823558	0.32678	no change	70	170	365	249	785	150
StLNC2396	-0.818415	0.359647	no change	3	8	3	11	8	5
StLNC0222	-0.817806	0.665559	no change	265	554	263	572	1757	0
StLNC0193	-0.815875	0.392692	no change	6	15	4	8	35	6
StLNC0530	-0.812899	0.365954	no change	8	5	9	12	8	16
StLNC0419	-0.808884	0.226935	no change	7	12	12	25	21	9
StLNC1181	-0.808591	0.375158	no change	2	6	6	5	9	9
StLNC0948	-0.808502	0.779215	no change	0	30	0	24	28	0
StLNC1560	-0.808321	0.361994	no change	7	12	16	15	11	27
StLNC2078	-0.800553	0.0704929	no change	20	33	30	45	59	39
StLNC0729	-0.800009	0.600114	no change	1	2	3	7	4	0
StLNC2301	-0.797499	0.610886	no change	12	13	16	0	24	39
StLNC0773	-0.796936	0.543258	no change	6	0	7	7	12	6
StLNC1107	-0.784643	0.230619	no change	6	12	15	15	32	12
StLNC0114	-0.78428	0.351365	no change	8	4	5	7	15	9
StLNC2741	-0.780548	0.289165	no change	5	10	14	13	17	17
StLNC0314	-0.780374	0.716149	no change	0	8	18	19	0	16
StLNC0516	-0.77852	0.389004	no change	5	9	2	8	16	5
StLNC1014	-0.773355	0.203515	no change	14	12	10	20	26	17
StLNC1905	-0.771952	0.690549	no change	0	76	45	81	139	1
StLNC1710	-0.771294	0.436023	no change	3	5	17	7	21	14
StLNC2070	-0.766899	0.347182	no change	13	5	12	22	27	8
StLNC1532	-0.766111	0.065715	no change	60	92	75	144	194	67
StLNC1527	-0.765193	0.384499	no change	4	4	4	8	6	6
StLNC1764	-0.76281	0.209066	no change	10	26	17	27	52	15
StLNC2822	-0.759893	0.0507081	no change	301	498	434	832	943	374
StLNC0430	-0.758065	0.41531	no change	8	6	4	12	6	11
StLNC0443	-0.756833	0.199153	no change	54	55	43	110	137	35
StLNC2668	-0.756588	0.385007	no change	26	34	6	47	56	17
StLNC0768	-0.755318	0.552578	no change	2	4	2	1	4	7
StLNC2607	-0.748661	0.730473	no change	0	9	28	43	20	0
StLNC0550	-0.746593	0.29947	no change	10	15	9	27	26	7
StLNC2361	-0.743211	0.769771	no change	121	25	0	0	125	139
StLNC0643	-0.739859	0.3045	no change	6	8	13	19	21	7
StLNC2083	-0.734919	0.844573	no change	0	0	20	0	0	23
StLNC0138	-0.733806	0.627836	no change	0	51	54	41	48	59
StLNC2511	-0.732049	0.786451	no change	0	0	7	6	7	0
StLNC0829	-0.721189	0.847239	no change	20	0	0	0	0	29
StLNC2431	-0.71775	0.306667	no change	4	10	9	14	14	9
StLNC1687	-0.715291	0.680606	no change	41	97	0	93	18	79
StLNC1305	-0.713233	0.821106	no change	0	0	79	0	76	50
StLNC1858	-0.708044	0.338223	no change	5	8	7	7	19	8
StLNC0994	-0.706872	0.358057	no change	11	12	20	16	54	10
StLNC2675	-0.706059	0.851591	no change	0	11	0	0	0	11
StLNC1275	-0.704125	0.699864	no change	196	0	478	310	486	341
StLNC1272	-0.700568	0.318502	no change	13	14	9	20	37	8
StLNC2331	-0.698309	0.365749	no change	5	5	5	8	11	6
StLNC1955	-0.695294	0.183698	no change	15	29	21	42	46	19
StLNC0220	-0.686518	0.676944	no change	26	92	0	24	134	40
StLNC1741	-0.684321	0.809515	no change	0	0	9	0	4	8
StLNC0648	-0.684164	0.410294	no change	4	7	3	7	11	5
StLNC1559	-0.682545	0.260635	no change	163	130	140	353	210	146
StLNC1250	-0.679826	0.215377	no change	12	22	12	23	33	18
StLNC0685	-0.677428	0.785358	no change	35	0	1	42	38	0
StLNC1076	-0.675737	0.585557	no change	0	8	4	6	8	4
StLNC2258	-0.670806	0.455615	no change	6	4	7	4	17	8
StLNC1937	-0.669477	0.730838	no change	4	2	0	5	7	0
StLNC0877	-0.669126	0.858537	no change	13	0	0	0	35	0
StLNC1910	-0.669108	0.335947	no change	72	42	121	149	203	60
StLNC1416	-0.655113	0.698896	no change	0	19	17	4	6	31
StLNC1419	-0.647275	0.834243	no change	30	0	0	43	0	10
StLNC2753	-0.644944	0.714365	no change	166	112	136	286	529	0
StLNC1913	-0.641602	0.357946	no change	7	12	8	13	13	14
StLNC0944	-0.640008	0.411113	no change	7	7	11	10	12	15
StLNC1728	-0.638572	0.318764	no change	8	15	11	21	26	8
StLNC0177	-0.63514	0.245641	no change	39	38	34	65	53	51
StLNC0304	-0.633969	0.338327	no change	21	11	19	24	34	24
StLNC1408	-0.633546	0.625418	no change	1	21	16	4	51	9
StLNC1432	-0.625182	0.0502292	no change	205	255	293	391	503	284
StLNC0827	-0.625151	0.0836758	no change	52	80	76	115	146	67
StLNC1799	-0.624422	0.648603	no change	0	5	5	4	3	6
StLNC2643	-0.622677	0.186007	no change	24	33	40	43	62	43
StLNC0967	-0.622178	0.221964	no change	43	36	39	75	81	36
StLNC2107	-0.620928	0.61138	no change	1	7	1	3	6	4
StLNC0401	-0.616318	0.327626	no change	39	47	51	75	137	24
StLNC1723	-0.615949	0.54504	no change	5	9	7	13	3	12
StLNC1601	-0.614125	0.568272	no change	92	23	11	85	69	59
StLNC2112	-0.613623	0.683653	no change	8	0	10	3	23	7
StLNC1175	-0.612854	0.824887	no change	0	5	3	0	15	0
StLNC1627	-0.609099	0.255014	no change	88	77	87	82	220	107
StLNC0106	-0.608313	0.624032	no change	0	10	7	10	9	5
StLNC2470	-0.607484	0.399968	no change	26	38	30	72	69	13
StLNC1176	-0.604819	0.126351	no change	163	166	165	288	293	183
StLNC0154	-0.600473	0.184946	no change	24	37	34	48	53	40
StLNC2666	-0.599718	0.758611	no change	5	0	4	6	12	0
StLNC2202	-0.599518	0.723096	no change	3	4	15	0	7	20
StLNC2098	-0.595711	0.531656	no change	8	34	5	32	27	10
StLNC0561	-0.594315	0.367495	no change	6	10	8	11	15	10
StLNC0996	-0.593539	0.436085	no change	7	8	4	9	12	8
StLNC1102	-0.591951	0.766234	no change	3	0	5	0	8	5
StLNC1750	-0.588727	0.8429	no change	26	0	0	18	41	0
StLNC2589	-0.587897	0.840317	no change	0	36	0	26	27	0
StLNC0531	-0.584772	0.698881	no change	1	4	7	11	8	0
StLNC0067	-0.583264	0.601416	no change	1	7	5	2	11	6
StLNC1077	-0.582611	0.523728	no change	6	21	11	11	12	25
StLNC1845	-0.581955	0.43338	no change	5	14	6	9	18	10
StLNC2814	-0.576809	0.761785	no change	23	2	2	0	46	10
StLNC0776	-0.574919	0.350085	no change	51	68	58	58	84	103
StLNC1343	-0.573574	0.307745	no change	67	68	66	75	104	109
StLNC1701	-0.572948	0.558701	no change	10	68	17	27	33	56
StLNC0989	-0.568578	0.513026	no change	23	28	33	15	36	60
StLNC1027	-0.565052	0.729653	no change	96	101	0	108	122	74
StLNC0886	-0.563619	0.729771	no change	1	0	13	4	11	6
StLNC2699	-0.563033	0.880647	no change	0	0	20	28	0	0
StLNC1949	-0.561526	0.423921	no change	26	15	27	41	58	14
StLNC2123	-0.561475	0.700132	no change	0	31	31	33	51	9
StLNC0083	-0.559056	0.718241	no change	4	0	3	3	9	1
StLNC0821	-0.5582	0.349358	no change	8	18	11	16	24	14
StLNC1670	-0.556691	0.541413	no change	4	4	7	9	5	7
StLNC0628	-0.552188	0.527343	no change	22	17	70	63	95	19
StLNC1979	-0.54804	0.842839	no change	0	0	7	0	6	4
StLNC0696	-0.545457	0.557331	no change	35	12	13	39	57	10
StLNC2020	-0.535681	0.887345	no change	0	10	0	0	17	0
StLNC2487	-0.535168	0.811009	no change	3	7	0	13	1	0
StLNC1221	-0.533484	0.627056	no change	7	10	14	5	7	25
StLNC1199	-0.533375	0.767685	no change	5	7	26	50	4	0
StLNC2790	-0.532761	0.394395	no change	17	18	25	27	56	13
StLNC1823	-0.532257	0.873766	no change	0	226	0	225	67	0
StLNC0100	-0.531828	0.404556	no change	13	9	15	17	28	12
StLNC1338	-0.521998	0.867274	no change	0	0	27	34	0	2
StLNC1784	-0.521883	0.621422	no change	4	2	3	3	5	5
StLNC2709	-0.519387	0.434044	no change	225	211	489	573	672	186
StLNC1137	-0.515656	0.862183	no change	0	0	33	0	32	16
StLNC0532	-0.514648	0.587934	no change	3	6	3	7	9	2
StLNC1237	-0.512859	0.728001	no change	0	44	50	41	40	37
StLNC2514	-0.506006	0.739968	no change	5	0	8	5	3	9
StLNC1008	-0.505176	0.558181	no change	5	10	5	9	19	3
StLNC2768	-0.504818	0.711586	no change	2	21	18	1	38	18
StLNC1954	-0.503328	0.400271	no change	8	20	18	17	29	18
StLNC0825	-0.501832	0.420119	no change	13	23	26	40	37	13
StLNC0252	-0.500939	0.126637	no change	622	983	699	1089	1654	653
StLNC2384	-0.498947	0.731463	no change	3	8	9	0	22	8
StLNC2602	-0.495544	0.196588	no change	60	91	96	100	150	96
StLNC1002	-0.492816	0.52208	no change	7	8	8	13	8	10
StLNC1879	-0.491614	0.453216	no change	8	13	9	18	15	9
StLNC0513	-0.491483	0.409027	no change	31	41	34	68	72	19
StLNC0873	-0.490476	0.363327	no change	23	47	33	42	88	24
StLNC1786	-0.490141	0.800737	no change	5	0	5	7	11	0
StLNC2117	-0.489682	0.705802	no change	0	19	11	12	20	8
StLNC1815	-0.4872	0.809521	no change	6	0	5	0	10	7
StLNC2569	-0.484795	0.708416	no change	24	46	56	5	24	107
StLNC1843	-0.484302	0.216433	no change	49	62	61	89	113	48
StLNC0020	-0.478856	0.422092	no change	28	39	62	60	54	56
StLNC1012	-0.478675	0.513008	no change	11	14	8	23	14	9
StLNC2009	-0.474931	0.466756	no change	8	8	10	12	16	9
StLNC1912	-0.471818	0.505558	no change	6	20	11	14	30	9
StLNC2587	-0.468151	0.664361	no change	2	54	38	38	65	23
StLNC1270	-0.467627	0.592778	no change	11	5	10	20	12	6
StLNC0452	-0.466593	0.818269	no change	4	0	2	0	7	3
StLNC2255	-0.465872	0.532349	no change	52	78	85	47	89	130
StLNC1314	-0.463676	0.81865	no change	7	0	10	16	12	0
StLNC1330	-0.460235	0.650076	no change	2	8	10	12	15	2
StLNC0148	-0.458143	0.509432	no change	45	58	134	140	154	48
StLNC2185	-0.455197	0.820439	no change	0	0	6	3	3	2
StLNC2773	-0.45399	0.318481	no change	119	144	153	251	239	101
StLNC2670	-0.452053	0.664629	no change	5	4	2	8	6	2
StLNC0612	-0.451354	0.904178	no change	0	24	0	0	0	20
StLNC0779	-0.450125	0.581145	no change	4	8	7	12	7	6
StLNC2274	-0.448483	0.77204	no change	2	0	8	8	4	2
StLNC0155	-0.4474	0.90491	no change	20	0	0	0	0	24
StLNC0939	-0.447147	0.905133	no change	15	0	0	0	0	18
StLNC2724	-0.439953	0.777416	no change	0	82	67	79	50	47
StLNC0266	-0.438549	0.646034	no change	16	12	14	25	6	21
StLNC1345	-0.437939	0.48283	no change	11	14	15	20	30	8
StLNC2281	-0.437202	0.883026	no change	3	0	10	0	0	13
StLNC2224	-0.436427	0.809208	no change	17	2	156	4	293	13
StLNC0386	-0.43583	0.636495	no change	12	18	12	7	15	28
StLNC1835	-0.425271	0.638865	no change	6	6	19	20	19	5
StLNC1876	-0.422453	0.911065	no change	0	0	9	0	16	0
StLNC2685	-0.420262	0.848429	no change	8	2	0	2	18	0
StLNC0042	-0.419731	0.303827	no change	51	57	55	82	100	45
StLNC1253	-0.407121	0.574449	no change	25	43	27	51	77	11
StLNC0756	-0.407097	0.827836	no change	305	597	155	746	843	0
StLNC2523	-0.402885	0.620991	no change	10	10	13	23	20	4
StLNC2747	-0.401175	0.83439	no change	0	6	4	0	7	5
StLNC1576	-0.397351	0.626622	no change	41	52	11	45	83	23
StLNC0468	-0.396904	0.684499	no change	5	22	9	7	12	21
StLNC0694	-0.395046	0.630301	no change	7	5	12	13	9	9
StLNC1511	-0.391889	0.892851	no change	0	8	1	0	14	0
StLNC0723	-0.391838	0.645439	no change	13	16	14	6	24	24
StLNC2760	-0.391614	0.771956	no change	24	5	41	23	96	2
StLNC2138	-0.390228	0.839118	no change	0	5	4	0	9	3
StLNC0757	-0.389896	0.653803	no change	3	9	8	6	8	10
StLNC2077	-0.389561	0.893829	no change	0	24	0	14	0	9
StLNC2409	-0.389253	0.613175	no change	35	41	22	22	43	55
StLNC0547	-0.389012	0.384365	no change	25	40	26	39	52	29
StLNC0621	-0.388689	0.797921	no change	2	15	0	7	12	3
StLNC1838	-0.388283	0.520969	no change	13	15	10	16	20	14
StLNC0440	-0.388131	0.787317	no change	0	33	39	27	29	27
StLNC1699	-0.386662	0.563934	no change	8	15	11	9	26	11
StLNC2536	-0.385232	0.393891	no change	251	457	411	322	831	357
StLNC0733	-0.385088	0.571291	no change	12	10	10	11	17	14
StLNC0913	-0.384703	0.897917	no change	0	27	0	24	0	4
StLNC1112	-0.38465	0.518613	no change	13	21	20	26	39	10
StLNC2590	-0.375341	0.598	no change	9	9	9	13	20	5
StLNC2611	-0.372473	0.507752	no change	15	41	43	44	58	26
StLNC1277	-0.371424	0.503796	no change	193	127	279	248	380	191
StLNC0322	-0.370242	0.654213	no change	7	5	5	7	13	4
StLNC1048	-0.367478	0.605269	no change	5	12	12	10	22	7
StLNC1643	-0.366877	0.706256	no change	83	75	156	51	79	214
StLNC0116	-0.36498	0.498153	no change	35	25	32	45	51	28
StLNC0040	-0.36218	0.843336	no change	29	14	2	20	0	31
StLNC2633	-0.356626	0.696974	no change	79	37	78	23	183	75
StLNC2681	-0.356281	0.422746	no change	43	53	60	79	92	37
StLNC0529	-0.355154	0.533843	no change	15	35	27	36	30	27
StLNC0777	-0.354227	0.536741	no change	20	25	14	22	42	16
StLNC0905	-0.353179	0.566802	no change	16	16	22	29	21	18
StLNC1515	-0.352591	0.808379	no change	20	36	0	28	29	15
StLNC2076	-0.350557	0.632278	no change	6	13	11	18	11	8
StLNC1781	-0.35053	0.654579	no change	18	13	40	17	54	25
StLNC1385	-0.347758	0.624375	no change	7	10	10	11	21	5
StLNC0545	-0.346354	0.694132	no change	7	5	6	7	6	9
StLNC2218	-0.346098	0.74326	no change	2	9	15	4	24	7
StLNC0686	-0.34329	0.673173	no change	37	10	39	41	52	26
StLNC1674	-0.342484	0.874463	no change	0	27	9	19	0	15
StLNC0480	-0.340718	0.763306	no change	73	206	38	17	189	163
StLNC0381	-0.340267	0.677568	no change	31	17	22	25	21	38
StLNC1114	-0.332942	0.642418	no change	12	12	8	18	19	6
StLNC2012	-0.330622	0.67304	no change	9	6	10	15	10	7
StLNC2826	-0.326188	0.78635	no change	2	3	3	2	2	5
StLNC0451	-0.32388	0.808351	no change	5	8	0	6	8	3
StLNC1120	-0.317132	0.882951	no change	13	0	0	7	4	7
StLNC1319	-0.31607	0.815648	no change	3	6	8	7	18	0
StLNC2102	-0.315438	0.633699	no change	48	30	46	48	106	24
StLNC2217	-0.309729	0.734976	no change	47	81	9	49	95	35
StLNC1318	-0.308739	0.825944	no change	0	21	33	25	25	13
StLNC1422	-0.308237	0.934721	no change	11	0	0	0	23	0
StLNC1870	-0.306186	0.911967	no change	0	0	11	5	11	0
StLNC1658	-0.306117	0.766838	no change	2	8	6	2	10	7
StLNC0993	-0.305441	0.650907	no change	110	127	122	182	278	42
StLNC2631	-0.304884	0.574659	no change	80	71	132	91	203	81
StLNC0029	-0.303646	0.648927	no change	12	33	22	16	34	28
StLNC1600	-0.300909	0.627279	no change	15	19	18	20	19	22
StLNC1482	-0.300536	0.645705	no change	10	12	8	13	14	10
StLNC1675	-0.298091	0.677972	no change	17	10	19	27	23	10
StLNC2344	-0.296504	0.681418	no change	36	73	165	125	155	62
StLNC1798	-0.294561	0.748157	no change	18	22	89	71	38	40
StLNC0761	-0.294242	0.835559	no change	11	0	11	7	19	6
StLNC1844	-0.288457	0.751507	no change	5	4	4	7	5	4
StLNC1136	-0.28259	0.855015	no change	0	25	26	5	23	25
StLNC2839	-0.28105	0.658001	no change	8	18	16	18	27	8
StLNC0305	-0.280115	0.662979	no change	29	33	19	19	51	31
StLNC2787	-0.279096	0.923458	no change	0	0	19	4	25	0
StLNC0588	-0.278455	0.895055	no change	0	21	17	0	19	20
StLNC2297	-0.277777	0.494506	no change	2766	5367	4084	3485	7388	3958
StLNC0078	-0.274606	0.90366	no change	26	0	49	60	48	0
StLNC2063	-0.270758	0.522329	no change	35	45	38	40	67	38
StLNC2018	-0.267397	0.763752	no change	8	6	5	4	10	9
StLNC2121	-0.265987	0.92692	no change	0	10	0	2	0	6
StLNC2475	-0.262634	0.924901	no change	140	0	0	145	80	1
StLNC2279	-0.262061	0.749043	no change	12	14	7	19	20	4
StLNC0743	-0.261879	0.576807	no change	63	106	77	70	124	93
StLNC1985	-0.257617	0.834515	no change	18	35	22	2	24	49
StLNC0737	-0.255347	0.715176	no change	83	103	116	182	66	91
StLNC2061	-0.253985	0.683049	no change	10	11	14	14	22	8
StLNC1725	-0.253764	0.946776	no change	0	8	0	8	0	0
StLNC1816	-0.249303	0.590175	no change	34	35	39	50	56	27
StLNC0447	-0.247738	0.710948	no change	12	16	9	10	20	14
StLNC0634	-0.247268	0.813868	no change	10	17	6	3	35	7
StLNC2074	-0.245154	0.598691	no change	25	27	28	33	41	23
StLNC2149	-0.238831	0.800767	no change	29	47	59	9	105	51
StLNC1207	-0.234857	0.482351	no change	161	290	220	243	326	208
StLNC1348	-0.233457	0.749159	no change	22	14	28	19	25	29
StLNC1297	-0.232391	0.869386	no change	6	10	7	0	12	13
StLNC1872	-0.227122	0.779071	no change	21	71	44	37	32	65
StLNC1694	-0.225367	0.918807	no change	8	11	0	3	0	14
StLNC2307	-0.224707	0.60029	no change	2004	4231	3188	2676	6194	2481
StLNC1593	-0.223972	0.883751	no change	2	6	2	2	12	0
StLNC2065	-0.223848	0.866349	no change	6	9	0	6	8	4
StLNC1235	-0.222471	0.939003	no change	3	0	6	0	0	8
StLNC0836	-0.222136	0.758276	no change	38	23	61	49	91	21
StLNC2127	-0.21867	0.915986	no change	3	4	0	0	2	5
StLNC0365	-0.217631	0.939696	no change	0	0	11	4	0	6
StLNC0151	-0.216685	0.590952	no change	351	715	539	460	978	455
StLNC1997	-0.216458	0.944904	no change	0	0	63	46	0	17
StLNC2455	-0.214291	0.878687	no change	2	5	5	0	9	5
StLNC0728	-0.209146	0.820141	no change	9	19	18	16	42	3
StLNC2453	-0.206864	0.91348	no change	0	5	3	6	3	0
StLNC2621	-0.205084	0.74186	no change	8	24	24	19	30	15
StLNC2564	-0.204332	0.933374	no change	0	1	19	19	0	2
StLNC0982	-0.203757	0.64303	no change	34	39	45	51	60	29
StLNC0671	-0.202996	0.757123	no change	8	13	16	14	14	13
StLNC1945	-0.202548	0.849817	no change	12	8	40	14	13	33
StLNC1177	-0.199363	0.71995	no change	221	347	208	234	277	317
StLNC1317	-0.197723	0.668694	no change	41	74	40	64	81	36
StLNC1514	-0.197087	0.758858	no change	13	23	15	19	36	8
StLNC0221	-0.196392	0.85752	no change	44	9	11	27	60	8
StLNC0205	-0.19486	0.843427	no change	100	44	196	197	225	26
StLNC2672	-0.187436	0.813266	no change	13	29	24	8	45	23
StLNC1526	-0.185437	0.725243	no change	22	26	32	22	43	27
StLNC2158	-0.185161	0.896282	no change	6	14	6	0	22	9
StLNC1437	-0.184515	0.807036	no change	8	7	7	7	15	5
StLNC0061	-0.181392	0.730536	no change	52	68	66	95	96	31
StLNC0687	-0.181108	0.929263	no change	7	0	15	12	19	0
StLNC1000	-0.180185	0.932474	no change	0	12	10	20	3	0
StLNC1050	-0.179453	0.902774	no change	16	15	0	18	8	9
StLNC2605	-0.175948	0.927827	no change	0	4	6	0	5	5
StLNC0433	-0.175501	0.812275	no change	9	29	17	26	31	7
StLNC0697	-0.169277	0.821483	no change	6	15	6	9	16	6
StLNC0129	-0.165493	0.727263	no change	160	261	192	262	369	102
StLNC0096	-0.16519	0.906173	no change	2	5	4	0	7	5
StLNC0512	-0.162947	0.875249	no change	22	79	9	31	92	12
StLNC1953	-0.162915	0.728422	no change	31	50	44	44	49	42
StLNC1553	-0.158493	0.956956	no change	0	0	34	21	21	0
StLNC1347	-0.154563	0.863473	no change	18	7	16	16	10	18
StLNC0620	-0.154199	0.811733	no change	35	85	50	39	63	70
StLNC2637	-0.152478	0.958788	no change	21	0	0	21	10	0
StLNC1763	-0.151487	0.941428	no change	0	18	19	11	36	0
StLNC2593	-0.151249	0.892812	no change	41	18	47	19	13	68
StLNC0367	-0.146228	0.928706	no change	1	9	0	2	7	2
StLNC2551	-0.143216	0.86969	no change	7	4	7	5	13	4
StLNC2797	-0.139599	0.846384	no change	16	11	22	25	25	8
StLNC2750	-0.137631	0.846277	no change	19	17	22	19	46	8
StLNC2383	-0.135728	0.872133	no change	5	10	26	16	17	11
StLNC1868	-0.135274	0.936128	no change	2	5	8	1	20	0
StLNC0988	-0.131932	0.948471	no change	0	7	3	3	0	5
StLNC1414	-0.12611	0.8346	no change	19	57	24	34	55	21
StLNC1147	-0.125179	0.872295	no change	9	10	10	7	10	13
StLNC0119	-0.124304	0.942252	no change	22	20	2	0	23	24
StLNC0791	-0.120416	0.856995	no change	8	15	21	16	26	8
StLNC2101	-0.118698	0.884246	no change	3	8	8	6	8	6
StLNC2645	-0.116726	0.91498	no change	5	3	2	5	3	3
StLNC1703	-0.112212	0.865435	no change	10	18	10	18	15	8
StLNC1381	-0.110302	0.960911	no change	0	51	42	0	71	28
StLNC0422	-0.106433	0.896868	no change	5	10	8	4	11	9
StLNC2284	-0.104832	0.905039	no change	8	6	9	12	5	7
StLNC0930	-0.10242	0.847604	no change	98	122	194	134	270	78
StLNC2422	-0.0997743	0.92986	no change	67	33	41	53	139	4
StLNC1540	-0.099724	0.892088	no change	31	28	20	15	34	34
StLNC0816	-0.0990474	0.895324	no change	10	14	24	20	12	16
StLNC0418	-0.0973091	0.903141	no change	25	28	19	29	54	6
StLNC1193	-0.0971803	0.957214	no change	8	4	7	0	1	15
StLNC0660	-0.0953835	0.889288	no change	32	65	56	25	118	34
StLNC1681	-0.0951222	0.831574	no change	33	38	44	37	65	27
StLNC0038	-0.0948636	0.943722	no change	6	5	4	5	15	0
StLNC1467	-0.0938892	0.905024	no change	7	10	7	13	9	4
StLNC2696	-0.0927057	0.98022	no change	32	0	0	0	58	0
StLNC0946	-0.0902935	0.81678	no change	63	71	83	78	97	59
StLNC1776	-0.0891622	0.941298	no change	10	24	3	2	19	16
StLNC1320	-0.0782604	0.918957	no change	18	16	11	25	20	6
StLNC1603	-0.0774915	0.983598	no change	0	0	13	13	0	0
StLNC0535	-0.0770762	0.824413	no change	134	164	200	170	240	127
StLNC0196	-0.0761009	0.983761	no change	0	0	42	0	59	0
StLNC1732	-0.0746734	0.895793	no change	16	19	29	20	37	14
StLNC1282	-0.0717041	0.903853	no change	22	17	27	24	38	13
StLNC0137	-0.0644379	0.977941	no change	0	3	44	12	48	0
StLNC1950	-0.0642262	0.92839	no change	11	14	8	8	14	12
StLNC0187	-0.0627186	0.944551	no change	10	8	3	8	12	4
StLNC1618	-0.062398	0.924862	no change	10	12	12	9	14	12
StLNC1538	-0.0622308	0.924219	no change	10	12	10	14	13	7
StLNC2841	-0.0614198	0.954773	no change	5	4	3	2	4	6
StLNC1607	-0.0608382	0.914326	no change	28	29	33	44	34	18
StLNC0455	-0.0591491	0.902796	no change	18	28	23	22	31	19
StLNC2035	-0.0529995	0.939428	no change	16	30	29	21	19	30
StLNC2177	-0.0524624	0.934635	no change	12	17	20	10	25	16
StLNC2654	-0.0511307	0.958839	no change	10	63	36	60	46	7
StLNC0449	-0.0480929	0.952567	no change	12	14	5	14	15	5
StLNC2411	-0.0479584	0.963293	no change	11	16	3	8	25	3
StLNC1035	-0.0460273	0.958157	no change	20	29	54	20	23	49
StLNC0820	-0.0455495	0.927398	no change	22	32	29	22	37	26
StLNC1808	-0.0433239	0.909679	no change	226	288	227	300	349	147
StLNC1755	-0.0429684	0.965314	no change	16	55	33	64	40	5
StLNC2733	-0.0428286	0.978127	no change	8	0	18	11	19	2
StLNC2125	-0.0425823	0.945004	no change	43	74	74	101	70	28
StLNC0539	-0.0382326	0.968508	no change	16	23	37	54	13	9
StLNC2480	-0.0381974	0.973228	no change	30	39	30	3	99	19
StLNC1661	-0.0370577	0.958647	no change	7	11	9	11	14	4
StLNC2723	-0.0368672	0.99011	no change	0	1	6	0	0	5
StLNC0170	-0.0341442	0.992739	no change	17	0	0	21	0	0
StLNC0080	-0.0338875	0.974135	no change	3	4	3	2	4	4
StLNC0538	-0.0253201	0.985834	no change	2	6	6	3	14	0
StLNC1043	-0.021975	0.965316	no change	76	115	106	75	107	104
StLNC2662	-0.0212698	0.987473	no change	2	3	5	6	5	0
StLNC2634	-0.0196875	0.975707	no change	19	22	39	21	29	28
StLNC1967	-0.0178939	0.982468	no change	41	33	33	16	36	50
StLNC0255	-0.015336	0.984937	no change	22	36	37	14	27	44
StLNC1933	-0.0151323	0.99681	no change	0	11	0	0	13	0
StLNC0064	-0.0138883	0.983774	no change	33	25	16	21	30	25
StLNC2443	-0.0131916	0.992541	no change	7	12	5	0	12	11
StLNC0111	-0.0120915	0.993685	no change	7	6	15	4	33	0
StLNC2172	-0.0104918	0.99621	no change	24	35	0	0	40	22
StLNC2489	-0.00967868	0.983887	no change	279	625	520	374	862	272
StLNC1636	-0.00656471	0.992802	no change	8	30	16	24	18	10
StLNC1010	-0.00519899	0.993923	no change	377	498	430	635	680	120
StLNC1208	0.00249643	0.997416	no change	6	6	9	7	8	6
StLNC2533	0.00363022	0.997834	no change	4	9	4	5	15	0
StLNC2316	0.00500582	0.995549	no change	57	60	51	79	107	8
StLNC1968	0.00504878	0.996786	no change	3	1	5	5	2	2
StLNC1047	0.0060943	0.997764	no change	0	4	15	4	0	10
StLNC1485	0.00666945	0.992801	no change	11	8	8	7	13	8
StLNC1404	0.0085161	0.989903	no change	7	21	23	14	21	14
StLNC2691	0.00880892	0.988873	no change	20	19	18	22	32	8
StLNC2292	0.0118978	0.992159	no change	5	257	149	96	134	122
StLNC2430	0.0146264	0.9724	no change	113	150	145	118	148	126
StLNC0592	0.0146563	0.980794	no change	39	58	53	33	48	57
StLNC0127	0.0169057	0.971216	no change	127	193	122	190	157	90
StLNC2547	0.0201595	0.995741	no change	0	13	0	0	15	0
StLNC2050	0.0215601	0.971424	no change	9	16	14	13	15	10
StLNC2628	0.0217921	0.952566	no change	83	124	99	111	116	73
StLNC2075	0.0230119	0.993556	no change	6	0	0	0	6	2
StLNC1720	0.0258903	0.992422	no change	0	4	5	0	11	0
StLNC0249	0.0264266	0.992596	no change	0	3	6	0	0	6
StLNC0720	0.0283903	0.973806	no change	29	17	15	16	50	7
StLNC1964	0.0306734	0.967364	no change	8	7	7	7	9	6
StLNC1444	0.0338957	0.986794	no change	1	7	0	4	4	0
StLNC0124	0.0342668	0.9361	no change	75	102	104	105	137	47
StLNC0926	0.0355561	0.927501	no change	94	147	114	89	159	98
StLNC1996	0.0363986	0.957147	no change	10	14	11	9	12	12
StLNC1044	0.0364203	0.964213	no change	7	24	27	20	34	6
StLNC0325	0.0369265	0.943659	no change	25	47	43	30	41	36
StLNC1668	0.0400103	0.963242	no change	24	18	15	13	12	26
StLNC2748	0.0410868	0.957862	no change	40	95	65	86	110	14
StLNC2250	0.0450741	0.956978	no change	5	15	19	10	10	14
StLNC1089	0.0462865	0.981761	no change	2	2	3	0	9	0
StLNC1604	0.0498491	0.977893	no change	121	20	26	130	72	0
StLNC1907	0.0502432	0.959167	no change	8	10	10	11	19	1
StLNC0327	0.050661	0.94241	no change	49	42	23	55	41	20
StLNC0372	0.0561047	0.969686	no change	3	1	4	4	5	0
StLNC0471	0.0656876	0.940275	no change	24	80	57	70	85	9
StLNC1092	0.0720407	0.971824	no change	10	11	0	0	13	8
StLNC0213	0.0732523	0.918423	no change	25	13	20	21	32	9
StLNC0735	0.0775648	0.900269	no change	50	104	166	70	159	77
StLNC2695	0.0798548	0.968744	no change	0	8	8	0	15	2
StLNC2632	0.0812613	0.884188	no change	28	26	29	32	39	13
StLNC1863	0.0860424	0.952506	no change	3	8	10	15	5	0
StLNC2388	0.0874074	0.875488	no change	16	46	31	23	43	21
StLNC0633	0.0876881	0.966566	no change	16	24	0	22	21	0
StLNC2332	0.0890764	0.952564	no change	13	0	14	10	18	3
StLNC1187	0.0913083	0.907052	no change	8	15	5	7	14	6
StLNC0312	0.0925061	0.891966	no change	16	11	18	16	23	7
StLNC0859	0.0960609	0.872774	no change	31	48	39	56	37	18
StLNC2844	0.0976435	0.914764	no change	34	170	68	149	56	31
StLNC2056	0.0995967	0.794294	no change	113	162	131	150	143	86
StLNC0986	0.100919	0.855581	no change	14	31	29	19	28	20
StLNC1834	0.106383	0.938608	no change	18	15	10	16	34	0
StLNC1700	0.10811	0.815775	no change	60	64	48	62	70	34
StLNC0340	0.110987	0.677404	no change	524	813	769	636	854	471
StLNC1226	0.111496	0.959988	no change	16	0	0	10	7	2
StLNC1431	0.111914	0.906674	no change	33	16	44	8	43	36
StLNC2350	0.114859	0.801717	no change	62	106	78	68	134	40
StLNC0229	0.115484	0.855252	no change	20	23	13	17	18	16
StLNC1421	0.116511	0.761441	no change	143	236	183	208	215	102
StLNC1779	0.117127	0.949794	no change	47	0	9	46	14	3
StLNC1562	0.120425	0.914507	no change	507	2485	724	483	3358	171
StLNC1223	0.121881	0.844206	no change	66	85	41	42	67	62
StLNC2452	0.12343	0.957913	no change	0	0	29	19	3	3
StLNC2330	0.126636	0.97324	no change	0	14	0	0	15	0
StLNC0231	0.130951	0.896947	no change	2	5	4	4	4	2
StLNC1399	0.132144	0.751026	no change	124	143	153	139	203	68
StLNC1978	0.134414	0.811755	no change	20	30	25	31	23	14
StLNC1400	0.14062	0.97038	no change	0	0	10	0	12	0
StLNC0586	0.140762	0.749514	no change	149	243	176	143	187	163
StLNC1719	0.144443	0.894559	no change	4	7	30	5	18	13
StLNC2614	0.145036	0.916256	no change	4	4	3	0	8	3
StLNC1498	0.145897	0.829932	no change	21	39	51	42	23	28
StLNC0079	0.14593	0.878662	no change	51	53	77	44	149	8
StLNC0276	0.147202	0.625407	no change	16445	21198	19849	14738	27167	12278
StLNC2595	0.147887	0.840253	no change	42	60	45	15	80	42
StLNC1301	0.148191	0.780058	no change	169	150	120	178	155	81
StLNC1222	0.148906	0.852858	no change	4	10	6	6	8	4
StLNC1772	0.150914	0.928977	no change	75	23	0	54	36	14
StLNC0775	0.153214	0.830324	no change	318	327	114	280	367	107
StLNC0161	0.157058	0.85634	no change	9	27	36	30	11	17
StLNC1125	0.161366	0.868577	no change	4	4	4	5	4	2
StLNC0286	0.170095	0.726518	no change	90	208	177	116	154	128
StLNC1615	0.179151	0.915238	no change	0	18	16	3	3	16
StLNC0289	0.179561	0.733137	no change	284	470	228	289	504	140
StLNC0953	0.184637	0.811961	no change	9	15	31	21	22	7
StLNC2582	0.19286	0.922226	no change	0	8	6	0	4	6
StLNC2264	0.19308	0.946233	no change	0	10	2	9	0	0
StLNC0563	0.194207	0.778334	no change	14	31	10	14	20	13
StLNC2477	0.20072	0.817418	no change	8	9	8	12	9	2
StLNC0788	0.201968	0.9372	no change	236	287	0	176	395	0
StLNC2825	0.204903	0.896463	no change	0	6	28	15	6	6
StLNC1995	0.207023	0.768386	no change	14	24	12	10	15	16
StLNC0607	0.208568	0.870698	no change	4	1	3	2	5	1
StLNC0334	0.214571	0.914214	no change	46	0	4	3	8	31
StLNC1180	0.219843	0.851262	no change	8	5	3	3	13	1
StLNC2021	0.221156	0.77371	no change	12	26	12	16	9	14
StLNC0868	0.221619	0.727863	no change	54	55	38	65	45	21
StLNC0310	0.224562	0.901571	no change	1	41	1	27	4	1
StLNC0700	0.228418	0.714463	no change	21	47	17	26	28	17
StLNC1519	0.230288	0.871079	no change	4	5	6	6	0	5
StLNC2026	0.238167	0.524178	no change	71	121	97	86	118	48
StLNC0594	0.24753	0.593649	no change	269	349	348	290	243	244
StLNC1899	0.249035	0.824016	no change	10	36	17	4	53	5
StLNC0971	0.249967	0.913236	no change	18	0	60	0	37	29
StLNC1129	0.250754	0.771452	no change	4	7	7	3	7	5
StLNC0173	0.256001	0.909188	no change	0	4	12	11	0	1
StLNC0641	0.257958	0.89464	no change	0	3	5	0	3	3
StLNC1848	0.258523	0.75209	no change	26	8	29	18	28	12
StLNC0500	0.260167	0.68591	no change	71	109	82	90	44	67
StLNC1015	0.26264	0.667109	no change	15	27	14	12	20	14
StLNC2323	0.266535	0.894978	no change	9	0	13	12	10	0
StLNC0317	0.269284	0.789512	no change	10	7	2	5	8	4
StLNC1866	0.270187	0.70223	no change	96	163	152	191	70	64
StLNC1793	0.270533	0.852108	no change	5	10	3	0	14	3
StLNC1780	0.27307	0.705924	no change	8	9	12	10	11	4
StLNC0342	0.275289	0.828028	no change	9	8	6	8	15	0
StLNC1956	0.2771	0.922113	no change	9	0	0	6	4	0
StLNC0121	0.288555	0.888505	no change	9	0	4	0	9	4
StLNC0197	0.289983	0.762402	no change	4	6	10	4	4	7
StLNC0278	0.291563	0.649519	no change	17	63	43	40	42	17
StLNC2852	0.299723	0.521851	no change	98	152	125	104	177	47
StLNC0400	0.300552	0.754841	no change	6	5	3	3	6	3
StLNC0387	0.304053	0.755427	no change	4	4	4	4	4	2
StLNC0642	0.305077	0.656302	no change	18	48	25	36	22	13
StLNC1531	0.305994	0.873525	no change	4	0	6	4	6	0
StLNC1533	0.308547	0.688783	no change	14	17	6	12	13	6
StLNC1621	0.310469	0.850073	no change	39	131	0	35	78	26
StLNC0557	0.312023	0.566127	no change	15	29	22	20	24	10
StLNC1654	0.315744	0.7343	no change	6	8	3	3	7	4
StLNC0707	0.3215	0.880977	no change	0	42	8	12	31	0
StLNC1020	0.324595	0.773547	no change	183	289	13	147	114	110
StLNC1825	0.325471	0.669491	no change	8	11	10	8	6	8
StLNC1904	0.328468	0.517997	no change	29	28	28	20	32	18
StLNC2504	0.328506	0.716396	no change	7	28	27	8	39	7
StLNC2738	0.329666	0.57338	no change	102	68	122	88	78	67
StLNC0260	0.330985	0.621423	no change	27	59	39	25	26	38
StLNC1458	0.331681	0.905925	no change	7	0	0	3	5	0
StLNC2457	0.333569	0.820224	no change	11	30	0	8	18	7
StLNC1469	0.334873	0.759401	no change	46	9	11	25	12	18
StLNC1948	0.337495	0.862438	no change	0	8	3	0	5	3
StLNC2442	0.338209	0.680757	no change	16	17	12	12	26	3
StLNC0837	0.343048	0.720509	no change	6	21	7	3	12	10
StLNC1952	0.349182	0.500892	no change	30	65	45	25	51	32
StLNC0889	0.349939	0.701235	no change	3	7	6	4	7	2
StLNC1139	0.354649	0.465619	no change	109	195	159	123	211	54
StLNC1013	0.356988	0.776148	no change	5	8	1	1	6	4
StLNC0659	0.357368	0.458622	no change	81	167	101	62	149	67
StLNC2809	0.357883	0.813027	no change	22	40	0	15	14	16
StLNC0629	0.358822	0.678569	no change	7	6	6	6	8	2
StLNC0991	0.361358	0.347073	no change	91	123	110	93	124	47
StLNC1308	0.363068	0.856469	no change	0	3	9	2	9	0
StLNC1733	0.363735	0.532777	no change	67	130	78	74	54	68
StLNC0551	0.365127	0.817706	no change	37	25	20	41	0	18
StLNC2426	0.366698	0.6667	no change	25	40	55	31	70	6
StLNC1212	0.373208	0.823438	no change	11	14	1	4	22	0
StLNC2092	0.376217	0.511455	no change	48	35	32	31	46	19
StLNC2126	0.376423	0.919821	no change	0	0	47	0	0	25
StLNC2040	0.376431	0.893631	no change	0	20	0	5	11	0
StLNC0021	0.38176	0.91859	no change	0	0	68	0	0	36
StLNC1455	0.388733	0.681844	no change	5	12	5	2	10	5
StLNC0846	0.390538	0.768463	no change	38	23	11	1	22	30
StLNC1315	0.395501	0.917006	no change	0	11	0	7	0	0
StLNC0490	0.395843	0.614915	no change	56	43	27	39	20	33
StLNC1975	0.396058	0.476266	no change	34	51	29	19	44	25
StLNC2527	0.397129	0.593258	no change	13	17	23	19	20	4
StLNC2458	0.397178	0.673048	no change	7	11	7	4	4	9
StLNC2148	0.397372	0.56861	no change	55	82	77	71	94	14
StLNC0444	0.398241	0.794928	no change	17	12	25	14	0	20
StLNC1005	0.399502	0.606052	no change	14	20	17	15	25	3
StLNC2413	0.400603	0.336901	no change	39	61	52	42	53	23
StLNC0371	0.401383	0.693285	no change	17	16	18	9	4	20
StLNC1696	0.402672	0.885571	no change	0	6	4	0	0	5
StLNC0283	0.406083	0.425315	no change	24	43	24	23	30	16
StLNC0575	0.407122	0.849918	no change	0	44	8	12	30	0
StLNC2729	0.407176	0.913893	no change	0	0	17	0	17	0
StLNC0585	0.41187	0.837739	no change	6	5	0	0	8	2
StLNC2032	0.412415	0.88538	no change	13	12	0	0	27	0
StLNC1081	0.416709	0.742682	no change	5	5	9	5	12	0
StLNC1865	0.417985	0.408587	no change	64	122	83	48	78	66
StLNC2456	0.418309	0.820613	no change	0	7	6	5	5	0
StLNC0295	0.424872	0.276023	no change	80	110	97	65	84	62
StLNC1859	0.426482	0.829716	no change	0	13	6	0	6	6
StLNC1608	0.435664	0.582381	no change	13	37	14	14	11	17
StLNC2630	0.43578	0.331488	no change	126	163	178	126	110	98
StLNC1821	0.436726	0.473759	no change	19	15	20	13	17	11
StLNC0809	0.43753	0.552897	no change	11	13	25	17	14	6
StLNC0149	0.446901	0.432225	no change	15	26	17	15	16	11
StLNC2366	0.448692	0.878419	no change	0	13	20	0	0	16
StLNC2071	0.453875	0.458421	no change	128	256	196	156	92	134
StLNC2794	0.455106	0.563346	no change	26	28	12	8	24	17
StLNC2082	0.455844	0.659212	no change	63	9	88	33	42	43
StLNC0603	0.459289	0.875403	no change	16	25	0	0	41	0
StLNC2667	0.4606	0.404857	no change	104	139	104	77	71	88
StLNC2110	0.467318	0.771846	no change	53	103	100	0	110	72
StLNC1867	0.468701	0.59858	no change	15	12	35	22	23	4
StLNC0463	0.47152	0.81918	no change	1	19	1	1	0	9
StLNC1299	0.473155	0.748793	no change	4	4	8	0	3	7
StLNC0357	0.474253	0.597004	no change	6	57	45	22	26	22
StLNC2501	0.476326	0.696446	no change	3	6	5	5	6	0
StLNC1522	0.476442	0.240512	no change	107	135	135	112	108	56
StLNC2660	0.477783	0.783513	no change	17	1	9	17	6	0
StLNC0851	0.480949	0.210151	no change	96	158	128	79	110	79
StLNC2238	0.481193	0.607177	no change	4	6	9	2	8	4
StLNC2811	0.486527	0.691884	no change	9	7	9	9	12	0
StLNC0834	0.491206	0.814746	no change	0	10	5	0	11	1
StLNC2133	0.496778	0.467549	no change	11	12	13	10	13	4
StLNC1121	0.506542	0.819439	no change	4	1	6	0	0	6
StLNC0618	0.507072	0.457508	no change	20	44	43	16	54	12
StLNC1891	0.508228	0.454022	no change	10	22	13	8	19	6
StLNC1398	0.513318	0.80203	no change	275	32	37	0	33	184
StLNC2780	0.516265	0.572601	no change	763	4402	3291	790	4768	885
StLNC2739	0.51835	0.782751	no change	31	2	4	4	36	0
StLNC0465	0.518642	0.89088	no change	0	0	13	0	12	0
StLNC0179	0.524167	0.240965	no change	40	61	47	34	38	29
StLNC0635	0.526636	0.804581	no change	4	8	2	0	0	7
StLNC0343	0.52868	0.632304	no change	78	85	84	82	117	3
StLNC1751	0.531015	0.526161	no change	29	38	18	8	21	26
StLNC1977	0.531783	0.716954	no change	4	7	10	10	0	3
StLNC2793	0.532099	0.796983	no change	7	12	8	18	0	0
StLNC2048	0.537663	0.810737	no change	6	13	33	34	0	0
StLNC1465	0.538579	0.885503	no change	0	0	48	0	44	0
StLNC2268	0.5468	0.847311	no change	0	0	12	2	8	0
StLNC2535	0.549591	0.603447	no change	5	37	8	4	20	9
StLNC1744	0.55316	0.536269	no change	190	226	278	87	72	238
StLNC0762	0.553945	0.784813	no change	0	12	14	13	4	0
StLNC2019	0.554622	0.460249	no change	10	10	12	10	10	3
StLNC1243	0.556984	0.117627	no change	119	158	130	104	117	61
StLNC0576	0.562546	0.517557	no change	5	11	5	6	5	3
StLNC2727	0.571288	0.259053	no change	37	47	59	40	34	22
StLNC0965	0.571551	0.583343	no change	11	53	13	16	6	20
StLNC0491	0.572541	0.798166	no change	9	30	0	22	3	0
StLNC0110	0.572751	0.205433	no change	57	71	62	31	69	33
StLNC2399	0.574746	0.281651	no change	43	125	87	52	61	48
StLNC2347	0.575055	0.560507	no change	10	8	6	3	14	2
StLNC1586	0.578107	0.622938	no change	1	5	7	3	5	1
StLNC1610	0.583514	0.823288	no change	39	1	0	2	42	0
StLNC1486	0.591849	0.533019	no change	3	11	5	5	4	3
StLNC0446	0.594375	0.308565	no change	18	19	20	11	21	8
StLNC2229	0.594981	0.842228	no change	0	0	26	2	20	0
StLNC1122	0.59938	0.386103	no change	31	21	22	24	17	10
StLNC2471	0.601075	0.761757	no change	8	0	12	8	8	0
StLNC1671	0.602257	0.833597	no change	12	0	0	3	9	0
StLNC2718	0.603142	0.747254	no change	137	0	12	20	72	33
StLNC0669	0.613877	0.121751	no change	53	95	88	46	76	35
StLNC1630	0.618194	0.5779	no change	75	84	53	107	10	17
StLNC1958	0.626009	0.283699	no change	35	60	39	28	24	29
StLNC0595	0.628429	0.666526	no change	32	32	36	0	48	22
StLNC2765	0.633909	0.643172	no change	29	50	44	70	5	2
StLNC0153	0.638166	0.649023	no change	7	8	3	0	5	6
StLNC2249	0.640453	0.661357	no change	4	74	12	3	7	31
StLNC2159	0.6455	0.283401	no change	27	26	24	16	30	8
StLNC2689	0.651395	0.594273	no change	7	17	11	10	15	0
StLNC1049	0.654019	0.861172	no change	0	0	52	0	44	0
StLNC2856	0.655181	0.83923	no change	0	0	52	0	42	1
StLNC2434	0.656753	0.759768	no change	13	0	20	0	23	4
StLNC0580	0.657933	0.814465	no change	5	0	7	8	0	0
StLNC0251	0.659214	0.781662	no change	24	55	0	5	0	31
StLNC1919	0.659567	0.862545	no change	0	0	9	0	0	4
StLNC2676	0.661231	0.339441	no change	12	18	14	5	14	9
StLNC2251	0.664898	0.496575	no change	8	13	6	2	14	3
StLNC0006	0.665458	0.206635	no change	80	139	106	55	65	71
StLNC2556	0.670916	0.7299	no change	0	13	7	3	11	0
StLNC0030	0.67278	0.338027	no change	32	22	36	24	32	7
StLNC2402	0.673462	0.427315	no change	53	52	64	19	99	11
StLNC0056	0.674853	0.763213	no change	0	40	84	38	46	0
StLNC0482	0.681515	0.74856	no change	0	13	25	8	0	10
StLNC0338	0.682812	0.855584	no change	0	0	29	0	24	0
StLNC1196	0.6864	0.0313506	no change	204	350	281	155	226	135
StLNC2001	0.686709	0.393519	no change	10	19	20	5	10	13
StLNC0670	0.687085	0.854238	no change	0	0	52	0	43	0
StLNC2360	0.688764	0.671784	no change	0	10	4	1	2	4
StLNC0003	0.689807	0.0107388	no change	471	675	645	360	480	277
StLNC0848	0.692067	0.493808	no change	10	42	51	8	15	30
StLNC0353	0.697865	0.298301	no change	33	41	30	22	43	7
StLNC0682	0.697926	0.318006	no change	33	64	50	14	34	36
StLNC2538	0.700472	0.164898	no change	29	38	33	15	31	17
StLNC0665	0.702829	0.739216	no change	6	9	0	1	11	0
StLNC2783	0.705522	0.290379	no change	40	158	94	43	61	58
StLNC2096	0.70768	0.684655	no change	3	1	10	2	0	5
StLNC0005	0.709794	0.242854	no change	42	36	23	21	31	14
StLNC0130	0.715309	0.548311	no change	13	15	4	14	2	3
StLNC0413	0.71596	0.502214	no change	14	11	7	5	18	1
StLNC0636	0.717345	0.682025	no change	8	11	1	1	15	0
StLNC1914	0.723323	0.647048	no change	1	1	19	1	8	4
StLNC1313	0.727747	0.555719	no change	13	13	12	14	12	0
StLNC2613	0.729344	0.376488	no change	15	23	16	14	20	2
StLNC2567	0.729789	0.645137	no change	2	4	4	0	1	4
StLNC2561	0.732933	0.715121	no change	0	13	25	10	15	0
StLNC0813	0.733087	0.223136	no change	12	20	22	9	16	8
StLNC2146	0.73695	0.787513	no change	0	6	7	7	0	0
StLNC1944	0.738347	0.643155	no change	9	21	0	2	6	8
StLNC0018	0.738477	0.550829	no change	48	11	67	40	4	26
StLNC2700	0.74205	0.795186	no change	15	17	0	0	27	0
StLNC1151	0.74488	0.576197	no change	5	15	6	0	9	6
StLNC2616	0.746111	0.0860407	no change	246	465	315	171	225	187
StLNC2342	0.750118	0.576573	no change	15	41	26	22	33	0
StLNC0388	0.751297	0.446442	no change	15	34	22	5	8	22
StLNC0133	0.753558	0.681434	no change	25	627	175	16	576	1
StLNC1169	0.755194	0.0662992	no change	204	323	212	114	191	128
StLNC0019	0.756026	0.84064	no change	0	26	0	0	18	0
StLNC1521	0.760111	0.576868	no change	4	6	5	0	3	5
StLNC0880	0.770256	0.40936	no change	4	10	5	5	4	2
StLNC1716	0.7742	0.29422	no change	6	18	13	6	9	6
StLNC1830	0.77455	0.409905	no change	14	18	18	2	13	13
StLNC0354	0.780964	0.646949	no change	10	14	1	0	16	2
StLNC0055	0.784984	0.112503	no change	79	115	65	41	61	46
StLNC2821	0.787049	0.63253	no change	0	67	16	24	7	9
StLNC1493	0.790687	0.442127	no change	68	63	45	56	59	3
StLNC1490	0.791545	0.499211	no change	8	8	9	6	11	0
StLNC2143	0.792646	0.491572	no change	3	7	2	3	3	1
StLNC2327	0.795818	0.778443	no change	0	6	12	0	0	7
StLNC0122	0.79679	0.682984	no change	0	4	8	0	5	2
StLNC1074	0.797686	0.703762	no change	0	21	3	0	7	5
StLNC2215	0.801574	0.202506	no change	81	174	110	50	59	79
StLNC1809	0.803038	0.0189422	no change	87	137	113	62	84	48
StLNC1704	0.804256	0.699716	no change	5	2	4	0	0	5
StLNC2124	0.806329	0.169363	no change	174	283	231	72	155	145
StLNC2749	0.807425	0.720677	no change	0	28	74	42	16	0
StLNC0459	0.808814	0.511629	no change	3	5	6	3	6	0
StLNC0852	0.810941	0.629673	no change	53	92	48	87	0	14
StLNC1380	0.817003	0.550387	no change	39	10	68	8	4	42
StLNC2608	0.823631	0.191926	no change	26	21	24	11	25	8
StLNC1335	0.825026	0.0304688	no change	540	982	768	329	576	367
StLNC0494	0.82799	0.774213	no change	14	0	21	0	29	0
StLNC1093	0.837208	0.607992	no change	173	169	200	150	214	0
StLNC1669	0.839677	0.388329	no change	5	18	12	3	5	9
StLNC0011	0.841483	0.16239	no change	107	312	200	79	225	61
StLNC0691	0.847426	0.556443	no change	5	11	18	10	0	6
StLNC2180	0.851577	0.128463	no change	38	34	48	18	40	14
StLNC1415	0.853782	0.199902	no change	9	16	17	8	9	6
StLNC0611	0.855992	0.429401	no change	8	8	3	2	3	5
StLNC1549	0.856236	0.819687	no change	21	0	0	14	0	0
StLNC2804	0.85737	0.360348	no change	5	7	7	5	5	1
StLNC0290	0.862714	0.818476	no change	0	28	0	0	18	0
StLNC2565	0.866627	0.516509	no change	9	7	4	0	8	4
StLNC1887	0.866746	0.233635	no change	28	61	32	25	41	6
StLNC0521	0.866794	0.0502018	no change	79	164	107	75	75	40
StLNC2712	0.879358	0.67979	no change	2	7	12	0	0	8
StLNC0906	0.880888	0.487894	no change	2	20	9	1	5	8
StLNC0384	0.882527	0.335052	no change	8	17	8	4	4	8
StLNC2677	0.883084	0.334944	no change	31	54	212	49	53	49
StLNC1131	0.884635	0.451002	no change	6	6	7	4	8	0
StLNC1639	0.89209	0.217913	no change	17	34	45	9	21	19
StLNC2441	0.892419	0.618306	no change	155	232	55	207	37	0
StLNC0250	0.89778	0.494469	no change	3	8	4	0	5	3
StLNC0908	0.898194	0.689516	no change	0	61	53	0	55	11
StLNC1657	0.900453	0.339	no change	18	47	118	16	35	38
StLNC0462	0.901131	0.0439192	no change	31	51	45	21	32	16
StLNC0929	0.90446	0.748517	no change	7	8	0	0	0	6
StLNC1935	0.906293	0.752486	no change	2	0	8	0	0	4
StLNC0781	0.907347	0.0522213	no change	47	68	42	27	35	22
StLNC0765	0.908738	0.734328	no change	1	0	58	0	40	1
StLNC2017	0.908902	0.454024	no change	8	2	7	2	8	1
StLNC0774	0.915488	0.687487	no change	1	14	0	1	8	0
StLNC0909	0.917251	0.141158	no change	17	19	26	10	19	6
StLNC0408	0.920432	0.297785	no change	8	26	6	6	8	6
StLNC2781	0.925466	0.63978	no change	11	6	7	0	18	0
StLNC0978	0.927139	0.688369	no change	0	33	32	29	2	0
StLNC1641	0.927663	0.753794	no change	0	15	39	26	0	0
StLNC2820	0.929888	0.77196	no change	0	6	83	0	0	32
StLNC2756	0.930725	0.370502	no change	7	5	5	5	2	2
StLNC1957	0.931327	0.466921	no change	4	6	9	0	6	4
StLNC2407	0.933994	0.288362	no change	6	8	6	3	6	2
StLNC1718	0.94215	0.0097015	no change	73	128	102	50	72	37
StLNC2647	0.943079	0.399039	no change	2	5	5	2	2	2
StLNC0568	0.955809	0.286912	no change	7	14	19	3	7	9
StLNC0331	0.955867	0.0101461	no change	342	547	431	179	294	198
StLNC2594	0.957719	0.553459	no change	18	139	36	25	89	0
StLNC0484	0.961014	0.296034	no change	74	63	54	15	98	10
StLNC1124	0.962396	0.330459	no change	9	18	14	3	4	11
StLNC2745	0.969846	0.27222	no change	7	7	9	6	4	2
StLNC2163	0.991538	0.794586	no change	0	12	0	0	7	0
StLNC1730	0.995466	0.521438	no change	3	12	11	1	15	0
StLNC0385	0.995572	0.359011	no change	19	23	2	6	11	6
StLNC1778	0.996184	0.490716	no change	0	16	15	7	4	3
StLNC1836	0.999725	0.448218	no change	48	78	82	56	1	32
StLNC1071	1.00412	0.107559	no change	32	80	47	18	52	14
StLNC0501	1.00438	0.414143	no change	13	9	12	6	15	0
StLNC2253	1.00718	0.661485	no change	35	0	33	33	5	0
StLNC1144	1.01579	0.402684	no change	151	290	205	156	205	3
StLNC1628	1.01677	0.129104	no change	12	15	13	7	8	5
StLNC1752	1.01754	0.485084	no change	1	5	4	3	2	0
StLNC1800	1.03178	0.649761	no change	29	0	6	0	22	3
StLNC2010	1.03909	0.0100719	up	567	846	804	249	575	284
StLNC0142	1.04462	0.538744	no change	99	149	15	86	55	0
StLNC0569	1.0488	0.515166	no change	68	111	92	54	0	53
StLNC1292	1.05164	0.251194	no change	11	9	24	9	4	7
StLNC1361	1.05197	0.422384	no change	3	5	4	4	2	0
StLNC1262	1.05317	0.561212	no change	0	3	41	13	4	3
StLNC2305	1.05937	0.548146	no change	1	75	1	2	16	13
StLNC2232	1.06108	0.635685	no change	19	20	3	0	0	15
StLNC0509	1.06128	0.054934	no change	22	50	29	15	24	10
StLNC2649	1.06303	0.547602	no change	144	0	46	20	47	37
StLNC1973	1.06559	0.42398	no change	5	9	8	5	0	4
StLNC0300	1.0721	0.0913666	no change	15	32	33	12	12	12
StLNC0081	1.07548	0.27577	no change	12	5	8	3	4	5
StLNC1396	1.08675	0.602751	no change	2	14	12	12	0	0
StLNC0667	1.09004	0.700241	no change	0	22	24	0	27	0
StLNC2200	1.09632	0.281674	no change	3	11	7	2	3	4
StLNC1154	1.09663	0.138681	no change	177	172	172	61	205	26
StLNC0150	1.09689	0.447279	no change	1	11	6	3	6	0
StLNC2641	1.09884	0.625684	no change	1	119	105	0	2	67
StLNC1407	1.10278	0.0142533	up	39	64	57	21	32	21
StLNC0428	1.11525	0.0527021	no change	37	58	72	16	47	18
StLNC2254	1.1163	0.768992	no change	0	14	0	0	0	4
StLNC1132	1.12096	0.392281	no change	5	5	6	0	3	4
StLNC2155	1.13918	0.0318511	up	160	267	220	111	168	38
StLNC0742	1.14225	0.679478	no change	8	17	0	0	15	0
StLNC0297	1.14765	0.0244153	up	29	48	35	13	27	12
StLNC0053	1.14855	0.0959116	no change	24	29	19	10	9	12
StLNC1561	1.16155	0.670357	no change	8	0	7	0	10	0
StLNC0932	1.17038	0.346773	no change	8	13	12	0	12	4
StLNC2201	1.17271	0.170176	no change	26	9	22	6	15	7
StLNC1663	1.17904	0.752967	no change	0	0	46	0	27	0
StLNC0350	1.18505	0.21382	no change	9	27	26	5	5	13
StLNC2597	1.18614	0.204605	no change	23	54	16	7	9	19
StLNC1326	1.18667	0.0867961	no change	16	20	13	6	13	4
StLNC0358	1.19158	0.137581	no change	11	13	7	5	6	3
StLNC1410	1.19303	0.315414	no change	10	22	10	10	10	0
StLNC2854	1.20634	0.0986157	no change	17	20	21	7	18	3
StLNC2612	1.20664	0.514808	no change	0	7	6	2	4	0
StLNC1810	1.20996	0.565493	no change	3	12	0	2	0	3
StLNC1472	1.2124	0.0896012	no change	32	40	25	18	24	4
StLNC2298	1.22211	0.351683	no change	5	4	4	4	2	0
StLNC1894	1.22235	0.0252023	up	84	112	82	34	37	42
StLNC1091	1.22375	0.327571	no change	12	21	22	16	9	0
StLNC1376	1.22463	0.648783	no change	270	0	526	287	0	48
StLNC2508	1.22855	0.131113	no change	8	13	9	6	5	2
StLNC0935	1.23167	0.0518535	no change	24	53	40	13	15	18
StLNC1273	1.23388	0.211824	no change	10	26	46	20	5	7
StLNC0915	1.24284	0.11413	no change	10	10	17	7	6	3
StLNC2315	1.24917	0.53301	no change	8	17	15	16	0	0
StLNC0528	1.25535	0.742666	no change	8	0	0	0	0	3
StLNC0370	1.26064	0.124469	no change	7	9	12	3	6	3
StLNC2573	1.2713	0.0200966	up	26	50	50	21	23	9
StLNC0492	1.27188	0.127427	no change	21	24	18	4	22	4
StLNC1353	1.27433	0.408022	no change	77	81	23	3	2	52
StLNC1918	1.28072	0.523264	no change	2	5	11	7	0	0
StLNC1127	1.28152	0.00557176	up	74	143	168	52	74	34
StLNC2094	1.28994	0.0753863	no change	55	28	41	25	21	9
StLNC1145	1.29186	0.00836573	up	64	96	76	26	35	32
StLNC2450	1.29439	0.223486	no change	520	1254	440	129	926	48
StLNC1350	1.29597	0.621876	no change	0	6	8	0	7	0
StLNC2460	1.29753	0.73035	no change	0	0	26	0	14	0
StLNC1640	1.30442	0.00895363	up	97	104	86	43	64	19
StLNC0847	1.30812	0.253667	no change	27	54	25	10	2	22
StLNC1599	1.30861	0.282598	no change	8	14	8	0	7	5
StLNC1534	1.31656	0.501886	no change	6	0	12	3	6	0
StLNC2171	1.31804	0.729753	no change	9	0	0	0	6	0
StLNC1101	1.31943	0.385208	no change	34	4	2	5	2	9
StLNC2615	1.32165	0.579834	no change	1	2	26	11	0	0
StLNC0705	1.32376	0.515948	no change	8	18	13	0	0	11
StLNC0301	1.32683	0.0433496	up	91	132	101	22	47	52
StLNC1096	1.33158	0.512034	no change	5	12	15	0	0	9
StLNC0525	1.3332	0.384979	no change	3	1	7	2	3	0
StLNC1569	1.33525	0.621928	no change	0	3	11	0	7	0
StLNC1759	1.34103	0.002022	up	501	944	670	222	315	259
StLNC1591	1.34391	0.0725184	no change	11	11	15	4	7	4
StLNC1556	1.34738	0.0476035	up	14	17	14	5	8	5
StLNC0840	1.36608	0.29573	no change	22	48	42	16	35	0
StLNC1339	1.37168	0.0679627	no change	36	73	32	7	29	18
StLNC2266	1.38769	0.249449	no change	10	10	6	3	9	0
StLNC1061	1.39924	0.658645	no change	0	56	0	17	1	0
StLNC1637	1.40362	0.462331	no change	2	5	7	5	0	0
StLNC1494	1.41105	0.107434	no change	32	18	15	8	6	10
StLNC2216	1.4112	0.58653	no change	0	5	6	0	5	0
StLNC2027	1.41195	0.00504379	up	65	127	84	25	42	33
StLNC0202	1.41377	0.250567	no change	67	113	19	4	16	42
StLNC1084	1.41402	0.344389	no change	6	9	1	2	5	0
StLNC0481	1.41619	4.58e-06	up	555	928	695	245	352	214
StLNC0706	1.41874	0.70904	no change	0	16	0	5	0	0
StLNC0828	1.42956	0.472007	no change	14	29	16	0	29	0
StLNC0936	1.44814	0.235253	no change	19	37	29	13	23	0
StLNC0321	1.45305	0.40418	no change	1	23	11	1	14	0
StLNC1902	1.46377	0.00382854	up	244	383	272	79	117	113
StLNC0296	1.46822	0.0116256	up	71	181	174	59	78	22
StLNC2090	1.47306	0.465088	no change	17	35	17	0	33	0
StLNC2447	1.47344	0.585107	no change	0	10	2	0	5	0
StLNC1453	1.47695	0.694873	no change	0	0	28	0	0	7
StLNC1738	1.48038	0.0251045	up	217	391	281	67	87	130
StLNC1505	1.48543	0.0111705	up	25	29	29	12	14	5
StLNC0034	1.48614	0.214406	no change	5	10	7	2	7	0
StLNC0107	1.49594	0.189558	no change	13	5	5	1	5	3
StLNC1917	1.50369	0.110558	no change	10	22	14	1	9	6
StLNC2653	1.51617	0.261329	no change	6	5	6	0	6	1
StLNC0359	1.52773	0.553914	no change	0	6	6	0	5	0
StLNC1941	1.52882	0.57578	no change	10	18	0	0	13	0
StLNC0716	1.55301	0.0322266	up	14	18	19	3	10	5
StLNC0718	1.55619	0.215887	no change	26	15	19	7	19	0
StLNC0392	1.58672	0.155443	no change	5	10	7	3	5	0
StLNC2754	1.58885	0.454612	no change	27	36	0	0	12	9
StLNC2721	1.58995	0.486032	no change	21	1	25	0	23	0
StLNC1170	1.59473	0.0398666	up	135	236	146	37	146	17
StLNC2742	1.59932	0.0240054	up	13	28	20	6	6	7
StLNC1770	1.60571	0.201976	no change	4	6	5	0	3	2
StLNC0630	1.61443	0.0327446	up	17	32	19	3	14	6
StLNC0429	1.61719	0.289973	no change	55	1	123	13	56	5
StLNC0421	1.61969	0.229932	no change	30	27	14	0	12	11
StLNC2651	1.63268	0.000330214	up	292	430	354	90	128	115
StLNC2289	1.63334	0.434677	no change	13	30	28	0	0	16
StLNC0175	1.63569	0.390692	no change	2	10	5	5	0	0
StLNC0506	1.63867	0.417265	no change	21	29	7	0	25	0
StLNC2363	1.63914	0.410154	no change	0	19	31	8	9	0
StLNC2007	1.63931	0.343717	no change	96	160	127	105	0	10
StLNC0001	1.6398	0.412847	no change	14	1	1	0	1	4
StLNC0975	1.64696	0.229569	no change	7	3	13	2	7	0
StLNC1812	1.66387	0.0235981	up	28	39	41	10	7	14
StLNC1620	1.68033	0.0851514	no change	6	10	18	5	2	3
StLNC2620	1.68197	0.230004	no change	77	44	34	26	34	0
StLNC0071	1.68341	0.00325346	up	43	58	77	12	25	18
StLNC0293	1.69518	0.342728	no change	7	8	12	0	11	0
StLNC1080	1.70896	0.033436	up	300	300	531	92	290	31
StLNC2682	1.71487	0.407288	no change	1	4	124	25	17	0
StLNC2624	1.71727	0.652679	no change	11	0	0	0	0	3
StLNC2408	1.72607	0.412852	no change	18	4	34	0	24	0
StLNC1619	1.73509	0.0107255	up	21	28	24	7	6	8
StLNC1783	1.74903	0.0188605	up	34	76	34	11	31	5
StLNC0838	1.74911	0.307112	no change	1	9	2	0	1	2
StLNC0924	1.76665	0.0536086	no change	22	190	205	29	45	37
StLNC1622	1.77075	0.195928	no change	6	13	6	2	0	4
StLNC1204	1.77383	0.129183	no change	17	17	16	4	14	0
StLNC1516	1.78306	0.00120993	up	175	301	227	56	59	73
StLNC1342	1.78437	0.385676	no change	5	0	16	0	3	3
StLNC1142	1.79374	0.0017744	up	200	256	268	40	84	77
StLNC2294	1.79464	0.501504	no change	6	8	0	4	0	0
StLNC0238	1.8007	0.175765	no change	4	4	6	0	2	2
StLNC0103	1.82312	0.22199	no change	4	17	7	6	0	1
StLNC0031	1.82846	0.169704	no change	2	5	4	1	1	1
StLNC2193	1.82874	0.204616	no change	5	9	8	1	0	4
StLNC0002	1.83088	0.272898	no change	1	3	8	2	0	1
StLNC0026	1.8414	0.13738	no change	7	5	8	4	2	0
StLNC0198	1.84474	0.623797	no change	0	0	38	0	14	0
StLNC0066	1.85613	0.622485	no change	24	0	0	8	0	0
StLNC0010	1.87724	0.0768452	no change	8	12	11	5	4	0
StLNC1446	1.88822	0.513668	no change	14	40	0	0	0	10
StLNC0397	1.90287	0.141217	no change	5	21	12	0	4	5
StLNC1688	1.90926	0.181954	no change	4	4	8	3	0	1
StLNC1278	1.91822	0.0176686	up	11	24	18	5	3	5
StLNC2257	1.92035	0.0344106	up	148	197	208	34	17	71
StLNC1986	1.92662	0.0055726	up	18	25	25	7	10	2
StLNC2036	1.92867	0.103581	no change	10	8	14	0	6	3
StLNC2059	1.93375	0.349433	no change	14	0	60	1	1	13
StLNC2517	1.94451	0.40489	no change	0	66	2	4	15	0
StLNC0957	1.95952	1.38e-05	up	118	228	136	41	64	23
StLNC2732	1.96418	0.0526702	no change	5	18	12	2	2	4
StLNC0132	1.96673	0.125416	no change	5	10	7	3	0	2
StLNC1165	1.97393	0.470224	no change	9	12	0	0	0	4
StLNC2313	1.98476	0.26926	no change	6	13	6	6	0	0
StLNC2312	1.98541	0.289239	no change	6	11	4	0	0	4
StLNC0345	1.99237	0.0559558	no change	15	28	11	6	1	5
StLNC0063	1.99286	0.508937	no change	0	29	0	0	1	4
StLNC0254	1.99415	0.00927404	up	247	632	395	114	48	112
StLNC1018	2.00374	0.593492	no change	0	0	52	0	0	9
StLNC2252	2.00716	0.00981549	up	41	169	188	20	36	34
StLNC1141	2.03502	0.308399	no change	64	2	4	18	3	0
StLNC2002	2.03511	0.00927813	up	21	24	18	2	9	5
StLNC2525	2.04537	0.0806092	no change	7	29	12	1	11	1
StLNC1570	2.04781	0.000887126	up	71	163	69	32	24	15
StLNC1248	2.05828	0.268656	no change	11	20	8	9	0	0
StLNC0232	2.05879	0.4456	no change	4	7	0	0	0	2
StLNC0263	2.06173	0.323356	no change	27	23	0	0	6	6
StLNC0143	2.06321	0.256919	no change	5	8	9	0	0	4
StLNC0383	2.07773	0.129679	no change	52	64	62	0	20	20
StLNC2711	2.10739	0.18211	no change	1	23	14	0	7	2
StLNC1215	2.12549	0.0152308	up	127	78	124	26	61	5
StLNC0751	2.13203	0.0961137	no change	11	155	8	13	9	11
StLNC0394	2.13208	0.0598798	no change	19	24	30	5	15	0
StLNC0389	2.16263	0.419732	no change	0	20	6	5	0	0
StLNC1667	2.16584	0.130959	no change	3	18	6	3	0	2
StLNC2476	2.17844	0.19162	no change	213	452	226	0	61	105
StLNC2052	2.17967	0.22686	no change	6	18	10	7	0	0
StLNC1106	2.18441	0.0138075	up	9	24	46	4	8	5
StLNC0904	2.18885	0.310025	no change	16	2	3	0	0	4
StLNC0008	2.20045	0.288647	no change	0	38	5	5	4	0
StLNC1267	2.20204	0.564215	no change	0	20	0	0	5	0
StLNC1814	2.25104	0.000646679	up	84	90	69	16	36	6
StLNC1544	2.26014	0.265533	no change	0	16	38	3	10	0
StLNC2639	2.27986	0.0185073	up	58	77	52	21	21	1
StLNC2714	2.28137	0.0171042	up	10	15	8	1	4	2
StLNC1068	2.28644	0.241811	no change	13	22	0	4	4	0
StLNC0189	2.2902	0.371416	no change	6	9	0	0	4	0
StLNC0613	2.29623	0.0934787	no change	81	158	107	38	41	0
StLNC2757	2.31375	0.0602258	no change	38	81	54	20	18	0
StLNC1583	2.31445	0.106485	no change	2	8	5	0	2	1
StLNC2534	2.327	0.00191802	up	37	31	38	12	7	3
StLNC0108	2.34971	0.0408396	up	6	10	16	2	5	0
StLNC2135	2.35392	0.531166	no change	0	0	54	10	0	0
StLNC1034	2.36005	0.199662	no change	5	4	3	0	0	2
StLNC1172	2.3936	0.0917107	no change	7	16	16	0	1	5
StLNC1448	2.39494	0.277856	no change	21	16	0	0	1	5
StLNC0190	2.39528	0.236344	no change	52	51	52	0	41	0
StLNC1037	2.41771	0.520912	no change	0	0	46	0	0	6
StLNC0625	2.43063	0.194778	no change	18	43	30	0	22	0
StLNC2584	2.4377	0.110286	no change	26	7	26	1	14	0
StLNC2044	2.44746	0.0138007	up	71	133	50	4	12	24
StLNC2725	2.44804	0.0224066	up	12	11	20	3	6	0
StLNC0298	2.46947	0.255899	no change	37	49	0	6	0	7
StLNC0767	2.51068	0.396904	no change	0	88	54	0	0	16
StLNC0677	2.53138	0.108746	no change	7	35	113	0	16	10
StLNC2014	2.53254	0.224238	no change	38	126	46	0	47	0
StLNC1892	2.53702	0.276916	no change	0	63	4	1	12	0
StLNC2373	2.5528	0.333077	no change	0	25	23	0	10	0
StLNC0146	2.55419	0.173552	no change	2	12	10	0	0	3
StLNC0128	2.56118	0.0782765	no change	16	45	26	2	0	9
StLNC2416	2.56186	0.249974	no change	0	2	37	4	3	0
StLNC0543	2.56234	6.03e-06	up	120	149	184	17	29	28
StLNC0802	2.56612	0.178193	no change	14	29	3	0	10	0
StLNC1706	2.57002	0.0012283	up	17	18	34	3	6	3
StLNC2068	2.58265	0.0615715	no change	3	10	5	0	2	1
StLNC0689	2.59491	0.00743176	up	13	12	10	3	2	1
StLNC0284	2.67454	0.13085	no change	2	10	1	1	1	0
StLNC0292	2.67885	0.114354	no change	4	5	4	2	0	0
StLNC1860	2.74542	0.00315341	up	27	264	281	30	32	18
StLNC1817	2.7611	0.296165	no change	0	15	5	0	0	2
StLNC2655	2.78366	0.0905088	no change	8	25	12	0	8	0
StLNC1998	2.80289	1.25e-05	up	213	375	260	26	35	49
StLNC2835	2.80699	0.295506	no change	11	0	23	5	0	0
StLNC2734	2.83645	0.267211	no change	11	16	0	0	5	0
StLNC2037	2.86842	0.138004	no change	46	20	1	0	1	7
StLNC0416	2.87524	9.95e-05	up	101	268	86	10	35	17
StLNC1441	2.88023	0.0493193	up	32	73	57	0	3	14
StLNC2362	2.89198	0.0139578	up	12	10	10	1	4	0
StLNC1019	2.8929	0.147622	no change	6	48	5	7	0	0
StLNC0070	2.9332	0.253871	no change	7	5	0	0	2	0
StLNC2782	2.94278	0.046009	up	14	1	41	1	5	2
StLNC2776	2.94309	0.0296602	up	9	10	5	0	1	2
StLNC1901	2.98487	0.0343183	up	63	231	73	11	44	0
StLNC1451	3.02519	0.427179	no change	0	0	19	0	3	0
StLNC1257	3.03174	0.0308409	up	136	214	149	53	1	4
StLNC2277	3.04095	0.0848142	no change	9	1	4	1	1	0
StLNC0792	3.04924	0.0335276	up	4	6	6	1	1	0
StLNC1971	3.12801	0.158266	no change	57	12	3	0	0	7
StLNC0923	3.12951	0.188819	no change	1	22	0	1	0	1
StLNC2392	3.13153	0.205125	no change	0	840	663	1	210	1
StLNC2646	3.13741	0.132128	no change	0	28	71	3	10	0
StLNC2358	3.14696	0.000167485	up	35	108	138	11	6	11
StLNC1881	3.22977	4.62e-06	up	43	181	118	13	17	6
StLNC0068	3.24274	0.397635	no change	0	0	16	0	2	0
StLNC1367	3.26563	9.77e-05	up	31	117	61	4	16	3
StLNC1409	3.2738	0.0669241	no change	3	16	6	0	0	2
StLNC2622	3.27476	0.169716	no change	14	0	1	1	1	0
StLNC2706	3.2811	0.0399276	up	21	31	16	0	9	0
StLNC1168	3.29033	0.00330361	up	147	452	26	10	42	14
StLNC2237	3.30195	0.113983	no change	15	19	104	0	0	10
StLNC1194	3.32669	0.00177695	up	16	20	30	0	5	2
StLNC1073	3.33872	0.0190091	up	42	143	41	6	0	11
StLNC1489	3.37072	0.018103	up	5	7	10	1	0	1
StLNC0287	3.3728	0.195574	no change	3	16	0	0	2	0
StLNC0048	3.39711	0.0944964	no change	16	1	1	0	1	1
StLNC0881	3.40144	0.106426	no change	1	60	28	0	10	0
StLNC0593	3.40322	0.0063776	up	9	24	8	0	3	1
StLNC2397	3.41273	0.00656323	up	10	10	13	0	1	2
StLNC0591	3.45318	0.00302866	up	49	198	38	17	2	4
StLNC1128	3.47097	0.0363694	up	142	216	99	0	3	28
StLNC1155	3.54685	0.0413492	up	3	6	4	0	0	1
StLNC0917	3.55677	1.3e-10	up	111	285	211	12	28	12
StLNC1366	3.57462	0.0548531	no change	15	68	37	0	0	7
StLNC2678	3.67045	0.00640971	up	14	31	6	3	1	0
StLNC2385	3.67829	0.0409122	up	16	23	0	1	1	1
StLNC0954	3.7136	0.177899	no change	34	56	0	0	0	5
StLNC2118	3.73296	0.0304721	up	3	8	4	0	1	0
StLNC1480	3.73426	0.00607748	up	13	16	16	0	4	0
StLNC2091	3.77928	1.16e-10	up	391	722	423	23	41	41
StLNC0860	3.78667	4.05e-11	up	71	142	137	7	14	5
StLNC0849	3.8028	0.0738591	no change	3	1	30	0	3	0
StLNC2766	3.81689	0.011394	up	3	51	89	4	7	0
StLNC1543	3.85772	0.0195456	up	21	15	6	3	0	0
StLNC1606	3.89038	0.126817	no change	14	0	8	0	2	0
StLNC2004	3.91555	0.000507362	up	102	183	11	5	10	5
StLNC1133	3.92786	0.0588422	no change	21	0	18	2	1	0
StLNC1565	3.96666	0.118508	no change	9	7	0	0	1	0
StLNC2751	3.96906	0.00989788	up	8	15	26	3	0	0
StLNC1030	3.97072	1.73e-09	up	68	138	142	4	14	5
StLNC1217	3.98653	0.00178876	up	12	7	28	1	1	1
StLNC0332	3.99047	0.122971	no change	161	861	4	0	81	0
StLNC1575	4.0754	0.000115704	up	23	250	96	3	15	4
StLNC0216	4.10133	0.00475906	up	10	12	9	0	2	0
StLNC1660	4.10204	0.00417622	up	11	25	18	3	0	0
StLNC1427	4.11465	0.276953	no change	23	0	0	0	2	0
StLNC1200	4.15101	0.276438	no change	0	0	20	0	0	1
StLNC1260	4.17297	0.269197	no change	0	23	0	0	1	0
StLNC2317	4.21879	0.00610743	up	16	10	10	2	0	0
StLNC0181	4.22822	0.00335253	up	23	27	26	4	0	0
StLNC1714	4.26471	0.000129204	up	15	22	34	1	3	0
StLNC1951	4.33557	0.0126035	up	204	443	340	0	63	1
StLNC1705	4.41615	0.000691964	up	5	25	38	1	1	1
StLNC2310	4.45892	0.0035497	up	6	53	7	1	2	0
StLNC0922	4.46238	0.00050596	up	11	18	14	1	1	0
StLNC0341	4.4929	0.0773497	no change	0	23	5	1	0	0
StLNC2054	4.51129	1.75e-07	up	41	57	42	1	2	3
StLNC2472	4.58257	0.0482584	up	8	2	2	0	0	0
StLNC1577	4.59972	0.24144	no change	0	0	14	0	0	0
StLNC1695	4.61437	0.11041	no change	0	2	76	3	0	0
StLNC2371	4.61561	0.0283091	up	4	8	2	0	0	0
StLNC2657	4.63496	0.170791	no change	5	0	8	0	0	0
StLNC2346	4.68134	4.39e-14	up	262	989	638	25	35	13
StLNC1471	4.69488	0.168432	no change	9	4	0	0	0	0
StLNC2834	4.69524	7.85e-06	up	482	893	1183	14	10	54
StLNC1709	4.69915	0.23126	no change	0	0	15	0	0	0
StLNC2698	4.69915	0.23126	no change	0	0	15	0	0	0
StLNC0544	4.69915	0.23126	no change	0	0	15	0	0	0
StLNC0274	4.70619	0.151726	no change	0	8	8	0	0	0
StLNC0004	4.71398	0.163807	no change	8	0	5	0	0	0
StLNC0510	4.71729	0.151309	no change	0	7	9	0	0	0
StLNC1229	4.72515	0.1933	no change	1	0	14	0	0	0
StLNC1934	4.73918	0.153566	no change	0	5	11	0	0	0
StLNC2635	4.74999	0.156618	no change	0	4	12	0	0	0
StLNC2084	4.76228	0.0184943	up	2	8	6	0	0	0
StLNC2267	4.76689	0.146261	no change	0	11	6	0	0	0
StLNC0460	4.77778	0.155454	no change	9	5	0	0	0	0
StLNC0885	4.78115	0.223099	no change	0	18	0	0	0	0
StLNC2003	4.81454	0.187587	no change	12	0	1	0	0	0
StLNC1861	4.81454	0.187587	no change	12	0	1	0	0	0
StLNC0711	4.85711	0.00988179	up	5	5	6	0	0	0
StLNC0526	4.85892	0.215555	no change	0	19	0	0	0	0
StLNC1302	4.85892	0.215555	no change	0	19	0	0	0	0
StLNC1116	4.86424	0.19066	no change	0	56	0	0	2	0
StLNC0167	4.87507	0.0146586	up	4	10	3	0	0	0
StLNC1219	4.87928	1.98e-06	up	111	148	222	6	13	0
StLNC1765	4.9327	0.20857	no change	0	20	0	0	0	0
StLNC0830	4.93944	0.131817	no change	7	10	0	0	0	0
StLNC1691	4.95276	0.168506	no change	0	1	17	0	0	0
StLNC1225	4.96194	0.205849	no change	0	0	18	0	0	0
StLNC1483	4.97929	0.128521	no change	6	12	0	0	0	0
StLNC2364	5.0029	0.202081	no change	0	21	0	0	0	0
StLNC1893	5.00896	0.0100218	up	3	11	5	0	0	0
StLNC1233	5.01702	6.89e-11	up	87	187	210	3	11	2
StLNC1874	5.02743	0.116965	no change	0	10	10	0	0	0
StLNC2579	5.06964	0.0436357	up	14	0	20	1	0	0
StLNC1646	5.06983	0.196032	no change	0	22	0	0	0	0
StLNC0726	5.06983	0.196032	no change	0	22	0	0	0	0
StLNC0577	5.10556	0.153685	no change	0	1	19	0	0	0
StLNC0172	5.12154	2.31e-10	up	45	114	90	2	3	2
StLNC1895	5.15732	4.33e-05	up	21	30	18	1	1	0
StLNC1761	5.17173	0.124666	no change	3	0	17	0	0	0
StLNC2703	5.17658	0.0121622	up	2	6	13	0	0	0
StLNC2674	5.19506	0.185079	no change	0	24	0	0	0	0
StLNC1449	5.22782	0.18229	no change	17	0	0	0	0	0
StLNC0182	5.22782	0.18229	no change	17	0	0	0	0	0
StLNC2023	5.23547	0.00121288	up	4	20	55	0	1	1
StLNC1649	5.23556	0.00544138	up	9	5	6	0	0	0
StLNC1932	5.27816	0.112796	no change	0	22	3	0	0	0
StLNC0772	5.28013	5.88e-05	up	25	19	35	1	0	1
StLNC0524	5.28538	0.00163207	up	7	9	27	0	0	1
StLNC0445	5.31052	0.175391	no change	18	0	0	0	0	0
StLNC2239	5.31531	0.174997	no change	0	0	23	0	0	0
StLNC0243	5.33083	0.00336147	up	6	12	5	0	0	0
StLNC2233	5.33444	0.0956225	no change	10	12	0	0	0	0
StLNC2618	5.3682	0.00385796	up	8	11	4	0	0	0
StLNC0815	5.38094	0.00304186	up	63	14	3	1	0	1
StLNC2541	5.38874	0.169048	no change	19	0	0	0	0	0
StLNC2568	5.39856	0.00196525	up	6	11	7	0	0	0
StLNC2226	5.40841	6.16e-22	up	323	671	802	14	21	8
StLNC0853	5.41287	0.00137298	up	5	13	30	0	1	0
StLNC1388	5.41696	0.166803	no change	0	28	0	0	0	0
StLNC2596	5.42419	0.00287669	up	10	7	6	0	0	0
StLNC2507	5.43385	0.0888418	no change	12	11	0	0	0	0
StLNC0502	5.43995	0.0604357	no change	1	54	0	0	0	1
StLNC1900	5.44684	1.76e-05	up	20	118	46	3	1	0
StLNC2648	5.45252	0.0914104	no change	0	23	5	0	0	0
StLNC2132	5.46294	0.163194	no change	20	0	0	0	0	0
StLNC0770	5.46294	0.163194	no change	20	0	0	0	0	0
StLNC1500	5.47385	0.00037419	up	40	37	85	0	0	3
StLNC2287	5.47615	0.0810759	no change	0	11	16	0	0	0
StLNC0144	5.50224	0.0848767	no change	0	7	20	0	0	0
StLNC0893	5.51348	0.00991178	up	6	2	17	0	0	0
StLNC1837	5.52476	0.00134375	up	6	9	11	0	0	0
StLNC0498	5.54649	0.156787	no change	0	0	27	0	0	0
StLNC2088	5.55404	0.0399809	up	19	117	0	0	0	2
StLNC2465	5.59119	0.00175282	up	11	9	6	0	0	0
StLNC1052	5.59432	0.00128314	up	5	13	10	0	0	0
StLNC1333	5.60923	0.152104	no change	0	32	0	0	0	0
StLNC2379	5.6233	0.0708696	no change	0	13	17	0	0	0
StLNC1185	5.65266	0.0247064	up	1	2	26	0	0	0
StLNC1612	5.65807	1.42e-06	up	126	1186	1606	14	48	3
StLNC0203	5.66506	0.148028	no change	23	0	0	0	0	0
StLNC1609	5.6891	0.000300975	up	12	17	85	1	0	1
StLNC0835	5.69654	0.145767	no change	0	34	0	0	0	0
StLNC2057	5.69841	0.145634	no change	0	0	30	0	0	0
StLNC2034	5.69841	0.145634	no change	0	0	30	0	0	0
StLNC0380	5.7125	0.0671731	no change	0	23	10	0	0	0
StLNC2156	5.72177	0.000673289	up	10	10	9	0	0	0
StLNC0473	5.7303	1.08e-08	up	36	229	168	3	4	1
StLNC2058	5.73829	0.14281	no change	0	35	0	0	0	0
StLNC2067	5.74077	0.0444953	up	0	310	16	0	7	0
StLNC2389	5.7448	0.00181503	up	4	10	17	0	0	0
StLNC1790	5.76498	0.0751435	no change	0	5	27	0	0	0
StLNC1595	5.78561	0.139514	no change	25	0	0	0	0	0
StLNC1104	5.78629	0.0606938	no change	0	18	16	0	0	0
StLNC0438	5.8099	0.0601676	no change	0	22	13	0	0	0
StLNC2496	5.85128	0.00132694	up	5	9	19	0	0	0
StLNC1150	5.85443	0.00108392	up	14	11	6	0	0	0
StLNC1094	5.85675	0.134672	no change	0	38	0	0	0	0
StLNC0684	5.86059	4.1e-05	up	17	28	19	0	1	0
StLNC2423	5.87889	0.133191	no change	0	0	34	0	0	0
StLNC2761	5.89717	0.000375394	up	7	13	14	0	0	0
StLNC0044	5.89951	0.0634946	no change	7	29	0	0	0	0
StLNC1842	5.90237	1.71e-06	up	365	376	559	1	26	1
StLNC1280	5.92065	0.00481505	up	12	2	18	0	0	0
StLNC1990	5.92069	0.130431	no change	0	0	35	0	0	0
StLNC2520	5.9236	1.4e-06	up	81	504	359	1	2	9
StLNC1878	5.9328	0.0956755	no change	27	1	0	0	0	0
StLNC2728	5.93953	0.00364657	up	18	3	10	0	0	0
StLNC0191	5.96385	0.0191418	up	1	2	33	0	0	0
StLNC2853	5.99637	0.088928	no change	0	1	36	0	0	0
StLNC0587	6.00093	0.125259	no change	0	42	0	0	0	0
StLNC1045	6.03483	0.123123	no change	0	43	0	0	0	0
StLNC2349	6.03929	0.122844	no change	0	0	38	0	0	0
StLNC2731	6.06771	0.0269769	up	0	4	72	1	0	0
StLNC2792	6.09653	0.119308	no change	31	0	0	0	0	0
StLNC1735	6.132	0.117158	no change	0	46	0	0	0	0
StLNC2410	6.14084	0.0242048	up	5	0	73	0	1	0
StLNC1855	6.14887	0.116146	no change	0	0	41	0	0	0
StLNC2113	6.15909	0.000128943	up	9	19	13	0	0	0
StLNC2578	6.16547	2.76e-05	up	23	85	64	0	0	2
StLNC2563	6.17096	0.00610748	up	74	225	1	0	0	3
StLNC1213	6.18582	1.21e-05	up	36	90	43	0	0	2
StLNC1686	6.19332	0.113513	no change	0	48	0	0	0	0
StLNC0725	6.19712	0.0471366	up	16	0	22	0	0	0
StLNC2309	6.25071	0.110183	no change	0	0	44	0	0	0
StLNC0052	6.30865	0.00427184	up	1	30	18	0	0	0
StLNC2566	6.33577	5.94e-05	up	10	18	18	0	0	0
StLNC1011	6.35218	0.104487	no change	37	0	0	0	0	0
StLNC2365	6.42823	0.100374	no change	39	0	0	0	0	0
StLNC0402	6.44005	1.86e-12	up	138	308	193	2	6	0
StLNC1614	6.48276	8.83e-05	up	14	27	10	0	0	0
StLNC1268	6.49875	3.23e-06	up	97	266	97	0	6	0
StLNC1875	6.50819	0.000463296	up	4	22	28	0	0	0
StLNC1286	6.5376	0.0354537	up	17	0	32	0	0	0
StLNC2283	6.5594	0.000690571	up	3	29	25	0	0	0
StLNC1850	6.56424	0.0347093	up	17	0	33	0	0	0
StLNC0125	6.56909	0.000238771	up	14	34	7	0	0	0
StLNC0794	6.60572	0.0299655	up	0	23	36	0	0	0
StLNC1539	6.64913	0.0891585	no change	0	0	58	0	0	0
StLNC0285	6.68534	5.98e-05	up	8	24	28	0	0	0
StLNC0958	6.68604	0.0299036	up	28	27	0	0	0	0
StLNC0961	6.68619	0.00846536	up	3	62	1	0	0	0
StLNC1436	6.72186	0.0856958	no change	0	0	61	0	0	0
StLNC1748	6.72815	0.0854018	no change	48	0	0	0	0	0
StLNC2830	6.74177	0.0280949	up	25	34	0	0	0	0
StLNC0376	6.75797	1.39e-05	up	12	24	26	0	0	0
StLNC2440	6.76267	1.55e-05	up	12	31	20	0	0	0
StLNC0882	6.78753	6.47e-07	up	127	294	222	0	7	0
StLNC0115	6.80111	0.0247165	up	0	30	38	0	0	0
StLNC2248	6.80916	1.92e-06	up	89	94	38	2	0	0
StLNC1635	6.8157	0.0813908	no change	51	0	0	0	0	0
StLNC2545	6.84922	0.0281932	up	0	62	12	0	0	0
StLNC2106	6.85069	5.84e-06	up	16	23	26	0	0	0
StLNC0406	6.87685	0.0237976	up	0	26	45	0	0	0
StLNC2726	6.88865	0.0266303	up	15	56	0	0	0	0
StLNC2314	6.91264	7.3e-07	up	61	322	60	1	0	2
StLNC1802	6.93594	0.00280928	up	2	7	62	0	0	0
StLNC0186	6.94345	0.000104315	up	19	9	39	0	0	0
StLNC1925	7.03839	5.67e-12	up	157	391	282	1	6	0
StLNC1341	7.04678	9.59e-05	up	20	9	43	0	0	0
StLNC1717	7.10473	2.22e-05	up	10	28	42	0	0	0
StLNC1032	7.29902	0.00134286	up	16	177	1	0	0	1
StLNC1547	7.49123	3.11e-07	up	23	46	34	0	0	0
StLNC0217	7.57188	1.75e-07	up	30	36	40	0	0	0
StLNC1163	7.77773	1.17e-08	up	52	105	88	1	0	0
StLNC1745	7.78172	0.00114482	up	30	1	88	0	0	0
StLNC1189	7.85551	0.000839964	up	62	61	1	0	0	0
StLNC1475	7.86021	0.0106606	up	50	80	0	0	0	0
StLNC2162	7.86023	0.000721396	up	1	101	44	0	0	0
StLNC1134	7.89318	0.00010516	up	3	70	202	0	1	0
StLNC2359	7.91062	8.05e-05	up	11	17	110	0	0	0
StLNC1567	7.96178	6.46e-05	up	6	39	102	0	0	0
StLNC1740	8.03681	1.25e-08	up	39	59	50	0	0	0
StLNC0632	8.12533	1.45e-07	up	161	425	87	0	0	2
StLNC1370	8.33135	0.000191623	up	109	50	3	0	0	0
StLNC1487	8.34807	4.48e-09	up	48	84	53	0	0	0
StLNC0273	8.41496	2.44e-07	up	88	58	34	0	0	0
StLNC0801	8.58416	1.48e-06	up	51	154	21	0	0	0
StLNC2419	8.60387	1.7e-09	up	330	172	159	0	2	0
StLNC0497	8.64898	6.09e-09	up	83	633	129	1	1	0
StLNC0963	8.72981	6.31e-06	up	87	140	11	0	0	0
StLNC2275	8.90058	1.83e-08	up	105	84	330	1	0	0
StLNC1653	8.95513	9.32e-10	up	64	83	132	0	0	0
StLNC2209	9.09136	7.31e-06	up	80	568	12	0	0	1
StLNC1711	9.10671	2.94e-09	up	581	678	114	0	3	0
StLNC1143	9.33375	0.00300135	up	0	134	255	0	0	0
StLNC2086	9.3418	6.92e-09	up	44	229	117	0	0	0
StLNC0721	9.3513	1.1e-07	up	178	44	469	0	1	0
StLNC0875	9.36129	0.00308087	up	137	233	0	0	0	0
StLNC2352	9.41594	1.81e-08	up	50	278	86	0	0	0
StLNC1463	9.48593	1.99e-12	up	176	290	327	1	0	0
StLNC2412	9.61764	3.93e-05	up	2	297	190	0	0	0
StLNC0919	9.68264	0.000144144	up	25	1	892	0	1	0
StLNC1269	9.97875	0.00201003	up	0	140	460	0	0	0
StLNC1162	10.2366	1.04e-12	up	894	1329	2187	0	0	3
StLNC0692	10.2607	8.71e-13	up	128	340	246	0	0	0
StLNC0192	10.2692	1.3e-11	up	179	397	135	0	0	0
StLNC2817	10.3504	2.22e-18	up	578	1053	1075	1	0	1
StLNC1349	10.3608	1.58e-13	up	271	492	701	1	0	0
StLNC0615	10.4851	7.61e-15	up	341	748	519	0	1	0
StLNC0624	10.5231	1.52e-11	up	728	578	218	0	0	1
StLNC0940	10.6898	1.84e-20	up	951	1768	1863	0	3	0
StLNC0583	11.0609	5.4e-08	up	357	847	33	0	0	0
StLNC1496	11.1636	2.54e-44	up	3450	8821	6569	1	4	3
StLNC2234	11.43	4.81e-18	up	821	1100	1089	0	0	1
StLNC1394	11.6032	4.34e-17	up	392	818	577	0	0	0
StLNC2454	11.6227	8.61e-15	up	655	386	646	0	0	0
StLNC1517	11.6956	2.65e-13	up	315	438	1129	0	0	0
StLNC0065	11.7501	5.03e-07	up	975	835	10	0	0	0
StLNC2008	12.2597	1.87e-19	up	815	1095	829	0	0	0
StLNC2663	12.5219	1.41e-13	up	280	2168	1133	0	0	0
StLNC0049	13.0394	2.02e-20	up	920	2261	1700	0	0	0
StLNC0942	14.3178	1.54e-22	up	3345	5862	2369	0	0	0

## Sheet: ht4_vs_ht0
LncRNA	log2FC	pvalue	regulations	ht4_1	ht4_2	ht4_3	ht0_1	ht0_2	ht0_3
StLNC0001	2.61438	0.0487066	up	8	10	21	0	1	4
StLNC0002	3.13721	0.0246751	up	3	10	20	2	0	1
StLNC0003	1.07669	0.00343264	up	744	560	1179	360	480	277
StLNC0004	6.65445	0.0310938	up	0	30	36	0	0	0
StLNC0005	1.27399	0.00723976	up	36	61	66	21	31	14
StLNC0006	1.08292	0.0332531	up	127	130	190	55	65	71
StLNC0007	5.19638	0.00694623	up	5	3	16	0	0	0
StLNC0008	2.81728	0.0224573	up	5	21	44	5	4	0
StLNC0009	5.95492	0.000195375	up	10	12	14	0	0	0
StLNC0010	2.57073	0.0114409	up	10	20	24	5	4	0
StLNC0011	1.63194	0.00146773	up	275	362	435	79	225	61
StLNC0012	-0.467261	0.453342	no change	16	36	44	35	81	19
StLNC0014	-1.68538	0.0519888	no change	11	15	7	39	73	11
StLNC0016	0.126821	0.951725	no change	9	4	0	0	8	6
StLNC0018	1.99267	0.0768628	no change	91	151	66	40	4	26
StLNC0019	0.138138	0.970743	no change	0	0	21	0	18	0
StLNC0020	-0.112405	0.820454	no change	40	55	82	60	54	56
StLNC0024	-4.81378	0.0252382	down	0	0	0	6	10	1
StLNC0025	-0.896118	0.335324	no change	7	3	6	5	11	12
StLNC0026	2.74727	0.0235154	up	5	19	18	4	2	0
StLNC0027	-2.69814	0.0111121	down	17	320	166	765	1422	900
StLNC0028	5.25568	0.00311486	up	8	5	9	0	0	0
StLNC0029	0.475476	0.468361	no change	36	21	63	16	34	28
StLNC0030	-0.509042	0.519802	no change	6	11	31	24	32	7
StLNC0033	-1.229	0.368555	no change	0	9	12	16	29	3
StLNC0034	2.6105	0.0157395	up	9	18	25	2	7	0
StLNC0037	-2.61959	0.446022	no change	0	84	0	0	676	41
StLNC0038	1.35107	0.522073	no change	18	18	0	5	15	0
StLNC0040	-0.417972	0.793345	no change	13	10	30	20	0	31
StLNC0042	-0.125839	0.739815	no change	51	61	107	82	100	45
StLNC0044	5.55812	0.077774	no change	0	10	23	0	0	0
StLNC0049	12.5645	7.62e-16	up	1237	1242	767	0	0	0
StLNC0050	-5.83789	0.0118563	down	0	0	0	24	2	3
StLNC0051	0.713446	0.425463	no change	3	7	9	4	5	2
StLNC0052	5.43269	0.0438734	up	18	1	1	0	0	0
StLNC0053	1.32208	0.0515456	no change	27	27	29	10	9	12
StLNC0055	0.891889	0.213415	no change	31	85	218	41	61	46
StLNC0056	1.15625	0.618755	no change	0	36	182	38	46	0
StLNC0057	5.32792	0.107425	no change	7	13	0	0	0	0
StLNC0058	-1.96903	0.374295	no change	0	0	69	99	49	34
StLNC0061	-0.575424	0.375557	no change	49	51	40	95	96	31
StLNC0062	-1.14083	6.1e-05	down	79	94	152	218	299	162
StLNC0064	0.219095	0.66001	no change	23	30	43	21	30	25
StLNC0067	0.097636	0.926142	no change	8	2	11	2	11	6
StLNC0069	-7.10073	0.0694049	no change	0	0	0	0	0	53
StLNC0071	2.39495	1.41e-05	up	81	68	169	12	25	18
StLNC0073	0.134292	0.917858	no change	7	7	6	6	16	0
StLNC0078	0.188416	0.899214	no change	30	39	47	60	48	0
StLNC0079	0.214097	0.839416	no change	25	46	163	44	149	8
StLNC0080	1.86826	0.0515597	no change	7	7	30	2	4	4
StLNC0081	1.43652	0.0845179	no change	8	14	13	3	4	5
StLNC0082	-0.0932412	0.957914	no change	52	109	24	0	139	79
StLNC0083	0.27454	0.821851	no change	4	1	11	3	9	1
StLNC0084	-0.944411	0.314358	no change	81	20	51	38	155	109
StLNC0086	-3.43102	0.166726	no change	0	0	3	0	16	9
StLNC0090	-0.480593	0.578446	no change	5	5	8	6	6	10
StLNC0091	-0.757683	0.204738	no change	11	24	36	46	49	18
StLNC0092	6.714	0.00876856	up	45	0	85	1	0	0
StLNC0093	1.45105	0.260403	no change	5	4	4	3	2	0
StLNC0094	-2.85239	0.000904286	down	174	209	473	1571	4666	359
StLNC0096	-1.37777	0.472704	no change	0	3	2	0	7	5
StLNC0097	-5.17073	0.146424	no change	0	0	0	1	25	0
StLNC0099	4.76633	0.013788	up	5	6	4	0	0	0
StLNC0100	-0.0484574	0.941852	no change	7	24	27	17	28	12
StLNC0101	-0.831132	0.158917	no change	11	22	16	26	43	19
StLNC0103	1.63105	0.350768	no change	13	1	9	6	0	1
StLNC0104	-1.43421	0.481024	no change	3	2	0	0	8	7
StLNC0105	-3.54409	0.0290169	down	4	0	0	18	26	12
StLNC0106	-5.47944	0.00151315	down	0	0	0	10	9	5
StLNC0107	1.4837	0.34926	no change	12	0	14	1	5	3
StLNC0108	2.84423	0.00424357	up	12	13	24	2	5	0
StLNC0109	-0.288577	0.885025	no change	0	3	9	6	0	4
StLNC0110	0.210199	0.732193	no change	36	70	43	31	69	33
StLNC0111	0.400321	0.81314	no change	9	23	3	4	33	0
StLNC0114	-0.380493	0.601802	no change	6	5	15	7	15	9
StLNC0116	-0.593778	0.173469	no change	21	28	37	45	51	28
StLNC0119	-0.590118	0.693195	no change	8	14	12	0	23	24
StLNC0122	0.850278	0.651806	no change	0	5	9	0	5	2
StLNC0123	3.41679	0.0680565	no change	5	4	2	0	0	1
StLNC0124	-0.668941	0.123071	no change	44	56	85	105	137	47
StLNC0126	-2.1509	0.314594	no change	0	5	1	5	29	0
StLNC0127	0.247217	0.580617	no change	143	177	221	190	157	90
StLNC0128	0.11905	0.961097	no change	12	0	1	2	0	9
StLNC0129	-0.0031334	0.994675	no change	188	221	309	262	369	102
StLNC0130	-0.117351	0.921922	no change	6	8	4	14	2	3
StLNC0132	1.45977	0.465735	no change	6	0	12	3	0	2
StLNC0133	-8.70205	0.000408159	down	1	0	0	16	576	1
StLNC0134	-2.03374	0.234869	no change	0	0	6	5	5	7
StLNC0137	0.761046	0.759217	no change	0	74	3	12	48	0
StLNC0138	0.286825	0.721126	no change	26	42	169	41	48	59
StLNC0141	-0.630102	0.693335	no change	7	4	5	6	0	14
StLNC0142	0.280303	0.868203	no change	11	43	143	86	55	0
StLNC0143	2.11617	0.24112	no change	5	6	14	0	0	4
StLNC0144	5.96952	0.000357262	up	6	11	23	0	0	0
StLNC0147	-5.28413	0.177679	no change	0	0	0	20	0	0
StLNC0148	-0.634918	0.20957	no change	55	67	101	140	154	48
StLNC0149	0.012257	0.98479	no change	14	8	24	15	16	11
StLNC0151	0.1754	0.800396	no change	816	717	395	460	978	455
StLNC0152	-6.96205	0.0750531	no change	0	0	0	64	0	0
StLNC0153	-0.674439	0.730701	no change	0	5	3	0	5	6
StLNC0154	-1.01248	0.105341	no change	16	35	21	48	53	40
StLNC0155	-0.687304	0.854473	no change	0	0	30	0	0	24
StLNC0156	4.8312	0.15353	no change	6	8	0	0	0	0
StLNC0157	5.24762	0.180591	no change	17	0	0	0	0	0
StLNC0160	-0.453825	0.580255	no change	4	26	26	17	35	19
StLNC0161	0.742541	0.363448	no change	25	49	31	30	11	17
StLNC0162	-5.16806	0.00359202	down	0	0	0	7	7	5
StLNC0165	-2.07503	0.0411615	down	197	106	451	611	2719	151
StLNC0167	5.6087	0.00444423	up	2	13	16	0	0	0
StLNC0168	-2.16364	0.0031287	down	13	14	28	100	127	21
StLNC0169	-0.542797	0.849305	no change	0	11	0	0	10	7
StLNC0170	-5.35451	0.171904	no change	0	0	0	21	0	0
StLNC0172	3.83239	0.0486457	up	4	0	138	2	3	2
StLNC0173	-4.58518	0.213454	no change	0	0	0	11	0	1
StLNC0174	-3.05532	0.229897	no change	0	0	4	5	26	0
StLNC0175	2.35379	0.179452	no change	11	7	8	5	0	0
StLNC0176	4.7681	0.151392	no change	0	4	16	0	0	0
StLNC0177	0.326839	0.556222	no change	49	95	86	65	53	51
StLNC0179	0.587426	0.201749	no change	39	41	89	34	38	29
StLNC0181	2.30195	0.39585	no change	8	10	0	4	0	0
StLNC0185	-0.799137	0.418186	no change	25	5	18	12	35	34
StLNC0186	8.86667	1.42e-10	up	65	78	142	0	0	0
StLNC0187	1.12038	0.140156	no change	21	13	15	8	12	4
StLNC0188	-0.778858	0.0837092	no change	19	26	44	40	59	41
StLNC0189	1.6983	0.511247	no change	3	0	9	0	4	0
StLNC0190	4.05285	0.0465725	up	107	120	346	0	41	0
StLNC0191	6.58514	0.017783	up	1	49	1	0	0	0
StLNC0192	6.80703	0.0278002	up	0	23	56	0	0	0
StLNC0193	-2.19024	0.241276	no change	0	0	13	8	35	6
StLNC0194	-3.20966	0.000141329	down	70	71	173	761	2157	180
StLNC0195	-1.48413	0.0223451	down	6	5	14	17	36	14
StLNC0196	-6.3236	0.10611	no change	0	0	0	0	59	0
StLNC0197	-0.505179	0.603261	no change	3	4	5	4	4	7
StLNC0198	2.35308	0.414297	no change	0	5	69	0	14	0
StLNC0200	-4.98096	0.15084	no change	0	0	0	3	0	10
StLNC0201	0.664584	0.524047	no change	11	12	4	10	5	3
StLNC0202	-1.08419	0.349688	no change	13	9	13	4	16	42
StLNC0204	-5.96213	0.1278	no change	0	0	0	32	0	0
StLNC0205	-0.720148	0.378244	no change	66	90	99	197	225	26
StLNC0206	1.07779	0.716601	no change	28	0	34	0	38	0
StLNC0207	-0.411931	0.614359	no change	28	50	159	34	157	82
StLNC0211	-0.270553	0.723472	no change	8	7	16	7	25	6
StLNC0212	-1.26419	0.0633529	no change	23	37	42	34	108	86
StLNC0213	0.21016	0.725855	no change	19	26	24	21	32	9
StLNC0214	-0.657307	0.612855	no change	6	36	8	4	78	14
StLNC0215	-1.49537	0.252809	no change	2	0	6	8	4	6
StLNC0217	7.17037	0.0291927	up	0	7	107	0	0	0
StLNC0220	-2.37195	0.199077	no change	27	0	1	24	134	40
StLNC0221	0.874449	0.389711	no change	60	63	16	27	60	8
StLNC0222	-11.7707	0.000590668	down	0	0	0	572	1757	0
StLNC0224	0.468089	0.828638	no change	2	10	2	0	14	0
StLNC0227	-1.43999	0.70719	no change	0	0	5	0	13	0
StLNC0229	0.124418	0.833183	no change	20	15	24	17	18	16
StLNC0230	-7.2066	0.00014263	down	0	0	0	39	45	4
StLNC0231	0.0705479	0.942188	no change	3	3	5	4	4	2
StLNC0233	-1.04952	0.665162	no change	12	0	0	1	5	19
StLNC0238	4.01385	0.00234995	up	33	8	23	0	2	2
StLNC0239	-3.32601	0.0934485	no change	1	2	0	1	41	1
StLNC0241	-0.903906	0.0289772	no change	49	60	107	144	175	68
StLNC0245	-1.05839	0.42209	no change	10	0	21	23	18	14
StLNC0247	3.72251	0.0196847	up	6	14	12	0	0	2
StLNC0249	0.813531	0.829573	no change	0	0	21	0	0	6
StLNC0250	-0.310777	0.875924	no change	4	0	2	0	5	3
StLNC0251	-0.533663	0.816561	no change	0	17	22	5	0	31
StLNC0252	-1.23647	0.000695328	down	356	359	799	1089	1654	653
StLNC0253	-0.845548	0.310785	no change	19	10	20	35	54	7
StLNC0254	0.0510557	0.944806	no change	78	102	165	114	48	112
StLNC0255	-0.372283	0.697104	no change	11	14	64	14	27	44
StLNC0256	2.80585	0.111182	no change	1	16	3	2	1	0
StLNC0257	-2.90911	0.330176	no change	0	0	30	0	65	78
StLNC0258	-1.1336	0.113045	no change	12	40	51	41	81	74
StLNC0260	0.633866	0.314607	no change	38	43	82	25	26	38
StLNC0262	-0.356268	0.699099	no change	9	6	7	16	10	3
StLNC0263	-0.799121	0.679581	no change	3	0	5	0	6	6
StLNC0266	0.394136	0.657651	no change	20	26	36	25	6	21
StLNC0268	-1.95969	7.25e-05	down	13	14	28	73	97	36
StLNC0269	-1.46652	0.00449144	down	33	28	36	75	97	83
StLNC0271	-4.59503	0.191918	no change	0	0	0	11	2	0
StLNC0272	1.85556	0.314475	no change	2	5	17	0	7	0
StLNC0273	10.5014	9.08e-15	up	213	237	429	0	0	0
StLNC0274	5.08635	0.132723	no change	11	5	0	0	0	0
StLNC0276	0.34677	0.215241	no change	17856	19572	33694	14738	27167	12278
StLNC0278	0.249119	0.706963	no change	49	25	39	40	42	17
StLNC0279	-2.23486	0.205058	no change	1	0	8	1	8	19
StLNC0283	0.683613	0.261	no change	30	19	74	23	30	16
StLNC0284	4.47229	0.00106548	up	7	11	32	1	1	0
StLNC0285	7.64363	8.21e-06	up	14	64	39	0	0	0
StLNC0286	0.584485	0.187843	no change	165	154	354	116	154	128
StLNC0289	0.0384637	0.940694	no change	286	303	300	289	504	140
StLNC0290	2.4597	0.383819	no change	0	22	72	0	18	0
StLNC0291	-5.46389	0.00286429	down	0	0	2	28	56	2
StLNC0292	2.59765	0.30964	no change	0	4	12	2	0	0
StLNC0293	1.02704	0.706441	no change	5	0	15	0	11	0
StLNC0294	4.6268	0.181942	no change	0	2	17	0	0	0
StLNC0295	1.17637	0.00102231	up	130	148	237	65	84	62
StLNC0296	2.74738	3.44e-07	up	190	368	546	59	78	22
StLNC0297	1.39923	0.00380074	up	32	46	63	13	27	12
StLNC0298	2.11551	0.343866	no change	20	41	0	6	0	7
StLNC0300	0.997845	0.0994135	no change	25	20	32	12	12	12
StLNC0301	1.64166	0.0112721	up	121	127	166	22	47	52
StLNC0302	-5.71704	0.144384	no change	0	0	0	27	0	0
StLNC0303	-1.51953	0.38436	no change	25	0	6	74	14	10
StLNC0304	-2.6129	0.181402	no change	11	0	0	24	34	24
StLNC0305	-0.628245	0.30085	no change	22	19	25	19	51	31
StLNC0306	-1.73329	0.384336	no change	1	0	6	12	8	0
StLNC0308	6.53266	0.000692931	up	3	22	36	0	0	0
StLNC0310	-2.72653	0.133931	no change	0	4	1	27	4	1
StLNC0312	-0.501961	0.523713	no change	4	8	24	16	23	7
StLNC0314	-1.20394	0.578065	no change	4	0	19	19	0	16
StLNC0317	-0.401627	0.667901	no change	2	7	4	5	8	4
StLNC0319	-2.43698	0.157811	no change	0	0	12	17	17	12
StLNC0321	-0.12171	0.966951	no change	0	0	15	1	14	0
StLNC0322	-0.382773	0.618992	no change	4	5	10	7	13	4
StLNC0325	-0.672686	0.426623	no change	7	15	64	30	41	36
StLNC0326	-0.434029	0.569684	no change	38	16	60	61	78	16
StLNC0327	0.938299	0.0809522	no change	55	76	103	55	41	20
StLNC0328	-1.40519	0.357307	no change	0	36	37	95	67	15
StLNC0329	-4.2938	0.030346	down	1	0	116	444	1326	118
StLNC0330	-1.01711	0.319932	no change	4	2	2	6	8	3
StLNC0331	1.02877	0.00618998	up	329	404	777	179	294	198
StLNC0334	-2.19529	0.181267	no change	0	8	4	3	8	31
StLNC0337	-0.403379	0.548589	no change	14	7	19	14	19	16
StLNC0338	-5.03061	0.199693	no change	0	0	0	0	24	0
StLNC0340	0.204159	0.471525	no change	588	617	1221	636	854	471
StLNC0342	-0.475311	0.732644	no change	4	2	10	8	15	0
StLNC0343	-0.182928	0.921134	no change	0	74	110	82	117	3
StLNC0344	-2.31876	0.0432633	down	0	6	14	34	39	13
StLNC0345	1.71769	0.109318	no change	15	7	26	6	1	5
StLNC0346	4.47731	0.114454	no change	114	0	79	0	12	0
StLNC0349	-1.58717	0.0364117	down	9	32	32	95	94	25
StLNC0350	1.03214	0.265905	no change	9	22	27	5	5	13
StLNC0351	-0.927753	0.164321	no change	86	75	172	276	287	61
StLNC0352	-1.41527	0.25352	no change	7	0	13	21	18	9
StLNC0353	0.46871	0.527846	no change	25	17	58	22	43	7
StLNC0354	-0.0290967	0.984729	no change	2	6	8	0	16	2
StLNC0356	-5.373	0.130062	no change	0	0	0	1	29	0
StLNC0357	0.308027	0.650516	no change	35	29	22	22	26	22
StLNC0358	1.02335	0.256484	no change	6	15	7	5	6	3
StLNC0359	1.57211	0.681266	no change	0	0	16	0	5	0
StLNC0360	5.96952	0.127249	no change	28	0	0	0	0	0
StLNC0361	4.94939	0.135485	no change	10	0	7	0	0	0
StLNC0362	1.34447	0.618933	no change	5	5	0	0	6	0
StLNC0363	5.85444	0.0603464	no change	0	17	21	0	0	0
StLNC0364	5.03581	0.122919	no change	0	5	19	0	0	0
StLNC0365	0.425993	0.835646	no change	6	0	13	4	0	6
StLNC0366	-0.961974	0.111252	no change	13	20	36	35	37	43
StLNC0370	1.48583	0.0564414	no change	7	10	19	3	6	3
StLNC0371	0.36267	0.725758	no change	19	11	22	9	4	20
StLNC0372	-0.463611	0.741031	no change	2	2	2	4	5	0
StLNC0376	6.83019	3.7e-05	up	20	27	15	0	0	0
StLNC0378	-6.75419	0.00292195	down	0	0	0	2	65	6
StLNC0379	-0.504251	0.615112	no change	2	4	20	12	16	4
StLNC0380	5.61184	0.0756787	no change	0	9	26	0	0	0
StLNC0381	-0.34577	0.685786	no change	12	15	61	25	21	38
StLNC0383	1.61312	0.244552	no change	29	41	71	0	20	20
StLNC0384	1.12554	0.221987	no change	6	11	27	4	4	8
StLNC0385	-0.757922	0.699018	no change	0	0	19	6	11	6
StLNC0386	-0.450492	0.638876	no change	10	8	29	7	15	28
StLNC0387	0.129469	0.922294	no change	0	4	9	4	4	2
StLNC0388	-1.3513	0.206816	no change	5	4	8	5	8	22
StLNC0389	0.868551	0.819647	no change	0	9	0	5	0	0
StLNC0390	-3.8989	0.315394	no change	1	0	0	15	0	0
StLNC0391	2.52841	0.104911	no change	4	4	8	0	3	0
StLNC0394	0.672071	0.589258	no change	9	6	13	5	15	0
StLNC0397	0.900616	0.510862	no change	3	4	14	0	4	5
StLNC0399	4.60521	0.18022	no change	5	7	0	0	0	0
StLNC0400	0.156425	0.873645	no change	2	3	10	3	6	3
StLNC0401	-0.285551	0.673031	no change	30	66	96	75	137	24
StLNC0402	6.61343	4.29e-08	up	218	318	98	2	6	0
StLNC0403	-0.308677	0.89853	no change	0	37	3	42	10	0
StLNC0404	1.70422	0.539636	no change	0	18	4	0	9	0
StLNC0406	6.04705	0.122345	no change	0	35	0	0	0	0
StLNC0408	0.677007	0.417819	no change	5	7	26	6	8	6
StLNC0409	-5.4731	0.0815408	no change	0	0	0	13	14	0
StLNC0413	0.806739	0.653359	no change	22	7	0	5	18	1
StLNC0416	-0.8833	0.417251	no change	20	4	5	10	35	17
StLNC0418	-0.364187	0.651646	no change	15	15	38	29	54	6
StLNC0419	-0.63176	0.338345	no change	7	12	19	25	21	9
StLNC0421	-1.30536	0.513521	no change	5	0	5	0	12	11
StLNC0422	-1.41005	0.456934	no change	0	0	13	4	11	9
StLNC0423	-6.53263	0.0418753	down	0	0	0	17	0	23
StLNC0424	-3.99625	0.149383	no change	0	4	0	0	79	7
StLNC0425	4.59714	0.171313	no change	7	0	7	0	0	0
StLNC0428	2.37777	2.53e-05	up	74	148	213	16	47	18
StLNC0429	2.32788	0.00773509	up	108	67	153	13	56	5
StLNC0430	0.588157	0.474341	no change	8	14	32	12	6	11
StLNC0431	-1.33595	0.725425	no change	4	0	0	12	0	0
StLNC0433	0.205909	0.765418	no change	20	27	23	26	31	7
StLNC0434	4.74191	0.14713	no change	0	7	11	0	0	0
StLNC0436	4.26692	0.0528112	no change	15	1	2	1	0	0
StLNC0437	5.23309	0.00554643	up	22	11	3	0	1	0
StLNC0438	4.74301	0.226825	no change	12	0	0	0	0	0
StLNC0439	-0.78964	0.789241	no change	0	16	0	5	33	0
StLNC0440	-0.636786	0.776808	no change	0	0	81	27	29	27
StLNC0441	0.41653	0.781554	no change	7	2	27	12	13	0
StLNC0442	-3.25077	0.102594	no change	0	1	5	19	34	0
StLNC0443	-1.08269	0.0542927	no change	32	44	55	110	137	35
StLNC0444	-6.30294	0.0505352	no change	0	0	0	14	0	20
StLNC0445	5.10181	0.193158	no change	0	0	28	0	0	0
StLNC0446	0.306044	0.602205	no change	10	17	24	11	21	8
StLNC0447	-0.435496	0.539927	no change	5	10	22	10	20	14
StLNC0448	-2.08574	0.100193	no change	0	2	10	7	17	15
StLNC0449	0.278207	0.734815	no change	4	16	25	14	15	5
StLNC0451	-0.186736	0.898002	no change	4	9	0	6	8	3
StLNC0452	-0.0667313	0.971993	no change	0	3	8	0	7	3
StLNC0455	0.0395417	0.932972	no change	17	25	37	22	31	19
StLNC0456	-9.4409	0.00422929	down	0	0	0	57	431	0
StLNC0458	-0.557678	0.169132	no change	71	80	133	161	150	82
StLNC0459	0.0152536	0.993257	no change	0	4	5	3	6	0
StLNC0460	4.84955	0.150604	no change	3	0	18	0	0	0
StLNC0462	0.443649	0.334109	no change	25	32	39	21	32	16
StLNC0463	1.44546	0.566674	no change	0	33	2	1	0	9
StLNC0464	-1.07253	0.0858781	no change	18	11	48	47	73	29
StLNC0468	0.152029	0.864063	no change	12	10	34	7	12	21
StLNC0470	2.03318	0.27003	no change	6	5	4	0	0	3
StLNC0471	0.59101	0.485457	no change	40	77	132	70	85	9
StLNC0473	6.36714	3.3e-18	up	193	210	252	3	4	1
StLNC0476	-1.29146	0.132896	no change	6	7	6	9	36	7
StLNC0477	-1.86055	0.0151866	down	15	14	38	106	109	20
StLNC0479	6.84144	0.0329015	up	20	37	0	0	0	0
StLNC0480	-0.39041	0.727746	no change	27	97	224	17	189	163
StLNC0481	1.63535	9.08e-07	up	771	658	1228	245	352	214
StLNC0482	-2.39402	0.380604	no change	0	4	0	8	0	10
StLNC0484	0.366025	0.839261	no change	0	17	163	15	98	10
StLNC0486	3.58626	0.226866	no change	0	0	36	0	1	1
StLNC0487	5.48112	0.0824408	no change	0	10	21	0	0	0
StLNC0488	-4.76962	0.224397	no change	0	0	0	14	0	0
StLNC0490	0.921831	0.212379	no change	29	70	115	39	20	33
StLNC0491	-4.59586	0.0841384	no change	0	0	1	22	3	0
StLNC0492	1.38981	0.135524	no change	8	28	42	4	22	4
StLNC0493	-6.07123	0.120915	no change	0	0	0	0	0	26
StLNC0494	0.869297	0.765687	no change	21	0	18	0	29	0
StLNC0495	0.828955	0.699636	no change	13	0	43	0	24	6
StLNC0496	0.0720672	0.97944	no change	0	0	17	3	11	0
StLNC0497	11.301	7.33e-22	up	1451	1707	1860	1	1	0
StLNC0499	-1.46865	0.29635	no change	3	2	2	4	1	11
StLNC0500	-0.229304	0.77282	no change	53	86	42	90	44	67
StLNC0501	0.845891	0.47979	no change	7	12	15	6	15	0
StLNC0504	-4.07136	0.000286105	down	3	8	8	217	33	35
StLNC0506	1.24149	0.532446	no change	10	19	16	0	25	0
StLNC0508	6.36816	0.000149269	up	19	13	13	0	0	0
StLNC0509	0.70051	0.199761	no change	19	19	47	15	24	10
StLNC0512	-3.09277	0.0398655	down	10	0	2	31	92	12
StLNC0513	-0.841278	0.162902	no change	23	26	40	68	72	19
StLNC0514	-2.58652	0.493469	no change	0	0	9	36	0	0
StLNC0515	4.96642	0.205397	no change	14	0	0	0	0	0
StLNC0516	-0.695707	0.38217	no change	6	3	9	8	16	5
StLNC0518	-1.52574	0.00473298	down	36	34	55	160	132	57
StLNC0519	1.39779	0.710611	no change	0	0	36	9	0	0
StLNC0520	1.37004	0.493291	no change	0	2	17	3	3	0
StLNC0521	0.711347	0.0796282	no change	78	89	168	75	75	40
StLNC0522	-3.33445	2.75e-07	down	3	5	6	37	56	39
StLNC0525	1.26451	0.648451	no change	0	0	15	2	3	0
StLNC0528	1.61926	0.671484	no change	10	0	0	0	0	3
StLNC0529	-0.664064	0.295755	no change	17	26	18	36	30	27
StLNC0530	0.685938	0.413995	no change	16	30	18	12	8	16
StLNC0531	-0.381691	0.784432	no change	5	5	3	11	8	0
StLNC0532	-0.335837	0.713336	no change	3	6	5	7	9	2
StLNC0535	0.137407	0.770847	no change	204	189	182	170	240	127
StLNC0538	0.545632	0.704899	no change	2	6	16	3	14	0
StLNC0539	-0.822829	0.532832	no change	1	13	42	54	13	9
StLNC0542	-1.03357	0.0199007	down	811	1233	2646	3282	3490	1816
StLNC0543	3.8085	2.74e-13	up	272	315	579	17	29	28
StLNC0545	-0.317019	0.698061	no change	5	6	9	7	6	9
StLNC0546	-4.84557	0.0810325	no change	0	0	5	6	133	0
StLNC0547	-0.213524	0.629434	no change	21	34	57	39	52	29
StLNC0548	-0.676025	0.558594	no change	3	6	4	2	5	11
StLNC0549	-3.09005	0.186719	no change	1	1	0	1	24	0
StLNC0550	-0.0310423	0.962286	no change	15	19	25	27	26	7
StLNC0551	-3.32676	0.129878	no change	0	1	8	41	0	18
StLNC0552	-8.88399	0.00915516	down	0	0	0	230	18	0
StLNC0554	6.99799	0.0551374	no change	0	67	1	0	0	0
StLNC0555	-1.44891	0.0511402	no change	8	7	16	38	35	9
StLNC0557	-0.522125	0.437982	no change	9	17	11	20	24	10
StLNC0559	-2.4058	0.00369965	down	10	3	11	48	70	15
StLNC0561	-1.05189	0.371207	no change	0	7	14	11	15	10
StLNC0563	1.87149	0.0241086	up	13	72	115	14	20	13
StLNC0565	-0.0697124	0.934672	no change	15	36	81	13	74	37
StLNC0568	1.2309	0.154726	no change	15	18	14	3	7	9
StLNC0569	1.14811	0.48032	no change	70	91	150	54	0	53
StLNC0573	6.79029	0.00942861	up	0	92	34	0	1	0
StLNC0574	6.23978	0.110799	no change	0	40	0	0	0	0
StLNC0575	-6.00468	0.0532118	no change	0	0	0	12	30	0
StLNC0576	1.12755	0.187755	no change	13	6	12	6	5	3
StLNC0577	6.7979	0.0302958	up	0	44	23	0	0	0
StLNC0580	2.0839	0.260448	no change	6	10	25	8	0	0
StLNC0581	-3.99203	0.300742	no change	0	1	0	16	0	0
StLNC0583	10.951	1.39e-11	up	402	435	210	0	0	0
StLNC0585	0.59995	0.760407	no change	5	0	10	0	8	2
StLNC0586	0.129931	0.776274	no change	153	139	318	143	187	163
StLNC0587	6.4108	0.0378569	up	0	23	34	0	0	0
StLNC0588	-0.742733	0.80161	no change	0	0	36	0	19	20
StLNC0590	0.408127	0.913346	no change	0	0	38	0	27	0
StLNC0591	1.75447	0.142559	no change	43	14	21	17	2	4
StLNC0592	-0.0680766	0.911951	no change	39	51	55	33	48	57
StLNC0593	3.3341	0.00263141	up	10	11	20	0	3	1
StLNC0594	0.723754	0.112663	no change	349	392	720	290	243	244
StLNC0595	-0.280592	0.866272	no change	3	31	25	0	48	22
StLNC0597	-3.55331	0.347932	no change	4	0	0	0	0	42
StLNC0599	-9.52851	1.6e-09	down	0	0	0	163	228	43
StLNC0600	-0.819132	0.356873	no change	9	35	11	25	35	34
StLNC0601	0.236842	0.930375	no change	0	3	8	0	10	0
StLNC0603	0.644569	0.827019	no change	0	24	31	0	41	0
StLNC0604	5.72495	0.14373	no change	0	28	0	0	0	0
StLNC0605	-2.58459	0.324354	no change	0	0	9	19	25	0
StLNC0606	-0.766328	0.0334381	no change	91	141	213	253	326	142
StLNC0608	-6.63202	7.03e-05	down	0	0	0	27	19	8
StLNC0609	-1.12204	0.283765	no change	7	2	14	17	31	3
StLNC0611	0.853605	0.396679	no change	4	9	7	2	3	5
StLNC0612	0.972659	0.654518	no change	11	21	26	0	0	20
StLNC0613	2.6411	0.0557695	no change	103	134	238	38	41	0
StLNC0614	2.96638	0.0748906	no change	6	12	6	3	0	0
StLNC0615	9.93333	2.05e-11	up	399	376	245	0	1	0
StLNC0616	-0.836095	0.823285	no change	0	0	34	40	0	0
StLNC0617	-1.30182	0.438844	no change	5	23	31	28	136	0
StLNC0618	1.04501	0.105007	no change	31	53	82	16	54	12
StLNC0619	-1.05409	0.343085	no change	22	42	3	55	71	32
StLNC0620	-0.0321033	0.956456	no change	49	50	93	39	63	70
StLNC0621	-0.57617	0.584599	no change	7	1	6	7	12	3
StLNC0623	-0.777312	0.064315	no change	27	31	54	56	69	51
StLNC0624	11.4082	1.15e-12	up	1231	286	1634	0	0	1
StLNC0625	2.33055	0.225094	no change	21	37	24	0	22	0
StLNC0627	4.85904	0.215503	no change	13	0	0	0	0	0
StLNC0628	-1.2112	0.423838	no change	22	0	61	63	95	19
StLNC0629	0.195517	0.818651	no change	6	5	7	6	8	2
StLNC0630	1.79898	0.0389973	up	11	19	60	3	14	6
StLNC0632	8.65971	7.11e-11	up	234	350	319	0	0	2
StLNC0633	0.972617	0.475083	no change	19	13	55	22	21	0
StLNC0634	0.374708	0.708811	no change	10	12	36	3	35	7
StLNC0635	0.21091	0.922083	no change	2	2	9	0	0	7
StLNC0636	-2.75297	0.220277	no change	0	1	1	1	15	0
StLNC0637	4.5456	0.247062	no change	0	0	19	0	0	0
StLNC0638	-2.68951	0.326081	no change	0	0	7	0	6	20
StLNC0641	1.55171	0.207315	no change	6	4	9	0	3	3
StLNC0642	0.0360407	0.964505	no change	31	10	35	36	22	13
StLNC0643	-1.80968	0.13245	no change	4	0	11	19	21	7
StLNC0644	5.72495	0.14373	no change	0	28	0	0	0	0
StLNC0647	2.14331	0.432329	no change	12	0	5	4	0	0
StLNC0648	-0.567046	0.453316	no change	4	5	7	7	11	5
StLNC0649	0.760157	0.617836	no change	0	4	7	1	4	1
StLNC0651	11.2277	5.58e-10	up	144	899	308	0	0	0
StLNC0652	-2.15916	0.0566583	no change	0	7	5	22	17	10
StLNC0656	-0.183919	0.818504	no change	4	8	11	4	14	7
StLNC0659	-0.871298	0.249717	no change	14	75	70	62	149	67
StLNC0660	1.04008	0.175421	no change	44	115	219	25	118	34
StLNC0661	5.26148	0.102649	no change	0	6	22	0	0	0
StLNC0662	-4.76962	0.224397	no change	0	0	0	14	0	0
StLNC0663	2.67964	0.0473619	up	23	21	53	3	0	8
StLNC0664	5.74208	0.0663162	no change	0	16	19	0	0	0
StLNC0665	-0.361502	0.837164	no change	1	1	7	1	11	0
StLNC0666	-1.13254	0.520074	no change	0	7	1	1	6	9
StLNC0667	2.3325	0.235653	no change	36	19	51	0	27	0
StLNC0669	0.727954	0.0623776	no change	68	66	140	46	76	35
StLNC0670	0.40204	0.914419	no change	0	39	0	0	43	0
StLNC0671	0.0814528	0.895469	no change	9	17	22	14	14	13
StLNC0672	2.41631	0.369699	no change	3	7	0	2	0	0
StLNC0673	-5.00781	0.0185612	down	0	0	0	6	2	7
StLNC0675	-0.0615661	0.97741	no change	4	0	5	0	1	6
StLNC0677	2.21183	0.159077	no change	5	30	116	0	16	10
StLNC0680	5.64213	0.0745035	no change	0	18	13	0	0	0
StLNC0682	1.24964	0.0735887	no change	43	63	130	14	34	36
StLNC0683	4.95632	0.00660837	up	5	4	10	0	0	0
StLNC0684	7.21109	0.000152905	up	5	115	49	0	1	0
StLNC0685	0.171211	0.94199	no change	57	0	13	42	38	0
StLNC0686	-0.684148	0.195946	no change	26	23	24	41	52	26
StLNC0687	-0.00848427	0.996641	no change	10	0	20	12	19	0
StLNC0689	1.46622	0.39151	no change	10	4	0	3	2	1
StLNC0691	-0.724917	0.719446	no change	0	4	10	10	0	6
StLNC0692	9.37274	3.1e-09	up	92	183	91	0	0	0
StLNC0693	-1.3493	0.644608	no change	0	0	36	32	41	0
StLNC0694	0.246371	0.723749	no change	13	9	18	13	9	9
StLNC0695	3.49578	0.00949597	up	5	22	7	1	1	1
StLNC0696	-0.189055	0.818194	no change	18	14	68	39	57	10
StLNC0697	-0.149747	0.825787	no change	5	10	14	9	16	6
StLNC0698	-5.53896	0.157444	no change	0	0	0	0	0	18
StLNC0699	-2.92239	0.000139621	down	25	15	35	271	256	51
StLNC0700	0.748776	0.112439	no change	36	39	48	26	28	17
StLNC0702	-0.229804	0.867745	no change	4	8	10	0	14	10
StLNC0703	-0.29059	0.695059	no change	6	22	23	15	20	20
StLNC0705	-2.42636	0.527585	no change	0	0	4	0	0	11
StLNC0707	-6.03484	0.0520336	no change	0	0	0	12	31	0
StLNC0709	-1.00017	0.0779761	no change	11	15	23	34	49	14
StLNC0710	-4.73719	0.000907929	down	0	6	3	113	133	8
StLNC0712	-1.11736	0.573533	no change	0	1	8	7	10	0
StLNC0713	-1.39145	0.48933	no change	0	10	5	15	29	0
StLNC0714	-2.61283	0.00565313	down	15	23	7	125	50	90
StLNC0715	0.074922	0.971411	no change	0	11	21	12	0	9
StLNC0716	2.723	0.00081021	up	15	52	59	3	10	5
StLNC0717	7.63399	1.56e-06	up	47	27	35	0	0	0
StLNC0718	2.08437	0.0880922	no change	35	18	42	7	19	0
StLNC0720	-2.31103	0.230293	no change	0	0	18	16	50	7
StLNC0721	10.2022	1.18e-14	up	388	368	597	0	1	0
StLNC0723	0.532474	0.51058	no change	26	23	36	6	24	24
StLNC0724	-2.70575	0.0005514	down	1	5	9	33	32	21
StLNC0726	5.80797	0.0656318	no change	13	0	22	0	0	0
StLNC0728	0.758496	0.41267	no change	33	17	42	16	42	3
StLNC0729	-0.35499	0.869014	no change	6	0	1	7	4	0
StLNC0730	-5.61989	0.108496	no change	0	0	0	0	2	18
StLNC0733	-1.65405	0.219002	no change	0	11	3	11	17	14
StLNC0735	-0.18149	0.66105	no change	74	74	130	70	159	77
StLNC0736	-0.217878	0.810203	no change	3	8	18	11	6	10
StLNC0737	-0.614871	0.56123	no change	87	109	19	182	66	91
StLNC0740	-0.707213	0.241937	no change	13	15	26	17	34	29
StLNC0741	2.16536	0.382758	no change	29	0	1	0	2	5
StLNC0742	1.19295	0.751205	no change	20	0	0	0	15	0
StLNC0743	-0.399411	0.446588	no change	78	51	101	70	124	93
StLNC0746	5.48285	0.161625	no change	20	0	0	0	0	0
StLNC0747	6.2693	0.0527016	no change	0	35	9	0	0	0
StLNC0748	-1.39091	0.0775262	no change	49	17	100	137	99	126
StLNC0749	-0.712712	0.337405	no change	29	39	71	30	72	90
StLNC0750	-0.563157	0.101443	no change	46	55	82	87	118	56
StLNC0751	-2.45679	0.0113874	down	1	2	4	13	9	11
StLNC0752	5.36928	0.0577747	no change	0	63	3	0	2	0
StLNC0753	5.11997	0.110106	no change	0	8	16	0	0	0
StLNC0756	-0.980927	0.717794	no change	337	0	409	746	843	0
StLNC0757	-1.73828	0.141993	no change	0	3	6	6	8	10
StLNC0761	0.275023	0.842533	no change	0	16	27	7	19	6
StLNC0762	0.8752	0.517696	no change	11	8	12	13	4	0
StLNC0763	-1.30402	0.132678	no change	6	13	11	18	14	31
StLNC0764	-5.69068	0.146262	no change	0	0	0	0	38	0
StLNC0765	1.69576	0.49601	no change	46	39	0	0	40	1
StLNC0767	-5.36832	0.170787	no change	0	0	0	0	0	16
StLNC0768	0.954477	0.385566	no change	4	8	17	1	4	7
StLNC0769	-1.23154	0.327276	no change	0	2	9	6	12	4
StLNC0771	-2.78762	0.00181456	down	13	2	19	62	139	37
StLNC0772	4.66411	0.000271232	up	15	13	29	1	0	1
StLNC0773	-0.576057	0.631193	no change	0	8	11	7	12	6
StLNC0774	1.30622	0.524653	no change	0	12	7	1	8	0
StLNC0775	-0.550216	0.340791	no change	131	97	314	280	367	107
StLNC0776	-0.210926	0.723197	no change	63	74	102	58	84	103
StLNC0777	-0.28672	0.563733	no change	15	21	31	22	42	16
StLNC0778	4.77671	0.143498	no change	0	8	10	0	0	0
StLNC0779	0.185203	0.812244	no change	10	6	15	12	7	6
StLNC0781	0.817059	0.102257	no change	47	52	50	27	35	22
StLNC0784	-1.64833	0.232572	no change	3	1	5	20	5	1
StLNC0785	-1.64377	0.0119712	down	7	4	12	18	30	19
StLNC0787	5.68505	0.14657	no change	23	0	0	0	0	0
StLNC0788	-2.82642	0.291783	no change	0	1	95	176	395	0
StLNC0791	0.215805	0.707609	no change	12	20	27	16	26	8
StLNC0792	4.2352	0.00295802	up	4	17	19	1	1	0
StLNC0793	0.0110791	0.994935	no change	26	2	13	33	12	0
StLNC0794	8.63477	3.28e-07	up	24	123	91	0	0	0
StLNC0795	0.640737	0.814974	no change	1	65	2	0	63	0
StLNC0797	5.16512	0.187623	no change	0	19	0	0	0	0
StLNC0799	-0.473186	0.393279	no change	51	95	106	101	212	50
StLNC0800	-8.14417	4.44e-08	down	0	0	0	38	57	51
StLNC0802	1.43616	0.611653	no change	0	17	3	0	10	0
StLNC0803	1.88948	0.077643	no change	3	7	10	2	2	1
StLNC0805	-3.67031	0.000247254	down	1	3	8	54	82	11
StLNC0806	-2.53794	2.36e-06	down	11	10	18	89	87	41
StLNC0809	0.470427	0.491404	no change	9	17	30	17	14	6
StLNC0810	-1.09481	0.113633	no change	60	32	142	162	259	61
StLNC0811	-8.07189	8.57e-06	down	0	0	0	18	134	20
StLNC0813	0.430256	0.464732	no change	13	12	21	9	16	8
StLNC0814	-0.484514	0.568944	no change	10	26	12	16	19	27
StLNC0815	7.90457	1.16e-10	up	174	144	178	1	0	1
StLNC0816	0.414878	0.521072	no change	18	20	35	20	12	16
StLNC0817	-6.16925	0.114982	no change	0	0	0	0	53	0
StLNC0818	-1.8363	0.056401	no change	55	6	65	141	238	78
StLNC0819	-5.06024	0.0399245	down	0	0	2	20	44	0
StLNC0820	0.0650513	0.903796	no change	25	20	53	22	37	26
StLNC0821	-0.589542	0.304592	no change	9	14	14	16	24	14
StLNC0825	-1.28009	0.042192	down	10	11	17	40	37	13
StLNC0826	1.73879	0.644684	no change	0	0	40	0	0	6
StLNC0827	-0.475642	0.180144	no change	64	65	117	115	146	67
StLNC0828	0.215687	0.940691	no change	7	0	23	0	29	0
StLNC0829	1.16288	0.7112	no change	0	66	29	0	0	29
StLNC0836	0.378032	0.480941	no change	54	52	100	49	91	21
StLNC0837	1.44311	0.138913	no change	6	32	40	3	12	10
StLNC0838	5.22661	7.88e-05	up	11	48	78	0	1	2
StLNC0839	0.638429	0.543907	no change	26	24	55	2	40	22
StLNC0840	0.975482	0.664376	no change	40	31	0	16	35	0
StLNC0841	1.55233	0.492733	no change	101	23	1	2	0	36
StLNC0843	1.08656	0.538482	no change	2	1	26	0	10	2
StLNC0845	-1.1488	0.635551	no change	3	39	0	31	93	0
StLNC0846	0.442378	0.716759	no change	19	21	48	1	22	30
StLNC0847	1.40176	0.208727	no change	30	36	50	10	2	22
StLNC0848	0.346977	0.699011	no change	18	32	29	8	15	30
StLNC0850	-4.59816	0.16824	no change	0	0	0	4	12	0
StLNC0851	0.703144	0.0631715	no change	111	126	244	79	110	79
StLNC0852	1.01757	0.552065	no change	56	98	71	87	0	14
StLNC0853	7.3298	0.0104459	up	9	155	0	0	1	0
StLNC0854	-0.592958	0.486673	no change	9	8	18	14	38	4
StLNC0855	-2.11218	0.467412	no change	2	0	2	16	0	0
StLNC0856	-5.26276	0.097712	no change	0	0	0	12	11	0
StLNC0858	-2.20416	0.207664	no change	0	4	0	4	11	5
StLNC0859	0.0446758	0.942183	no change	25	38	61	56	37	18
StLNC0860	5.31809	5.08e-10	up	81	417	639	7	14	5
StLNC0861	0.0255496	0.988321	no change	83	89	151	161	0	93
StLNC0868	0.0802678	0.893854	no change	38	49	55	65	45	21
StLNC0869	2.08221	0.247226	no change	169	279	2022	3	602	5
StLNC0870	-4.3034	6.13e-06	down	14	16	43	195	1254	112
StLNC0871	2.96934	0.261372	no change	8	6	0	2	0	0
StLNC0873	-0.795009	0.217461	no change	12	36	41	42	88	24
StLNC0876	-1.52075	0.342913	no change	1	34	20	84	79	1
StLNC0877	0.192509	0.948437	no change	0	23	7	0	35	0
StLNC0880	-0.491311	0.64109	no change	3	2	3	5	4	2
StLNC0881	5.10019	0.00248506	up	24	115	162	0	10	0
StLNC0882	5.99621	0.000119337	up	137	130	63	0	7	0
StLNC0883	-1.269	0.179716	no change	8	25	5	33	31	28
StLNC0885	6.42076	0.041645	up	0	11	53	0	0	0
StLNC0886	-1.37501	0.4549	no change	0	0	11	4	11	6
StLNC0889	0.568044	0.519518	no change	3	7	10	4	7	2
StLNC0892	-0.39807	0.589863	no change	16	15	9	20	27	10
StLNC0893	5.42915	0.00760594	up	2	6	22	0	0	0
StLNC0894	3.44553	0.0777836	no change	6	1	5	0	0	1
StLNC0895	6.14144	0.0726444	no change	2	0	54	0	0	0
StLNC0898	0.0779918	0.97782	no change	0	2	8	7	0	0
StLNC0900	-4.10646	0.0200811	down	2	4	0	32	108	1
StLNC0903	-6.59766	0.000284238	down	0	0	0	27	8	13
StLNC0904	3.11976	0.153827	no change	20	19	1	0	0	4
StLNC0905	-0.31761	0.610532	no change	17	21	19	29	21	18
StLNC0906	0.560132	0.646022	no change	2	7	18	1	5	8
StLNC0907	-0.534071	0.621249	no change	6	2	3	8	7	2
StLNC0908	-0.173574	0.956171	no change	39	0	0	0	55	11
StLNC0909	1.01729	0.227558	no change	20	7	49	10	19	6
StLNC0910	-0.901967	0.341092	no change	2	8	9	18	11	4
StLNC0912	5.7183	0.144201	no change	0	0	43	0	0	0
StLNC0913	-5.83503	0.0810864	no change	0	0	0	24	0	4
StLNC0914	-4.95116	0.206991	no change	0	0	0	0	0	12
StLNC0915	0.594586	0.447917	no change	5	8	13	7	6	3
StLNC0917	4.12242	8.13e-13	up	223	370	284	12	28	12
StLNC0920	-0.88371	0.0366617	no change	29	35	49	71	98	37
StLNC0923	3.37547	0.156916	no change	0	1	33	1	0	1
StLNC0924	3.61278	0.00394864	up	959	125	84	29	45	37
StLNC0925	-2.2404	0.307708	no change	0	2	3	1	26	0
StLNC0926	0.217156	0.572826	no change	120	110	193	89	159	98
StLNC0927	-1.05631	0.739768	no change	0	49	0	20	120	0
StLNC0928	1.06256	0.736105	no change	0	48	0	0	5	15
StLNC0929	1.20807	0.550406	no change	3	10	6	0	0	6
StLNC0930	-1.14217	0.0173918	down	53	52	116	134	270	78
StLNC0932	1.98526	0.0933158	no change	12	19	32	0	12	4
StLNC0933	-2.26165	0.362716	no change	11	25	0	0	243	12
StLNC0934	-6.20226	6.88e-05	down	3	3	1	10	660	42
StLNC0935	1.48295	0.0182211	up	39	51	48	13	15	18
StLNC0936	2.39101	0.0506414	no change	29	60	89	13	23	0
StLNC0939	0.0186454	0.994998	no change	0	14	15	0	0	18
StLNC0940	4.08659	0.281075	no change	0	0	56	0	3	0
StLNC0944	-0.0427885	0.960343	no change	4	12	29	10	12	15
StLNC0946	0.0561644	0.871048	no change	63	83	110	78	97	59
StLNC0949	6.23445	0.000403526	up	5	13	32	0	0	0
StLNC0951	0.837496	0.758574	no change	0	4	10	6	0	0
StLNC0953	0.302024	0.642478	no change	11	19	36	21	22	7
StLNC0954	2.32971	0.198624	no change	9	8	19	0	0	5
StLNC0955	1.51566	0.57706	no change	7	4	0	0	6	0
StLNC0957	1.75358	0.000705286	up	119	162	131	41	64	23
StLNC0958	8.4262	1.51e-08	up	62	38	109	0	0	0
StLNC0959	-1.16482	0.0453026	down	58	64	55	169	187	62
StLNC0961	7.12096	0.0319342	up	9	63	0	0	0	0
StLNC0965	-0.0548531	0.959227	no change	10	27	8	16	6	20
StLNC0966	-1.12374	0.0557988	no change	7	15	23	31	47	16
StLNC0967	-0.355432	0.451349	no change	30	55	73	75	81	36
StLNC0968	5.87188	0.133642	no change	0	31	0	0	0	0
StLNC0971	1.63889	0.260078	no change	49	61	120	0	37	29
StLNC0972	1.39658	0.606792	no change	10	0	13	0	11	0
StLNC0973	4.6741	0.154873	no change	0	7	10	0	0	0
StLNC0975	0.79474	0.557279	no change	6	3	4	2	7	0
StLNC0977	-3.563	0.364369	no change	0	1	0	0	0	9
StLNC0978	0.296082	0.89912	no change	19	0	22	29	2	0
StLNC0981	-2.67288	0.241951	no change	0	2	2	21	1	0
StLNC0982	-0.38406	0.419553	no change	20	38	57	51	60	29
StLNC0985	4.57757	0.21513	no change	0	12	1	0	0	0
StLNC0986	0.10878	0.824247	no change	18	23	37	19	28	20
StLNC0988	0.5522	0.70723	no change	2	5	9	3	0	5
StLNC0989	0.452549	0.606509	no change	33	76	70	15	36	60
StLNC0991	0.547317	0.156828	no change	94	109	198	93	124	47
StLNC0993	-0.476446	0.487287	no change	74	98	185	182	278	42
StLNC0994	-0.339938	0.645904	no change	20	13	25	16	54	10
StLNC0996	-0.120275	0.858421	no change	6	11	11	9	12	8
StLNC1000	-0.196464	0.948566	no change	0	19	0	20	3	0
StLNC1002	-0.169526	0.819237	no change	9	7	15	13	8	10
StLNC1003	6.09833	0.119185	no change	0	0	56	0	0	0
StLNC1004	-0.812435	0.163018	no change	14	20	18	35	43	15
StLNC1005	0.0537126	0.945962	no change	11	14	17	15	25	3
StLNC1006	-4.76529	0.167716	no change	0	0	0	10	0	3
StLNC1008	-0.180939	0.830567	no change	5	6	17	9	19	3
StLNC1010	-0.123331	0.86189	no change	290	327	734	635	680	120
StLNC1011	4.93913	0.207932	no change	0	0	25	0	0	0
StLNC1012	-0.71684	0.312067	no change	7	10	13	23	14	9
StLNC1014	-0.496158	0.379077	no change	8	16	25	20	26	17
StLNC1015	0.828107	0.128171	no change	19	23	48	12	20	14
StLNC1017	-0.304841	0.714303	no change	12	18	10	20	30	5
StLNC1018	0.699069	0.852596	no change	0	19	0	0	0	9
StLNC1019	1.18771	0.678363	no change	0	2	21	7	0	0
StLNC1020	-1.33122	0.196881	no change	11	112	32	147	114	110
StLNC1023	-1.03399	0.639575	no change	0	15	7	0	9	26
StLNC1025	-4.69207	0.0922554	no change	0	0	1	2	0	18
StLNC1026	-2.66693	0.491153	no change	0	0	3	13	0	0
StLNC1027	-0.581874	0.427236	no change	19	102	103	108	122	74
StLNC1028	2.26697	0.545517	no change	0	63	0	0	19	0
StLNC1029	-0.64931	0.829131	no change	2861	0	0	1660	1859	1848
StLNC1030	4.4081	2.81e-08	up	112	225	115	4	14	5
StLNC1032	8.98398	2.21e-05	up	337	5	182	0	0	1
StLNC1033	-6.2146	0.000171629	down	0	0	0	16	11	11
StLNC1035	0.491764	0.557297	no change	27	66	63	20	23	49
StLNC1037	2.80786	0.358173	no change	44	0	3	0	0	6
StLNC1038	-1.31435	0.00164022	down	726	909	1249	1728	4234	1383
StLNC1040	-2.83842	0.142033	no change	0	3	5	28	26	0
StLNC1041	0.207956	0.93244	no change	17	0	1	2	23	0
StLNC1043	-0.227538	0.648515	no change	76	78	113	75	107	104
StLNC1044	-0.863817	0.235116	no change	9	8	15	20	34	6
StLNC1045	6.37733	0.103101	no change	0	44	0	0	0	0
StLNC1047	-5.06753	0.137684	no change	0	0	0	4	0	10
StLNC1048	-0.651152	0.367303	no change	4	10	11	10	22	7
StLNC1049	0.475932	0.898749	no change	0	42	0	0	44	0
StLNC1050	-3.26629	0.037765	down	0	0	5	18	8	9
StLNC1052	4.5456	0.247062	no change	0	0	19	0	0	0
StLNC1053	5.82064	0.00702349	up	15	11	2	0	0	0
StLNC1056	-1.1483	0.00119692	down	322	476	622	849	1661	626
StLNC1057	-1.87542	0.0145234	down	3	16	28	52	58	38
StLNC1058	-3.33347	0.0385836	down	3	0	0	13	17	6
StLNC1061	-5.1079	0.158356	no change	0	0	0	17	1	0
StLNC1064	4.73835	0.0131711	up	3	4	10	0	0	0
StLNC1065	-0.778562	0.183645	no change	15	10	20	27	37	13
StLNC1066	-1.51019	0.646403	no change	0	47	0	15	0	91
StLNC1068	2.13054	0.0804431	no change	10	15	6	4	4	0
StLNC1070	-4.34969	0.0140152	down	3	6	8	83	320	0
StLNC1071	-1.68697	0.0990071	no change	11	1	13	18	52	14
StLNC1073	-0.647217	0.683267	no change	5	5	3	6	0	11
StLNC1074	-2.42477	0.335734	no change	0	0	3	0	7	5
StLNC1076	-5.0408	0.00490073	down	0	0	0	6	8	4
StLNC1077	-0.42001	0.617022	no change	11	10	23	11	12	25
StLNC1078	-4.89915	0.00392876	down	21	2	1	341	683	8
StLNC1079	-0.44257	0.371541	no change	13	16	26	21	30	19
StLNC1080	0.236707	0.786273	no change	124	61	280	92	290	31
StLNC1081	-0.0416029	0.974749	no change	4	6	4	5	12	0
StLNC1082	7.44789	0.0171369	up	0	29	98	0	0	0
StLNC1083	4.27873	0.267113	no change	0	20	0	0	1	0
StLNC1084	0.45859	0.811195	no change	2	0	8	2	5	0
StLNC1085	-5.06729	0.196389	no change	0	0	0	0	0	13
StLNC1089	0.595101	0.835767	no change	0	1	13	0	9	0
StLNC1091	-0.548409	0.846867	no change	0	0	23	16	9	0
StLNC1092	-0.911894	0.666711	no change	2	8	0	0	13	8
StLNC1093	1.04408	0.527754	no change	210	176	281	150	214	0
StLNC1096	-1.23045	0.746127	no change	0	5	0	0	0	9
StLNC1099	6.41091	0.101289	no change	38	0	0	0	0	0
StLNC1101	0.546044	0.746476	no change	12	12	0	5	2	9
StLNC1106	1.52452	0.380234	no change	5	40	0	4	8	5
StLNC1107	-0.49932	0.481881	no change	6	10	30	15	32	12
StLNC1109	-1.05373	0.116682	no change	722	748	385	1146	2260	895
StLNC1110	-1.89073	0.185547	no change	0	20	25	15	95	42
StLNC1111	-1.24134	0.0961905	no change	9	7	7	23	26	8
StLNC1112	-0.483159	0.517845	no change	18	7	29	26	39	10
StLNC1113	-0.904356	0.537447	no change	0	39	50	44	90	22
StLNC1114	-1.64898	0.238809	no change	3	9	0	18	19	6
StLNC1120	0.904639	0.423012	no change	6	3	37	7	4	7
StLNC1121	3.10488	0.26635	no change	0	39	42	0	0	6
StLNC1122	0.27435	0.729668	no change	25	21	13	24	17	10
StLNC1124	0.933784	0.378898	no change	16	6	19	3	4	11
StLNC1125	1.57171	0.263971	no change	1	3	40	5	4	2
StLNC1127	1.93309	3.47e-07	up	159	217	240	52	74	34
StLNC1128	0.973465	0.565847	no change	17	24	48	0	3	28
StLNC1129	0.875859	0.25551	no change	8	8	13	3	7	5
StLNC1132	0.913512	0.49875	no change	4	6	4	0	3	4
StLNC1134	7.08331	3.5e-05	up	30	92	19	0	1	0
StLNC1136	0.447174	0.625861	no change	25	14	44	5	23	25
StLNC1137	-0.686788	0.817039	no change	0	0	41	0	32	16
StLNC1138	3.01845	0.219935	no change	0	7	9	0	2	0
StLNC1139	-0.608591	0.21376	no change	58	80	112	123	211	54
StLNC1141	-2.2243	0.303368	no change	2	2	0	18	3	0
StLNC1142	2.04193	0.000545762	up	225	210	516	40	84	77
StLNC1144	0.477757	0.818925	no change	181	200	0	156	205	3
StLNC1145	1.58341	0.000891592	up	85	81	138	26	35	32
StLNC1146	-0.610349	0.325502	no change	24	27	54	65	35	39
StLNC1147	0.227568	0.76652	no change	12	8	20	7	10	13
StLNC1148	-0.521551	0.741733	no change	0	3	7	3	1	6
StLNC1150	4.52797	0.173224	no change	0	7	8	0	0	0
StLNC1151	0.28029	0.829139	no change	4	7	8	0	9	6
StLNC1154	0.794658	0.271112	no change	112	132	222	61	205	26
StLNC1156	-1.12589	0.149336	no change	12	37	22	27	63	56
StLNC1157	-1.22845	0.0993842	no change	11	14	23	52	20	26
StLNC1158	6.37667	0.000687537	up	19	4	27	0	0	0
StLNC1159	0.782184	0.792544	no change	0	26	42	0	45	0
StLNC1160	-0.312499	0.914652	no change	0	0	39	18	20	0
StLNC1162	9.97326	3.42e-12	up	1178	731	1969	0	0	3
StLNC1163	7.26901	7.55e-07	up	32	83	59	1	0	0
StLNC1166	-0.462998	0.797211	no change	0	3	78	33	51	5
StLNC1168	3.38848	0.0082779	up	266	273	14	10	42	14
StLNC1169	0.465536	0.365812	no change	179	237	182	114	191	128
StLNC1170	1.1219	0.152453	no change	107	132	137	37	146	17
StLNC1172	0.767249	0.719543	no change	0	4	12	0	1	5
StLNC1173	5.96952	0.127249	no change	28	0	0	0	0	0
StLNC1176	-1.26703	0.00739385	down	111	69	155	288	293	183
StLNC1177	-1.44237	0.00639376	down	75	109	168	234	277	317
StLNC1178	0.639527	0.743522	no change	0	9	8	0	4	5
StLNC1179	5.71538	4.58e-05	up	35	17	50	0	2	0
StLNC1180	0.00643904	0.995234	no change	3	5	8	3	13	1
StLNC1181	-0.668624	0.434858	no change	5	3	8	5	9	9
StLNC1182	-2.04611	0.270016	no change	0	8	0	13	12	9
StLNC1184	-2.86826	0.0253132	down	17	15	166	699	454	34
StLNC1185	8.18581	2.23e-05	up	13	24	177	0	0	0
StLNC1187	0.00608173	0.992943	no change	8	9	10	7	14	6
StLNC1190	-1.14547	0.163083	no change	7	4	12	17	30	5
StLNC1193	1.81038	0.363256	no change	3	7	92	0	1	15
StLNC1194	1.74108	0.141934	no change	6	5	13	0	5	2
StLNC1196	0.688259	0.0597476	no change	181	318	381	155	226	135
StLNC1198	-1.5479	0.464032	no change	0	9	5	14	0	17
StLNC1199	-2.12726	0.346254	no change	0	4	12	50	4	0
StLNC1202	0.651156	0.754883	no change	2	7	7	0	0	7
StLNC1204	2.02867	0.0760388	no change	16	16	35	4	14	0
StLNC1205	1.57644	0.582511	no change	13	14	0	10	0	0
StLNC1207	0.107081	0.758789	no change	197	239	490	243	326	208
StLNC1208	0.0967771	0.896139	no change	5	6	14	7	8	6
StLNC1210	-5.74292	0.0658053	no change	0	0	0	17	15	0
StLNC1212	1.39273	0.402425	no change	35	5	7	4	22	0
StLNC1213	2.02687	0.346007	no change	6	2	1	0	0	2
StLNC1214	6.33012	0.0528073	no change	0	5	58	0	0	0
StLNC1215	3.17	0.000139489	up	243	162	344	26	61	5
StLNC1217	3.71614	0.00479325	up	21	8	8	1	1	1
StLNC1219	5.36031	1.07e-06	up	95	233	441	6	13	0
StLNC1220	-2.48566	0.155337	no change	0	0	9	19	8	8
StLNC1221	0.759428	0.492588	no change	9	34	40	5	7	25
StLNC1222	-0.446501	0.586071	no change	3	4	7	6	8	4
StLNC1223	-0.421108	0.55537	no change	52	45	30	42	67	62
StLNC1226	-1.9478	0.31131	no change	4	0	0	10	7	2
StLNC1227	-4.68643	0.232719	no change	0	0	0	0	0	10
StLNC1228	-1.42359	0.629973	no change	0	0	38	22	65	0
StLNC1229	6.78049	0.0554433	no change	48	0	2	0	0	0
StLNC1230	0.78364	0.602431	no change	1	2	7	0	3	2
StLNC1231	-0.993229	0.084668	no change	10	13	20	35	31	15
StLNC1232	5.3378	0.173132	no change	0	0	33	0	0	0
StLNC1233	5.87502	2.96e-17	up	198	318	402	3	11	2
StLNC1234	-1.10441	0.200041	no change	3	4	7	11	16	3
StLNC1235	1.15565	0.572609	no change	10	7	6	0	0	8
StLNC1237	0.251627	0.875438	no change	0	41	150	41	40	37
StLNC1239	-5.22729	0.152855	no change	0	0	0	0	1	14
StLNC1240	0.610199	0.604987	no change	25	11	31	5	4	25
StLNC1242	-2.17269	0.569174	no change	3	0	0	16	0	0
StLNC1243	0.950051	0.00494075	no change	151	167	249	104	117	61
StLNC1244	6.58951	0.092072	no change	43	0	0	0	0	0
StLNC1245	-0.17699	0.898092	no change	5	5	14	0	16	9
StLNC1248	1.99514	0.472653	no change	0	23	19	9	0	0
StLNC1249	-1.78177	0.541226	no change	7	0	0	22	0	5
StLNC1250	-0.919353	0.0766364	no change	9	14	18	23	33	18
StLNC1251	-0.05027	0.933691	no change	44	53	73	56	110	20
StLNC1253	-0.52351	0.538634	no change	36	13	41	51	77	11
StLNC1254	-5.31085	0.0994704	no change	0	0	0	0	14	8
StLNC1255	-1.58886	0.317238	no change	6	18	10	37	85	0
StLNC1256	-0.344522	0.904979	no change	0	6	8	0	0	11
StLNC1257	2.95821	0.0436135	up	88	251	148	53	1	4
StLNC1258	-2.11628	0.0566954	no change	0	9	13	28	34	20
StLNC1262	1.41811	0.396852	no change	12	0	58	13	4	3
StLNC1263	-1.98023	0.0159194	down	3	4	4	8	23	12
StLNC1264	-3.07315	0.00437304	down	3	7	11	43	143	7
StLNC1265	3.55174	0.128975	no change	1	0	30	1	1	0
StLNC1268	6.83643	2.64e-06	up	146	267	127	0	6	0
StLNC1270	-1.02858	0.215549	no change	7	5	7	20	12	6
StLNC1271	5.76571	0.0342208	up	23	1	1	0	0	0
StLNC1272	-0.00912032	0.989235	no change	10	23	32	20	37	8
StLNC1273	0.606676	0.53138	no change	14	8	37	20	5	7
StLNC1275	0.157731	0.808741	no change	532	388	295	310	486	341
StLNC1277	0.0503116	0.868099	no change	207	300	365	248	380	191
StLNC1278	0.736111	0.625398	no change	6	0	23	5	3	5
StLNC1279	-5.21014	0.183906	no change	0	0	0	19	0	0
StLNC1280	5.83323	0.106615	no change	1	29	0	0	0	0
StLNC1281	4.55487	0.0174864	up	3	5	6	0	0	0
StLNC1282	-0.207144	0.743756	no change	17	11	41	24	38	13
StLNC1285	-0.633325	0.401355	no change	22	16	17	16	32	34
StLNC1286	6.5683	0.0358019	up	26	0	30	0	0	0
StLNC1287	-2.85069	0.00325513	down	4	4	7	8	67	32
StLNC1289	4.89698	0.0143998	up	3	3	14	0	0	0
StLNC1292	1.34107	0.0789881	no change	13	18	27	9	4	7
StLNC1293	0.353737	0.899678	no change	8	0	10	0	18	0
StLNC1297	1.02575	0.444644	no change	15	13	31	0	12	13
StLNC1298	2.12572	0.412782	no change	7	0	16	0	6	0
StLNC1299	-0.351486	0.862572	no change	0	6	4	0	3	7
StLNC1301	0.16943	0.731879	no change	136	106	260	178	155	81
StLNC1303	-0.372801	0.708869	no change	6	2	6	3	7	7
StLNC1305	0.337753	0.841537	no change	55	71	19	0	76	50
StLNC1306	0.440994	0.816931	no change	0	7	10	0	7	4
StLNC1308	1.36191	0.405353	no change	3	17	2	2	9	0
StLNC1310	0.296339	0.801526	no change	43	22	8	14	10	33
StLNC1311	0.0883746	0.975756	no change	0	0	14	1	11	0
StLNC1313	-1.26045	0.643664	no change	0	0	14	14	12	0
StLNC1314	0.217041	0.916176	no change	16	0	14	16	12	0
StLNC1315	-0.376525	0.894233	no change	0	4	2	7	0	0
StLNC1316	-1.16563	0.0799018	no change	9	13	8	20	28	19
StLNC1317	0.117819	0.78418	no change	40	60	111	64	81	36
StLNC1318	-1.79104	0.179321	no change	7	9	0	25	25	13
StLNC1319	-0.162415	0.901699	no change	6	4	10	7	18	0
StLNC1320	-0.274107	0.700014	no change	12	12	19	25	20	6
StLNC1325	-1.33343	0.065554	no change	74	27	54	145	121	115
StLNC1326	0.242393	0.744424	no change	7	6	15	6	13	4
StLNC1327	2.25964	0.187783	no change	3	4	16	0	5	0
StLNC1328	-2.46358	0.000602944	down	4	3	6	27	24	16
StLNC1329	1.39462	0.377639	no change	16	2	1	1	3	4
StLNC1330	-0.614657	0.496974	no change	6	5	7	12	15	2
StLNC1331	-1.06415	0.132112	no change	41	59	84	166	194	32
StLNC1332	-5.82408	0.00313026	down	0	0	0	19	5	5
StLNC1333	4.99542	0.202729	no change	0	0	26	0	0	0
StLNC1334	-7.28103	0.0178406	down	0	0	0	45	50	0
StLNC1335	1.01044	0.00364742	up	657	756	1357	329	576	367
StLNC1338	1.5568	0.53253	no change	18	0	131	34	0	2
StLNC1339	0.544066	0.446297	no change	21	29	30	7	29	18
StLNC1341	9.646	3.46e-12	up	128	115	243	0	0	0
StLNC1342	1.69365	0.347347	no change	14	2	1	0	3	3
StLNC1343	-0.308093	0.556724	no change	73	72	113	75	104	109
StLNC1345	0.175921	0.764459	no change	18	16	32	20	30	8
StLNC1346	5.5779	0.154407	no change	0	0	39	0	0	0
StLNC1347	-1.25766	0.180525	no change	3	4	17	16	10	18
StLNC1348	0.268649	0.713438	no change	21	46	27	19	25	29
StLNC1349	10.3433	1.65e-05	up	751	1	694	1	0	0
StLNC1350	2.25363	0.249187	no change	1	10	20	0	7	0
StLNC1353	1.16129	0.467794	no change	65	73	17	3	2	52
StLNC1355	-1.11743	0.392522	no change	5	0	5	4	15	4
StLNC1361	0.841861	0.521157	no change	3	3	5	4	2	0
StLNC1363	-5.17476	0.186941	no change	0	0	0	0	0	14
StLNC1366	0.378263	0.920235	no change	10	0	0	0	0	7
StLNC1367	3.21774	0.0109378	up	83	75	7	4	16	3
StLNC1368	-1.35521	0.177258	no change	11	13	40	20	24	75
StLNC1369	-1.02091	0.0770908	no change	9	10	13	20	33	12
StLNC1370	6.09451	0.000127345	up	8	13	21	0	0	0
StLNC1374	8.83414	0.00750916	up	32	0	315	0	0	0
StLNC1375	-0.599453	0.236024	no change	38	43	76	88	64	60
StLNC1376	0.597318	0.826136	no change	189	298	0	287	0	48
StLNC1380	-0.359716	0.78603	no change	11	7	47	8	4	42
StLNC1381	-1.26404	0.685118	no change	30	0	0	0	71	28
StLNC1384	5.06895	0.0597513	no change	0	110	87	0	7	0
StLNC1385	-0.0576035	0.932127	no change	8	12	15	11	21	5
StLNC1388	5.7183	0.144201	no change	0	0	43	0	0	0
StLNC1389	-0.459184	0.878006	no change	0	0	54	28	30	0
StLNC1390	-1.89087	0.295974	no change	0	6	0	8	11	5
StLNC1394	11.1534	4.16e-13	up	475	439	314	0	0	0
StLNC1395	4.31768	0.00526422	up	6	7	10	0	1	0
StLNC1396	0.3145	0.917557	no change	0	1	21	12	0	0
StLNC1398	-2.36526	0.472541	no change	0	0	79	0	33	184
StLNC1399	-0.2132	0.602545	no change	79	109	174	139	203	68
StLNC1400	0.137578	0.971017	no change	0	0	14	0	12	0
StLNC1404	-0.140453	0.806402	no change	12	17	17	14	21	14
StLNC1406	7.7114	0.0146942	up	63	0	56	0	0	0
StLNC1407	1.11582	0.0113863	up	38	49	87	21	32	21
StLNC1408	0.980006	0.309287	no change	28	27	63	4	51	9
StLNC1409	2.91608	0.0831492	no change	5	7	6	0	0	2
StLNC1410	0.462483	0.725098	no change	3	12	12	10	10	0
StLNC1413	3.18812	0.217471	no change	0	14	6	2	0	0
StLNC1414	-0.11958	0.804458	no change	26	37	37	34	55	21
StLNC1415	0.745904	0.253864	no change	10	10	22	8	9	6
StLNC1416	-0.00387147	0.997379	no change	14	19	19	4	6	31
StLNC1418	0.247777	0.89336	no change	2	27	0	17	4	4
StLNC1419	-0.0436285	0.989024	no change	0	0	83	43	0	10
StLNC1420	3.35948	0.10429	no change	13	0	26	0	1	2
StLNC1421	0.119503	0.761426	no change	154	154	295	208	215	102
StLNC1422	2.72721	0.164411	no change	42	43	21	0	23	0
StLNC1424	-0.0617634	0.983104	no change	5	10	0	0	24	0
StLNC1426	-1.68246	0.568012	no change	0	0	7	0	1	11
StLNC1430	-4.66272	0.235131	no change	0	0	0	13	0	0
StLNC1431	-0.913388	0.454624	no change	11	30	3	8	43	36
StLNC1432	-0.122182	0.650502	no change	296	351	479	391	503	284
StLNC1433	-0.482924	0.543643	no change	7	7	26	22	23	6
StLNC1437	-1.54036	0.165351	no change	0	4	6	7	15	5
StLNC1438	-0.405869	0.425266	no change	70	52	123	76	118	99
StLNC1439	-1.9274	0.483496	no change	0	0	10	15	0	8
StLNC1441	2.40407	0.167932	no change	10	10	130	0	3	14
StLNC1442	0.171016	0.955665	no change	0	0	69	0	16	22
StLNC1443	2.17054	0.116006	no change	4	5	7	1	0	2
StLNC1446	-3.71612	0.343624	no change	0	1	0	0	0	10
StLNC1448	1.72201	0.3466	no change	13	7	1	0	1	5
StLNC1451	2.9844	0.435286	no change	0	0	26	0	3	0
StLNC1455	1.08838	0.286198	no change	3	18	17	2	10	5
StLNC1457	-8.11521	4.44e-07	down	0	0	0	25	60	57
StLNC1460	-0.69994	0.15493	no change	36	31	68	79	100	34
StLNC1462	0.628629	0.730933	no change	1	1	20	5	0	4
StLNC1463	10.8022	1.86e-15	up	664	573	743	1	0	0
StLNC1465	0.405516	0.913673	no change	0	40	0	0	44	0
StLNC1466	-6.29149	0.000175956	down	2	0	0	107	24	31
StLNC1467	-0.316664	0.699322	no change	4	6	13	13	9	4
StLNC1469	-0.448984	0.627776	no change	22	9	10	25	12	18
StLNC1472	0.438622	0.615299	no change	26	14	15	18	24	4
StLNC1473	-4.63155	0.0159289	down	0	0	0	4	5	4
StLNC1474	-2.96112	1.62e-10	down	12	21	35	181	193	111
StLNC1475	9.78801	8.1e-13	up	143	160	214	0	0	0
StLNC1477	5.29642	0.0463881	up	1	19	1	0	0	0
StLNC1480	3.4193	0.0163525	up	13	9	15	0	4	0
StLNC1481	0.651011	0.77354	no change	5	0	64	23	11	0
StLNC1482	0.0367596	0.955501	no change	6	15	21	13	14	10
StLNC1483	4.83153	0.145208	no change	0	4	17	0	0	0
StLNC1485	-0.0509134	0.943891	no change	6	6	18	7	13	8
StLNC1486	1.01733	0.221517	no change	6	6	15	5	4	3
StLNC1487	5.33686	0.00329769	up	5	11	7	0	0	0
StLNC1488	-0.789221	0.332745	no change	5	36	33	41	48	28
StLNC1489	5.37543	2.19e-05	up	17	35	40	1	0	1
StLNC1490	0.131088	0.946016	no change	0	11	6	6	11	0
StLNC1493	-0.578178	0.737626	no change	24	0	59	56	59	3
StLNC1494	0.814998	0.295246	no change	9	13	29	8	6	10
StLNC1496	11.0478	1.63e-46	up	5458	4012	8214	1	4	3
StLNC1498	-0.506139	0.510056	no change	12	36	24	42	23	28
StLNC1500	7.81984	1.3e-07	up	308	151	394	0	0	3
StLNC1503	3.62594	0.163488	no change	0	21	14	0	0	2
StLNC1505	0.956326	0.28017	no change	9	35	14	12	14	5
StLNC1508	-2.70976	0.0905525	no change	0	0	3	3	8	5
StLNC1511	0.424668	0.85289	no change	9	2	1	0	14	0
StLNC1512	-0.871603	0.118347	no change	38	21	57	79	90	37
StLNC1513	6.10339	0.0613529	no change	5	0	47	0	0	0
StLNC1514	-0.169447	0.795014	no change	18	14	21	19	36	8
StLNC1515	-1.93218	0.347957	no change	15	0	0	28	29	15
StLNC1516	1.8661	0.000452064	up	202	215	367	56	59	73
StLNC1517	9.82868	5.44e-07	up	23	344	170	0	0	0
StLNC1519	0.370106	0.853425	no change	0	8	12	6	0	5
StLNC1520	3.11988	0.0742678	no change	1	1	35	1	1	1
StLNC1521	-0.505086	0.757835	no change	2	3	1	0	3	5
StLNC1522	0.00690239	0.986527	no change	78	81	132	112	108	56
StLNC1524	6.12726	0.11743	no change	0	37	0	0	0	0
StLNC1526	-0.308017	0.596223	no change	12	27	43	22	43	27
StLNC1527	-0.667633	0.468941	no change	6	3	4	8	6	6
StLNC1528	-5.61296	0.151911	no change	0	0	0	0	36	0
StLNC1530	1.60658	0.672288	no change	0	15	0	5	0	0
StLNC1531	0.455429	0.868974	no change	0	0	17	4	6	0
StLNC1532	-1.53392	0.322612	no change	0	46	122	144	194	67
StLNC1533	1.06856	0.096931	no change	24	16	25	12	13	6
StLNC1537	2.19425	0.271712	no change	2	7	2	0	0	2
StLNC1538	-0.694232	0.332571	no change	5	5	13	14	13	7
StLNC1540	0.0216357	0.974752	no change	29	21	43	15	34	34
StLNC1541	-3.05125	0.0050732	down	0	4	2	14	27	9
StLNC1544	2.69686	0.204866	no change	26	34	0	3	10	0
StLNC1545	5.04706	0.117814	no change	0	11	10	0	0	0
StLNC1547	5.12353	0.109393	no change	0	10	13	0	0	0
StLNC1549	-4.76962	0.224397	no change	0	0	0	14	0	0
StLNC1551	-1.37418	0.489746	no change	0	0	24	10	15	16
StLNC1552	-0.332211	0.794013	no change	3	11	86	60	17	14
StLNC1553	-6.11864	0.0475537	down	0	0	0	21	21	0
StLNC1554	5.00451	0.201897	no change	0	17	0	0	0	0
StLNC1555	-0.0424885	0.973939	no change	8	9	10	16	14	0
StLNC1556	1.4023	0.07191	no change	19	8	22	5	8	5
StLNC1557	-0.281677	0.700488	no change	4	7	11	6	12	7
StLNC1559	-0.316296	0.579502	no change	140	157	347	353	210	146
StLNC1560	0.182965	0.845154	no change	20	9	49	15	11	27
StLNC1562	-0.539898	0.617875	no change	900	367	970	483	3358	171
StLNC1564	-4.76913	0.224447	no change	0	0	0	0	20	0
StLNC1565	5.08474	0.0465255	up	23	0	12	0	1	0
StLNC1567	7.98296	0.000119117	up	80	34	8	0	0	0
StLNC1568	-1.64803	0.665557	no change	0	0	6	0	18	0
StLNC1570	0.638767	0.280377	no change	39	26	51	32	24	15
StLNC1571	6.41091	0.101289	no change	38	0	0	0	0	0
StLNC1573	-2.92008	0.266193	no change	0	0	3	2	20	0
StLNC1574	-1.80155	0.256988	no change	0	4	1	5	14	1
StLNC1575	3.70429	0.00056988	up	70	144	27	3	15	4
StLNC1576	-0.0489502	0.923925	no change	35	51	55	45	83	23
StLNC1578	0.434929	0.770129	no change	1	2	6	0	4	2
StLNC1579	-2.91109	0.217951	no change	0	46	0	40	69	198
StLNC1583	3.89591	0.00169508	up	6	17	25	0	2	1
StLNC1584	-1.31732	0.394861	no change	5	6	24	44	37	0
StLNC1585	4.7241	0.228709	no change	0	14	0	0	0	0
StLNC1586	1.96854	0.0708611	no change	3	19	13	3	5	1
StLNC1589	-1.23934	0.741146	no change	12	0	0	34	0	0
StLNC1591	1.42369	0.0473838	up	8	14	21	4	7	4
StLNC1595	7.76455	0.0163985	up	65	38	0	0	0	0
StLNC1596	-1.42612	0.49926	no change	27	0	1	72	3	11
StLNC1597	0.318982	0.878087	no change	13	10	0	10	15	0
StLNC1599	1.32594	0.331651	no change	6	4	26	0	7	5
StLNC1600	0.30562	0.594328	no change	21	26	37	20	19	22
StLNC1601	0.183017	0.693306	no change	61	74	137	85	69	59
StLNC1603	0.960313	0.639295	no change	10	4	14	13	0	0
StLNC1604	0.956622	0.556899	no change	60	143	201	130	72	0
StLNC1605	-1.36142	0.521923	no change	0	5	0	7	1	4
StLNC1606	4.75751	0.000463079	up	16	14	22	0	2	0
StLNC1607	-0.289204	0.679247	no change	10	29	50	44	34	18
StLNC1608	0.924465	0.174852	no change	18	33	41	14	11	17
StLNC1610	-2.6335	0.360569	no change	0	5	0	2	42	0
StLNC1611	-2.84118	0.0314717	down	0	21	19	105	134	34
StLNC1612	5.64798	8.67e-06	up	104	1880	856	14	48	3
StLNC1613	5.24762	0.180591	no change	17	0	0	0	0	0
StLNC1615	-3.12884	0.12002	no change	0	3	0	3	3	16
StLNC1618	0.230134	0.709516	no change	12	13	19	9	14	12
StLNC1619	-2.2036	0.105619	no change	0	4	1	7	6	8
StLNC1620	2.01725	0.0489289	up	4	19	25	5	2	3
StLNC1622	2.53142	0.229672	no change	15	0	35	2	0	4
StLNC1623	-1.26139	0.663493	no change	0	0	15	0	4	16
StLNC1624	-6.49482	0.000520289	down	0	0	5	76	341	7
StLNC1627	-0.665774	0.151189	no change	68	78	117	82	220	107
StLNC1628	0.0278641	0.973313	no change	8	7	5	7	8	5
StLNC1629	-1.51075	0.614026	no change	0	16	0	33	0	10
StLNC1630	0.682522	0.535512	no change	63	71	108	107	10	17
StLNC1632	-1.01607	0.125387	no change	5	5	12	14	17	10
StLNC1633	0.301569	0.910222	no change	0	3	6	0	8	0
StLNC1636	-0.104571	0.873363	no change	11	12	31	24	18	10
StLNC1637	0.834234	0.675734	no change	3	4	2	5	0	0
StLNC1638	-0.188783	0.835733	no change	6	11	8	11	18	2
StLNC1639	0.824447	0.226155	no change	30	29	31	9	21	19
StLNC1640	0.527351	0.325149	no change	53	38	93	43	64	19
StLNC1641	-1.09393	0.770957	no change	0	12	0	26	0	0
StLNC1642	-5.79448	0.0885205	no change	0	0	0	0	37	2
StLNC1643	-1.1643	0.377299	no change	62	4	145	51	79	214
StLNC1644	-0.305453	0.761596	no change	31	28	5	23	41	25
StLNC1645	6.52935	0.00175881	up	32	4	11	0	0	0
StLNC1652	0.133044	0.911921	no change	50	50	7	12	35	52
StLNC1653	9.12517	8.97e-08	up	155	42	108	0	0	0
StLNC1654	-1.28896	0.23227	no change	2	1	3	3	7	4
StLNC1656	1.01835	0.60202	no change	0	5	164	39	7	9
StLNC1657	-0.94417	0.197662	no change	10	20	22	16	35	38
StLNC1658	0.297817	0.781836	no change	2	13	10	2	10	7
StLNC1660	4.37499	0.00155331	up	14	23	32	3	0	0
StLNC1661	1.15874	0.072848	no change	13	24	29	11	14	4
StLNC1662	5.68446	0.146612	no change	0	0	42	0	0	0
StLNC1663	0.913561	0.807395	no change	0	0	54	0	27	0
StLNC1664	3.64259	0.140368	no change	0	5	12	1	0	0
StLNC1667	2.51809	0.224666	no change	0	24	11	3	0	2
StLNC1668	0.684166	0.392284	no change	26	35	33	13	12	26
StLNC1669	1.19182	0.224937	no change	6	22	17	3	5	9
StLNC1670	-0.638071	0.487853	no change	2	5	9	9	5	7
StLNC1671	1.1811	0.351577	no change	3	11	11	3	9	0
StLNC1672	-2.14628	0.0221518	down	49	27	9	144	195	95
StLNC1674	0.201117	0.927038	no change	0	16	43	19	0	15
StLNC1675	0.278192	0.656089	no change	13	25	41	27	23	10
StLNC1680	-4.05294	0.00145085	down	4	0	13	123	43	55
StLNC1681	0.0225164	0.956051	no change	31	41	63	37	65	27
StLNC1685	-8.21969	2.23e-07	down	0	0	0	29	62	61
StLNC1687	-4.11816	0.036677	down	0	0	18	93	18	79
StLNC1688	3.18397	0.0125079	up	13	7	22	3	0	1
StLNC1690	-0.860033	0.622802	no change	62	0	14	88	27	34
StLNC1692	-2.32389	0.124487	no change	2	1	2	2	28	1
StLNC1694	-5.3902	0.11724	no change	0	0	0	3	0	14
StLNC1696	0.0191375	0.995989	no change	0	0	10	0	0	5
StLNC1697	-1.80996	0.0476982	down	15	47	55	160	242	22
StLNC1699	-0.0597014	0.925927	no change	14	11	19	9	26	11
StLNC1700	0.567325	0.177904	no change	52	88	120	62	70	34
StLNC1701	-2.692	0.00237482	down	4	4	15	27	33	56
StLNC1703	-0.796348	0.312252	no change	3	7	17	18	15	8
StLNC1705	8.13178	2.61e-15	up	159	321	434	1	1	1
StLNC1706	4.91227	3.59e-14	up	110	91	172	3	6	3
StLNC1709	5.78368	0.139629	no change	0	0	45	0	0	0
StLNC1710	0.432991	0.623084	no change	23	6	31	7	21	14
StLNC1711	9.19029	2.25e-16	up	412	450	885	0	3	0
StLNC1712	-0.939666	0.272132	no change	24	15	108	116	74	41
StLNC1714	3.47526	0.00241443	up	12	16	13	1	3	0
StLNC1716	1.07802	0.148477	no change	6	18	25	6	9	6
StLNC1717	7.96254	4.02e-07	up	19	53	87	0	0	0
StLNC1718	0.858425	0.014135	no change	80	92	124	50	72	37
StLNC1719	-0.514647	0.731429	no change	16	0	8	5	18	13
StLNC1720	1.36014	0.452026	no change	6	8	8	0	11	0
StLNC1722	3.69505	0.0329821	up	4	3	21	0	2	0
StLNC1723	-1.25222	0.380705	no change	0	6	10	13	3	12
StLNC1728	-1.72915	0.197987	no change	6	8	0	21	26	8
StLNC1729	5.07889	0.00508192	up	6	7	6	0	0	0
StLNC1730	1.21286	0.428994	no change	6	5	23	1	15	0
StLNC1731	1.01537	0.307665	no change	7	39	108	13	21	24
StLNC1732	-0.395888	0.54887	no change	21	9	23	20	37	14
StLNC1733	0.600273	0.271746	no change	76	106	160	74	54	68
StLNC1738	1.65386	0.0104329	up	259	277	530	67	87	130
StLNC1739	1.09465	0.572195	no change	3	3	6	0	0	4
StLNC1740	6.16255	0.115317	no change	32	0	0	0	0	0
StLNC1741	-0.48278	0.808555	no change	0	4	8	0	4	8
StLNC1744	1.29167	0.169458	no change	277	541	343	87	72	238
StLNC1745	9.52237	2.05e-08	up	55	247	119	0	0	0
StLNC1747	0.123763	0.951952	no change	541	1151	0	216	1576	271
StLNC1750	-0.715994	0.808425	no change	0	0	43	18	41	0
StLNC1751	1.22324	0.106798	no change	39	48	55	8	21	26
StLNC1753	-5.25189	0.180373	no change	0	0	0	0	28	0
StLNC1755	0.346444	0.720849	no change	49	34	49	64	40	5
StLNC1758	-1.39739	0.063192	no change	9	5	12	19	44	9
StLNC1759	1.4825	0.000258214	up	601	643	1239	222	315	259
StLNC1760	5.46284	0.163177	no change	0	0	36	0	0	0
StLNC1761	5.96374	0.12762	no change	0	0	51	0	0	0
StLNC1763	0.428463	0.770259	no change	24	7	20	11	36	0
StLNC1764	-1.4083	0.166588	no change	7	21	3	27	52	15
StLNC1765	4.91696	0.210007	no change	0	16	0	0	0	0
StLNC1766	8.20023	0.00888936	up	0	80	117	0	0	0
StLNC1767	4.8195	0.219314	no change	0	0	23	0	0	0
StLNC1768	-3.78723	0.148863	no change	0	4	0	34	31	0
StLNC1769	-5.53488	0.0777097	no change	0	0	0	14	14	0
StLNC1770	0.692104	0.717175	no change	3	0	6	0	3	2
StLNC1771	1.08479	0.632756	no change	10	31	6	0	0	17
StLNC1772	0.663535	0.389732	no change	58	59	39	54	36	14
StLNC1774	0.478435	0.844067	no change	25	0	64	0	4	37
StLNC1775	0.918243	0.705815	no change	0	166	39	45	83	0
StLNC1776	-1.51572	0.473948	no change	0	0	19	2	19	16
StLNC1777	-2.3043	0.222459	no change	0	9	0	9	21	16
StLNC1778	0.701131	0.469922	no change	11	4	8	7	4	3
StLNC1779	-1.28677	0.494517	no change	1	0	35	46	14	3
StLNC1780	0.384006	0.591038	no change	6	10	19	10	11	4
StLNC1781	-0.0509366	0.931402	no change	27	30	34	17	54	25
StLNC1783	0.224741	0.768227	no change	13	11	30	11	31	5
StLNC1784	-0.0468155	0.960833	no change	5	4	4	3	5	5
StLNC1785	-0.874543	0.302937	no change	11	4	16	10	39	10
StLNC1786	-0.992444	0.587261	no change	0	4	5	7	11	0
StLNC1788	0.0311188	0.982375	no change	0	12	13	10	11	2
StLNC1793	-0.295014	0.837336	no change	4	4	4	0	14	3
StLNC1794	-2.71539	0.0433319	down	4	7	5	61	2	28
StLNC1795	0.334662	0.905296	no change	8	0	11	0	19	0
StLNC1798	0.453317	0.451027	no change	48	66	122	71	38	40
StLNC1799	0.283628	0.781751	no change	5	8	4	4	3	6
StLNC1800	0.99437	0.514228	no change	7	6	37	0	22	3
StLNC1802	6.51871	0.00804778	up	2	2	68	0	0	0
StLNC1803	0.941932	0.569139	no change	3	0	16	3	1	3
StLNC1805	3.24748	0.188182	no change	0	14	11	0	3	0
StLNC1806	1.80305	0.195918	no change	8	5	3	0	3	2
StLNC1808	-0.259619	0.479282	no change	158	207	329	300	349	147
StLNC1809	0.72488	0.0690377	no change	73	125	136	62	84	48
StLNC1810	0.608761	0.680829	no change	3	3	3	2	0	3
StLNC1812	1.56279	0.0466711	up	21	25	69	10	7	14
StLNC1814	1.77621	0.0249953	up	22	64	119	16	36	6
StLNC1815	0.0195273	0.988462	no change	3	6	10	0	10	7
StLNC1816	-0.475151	0.427982	no change	33	34	25	50	56	27
StLNC1817	3.04649	0.269058	no change	15	0	4	0	0	2
StLNC1820	-0.239174	0.870806	no change	0	27	20	7	34	13
StLNC1821	0.805245	0.182496	no change	18	31	24	13	17	11
StLNC1822	-0.107766	0.959999	no change	3	2	6	0	0	8
StLNC1823	1.18373	0.567779	no change	65	519	17	225	67	0
StLNC1824	-1.72051	0.379114	no change	28	2	7	113	28	0
StLNC1825	0.395473	0.620304	no change	5	13	15	8	6	8
StLNC1830	-0.81909	0.705356	no change	0	0	24	2	13	13
StLNC1831	-2.94438	0.00199638	down	2	4	4	30	45	6
StLNC1833	-0.439045	0.907608	no change	0	8	0	11	0	0
StLNC1834	-0.898321	0.670541	no change	14	0	7	16	34	0
StLNC1835	-0.0722514	0.926691	no change	7	19	16	20	19	5
StLNC1836	1.49615	0.256783	no change	81	94	131	56	1	32
StLNC1837	5.50488	0.00124526	up	9	7	10	0	0	0
StLNC1838	-0.853819	0.351706	no change	6	17	4	16	20	14
StLNC1839	2.34664	0.164528	no change	6	4	6	3	0	0
StLNC1840	4.10214	0.293949	no change	15	0	0	0	0	1
StLNC1842	6.75475	7.14e-07	up	204	687	2007	1	26	1
StLNC1843	-0.464133	0.263078	no change	40	52	101	89	113	48
StLNC1844	-0.42419	0.657309	no change	5	4	3	7	5	4
StLNC1845	-0.271927	0.665672	no change	9	8	15	9	18	10
StLNC1847	-2.7857	0.230518	no change	0	0	50	144	111	5
StLNC1848	-0.102191	0.917243	no change	2	19	42	18	28	12
StLNC1850	7.50469	0.0164822	up	0	67	45	0	0	0
StLNC1855	5.72495	0.14373	no change	0	28	0	0	0	0
StLNC1857	6.5904	0.0920277	no change	0	51	0	0	0	0
StLNC1858	-0.104712	0.874653	no change	8	10	14	7	19	8
StLNC1859	1.18693	0.343166	no change	7	12	10	0	6	6
StLNC1860	3.8632	5.77e-08	up	468	386	232	30	32	18
StLNC1861	5.67447	0.070462	no change	0	16	17	0	0	0
StLNC1863	0.570854	0.6726	no change	8	10	12	15	5	0
StLNC1865	0.648918	0.189304	no change	65	107	166	48	78	66
StLNC1866	-0.0579045	0.936282	no change	84	122	132	191	70	64
StLNC1867	0.509789	0.740974	no change	0	29	49	22	23	4
StLNC1868	-4.86994	0.174359	no change	0	0	0	1	20	0
StLNC1870	0.0669667	0.972092	no change	0	4	14	5	11	0
StLNC1872	-0.861507	0.272073	no change	15	26	53	37	32	65
StLNC1873	-0.557211	0.499556	no change	69	242	112	289	140	155
StLNC1874	4.75574	0.225561	no change	0	0	22	0	0	0
StLNC1875	4.86379	0.0074739	up	5	5	7	0	0	0
StLNC1876	0.163343	0.965451	no change	0	0	19	0	16	0
StLNC1879	-0.652614	0.397496	no change	11	4	13	18	15	9
StLNC1881	4.04732	5.4e-08	up	210	213	118	13	17	6
StLNC1882	-9.41829	6.53e-10	down	0	0	0	83	124	137
StLNC1883	3.8801	0.177175	no change	0	1	43	2	0	0
StLNC1885	-4.72112	0.220134	no change	0	1	0	0	0	20
StLNC1886	-0.341234	0.906971	no change	8	0	7	18	0	0
StLNC1887	0.984371	0.157066	no change	30	49	57	25	41	6
StLNC1889	-2.94797	0.171726	no change	2	0	3	0	5	23
StLNC1891	-0.46784	0.509545	no change	5	8	11	8	19	6
StLNC1892	-0.368952	0.857748	no change	0	4	5	1	12	0
StLNC1894	-0.00853055	0.989088	no change	37	45	37	34	37	42
StLNC1895	5.33849	8.31e-05	up	14	41	25	1	1	0
StLNC1898	-2.04836	0.441296	no change	0	0	5	9	0	4
StLNC1899	0.348521	0.778144	no change	4	32	36	4	53	5
StLNC1900	6.35997	3.23e-09	up	62	142	139	3	1	0
StLNC1901	-3.79297	0.144645	no change	0	3	0	11	44	0
StLNC1902	1.62315	0.000934617	up	292	274	492	79	117	113
StLNC1903	5.15984	0.188081	no change	16	0	0	0	0	0
StLNC1904	-0.323325	0.543927	no change	13	14	34	20	32	18
StLNC1905	-1.29744	0.445882	no change	53	2	11	81	139	1
StLNC1906	-3.16837	0.0123571	down	3	0	3	20	34	4
StLNC1907	0.00630627	0.995056	no change	5	8	18	11	19	1
StLNC1910	-1.67661	0.0065974	down	32	54	35	149	203	60
StLNC1911	-1.92081	4.56e-09	down	742	757	995	3274	3798	2146
StLNC1912	-0.209451	0.773106	no change	10	21	12	14	30	9
StLNC1913	-1.11171	0.123556	no change	5	5	11	13	13	14
StLNC1914	1.53424	0.259273	no change	9	1	34	1	8	4
StLNC1917	0.759349	0.426946	no change	8	8	12	1	9	6
StLNC1918	1.2998	0.512009	no change	6	8	3	7	0	0
StLNC1922	-4.90579	0.211246	no change	0	0	0	0	22	0
StLNC1925	6.37681	2.53e-07	up	200	172	87	1	6	0
StLNC1930	0.481835	0.899472	no change	0	0	11	0	0	4
StLNC1932	5.60592	0.0839761	no change	0	5	32	0	0	0
StLNC1935	3.51533	0.195343	no change	0	21	57	0	0	4
StLNC1937	0.774004	0.706399	no change	11	4	0	5	7	0
StLNC1941	1.8905	0.290096	no change	9	14	15	0	13	0
StLNC1942	-5.13695	0.179386	no change	0	0	2	52	0	0
StLNC1944	0.610529	0.708732	no change	12	11	0	2	6	8
StLNC1945	-0.716773	0.632489	no change	0	19	32	14	13	33
StLNC1948	1.12282	0.350975	no change	4	6	8	0	5	3
StLNC1949	-0.330333	0.622681	no change	20	17	58	41	58	14
StLNC1950	-0.186833	0.791732	no change	11	9	11	8	14	12
StLNC1951	5.36724	0.00222499	up	492	743	808	0	63	1
StLNC1952	0.4916	0.286968	no change	43	48	67	25	51	32
StLNC1953	-1.01397	0.490592	no change	0	19	71	44	49	42
StLNC1954	-0.805941	0.180437	no change	11	14	12	17	29	18
StLNC1955	-1.01851	0.0715783	no change	13	21	19	42	46	19
StLNC1956	-0.253124	0.890387	no change	0	4	5	6	4	0
StLNC1957	0.277823	0.890641	no change	0	2	14	0	6	4
StLNC1958	1.03602	0.0771489	no change	47	68	66	28	24	29
StLNC1959	-1.2708	0.155903	no change	13	10	12	9	33	37
StLNC1961	-2.62698	0.0877177	no change	26	24	35	448	5	26
StLNC1964	1.0158	0.146516	no change	7	17	25	7	9	6
StLNC1965	-6.66251	0.0885441	no change	0	0	0	52	0	0
StLNC1967	-0.0601551	0.938698	no change	24	30	65	16	36	50
StLNC1969	7.45153	3.31e-07	up	28	35	38	0	0	0
StLNC1971	3.55442	0.0538438	no change	37	20	61	0	0	7
StLNC1972	-5.40813	0.094129	no change	0	0	0	5	24	0
StLNC1973	1.11554	0.401081	no change	6	9	8	5	0	4
StLNC1974	3.8498	0.189576	no change	0	0	54	1	2	0
StLNC1975	-0.354486	0.506711	no change	15	23	35	19	44	25
StLNC1977	0.195238	0.894885	no change	6	4	7	10	0	3
StLNC1978	0.623687	0.249129	no change	28	31	54	31	23	14
StLNC1979	-0.236672	0.931518	no change	0	0	12	0	6	4
StLNC1981	1.57987	0.674183	no change	0	33	0	0	16	0
StLNC1982	-2.73295	0.270196	no change	0	0	3	10	6	0
StLNC1983	-0.245778	0.815875	no change	9	10	20	3	11	23
StLNC1985	-0.279939	0.827024	no change	24	29	16	2	24	49
StLNC1986	2.24383	0.00148456	up	18	34	38	7	10	2
StLNC1987	-1.224	0.526396	no change	0	4	11	12	21	0
StLNC1990	5.00451	0.201897	no change	0	17	0	0	0	0
StLNC1995	1.25308	0.0945628	no change	14	48	49	10	15	16
StLNC1996	-1.16549	0.187145	no change	5	7	3	9	12	12
StLNC1997	0.42387	0.895959	no change	0	0	140	46	0	17
StLNC1998	2.7151	2.62e-05	up	216	193	449	26	35	49
StLNC1999	-1.82453	0.453132	no change	0	6	0	1	1	15
StLNC2001	0.339964	0.699013	no change	6	10	28	5	10	13
StLNC2002	2.11294	0.00533821	up	21	22	26	2	9	5
StLNC2004	3.91364	1.67e-12	up	69	104	141	5	10	5
StLNC2007	0.586728	0.818607	no change	40	0	197	105	0	10
StLNC2008	11.5324	2.73e-05	up	550	914	1	0	0	0
StLNC2009	-0.192508	0.77578	no change	7	15	11	12	16	9
StLNC2010	1.49241	0.00033876	up	853	777	1631	249	575	284
StLNC2011	0.105936	0.900148	no change	7	30	34	12	45	10
StLNC2012	0.103225	0.881746	no change	9	9	20	15	10	7
StLNC2013	0.385971	0.823953	no change	5	0	85	13	38	6
StLNC2014	2.63181	0.206548	no change	46	89	89	0	47	0
StLNC2015	-0.319392	0.781063	no change	7	2	4	3	4	8
StLNC2016	2.09756	0.0868546	no change	2	13	7	2	2	1
StLNC2017	2.97004	0.0709544	no change	55	4	2	2	8	1
StLNC2018	-0.976852	0.45608	no change	4	0	10	4	10	9
StLNC2019	0.568235	0.43733	no change	10	11	13	10	10	3
StLNC2021	0.921548	0.20264	no change	23	17	47	16	9	14
StLNC2022	-1.56961	0.273623	no change	0	19	35	40	25	52
StLNC2023	6.17226	3.22e-06	up	50	54	34	0	1	1
StLNC2026	0.593968	0.100452	no change	88	124	181	86	118	48
StLNC2027	1.49063	0.00219775	up	85	72	149	25	42	33
StLNC2032	-4.22997	0.266604	no change	1	0	0	0	27	0
StLNC2033	-1.13343	0.442996	no change	27	0	52	69	54	30
StLNC2034	6.74566	0.000604717	up	4	13	60	0	0	0
StLNC2035	0.0926397	0.911523	no change	9	39	42	21	19	30
StLNC2036	1.11158	0.354696	no change	5	5	10	0	6	3
StLNC2037	1.01001	0.688255	no change	16	0	1	0	1	7
StLNC2038	-1.3847	0.0889375	no change	14	10	28	59	20	35
StLNC2039	-1.20687	0.389149	no change	0	4	4	8	2	5
StLNC2040	3.22391	0.0081001	up	12	46	93	5	11	0
StLNC2043	-2.49039	0.334498	no change	0	0	7	17	14	0
StLNC2044	-0.21322	0.895625	no change	19	0	23	4	12	24
StLNC2047	-0.277339	0.882408	no change	0	626	1149	449	779	522
StLNC2048	1.25811	0.565572	no change	33	17	37	34	0	0
StLNC2049	-0.326575	0.737866	no change	6	2	7	8	9	2
StLNC2050	-0.169824	0.799692	no change	11	13	10	13	15	10
StLNC2054	5.20641	1.21e-07	up	74	94	55	1	2	3
StLNC2056	0.191461	0.670296	no change	106	174	169	150	143	86
StLNC2059	0.0116256	0.995099	no change	0	10	13	1	1	13
StLNC2061	-0.229315	0.707959	no change	7	13	19	14	22	8
StLNC2062	7.47874	1.27e-06	up	17	30	68	0	0	0
StLNC2063	-0.00148043	0.996952	no change	37	44	72	40	67	38
StLNC2065	-0.166305	0.906764	no change	6	8	0	6	8	4
StLNC2068	2.64974	0.0506477	no change	7	3	9	0	2	1
StLNC2069	1.1006	0.773199	no change	0	9	0	0	6	0
StLNC2070	-0.64676	0.543992	no change	1	12	29	22	27	8
StLNC2071	0.33812	0.766336	no change	332	70	49	156	92	134
StLNC2072	-1.1644	0.0554239	no change	149	169	147	436	548	139
StLNC2073	5.9675	0.0805263	no change	0	2	48	0	0	0
StLNC2074	-1.30298	0.0160167	down	14	11	15	33	41	23
StLNC2076	-0.728941	0.484404	no change	9	10	2	18	11	8
StLNC2077	-3.50792	0.187217	no change	2	0	0	14	0	9
StLNC2078	-0.896772	0.076015	no change	28	18	34	45	59	39
StLNC2079	-5.37533	0.00139741	down	0	0	3	51	55	4
StLNC2080	0.635415	0.865704	no change	0	0	33	14	0	0
StLNC2081	-0.297966	0.885416	no change	0	9	13	14	0	6
StLNC2082	1.05174	0.0362189	up	72	83	113	33	42	43
StLNC2083	-5.89384	0.132263	no change	0	0	0	0	0	23
StLNC2090	1.02584	0.622958	no change	20	8	23	0	33	0
StLNC2091	4.2798	6.07e-12	up	596	862	686	23	41	41
StLNC2092	0.0750195	0.881818	no change	18	33	57	31	46	19
StLNC2094	0.867435	0.256923	no change	45	20	31	25	21	9
StLNC2096	2.1251	0.213345	no change	1	11	36	2	0	5
StLNC2097	4.10278	0.0434278	up	3	1	20	0	0	1
StLNC2098	0.367448	0.838579	no change	65	0	7	32	27	10
StLNC2100	-0.549561	0.647879	no change	2	2	5	8	3	1
StLNC2101	0.430345	0.586751	no change	4	8	19	6	8	6
StLNC2102	-0.428604	0.519029	no change	37	21	74	48	106	24
StLNC2103	-3.09063	0.128986	no change	1	1	0	7	15	0
StLNC2105	-0.874541	0.564115	no change	6	0	22	13	5	18
StLNC2106	6.53177	0.0342372	up	0	25	37	0	0	0
StLNC2107	-2.07287	0.237881	no change	0	3	0	3	6	4
StLNC2109	-0.641003	0.826265	no change	5	0	5	0	0	11
StLNC2110	0.742869	0.64757	no change	59	96	182	0	110	72
StLNC2112	-0.271084	0.85149	no change	0	12	17	3	23	7
StLNC2113	4.85904	0.215503	no change	13	0	0	0	0	0
StLNC2114	-0.765405	0.331915	no change	19	8	11	19	41	12
StLNC2116	0.93468	0.68843	no change	11	30	110	0	87	0
StLNC2117	-1.75225	0.177899	no change	6	4	0	12	20	8
StLNC2118	3.54488	0.0620337	no change	7	2	3	0	1	0
StLNC2120	-1.50556	0.23772	no change	0	6	8	17	6	9
StLNC2123	-0.488616	0.742149	no change	0	22	53	33	51	9
StLNC2124	0.927186	0.105129	no change	214	221	342	72	155	145
StLNC2125	-0.016844	0.979403	no change	38	78	91	101	70	28
StLNC2126	-6.01449	0.124458	no change	0	0	0	0	0	25
StLNC2128	1.87718	0.481427	no change	0	4	16	4	0	0
StLNC2129	-0.539072	0.523384	no change	21	39	62	88	73	11
StLNC2131	-2.1881	0.136761	no change	5	0	3	11	31	2
StLNC2133	0.87726	0.25757	no change	6	21	25	10	13	4
StLNC2134	-1.8307	0.000456002	down	11	18	26	58	104	32
StLNC2135	-2.09262	0.588126	no change	2	0	0	10	0	0
StLNC2137	6.50868	0.0369723	up	21	0	36	0	0	0
StLNC2138	-0.173854	0.951282	no change	0	9	0	0	9	3
StLNC2141	-4.76962	0.224397	no change	0	0	0	14	0	0
StLNC2142	0.399575	0.887498	no change	6	0	2	0	9	0
StLNC2143	2.5269	0.0425672	up	18	14	3	3	3	1
StLNC2146	0.0133279	0.996153	no change	0	3	6	7	0	0
StLNC2148	0.326455	0.641813	no change	57	60	100	71	94	14
StLNC2149	0.252059	0.821875	no change	53	15	151	9	105	51
StLNC2150	2.055	0.592864	no change	0	0	18	0	4	0
StLNC2152	-0.975008	0.218738	no change	5	4	5	7	15	6
StLNC2154	-1.05983	0.497052	no change	12	0	10	32	9	4
StLNC2155	0.757836	0.461631	no change	204	22	309	111	168	38
StLNC2158	-1.94617	0.4818	no change	0	7	0	0	22	9
StLNC2159	1.25894	0.0270192	up	27	34	73	16	30	8
StLNC2160	6.08771	0.119834	no change	0	36	0	0	0	0
StLNC2162	5.07156	0.0549756	no change	1	16	1	0	0	0
StLNC2164	-1.46238	0.468472	no change	2	0	2	5	0	4
StLNC2165	-0.267319	0.898112	no change	0	0	31	10	8	7
StLNC2167	10.2183	9.95e-12	up	555	199	574	1	0	0
StLNC2170	-0.994468	0.663329	no change	0	0	79	14	45	44
StLNC2172	0.0297737	0.984271	no change	26	15	18	0	40	22
StLNC2173	-2.91459	0.157782	no change	5	0	3	19	58	0
StLNC2175	-1.25572	0.185436	no change	5	12	9	31	8	16
StLNC2177	0.0770536	0.8991	no change	12	17	29	10	25	16
StLNC2180	0.711414	0.150031	no change	27	38	54	18	40	14
StLNC2185	0.280349	0.839806	no change	0	3	9	3	3	2
StLNC2190	1.30649	0.461203	no change	0	11	125	5	13	18
StLNC2193	1.73953	0.275425	no change	9	7	3	1	0	4
StLNC2195	0.961138	0.475673	no change	4	4	3	0	4	2
StLNC2198	1.18238	0.68579	no change	0	9	36	0	0	11
StLNC2199	-4.69561	0.23179	no change	0	0	0	0	19	0
StLNC2200	-1.21616	0.535688	no change	0	4	0	2	3	4
StLNC2201	0.903656	0.332349	no change	27	7	14	6	15	7
StLNC2202	-3.16842	0.250475	no change	3	0	0	0	7	20
StLNC2203	-0.540861	0.662472	no change	2	2	6	1	12	2
StLNC2208	7.01816	0.00210155	up	1	22	70	0	0	0
StLNC2209	8.4675	1.83e-06	up	158	18	247	0	0	1
StLNC2211	0.683686	0.316327	no change	430	726	522	249	785	150
StLNC2212	5.55345	0.15624	no change	21	0	0	0	0	0
StLNC2215	0.919817	0.135125	no change	128	101	171	50	59	79
StLNC2217	-0.159607	0.879607	no change	58	69	8	49	95	35
StLNC2218	-0.475754	0.610344	no change	3	10	12	4	24	7
StLNC2221	-0.91562	0.144193	no change	56	64	94	192	162	46
StLNC2224	-0.992119	0.561095	no change	78	3	25	4	293	13
StLNC2226	5.776	1.22e-16	up	269	845	1493	14	21	8
StLNC2227	5.33036	0.173738	no change	18	0	0	0	0	0
StLNC2229	-4.96337	0.147247	no change	0	0	0	2	20	0
StLNC2231	5.15989	0.173835	no change	0	0	57	0	0	1
StLNC2232	0.861945	0.777538	no change	8	26	0	0	0	15
StLNC2234	12.6796	2.15e-20	up	2439	2198	2586	0	0	1
StLNC2237	1.8103	0.397471	no change	15	24	5	0	0	10
StLNC2238	-0.768404	0.553936	no change	0	4	5	2	8	4
StLNC2239	5.64981	0.149113	no change	0	0	41	0	0	0
StLNC2241	5.29191	0.00615257	up	18	18	2	1	0	0
StLNC2243	1.50887	0.497301	no change	1	18	5	8	0	0
StLNC2245	-1.25094	0.034913	down	18	11	25	51	54	21
StLNC2248	4.62582	0.231649	no change	41	0	0	2	0	0
StLNC2249	-0.291779	0.81312	no change	7	19	18	3	7	31
StLNC2250	0.656144	0.354678	no change	18	20	20	10	10	14
StLNC2251	1.34053	0.279677	no change	26	5	7	2	14	3
StLNC2252	0.0367509	0.954826	no change	29	19	57	20	36	34
StLNC2253	1.54784	0.516967	no change	38	60	0	33	5	0
StLNC2254	2.20965	0.445342	no change	3	20	0	0	0	4
StLNC2255	-0.350756	0.631137	no change	62	80	98	47	89	130
StLNC2257	1.79818	0.0998939	no change	202	196	66	34	17	71
StLNC2258	-1.50906	0.2626	no change	2	0	10	4	17	8
StLNC2261	-0.874977	0.695442	no change	3	6	0	15	0	2
StLNC2265	-0.497028	0.524505	no change	6	3	10	9	10	6
StLNC2266	1.07897	0.363606	no change	7	5	11	3	9	0
StLNC2274	0.565952	0.708473	no change	0	5	22	8	4	2
StLNC2275	11.1603	9.27e-16	up	921	576	1069	1	0	0
StLNC2278	-1.01876	0.171433	no change	37	36	21	91	88	29
StLNC2279	-0.24911	0.753801	no change	6	11	21	19	20	4
StLNC2281	-0.0706488	0.980791	no change	7	0	12	0	0	13
StLNC2283	7.74487	1.14e-05	up	14	73	37	0	0	0
StLNC2284	0.288938	0.72136	no change	9	11	12	12	5	7
StLNC2285	-1.63249	0.00145004	down	13	10	21	46	60	26
StLNC2288	-1.35386	0.275036	no change	8	0	15	17	19	15
StLNC2289	-5.36832	0.170787	no change	0	0	0	0	0	16
StLNC2290	-1.03341	0.628055	no change	0	8	4	5	0	13
StLNC2291	-1.03768	0.539979	no change	49	66	87	212	236	0
StLNC2292	0.275184	0.637983	no change	116	194	134	96	134	122
StLNC2293	-8.02682	0.0109111	down	0	0	0	0	93	52
StLNC2296	-1.42425	0.452092	no change	0	1	4	6	6	0
StLNC2297	-0.0857396	0.889496	no change	5683	3788	3633	3485	7388	3958
StLNC2299	-1.60987	0.589718	no change	6	0	5	32	0	0
StLNC2300	-1.89989	0.390036	no change	2	12	0	20	49	0
StLNC2301	-1.16931	0.704978	no change	0	30	0	0	24	39
StLNC2302	-0.892367	0.813047	no change	0	0	13	16	0	0
StLNC2303	-4.82485	0.218993	no change	0	0	0	0	0	11
StLNC2305	1.55927	0.156321	no change	21	10	81	2	16	13
StLNC2306	-1.74677	0.644305	no change	5	0	0	20	0	0
StLNC2307	0.0419419	0.946663	no change	4419	3425	2709	2676	6194	2481
StLNC2311	-5.60602	0.152423	no change	0	0	0	25	0	0
StLNC2312	3.2589	0.0641538	no change	9	26	15	0	0	4
StLNC2313	2.78652	0.112133	no change	12	7	30	6	0	0
StLNC2314	2.08553	0.227582	no change	9	1	4	1	0	2
StLNC2315	-4.96224	0.205961	no change	0	0	0	16	0	0
StLNC2316	-0.307328	0.857111	no change	0	71	92	79	107	8
StLNC2319	0.177159	0.922343	no change	0	3	7	4	4	0
StLNC2321	-6.59509	0.0316169	down	0	0	0	28	31	0
StLNC2323	1.30181	0.540912	no change	18	25	0	12	10	0
StLNC2324	-0.994462	0.192706	no change	4	4	6	7	13	7
StLNC2327	1.41411	0.473516	no change	8	5	14	0	0	7
StLNC2330	1.57101	0.594941	no change	2	0	44	0	15	0
StLNC2331	0.231151	0.724199	no change	8	8	15	8	11	6
StLNC2332	-0.26515	0.77733	no change	6	3	18	10	18	3
StLNC2334	-2.55544	0.379573	no change	0	10	0	41	0	14
StLNC2336	3.09372	0.154035	no change	0	2	20	1	1	0
StLNC2339	7.08358	0.053988	no change	60	0	1	0	0	0
StLNC2341	-0.631487	0.748774	no change	3	4	79	25	0	51
StLNC2342	0.0614725	0.964024	no change	16	16	18	22	33	0
StLNC2344	0.0205695	0.969404	no change	53	136	179	125	155	62
StLNC2345	6.22142	0.11186	no change	0	0	61	0	0	0
StLNC2346	5.82532	5.01e-16	up	436	1899	2036	25	35	13
StLNC2347	-0.448133	0.719644	no change	1	2	12	3	14	2
StLNC2350	-1.16572	0.0508399	no change	35	18	54	68	134	40
StLNC2352	6.04599	0.122411	no change	0	0	54	0	0	0
StLNC2354	-5.23188	0.119988	no change	0	0	0	14	0	4
StLNC2358	3.3462	2.67e-06	up	80	72	190	11	6	11
StLNC2359	10.3336	4.44e-13	up	258	185	297	0	0	0
StLNC2360	0.364241	0.773397	no change	1	4	6	1	2	4
StLNC2361	0.429869	0.868692	no change	136	199	0	0	125	139
StLNC2362	2.38496	0.0524712	no change	8	8	7	1	4	0
StLNC2363	1.61489	0.416316	no change	0	20	36	8	9	0
StLNC2364	6.29053	0.107907	no change	0	0	64	0	0	0
StLNC2365	7.32819	0.0221235	up	38	40	0	0	0	0
StLNC2366	0.418062	0.890262	no change	10	16	0	0	0	16
StLNC2367	-5.36832	0.170787	no change	0	0	0	0	0	16
StLNC2369	-1.33363	0.594778	no change	92	0	94	280	223	0
StLNC2370	-0.96795	0.106429	no change	13	12	16	29	24	22
StLNC2371	4.86379	0.0074739	up	5	5	7	0	0	0
StLNC2373	0.908244	0.810345	no change	0	0	20	0	10	0
StLNC2376	-4.66272	0.235131	no change	0	0	0	13	0	0
StLNC2377	5.84152	0.000651597	up	5	14	16	0	0	0
StLNC2383	-0.373679	0.549579	no change	6	13	18	16	17	11
StLNC2384	-0.894863	0.575861	no change	1	8	7	0	22	8
StLNC2385	4.48888	6.36e-05	up	26	19	22	1	1	1
StLNC2387	-2.26715	0.108333	no change	3	2	0	5	7	12
StLNC2388	0.0230157	0.964252	no change	16	29	50	23	43	21
StLNC2392	3.06148	0.17019	no change	1	946	423	1	210	1
StLNC2393	0.913052	0.786386	no change	117	65	0	110	0	0
StLNC2396	-1.36022	0.240102	no change	0	4	7	11	8	5
StLNC2397	4.07579	0.0104751	up	4	7	61	0	1	2
StLNC2398	-2.37348	8.61e-06	down	17	19	22	63	148	85
StLNC2399	0.229655	0.612729	no change	55	47	107	52	61	48
StLNC2401	-2.66691	0.0962681	no change	0	0	6	11	16	4
StLNC2402	0.715946	0.41262	no change	66	49	62	19	99	11
StLNC2403	-5.49191	0.0808599	no change	0	0	0	14	13	0
StLNC2405	4.88055	0.213449	no change	0	0	24	0	0	0
StLNC2407	1.52245	0.0729496	no change	9	6	18	3	6	2
StLNC2408	0.888402	0.761166	no change	21	0	9	0	24	0
StLNC2409	-0.382247	0.629283	no change	36	17	53	22	43	55
StLNC2410	11.6857	3.21e-11	up	386	2583	545	0	1	0
StLNC2411	-2.89523	0.0443628	down	3	0	1	8	25	3
StLNC2413	0.192851	0.680448	no change	38	31	73	42	53	23
StLNC2415	-1.68836	0.00533824	down	10	8	27	50	60	24
StLNC2417	-4.35309	0.0733623	no change	0	0	2	15	23	0
StLNC2419	8.05778	0.00433354	up	67	339	0	0	2	0
StLNC2420	-0.439045	0.907608	no change	0	8	0	11	0	0
StLNC2422	-0.560035	0.628971	no change	12	50	61	53	139	4
StLNC2424	5.27814	0.105398	no change	0	16	7	0	0	0
StLNC2425	-4.68643	0.232719	no change	0	0	0	0	0	10
StLNC2426	0.579318	0.514623	no change	25	34	102	31	70	6
StLNC2428	-2.48948	0.313888	no change	0	0	4	8	11	0
StLNC2430	0.0266765	0.953551	no change	135	125	161	118	148	126
StLNC2431	-1.39506	0.0778415	no change	2	7	6	14	14	9
StLNC2433	7.22005	0.0500965	no change	66	0	1	0	0	0
StLNC2434	1.88447	0.16909	no change	16	39	32	0	23	4
StLNC2438	2.86844	0.085184	no change	3	4	10	2	0	0
StLNC2441	0.851455	0.634891	no change	55	189	246	207	37	0
StLNC2442	1.11658	0.133453	no change	22	24	38	12	26	3
StLNC2443	-0.113563	0.936668	no change	3	8	14	0	12	11
StLNC2447	1.69166	0.519483	no change	0	9	4	0	5	0
StLNC2448	-6.21003	0.112583	no change	0	0	0	38	0	0
StLNC2450	-0.281775	0.790549	no change	286	161	275	129	926	48
StLNC2451	-2.97273	0.00520062	down	0	6	6	21	29	30
StLNC2452	-5.60912	0.0102698	down	0	0	0	19	3	3
StLNC2454	11.7944	6.41e-12	up	168	1087	918	0	0	0
StLNC2455	-4.6523	0.165027	no change	0	0	0	0	9	5
StLNC2456	0.454706	0.804195	no change	0	5	10	5	5	0
StLNC2457	0.195203	0.818516	no change	3	17	20	8	18	7
StLNC2458	0.308753	0.739643	no change	7	8	9	4	4	9
StLNC2462	-0.986661	0.00303126	no change	76	97	150	182	317	127
StLNC2463	3.8872	0.0587403	no change	2	1	18	1	0	0
StLNC2464	-5.41186	0.0924067	no change	0	0	0	0	18	7
StLNC2465	5.39204	0.00140235	up	6	8	11	0	0	0
StLNC2466	-1.12431	0.347271	no change	6	0	7	8	12	7
StLNC2469	-2.09844	0.0898746	no change	6	0	3	10	23	9
StLNC2470	0.338254	0.659082	no change	69	44	71	72	69	13
StLNC2471	0.343128	0.786772	no change	7	6	5	8	8	0
StLNC2475	-2.57364	0.195267	no change	4	0	44	145	80	1
StLNC2476	-1.84869	0.56885	no change	42	0	0	0	61	105
StLNC2477	-0.560822	0.551448	no change	3	6	7	12	9	2
StLNC2480	-1.01584	0.505322	no change	30	1	17	3	99	19
StLNC2482	-0.642556	0.514218	no change	3	2	4	5	7	2
StLNC2484	-1.06169	0.428436	no change	2	0	10	4	9	7
StLNC2487	3.41957	0.0591068	no change	3	58	128	13	1	0
StLNC2488	-5.67262	0.0721802	no change	0	0	0	8	26	0
StLNC2489	0.318441	0.639411	no change	723	528	393	374	862	272
StLNC2490	5.65041	0.0918629	no change	0	24	4	0	0	0
StLNC2493	4.61706	0.239593	no change	0	13	0	0	0	0
StLNC2494	-0.647757	0.754654	no change	0	10	4	0	8	11
StLNC2496	5.73616	0.000531473	up	6	10	17	0	0	0
StLNC2501	2.55408	0.123076	no change	5	2	71	5	6	0
StLNC2503	-2.00965	0.184432	no change	34	1	10	60	12	95
StLNC2504	-0.468716	0.654051	no change	2	13	25	8	39	7
StLNC2505	4.67577	0.0172809	up	13	1	39	0	2	0
StLNC2507	5.36354	0.0919756	no change	0	14	12	0	0	0
StLNC2508	1.17925	0.159321	no change	5	10	17	6	5	2
StLNC2511	0.347452	0.861233	no change	5	8	0	6	7	0
StLNC2514	-0.937503	0.541026	no change	5	4	0	5	3	9
StLNC2515	5.15996	0.170765	no change	0	0	57	1	0	0
StLNC2517	1.69044	0.424432	no change	30	0	17	4	15	0
StLNC2520	5.56642	0.00749908	up	0	429	357	1	2	9
StLNC2521	1.35013	0.496841	no change	65	0	7	2	34	5
StLNC2523	-0.377324	0.662612	no change	10	6	22	23	20	4
StLNC2525	2.45278	0.105686	no change	13	39	2	1	11	1
StLNC2527	0.233265	0.752428	no change	10	18	23	19	20	4
StLNC2528	-2.38101	0.147717	no change	2	0	1	3	15	1
StLNC2530	-5.14549	0.18948	no change	0	0	0	0	26	0
StLNC2531	7.02175	0.0725498	no change	58	0	0	0	0	0
StLNC2533	-1.14391	0.550044	no change	0	5	3	5	15	0
StLNC2534	1.64286	0.0272315	up	22	19	30	12	7	3
StLNC2535	1.49845	0.128372	no change	44	22	15	4	20	9
StLNC2536	-0.216748	0.777811	no change	538	389	213	322	831	357
StLNC2538	0.616848	0.246012	no change	20	28	57	15	31	17
StLNC2539	-4.68643	0.232719	no change	0	0	0	0	0	10
StLNC2542	-5.35098	0.17219	no change	0	0	0	0	30	0
StLNC2547	1.66334	0.394979	no change	3	15	23	0	15	0
StLNC2548	5.96322	0.0569146	no change	0	22	17	0	0	0
StLNC2549	-6.20971	0.000182234	down	0	0	2	40	100	7
StLNC2550	5.0397	0.117985	no change	0	7	16	0	0	0
StLNC2551	0.167734	0.84156	no change	6	4	16	5	13	4
StLNC2555	-1.16402	0.00301361	down	64	76	141	211	288	107
StLNC2556	-0.544836	0.841769	no change	0	0	11	3	11	0
StLNC2558	-1.64023	0.389982	no change	0	3	0	2	3	4
StLNC2559	-0.430576	0.408445	no change	23	24	38	37	62	17
StLNC2561	0.477876	0.812222	no change	14	0	18	10	15	0
StLNC2562	-1.74858	0.0469706	down	5	24	59	116	92	41
StLNC2563	6.12348	0.0022362	up	93	138	7	0	0	3
StLNC2564	-0.87351	0.717499	no change	0	11	1	19	0	2
StLNC2565	1.22719	0.531512	no change	0	14	17	0	8	4
StLNC2566	4.5456	0.247062	no change	0	0	19	0	0	0
StLNC2567	1.21681	0.438192	no change	6	4	3	0	1	4
StLNC2569	-0.632415	0.654023	no change	7	56	61	5	24	107
StLNC2573	1.63629	0.00790571	up	30	73	65	21	23	9
StLNC2576	-0.826248	0.20237	no change	12	32	68	55	93	33
StLNC2578	7.96908	2.38e-09	up	191	141	232	0	0	2
StLNC2581	-4.68643	0.232719	no change	0	0	0	0	0	10
StLNC2582	0.795659	0.698065	no change	11	0	8	0	4	6
StLNC2584	2.79765	0.0497866	up	11	40	37	1	14	0
StLNC2585	2.48999	0.247144	no change	16	2	2	4	0	0
StLNC2586	0.492294	0.624198	no change	9	5	13	4	3	9
StLNC2587	-1.27411	0.268751	no change	3	4	59	38	65	23
StLNC2588	0.00962881	0.997966	no change	0	0	16	0	15	0
StLNC2589	0.851065	0.785171	no change	0	0	123	26	27	0
StLNC2590	-1.28682	0.106612	no change	4	6	5	13	20	5
StLNC2591	-1.7762	0.559784	no change	0	23	0	0	29	45
StLNC2592	5.08705	0.194465	no change	0	18	0	0	0	0
StLNC2593	-1.10782	0.392236	no change	8	40	7	19	13	68
StLNC2594	2.47463	0.124159	no change	38	273	246	25	89	0
StLNC2595	-0.28876	0.712283	no change	40	23	49	15	80	42
StLNC2596	5.93278	0.000517619	up	5	14	19	0	0	0
StLNC2597	-1.94393	0.149608	no change	5	0	6	7	9	19
StLNC2599	-0.327285	0.857481	no change	0	4	3	4	5	0
StLNC2600	2.04065	0.596717	no change	0	0	16	0	0	2
StLNC2602	0.110037	0.762504	no change	90	108	211	100	150	96
StLNC2603	1.49691	0.481618	no change	5	6	0	3	0	1
StLNC2604	-0.819393	0.507557	no change	4	0	10	7	8	6
StLNC2605	0.595415	0.757782	no change	0	7	12	0	5	5
StLNC2606	-1.64981	0.0814838	no change	18	18	108	203	144	35
StLNC2607	-0.856908	0.616039	no change	18	2	12	43	20	0
StLNC2608	1.29777	0.0168587	up	27	29	54	11	25	8
StLNC2611	-0.603457	0.18312	no change	26	25	34	44	58	26
StLNC2612	1.86337	0.151045	no change	2	6	15	2	4	0
StLNC2613	0.731455	0.449551	no change	6	18	39	14	20	2
StLNC2614	0.165525	0.90681	no change	5	3	3	0	8	3
StLNC2615	-0.668926	0.761061	no change	1	3	4	11	0	0
StLNC2616	0.374205	0.334895	no change	213	237	377	171	225	187
StLNC2618	5.21019	0.00442269	up	4	5	15	0	0	0
StLNC2620	1.19088	0.430817	no change	54	10	59	26	34	0
StLNC2621	-0.523618	0.438935	no change	5	17	27	19	30	15
StLNC2624	4.79272	0.0029929	up	17	55	33	0	0	3
StLNC2625	0.394556	0.916024	no change	0	37	0	0	41	0
StLNC2628	0.167093	0.640687	no change	88	100	176	111	116	73
StLNC2629	-1.79019	0.00903439	down	37	44	27	132	105	123
StLNC2630	-0.284086	0.538073	no change	62	98	149	126	110	98
StLNC2631	0.0215199	0.962577	no change	99	138	132	91	203	81
StLNC2632	-0.131293	0.803772	no change	20	25	32	32	39	13
StLNC2633	-0.395327	0.787208	no change	108	58	2	23	183	75
StLNC2634	0.167858	0.775868	no change	20	24	58	21	29	28
StLNC2635	6.38661	7.98e-05	up	15	9	27	0	0	0
StLNC2637	1.03959	0.625745	no change	0	34	35	21	10	0
StLNC2638	-0.0826809	0.982558	no change	0	0	14	0	14	0
StLNC2639	1.69598	0.0867964	no change	26	43	70	21	21	1
StLNC2640	-3.98091	0.0240336	down	0	4	0	8	18	32
StLNC2641	2.07526	0.285043	no change	137	138	114	0	2	67
StLNC2642	0.0184176	0.974558	no change	12	14	16	13	19	9
StLNC2643	-0.0673032	0.873346	no change	34	42	79	43	62	43
StLNC2646	-0.731801	0.791053	no change	0	6	0	3	10	0
StLNC2647	2.21304	0.0212008	up	5	10	16	2	2	2
StLNC2649	0.828864	0.185197	no change	69	50	71	20	47	37
StLNC2650	-2.18181	0.00357488	down	44	14	54	126	330	82
StLNC2651	1.65964	0.000321598	up	313	285	576	90	128	115
StLNC2653	0.5768	0.770378	no change	0	5	5	0	6	1
StLNC2654	-0.485163	0.573453	no change	25	20	34	60	46	7
StLNC2655	0.715302	0.850796	no change	0	0	14	0	8	0
StLNC2657	6.56927	0.000302486	up	7	10	49	0	0	0
StLNC2659	-1.48198	0.288637	no change	0	2	2	2	7	2
StLNC2660	-0.906365	0.748039	no change	0	0	17	17	6	0
StLNC2662	-0.429811	0.876511	no change	0	7	0	6	5	0
StLNC2663	12.2241	0.000459201	up	1218	0	1682	0	0	0
StLNC2665	-7.19379	2.87e-05	down	0	0	0	35	44	7
StLNC2666	-0.731687	0.787278	no change	0	0	13	6	12	0
StLNC2667	0.525548	0.386664	no change	80	89	246	77	71	88
StLNC2668	-1.38047	0.233543	no change	29	4	5	47	56	17
StLNC2670	1.90926	0.178591	no change	4	2	74	8	6	2
StLNC2672	-4.01051	0.0122356	down	0	0	6	8	45	23
StLNC2673	-0.959456	0.741536	no change	0	4	2	0	0	8
StLNC2675	-4.82485	0.218993	no change	0	0	0	0	0	11
StLNC2676	-1.39784	0.13531	no change	2	2	8	5	14	9
StLNC2677	-4.42917	0.00484199	down	0	0	10	49	53	49
StLNC2678	4.63535	7.71e-05	up	24	46	28	3	1	0
StLNC2679	-2.76818	0.348186	no change	0	3	4	39	0	0
StLNC2680	-0.950648	0.526815	no change	3	10	0	4	13	10
StLNC2681	-0.506084	0.316248	no change	48	45	50	79	92	37
StLNC2682	-2.36886	0.255066	no change	0	1	9	25	17	0
StLNC2684	-0.762121	0.557873	no change	0	7	8	3	13	7
StLNC2685	0.196359	0.947993	no change	14	0	0	2	18	0
StLNC2687	0.995466	0.709119	no change	6	208	227	0	265	0
StLNC2689	1.04665	0.371145	no change	12	16	19	10	15	0
StLNC2690	0.667319	0.237098	no change	37	47	79	41	25	25
StLNC2691	0.0424568	0.944094	no change	17	21	24	22	32	8
StLNC2692	2.34989	0.209354	no change	2	10	9	0	0	3
StLNC2695	-0.399241	0.888905	no change	0	0	15	0	15	2
StLNC2696	-6.299	0.107486	no change	0	0	0	0	58	0
StLNC2699	-5.7695	0.140701	no change	0	0	0	28	0	0
StLNC2700	-5.19967	0.1848	no change	0	0	0	0	27	0
StLNC2701	-0.596434	0.417621	no change	11	23	13	29	36	10
StLNC2703	7.48925	3.27e-07	up	24	27	61	0	0	0
StLNC2706	3.23007	0.223977	no change	0	27	50	0	9	0
StLNC2708	-0.172984	0.918841	no change	60	79	1	47	5	92
StLNC2709	-0.711786	0.206663	no change	191	337	326	573	672	186
StLNC2710	-3.1144	0.0426293	down	0	0	3	5	14	4
StLNC2711	0.706882	0.745696	no change	0	1	17	0	7	2
StLNC2712	1.64338	0.40553	no change	7	15	13	0	0	8
StLNC2713	-0.84993	0.659287	no change	5	0	5	11	8	0
StLNC2714	1.55006	0.308288	no change	0	10	13	1	4	2
StLNC2716	-2.29952	0.389277	no change	0	4	0	0	17	6
StLNC2718	0.305667	0.811492	no change	9	121	11	20	72	33
StLNC2721	1.46358	0.473772	no change	7	8	43	0	23	0
StLNC2722	5.80126	0.0276404	up	1	1	42	0	0	0
StLNC2723	1.27288	0.647014	no change	7	0	11	0	0	5
StLNC2724	-1.42004	0.53417	no change	0	0	100	79	50	47
StLNC2725	1.86586	0.0742264	no change	9	8	14	3	6	0
StLNC2726	7.5042	0.000280963	up	43	42	5	0	0	0
StLNC2727	0.642744	0.181889	no change	39	42	83	40	34	22
StLNC2730	0.341428	0.911022	no change	0	10	50	34	0	0
StLNC2731	7.52668	2.22e-06	up	74	82	32	1	0	0
StLNC2732	1.81856	0.0565078	no change	8	7	18	2	2	4
StLNC2733	-0.969874	0.474792	no change	1	1	17	11	19	2
StLNC2734	2.56956	0.309344	no change	0	9	19	0	5	0
StLNC2735	-1.4232	0.0233827	down	22	12	47	69	64	56
StLNC2736	-1.47806	0.0902673	no change	9	11	24	68	35	10
StLNC2738	0.504468	0.249078	no change	82	105	184	88	78	67
StLNC2739	1.11211	0.515943	no change	13	44	5	4	36	0
StLNC2741	-0.70222	0.293661	no change	7	8	18	13	17	17
StLNC2742	1.79461	0.0119803	up	24	21	24	6	6	7
StLNC2743	-2.98442	0.105383	no change	0	0	15	48	24	12
StLNC2745	0.794736	0.411189	no change	8	3	11	6	4	2
StLNC2746	-5.65234	0.149028	no change	0	0	0	0	37	0
StLNC2747	1.57908	0.181848	no change	10	8	21	0	7	5
StLNC2748	0.0249101	0.974043	no change	49	71	82	86	110	14
StLNC2749	-0.580218	0.850838	no change	0	35	0	42	16	0
StLNC2750	0.646955	0.471881	no change	50	13	37	19	46	8
StLNC2751	5.39667	0.000346643	up	15	41	99	3	0	0
StLNC2753	-1.4618	0.435604	no change	137	35	56	286	529	0
StLNC2754	1.92359	0.114736	no change	22	24	39	0	12	9
StLNC2756	0.841545	0.399882	no change	5	6	6	5	2	2
StLNC2757	2.02889	0.102064	no change	34	43	75	20	18	0
StLNC2760	-2.2361	0.10994	no change	9	1	12	23	96	2
StLNC2761	5.21142	0.106875	no change	10	0	12	0	0	0
StLNC2764	-2.81646	0.000794981	down	2	5	5	39	32	11
StLNC2765	-0.560094	0.734578	no change	33	10	3	70	5	2
StLNC2766	4.64288	0.00477485	up	110	91	4	4	7	0
StLNC2768	1.57497	0.258038	no change	10	113	40	1	38	18
StLNC2769	8.96911	0.00087373	up	19	242	1	0	0	0
StLNC2773	-1.62615	0.27243	no change	34	135	1	251	239	101
StLNC2778	-1.04878	0.277261	no change	24	23	57	19	46	102
StLNC2779	0.101423	0.978488	no change	13	0	0	0	0	11
StLNC2780	0.572833	0.478269	no change	1687	3815	2966	790	4768	885
StLNC2781	0.251987	0.927847	no change	0	9	9	0	18	0
StLNC2783	1.06219	0.0667779	no change	61	146	176	43	61	58
StLNC2784	-2.9197	6.62e-05	down	7	14	16	137	101	33
StLNC2785	-2.27819	0.164443	no change	0	0	5	4	12	4
StLNC2787	-0.695895	0.807764	no change	0	0	20	4	25	0
StLNC2788	-4.83059	0.173058	no change	0	0	0	0	2	10
StLNC2790	-0.896055	0.151486	no change	11	13	28	27	56	13
StLNC2793	0.641646	0.779389	no change	4	21	3	18	0	0
StLNC2794	-0.245851	0.716987	no change	11	13	20	8	24	17
StLNC2797	-0.327215	0.604393	no change	11	16	20	25	25	8
StLNC2803	-1.26253	0.219387	no change	7	8	32	48	9	28
StLNC2804	0.459654	0.67662	no change	2	3	12	5	5	1
StLNC2805	-5.61726	0.151594	no change	0	0	0	0	0	19
StLNC2809	-0.312538	0.820124	no change	0	16	31	15	14	16
StLNC2811	-1.23802	0.642797	no change	0	0	11	9	12	0
StLNC2814	0.341938	0.84943	no change	19	33	2	0	46	10
StLNC2815	2.99367	0.151499	no change	2	10	1	0	2	0
StLNC2816	4.57279	0.0159822	up	4	4	6	0	0	0
StLNC2817	12.089	9.9e-20	up	4094	1808	3032	1	0	1
StLNC2820	0.413712	0.911832	no change	47	0	0	0	0	32
StLNC2821	0.178239	0.910715	no change	0	35	16	24	7	9
StLNC2822	-0.933495	0.0153876	no change	289	349	513	832	943	374
StLNC2823	5.54056	0.157213	no change	0	0	38	0	0	0
StLNC2825	1.61438	0.0521583	no change	17	19	64	15	6	6
StLNC2826	-0.101065	0.937082	no change	2	1	8	2	2	5
StLNC2827	7.05037	0.0101948	up	57	2	1	0	0	0
StLNC2829	-4.68643	0.232719	no change	0	0	0	0	0	10
StLNC2830	5.24798	0.180561	no change	0	0	31	0	0	0
StLNC2832	5.96374	0.12762	no change	0	0	51	0	0	0
StLNC2833	-1.33773	0.0178918	down	11	9	18	34	44	16
StLNC2834	4.68801	4.89e-06	up	539	840	1320	14	10	54
StLNC2835	1.28425	0.735545	no change	0	12	0	5	0	0
StLNC2836	-0.712869	0.507352	no change	5	1	23	10	18	11
StLNC2838	-6.02414	0.0765125	no change	0	0	0	2	45	0
StLNC2839	-0.207683	0.725608	no change	10	14	23	18	27	8
StLNC2840	-5.28445	0.0971247	no change	0	0	0	13	10	0
StLNC2841	0.494758	0.629803	no change	7	3	9	2	4	6
StLNC2842	-7.42285	5.07e-07	down	0	0	0	26	36	28
StLNC2843	-1.07729	0.153717	no change	22	6	23	36	37	29
StLNC2844	-0.72842	0.547807	no change	53	4	107	149	56	31
StLNC2846	-5.19967	0.1848	no change	0	0	0	0	27	0
StLNC2848	-1.37951	0.11625	no change	117	72	62	224	516	59
StLNC2852	-0.437168	0.377571	no change	58	82	94	104	177	47
StLNC2854	1.45699	0.0403125	up	18	19	39	7	18	3
StLNC2856	0.370754	0.909939	no change	0	39	0	0	42	1
StLNC2857	-2.5375	0.512639	no change	0	0	3	0	0	9

## Sheet: mht3_vs_mht0
LncRNA	log2FC	pvalue	regulations	mht3_1	mht3_2	mht3_3	mht0_1	mht0_2	mht0_3
StLNC0001	-0.075852	0.961496	no change	13	14	9	0	4	26
StLNC0003	0.940754	0.000162713	no change	498	897	1299	304	264	319
StLNC0004	-4.06917	0.133721	no change	0	6	0	35	29	0
StLNC0005	-0.373363	0.719548	no change	25	29	23	27	38	4
StLNC0006	-0.228553	0.719754	no change	58	140	199	127	104	48
StLNC0008	-5.22872	0.182892	no change	0	0	0	0	13	0
StLNC0010	0.109584	0.955202	no change	0	12	17	8	6	0
StLNC0011	0.641506	0.368963	no change	89	474	459	89	178	120
StLNC0012	0.515577	0.530935	no change	43	31	97	25	39	10
StLNC0014	-0.834464	0.166902	no change	10	15	25	13	25	18
StLNC0016	-0.788305	0.730379	no change	4	21	0	0	5	28
StLNC0017	1.5546	0.477111	no change	1	6	43	0	0	9
StLNC0018	1.77533	0.00392632	up	85	123	140	14	34	19
StLNC0020	-0.537182	0.286841	no change	51	74	63	73	57	58
StLNC0021	-0.437844	0.66177	no change	50	55	17	22	72	33
StLNC0022	5.12095	0.121214	no change	5	0	31	0	0	0
StLNC0023	1.54965	0.680008	no change	0	48	0	0	10	0
StLNC0025	0.215193	0.774815	no change	6	20	19	9	10	5
StLNC0026	2.5086	0.149561	no change	2	10	6	2	0	0
StLNC0027	0.035186	0.934791	no change	1075	1148	1974	1158	718	831
StLNC0029	-0.38259	0.481941	no change	25	29	69	42	32	25
StLNC0030	4.77462	0.000258648	up	31	43	41	0	0	3
StLNC0032	1.61576	0.586124	no change	0	1	35	0	5	0
StLNC0033	-1.10635	0.355822	no change	0	5	7	4	3	8
StLNC0034	2.23329	0.190762	no change	7	7	26	5	0	0
StLNC0037	3.6769	0.204728	no change	75	0	38	0	7	0
StLNC0038	0.584715	0.841981	no change	0	23	46	0	0	26
StLNC0040	-0.250803	0.650222	no change	26	38	55	44	25	22
StLNC0042	-0.483379	0.270721	no change	62	82	97	85	76	64
StLNC0044	-1.85191	0.531181	no change	11	0	0	0	18	24
StLNC0045	6.18323	0.113932	no change	38	0	0	0	0	0
StLNC0048	-3.71419	0.0495271	down	0	1	2	1	1	22
StLNC0049	5.73614	0.00191212	up	550	1626	2580	51	1	0
StLNC0053	0.122897	0.895113	no change	25	32	31	35	15	5
StLNC0055	0.470441	0.301493	no change	54	122	150	61	46	40
StLNC0056	0.6435	0.709651	no change	123	41	57	0	75	39
StLNC0059	2.49381	0.365639	no change	6	25	0	4	0	0
StLNC0061	-0.0653636	0.943209	no change	7	92	72	32	25	50
StLNC0062	-1.63424	3.92e-05	down	49	102	173	196	162	261
StLNC0064	-0.672077	0.320631	no change	13	30	53	36	38	16
StLNC0066	-5.92148	0.13075	no change	0	0	0	0	21	0
StLNC0067	0.388857	0.678868	no change	5	4	9	4	2	3
StLNC0071	3.0675	6.31e-06	up	34	76	182	7	7	6
StLNC0073	1.78052	0.356253	no change	0	9	16	0	1	3
StLNC0076	1.45431	0.590183	no change	0	7	29	0	0	7
StLNC0078	0.42023	0.51862	no change	19	94	104	29	36	31
StLNC0079	0.414084	0.310276	no change	55	81	154	42	36	59
StLNC0080	-0.568251	0.690326	no change	6	0	12	9	5	3
StLNC0081	0.112498	0.881301	no change	4	12	18	8	6	5
StLNC0082	-0.0766119	0.959513	no change	0	42	48	31	9	12
StLNC0083	0.183689	0.825817	no change	5	7	9	4	5	3
StLNC0084	1.06885	0.424587	no change	150	10	227	29	9	96
StLNC0085	-0.6307	0.748416	no change	0	11	6	9	6	0
StLNC0086	0.375238	0.891149	no change	0	11	13	0	0	11
StLNC0090	1.39322	0.614554	no change	7	11	0	0	0	6
StLNC0091	-0.171888	0.90889	no change	12	9	45	0	15	30
StLNC0092	-1.31827	0.661338	no change	0	0	50	32	22	0
StLNC0093	1.3046	0.462421	no change	4	5	14	0	0	6
StLNC0094	-0.803326	0.370566	no change	1594	726	530	1426	1289	1478
StLNC0096	-0.260614	0.791553	no change	3	8	6	4	7	2
StLNC0099	5.0231	0.0293123	up	2	22	3	0	0	0
StLNC0100	-0.440254	0.439889	no change	12	34	55	35	22	25
StLNC0101	-0.31021	0.577765	no change	13	18	35	16	12	24
StLNC0104	1.62686	0.411235	no change	11	9	3	6	0	0
StLNC0105	-1.06692	0.602724	no change	7	0	11	9	0	18
StLNC0106	4.94033	0.134697	no change	11	0	12	0	0	0
StLNC0107	-1.05495	0.428257	no change	11	5	1	6	5	21
StLNC0108	0.320321	0.745003	no change	5	5	31	5	9	4
StLNC0109	1.56396	0.394621	no change	6	2	8	0	0	4
StLNC0110	-0.401157	0.809947	no change	47	29	98	109	0	42
StLNC0111	0.699841	0.70578	no change	0	2	38	1	2	9
StLNC0114	-1.07421	0.20853	no change	3	8	16	7	18	8
StLNC0115	0.707858	0.810587	no change	0	33	38	0	22	0
StLNC0116	0.0448021	0.920641	no change	27	44	68	33	20	33
StLNC0119	0.651882	0.657713	no change	15	25	7	0	8	15
StLNC0121	-0.193098	0.924094	no change	5	5	0	4	0	6
StLNC0122	-0.69968	0.420763	no change	3	3	10	6	4	6
StLNC0123	-1.34782	0.380146	no change	4	4	2	17	1	1
StLNC0124	0.195548	0.758554	no change	103	105	117	39	59	106
StLNC0125	4.88524	0.158499	no change	3	20	0	0	0	0
StLNC0127	0.0434609	0.946659	no change	108	147	242	43	137	129
StLNC0128	3.53403	0.000220144	up	22	51	30	3	2	1
StLNC0129	0.0979452	0.829347	no change	181	285	397	134	129	267
StLNC0130	-0.885494	0.599325	no change	2	0	13	11	1	3
StLNC0132	-0.308614	0.81192	no change	0	12	12	8	3	6
StLNC0138	-0.869275	0.665509	no change	0	49	65	1	92	13
StLNC0141	-2.72104	0.0585972	no change	6	0	5	28	20	5
StLNC0142	-0.658491	0.628486	no change	1	129	120	59	111	45
StLNC0143	-0.243344	0.894569	no change	0	6	7	3	0	6
StLNC0144	-2.94376	0.183073	no change	0	0	12	36	1	6
StLNC0145	1.87172	0.528471	no change	0	76	16	0	0	17
StLNC0148	-0.120391	0.86102	no change	62	87	117	31	45	120
StLNC0149	0.617408	0.319198	no change	13	26	66	12	13	15
StLNC0151	0.434272	0.435813	no change	345	1120	1209	285	336	616
StLNC0153	0.50238	0.71876	no change	4	21	25	11	9	0
StLNC0154	-0.974476	0.185142	no change	15	35	23	33	44	17
StLNC0160	-0.941339	0.137414	no change	7	11	17	9	15	19
StLNC0161	-1.1648	0.08271	no change	11	44	23	36	39	39
StLNC0162	0.168555	0.897323	no change	3	12	9	6	0	8
StLNC0165	-0.802925	0.0999427	no change	393	410	857	401	676	795
StLNC0168	-0.906784	0.407899	no change	14	31	51	13	8	95
StLNC0169	-0.509454	0.699904	no change	0	13	19	13	4	8
StLNC0170	-6.43648	0.100164	no change	0	0	0	0	30	0
StLNC0171	-2.82654	0.332094	no change	2	0	4	0	0	30
StLNC0172	6.81775	0.0137341	up	13	0	240	0	0	1
StLNC0173	0.311279	0.870617	no change	0	13	15	5	0	8
StLNC0174	-1.95725	0.32294	no change	3	0	4	8	10	0
StLNC0175	0.686911	0.616016	no change	6	6	21	9	3	0
StLNC0177	0.0724289	0.88333	no change	52	113	85	53	43	64
StLNC0179	0.373317	0.477929	no change	32	53	128	34	23	42
StLNC0181	3.4054	0.0450621	up	22	48	21	6	0	0
StLNC0185	-0.427555	0.67519	no change	7	47	12	26	8	26
StLNC0186	7.03934	2.71e-06	up	16	38	68	0	0	0
StLNC0187	-0.869298	0.326244	no change	13	9	6	16	13	10
StLNC0188	-0.647014	0.248262	no change	23	21	68	30	36	42
StLNC0190	3.18986	0.00805352	up	142	91	1162	57	14	8
StLNC0191	4.25079	0.0797968	no change	0	18	19	1	0	0
StLNC0192	8.9835	4.14e-09	up	59	221	160	0	0	0
StLNC0193	-0.142928	0.942156	no change	0	5	19	4	0	10
StLNC0194	-0.667623	0.349232	no change	622	237	776	553	662	621
StLNC0195	-0.378711	0.577673	no change	9	18	20	19	12	8
StLNC0197	-0.120665	0.894366	no change	10	7	11	11	7	3
StLNC0198	-1.05892	0.73259	no change	0	31	14	55	0	0
StLNC0201	0.684399	0.533496	no change	19	3	46	10	11	5
StLNC0202	1.85369	0.0770387	no change	98	111	28	24	20	7
StLNC0203	-1.26798	0.560357	no change	0	9	32	0	9	43
StLNC0205	0.0706034	0.946245	no change	103	88	157	9	79	143
StLNC0206	-0.350258	0.827728	no change	5	38	62	38	0	39
StLNC0207	0.382495	0.666673	no change	16	92	162	67	23	25
StLNC0211	0.299712	0.808809	no change	8	10	17	9	0	10
StLNC0212	-1.05242	0.0281982	down	53	53	99	73	78	132
StLNC0213	-0.539552	0.559899	no change	6	33	53	17	11	51
StLNC0214	-1.91075	0.0662713	no change	2	6	11	5	27	9
StLNC0215	-0.927458	0.272235	no change	4	6	6	9	7	4
StLNC0216	4.28801	0.0157518	up	11	12	4	0	0	1
StLNC0217	-1.27796	0.572472	no change	0	34	49	67	37	0
StLNC0220	1.63796	0.151721	no change	91	218	29	8	43	29
StLNC0221	-3.1136	0.0083647	down	0	9	29	57	50	62
StLNC0222	0.415886	0.832183	no change	717	362	1989	530	813	0
StLNC0224	-1.7696	0.353248	no change	0	3	4	0	3	11
StLNC0227	5.64548	0.0940316	no change	5	34	0	0	0	0
StLNC0229	0.488197	0.375788	no change	17	23	47	10	12	17
StLNC0230	-5.66202	0.000221736	down	0	1	0	8	9	21
StLNC0231	1.19141	0.234824	no change	5	7	9	1	3	2
StLNC0236	-5.20227	0.185155	no change	0	0	0	0	0	15
StLNC0238	2.16266	0.0843864	no change	4	10	16	3	1	0
StLNC0241	-0.189285	0.803195	no change	69	88	162	37	44	160
StLNC0242	-5.40104	0.0988904	no change	0	0	0	12	0	4
StLNC0245	-0.580884	0.779101	no change	0	13	22	20	7	0
StLNC0250	1.75316	0.324079	no change	8	8	5	0	0	5
StLNC0251	-0.603339	0.696276	no change	0	38	60	30	7	45
StLNC0252	-0.363395	0.367068	no change	698	1220	1162	875	671	1135
StLNC0253	0.0590873	0.952203	no change	20	29	32	8	5	42
StLNC0254	0.724829	0.401272	no change	326	517	164	211	154	86
StLNC0255	-0.679145	0.540198	no change	20	50	74	90	41	5
StLNC0257	6.08528	0.119806	no change	0	57	0	0	0	0
StLNC0258	-1.76958	0.0535137	no change	13	20	101	76	127	37
StLNC0260	0.925745	0.101839	no change	26	72	138	25	19	29
StLNC0262	-0.764005	0.615845	no change	5	12	9	0	22	6
StLNC0263	1.09248	0.529009	no change	20	7	0	6	2	4
StLNC0265	-1.89578	0.616387	no change	0	7	0	17	0	0
StLNC0266	-0.13978	0.793164	no change	13	22	35	18	11	20
StLNC0267	-4.16761	0.270616	no change	0	0	2	19	0	0
StLNC0268	-0.563102	0.403098	no change	35	38	52	27	26	76
StLNC0269	-0.178705	0.746769	no change	53	78	81	33	51	80
StLNC0272	0.392826	0.755477	no change	6	8	6	6	0	5
StLNC0273	8.97698	3.07e-09	up	134	95	166	0	0	0
StLNC0276	0.527107	0.0381547	no change	18006	32131	41718	12162	12927	15901
StLNC0278	0.546045	0.456204	no change	40	52	59	10	19	43
StLNC0279	-3.18398	0.00561191	down	3	7	5	39	44	4
StLNC0280	0.519315	0.872851	no change	0	74	161	0	78	0
StLNC0283	1.00928	0.502181	no change	16	71	27	0	11	28
StLNC0284	-2.66305	0.194353	no change	0	1	7	8	16	0
StLNC0285	4.4448	0.00374624	up	6	23	49	2	0	0
StLNC0286	0.0471941	0.91124	no change	114	206	378	140	155	113
StLNC0287	0.200729	0.942044	no change	0	10	10	0	9	0
StLNC0289	0.00409219	0.993388	no change	317	422	817	445	194	345
StLNC0290	-0.393637	0.890269	no change	0	12	15	0	0	21
StLNC0291	-2.98817	0.0926017	no change	2	2	0	1	3	23
StLNC0292	5.22053	0.00154372	up	6	10	17	0	0	0
StLNC0293	-1.38136	0.150017	no change	4	8	18	20	21	4
StLNC0295	0.273639	0.581911	no change	78	137	257	66	104	65
StLNC0296	1.56631	0.0355638	up	68	92	433	24	39	48
StLNC0297	0.0114667	0.983191	no change	19	56	80	34	33	25
StLNC0298	0.391223	0.827191	no change	20	1	41	0	19	11
StLNC0300	0.329972	0.765146	no change	16	25	51	25	1	20
StLNC0301	0.688117	0.266663	no change	65	156	244	84	55	33
StLNC0303	-2.56316	0.418605	no change	0	0	22	0	1	63
StLNC0304	1.01493	0.729253	no change	0	27	56	21	0	0
StLNC0305	-0.526615	0.392164	no change	13	19	47	32	15	22
StLNC0308	6.88231	6.97e-06	up	24	21	58	0	0	0
StLNC0312	-0.710083	0.213795	no change	9	20	18	18	16	16
StLNC0313	0.0431666	0.987417	no change	0	8	9	9	0	0
StLNC0314	0.0327633	0.98325	no change	0	18	41	2	13	15
StLNC0316	5.03718	0.118186	no change	0	7	30	0	0	0
StLNC0317	-0.483258	0.677299	no change	7	2	6	2	9	4
StLNC0319	0.0114874	0.993257	no change	4	12	21	0	8	14
StLNC0320	-1.55144	0.168478	no change	1	4	4	3	10	3
StLNC0321	0.00302478	0.999229	no change	30	0	38	0	0	53
StLNC0322	-0.862121	0.250355	no change	4	9	9	11	5	10
StLNC0325	-1.72948	0.0622839	no change	13	49	10	61	66	37
StLNC0326	-0.0481959	0.935056	no change	23	37	56	25	13	40
StLNC0327	0.202362	0.796105	no change	60	33	73	23	20	62
StLNC0328	-2.35239	0.129367	no change	0	18	31	10	21	109
StLNC0329	-0.400819	0.831078	no change	446	0	525	334	267	335
StLNC0330	-0.876547	0.441692	no change	1	3	5	6	2	2
StLNC0331	0.463432	0.230565	no change	343	455	793	305	220	209
StLNC0333	-2.3139	0.103554	no change	0	4	4	17	3	3
StLNC0334	-0.0157562	0.994893	no change	0	1	68	11	19	0
StLNC0337	0.0653278	0.919632	no change	10	19	25	6	12	15
StLNC0339	-3.2574	0.0498382	down	0	6	0	14	13	11
StLNC0340	0.164355	0.594038	no change	616	913	1600	535	492	746
StLNC0342	1.98907	0.229835	no change	6	7	13	0	4	0
StLNC0343	-0.330126	0.848072	no change	73	100	0	56	45	81
StLNC0344	-1.40872	0.0440922	down	8	7	23	13	20	30
StLNC0345	0.951708	0.166516	no change	9	34	43	10	6	11
StLNC0347	1.62474	0.355469	no change	12	1	6	4	1	0
StLNC0348	4.83382	0.217406	no change	0	0	35	0	0	0
StLNC0349	-0.667429	0.664095	no change	1	27	56	22	1	51
StLNC0350	-0.260152	0.775526	no change	10	13	37	23	15	4
StLNC0351	-0.13468	0.864398	no change	115	103	206	47	61	213
StLNC0352	-0.465534	0.45728	no change	8	11	14	11	8	11
StLNC0353	0.441561	0.417418	no change	36	48	73	15	24	37
StLNC0357	0.0964428	0.931376	no change	28	46	76	2	37	50
StLNC0358	0.118778	0.889102	no change	7	20	11	10	9	4
StLNC0363	5.50913	0.159307	no change	0	0	56	0	0	0
StLNC0365	-1.17991	0.380425	no change	5	0	13	13	6	6
StLNC0366	-1.19315	0.409365	no change	17	0	42	28	21	36
StLNC0367	-1.79043	0.405521	no change	5	0	14	31	8	0
StLNC0370	1.2133	0.31452	no change	3	6	14	3	0	3
StLNC0371	-1.74133	0.374265	no change	0	4	11	15	10	0
StLNC0376	5.89703	0.000161801	up	12	18	19	0	0	0
StLNC0379	0.507681	0.418107	no change	9	15	29	7	8	8
StLNC0380	-0.529901	0.816324	no change	20	0	0	8	6	17
StLNC0381	-0.205017	0.798856	no change	18	26	80	45	25	12
StLNC0382	3.67815	0.218428	no change	107	0	117	0	12	0
StLNC0383	0.940763	0.519217	no change	26	59	97	31	24	0
StLNC0384	-1.31681	0.219245	no change	2	10	23	23	20	4
StLNC0385	0.467875	0.731979	no change	9	22	28	7	0	21
StLNC0386	-1.46043	0.034809	down	15	32	26	45	61	24
StLNC0387	0.918919	0.515107	no change	6	8	3	2	0	5
StLNC0388	0.307012	0.755066	no change	9	37	17	20	9	4
StLNC0390	0.250602	0.947333	no change	0	0	17	0	6	0
StLNC0392	-0.760211	0.609446	no change	0	3	10	3	1	8
StLNC0394	4.11812	0.0031253	up	11	21	19	0	0	2
StLNC0397	0.465961	0.60191	no change	10	6	15	8	4	3
StLNC0400	-2.29722	0.112418	no change	1	4	15	45	4	3
StLNC0401	-0.104961	0.806946	no change	41	70	89	35	43	62
StLNC0402	4.9787	0.000235732	up	117	250	820	16	0	5
StLNC0403	5.06516	0.0179183	up	1	14	18	0	0	0
StLNC0405	-4.20043	0.0896942	no change	0	0	1	0	8	5
StLNC0406	6.55031	0.0449692	up	16	53	0	0	0	0
StLNC0408	-0.844296	0.409531	no change	4	15	45	30	5	29
StLNC0413	2.73784	0.310244	no change	13	10	0	3	0	0
StLNC0414	-3.26049	0.0409712	down	0	0	4	11	5	4
StLNC0416	3.81322	7.35e-05	up	146	313	154	18	2	11
StLNC0418	1.90723	0.35562	no change	38	44	69	0	0	29
StLNC0419	-0.131686	0.844998	no change	5	13	23	8	10	9
StLNC0421	3.22566	0.048687	up	12	30	12	4	0	0
StLNC0422	1.26985	0.481997	no change	5	9	13	7	0	0
StLNC0423	5.29732	0.176094	no change	0	33	0	0	0	0
StLNC0425	-1.41882	0.56467	no change	29	0	0	5	58	15
StLNC0428	1.82965	0.00740637	up	42	40	154	12	9	19
StLNC0429	3.83729	0.118547	no change	41	290	0	13	3	0
StLNC0430	-1.23998	0.101213	no change	6	12	35	32	25	14
StLNC0431	2.20802	0.4182	no change	3	0	31	0	0	4
StLNC0433	0.15952	0.94134	no change	0	32	38	0	7	29
StLNC0438	1.34386	0.651123	no change	17	31	0	0	14	0
StLNC0439	5.52256	0.0764441	no change	0	16	33	0	0	0
StLNC0440	-2.27806	0.334654	no change	0	34	41	0	151	38
StLNC0441	5.07512	0.109407	no change	0	18	15	0	0	0
StLNC0442	-1.59041	0.0672283	no change	1	7	6	7	10	9
StLNC0443	-0.220027	0.7439	no change	50	73	94	38	29	105
StLNC0445	-5.75641	0.14197	no change	0	0	0	20	0	0
StLNC0446	-0.621596	0.276763	no change	12	24	41	30	25	17
StLNC0447	-0.901464	0.12078	no change	11	15	28	25	23	15
StLNC0448	-1.98604	0.2578	no change	0	0	11	6	6	9
StLNC0449	-0.0283116	0.969124	no change	6	13	22	10	4	12
StLNC0451	0.460508	0.618495	no change	3	7	15	3	2	6
StLNC0452	0.0926739	0.943112	no change	4	4	7	5	4	0
StLNC0455	-0.34744	0.577636	no change	23	15	40	26	16	24
StLNC0458	-0.697426	0.119378	no change	67	85	163	75	121	128
StLNC0459	0.701214	0.649981	no change	8	0	27	4	2	7
StLNC0462	-0.216333	0.714211	no change	16	41	71	41	20	28
StLNC0463	2.19995	0.208412	no change	4	4	23	0	0	4
StLNC0464	-0.130436	0.93106	no change	25	30	61	0	32	50
StLNC0465	-0.461562	0.778196	no change	13	0	86	23	36	11
StLNC0467	5.29732	0.176094	no change	0	33	0	0	0	0
StLNC0468	-0.632739	0.774733	no change	0	12	45	36	0	8
StLNC0470	-1.87782	0.0895272	no change	2	3	8	15	11	2
StLNC0471	-0.747563	0.512104	no change	4	137	63	49	89	66
StLNC0472	1.42477	0.439042	no change	6	3	15	0	0	6
StLNC0473	2.86216	0.00717917	up	35	108	289	21	9	2
StLNC0476	-0.534101	0.567024	no change	13	6	25	12	5	26
StLNC0477	-0.446602	0.634328	no change	23	30	59	12	13	76
StLNC0479	4.73652	0.226906	no change	14	0	0	0	0	0
StLNC0480	-0.378766	0.535932	no change	51	171	111	86	65	135
StLNC0481	1.38318	4.9e-05	up	486	1043	1516	266	223	230
StLNC0482	-0.892709	0.500202	no change	0	19	23	15	19	8
StLNC0484	0.663695	0.501872	no change	45	92	100	13	68	11
StLNC0490	0.315129	0.858034	no change	53	4	46	60	1	2
StLNC0492	0.646636	0.636826	no change	6	24	35	0	14	10
StLNC0494	0.11625	0.9555	no change	0	27	34	0	13	18
StLNC0495	-0.259567	0.917487	no change	104	27	1	1	141	0
StLNC0496	0.837615	0.772604	no change	0	3	34	0	9	0
StLNC0497	10.979	4.45e-13	up	512	315	817	0	0	0
StLNC0498	1.01193	0.787317	no change	0	0	66	0	0	16
StLNC0500	0.129964	0.898854	no change	53	114	92	95	50	8
StLNC0501	0.85141	0.186122	no change	14	16	25	8	6	6
StLNC0502	5.90548	0.0325754	up	1	48	1	0	0	0
StLNC0503	0.706411	0.794752	no change	0	12	8	7	0	0
StLNC0504	-1.86157	0.400969	no change	10	9	0	0	21	40
StLNC0506	1.67552	0.296084	no change	27	7	123	0	18	9
StLNC0509	0.319021	0.583506	no change	15	28	57	18	10	21
StLNC0512	1.78133	0.105718	no change	73	110	21	9	7	32
StLNC0513	0.0725318	0.920127	no change	33	44	102	24	17	67
StLNC0514	5.89635	0.131806	no change	0	50	0	0	0	0
StLNC0516	-0.272001	0.704132	no change	6	10	12	10	5	7
StLNC0518	0.403616	0.599281	no change	39	182	76	40	37	73
StLNC0519	5.8503	0.0908514	no change	0	2	68	0	0	0
StLNC0520	5.62907	0.000524863	up	9	10	25	0	0	0
StLNC0521	1.21909	0.0146823	up	153	217	213	58	38	78
StLNC0522	-0.295864	0.706373	no change	8	21	10	8	9	16
StLNC0523	0.112127	0.976196	no change	0	0	34	14	0	0
StLNC0524	-1.64815	0.547819	no change	0	0	15	14	0	8
StLNC0528	1.40882	0.602782	no change	7	0	9	0	4	0
StLNC0529	-0.474647	0.418893	no change	27	27	58	44	33	22
StLNC0530	-0.159994	0.884671	no change	12	4	20	11	13	2
StLNC0531	1.51224	0.196903	no change	5	6	11	0	2	3
StLNC0532	0.196829	0.846351	no change	7	5	5	3	2	6
StLNC0535	0.144416	0.681753	no change	211	321	539	248	159	206
StLNC0538	-0.664451	0.565652	no change	4	1	12	3	9	4
StLNC0539	0.0398731	0.965969	no change	14	31	29	6	7	36
StLNC0541	-2.74625	0.00120732	down	3	10	8	39	36	13
StLNC0542	-0.329253	0.427	no change	1695	2348	3767	1772	1546	3108
StLNC0543	4.23304	4.78e-21	up	178	313	504	12	10	11
StLNC0544	0.124859	0.973424	no change	0	0	49	0	0	22
StLNC0545	-1.00815	0.160586	no change	4	8	12	13	10	7
StLNC0546	-1.18209	0.70742	no change	0	23	50	0	0	93
StLNC0547	-0.213735	0.716579	no change	35	51	37	41	28	31
StLNC0548	-1.0728	0.438562	no change	0	8	4	8	5	2
StLNC0550	-0.168532	0.764308	no change	9	27	33	17	14	17
StLNC0551	0.0676079	0.964872	no change	30	39	34	0	19	53
StLNC0554	-4.95018	0.0339402	down	0	1	1	36	0	2
StLNC0555	-0.297085	0.695423	no change	15	24	33	14	8	37
StLNC0557	-0.0884588	0.865108	no change	17	28	39	14	23	20
StLNC0559	0.882184	0.700762	no change	14	0	24	0	12	1
StLNC0561	-1.15279	0.19551	no change	4	3	17	10	6	16
StLNC0563	-1.83452	0.0594494	no change	7	10	23	37	41	6
StLNC0565	-1.28083	0.22703	no change	23	40	36	107	43	8
StLNC0568	1.30883	0.187156	no change	18	7	16	3	6	3
StLNC0569	-0.3548	0.913205	no change	0	96	0	20	0	66
StLNC0570	4.9785	0.117467	no change	0	10	24	0	0	0
StLNC0575	1.61539	0.452353	no change	0	51	10	5	0	8
StLNC0576	-1.22905	0.223002	no change	4	2	19	14	13	6
StLNC0577	7.33891	0.024417	up	18	0	157	0	0	0
StLNC0580	0.904983	0.447942	no change	6	11	12	0	6	4
StLNC0582	0.448772	0.719485	no change	6	9	8	4	0	8
StLNC0583	10.7839	5.49e-14	up	203	561	870	0	0	0
StLNC0585	-0.57969	0.841248	no change	4	5	0	11	0	0
StLNC0586	-0.347928	0.379425	no change	146	238	418	254	203	173
StLNC0587	-7.17385	0.0666622	no change	0	0	0	0	50	0
StLNC0588	-0.662435	0.825484	no change	15	0	0	0	12	13
StLNC0590	-6.3783	0.0112386	down	0	1	0	25	34	0
StLNC0591	1.43384	0.36835	no change	50	93	77	48	0	7
StLNC0592	-0.464477	0.550468	no change	44	67	81	80	71	19
StLNC0593	0.97541	0.437806	no change	5	12	29	5	0	9
StLNC0594	-0.00474216	0.989187	no change	266	500	914	374	311	338
StLNC0595	0.935246	0.589286	no change	12	101	58	0	5	54
StLNC0596	5.77115	0.0852299	no change	23	9	0	0	0	0
StLNC0597	-0.489827	0.871967	no change	0	13	0	11	0	1
StLNC0599	-3.93603	0.149574	no change	0	0	11	50	25	0
StLNC0600	-0.690591	0.282684	no change	15	22	60	18	38	37
StLNC0601	-2.15323	0.21808	no change	0	0	9	7	8	4
StLNC0602	1.18642	0.704382	no change	16	0	0	0	6	1
StLNC0603	-0.861844	0.533078	no change	0	38	49	33	24	29
StLNC0604	4.70522	0.230025	no change	0	0	32	0	0	0
StLNC0605	1.02727	0.435428	no change	12	12	8	0	4	8
StLNC0606	-0.533605	0.117308	no change	105	180	265	134	175	196
StLNC0607	0.907912	0.629311	no change	0	9	8	3	2	0
StLNC0609	0.21099	0.846576	no change	8	2	13	3	7	3
StLNC0611	1.07798	0.200757	no change	4	14	21	4	4	3
StLNC0613	0.526123	0.351271	no change	44	134	159	48	29	69
StLNC0614	3.64819	0.0521776	no change	6	2	36	0	0	2
StLNC0615	9.15284	1.74e-12	up	199	531	1317	1	1	0
StLNC0617	-0.264159	0.94381	no change	0	0	42	0	21	0
StLNC0618	-0.391395	0.662125	no change	45	20	34	56	22	20
StLNC0619	-1.26675	0.211271	no change	21	4	78	58	41	45
StLNC0620	-0.613763	0.319212	no change	34	76	113	96	72	38
StLNC0621	0.257583	0.899228	no change	5	3	3	7	0	0
StLNC0623	-0.418577	0.413775	no change	26	43	77	44	24	55
StLNC0624	10.299	2.36e-14	up	199	365	547	0	0	0
StLNC0625	0.885008	0.675265	no change	0	39	23	0	13	6
StLNC0628	-1.29227	0.043613	down	12	45	59	55	72	40
StLNC0629	0.930967	0.40031	no change	6	17	10	2	1	9
StLNC0630	0.885696	0.17583	no change	17	28	26	11	5	10
StLNC0632	2.56724	0.0949313	no change	60	216	819	85	9	1
StLNC0633	0.664886	0.652768	no change	23	67	35	0	27	26
StLNC0634	0.597047	0.370599	no change	13	31	27	7	8	16
StLNC0635	-1.3179	0.474704	no change	0	0	11	5	4	4
StLNC0636	-0.427067	0.606559	no change	8	8	11	11	3	11
StLNC0637	4.74937	0.225635	no change	0	0	33	0	0	0
StLNC0638	-6.18137	0.00135877	down	0	0	0	3	7	18
StLNC0640	1.95479	0.255639	no change	3	9	16	0	4	0
StLNC0642	-0.202365	0.77137	no change	8	39	44	27	14	22
StLNC0643	-0.941293	0.235526	no change	4	4	14	8	6	12
StLNC0644	0.318731	0.874166	no change	2	0	14	4	0	3
StLNC0646	4.917	0.121237	no change	0	13	18	0	0	0
StLNC0648	0.598615	0.451477	no change	7	11	12	6	4	3
StLNC0649	-1.40307	0.231275	no change	1	3	3	5	1	6
StLNC0651	4.82203	0.0239451	up	1	11	16	0	0	0
StLNC0652	-2.11032	0.0459948	down	0	4	10	9	13	11
StLNC0656	-0.165917	0.900088	no change	5	7	13	9	8	0
StLNC0659	-0.372232	0.519661	no change	116	130	119	107	76	160
StLNC0660	-2.19961	0.000133817	down	19	34	48	90	134	64
StLNC0661	0.275341	0.942047	no change	0	13	0	7	0	0
StLNC0662	0.547707	0.855112	no change	0	15	1	7	0	0
StLNC0663	-0.866387	0.542537	no change	4	5	0	4	5	4
StLNC0665	-0.0808971	0.948085	no change	3	1	10	1	3	5
StLNC0666	-1.81142	0.323382	no change	12	0	1	14	25	4
StLNC0667	8.09272	2.36e-07	up	36	49	179	0	0	0
StLNC0669	0.153572	0.805127	no change	58	95	168	69	76	30
StLNC0671	-0.757965	0.348276	no change	13	19	43	30	36	9
StLNC0675	1.97734	0.457756	no change	7	0	19	4	0	0
StLNC0677	-1.95539	0.17906	no change	0	11	23	14	6	53
StLNC0680	6.08135	0.0617848	no change	0	7	73	0	0	0
StLNC0682	-0.79158	0.350328	no change	20	37	109	81	60	19
StLNC0683	-1.12591	0.688247	no change	0	0	17	5	11	0
StLNC0684	6.66183	1.26e-05	up	12	32	49	0	0	0
StLNC0686	0.676629	0.385712	no change	19	53	55	23	5	23
StLNC0687	-0.0926523	0.966746	no change	8	0	49	0	8	26
StLNC0689	2.92163	0.010578	up	10	20	31	4	0	1
StLNC0691	-0.532515	0.79217	no change	6	0	7	0	4	10
StLNC0692	3.22949	0.0247906	up	146	228	311	34	12	0
StLNC0693	-0.697966	0.852244	no change	0	0	37	0	25	0
StLNC0694	-0.539036	0.520288	no change	9	5	10	6	11	7
StLNC0696	-0.0544967	0.971741	no change	11	34	24	0	9	40
StLNC0697	-0.133923	0.888755	no change	2	11	22	10	3	9
StLNC0698	-6.38873	0.102733	no change	0	0	0	31	0	0
StLNC0699	-1.63495	0.0898752	no change	63	61	29	53	79	252
StLNC0700	-0.334251	0.520445	no change	25	55	64	30	50	34
StLNC0702	-0.0695511	0.959234	no change	4	7	7	0	3	10
StLNC0703	-0.616671	0.45175	no change	9	23	34	28	25	7
StLNC0705	-1.17265	0.583299	no change	0	13	15	29	5	0
StLNC0706	-5.4174	0.0963495	no change	0	0	0	4	0	13
StLNC0707	1.67557	0.432244	no change	0	49	10	5	0	7
StLNC0709	0.00877122	0.989125	no change	22	27	25	13	13	26
StLNC0710	-4.35588	0.0401632	down	0	10	0	9	11	125
StLNC0711	-0.644396	0.822233	no change	0	4	17	16	0	0
StLNC0712	-2.01637	0.430919	no change	0	0	6	5	0	7
StLNC0713	-0.158727	0.839321	no change	3	14	15	8	5	9
StLNC0714	-0.526021	0.565566	no change	23	45	22	12	54	23
StLNC0715	-0.243144	0.907151	no change	10	0	19	15	0	8
StLNC0716	1.22943	0.117083	no change	50	38	158	25	27	10
StLNC0717	5.86173	0.00269134	up	10	4	42	0	0	0
StLNC0718	0.727664	0.72196	no change	14	14	18	0	0	21
StLNC0720	-1.71726	0.399452	no change	3	0	9	16	7	0
StLNC0721	8.77073	8.22e-12	up	147	491	900	1	1	0
StLNC0723	0.481281	0.574244	no change	14	28	57	7	26	8
StLNC0724	-0.999892	0.312385	no change	12	7	6	20	12	6
StLNC0725	5.98618	0.0548529	no change	0	17	53	0	0	0
StLNC0726	6.14173	6.44e-05	up	10	24	28	0	0	0
StLNC0728	1.02256	0.622712	no change	17	27	37	0	0	28
StLNC0730	-1.78966	0.543983	no change	3	2	0	15	0	0
StLNC0733	-0.341858	0.563235	no change	16	17	24	16	19	13
StLNC0735	-0.346468	0.344991	no change	70	108	186	114	87	89
StLNC0736	-1.02476	0.422871	no change	0	10	18	13	12	5
StLNC0737	-0.215777	0.593971	no change	96	137	243	90	102	161
StLNC0739	0.325816	0.860907	no change	0	10	12	5	0	5
StLNC0740	-0.824821	0.168219	no change	14	32	52	42	40	22
StLNC0741	0.760836	0.678035	no change	2	2	58	0	12	5
StLNC0742	0.185206	0.926444	no change	0	9	23	0	10	4
StLNC0743	-0.180506	0.672105	no change	55	148	174	77	93	95
StLNC0747	-0.74376	0.804651	no change	0	0	53	16	22	0
StLNC0748	0.136258	0.826298	no change	94	123	107	103	46	58
StLNC0749	-1.36162	0.435656	no change	29	5	19	52	0	61
StLNC0750	-0.446595	0.276212	no change	62	65	107	69	72	70
StLNC0751	-1.49679	0.413797	no change	0	38	2	17	46	7
StLNC0753	2.03349	0.231175	no change	7	5	19	0	0	5
StLNC0756	-1.08446	0.541949	no change	0	470	622	405	361	487
StLNC0757	0.284769	0.67	no change	7	13	16	6	6	7
StLNC0761	-0.244898	0.723745	no change	8	19	28	21	9	10
StLNC0762	-0.115304	0.847712	no change	13	21	30	20	14	10
StLNC0763	-1.60337	0.224553	no change	0	20	19	18	34	13
StLNC0764	-1.44621	0.645569	no change	13	8	0	51	0	0
StLNC0765	1.51613	0.523865	no change	54	1	1	19	1	0
StLNC0767	6.03378	0.122988	no change	0	55	0	0	0	0
StLNC0768	-2.03597	0.108458	no change	1	4	4	8	13	1
StLNC0769	0.771859	0.517582	no change	5	11	14	0	6	5
StLNC0771	-0.633122	0.314278	no change	54	31	59	46	52	62
StLNC0772	2.3605	0.0427826	up	12	47	37	7	0	5
StLNC0773	-1.40502	0.208447	no change	0	4	9	5	7	7
StLNC0774	0.403176	0.792681	no change	3	2	16	7	0	2
StLNC0775	-0.439645	0.338308	no change	203	308	416	175	328	313
StLNC0776	-0.939167	0.168548	no change	53	81	142	135	141	47
StLNC0777	0.175127	0.794154	no change	20	52	34	13	27	22
StLNC0779	1.419	0.181461	no change	7	8	73	7	6	4
StLNC0781	0.539045	0.180399	no change	37	62	94	31	26	27
StLNC0784	-0.404661	0.656193	no change	2	9	22	7	5	13
StLNC0785	5.16812	0.12144	no change	12	11	0	0	0	0
StLNC0788	2.60044	0.278881	no change	256	111	461	0	84	0
StLNC0790	-0.94745	0.509757	no change	2	17	3	2	3	25
StLNC0791	-0.664193	0.261265	no change	15	14	34	19	26	18
StLNC0793	-1.2331	0.491344	no change	29	0	3	12	33	29
StLNC0799	0.271124	0.818449	no change	51	87	170	40	103	4
StLNC0800	-1.1149	0.0793216	no change	23	25	34	27	28	68
StLNC0801	6.70664	0.0407166	up	16	62	0	0	0	0
StLNC0802	2.00384	0.475491	no change	18	0	40	0	0	10
StLNC0805	-0.420101	0.652213	no change	19	29	26	13	7	51
StLNC0806	-0.292809	0.67764	no change	43	36	39	22	29	56
StLNC0809	-0.315571	0.635548	no change	9	15	37	10	13	23
StLNC0810	-0.0120012	0.9808	no change	91	93	153	54	67	109
StLNC0811	-1.26549	0.685088	no change	16	0	16	0	0	63
StLNC0813	-0.902363	0.270756	no change	5	20	24	11	30	13
StLNC0814	0.921605	0.525496	no change	5	12	50	5	0	15
StLNC0815	8.3393	6.82e-08	up	93	78	443	0	0	1
StLNC0816	-0.786262	0.282146	no change	11	23	29	26	31	10
StLNC0817	5.51615	0.0833577	no change	0	9	43	0	0	0
StLNC0818	-1.29099	0.467123	no change	11	82	112	118	0	179
StLNC0819	-2.41833	0.0734937	no change	0	10	2	16	16	8
StLNC0820	-0.585587	0.268526	no change	23	41	60	48	42	26
StLNC0821	-0.539998	0.345658	no change	12	16	26	12	15	24
StLNC0823	0.0661217	0.979137	no change	0	57	82	0	64	2
StLNC0825	-1.63346	0.000476969	down	10	17	27	31	34	41
StLNC0827	-0.0102723	0.979363	no change	90	102	154	66	73	94
StLNC0828	0.376479	0.598846	no change	8	18	26	4	9	12
StLNC0830	4.93733	0.00819517	up	3	7	20	0	0	0
StLNC0834	-0.375888	0.664492	no change	2	13	19	6	7	13
StLNC0836	0.880183	0.100727	no change	71	70	168	25	44	37
StLNC0837	1.24385	0.388322	no change	44	23	44	19	14	0
StLNC0838	-2.12825	0.142606	no change	1	1	3	1	10	2
StLNC0839	-0.569837	0.693867	no change	0	20	42	7	26	14
StLNC0840	0.990324	0.487296	no change	32	61	43	30	0	18
StLNC0845	-0.930732	0.803974	no change	0	0	31	0	0	29
StLNC0846	0.0787666	0.895817	no change	21	43	41	20	29	15
StLNC0847	0.014753	0.980399	no change	17	45	44	17	16	35
StLNC0848	-0.580388	0.503739	no change	11	26	75	48	32	12
StLNC0851	0.488246	0.0964111	no change	117	178	271	84	77	98
StLNC0852	-1.07549	0.0525096	no change	37	88	58	77	67	118
StLNC0853	5.87033	0.00149623	up	4	13	43	0	0	0
StLNC0854	0.205487	0.742622	no change	13	16	23	11	6	13
StLNC0855	-2.43048	0.430183	no change	17	0	0	46	46	0
StLNC0859	0.470578	0.697318	no change	16	43	70	3	5	51
StLNC0860	4.27766	1.29e-07	up	76	162	508	7	10	4
StLNC0861	-0.350265	0.594141	no change	84	64	323	134	95	124
StLNC0865	-1.29267	0.733962	no change	0	6	0	0	9	0
StLNC0868	0.0547716	0.926987	no change	40	83	56	26	45	46
StLNC0869	1.68937	0.546988	no change	29	0	981	9	0	149
StLNC0870	-0.482828	0.540828	no change	341	173	442	388	383	145
StLNC0873	-0.986231	0.0431735	no change	16	32	66	43	48	44
StLNC0876	2.63623	0.150402	no change	72	1	12	1	1	12
StLNC0877	-4.48637	0.0849645	no change	0	0	7	32	0	45
StLNC0880	-0.636772	0.522991	no change	3	7	4	3	3	9
StLNC0881	-1.04943	0.653129	no change	0	12	75	19	62	0
StLNC0882	5.69662	1.22e-08	up	98	189	315	5	2	0
StLNC0883	-0.599886	0.233635	no change	14	29	28	22	24	24
StLNC0886	-0.691707	0.809199	no change	0	15	0	0	8	8
StLNC0889	0.0845619	0.915967	no change	7	8	13	7	7	3
StLNC0892	-0.0406282	0.950682	no change	11	17	25	6	14	15
StLNC0898	2.53043	0.505703	no change	0	0	52	4	0	0
StLNC0900	-2.98371	0.299933	no change	0	3	5	0	0	37
StLNC0903	-0.52916	0.807371	no change	0	22	0	11	4	6
StLNC0904	2.79308	0.0526722	no change	15	15	4	2	0	2
StLNC0905	0.0108603	0.98597	no change	19	30	22	18	12	19
StLNC0906	1.49938	0.39258	no change	1	7	40	1	0	8
StLNC0907	-0.834701	0.470324	no change	1	2	10	7	2	4
StLNC0908	0.406072	0.863231	no change	0	112	136	0	55	46
StLNC0909	1.34956	0.0527238	no change	15	21	53	10	6	5
StLNC0910	0.538654	0.680791	no change	2	6	8	2	0	5
StLNC0913	-3.07171	0.421856	no change	0	0	5	0	18	0
StLNC0915	1.0004	0.470968	no change	10	4	8	5	3	0
StLNC0917	2.33344	2.1e-05	up	151	229	566	49	35	27
StLNC0919	8.00064	3.39e-05	up	2089	5	452	1	7	1
StLNC0920	-0.65775	0.133473	no change	29	38	69	35	46	56
StLNC0922	0.777472	0.354808	no change	7	13	31	7	2	9
StLNC0923	1.54927	0.20639	no change	20	17	43	11	0	7
StLNC0924	1.78231	0.0346172	up	38	56	316	26	22	15
StLNC0926	-0.0729378	0.854366	no change	104	177	245	143	113	95
StLNC0927	0.588862	0.81473	no change	8	131	149	0	0	117
StLNC0928	4.09093	0.0468026	up	23	1	17	0	0	2
StLNC0930	-0.0092655	0.984977	no change	106	238	225	89	107	181
StLNC0932	-0.393313	0.646888	no change	4	10	17	7	13	4
StLNC0933	-2.02415	0.53058	no change	16	0	0	0	3	71
StLNC0934	3.11224	0.00443372	up	76	51	43	2	2	12
StLNC0935	0.414398	0.550688	no change	15	37	102	29	17	19
StLNC0936	3.44736	0.00412197	up	40	54	103	2	0	10
StLNC0939	-6.56447	0.0355695	down	0	0	0	19	15	0
StLNC0940	7.66251	0.000291792	up	1	1436	728	0	5	1
StLNC0942	4.71406	0.0808137	no change	6919	5595	8260	0	0	611
StLNC0944	-0.865161	0.137651	no change	8	16	25	20	21	14
StLNC0946	-0.193583	0.713439	no change	43	100	207	79	88	65
StLNC0947	0.602636	0.62696	no change	8	8	16	0	5	9
StLNC0948	0.879765	0.764435	no change	0	31	43	0	20	0
StLNC0953	0.157729	0.820331	no change	8	21	47	15	8	17
StLNC0954	1.63866	0.357894	no change	5	125	131	39	7	0
StLNC0957	1.8143	0.000269545	up	139	269	387	63	45	32
StLNC0958	1.75723	0.535349	no change	0	20	62	12	0	0
StLNC0959	-0.794525	0.195376	no change	62	99	150	82	65	207
StLNC0961	-0.745087	0.810798	no change	8	0	0	1	12	0
StLNC0962	0.804414	0.76782	no change	5	0	8	5	0	0
StLNC0964	-5.68695	0.14691	no change	0	0	0	0	0	21
StLNC0965	0.627712	0.78957	no change	5	35	93	0	42	0
StLNC0966	-1.37134	0.00179936	down	14	25	34	39	42	39
StLNC0967	-0.77266	0.123436	no change	19	51	60	37	39	64
StLNC0968	-0.856622	0.771453	no change	0	0	42	0	19	15
StLNC0969	3.05903	0.429575	no change	16	0	0	2	0	0
StLNC0970	1.54859	0.382341	no change	4	5	16	5	0	0
StLNC0971	1.31892	0.0344708	up	28	78	150	13	21	26
StLNC0972	0.62768	0.520555	no change	2	24	31	9	5	7
StLNC0973	-0.684314	0.612936	no change	4	9	7	11	0	11
StLNC0974	2.74543	0.171455	no change	44	35	11	0	0	12
StLNC0975	-1.66619	0.167662	no change	3	0	9	8	7	8
StLNC0976	6.60863	0.0910191	no change	51	0	0	0	0	0
StLNC0978	-0.0728516	0.960429	no change	17	20	45	0	33	20
StLNC0980	-5.60439	0.152953	no change	0	0	0	18	0	0
StLNC0982	-0.15944	0.792456	no change	15	53	78	28	24	46
StLNC0986	-0.260364	0.581041	no change	19	35	44	24	19	33
StLNC0988	-1.4947	0.448968	no change	0	7	7	6	15	0
StLNC0989	-1.91723	0.0185775	down	28	38	49	133	118	29
StLNC0991	0.372421	0.284273	no change	97	150	227	81	59	96
StLNC0993	-0.123743	0.868272	no change	135	161	218	68	67	257
StLNC0994	0.326614	0.592301	no change	24	18	39	12	16	15
StLNC0996	-1.11589	0.128038	no change	3	6	12	7	9	12
StLNC0997	-3.33726	0.254313	no change	0	0	23	0	78	23
StLNC1000	1.45752	0.477225	no change	11	25	56	0	18	0
StLNC1002	-0.929467	0.438117	no change	0	7	9	4	8	5
StLNC1003	5.80714	0.137789	no change	0	47	0	0	0	0
StLNC1004	0.422697	0.769637	no change	30	28	50	0	22	33
StLNC1005	-0.725289	0.476641	no change	5	31	12	21	5	27
StLNC1008	0.505726	0.562563	no change	6	9	13	3	2	8
StLNC1009	-0.528185	0.699392	no change	2	7	1	6	3	1
StLNC1010	0.412518	0.441581	no change	387	630	861	201	218	512
StLNC1011	-7.0757	0.0234537	down	0	0	0	20	28	0
StLNC1012	-0.226845	0.812565	no change	12	9	16	7	3	21
StLNC1013	-0.635307	0.701518	no change	6	1	3	6	6	0
StLNC1014	-0.369836	0.624371	no change	8	22	37	18	7	28
StLNC1015	-0.0729616	0.92385	no change	12	23	46	20	23	7
StLNC1017	-0.089987	0.955509	no change	5	37	21	1	1	43
StLNC1019	1.27355	0.538062	no change	7	32	40	19	0	0
StLNC1020	1.63444	0.389528	no change	217	319	69	11	0	153
StLNC1021	-6.24188	0.110965	no change	0	0	0	28	0	0
StLNC1027	-0.433818	0.315291	no change	57	89	120	54	86	93
StLNC1028	-0.0180282	0.996158	no change	0	0	57	0	24	0
StLNC1029	2.11745	0.48353	no change	0	4657	4671	1127	0	52
StLNC1030	2.86732	0.000138735	up	60	141	295	21	12	6
StLNC1032	8.24851	0.00015775	up	2	442	715	2	0	0
StLNC1035	-1.04289	0.192573	no change	27	33	81	87	67	20
StLNC1038	-0.191425	0.813325	no change	663	3350	2548	769	1077	2921
StLNC1040	0.160938	0.923405	no change	14	3	4	0	4	13
StLNC1041	4.76521	0.187634	no change	1	0	31	0	0	0
StLNC1043	-0.16827	0.902746	no change	1	107	160	68	66	23
StLNC1044	1.2985	0.303631	no change	22	33	27	11	0	13
StLNC1045	5.65987	0.0223596	up	0	43	58	0	0	1
StLNC1048	-0.346489	0.612046	no change	6	12	15	6	8	13
StLNC1050	0.580044	0.735298	no change	13	13	1	0	8	7
StLNC1053	-5.52758	0.119359	no change	0	0	0	16	1	0
StLNC1056	-0.233132	0.740204	no change	340	1241	1385	360	564	1241
StLNC1057	-1.26549	0.0709822	no change	10	44	33	27	41	65
StLNC1058	-1.75946	0.0843405	no change	8	4	2	14	11	13
StLNC1061	-3.34633	0.0710077	no change	0	1	12	3	3	63
StLNC1064	3.37503	0.124234	no change	16	0	8	1	0	1
StLNC1065	0.695145	0.403059	no change	39	16	28	12	14	13
StLNC1068	0.132116	0.888335	no change	5	4	12	2	6	4
StLNC1070	-2.22901	0.00402423	down	20	11	25	38	41	109
StLNC1071	-1.0625	0.223294	no change	17	107	77	129	86	37
StLNC1073	3.58935	0.00576984	up	48	82	24	3	0	7
StLNC1077	-1.92304	0.0231135	down	10	18	20	49	54	12
StLNC1078	0.140819	0.948844	no change	1	1	463	56	1	144
StLNC1079	-0.930723	0.101449	no change	9	14	18	20	12	19
StLNC1080	1.62898	0.00683815	up	192	505	652	67	54	154
StLNC1081	-0.874251	0.560129	no change	7	7	0	4	11	6
StLNC1082	-5.25258	0.113719	no change	0	0	0	0	3	12
StLNC1085	-6.56447	0.0355695	down	0	0	0	19	15	0
StLNC1089	-5.20367	0.113243	no change	0	0	0	10	0	4
StLNC1091	-0.196191	0.926698	no change	9	8	0	12	0	5
StLNC1092	0.937627	0.626238	no change	0	12	24	0	4	6
StLNC1093	1.32141	0.35399	no change	167	210	555	1	60	174
StLNC1096	1.61189	0.418311	no change	8	0	22	0	3	3
StLNC1099	5.64497	0.149201	no change	0	42	0	0	0	0
StLNC1101	-0.7532	0.683976	no change	16	2	11	34	4	0
StLNC1106	-0.824747	0.70301	no change	0	18	23	7	30	0
StLNC1107	-0.45599	0.516262	no change	19	24	18	12	19	29
StLNC1109	-0.174107	0.82459	no change	526	2148	1965	503	741	2078
StLNC1110	-0.97788	0.761952	no change	0	0	91	71	8	0
StLNC1111	-0.462458	0.681835	no change	14	8	22	27	11	2
StLNC1112	0.0339439	0.95473	no change	19	27	29	14	11	25
StLNC1113	-0.496624	0.692628	no change	32	7	7	24	26	6
StLNC1114	4.13181	0.117358	no change	13	8	0	0	1	0
StLNC1115	-0.200439	0.924512	no change	8	5	0	4	0	10
StLNC1116	5.42804	0.000886125	up	5	25	54	1	0	0
StLNC1120	-0.258843	0.830244	no change	19	15	2	7	10	20
StLNC1122	-0.672661	0.387708	no change	16	24	12	15	14	32
StLNC1124	-0.480478	0.81478	no change	0	19	20	17	12	0
StLNC1125	0.353109	0.78976	no change	4	4	7	0	2	6
StLNC1127	1.07483	0.120993	no change	51	91	355	34	46	50
StLNC1128	1.6583	0.0655898	no change	60	231	83	34	33	11
StLNC1129	0.125051	0.86	no change	10	15	14	11	7	6
StLNC1131	2.08707	0.0651892	no change	12	17	12	3	0	4
StLNC1132	-1.72034	0.0552566	no change	3	8	10	19	18	5
StLNC1133	5.5596	0.155493	no change	0	0	58	0	0	0
StLNC1134	5.40198	0.0833586	no change	0	17	27	0	0	0
StLNC1135	-5.69885	0.146055	no change	0	0	0	0	18	0
StLNC1136	-0.770442	0.240739	no change	21	32	57	49	47	19
StLNC1137	2.50999	0.50916	no change	0	35	0	4	0	0
StLNC1138	-4.1054	0.0201538	down	1	0	0	4	2	7
StLNC1139	-0.333976	0.667021	no change	124	114	156	65	61	235
StLNC1141	4.98887	0.0595243	no change	20	0	103	0	2	0
StLNC1142	0.949692	0.168858	no change	151	316	526	125	135	44
StLNC1144	1.03569	0.540006	no change	141	242	474	140	104	0
StLNC1145	0.460847	0.37547	no change	55	105	150	49	59	31
StLNC1146	-0.0878949	0.87648	no change	46	65	58	32	32	62
StLNC1147	-0.589496	0.390139	no change	7	10	18	7	15	11
StLNC1148	-5.15524	0.0100598	down	0	0	0	5	6	2
StLNC1149	-0.82182	0.603479	no change	1	2	6	7	2	0
StLNC1150	1.50552	0.440458	no change	0	18	17	5	0	2
StLNC1151	-1.22439	0.415213	no change	8	5	12	18	20	0
StLNC1154	-0.56396	0.387936	no change	38	174	195	128	72	165
StLNC1156	-1.53742	0.315788	no change	27	0	48	58	23	67
StLNC1157	-2.64927	9.02e-05	down	16	14	17	69	89	45
StLNC1159	-1.4211	0.455292	no change	3	24	0	29	19	1
StLNC1162	12.4828	4.7e-18	up	666	1604	3129	0	0	0
StLNC1163	3.4248	0.0284218	up	1	49	131	1	1	7
StLNC1166	-0.486462	0.735953	no change	6	13	7	10	14	0
StLNC1168	2.66205	0.0863084	no change	104	250	74	15	31	0
StLNC1169	-0.384132	0.560584	no change	119	287	405	320	211	105
StLNC1170	4.19888	6.38e-10	up	297	390	486	16	5	23
StLNC1172	1.23439	0.259917	no change	13	6	10	4	4	1
StLNC1175	1.22085	0.644794	no change	0	10	13	0	5	0
StLNC1176	-0.373951	0.422102	no change	165	346	334	199	178	350
StLNC1177	-0.825638	0.120298	no change	221	321	415	450	423	224
StLNC1180	0.599587	0.685812	no change	2	8	9	0	1	7
StLNC1181	-0.807227	0.260093	no change	3	8	11	8	7	9
StLNC1182	-2.3291	0.284878	no change	6	0	18	46	24	0
StLNC1184	0.293808	0.835193	no change	596	61	785	62	57	774
StLNC1186	2.05574	0.422374	no change	0	6	19	3	0	0
StLNC1187	-0.222001	0.758025	no change	8	7	15	8	5	10
StLNC1188	-0.855373	0.665942	no change	4	0	11	10	0	7
StLNC1189	0.709018	0.831696	no change	0	178	0	27	41	0
StLNC1190	-0.161152	0.864808	no change	8	18	16	5	4	23
StLNC1193	2.71973	0.0798813	no change	2	25	87	0	3	6
StLNC1194	0.936005	0.640917	no change	3	16	5	0	0	9
StLNC1196	0.530524	0.115095	no change	169	289	451	106	137	153
StLNC1198	-2.49254	0.00438277	down	3	5	16	44	20	14
StLNC1199	-4.62705	0.220277	no change	0	0	3	0	0	39
StLNC1200	3.98021	0.14092	no change	3	21	0	1	0	0
StLNC1202	0.177864	0.91002	no change	0	4	23	6	1	5
StLNC1204	0.269675	0.692834	no change	9	38	32	10	14	17
StLNC1207	-0.330911	0.424769	no change	238	271	543	355	222	270
StLNC1208	0.60655	0.822541	no change	0	6	15	7	0	0
StLNC1210	1.11595	0.42448	no change	17	10	23	3	0	14
StLNC1212	3.91055	0.0136738	up	4	7	16	0	1	0
StLNC1213	4.24848	0.00166067	up	9	89	18	2	1	1
StLNC1214	1.71919	0.524193	no change	0	230	2	19	25	0
StLNC1215	1.8266	0.050687	no change	51	187	38	22	19	13
StLNC1217	4.09118	0.00568397	up	20	13	10	1	0	1
StLNC1218	-1.01092	0.787876	no change	0	16	0	21	0	0
StLNC1219	4.1774	5.8e-06	up	55	103	485	3	8	8
StLNC1220	-6.8924	0.0280221	down	0	0	0	29	14	0
StLNC1221	-0.314833	0.706163	no change	15	9	40	27	12	10
StLNC1222	-1.45049	0.0551382	no change	5	5	8	10	14	8
StLNC1223	1.92102	0.0414627	up	27	201	70	16	9	27
StLNC1226	-0.593072	0.793468	no change	9	0	15	22	2	0
StLNC1228	-5.75398	0.142141	no change	0	0	0	0	0	22
StLNC1229	-2.2275	0.291254	no change	1	0	87	80	97	3
StLNC1230	0.835858	0.52361	no change	2	5	8	3	2	0
StLNC1231	-0.116831	0.911303	no change	12	7	37	22	11	3
StLNC1233	3.0975	0.00919889	up	15	126	460	21	10	4
StLNC1234	-1.05397	0.363477	no change	0	5	13	6	7	7
StLNC1235	-0.238678	0.729469	no change	5	10	13	8	6	7
StLNC1236	-2.66974	0.170079	no change	4	0	0	11	10	3
StLNC1237	-3.3077	0.190267	no change	0	44	59	0	452	66
StLNC1239	-6.77416	0.0300155	down	0	0	0	17	22	0
StLNC1240	-0.916447	0.491154	no change	3	33	5	8	35	6
StLNC1243	0.44976	0.170343	no change	145	201	274	93	87	120
StLNC1245	1.16411	0.359269	no change	8	6	24	5	5	0
StLNC1249	-1.36745	0.505465	no change	0	9	6	18	4	0
StLNC1250	-0.730803	0.327306	no change	13	19	19	8	19	31
StLNC1251	0.588158	0.686151	no change	32	41	65	0	35	24
StLNC1253	0.633678	0.331133	no change	26	45	75	11	14	35
StLNC1254	-0.720977	0.610584	no change	5	7	5	10	9	0
StLNC1255	1.75007	0.139314	no change	9	15	22	0	2	7
StLNC1256	-1.34104	0.0801132	no change	3	4	12	9	11	9
StLNC1257	-0.6052	0.520244	no change	205	243	53	147	203	262
StLNC1258	-1.35715	0.379723	no change	19	10	0	16	21	31
StLNC1262	-1.40048	0.474577	no change	25	2	3	38	0	41
StLNC1263	-0.277298	0.712234	no change	16	12	21	11	20	9
StLNC1264	0.0115312	0.983382	no change	20	26	36	12	17	25
StLNC1268	3.33205	0.255512	no change	0	73	211	14	0	0
StLNC1269	5.08365	0.0105565	up	29	6	5	1	0	0
StLNC1270	0.260627	0.757794	no change	15	10	12	6	5	12
StLNC1272	-0.323458	0.818903	no change	7	16	23	18	16	0
StLNC1273	0.874232	0.372726	no change	6	49	56	7	20	7
StLNC1275	-0.0818132	0.976527	no change	282	686	0	265	0	573
StLNC1277	0.422375	0.590462	no change	209	355	258	47	190	188
StLNC1278	-1.75047	0.130205	no change	0	8	9	13	13	6
StLNC1279	0.784446	0.714875	no change	8	18	57	0	0	29
StLNC1280	5.37699	0.0375649	up	20	1	3	0	0	0
StLNC1281	3.31325	0.0489584	up	3	18	9	0	0	2
StLNC1282	-0.199432	0.848197	no change	3	28	34	4	18	21
StLNC1284	5.19476	0.184685	no change	0	0	45	0	0	0
StLNC1285	-0.497772	0.422035	no change	11	14	24	19	15	10
StLNC1286	0.105517	0.944268	no change	14	31	36	9	0	42
StLNC1287	-0.212242	0.861399	no change	5	74	79	61	34	6
StLNC1290	-5.72743	0.0719453	no change	0	0	0	10	9	0
StLNC1292	-1.08999	0.443935	no change	0	20	31	31	19	7
StLNC1293	5.41476	0.102285	no change	8	23	0	0	0	0
StLNC1296	-0.835024	0.671916	no change	0	4	7	2	8	0
StLNC1297	-1.0197	0.160166	no change	11	8	16	17	20	10
StLNC1299	-1.07502	0.688548	no change	0	0	10	6	0	4
StLNC1301	0.0194805	0.978856	no change	119	202	77	118	71	101
StLNC1303	-1.4308	0.137481	no change	4	9	7	21	10	4
StLNC1305	0.456337	0.727949	no change	64	47	81	27	1	76
StLNC1308	-0.0163945	0.993562	no change	7	0	11	8	4	0
StLNC1310	-1.65498	0.1305	no change	6	4	6	23	9	3
StLNC1313	-0.48017	0.830018	no change	3	0	32	19	5	0
StLNC1314	2.49005	0.144393	no change	14	13	28	0	6	0
StLNC1315	1.97024	0.476613	no change	11	8	0	0	4	0
StLNC1316	0.355769	0.704758	no change	15	19	51	8	4	30
StLNC1317	0.382015	0.358296	no change	45	81	142	50	34	43
StLNC1318	0.338977	0.823693	no change	25	5	2	2	16	5
StLNC1319	-1.33795	0.336672	no change	8	0	12	18	10	6
StLNC1320	-0.0732231	0.903011	no change	9	26	28	12	11	19
StLNC1325	-0.688422	0.46319	no change	64	132	53	27	95	171
StLNC1326	0.491776	0.524156	no change	7	21	15	9	4	7
StLNC1327	-5.28888	0.103288	no change	0	0	0	7	7	0
StLNC1328	-0.485583	0.494492	no change	6	16	14	8	8	17
StLNC1330	0.6687	0.42591	no change	8	12	16	2	4	9
StLNC1331	-0.0475679	0.967239	no change	81	105	128	15	18	201
StLNC1334	1.60664	0.667728	no change	56	0	0	0	18	0
StLNC1335	0.530803	0.25561	no change	556	937	1514	566	421	301
StLNC1338	-1.59051	0.480856	no change	0	0	82	17	31	66
StLNC1339	1.77203	0.0294153	up	18	86	90	7	7	21
StLNC1341	-0.00754946	0.996168	no change	0	21	69	6	27	11
StLNC1343	-0.674136	0.105371	no change	86	101	171	134	133	102
StLNC1345	0.523638	0.382624	no change	28	20	53	14	15	17
StLNC1346	0.232232	0.912358	no change	0	33	22	16	10	0
StLNC1347	-0.765486	0.290077	no change	11	6	25	14	17	14
StLNC1348	1.68766	0.223044	no change	20	30	63	17	4	0
StLNC1349	10.3384	0.00286489	up	0	969	174	0	0	0
StLNC1350	-0.179175	0.926932	no change	4	0	10	0	4	6
StLNC1353	1.09549	0.413613	no change	15	112	89	5	49	3
StLNC1355	0.338126	0.861547	no change	4	7	9	0	0	11
StLNC1358	0.641596	0.801433	no change	808	1101	1	1	935	1
StLNC1359	0.893999	0.811722	no change	0	0	57	0	0	15
StLNC1361	0.280143	0.887236	no change	6	0	13	0	5	5
StLNC1365	4.70522	0.230025	no change	0	0	32	0	0	0
StLNC1366	5.80943	0.137633	no change	0	0	69	0	0	0
StLNC1367	2.65016	0.0362843	up	27	50	139	10	9	0
StLNC1368	0.158741	0.82781	no change	41	31	50	41	19	16
StLNC1369	-1.50168	0.0350291	down	3	8	15	12	11	22
StLNC1373	1.16294	0.514216	no change	5	4	6	0	0	5
StLNC1374	5.48322	0.161293	no change	0	0	55	0	0	0
StLNC1375	-0.72514	0.116239	no change	33	41	74	38	50	70
StLNC1376	-10.299	0.00187687	down	0	0	0	0	297	164
StLNC1380	3.16685	0.0497496	up	4	15	31	0	3	0
StLNC1381	6.78549	0.028038	up	0	51	61	0	0	0
StLNC1382	3.13331	0.123951	no change	9	12	1	2	0	0
StLNC1383	0.765559	0.713423	no change	3	0	24	5	3	0
StLNC1384	0.0794202	0.928831	no change	13	10	71	21	18	10
StLNC1385	-0.202535	0.838257	no change	3	7	31	7	13	5
StLNC1390	-1.62629	0.12309	no change	0	7	11	11	10	10
StLNC1394	9.3459	8.63e-13	up	217	619	1514	1	1	0
StLNC1396	0.928342	0.639693	no change	8	5	21	11	0	0
StLNC1398	-4.26786	0.0784481	no change	0	33	39	302	0	492
StLNC1399	0.661783	0.209488	no change	127	215	242	51	68	128
StLNC1400	0.080326	0.977342	no change	0	10	22	0	0	17
StLNC1404	-0.152988	0.832098	no change	7	24	23	7	12	19
StLNC1407	0.564152	0.158832	no change	37	75	104	32	26	34
StLNC1408	-0.183814	0.91712	no change	1	14	52	36	1	1
StLNC1409	0.732951	0.694982	no change	0	6	16	4	0	3
StLNC1410	0.807355	0.330671	no change	10	20	16	4	3	11
StLNC1413	3.49904	0.172188	no change	11	0	25	2	0	0
StLNC1414	-0.0341272	0.942391	no change	22	60	64	32	30	32
StLNC1415	-0.752022	0.797793	no change	10	0	0	11	0	7
StLNC1416	-0.44344	0.63327	no change	60	62	59	75	82	14
StLNC1419	2.69343	0.148387	no change	28	51	59	0	0	15
StLNC1421	0.458956	0.186584	no change	155	200	393	101	117	125
StLNC1422	-2.09277	0.577933	no change	7	0	0	0	0	34
StLNC1424	-0.705479	0.57761	no change	0	11	14	4	7	12
StLNC1426	-0.373632	0.876277	no change	0	22	25	1	30	0
StLNC1427	5.11108	0.191923	no change	0	29	0	0	0	0
StLNC1431	0.409156	0.497016	no change	36	73	44	30	25	24
StLNC1432	-0.203431	0.601789	no change	302	345	510	237	304	352
StLNC1433	-1.10004	0.145337	no change	9	36	27	52	23	22
StLNC1436	-2.60751	0.486816	no change	0	0	22	0	56	0
StLNC1437	-0.927915	0.659768	no change	3	10	0	0	6	13
StLNC1438	-1.27104	0.0169317	down	50	68	103	146	123	72
StLNC1441	-2.36969	0.0463242	down	6	16	14	57	55	3
StLNC1442	-3.17867	0.277799	no change	0	0	27	41	64	0
StLNC1443	-0.142639	0.91617	no change	2	6	6	0	3	7
StLNC1451	3.22554	0.00336774	up	14	17	24	1	0	3
StLNC1452	-3.18303	0.0712145	no change	0	2	16	26	1	57
StLNC1454	-2.08304	0.411049	no change	52	0	118	221	216	0
StLNC1455	-1.26816	0.196199	no change	1	7	10	12	9	4
StLNC1457	0.94773	0.520306	no change	45	47	53	0	15	40
StLNC1458	2.03272	0.227034	no change	6	5	5	0	0	3
StLNC1460	-0.623619	0.165864	no change	35	50	80	44	43	78
StLNC1462	-0.994245	0.61511	no change	2	16	0	22	1	2
StLNC1463	10.8366	7.07e-09	up	75	1067	511	0	0	0
StLNC1467	0.57197	0.479752	no change	10	10	13	7	5	3
StLNC1469	0.797518	0.716891	no change	13	7	57	25	0	0
StLNC1472	1.1558	0.245036	no change	12	50	32	3	5	20
StLNC1473	0.330561	0.766647	no change	3	5	3	2	2	2
StLNC1474	-0.693846	0.312603	no change	49	67	87	35	54	135
StLNC1475	8.39001	0.0117922	up	0	29	371	0	0	0
StLNC1478	7.29243	2.67e-05	up	52	24	36	0	0	0
StLNC1479	1.40068	0.630193	no change	0	4	51	0	9	0
StLNC1480	1.3479	0.27452	no change	4	11	29	5	0	5
StLNC1482	0.931487	0.150932	no change	12	32	31	11	7	7
StLNC1483	2.13726	0.401362	no change	0	11	15	0	3	0
StLNC1485	0.539405	0.676656	no change	1	11	34	7	1	9
StLNC1486	-0.893114	0.429239	no change	2	3	9	2	10	3
StLNC1487	3.93269	0.0217898	up	6	60	35	4	0	0
StLNC1488	-1.92381	0.0287399	down	2	20	28	21	36	52
StLNC1489	4.45403	0.00368737	up	9	24	83	0	0	3
StLNC1490	-0.00136776	0.998635	no change	4	7	11	5	3	6
StLNC1491	-4.1498	0.188809	no change	0	34	0	0	192	207
StLNC1493	-0.446559	0.477201	no change	18	22	74	29	21	43
StLNC1494	0.669127	0.389489	no change	16	17	70	10	18	9
StLNC1496	8.86393	3.93e-17	up	2015	5297	19116	21	6	3
StLNC1498	-0.803621	0.179335	no change	22	46	47	64	36	29
StLNC1499	4.93145	0.178637	no change	1	24	0	0	0	0
StLNC1500	6.32993	0.00422517	up	11	2	70	0	0	0
StLNC1504	-1.15638	0.561857	no change	5	0	4	7	0	9
StLNC1505	-0.100973	0.905735	no change	10	35	43	32	17	7
StLNC1506	-5.17376	0.1149	no change	0	0	0	0	4	10
StLNC1512	-0.334521	0.555189	no change	44	47	63	36	30	69
StLNC1514	1.61339	0.0261529	up	21	24	31	3	5	9
StLNC1515	0.418752	0.849133	no change	19	24	0	11	0	17
StLNC1516	0.814838	0.0788628	no change	144	286	424	131	94	74
StLNC1517	10.4814	1.28e-08	up	50	1453	1182	0	1	0
StLNC1518	3.53885	0.228202	no change	11	0	189	0	0	9
StLNC1519	-0.41149	0.615923	no change	11	5	20	8	14	9
StLNC1521	0.654049	0.591325	no change	4	8	7	0	4	4
StLNC1522	0.353671	0.486552	no change	98	178	216	69	53	132
StLNC1525	-2.0205	0.195893	no change	2	0	3	1	3	10
StLNC1526	0.0665265	0.905394	no change	25	21	47	23	17	18
StLNC1528	-5.34771	0.132905	no change	0	0	0	14	1	0
StLNC1529	4.18597	0.0789589	no change	0	55	3	1	1	0
StLNC1532	0.149447	0.927441	no change	75	111	172	0	87	123
StLNC1533	0.3146	0.820983	no change	13	1	17	9	7	1
StLNC1534	-3.26553	0.0517113	no change	0	0	3	3	3	10
StLNC1538	-1.01378	0.152097	no change	4	7	13	7	12	11
StLNC1539	6.87772	0.0103335	up	90	0	70	0	0	1
StLNC1540	-0.541685	0.69542	no change	0	24	48	15	24	15
StLNC1541	-1.6301	0.187641	no change	13	4	18	49	21	3
StLNC1544	5.31433	0.108426	no change	9	19	0	0	0	0
StLNC1547	6.18124	8.44e-05	up	14	25	20	0	0	0
StLNC1549	-7.94399	0.0117681	down	0	0	0	24	0	74
StLNC1551	-3.72563	0.208544	no change	0	0	24	30	105	0
StLNC1552	-2.48671	0.0306709	down	3	24	5	11	55	53
StLNC1553	5.6789	0.146755	no change	0	43	0	0	0	0
StLNC1555	-0.193205	0.784372	no change	12	19	14	14	13	8
StLNC1556	1.19267	0.0901969	no change	13	30	23	8	6	5
StLNC1557	0.875122	0.296193	no change	14	7	23	7	4	5
StLNC1558	0.345618	0.805042	no change	2	2	9	0	3	3
StLNC1559	-0.134209	0.912548	no change	113	297	71	56	22	327
StLNC1560	0.217629	0.760243	no change	23	19	20	10	11	18
StLNC1561	-1.22066	0.687843	no change	7	0	23	0	0	45
StLNC1562	4.62241	2.11e-11	up	1132	3451	4499	79	30	120
StLNC1564	-6.38873	0.102733	no change	0	0	0	31	0	0
StLNC1565	2.92452	0.269999	no change	9	9	0	2	0	0
StLNC1567	5.47568	0.0310008	up	0	16	83	1	0	0
StLNC1570	0.244949	0.65611	no change	24	65	52	24	20	34
StLNC1574	0.593685	0.540541	no change	6	8	15	1	7	4
StLNC1575	2.01854	0.280535	no change	56	0	113	13	1	14
StLNC1576	0.564071	0.70928	no change	44	67	84	0	31	58
StLNC1579	-2.70232	0.41119	no change	0	61	0	38	0	243
StLNC1583	-0.267097	0.801755	no change	3	6	7	2	8	2
StLNC1584	-0.262526	0.770267	no change	16	30	39	43	14	7
StLNC1585	6.89298	0.033698	up	31	50	0	0	0	0
StLNC1586	0.236197	0.843227	no change	1	3	16	4	3	2
StLNC1588	-0.305806	0.927108	no change	0	0	242	31	0	112
StLNC1590	6.6711	0.0612676	no change	52	0	3	0	0	0
StLNC1591	1.16134	0.137192	no change	11	23	19	4	3	9
StLNC1594	1.74942	0.165358	no change	6	4	17	0	2	3
StLNC1595	7.73167	8.5e-06	up	71	28	54	0	0	0
StLNC1597	0.456957	0.735896	no change	14	21	32	15	15	0
StLNC1599	-2.07464	0.0813849	no change	1	3	2	5	9	2
StLNC1600	-1.14058	0.178101	no change	14	26	38	52	43	10
StLNC1601	3.35359	0.170025	no change	43	131	1	0	12	0
StLNC1603	1.9276	0.453587	no change	0	7	21	0	0	4
StLNC1604	-0.522753	0.779468	no change	24	7	153	112	0	31
StLNC1606	5.79762	0.00137763	up	4	14	38	0	0	0
StLNC1607	-0.693288	0.237205	no change	20	30	52	22	27	57
StLNC1608	0.22928	0.664167	no change	18	22	41	17	14	13
StLNC1609	4.76477	0.000130081	up	13	72	104	3	0	1
StLNC1610	-4.67823	0.0374565	down	3	0	0	10	1	69
StLNC1611	-0.888534	0.282057	no change	26	26	56	19	24	91
StLNC1612	4.29658	4.17e-05	up	144	592	962	2	21	27
StLNC1614	1.36501	0.603041	no change	0	10	17	0	0	6
StLNC1615	2.25929	0.130847	no change	6	41	89	12	3	0
StLNC1618	0.57694	0.404626	no change	14	18	32	6	6	16
StLNC1619	0.956914	0.192513	no change	14	24	24	11	6	4
StLNC1620	1.64481	0.0556464	no change	8	10	35	3	3	4
StLNC1621	6.83061	0.0534082	no change	57	4	0	0	0	0
StLNC1622	0.421281	0.876644	no change	0	7	12	0	7	0
StLNC1623	-1.79742	0.421992	no change	0	0	56	40	38	7
StLNC1624	-8.23906	3.5e-05	down	0	0	0	8	19	92
StLNC1627	-0.212022	0.676055	no change	83	127	151	69	67	146
StLNC1628	0.917738	0.460682	no change	4	12	21	4	0	8
StLNC1629	0.518611	0.86225	no change	0	27	54	29	0	0
StLNC1630	-0.528477	0.430765	no change	57	64	71	34	53	110
StLNC1632	-1.80607	0.0268809	down	5	6	9	16	6	25
StLNC1633	-1.75362	0.379189	no change	5	0	0	6	3	8
StLNC1636	0.624122	0.417149	no change	14	35	58	9	7	27
StLNC1637	-0.349541	0.809535	no change	2	0	9	2	3	3
StLNC1638	-0.651083	0.385391	no change	5	6	16	12	7	7
StLNC1639	0.0549446	0.944286	no change	17	42	41	37	14	10
StLNC1640	0.806012	0.14823	no change	69	74	104	40	18	39
StLNC1641	-2.47584	0.373713	no change	0	0	18	0	21	25
StLNC1643	-0.798871	0.374375	no change	129	155	47	89	134	235
StLNC1644	-0.851523	0.703366	no change	0	32	47	23	49	0
StLNC1645	5.6625	0.0648483	no change	51	1	0	0	1	0
StLNC1646	5.26043	0.104272	no change	9	0	26	0	0	0
StLNC1647	3.35427	0.0195658	up	7	15	7	1	0	1
StLNC1649	1.82758	0.470812	no change	0	8	12	3	0	0
StLNC1652	-4.45898	2.09e-05	down	0	8	4	54	67	38
StLNC1653	6.15577	3.22e-06	up	31	73	138	2	0	0
StLNC1656	-1.89517	0.561733	no change	0	0	36	0	55	1
StLNC1657	0.0637689	0.954601	no change	71	110	17	18	82	45
StLNC1658	-0.960661	0.102515	no change	9	13	18	18	19	13
StLNC1660	2.84422	0.104222	no change	17	36	44	0	8	0
StLNC1661	0.673779	0.375418	no change	11	11	43	6	10	8
StLNC1663	6.02234	0.123704	no change	34	0	0	0	0	0
StLNC1667	3.35768	0.0672875	no change	21	26	5	4	0	0
StLNC1668	-1.00721	0.214605	no change	15	19	38	45	34	10
StLNC1669	-0.690045	0.632008	no change	5	8	21	15	16	0
StLNC1670	0.478056	0.586878	no change	3	7	13	4	3	3
StLNC1671	-1.48982	0.133265	no change	5	5	3	12	10	4
StLNC1672	-0.858575	0.483648	no change	15	89	14	16	21	117
StLNC1673	-6.64401	0.0895938	no change	0	0	0	37	0	0
StLNC1674	0.121322	0.940944	no change	0	22	25	12	10	1
StLNC1675	-0.39257	0.533631	no change	15	14	48	22	22	17
StLNC1677	1.27483	0.531346	no change	5	13	2	6	0	0
StLNC1678	-5.98866	0.126388	no change	0	0	0	0	22	0
StLNC1680	2.91413	0.078851	no change	104	129	15	0	6	22
StLNC1681	0.0372941	0.92059	no change	44	69	102	44	36	55
StLNC1682	-5.6105	0.114609	no change	0	0	0	1	16	0
StLNC1685	0.98818	0.504408	no change	50	52	58	0	17	42
StLNC1687	-1.18962	0.538265	no change	84	0	69	28	15	249
StLNC1688	4.88252	0.0268143	up	3	2	26	0	0	0
StLNC1690	-1.04831	0.551926	no change	84	28	0	58	69	96
StLNC1691	-6.49754	0.0355263	down	0	0	0	18	0	17
StLNC1692	-0.766613	0.646948	no change	2	1	35	2	26	2
StLNC1694	1.30575	0.501621	no change	5	20	9	9	0	0
StLNC1695	-0.68853	0.767195	no change	0	61	1	4	56	1
StLNC1696	0.940079	0.72411	no change	0	8	14	6	0	0
StLNC1697	-2.5011	0.351864	no change	0	32	22	0	1	190
StLNC1699	0.444867	0.751755	no change	10	32	37	17	17	0
StLNC1700	-0.0783742	0.912052	no change	69	67	101	60	22	94
StLNC1701	-2.5288	0.00917559	down	3	30	29	92	85	27
StLNC1703	-0.271208	0.723983	no change	8	12	26	8	6	21
StLNC1704	-1.22034	0.338876	no change	1	3	4	2	1	9
StLNC1705	1.39146	0.407691	no change	3	183	332	74	26	1
StLNC1706	2.71768	0.0241005	up	26	37	97	0	4	11
StLNC1709	5.2072	0.183627	no change	0	31	0	0	0	0
StLNC1710	0.111927	0.94889	no change	2	5	46	4	0	22
StLNC1711	9.52686	1.2e-05	up	6	293	465	0	0	0
StLNC1712	-0.527206	0.781996	no change	0	101	29	23	3	96
StLNC1714	1.34987	0.260549	no change	15	30	30	16	2	1
StLNC1716	-1.04724	0.528676	no change	4	24	0	6	25	9
StLNC1717	7.0906	1.73e-05	up	23	18	87	0	0	0
StLNC1718	0.54507	0.170711	no change	74	105	196	50	42	71
StLNC1719	0.873972	0.677558	no change	0	29	35	0	4	16
StLNC1722	3.7084	0.094478	no change	1	2	53	2	0	0
StLNC1723	-1.8726	0.162796	no change	5	7	0	15	9	11
StLNC1728	0.0664222	0.905575	no change	10	23	28	12	10	15
StLNC1730	-0.399848	0.598122	no change	8	9	12	5	7	14
StLNC1731	0.684193	0.642121	no change	15	49	33	27	11	0
StLNC1732	-0.0400228	0.964353	no change	15	70	26	18	14	46
StLNC1733	0.522389	0.22045	no change	65	129	218	57	66	51
StLNC1738	0.839915	0.239395	no change	237	470	589	233	157	60
StLNC1740	0.545874	0.819128	no change	4	66	64	0	0	57
StLNC1742	-3.11263	0.417566	no change	0	3	0	17	0	0
StLNC1744	-1.67736	0.0600648	no change	114	271	326	760	514	108
StLNC1745	6.35012	0.00364839	up	41	67	1	1	0	0
StLNC1747	0.824179	0.500091	no change	161	1470	595	28	418	341
StLNC1750	-6.82688	0.0810464	no change	0	0	0	42	0	0
StLNC1751	-0.439915	0.781062	no change	11	32	71	44	40	0
StLNC1754	-3.15149	0.408749	no change	0	0	3	0	0	14
StLNC1755	-0.0909887	0.92969	no change	72	43	36	20	81	22
StLNC1758	-0.152471	0.792707	no change	8	16	23	11	9	13
StLNC1759	0.683736	0.185689	no change	427	839	1540	406	400	231
StLNC1761	0.373908	0.920634	no change	0	0	45	0	0	17
StLNC1763	6.19577	0.00358824	up	3	8	71	0	0	0
StLNC1764	-0.173031	0.820931	no change	23	17	40	8	25	27
StLNC1765	-6.46215	0.0385365	down	0	0	0	0	11	23
StLNC1766	7.87419	0.0124125	up	0	73	182	0	0	0
StLNC1768	-1.69279	0.429366	no change	0	14	24	0	16	52
StLNC1769	-2.54345	0.131496	no change	1	1	1	0	6	6
StLNC1771	-0.98099	0.637701	no change	0	15	24	16	23	0
StLNC1772	-1.20343	0.114756	no change	34	81	55	109	110	36
StLNC1774	0.485495	0.782277	no change	0	55	13	22	3	5
StLNC1775	-6.57407	0.0930498	no change	0	0	0	0	33	0
StLNC1776	-0.854141	0.543085	no change	7	0	29	16	10	11
StLNC1777	0.168746	0.953329	no change	7	0	19	14	0	0
StLNC1778	-0.683578	0.517483	no change	3	11	16	17	9	2
StLNC1779	3.0217	0.268446	no change	27	0	28	5	0	0
StLNC1780	2.07345	0.00356833	up	34	28	47	5	4	9
StLNC1781	-0.111652	0.913487	no change	22	39	79	44	40	4
StLNC1782	-0.91292	0.756875	no change	0	0	14	11	0	1
StLNC1783	0.606484	0.417316	no change	12	45	35	14	6	19
StLNC1784	-0.0182604	0.986945	no change	4	1	11	3	3	4
StLNC1785	-1.22138	0.0787421	no change	5	11	21	10	22	20
StLNC1786	0.773795	0.452611	no change	16	8	9	2	6	7
StLNC1793	-0.589563	0.782175	no change	5	3	5	14	0	0
StLNC1794	-2.73043	0.470752	no change	0	6	0	26	0	0
StLNC1795	0.775304	0.778973	no change	0	15	20	0	0	12
StLNC1797	-5.92148	0.13075	no change	0	0	0	0	21	0
StLNC1798	-0.334927	0.751437	no change	20	136	16	43	48	58
StLNC1799	-0.188008	0.888211	no change	3	9	6	5	0	9
StLNC1800	1.83716	0.0614486	no change	11	6	36	3	2	4
StLNC1803	1.6227	0.298645	no change	2	2	20	2	2	0
StLNC1805	-5.46614	0.00710789	down	0	0	0	3	10	3
StLNC1806	-0.416296	0.754566	no change	2	3	4	4	0	4
StLNC1808	-0.621672	0.10213	no change	169	306	400	256	217	400
StLNC1809	-0.669021	0.18262	no change	66	122	157	139	130	76
StLNC1812	0.825878	0.138582	no change	27	43	110	17	23	20
StLNC1814	0.158027	0.747182	no change	42	101	126	67	40	43
StLNC1815	0.810147	0.669845	no change	7	5	9	0	0	9
StLNC1816	0.331047	0.614102	no change	46	51	95	24	18	60
StLNC1817	0.605587	0.872736	no change	0	17	0	0	0	8
StLNC1819	-0.64946	0.840621	no change	0	66	23	0	78	0
StLNC1820	-0.461119	0.581975	no change	3	10	29	13	11	8
StLNC1821	0.978883	0.114855	no change	15	31	44	8	6	15
StLNC1824	-4.06993	0.018777	down	0	1	1	1	4	17
StLNC1825	-0.324312	0.648186	no change	10	14	14	16	8	8
StLNC1827	10.7456	0.00174717	up	0	1150	429	0	0	0
StLNC1830	-0.999436	0.401784	no change	11	16	1	12	18	14
StLNC1831	-2.33607	0.158199	no change	3	2	4	0	5	28
StLNC1834	1.63453	0.587866	no change	28	6	0	0	10	0
StLNC1835	0.412281	0.579723	no change	10	11	30	5	6	13
StLNC1836	0.538516	0.200729	no change	55	102	152	55	32	47
StLNC1838	0.128766	0.873215	no change	11	21	15	7	5	18
StLNC1839	2.67345	0.0953383	no change	5	4	10	0	0	2
StLNC1841	-6.34142	0.10533	no change	0	0	0	30	0	0
StLNC1842	2.62945	0.0574615	no change	147	332	299	74	5	2
StLNC1843	0.115404	0.917936	no change	41	78	102	3	56	72
StLNC1844	-0.0963064	0.906352	no change	6	6	11	8	4	4
StLNC1845	-0.129457	0.864067	no change	7	11	23	9	13	5
StLNC1847	-1.32425	0.580804	no change	34	0	65	45	0	128
StLNC1848	0.859884	0.160446	no change	14	49	47	13	10	15
StLNC1849	1.01038	0.740958	no change	0	22	112	0	0	35
StLNC1854	-5.77694	0.140536	no change	0	0	0	0	19	0
StLNC1857	5.48504	0.0464584	up	108	0	116	0	0	4
StLNC1858	0.329453	0.657476	no change	10	11	35	5	10	12
StLNC1859	0.270925	0.850271	no change	6	13	15	15	0	3
StLNC1860	4.21598	9.27e-06	up	97	319	993	4	17	20
StLNC1863	0.78702	0.316775	no change	14	9	23	5	4	9
StLNC1864	1.7895	0.489741	no change	0	14	15	0	0	5
StLNC1865	-0.249709	0.655913	no change	66	116	179	121	92	52
StLNC1866	-0.3118	0.762288	no change	144	98	68	24	109	179
StLNC1867	-0.0783868	0.973003	no change	36	0	63	35	32	0
StLNC1868	1.34698	0.336607	no change	19	20	19	13	3	0
StLNC1870	-0.435858	0.878695	no change	5	0	11	0	0	15
StLNC1872	-1.80755	0.0323752	down	40	31	56	100	160	35
StLNC1873	-0.206273	0.754137	no change	155	134	339	170	69	239
StLNC1874	0.928435	0.73237	no change	0	11	18	8	0	0
StLNC1876	1.05515	0.78051	no change	12	0	0	6	0	0
StLNC1877	6.11784	0.0582838	no change	27	0	22	0	0	0
StLNC1878	-0.983196	0.693015	no change	0	42	1	25	0	33
StLNC1879	-0.341356	0.637291	no change	6	17	16	7	8	17
StLNC1880	-0.195391	0.886768	no change	6	3	8	5	0	9
StLNC1881	1.93971	0.0234457	up	84	209	96	8	32	30
StLNC1882	-1.06884	0.0703065	no change	69	69	65	110	70	131
StLNC1884	5.02188	0.0715365	no change	0	6	145	0	2	0
StLNC1885	-0.429913	0.877278	no change	0	7	3	8	0	0
StLNC1886	-2.29803	0.263644	no change	3	2	0	0	11	10
StLNC1887	0.348152	0.582307	no change	36	56	53	18	17	44
StLNC1889	0.335116	0.870323	no change	0	5	21	8	2	0
StLNC1891	0.129492	0.861264	no change	8	11	18	4	6	12
StLNC1892	-1.74919	0.307822	no change	9	3	3	14	26	0
StLNC1894	1.04705	0.0175805	up	60	155	206	43	33	50
StLNC1895	4.50152	0.00155832	up	7	17	60	1	1	0
StLNC1898	-2.96825	0.240945	no change	0	0	5	10	8	0
StLNC1899	-0.929121	0.252769	no change	11	16	44	13	17	53
StLNC1900	3.26547	0.00369941	up	22	63	127	7	0	6
StLNC1901	8.61871	3.25e-10	up	67	103	175	0	0	0
StLNC1902	1.74807	0.000473038	up	231	531	674	124	74	67
StLNC1903	-1.40841	0.634034	no change	0	24	0	17	0	27
StLNC1904	-0.846391	0.138576	no change	10	19	41	23	30	22
StLNC1905	3.90563	0.00196854	up	50	137	42	0	4	7
StLNC1906	-0.744246	0.276017	no change	7	8	17	7	13	14
StLNC1907	0.320193	0.730285	no change	6	14	14	2	4	12
StLNC1910	0.579436	0.740563	no change	114	134	51	0	33	130
StLNC1911	-0.108712	0.782397	no change	2548	3062	5123	2647	1739	3267
StLNC1912	-0.478259	0.549139	no change	7	13	23	7	7	24
StLNC1913	0.0548068	0.93809	no change	5	16	19	6	7	11
StLNC1914	1.06039	0.566104	no change	1	1	22	1	0	5
StLNC1917	0.645607	0.509746	no change	10	20	37	18	2	6
StLNC1918	0.110525	0.949118	no change	2	14	4	0	1	12
StLNC1923	-4.01412	0.290835	no change	0	0	2	0	16	0
StLNC1925	5.24996	8.34e-05	up	112	300	506	12	2	0
StLNC1931	-7.29256	0.0622545	no change	0	0	0	58	0	0
StLNC1933	0.341966	0.904997	no change	6	8	0	9	0	0
StLNC1935	0.105815	0.957992	no change	0	8	25	10	5	0
StLNC1937	1.79702	0.0729573	no change	6	6	23	2	2	2
StLNC1940	6.41324	0.0374682	up	0	34	55	0	0	0
StLNC1941	0.0218783	0.986521	no change	9	12	14	12	0	12
StLNC1944	0.492023	0.815723	no change	0	27	19	0	14	4
StLNC1945	5.78944	0.0844473	no change	0	43	5	0	0	0
StLNC1948	-0.0857424	0.96003	no change	2	1	9	0	6	1
StLNC1949	-0.54469	0.297923	no change	14	28	47	23	20	38
StLNC1950	-1.27318	0.271869	no change	0	11	18	11	14	13
StLNC1951	4.85706	2.57e-12	up	215	404	1278	16	8	13
StLNC1952	0.470266	0.282058	no change	35	72	88	32	31	26
StLNC1953	-0.222393	0.756532	no change	37	72	39	54	41	24
StLNC1954	-0.232032	0.690244	no change	17	22	28	12	22	18
StLNC1955	-0.363053	0.648513	no change	29	17	29	12	20	39
StLNC1956	-0.230812	0.902536	no change	0	8	12	8	0	5
StLNC1957	-2.14231	0.251263	no change	0	2	4	8	6	0
StLNC1958	0.148942	0.753285	no change	26	64	68	34	23	34
StLNC1959	0.518198	0.421122	no change	15	16	48	11	8	15
StLNC1960	0.135583	0.931427	no change	4	8	2	0	7	2
StLNC1964	0.736233	0.331803	no change	13	23	31	3	9	14
StLNC1967	-0.670463	0.490032	no change	41	38	102	12	48	128
StLNC1971	2.02993	0.0896557	no change	106	22	72	25	10	3
StLNC1972	-5.89922	0.0598963	no change	0	0	0	13	0	10
StLNC1973	-0.586221	0.620284	no change	0	8	14	6	6	6
StLNC1974	-2.10019	0.34963	no change	0	1	6	14	0	1
StLNC1975	0.470649	0.271305	no change	28	58	74	24	24	25
StLNC1976	6.2296	0.111232	no change	0	63	0	0	0	0
StLNC1977	0.569543	0.645308	no change	6	11	11	4	0	9
StLNC1978	0.215891	0.65999	no change	22	25	49	18	16	19
StLNC1979	-0.851147	0.554315	no change	6	0	10	11	5	3
StLNC1981	-7.02178	0.0726828	no change	0	0	0	0	45	0
StLNC1983	-0.798398	0.360841	no change	3	14	8	14	6	8
StLNC1984	0.0749367	0.97858	no change	0	10	13	0	11	0
StLNC1985	-0.250271	0.849851	no change	24	43	4	29	3	36
StLNC1986	0.224307	0.750669	no change	12	28	25	8	8	21
StLNC1987	-2.95795	0.103384	no change	0	4	0	2	8	11
StLNC1989	1.55691	0.679373	no change	0	37	0	0	0	9
StLNC1995	0.17276	0.887884	no change	1	33	37	4	17	14
StLNC1996	-0.103361	0.859678	no change	9	15	25	13	10	10
StLNC1998	1.94501	0.00383301	up	134	358	563	82	51	28
StLNC1999	0.104272	0.952125	no change	2	7	1	1	0	6
StLNC2001	-0.679699	0.332597	no change	6	17	29	20	19	10
StLNC2002	0.982148	0.198744	no change	16	22	25	9	9	3
StLNC2003	0.232772	0.871085	no change	0	9	13	2	6	2
StLNC2004	-0.546899	0.201728	no change	78	84	130	112	86	86
StLNC2007	0.137334	0.854893	no change	65	130	282	121	28	112
StLNC2008	9.17068	9.73e-05	up	1	183	1113	1	0	0
StLNC2009	-0.166531	0.785055	no change	9	16	22	12	7	15
StLNC2010	1.17723	0.00199737	up	547	1231	1793	366	312	286
StLNC2011	-0.701891	0.330589	no change	17	12	22	11	17	30
StLNC2012	-1.15819	0.225021	no change	15	21	10	12	45	16
StLNC2013	0.319424	0.918879	no change	27	0	0	18	0	5
StLNC2014	-0.404304	0.864352	no change	0	73	130	0	53	91
StLNC2015	-0.143664	0.897881	no change	2	2	12	5	3	2
StLNC2016	-1.57167	0.466352	no change	1	0	7	2	10	0
StLNC2018	0.396814	0.765559	no change	2	7	6	4	3	0
StLNC2019	0.57969	0.436428	no change	7	19	15	6	4	8
StLNC2021	-0.829811	0.280541	no change	19	16	14	22	27	14
StLNC2022	0.337364	0.824949	no change	31	51	86	33	46	0
StLNC2023	5.15227	0.00793024	up	1	31	37	0	0	1
StLNC2025	0.325164	0.916054	no change	18	0	3	16	0	0
StLNC2026	0.665538	0.0794736	no change	90	152	189	52	48	78
StLNC2027	0.817507	0.260251	no change	65	134	214	78	43	20
StLNC2028	-4.31548	0.0254093	down	0	0	1	1	9	4
StLNC2029	5.5596	0.155493	no change	0	0	58	0	0	0
StLNC2031	-0.631567	0.82387	no change	0	0	25	11	0	7
StLNC2032	-5.38741	0.093861	no change	0	0	0	0	6	10
StLNC2033	1.6333	0.251658	no change	32	46	50	23	0	5
StLNC2034	-0.0750894	0.968311	no change	25	0	8	9	1	23
StLNC2035	-0.145361	0.861698	no change	8	55	60	29	34	15
StLNC2036	0.758856	0.385953	no change	6	10	9	3	2	5
StLNC2037	-0.910854	0.729504	no change	0	1	43	1	0	40
StLNC2038	-0.921072	0.364112	no change	5	34	28	7	21	51
StLNC2040	-0.552126	0.85832	no change	0	0	40	24	2	0
StLNC2041	3.69826	0.335816	no change	0	0	31	0	0	1
StLNC2043	-1.20989	0.555894	no change	5	0	11	6	0	19
StLNC2044	1.59602	0.0977403	no change	71	188	47	34	27	10
StLNC2047	0.695436	0.59717	no change	112	728	1030	186	10	496
StLNC2048	1.58519	0.24342	no change	28	58	83	10	0	27
StLNC2049	-1.08762	0.425041	no change	3	5	5	9	0	10
StLNC2050	-0.0769258	0.890998	no change	11	16	23	12	11	11
StLNC2052	-0.463843	0.902567	no change	6	0	0	0	8	0
StLNC2054	3.49069	0.0114613	up	10	53	81	0	6	1
StLNC2056	-0.541385	0.24	no change	80	94	247	121	137	114
StLNC2061	-0.39453	0.916838	no change	0	0	17	0	0	11
StLNC2063	-0.195485	0.663769	no change	26	61	77	46	30	42
StLNC2064	-2.86485	0.452555	no change	0	4	0	0	0	21
StLNC2065	0.603613	0.65737	no change	0	10	22	4	4	3
StLNC2066	-6.24188	0.110965	no change	0	0	0	28	0	0
StLNC2068	0.8761	0.459744	no change	1	9	8	2	1	3
StLNC2069	-5.43444	0.165993	no change	0	0	0	16	0	0
StLNC2070	0.640917	0.518181	no change	18	4	19	8	5	6
StLNC2071	0.933387	0.289367	no change	126	434	503	104	28	220
StLNC2072	-0.133239	0.848245	no change	214	216	418	121	116	394
StLNC2074	-1.14603	0.0243002	down	22	19	33	39	33	38
StLNC2076	0.310151	0.666552	no change	12	9	18	8	7	6
StLNC2077	1.53002	0.684698	no change	0	0	52	8	0	0
StLNC2078	0.269399	0.691188	no change	30	49	54	14	16	45
StLNC2079	0.237464	0.880682	no change	11	5	7	0	2	14
StLNC2081	-3.13334	0.229575	no change	0	4	0	0	8	16
StLNC2082	-1.42479	0.129623	no change	53	16	28	74	88	44
StLNC2087	-6.38754	0.102798	no change	0	0	0	0	29	0
StLNC2088	5.41839	0.00791897	up	59	100	3	3	0	0
StLNC2090	0.301035	0.56535	no change	18	32	34	14	12	19
StLNC2091	3.37573	0.000148232	up	285	502	1303	74	29	12
StLNC2092	-0.0624568	0.937777	no change	20	57	70	18	15	65
StLNC2094	0.417701	0.454153	no change	35	51	48	17	28	23
StLNC2096	0.288421	0.830055	no change	0	16	16	5	3	7
StLNC2098	-1.85779	0.089425	no change	24	17	57	85	8	142
StLNC2101	-0.851148	0.393218	no change	1	6	11	3	6	10
StLNC2102	-0.0863797	0.956068	no change	30	32	40	16	0	64
StLNC2105	-1.18029	0.500422	no change	0	19	5	10	21	1
StLNC2106	3.67362	0.154462	no change	0	43	23	3	0	0
StLNC2107	-0.482083	0.689357	no change	6	2	8	9	5	1
StLNC2110	0.29615	0.860199	no change	69	64	252	0	115	67
StLNC2112	-0.339808	0.6335	no change	12	13	25	12	20	8
StLNC2114	-0.721561	0.394595	no change	14	43	26	42	35	11
StLNC2116	-0.183213	0.961079	no change	0	23	0	17	0	0
StLNC2117	0.55378	0.536203	no change	29	32	14	10	8	22
StLNC2118	1.62795	0.215315	no change	6	3	9	2	0	2
StLNC2120	-1.5484	0.377711	no change	8	0	4	3	2	26
StLNC2121	-2.15404	0.426095	no change	0	0	13	0	11	16
StLNC2123	-0.0960711	0.967128	no change	0	19	69	0	4	46
StLNC2124	-0.00894208	0.987834	no change	142	309	494	235	225	107
StLNC2125	-0.155544	0.743078	no change	38	72	113	34	55	66
StLNC2126	1.39824	0.563377	no change	23	0	76	1	0	23
StLNC2127	-0.420669	0.831761	no change	2	0	9	4	4	0
StLNC2128	-2.07598	0.418885	no change	0	0	6	0	6	6
StLNC2129	-0.109994	0.893149	no change	27	43	77	11	24	67
StLNC2131	0.668056	0.720572	no change	4	6	5	0	0	7
StLNC2133	-0.776243	0.23294	no change	8	21	16	21	16	13
StLNC2134	-0.225087	0.719464	no change	31	72	80	23	42	73
StLNC2139	-7.20243	0.0655781	no change	0	0	0	0	51	0
StLNC2141	-1.25292	0.739733	no change	0	0	15	0	15	0
StLNC2143	-1.18449	0.464031	no change	3	1	3	0	8	3
StLNC2144	0.566001	0.849557	no change	0	1	25	8	0	0
StLNC2146	0.654614	0.808141	no change	0	10	10	7	0	0
StLNC2148	-0.178739	0.716225	no change	34	93	136	51	49	82
StLNC2149	1.47556	0.223681	no change	39	159	143	58	2	16
StLNC2151	-3.90761	0.165012	no change	0	9	0	53	33	0
StLNC2152	-0.0978574	0.94927	no change	14	0	13	3	8	11
StLNC2154	0.528782	0.535757	no change	16	10	33	4	7	16
StLNC2155	0.267352	0.646409	no change	109	290	492	179	159	93
StLNC2158	0.650636	0.629569	no change	10	24	13	0	7	14
StLNC2159	0.995928	0.126418	no change	14	41	73	16	8	14
StLNC2161	-5.79456	0.068606	no change	0	0	0	12	8	0
StLNC2165	-0.422525	0.910311	no change	0	0	35	0	0	23
StLNC2166	-0.00143278	0.999604	no change	4	9	0	10	0	0
StLNC2170	-7.96884	0.0204528	down	0	0	0	4	83	0
StLNC2171	-1.12906	0.388876	no change	0	7	5	5	2	9
StLNC2172	-1.18364	0.420048	no change	0	36	42	23	54	17
StLNC2173	-0.494466	0.814738	no change	0	20	11	0	5	22
StLNC2175	-1.45684	0.0541876	no change	3	15	21	13	20	31
StLNC2177	-0.311617	0.610227	no change	20	25	35	31	20	14
StLNC2180	-0.423259	0.580711	no change	22	48	71	45	54	14
StLNC2186	-5.48709	0.0998045	no change	0	0	0	0	13	3
StLNC2188	-5.53758	0.0854121	no change	0	0	0	0	11	6
StLNC2190	-5.66075	0.016223	down	0	1	14	0	179	181
StLNC2193	2.98019	0.0365133	up	7	11	18	0	0	3
StLNC2195	1.92593	0.238389	no change	2	23	3	3	0	2
StLNC2200	0.301684	0.878034	no change	3	0	10	3	3	0
StLNC2201	0.685446	0.458713	no change	33	27	17	21	7	9
StLNC2202	-2.10539	0.0803295	no change	0	9	4	10	7	18
StLNC2205	3.85233	0.134922	no change	11	0	9	0	1	0
StLNC2209	1.8807	0.442586	no change	0	14	303	24	14	0
StLNC2210	-5.75641	0.14197	no change	0	0	0	20	0	0
StLNC2211	0.560904	0.545467	no change	109	1081	610	118	245	394
StLNC2215	0.480684	0.399643	no change	94	170	234	113	65	46
StLNC2217	-0.0154522	0.992803	no change	0	55	138	60	6	35
StLNC2218	-0.166953	0.911341	no change	6	2	18	0	7	11
StLNC2219	2.04547	0.201218	no change	6	6	12	0	0	4
StLNC2221	-0.312932	0.649711	no change	63	100	130	45	46	154
StLNC2224	-0.24156	0.867945	no change	48	3	157	97	38	7
StLNC2225	-6.88741	0.0783685	no change	0	0	0	0	41	0
StLNC2226	5.24971	1.47e-07	up	178	249	1573	3	11	14
StLNC2228	5.40257	0.167593	no change	0	0	52	0	0	0
StLNC2231	5.45407	0.0145066	up	1	9	38	0	0	0
StLNC2232	-0.31288	0.821444	no change	0	26	42	9	18	18
StLNC2233	0.96453	0.607804	no change	0	10	6	2	0	3
StLNC2234	12.4553	2.21e-16	up	512	1744	3154	0	0	0
StLNC2237	2.74485	0.185186	no change	3	59	12	7	0	0
StLNC2238	-0.419853	0.639473	no change	5	8	6	6	8	3
StLNC2245	-0.190163	0.752754	no change	21	27	43	12	23	33
StLNC2247	5.13043	0.102938	no change	0	15	21	0	0	0
StLNC2248	-1.06076	0.777363	no change	12	0	0	26	0	0
StLNC2249	3.12743	6.49e-05	up	37	37	134	5	6	3
StLNC2250	-0.914526	0.164053	no change	13	24	25	29	32	14
StLNC2251	-0.643982	0.516101	no change	17	12	28	32	22	4
StLNC2253	0.0563845	0.970046	no change	25	35	77	49	0	34
StLNC2254	4.91554	0.135655	no change	6	0	23	0	0	0
StLNC2255	-1.17693	0.110403	no change	45	124	156	201	179	59
StLNC2257	0.772614	0.0908885	no change	120	240	265	77	95	61
StLNC2258	-1.1274	0.407769	no change	0	12	8	12	10	3
StLNC2259	-0.898468	0.747256	no change	0	7	5	0	0	14
StLNC2261	0.854416	0.709592	no change	0	1	39	0	6	4
StLNC2262	-5.20227	0.185155	no change	0	0	0	0	0	15
StLNC2264	-0.167506	0.952836	no change	0	4	18	12	0	0
StLNC2265	-0.376165	0.64072	no change	6	6	9	8	6	4
StLNC2266	-0.363945	0.852307	no change	0	9	17	12	0	6
StLNC2268	-2.06582	0.320841	no change	5	0	0	13	2	6
StLNC2275	10.1324	1.73e-10	up	102	257	765	0	0	0
StLNC2278	-1.40457	0.0358792	down	20	16	38	27	32	72
StLNC2279	0.00585157	0.995019	no change	14	13	30	4	7	27
StLNC2281	-0.52116	0.449597	no change	7	14	15	8	8	18
StLNC2283	5.38766	0.00254963	up	4	10	27	0	0	0
StLNC2284	-1.6631	0.0173683	down	5	7	9	18	15	10
StLNC2285	-0.076344	0.926316	no change	11	42	27	15	8	33
StLNC2286	-1.44143	0.539121	no change	8	0	1	18	5	0
StLNC2287	6.91324	0.00273409	up	2	87	16	0	0	0
StLNC2288	-0.535595	0.369747	no change	15	17	40	30	18	17
StLNC2289	0.631561	0.655566	no change	16	33	55	0	26	14
StLNC2290	-2.14478	0.0283198	down	9	6	6	43	10	16
StLNC2291	-0.475843	0.79427	no change	45	156	26	62	0	177
StLNC2292	-0.324244	0.577661	no change	108	209	342	222	183	93
StLNC2293	-5.46487	0.163598	no change	0	0	0	0	0	18
StLNC2295	3.29591	0.151653	no change	33	0	6	1	0	3
StLNC2297	0.227614	0.666989	no change	2317	7383	7498	2373	2387	4503
StLNC2299	0.637979	0.865214	no change	0	0	42	12	0	0
StLNC2300	-3.95864	0.0396477	down	2	0	0	4	3	22
StLNC2301	-1.76078	0.28574	no change	13	31	31	83	73	0
StLNC2302	6.04631	7.12e-05	up	13	17	26	0	0	0
StLNC2305	3.39999	0.001418	up	22	50	18	3	2	1
StLNC2306	0.115216	0.957518	no change	0	6	20	1	0	12
StLNC2307	0.314044	0.576435	no change	1922	6534	6548	1806	2012	3763
StLNC2310	4.00845	0.000273915	up	27	27	43	0	3	1
StLNC2312	-0.158195	0.93243	no change	0	7	8	5	4	0
StLNC2313	-0.303258	0.833182	no change	0	8	39	7	14	7
StLNC2315	-0.0328182	0.993059	no change	0	15	0	0	0	11
StLNC2316	-0.852892	0.57447	no change	0	82	96	52	45	81
StLNC2317	-1.53285	0.480703	no change	4	11	0	23	9	0
StLNC2318	6.91399	0.0769867	no change	63	0	0	0	0	0
StLNC2321	-3.09215	0.414342	no change	0	0	8	0	0	34
StLNC2323	4.35004	0.0921213	no change	22	0	40	2	0	0
StLNC2324	-0.31335	0.702083	no change	4	6	10	5	3	8
StLNC2327	0.353595	0.779039	no change	4	12	9	7	0	6
StLNC2331	0.982436	0.304595	no change	4	11	21	4	1	6
StLNC2332	1.22549	0.551371	no change	9	6	2	6	0	0
StLNC2334	-6.69507	0.0301793	down	0	0	0	22	0	18
StLNC2335	4.74279	0.0101221	up	4	5	16	0	0	0
StLNC2339	-5.10674	0.183651	no change	0	2	0	47	0	0
StLNC2341	0.25495	0.915585	no change	11	34	0	26	2	0
StLNC2342	0.389242	0.423235	no change	20	37	57	17	14	24
StLNC2344	0.432412	0.495166	no change	39	120	187	31	69	50
StLNC2346	4.21976	2.12e-11	up	341	494	1812	25	29	26
StLNC2347	-1.24023	0.275616	no change	0	7	15	11	8	9
StLNC2349	5.9529	0.12812	no change	0	52	0	0	0	0
StLNC2350	0.124262	0.851005	no change	39	116	71	39	29	72
StLNC2351	-0.481551	0.86332	no change	0	0	18	6	5	0
StLNC2352	9.49893	3.13e-12	up	138	206	264	0	0	0
StLNC2355	0.764103	0.712159	no change	5	11	0	3	4	0
StLNC2357	-1.7757	0.426581	no change	0	19	0	14	2	29
StLNC2358	3.60008	5.7e-06	up	24	102	170	5	4	5
StLNC2359	2.39979	0.167788	no change	4	12	32	5	0	0
StLNC2360	-0.667543	0.655879	no change	1	7	2	1	8	1
StLNC2361	-0.993467	0.69316	no change	0	77	263	165	156	0
StLNC2362	-6.18503	0.00202033	down	0	0	0	2	14	11
StLNC2363	1.42101	0.606165	no change	0	24	19	9	0	0
StLNC2365	1.39252	0.653384	no change	35	61	0	0	0	32
StLNC2366	-0.62083	0.769495	no change	0	24	28	23	19	0
StLNC2367	-3.64668	0.170935	no change	0	5	0	24	16	0
StLNC2370	1.32954	0.283125	no change	6	15	39	6	0	8
StLNC2371	0.493775	0.790841	no change	0	9	11	5	0	3
StLNC2373	-1.04439	0.780361	no change	0	25	0	0	0	37
StLNC2380	-3.1061	0.408384	no change	0	0	16	0	0	68
StLNC2383	-1.0518	0.13096	no change	4	19	18	16	13	24
StLNC2384	1.04289	0.132869	no change	14	17	42	10	4	8
StLNC2385	1.27063	0.435008	no change	1	14	15	6	1	0
StLNC2387	0.061038	0.975918	no change	7	0	6	3	0	7
StLNC2388	-0.845109	0.206323	no change	13	33	43	43	37	17
StLNC2392	-0.570791	0.756867	no change	373	267	45	740	118	1
StLNC2396	-1.32101	0.358907	no change	0	3	14	10	9	2
StLNC2397	-0.489916	0.763947	no change	1	6	21	14	6	0
StLNC2398	-1.4623	0.101874	no change	8	42	38	23	86	34
StLNC2399	-0.708929	0.302991	no change	19	53	95	65	64	28
StLNC2401	-2.33827	0.369331	no change	0	0	8	0	9	10
StLNC2402	3.04926	0.195121	no change	28	329	28	0	0	34
StLNC2405	-8.21405	0.0104097	down	0	0	0	21	0	98
StLNC2407	-0.709593	0.345186	no change	5	5	10	8	7	6
StLNC2409	0.0310685	0.963404	no change	40	52	42	37	36	18
StLNC2410	6.77707	0.000363775	up	5	60	35	0	0	0
StLNC2411	1.36124	0.239179	no change	19	22	7	5	1	9
StLNC2412	7.0394	5.37e-05	up	123	204	11	1	1	0
StLNC2413	0.679866	0.166958	no change	32	83	79	25	21	32
StLNC2415	-0.0667506	0.917587	no change	25	36	34	13	20	36
StLNC2419	8.08689	4.71e-07	up	194	68	662	2	0	0
StLNC2421	0.04226	0.984624	no change	13	26	0	15	0	16
StLNC2422	-0.0414264	0.93819	no change	52	84	60	43	42	56
StLNC2423	-6.57407	0.0930498	no change	0	0	0	0	33	0
StLNC2424	4.92344	0.0146443	up	2	16	9	0	0	0
StLNC2426	0.490465	0.400119	no change	51	35	78	31	23	25
StLNC2427	0.610329	0.667349	no change	1	7	8	3	3	0
StLNC2430	-0.244808	0.66902	no change	118	228	180	181	142	92
StLNC2431	-0.67894	0.428461	no change	5	8	13	4	6	17
StLNC2434	0.120215	0.934422	no change	8	26	45	29	0	14
StLNC2440	6.77328	0.000196532	up	20	51	13	0	0	0
StLNC2441	0.263037	0.878462	no change	171	8	2	41	25	95
StLNC2442	0.521464	0.533009	no change	14	8	33	12	7	5
StLNC2443	-6.77491	0.000174468	down	0	0	0	20	15	5
StLNC2447	-0.228318	0.908294	no change	0	2	11	2	0	6
StLNC2450	4.2221	0.000191	up	1457	1313	1857	23	9	153
StLNC2451	-1.27623	0.0930518	no change	5	16	10	11	13	26
StLNC2452	-8.18545	9.01e-07	down	0	0	0	14	41	55
StLNC2454	10.8998	2.05e-13	up	202	752	774	0	0	0
StLNC2457	1.44318	0.0718842	no change	17	41	20	5	5	10
StLNC2458	-0.991303	0.25752	no change	6	6	14	13	15	4
StLNC2460	4.6874	0.14438	no change	0	12	14	0	0	0
StLNC2462	-0.267931	0.489395	no change	103	187	229	107	117	183
StLNC2464	5.98037	0.126359	no change	0	53	0	0	0	0
StLNC2466	-0.800501	0.692481	no change	5	0	14	0	11	9
StLNC2469	-0.574447	0.793075	no change	11	14	0	0	9	23
StLNC2470	-0.259051	0.734388	no change	55	94	66	86	21	75
StLNC2471	-0.038736	0.978145	no change	5	9	6	3	0	12
StLNC2472	7.80863	2.95e-07	up	26	54	135	0	0	0
StLNC2475	0.455559	0.742422	no change	16	10	160	57	6	6
StLNC2476	0.689045	0.634171	no change	1	313	211	68	56	63
StLNC2477	0.689538	0.498215	no change	7	4	25	5	6	2
StLNC2478	-6.65902	0.0888658	no change	0	0	0	0	35	0
StLNC2480	-1.14954	0.534543	no change	1	1	71	22	48	1
StLNC2481	-6.03556	0.0651878	no change	0	0	0	20	4	0
StLNC2482	-0.914226	0.635202	no change	0	4	6	2	0	9
StLNC2483	4.8367	0.217129	no change	15	0	0	0	0	0
StLNC2484	-1.27635	0.261758	no change	0	4	7	4	6	5
StLNC2486	4.65967	0.234618	no change	0	0	31	0	0	0
StLNC2487	-2.69393	0.0458521	down	0	12	6	34	27	7
StLNC2489	0.417372	0.407513	no change	295	864	1092	254	294	492
StLNC2493	-1.3753	0.714812	no change	0	12	0	0	19	0
StLNC2494	-6.15148	0.00127571	down	0	0	0	14	9	3
StLNC2495	4.77702	0.222916	no change	0	23	0	0	0	0
StLNC2496	2.73	0.115084	no change	5	18	40	0	5	0
StLNC2501	-0.584428	0.572181	no change	3	9	8	13	3	3
StLNC2503	0.420077	0.835926	no change	10	1	1	1	7	0
StLNC2504	0.229322	0.729512	no change	10	36	71	21	18	18
StLNC2505	3.83349	0.0562073	no change	4	1	23	1	0	0
StLNC2506	-5.24177	0.181783	no change	0	0	0	14	0	0
StLNC2508	0.105749	0.893925	no change	10	12	21	3	10	13
StLNC2513	-2.70422	0.48274	no change	0	0	4	12	0	0
StLNC2514	0.455847	0.618905	no change	3	6	11	2	3	4
StLNC2517	-2.16975	0.346353	no change	2	5	4	0	30	0
StLNC2520	-0.587416	0.798439	no change	56	0	844	135	479	3
StLNC2521	-1.98097	0.0317946	down	2	3	3	5	6	10
StLNC2523	-0.347823	0.701393	no change	13	16	19	5	8	30
StLNC2525	-0.924612	0.513756	no change	1	1	43	12	12	17
StLNC2527	1.11207	0.0901878	no change	14	20	42	5	6	11
StLNC2530	1.55244	0.43879	no change	17	33	44	0	0	22
StLNC2533	0.288135	0.822266	no change	5	6	8	4	6	0
StLNC2534	0.951782	0.117314	no change	16	48	57	14	8	17
StLNC2535	-1.18598	0.0841058	no change	6	10	17	11	11	26
StLNC2536	0.344047	0.532428	no change	232	743	876	213	242	448
StLNC2538	0.842383	0.144787	no change	29	45	69	16	23	11
StLNC2547	4.01166	0.00762068	up	9	9	35	0	0	2
StLNC2549	-1.12621	0.376992	no change	2	13	96	14	65	37
StLNC2551	-0.0703007	0.957973	no change	0	13	19	4	9	5
StLNC2552	-5.23817	0.164279	no change	0	0	2	0	0	44
StLNC2555	-0.455767	0.337644	no change	86	128	182	102	77	180
StLNC2556	1.72935	0.338357	no change	7	10	24	0	7	0
StLNC2558	-0.264934	0.927972	no change	4	10	0	0	12	0
StLNC2559	0.254373	0.742462	no change	29	32	57	12	11	44
StLNC2560	-4.62157	0.121499	no change	0	2	1	44	0	0
StLNC2561	2.22149	0.232568	no change	12	24	52	11	0	0
StLNC2562	-0.349338	0.59611	no change	19	62	65	27	56	30
StLNC2564	-4.08919	0.0119257	down	0	1	1	10	1	11
StLNC2565	-2.87573	0.0173514	down	2	6	12	51	29	3
StLNC2566	5.4465	0.0981842	no change	11	19	0	0	0	0
StLNC2567	-1.19825	0.367764	no change	0	2	7	5	4	2
StLNC2569	1.30659	0.278453	no change	53	12	163	16	33	4
StLNC2570	8.38562	0.0100346	up	70	0	247	0	0	0
StLNC2573	-0.343665	0.586309	no change	25	44	69	17	38	56
StLNC2575	-4.47839	0.0769244	no change	0	0	4	0	29	13
StLNC2576	-0.133938	0.886157	no change	10	57	103	28	13	67
StLNC2578	7.54854	0.0155079	up	0	72	125	0	0	0
StLNC2579	5.71299	0.00343831	up	13	20	5	0	0	0
StLNC2582	0.592539	0.835075	no change	6	9	0	8	0	0
StLNC2584	0.103534	0.925777	no change	5	22	62	17	23	3
StLNC2585	1.02567	0.571876	no change	0	1	43	3	3	4
StLNC2586	-0.9166	0.637774	no change	0	9	10	8	11	0
StLNC2587	-1.83893	0.075034	no change	5	6	7	17	22	3
StLNC2588	-1.48985	0.630268	no change	0	1	20	27	0	0
StLNC2589	1.23741	0.670594	no change	0	35	45	0	17	0
StLNC2590	0.462902	0.752341	no change	9	7	7	0	2	11
StLNC2591	0.308016	0.93431	no change	43	0	0	0	0	40
StLNC2592	-0.553883	0.851226	no change	0	0	43	0	17	11
StLNC2593	-1.89014	0.0959348	no change	19	3	43	15	51	90
StLNC2594	0.519485	0.579814	no change	17	30	146	17	11	47
StLNC2595	0.104441	0.964887	no change	30	62	0	41	24	0
StLNC2596	-0.893583	0.502312	no change	0	8	26	12	5	16
StLNC2597	1.81898	0.127382	no change	36	86	10	18	4	6
StLNC2599	0.747328	0.576807	no change	2	10	11	5	3	0
StLNC2601	-2.39324	0.377804	no change	0	0	12	18	10	0
StLNC2602	-0.399504	0.412022	no change	72	135	217	129	133	79
StLNC2604	0.965281	0.426192	no change	4	15	15	6	0	5
StLNC2605	-1.09183	0.217633	no change	5	2	9	8	8	6
StLNC2606	-0.787807	0.0872762	no change	69	81	217	134	99	157
StLNC2607	0.083199	0.953352	no change	15	22	47	18	0	33
StLNC2608	1.13442	0.0746103	no change	41	42	41	13	15	12
StLNC2611	0.276149	0.521978	no change	27	50	62	26	20	28
StLNC2612	-0.620949	0.521735	no change	10	5	14	18	8	4
StLNC2613	-0.787308	0.398933	no change	3	10	25	15	4	19
StLNC2614	-0.186586	0.836476	no change	4	7	8	8	3	3
StLNC2616	0.373637	0.484779	no change	180	521	554	242	214	139
StLNC2617	1.47215	0.481909	no change	1	18	21	8	0	0
StLNC2618	4.6012	0.155116	no change	0	8	18	0	0	0
StLNC2619	-7.80763	0.0150868	down	0	0	0	0	64	16
StLNC2620	0.668178	0.133321	no change	42	51	84	22	20	31
StLNC2621	-0.164361	0.73453	no change	15	26	47	19	21	21
StLNC2624	-1.2994	0.655407	no change	0	18	0	15	13	0
StLNC2626	1.00784	0.790565	no change	0	0	24	0	5	0
StLNC2628	0.405244	0.207751	no change	97	175	285	91	77	94
StLNC2629	-0.73586	0.355381	no change	56	156	154	53	83	263
StLNC2630	-0.0288264	0.940841	no change	72	175	236	100	84	122
StLNC2631	-0.623034	0.166086	no change	109	114	167	104	133	172
StLNC2632	-0.303252	0.646934	no change	25	25	40	14	20	42
StLNC2633	-0.171537	0.876436	no change	131	47	30	97	27	85
StLNC2634	-0.498238	0.485451	no change	16	33	50	44	28	13
StLNC2635	0.921477	0.696822	no change	10	76	0	8	0	26
StLNC2637	-0.589406	0.551027	no change	12	67	31	67	24	14
StLNC2639	0.639553	0.490158	no change	42	120	35	16	19	57
StLNC2640	-7.92825	0.00298149	down	0	0	0	86	3	1
StLNC2641	10.4737	0.00223207	up	0	986	306	0	0	0
StLNC2642	0.748478	0.719619	no change	0	9	32	2	0	11
StLNC2643	-0.45069	0.487279	no change	13	60	94	47	43	41
StLNC2645	-1.36176	0.478301	no change	0	4	6	3	0	12
StLNC2646	-0.781866	0.662407	no change	1	0	9	7	1	1
StLNC2647	-0.984735	0.217897	no change	3	6	11	9	10	5
StLNC2648	5.4619	0.0968094	no change	18	0	12	0	0	0
StLNC2649	-0.839894	0.484622	no change	27	3	99	36	20	83
StLNC2650	-0.290231	0.608235	no change	150	112	192	109	100	185
StLNC2651	1.11226	0.0600962	no change	214	533	657	178	143	75
StLNC2653	0.936394	0.390172	no change	10	4	10	1	4	4
StLNC2654	0.0652629	0.965954	no change	4	5	186	50	5	34
StLNC2655	0.36135	0.824563	no change	5	15	66	0	6	31
StLNC2660	0.264229	0.648028	no change	14	22	45	14	9	19
StLNC2662	-1.61977	0.194391	no change	0	4	11	8	12	4
StLNC2664	-0.234851	0.76002	no change	5	15	11	6	6	12
StLNC2666	-5.88343	0.065047	no change	0	0	0	0	6	17
StLNC2667	0.488508	0.245504	no change	78	178	301	89	65	86
StLNC2668	-0.178692	0.745703	no change	20	42	54	18	24	42
StLNC2670	1.27919	0.279782	no change	2	9	18	1	1	5
StLNC2672	0.763339	0.137037	no change	42	45	79	20	15	30
StLNC2674	-5.56808	0.0260436	down	0	1	1	57	0	1
StLNC2676	0.17404	0.869842	no change	2	12	28	8	2	11
StLNC2677	0.998228	0.0416694	no change	84	85	117	30	27	42
StLNC2678	3.25915	0.00591903	up	12	21	71	4	2	0
StLNC2679	-6.67492	0.000339541	down	0	0	0	15	18	4
StLNC2680	-0.712318	0.406696	no change	5	5	5	7	4	6
StLNC2681	-0.220907	0.604952	no change	43	53	97	38	45	62
StLNC2682	-1.1835	0.302306	no change	14	29	23	72	22	4
StLNC2683	7.03658	0.0271494	up	30	0	91	0	0	0
StLNC2684	-1.34855	0.133624	no change	3	11	13	19	17	5
StLNC2685	0.958222	0.51201	no change	31	14	32	19	9	0
StLNC2689	0.231907	0.722391	no change	8	11	22	7	6	9
StLNC2690	-0.311739	0.46657	no change	34	43	56	39	32	39
StLNC2691	0.393071	0.505771	no change	17	44	69	17	26	16
StLNC2692	-0.54351	0.509825	no change	4	5	18	7	10	6
StLNC2693	-0.366624	0.8536	no change	0	2	13	3	0	7
StLNC2695	-1.11648	0.57461	no change	0	2	13	0	8	8
StLNC2696	-6.7708	0.0427162	down	0	0	0	0	3	41
StLNC2697	7.1849	0.000786	up	36	3	90	0	0	0
StLNC2698	1.0563	0.710333	no change	4	14	0	0	6	0
StLNC2700	-1.15406	0.706815	no change	19	0	0	14	0	33
StLNC2701	0.00476487	0.996622	no change	6	24	37	8	2	31
StLNC2706	0.483651	0.824017	no change	13	0	55	0	11	17
StLNC2707	-5.70328	0.0726004	no change	0	0	0	0	7	13
StLNC2708	-0.893912	0.0430259	no change	37	53	93	93	56	66
StLNC2709	0.0110379	0.985962	no change	582	462	435	349	342	417
StLNC2712	-0.322722	0.8205	no change	6	15	10	16	9	0
StLNC2714	0.765219	0.332264	no change	5	13	14	4	3	5
StLNC2718	-0.830752	0.551424	no change	57	2	19	68	34	20
StLNC2721	0.507279	0.815481	no change	0	35	51	0	7	27
StLNC2722	-7.26747	0.0631653	no change	0	0	0	57	0	0
StLNC2724	3.13196	0.113967	no change	43	91	144	0	18	0
StLNC2725	1.62549	0.0538914	no change	7	36	33	3	6	6
StLNC2726	6.36002	0.000643888	up	28	8	24	0	0	0
StLNC2727	0.280268	0.588944	no change	31	46	79	28	33	19
StLNC2728	-3.13347	0.414427	no change	0	3	0	0	0	19
StLNC2730	-0.471706	0.837117	no change	15	0	77	0	35	35
StLNC2731	4.6472	0.00457994	up	2	100	183	0	3	3
StLNC2732	-0.202604	0.876275	no change	0	9	9	5	2	5
StLNC2733	-0.877588	0.427261	no change	2	3	6	2	2	9
StLNC2734	-1.26875	0.289316	no change	0	10	14	16	7	9
StLNC2735	-0.668481	0.343874	no change	43	32	31	35	51	39
StLNC2736	-0.777202	0.356379	no change	19	21	43	18	12	65
StLNC2738	0.0826043	0.89766	no change	91	58	183	68	41	99
StLNC2739	0.295648	0.89468	no change	0	58	39	31	13	0
StLNC2740	-2.26175	0.0709398	no change	7	18	135	100	22	283
StLNC2741	-0.964705	0.123088	no change	9	21	22	25	25	14
StLNC2742	0.235602	0.709429	no change	14	25	21	14	11	9
StLNC2743	-0.596764	0.493709	no change	10	6	17	6	7	21
StLNC2745	1.48945	0.38815	no change	3	9	9	0	0	5
StLNC2746	-5.68695	0.14691	no change	0	0	0	0	0	21
StLNC2747	1.57509	0.57561	no change	12	6	0	0	0	6
StLNC2748	-0.53153	0.339075	no change	25	88	75	52	45	76
StLNC2749	-1.21198	0.625499	no change	41	32	0	0	25	133
StLNC2750	1.4004	0.352695	no change	10	85	52	10	0	26
StLNC2751	2.96335	0.00534355	up	16	21	39	2	4	0
StLNC2753	1.45672	0.271909	no change	270	274	220	9	12	200
StLNC2754	6.83441	4.61e-06	up	18	41	38	0	0	0
StLNC2756	0.313972	0.770976	no change	3	8	8	1	2	7
StLNC2757	1.53079	0.261655	no change	24	68	91	0	16	23
StLNC2760	-2.21343	0.0168528	down	13	4	9	36	15	42
StLNC2762	-0.599291	0.837659	no change	5	4	0	0	11	0
StLNC2764	-0.805739	0.29401	no change	6	6	23	8	11	18
StLNC2765	0.265211	0.834169	no change	32	59	95	47	44	1
StLNC2766	2.61033	0.116293	no change	45	87	7	0	13	4
StLNC2768	-0.24828	0.775819	no change	40	32	42	54	30	11
StLNC2772	5.35308	0.14934	no change	21	0	1	0	0	0
StLNC2773	0.515301	0.84106	no change	114	50	306	201	0	0
StLNC2776	3.3765	0.00758174	up	9	27	9	1	1	1
StLNC2778	-1.04286	0.184968	no change	19	56	79	70	91	24
StLNC2780	0.666145	0.742729	no change	1985	2064	2419	689	2003	0
StLNC2782	2.37436	0.105204	no change	3	33	3	2	2	1
StLNC2783	-0.171443	0.777059	no change	32	84	207	80	64	61
StLNC2784	0.452857	0.398989	no change	85	103	135	55	30	77
StLNC2785	-2.56478	0.0126908	down	4	2	2	11	16	7
StLNC2790	-0.057297	0.914158	no change	19	25	34	15	14	25
StLNC2791	0.669041	0.829319	no change	29	0	0	0	11	8
StLNC2792	-5.82681	0.137097	no change	0	0	0	21	0	0
StLNC2793	0.367	0.786177	no change	12	24	24	10	0	22
StLNC2794	-0.411333	0.54274	no change	8	13	23	16	6	15
StLNC2797	0.243644	0.708989	no change	21	28	32	10	11	26
StLNC2798	5.15994	0.187672	no change	0	30	0	0	0	0
StLNC2803	-0.325201	0.722203	no change	15	7	41	18	6	26
StLNC2804	0.21049	0.818666	no change	4	8	7	3	2	6
StLNC2805	0.407109	0.906854	no change	107	0	0	0	6	86
StLNC2806	-5.24177	0.181783	no change	0	0	0	14	0	0
StLNC2809	-1.3152	0.725911	no change	0	0	26	0	27	0
StLNC2811	0.723143	0.719143	no change	0	11	22	0	2	9
StLNC2813	5.02514	0.00804202	up	4	5	23	0	0	0
StLNC2814	-1.6252	0.356589	no change	24	0	2	34	20	26
StLNC2815	-0.51482	0.830914	no change	0	0	31	17	1	2
StLNC2817	10.8199	1.72e-06	up	464	757	21	0	0	0
StLNC2819	-2.41228	0.523977	no change	4	0	0	0	0	24
StLNC2821	1.3149	0.318242	no change	25	21	51	0	15	10
StLNC2822	-0.539214	0.231441	no change	315	518	888	399	395	793
StLNC2825	-0.6894	0.492094	no change	20	14	72	26	61	10
StLNC2826	0.159763	0.876537	no change	3	8	6	1	4	5
StLNC2828	0.565343	0.846827	no change	0	0	38	4	7	0
StLNC2830	-6.33833	0.105501	no change	0	0	0	0	0	33
StLNC2832	6.02998	0.0639973	no change	18	26	0	0	0	0
StLNC2833	-0.483717	0.384164	no change	12	18	36	17	14	27
StLNC2834	2.80736	0.00779339	up	168	440	2366	105	85	22
StLNC2835	4.7935	0.147078	no change	6	0	20	0	0	0
StLNC2836	1.64032	0.542207	no change	0	15	27	7	0	0
StLNC2839	0.855016	0.149576	no change	21	26	35	13	9	8
StLNC2840	-0.215967	0.916171	no change	5	4	9	0	0	15
StLNC2841	-0.688631	0.509393	no change	1	5	11	6	2	8
StLNC2842	-0.279137	0.700211	no change	11	28	83	36	25	21
StLNC2843	-1.85947	0.00212422	down	7	14	34	44	42	31
StLNC2848	-0.250859	0.650679	no change	177	155	336	141	119	274
StLNC2852	-0.196138	0.806762	no change	119	130	107	45	70	191
StLNC2853	-4.75685	0.0180672	down	1	1	1	4	0	57
StLNC2854	1.65746	0.0263913	up	11	31	32	4	3	8
StLNC2857	-5.28111	0.0334675	down	0	0	2	21	20	0

## Sheet: mht4_vs_mht0
LncRNA	log2FC	pvalue	regulations	mht4_1	mht4_2	mht4_3	mht0_1	mht0_2	mht0_3
StLNC2190	-9.77826	0.00218202	down	0	0	0	0	179	181
StLNC1847	-8.6355	0.00589314	down	0	0	0	45	0	128
StLNC1624	-8.1063	4.63e-05	down	0	0	0	8	19	92
StLNC2452	-8.05732	1.6e-06	down	0	0	0	14	41	55
StLNC0217	-8.05311	0.00972151	down	0	0	0	67	37	0
StLNC0908	-7.95646	0.00989483	down	0	0	0	0	55	46
StLNC1581	-7.79524	2.09e-07	down	0	0	0	25	24	43
StLNC2805	-7.69752	0.0191773	down	0	0	0	0	6	86
StLNC2619	-7.68225	0.0153367	down	0	0	0	0	64	16
StLNC1110	-7.63428	0.0190407	down	0	0	0	71	8	0
StLNC1452	-7.60561	0.000954407	down	0	0	0	26	1	57
StLNC1182	-7.48072	0.015972	down	0	0	0	46	24	0
StLNC2380	-7.24356	0.0640175	no change	0	0	0	0	0	68
StLNC1931	-7.17956	0.0664165	no change	0	0	0	58	0	0
StLNC0092	-7.11176	0.0215245	down	0	0	0	32	22	0
StLNC2139	-7.07954	0.0703142	no change	0	0	0	0	51	0
StLNC2729	-7.07954	0.0703142	no change	0	0	0	0	51	0
StLNC1454	-7.07791	0.00160569	down	2	0	3	221	216	0
StLNC0616	-7.05096	0.0714621	no change	0	0	0	0	50	0
StLNC1011	-6.95675	0.0248002	down	0	0	0	20	28	0
StLNC0666	-6.78208	0.000491115	down	0	0	0	14	25	4
StLNC2225	-6.76453	0.0838403	no change	0	0	0	0	41	0
StLNC0144	-6.72795	0.00498159	down	0	0	0	36	1	6
StLNC0482	-6.72188	8.38e-05	down	0	0	0	15	19	8
StLNC2367	-6.67799	0.0316594	down	0	0	0	24	16	0
StLNC0220	-6.67183	6.28e-05	down	0	0	1	8	43	29
StLNC1239	-6.6554	0.0322382	down	0	0	0	17	22	0
StLNC2696	-6.63484	0.0454434	down	0	0	0	0	3	41
StLNC2552	-6.6159	0.0909211	no change	0	0	0	0	0	44
StLNC2679	-6.55458	0.000545538	down	0	0	0	15	18	4
StLNC2478	-6.53613	0.0949166	no change	0	0	0	0	35	0
StLNC1673	-6.53098	0.0951795	no change	0	0	0	37	0	0
StLNC1189	-6.49907	0.0103928	down	0	0	1	27	41	0
StLNC2591	-6.4785	0.0978906	no change	0	0	0	0	0	40
StLNC2423	-6.45119	0.0993257	no change	0	0	0	0	33	0
StLNC1085	-6.44691	0.0385651	down	0	0	0	19	15	0
StLNC1691	-6.37343	0.0388832	down	0	0	0	18	0	17
StLNC1695	-6.36569	0.00522163	down	0	1	0	4	56	1
StLNC1765	-6.33021	0.0422499	down	0	0	0	0	11	23
StLNC0698	-6.27569	0.108957	no change	0	0	0	31	0	0
StLNC1564	-6.27569	0.108957	no change	0	0	0	31	0	0
StLNC2321	-6.24424	0.110759	no change	0	0	0	0	0	34
StLNC0016	-6.24245	0.0526504	no change	0	0	0	0	5	28
StLNC2421	-6.19346	0.0456289	down	0	0	0	15	0	16
StLNC2601	-6.15949	0.0507142	no change	0	0	0	18	10	0
StLNC2066	-6.12883	0.117577	no change	0	0	0	28	0	0
StLNC1346	-6.05485	0.0551435	no change	0	0	0	16	10	0
StLNC0693	-6.05036	0.122398	no change	0	0	0	0	25	0
StLNC2121	-6.019	0.0545254	no change	0	0	0	0	11	16
StLNC1313	-5.92429	0.0678974	no change	0	0	0	19	5	0
StLNC2286	-5.86363	0.0709201	no change	0	0	0	18	5	0
StLNC0333	-5.83549	0.00663951	down	0	0	0	17	3	3
StLNC1797	-5.79859	0.138929	no change	0	0	0	0	21	0
StLNC1972	-5.77628	0.0669711	no change	0	0	0	13	0	10
StLNC2357	-5.75435	0.00203702	down	1	0	0	14	2	29
StLNC2126	-5.74998	0.102808	no change	0	0	0	1	0	23
StLNC2792	-5.71372	0.144877	no change	0	0	0	21	0	0
StLNC1218	-5.71372	0.144877	no change	0	0	0	21	0	0
StLNC2165	-5.68097	0.147225	no change	0	0	0	0	0	23
StLNC2161	-5.67737	0.0763493	no change	0	0	0	12	8	0
StLNC1854	-5.65405	0.149175	no change	0	0	0	0	19	0
StLNC0445	-5.64332	0.149959	no change	0	0	0	20	0	0
StLNC2210	-5.64332	0.149959	no change	0	0	0	20	0	0
StLNC0913	-5.57596	0.154949	no change	0	0	0	0	18	0
StLNC2707	-5.57178	0.0817489	no change	0	0	0	0	7	13
StLNC0601	-5.57068	0.00273284	down	0	0	0	7	8	4
StLNC0267	-5.5693	0.155449	no change	0	0	0	19	0	0
StLNC2791	-5.55437	0.0830944	no change	0	0	0	0	11	8
StLNC0174	-5.53831	0.0857622	no change	0	0	0	8	10	0
StLNC2401	-5.52864	0.0836949	no change	0	0	0	0	9	10
StLNC0980	-5.49128	0.161402	no change	0	0	0	18	0	0
StLNC1682	-5.48817	0.124128	no change	0	0	0	1	16	0
StLNC1426	-5.39556	0.0601108	no change	0	0	1	1	30	0
StLNC2674	-5.37532	0.0326128	down	1	0	1	57	0	1
StLNC2186	-5.36193	0.110806	no change	0	0	0	0	13	3
StLNC1692	-5.32796	0.0125454	down	1	0	0	2	26	2
StLNC0706	-5.28646	0.108508	no change	0	0	0	4	0	13
StLNC0242	-5.28232	0.110499	no change	0	0	0	12	0	4
StLNC0085	-5.26199	0.108494	no change	0	0	0	9	6	0
StLNC1400	-5.24555	0.181293	no change	0	0	0	0	0	17
StLNC0730	-5.22818	0.182765	no change	0	0	0	15	0	0
StLNC1974	-5.21781	0.145577	no change	0	0	0	14	0	1
StLNC0498	-5.15824	0.188786	no change	0	0	0	0	0	16
StLNC2806	-5.12861	0.191381	no change	0	0	0	14	0	0
StLNC0961	-5.09909	0.157828	no change	0	0	0	1	12	0
StLNC2262	-5.06532	0.197015	no change	0	0	0	0	0	15
StLNC0236	-5.06532	0.197015	no change	0	0	0	0	0	15
StLNC2311	-5.02166	0.200971	no change	0	0	0	13	0	0
StLNC0155	-5.02166	0.200971	no change	0	0	0	13	0	0
StLNC2814	-5.00231	0.000138357	down	0	0	4	34	20	26
StLNC2812	-4.99017	0.203861	no change	0	0	0	0	12	0
StLNC1191	-4.96599	0.206101	no change	0	0	0	0	0	14
StLNC2259	-4.96599	0.206101	no change	0	0	0	0	0	14
StLNC0173	-4.92461	0.138153	no change	0	0	0	5	0	8
StLNC2264	-4.90615	0.211723	no change	0	0	0	12	0	0
StLNC0826	-4.90615	0.211723	no change	0	0	0	12	0	0
StLNC2513	-4.90615	0.211723	no change	0	0	0	12	0	0
StLNC1782	-4.89325	0.17745	no change	0	0	0	11	0	1
StLNC1613	-4.86441	0.215709	no change	0	0	0	0	11	0
StLNC1984	-4.86441	0.215709	no change	0	0	0	0	11	0
StLNC0581	-4.85178	0.147246	no change	0	0	0	0	5	7
StLNC1690	-4.83877	0.003905	down	0	0	14	58	69	96
StLNC2828	-4.8337	0.154833	no change	0	0	0	4	7	0
StLNC0324	-4.82616	0.153415	no change	0	0	0	5	6	0
StLNC2497	-4.79588	0.171087	no change	0	0	0	9	2	0
StLNC1878	-4.79127	0.0187844	down	1	0	2	25	0	33
StLNC0554	-4.77827	0.0425858	down	0	1	1	36	0	2
StLNC2785	-4.7402	0.00216754	down	0	0	2	11	16	7
StLNC2815	-4.66979	0.0297752	down	0	0	1	17	1	2
StLNC2530	-4.65526	0.215679	no change	0	1	0	0	0	22
StLNC2857	-4.6462	0.0624062	no change	0	0	3	21	20	0
StLNC0541	-4.63914	1.42e-05	down	1	2	2	39	36	13
StLNC0279	-4.62606	0.00187864	down	3	0	2	39	44	4
StLNC0724	-4.62109	0.0045797	down	0	2	0	20	12	6
StLNC0964	-4.58824	0.222988	no change	0	1	0	0	0	21
StLNC2031	-4.46923	0.0724639	no change	0	0	1	11	0	7
StLNC0997	-4.4294	0.106247	no change	0	0	9	0	78	23
StLNC2494	-4.38653	0.0107269	down	0	0	2	14	9	3
StLNC0346	-4.35474	0.0910597	no change	0	0	183	174	1571	119
StLNC1101	-4.12343	0.124176	no change	0	0	4	34	4	0
StLNC0900	-4.08937	0.162949	no change	1	0	2	0	0	37
StLNC0230	-4.07808	0.000629379	down	1	1	1	8	9	21
StLNC1148	-4.07012	0.0244453	down	1	0	0	5	6	2
StLNC0638	-4.05765	0.0220611	down	2	0	0	3	7	18
StLNC1135	-4.04194	0.28661	no change	0	0	2	0	18	0
StLNC1754	-4.00431	0.295323	no change	0	1	0	0	0	14
StLNC2040	-4.00019	0.150946	no change	0	2	0	24	2	0
StLNC1305	-3.93529	0.0313407	down	1	0	10	27	1	76
StLNC1769	-3.91047	0.120519	no change	0	0	1	0	6	6
StLNC2103	-3.88032	0.0339629	down	1	0	0	2	3	7
StLNC2351	-3.85464	0.131345	no change	1	0	0	6	5	0
StLNC0939	-3.82293	0.144023	no change	0	3	0	19	15	0
StLNC2734	-3.69148	0.0242195	down	3	0	0	16	7	9
StLNC2840	-3.53188	0.355237	no change	0	0	2	0	0	15
StLNC1506	-3.47134	0.172447	no change	0	0	2	0	4	10
StLNC2322	-3.45702	0.369622	no change	0	0	2	0	12	0
StLNC0215	-3.45068	0.0286191	down	0	0	3	9	7	4
StLNC0710	-3.36211	0.0403747	down	10	0	8	9	11	125
StLNC2098	-3.35695	0.131938	no change	0	0	41	85	8	142
StLNC2819	-3.32386	0.381917	no change	0	0	4	0	0	24
StLNC0988	-3.31217	0.198526	no change	0	0	4	6	15	0
StLNC0504	-3.31184	0.220585	no change	0	0	11	0	21	40
StLNC0291	-3.30367	0.124872	no change	3	0	0	1	3	23
StLNC0329	-3.30229	0.00893096	down	68	39	2	334	267	335
StLNC1462	-3.29073	0.0717895	no change	1	0	3	22	1	2
StLNC1084	-3.24957	0.0579154	no change	0	0	2	4	5	3
StLNC1771	-3.20603	0.110898	no change	0	2	5	16	23	0
StLNC1070	-3.20057	0.116852	no change	0	0	37	38	41	109
StLNC0328	-3.19626	0.0339699	down	9	0	12	10	21	109
StLNC2224	-3.18828	0.00765877	down	4	11	6	97	38	7
StLNC0819	-3.17024	0.0558121	no change	0	0	8	16	16	8
StLNC2565	-3.16622	0.00873042	down	4	4	5	51	29	3
StLNC0811	-3.15696	0.401451	no change	0	0	12	0	0	63
StLNC2481	-3.15635	0.235905	no change	0	0	5	20	4	0
StLNC0004	-3.15464	0.128949	no change	3	0	9	35	29	0
StLNC1256	-3.15321	0.0586463	no change	0	4	0	9	11	9
StLNC2028	-3.14989	0.11626	no change	0	2	0	1	9	4
StLNC2560	-3.14305	0.186907	no change	2	2	3	44	0	0
StLNC1541	-3.10491	0.0433134	down	5	0	8	49	21	3
StLNC1319	-3.10295	0.0107336	down	0	2	4	18	10	6
StLNC2202	-3.08082	0.00660593	down	0	2	4	10	7	18
StLNC1534	-3.07854	0.0727223	no change	0	0	3	3	3	10
StLNC0465	-3.05132	0.103425	no change	0	0	16	23	36	11
StLNC2300	-3.01281	0.0394675	down	0	2	3	4	3	22
StLNC0141	-3.00225	0.0240167	down	4	0	6	28	20	5
StLNC2453	-2.98433	0.195194	no change	1	0	1	10	1	0
StLNC0367	-2.97195	0.155528	no change	4	0	3	31	8	0
StLNC2188	-2.96221	0.147161	no change	0	2	1	0	11	6
StLNC0747	-2.88657	0.283742	no change	0	0	10	16	22	0
StLNC1442	-2.88271	0.334125	no change	17	0	0	41	64	0
StLNC2521	-2.86182	0.0194372	down	2	0	2	5	6	10
StLNC1338	-2.78253	0.168039	no change	0	0	30	17	31	66
StLNC2659	-2.75979	0.124917	no change	0	0	3	2	7	3
StLNC0838	-2.75439	0.111735	no change	0	1	2	1	10	2
StLNC0171	-2.7537	0.358884	no change	4	0	1	0	0	30
StLNC0405	-2.72645	0.171364	no change	0	1	2	0	8	5
StLNC0470	-2.6956	0.158449	no change	0	0	8	15	11	2
StLNC1882	-2.63006	0.0179658	down	38	17	3	110	70	131
StLNC2525	-2.61397	0.133121	no change	0	0	12	12	12	17
StLNC1028	-2.59292	0.493249	no change	0	0	8	0	24	0
StLNC2281	-2.57305	0.14056	no change	0	0	10	8	8	18
StLNC1623	-2.55983	0.0718383	no change	0	8	15	40	38	7
StLNC0132	-2.52806	0.13488	no change	0	0	5	8	3	6
StLNC1841	-2.51211	0.505562	no change	0	0	10	30	0	0
StLNC0563	-2.51113	0.0207674	down	10	4	6	37	41	6
StLNC2362	-2.48495	0.10164	no change	1	0	7	2	14	11
StLNC0702	-2.46205	0.345726	no change	0	0	4	0	3	10
StLNC1488	-2.4509	0.00491077	down	4	4	23	21	36	52
StLNC0321	-2.42604	0.418583	no change	0	8	4	0	0	53
StLNC1157	-2.41342	7.07e-05	down	16	14	24	69	89	45
StLNC0834	-2.40663	0.0359286	down	0	3	4	6	7	13
StLNC1272	-2.38826	0.393607	no change	0	8	0	18	16	0
StLNC0768	-2.36118	0.0742077	no change	2	2	2	8	13	1
StLNC0800	-2.34647	0.00477946	down	16	5	10	27	28	68
StLNC2718	-2.2902	0.102612	no change	16	0	21	68	34	20
StLNC2175	-2.28982	0.00271668	down	3	7	8	13	20	31
StLNC1021	-2.2766	0.545974	no change	0	0	11	28	0	0
StLNC2695	-2.26713	0.383414	no change	0	0	6	0	8	8
StLNC2069	-2.26119	0.55217	no change	0	4	0	16	0	0
StLNC1437	-2.25618	0.392168	no change	0	0	7	0	6	13
StLNC2549	-2.22648	0.0149446	down	15	6	13	14	65	37
StLNC1303	-2.22399	0.0357281	down	3	2	6	21	10	4
StLNC0115	-2.2168	0.557331	no change	0	6	0	0	22	0
StLNC0344	-2.21448	0.0871927	no change	4	0	18	13	20	30
StLNC1632	-2.19753	0.0867959	no change	7	0	7	16	6	25
StLNC0652	-2.17511	0.0501709	no change	0	4	7	9	13	11
StLNC2301	-2.15672	0.358055	no change	24	18	0	83	73	0
StLNC1327	-2.15067	0.412988	no change	0	0	6	7	7	0
StLNC0033	-2.1429	0.249741	no change	0	4	0	4	3	8
StLNC2506	-2.13845	0.574498	no change	0	0	6	14	0	0
StLNC0425	-2.13684	0.180695	no change	10	0	18	5	58	15
StLNC1701	-2.13668	0.0145178	down	14	31	17	92	85	27
StLNC0582	-2.13376	0.426729	no change	3	0	0	4	0	8
StLNC1531	-2.12434	0.414628	no change	0	0	5	0	7	5
StLNC0628	-2.1127	0.337334	no change	0	0	74	55	72	40
StLNC1455	-2.11075	0.0513712	no change	4	1	3	12	9	4
StLNC1198	-2.08736	0.011025	down	6	6	15	44	20	14
StLNC1310	-2.07969	0.0826922	no change	6	2	3	23	9	3
StLNC0397	-2.04688	0.134224	no change	3	0	2	8	4	3
StLNC1077	-2.04181	0.020423	down	8	13	20	49	54	12
StLNC2711	-2.03944	0.24338	no change	1	1	1	0	6	3
StLNC0339	-2.03895	0.298898	no change	0	11	0	14	13	11
StLNC1296	-2.03601	0.467532	no change	3	0	0	2	8	0
StLNC0660	-2.02538	0.00341432	down	38	16	47	90	134	64
StLNC0720	-2.02363	0.3201	no change	0	5	3	16	7	0
StLNC0825	-2.00519	0.00190413	down	14	5	18	31	34	41
StLNC1471	-2.00171	0.60159	no change	0	3	0	10	0	0
StLNC2558	-2	0.599705	no change	0	0	6	0	12	0
StLNC0870	-1.98749	0.00648725	down	54	122	160	388	383	145
StLNC0222	-1.98723	0.585286	no change	403	0	0	530	813	0
StLNC1457	-1.98629	0.498802	no change	15	0	0	0	15	40
StLNC0786	-1.97761	0.606017	no change	0	3	0	0	0	11
StLNC2151	-1.9718	0.510495	no change	0	0	43	53	33	0
StLNC1398	-1.96665	0.315105	no change	39	167	29	302	0	492
StLNC1872	-1.9432	0.0194657	down	37	32	37	100	160	35
StLNC2575	-1.94226	0.495707	no change	0	0	21	0	29	13
StLNC0400	-1.94049	0.144066	no change	4	7	8	45	4	3
StLNC0122	-1.93171	0.299547	no change	0	5	0	6	4	6
StLNC2635	-1.92667	0.242124	no change	1	5	6	8	0	26
StLNC0764	-1.92387	0.420859	no change	5	9	3	51	0	0
StLNC1115	-1.92145	0.4818	no change	4	0	0	4	0	10
StLNC1433	-1.91976	0.0200652	down	7	17	10	52	23	22
StLNC2313	-1.91637	0.116149	no change	0	5	6	7	14	7
StLNC0262	-1.91542	0.354168	no change	0	4	8	0	22	6
StLNC2722	-1.91358	0.609226	no change	0	0	29	57	0	0
StLNC2251	-1.90234	0.0816171	no change	6	3	15	32	22	4
StLNC1061	-1.89451	0.430723	no change	0	0	32	3	3	63
StLNC2749	-1.89361	0.548171	no change	0	0	75	0	25	133
StLNC1961	-1.89261	0.27324	no change	0	14	39	50	63	3
StLNC0839	-1.89102	0.351783	no change	0	0	24	7	26	14
StLNC1519	-1.88237	0.119351	no change	6	0	6	8	14	9
StLNC0187	-1.88173	0.0426185	down	8	2	4	16	13	10
StLNC0386	-1.87945	0.00732929	down	11	14	27	45	61	24
StLNC0380	-1.87836	0.322703	no change	0	0	15	8	6	17
StLNC0975	-1.87322	0.100007	no change	4	0	5	8	7	8
StLNC1132	-1.86648	0.0557462	no change	7	3	6	19	18	5
StLNC1657	-1.8658	0.113632	no change	36	6	7	18	82	45
StLNC2692	-1.8455	0.190111	no change	0	1	10	7	10	6
StLNC1886	-1.81838	0.501468	no change	0	0	11	0	11	10
StLNC1019	-1.80556	0.448132	no change	1	1	7	19	0	0
StLNC2764	-1.80012	0.0986155	no change	1	2	14	8	11	18
StLNC0712	-1.79606	0.493187	no change	0	0	6	5	0	7
StLNC1831	-1.79492	0.287388	no change	2	2	10	0	5	28
StLNC2405	-1.79349	0.561571	no change	0	0	60	21	0	98
StLNC2783	-1.7926	0.00364681	down	21	13	55	80	64	61
StLNC1236	-1.78998	0.234051	no change	7	0	2	11	10	3
StLNC2553	-1.78943	0.220626	no change	1	0	3	3	4	2
StLNC2238	-1.77089	0.184076	no change	4	0	3	6	8	3
StLNC0989	-1.76447	0.0371884	down	36	23	63	133	118	29
StLNC1561	-1.74565	0.563254	no change	8	6	0	0	0	45
StLNC0565	-1.74423	0.302004	no change	29	0	43	107	43	8
StLNC2074	-1.74261	0.0252262	down	20	4	22	39	33	38
StLNC1290	-1.74255	0.522112	no change	0	0	11	10	9	0
StLNC0523	-1.73127	0.554066	no change	2	3	0	14	0	0
StLNC2284	-1.72285	0.0207831	down	6	5	7	18	15	10
StLNC0408	-1.72146	0.0875186	no change	10	3	14	30	5	29
StLNC2664	-1.71362	0.094307	no change	1	2	8	6	6	12
StLNC0877	-1.70378	0.44078	no change	12	14	0	32	0	45
StLNC0290	-1.69767	0.652934	no change	0	0	11	0	0	21
StLNC2105	-1.69746	0.349489	no change	0	11	2	10	21	1
StLNC0881	-1.68726	0.301099	no change	11	10	16	19	62	0
StLNC1633	-1.68122	0.389877	no change	6	0	0	6	3	8
StLNC1491	-1.67469	0.617425	no change	0	0	234	0	192	207
StLNC1704	-1.65299	0.233503	no change	1	2	2	2	1	9
StLNC2825	-1.65257	0.184544	no change	4	4	47	26	61	10
StLNC2012	-1.64819	0.0875463	no change	5	7	25	12	45	16
StLNC0736	-1.64622	0.0725947	no change	5	4	4	13	12	5
StLNC1674	-1.64192	0.294386	no change	5	0	6	12	10	1
StLNC1742	-1.63925	0.567292	no change	0	4	4	17	0	0
StLNC0790	-1.63102	0.366532	no change	1	0	15	2	3	25
StLNC2585	-1.62623	0.242363	no change	0	1	4	3	3	4
StLNC2640	-1.61242	0.471816	no change	31	3	0	86	3	1
StLNC2268	-1.60826	0.312673	no change	6	2	0	13	2	6
StLNC0170	-1.60598	0.66874	no change	0	0	20	0	30	0
StLNC0021	-1.60519	0.323889	no change	0	7	69	22	72	33
StLNC1880	-1.60481	0.559812	no change	5	0	0	5	0	9
StLNC0197	-1.59472	0.236936	no change	5	0	5	11	7	3
StLNC1422	-1.59128	0.671691	no change	0	12	0	0	0	34
StLNC2612	-1.57962	0.291049	no change	5	7	0	18	8	4
StLNC1136	-1.57813	0.0387685	down	9	16	33	49	47	19
StLNC0322	-1.56964	0.0775391	no change	2	5	5	11	5	10
StLNC1549	-1.56216	0.614886	no change	35	0	0	24	0	74
StLNC0600	-1.56102	0.073404	no change	16	17	6	18	38	37
StLNC2172	-1.55865	0.289391	no change	21	0	27	23	54	17
StLNC0255	-1.55471	0.176035	no change	25	12	29	90	41	5
StLNC0763	-1.54768	0.042698	down	10	9	12	18	34	13
StLNC2584	-1.54596	0.295944	no change	15	2	1	17	23	3
StLNC0083	-1.54537	0.426549	no change	0	5	0	4	5	3
StLNC1350	-1.53665	0.57427	no change	0	4	0	0	4	6
StLNC1652	-1.53279	0.336048	no change	53	0	17	54	67	38
StLNC1262	-1.52128	0.519519	no change	27	3	0	38	0	41
StLNC1744	-1.51846	0.124813	no change	280	87	331	760	514	108
StLNC1687	-1.51486	0.252677	no change	14	79	28	28	15	249
StLNC0019	-1.5076	0.623691	no change	33	0	0	0	40	44
StLNC1528	-1.50632	0.609541	no change	0	0	10	14	1	0
StLNC2388	-1.50525	0.295492	no change	22	0	29	43	37	17
StLNC0742	-1.50324	0.592902	no change	0	6	0	0	10	4
StLNC0094	-1.49845	0.000753947	down	449	800	753	1426	1289	1478
StLNC0608	-1.49162	0.696163	no change	0	0	6	0	0	10
StLNC2373	-1.49019	0.691153	no change	0	14	0	0	0	37
StLNC2250	-1.48864	0.0435567	down	9	8	23	29	32	14
StLNC1552	-1.48448	0.181173	no change	27	3	30	11	55	53
StLNC1220	-1.48421	0.347106	no change	10	4	7	29	14	0
StLNC0430	-1.48085	0.0338539	down	8	12	16	32	25	14
StLNC0194	-1.47123	0.00011821	down	249	307	342	553	662	621
StLNC0761	-1.47005	0.27188	no change	11	0	9	21	9	10
StLNC2700	-1.46894	0.612391	no change	0	0	30	14	0	33
StLNC1013	-1.46776	0.369405	no change	1	1	5	6	6	0
StLNC1089	-1.46704	0.459694	no change	0	2	6	10	0	4
StLNC1830	-1.46305	0.4707	no change	0	0	30	12	18	14
StLNC1658	-1.45983	0.0280822	down	7	6	13	18	19	13
StLNC2843	-1.45659	0.041408	down	7	25	29	44	42	31
StLNC2762	-1.45593	0.618805	no change	3	2	0	0	11	0
StLNC0048	-1.45075	0.546801	no change	0	0	15	1	1	22
StLNC1146	-1.44465	0.31132	no change	0	25	45	32	32	62
StLNC2484	-1.44329	0.437715	no change	0	0	10	4	6	5
StLNC1983	-1.43847	0.14985	no change	6	5	2	14	6	8
StLNC0258	-1.43683	0.0706947	no change	38	21	75	76	127	37
StLNC0212	-1.4167	0.00160777	down	39	42	64	73	78	132
StLNC0713	-1.41393	0.258153	no change	0	3	10	8	5	9
StLNC0818	-1.39869	0.460322	no change	4	66	89	118	0	179
StLNC2617	-1.39665	0.544334	no change	1	2	1	8	0	0
StLNC0325	-1.39636	0.028545	down	29	29	25	61	66	37
StLNC2032	-1.38984	0.609609	no change	0	0	11	0	6	10
StLNC2564	-1.38717	0.516984	no change	0	0	15	10	1	11
StLNC0619	-1.38317	0.1221	no change	20	5	62	58	41	45
StLNC2366	-1.38188	0.509933	no change	10	0	15	23	19	0
StLNC2624	-1.37668	0.515779	no change	8	5	0	15	13	0
StLNC1494	-1.36854	0.126776	no change	2	8	11	10	18	9
StLNC0287	-1.36554	0.71996	no change	0	0	7	0	9	0
StLNC1113	-1.36471	0.164237	no change	5	15	10	24	26	6
StLNC0966	-1.35668	0.00582991	down	14	19	34	39	42	39
StLNC2266	-1.35578	0.491913	no change	0	3	8	12	0	6
StLNC1057	-1.3522	0.0602842	no change	10	31	30	27	41	65
StLNC0588	-1.35215	0.636579	no change	11	0	0	0	12	13
StLNC0595	-1.34909	0.664805	no change	0	25	0	0	5	54
StLNC1505	-1.34796	0.187925	no change	14	9	5	32	17	7
StLNC0320	-1.34782	0.225518	no change	2	3	4	3	10	3
StLNC1960	-1.34596	0.423298	no change	2	1	2	0	7	2
StLNC2666	-1.33972	0.52785	no change	7	3	0	0	6	17
StLNC2347	-1.33147	0.0911762	no change	4	6	5	11	8	9
StLNC2443	-1.32862	0.135589	no change	7	7	8	20	15	5
StLNC0740	-1.32734	0.0334407	down	13	19	27	42	40	22
StLNC1474	-1.32498	0.0625478	no change	39	33	45	35	54	135
StLNC0699	-1.31401	0.085125	no change	55	56	97	53	79	252
StLNC2778	-1.31219	0.0946767	no change	37	27	40	70	91	24
StLNC0535	-1.30717	0.0462371	down	144	46	151	248	159	206
StLNC1278	-1.30597	0.108783	no change	5	6	7	13	13	6
StLNC1835	-1.29917	0.219885	no change	7	3	2	5	6	13
StLNC2341	-1.28611	0.669539	no change	0	0	22	26	2	0
StLNC0518	-1.28219	0.0656802	no change	17	14	62	40	37	73
StLNC1723	-1.27358	0.311206	no change	0	10	11	15	9	11
StLNC1263	-1.26837	0.105759	no change	7	5	12	11	20	9
StLNC2741	-1.26792	0.0560388	no change	8	12	18	25	25	14
StLNC2255	-1.25193	0.0817555	no change	74	73	116	201	179	59
StLNC1588	-1.25159	0.591297	no change	0	40	41	31	0	112
StLNC0757	-1.25063	0.301062	no change	4	0	8	6	6	7
StLNC0062	-1.24997	0.000714759	down	91	113	151	196	162	261
StLNC2685	-1.24271	0.664713	no change	0	0	23	19	9	0
StLNC1222	-1.2415	0.21936	no change	6	9	2	10	14	8
StLNC0368	-1.24019	0.663506	no change	6	0	0	0	9	3
StLNC0350	-1.23541	0.191404	no change	8	7	10	23	15	4
StLNC0214	-1.23453	0.248296	no change	7	3	17	5	27	9
StLNC2501	-1.23432	0.267801	no change	4	3	4	13	3	3
StLNC1156	-1.22707	0.271526	no change	31	38	4	58	23	67
StLNC1825	-1.22642	0.127217	no change	4	7	8	16	8	8
StLNC1151	-1.21426	0.562025	no change	11	0	14	18	20	0
StLNC2077	-1.21182	0.750956	no change	4	0	0	8	0	0
StLNC1035	-1.21084	0.131215	no change	25	29	57	87	67	20
StLNC2613	-1.20995	0.166725	no change	5	8	9	15	4	19
StLNC0823	-1.20578	0.711528	no change	0	0	58	0	64	2
StLNC2529	-1.20347	0.486479	no change	1	1	5	0	8	2
StLNC2523	-1.20045	0.243763	no change	3	9	14	5	8	30
StLNC0293	-1.19647	0.204568	no change	9	7	12	20	21	4
StLNC1944	-1.19499	0.559823	no change	5	0	7	0	14	4
StLNC2398	-1.18795	0.141692	no change	31	23	33	23	86	34
StLNC2647	-1.18434	0.168133	no change	5	3	7	9	10	5
StLNC1967	-1.18213	0.216405	no change	26	35	50	12	48	128
StLNC2133	-1.17985	0.090872	no change	5	10	17	21	16	13
StLNC0873	-1.17818	0.0145988	down	23	28	30	43	48	44
StLNC0544	-1.17693	0.75444	no change	10	0	0	0	0	22
StLNC1416	-1.17647	0.191301	no change	26	37	45	75	82	14
StLNC0683	-1.17406	0.55709	no change	0	5	6	5	11	0
StLNC2855	-1.16857	0.674227	no change	4	0	0	5	0	3
StLNC0203	-1.16531	0.603868	no change	14	11	0	0	9	43
StLNC2759	-1.16491	0.68675	no change	0	0	7	1	7	0
StLNC0452	-1.16213	0.549415	no change	0	3	3	5	4	0
StLNC0762	-1.15972	0.381193	no change	0	12	18	20	14	10
StLNC1669	-1.15474	0.430598	no change	5	5	11	15	16	0
StLNC2383	-1.15419	0.0813546	no change	9	6	19	16	13	24
StLNC0771	-1.15099	0.00783498	down	24	27	51	46	52	62
StLNC1441	-1.14852	0.401043	no change	46	9	11	57	55	3
StLNC1188	-1.13734	0.562665	no change	3	0	9	10	0	7
StLNC2733	-1.13387	0.444263	no change	4	0	4	2	2	9
StLNC0334	-1.1271	0.45526	no change	8	5	6	11	19	0
StLNC2645	-1.12084	0.577249	no change	3	0	7	3	0	12
StLNC0198	-1.11786	0.71498	no change	0	19	18	55	0	0
StLNC2743	-1.1164	0.21539	no change	8	6	6	6	7	21
StLNC1600	-1.11286	0.22295	no change	19	12	43	52	43	10
StLNC1229	-1.11253	0.578743	no change	89	0	16	80	97	3
StLNC0677	-1.11069	0.266763	no change	14	15	13	14	6	53
StLNC1177	-1.10997	0.0498523	down	226	208	264	450	423	224
StLNC0108	-1.10943	0.250879	no change	4	2	6	5	9	4
StLNC0201	-1.10139	0.404441	no change	6	0	13	10	11	5
StLNC2104	-1.10085	0.574255	no change	0	2	4	3	5	0
StLNC1037	-1.08775	0.607766	no change	0	4	1	5	3	0
StLNC2602	-1.08281	0.0349755	down	57	60	116	129	133	79
StLNC1079	-1.07906	0.0791094	no change	8	9	17	20	12	19
StLNC2120	-1.07813	0.546435	no change	4	12	0	3	2	26
StLNC1897	-1.06884	0.574619	no change	0	3	4	0	5	5
StLNC0861	-1.06496	0.43044	no change	90	102	2	134	95	124
StLNC0501	-1.06264	0.402075	no change	4	0	11	8	6	6
StLNC1584	-1.06173	0.316751	no change	11	5	32	43	14	7
StLNC2396	-1.04676	0.311369	no change	4	3	8	10	9	2
StLNC1941	-1.0429	0.710956	no change	0	0	21	12	0	12
StLNC0447	-1.03937	0.107446	no change	15	9	19	25	23	15
StLNC2682	-1.03873	0.494937	no change	40	1	24	72	22	4
StLNC0978	-1.03608	0.630979	no change	14	0	26	0	33	20
StLNC2712	-1.0245	0.48991	no change	7	4	6	16	9	0
StLNC1343	-1.02297	0.0273465	down	53	81	126	134	133	102
StLNC1672	-1.02149	0.398502	no change	10	11	100	16	21	117
StLNC1906	-1.02133	0.20735	no change	4	5	16	7	13	14
StLNC2593	-1.01829	0.449303	no change	3	10	120	15	51	90
StLNC1221	-1.01744	0.19985	no change	8	13	12	27	12	10
StLNC1551	-1.01699	0.566076	no change	11	19	85	30	105	0
StLNC1384	-1.00852	0.422073	no change	23	1	7	21	18	10
StLNC1957	-1.00827	0.612635	no change	0	6	4	8	6	0
StLNC0973	-1.00548	0.611728	no change	0	8	7	11	0	11
StLNC0384	-1.00547	0.328157	no change	15	8	8	23	20	4
StLNC0636	-1.00188	0.395913	no change	10	1	5	11	3	11
StLNC1058	-1.00123	0.168542	no change	4	7	17	14	11	13
StLNC0569	-0.998133	0.657938	no change	28	0	29	20	0	66
StLNC0590	-0.997062	0.650248	no change	0	24	20	25	34	0
StLNC1147	-0.996622	0.454225	no change	0	12	12	7	15	11
StLNC0040	-0.994427	0.302501	no change	32	4	27	44	25	22
StLNC2594	-0.993851	0.204678	no change	12	13	27	17	11	47
StLNC0820	-0.990069	0.0998067	no change	20	19	47	48	42	26
StLNC1678	-0.989849	0.792044	no change	0	14	0	0	22	0
StLNC1329	-0.988832	0.650546	no change	5	2	0	10	0	2
StLNC1438	-0.97883	0.0774729	no change	75	61	108	146	123	72
StLNC1923	-0.978205	0.744984	no change	8	2	0	0	16	0
StLNC0477	-0.971847	0.306509	no change	19	18	31	12	13	76
StLNC1005	-0.971526	0.288391	no change	10	15	9	21	5	27
StLNC0586	-0.969366	0.0261622	no change	123	144	174	254	203	173
StLNC0944	-0.968127	0.11659	no change	9	12	19	20	21	14
StLNC1235	-0.965491	0.267021	no change	6	2	7	8	6	7
StLNC0392	-0.957869	0.555217	no change	3	4	0	3	1	8
StLNC0907	-0.951042	0.372026	no change	3	3	3	7	2	4
StLNC2684	-0.947931	0.309705	no change	4	10	18	19	17	5
StLNC1081	-0.947586	0.522181	no change	5	8	0	4	11	6
StLNC1838	-0.944032	0.652859	no change	0	0	28	7	5	18
StLNC2447	-0.943522	0.581813	no change	3	1	1	2	0	6
StLNC0064	-0.942349	0.159227	no change	19	19	28	36	38	16
StLNC0143	-0.940341	0.636144	no change	0	4	2	3	0	6
StLNC0620	-0.939585	0.13547	no change	35	45	75	96	72	38
StLNC2004	-0.939008	0.259566	no change	15	63	153	112	86	86
StLNC0880	-0.938765	0.393512	no change	1	4	6	3	3	9
StLNC0516	-0.930136	0.25367	no change	4	5	7	10	5	7
StLNC1436	-0.927989	0.803843	no change	0	0	60	0	56	0
StLNC0442	-0.927342	0.259442	no change	8	5	5	7	10	9
StLNC0700	-0.926646	0.174089	no change	26	12	51	30	50	34
StLNC2487	-0.925355	0.307828	no change	18	16	14	34	27	7
StLNC1865	-0.921693	0.12716	no change	59	45	97	121	92	52
StLNC0576	-0.918062	0.24969	no change	8	5	12	14	13	6
StLNC1785	-0.913658	0.183681	no change	12	8	19	10	22	20
StLNC0603	-0.913558	0.523176	no change	25	0	44	33	24	29
StLNC1950	-0.910525	0.15846	no change	9	7	12	11	14	13
StLNC1656	-0.910303	0.643483	no change	6	12	31	0	55	1
StLNC2760	-0.90526	0.366992	no change	40	7	14	36	15	42
StLNC2339	-0.896054	0.810602	no change	29	0	0	47	0	0
StLNC1795	-0.891875	0.813766	no change	0	0	11	0	0	12
StLNC0959	-0.888627	0.160609	no change	70	62	131	82	65	207
StLNC0165	-0.878813	0.297226	no change	203	789	295	401	676	795
StLNC2748	-0.878544	0.062308	no change	38	28	66	52	45	76
StLNC1873	-0.877515	0.262291	no change	44	154	155	170	69	239
StLNC1287	-0.868868	0.508219	no change	8	53	9	61	34	6
StLNC1879	-0.866475	0.277655	no change	4	7	14	7	8	17
StLNC2279	-0.861919	0.378415	no change	8	9	10	4	7	27
StLNC0107	-0.857456	0.426193	no change	8	10	3	6	5	21
StLNC0883	-0.857088	0.15908	no change	20	9	25	22	24	24
StLNC0946	-0.857087	0.0749815	no change	41	63	74	79	88	65
StLNC0548	-0.856224	0.453784	no change	6	2	3	8	5	2
StLNC0996	-0.854402	0.29073	no change	8	7	5	7	9	12
StLNC1953	-0.851474	0.213988	no change	20	38	32	54	41	24
StLNC2605	-0.849648	0.345128	no change	2	8	7	8	8	6
StLNC0711	-0.844971	0.694984	no change	4	4	4	16	0	0
StLNC1751	-0.843599	0.600158	no change	19	29	14	44	40	0
StLNC1794	-0.83744	0.780207	no change	0	3	23	26	0	0
StLNC0365	-0.837018	0.375995	no change	2	6	13	13	6	6
StLNC2101	-0.834566	0.38814	no change	5	2	8	3	6	10
StLNC0105	-0.829281	0.703156	no change	0	15	3	9	0	18
StLNC0618	-0.825365	0.288623	no change	27	13	39	56	22	20
StLNC0366	-0.824985	0.585207	no change	0	43	20	28	21	36
StLNC0775	-0.822057	0.208743	no change	87	206	393	175	328	313
StLNC2253	-0.821333	0.720419	no change	42	0	16	49	0	34
StLNC1898	-0.819103	0.690152	no change	0	3	15	10	8	0
StLNC0185	-0.817559	0.721207	no change	0	39	0	26	8	26
StLNC0263	-0.817501	0.697033	no change	0	8	0	6	2	4
StLNC0774	-0.816771	0.7126	no change	1	5	0	7	0	2
StLNC1583	-0.806638	0.518911	no change	4	1	5	2	8	2
StLNC0168	-0.795442	0.572722	no change	33	37	3	13	8	95
StLNC1599	-0.794156	0.470159	no change	2	6	5	5	9	2
StLNC1889	-0.79173	0.785253	no change	0	7	0	8	2	0
StLNC1904	-0.788559	0.185204	no change	11	19	33	23	30	22
StLNC2278	-0.787918	0.295566	no change	33	39	22	27	32	72
StLNC1124	-0.787008	0.704848	no change	0	8	20	17	12	0
StLNC0221	-0.780943	0.326264	no change	52	50	18	57	50	62
StLNC1668	-0.776756	0.373977	no change	24	12	41	45	34	10
StLNC0538	-0.77241	0.431649	no change	4	4	5	3	9	4
StLNC2746	-0.772324	0.837187	no change	0	0	21	0	0	21
StLNC1768	-0.772241	0.733452	no change	0	10	55	0	16	52
StLNC0643	-0.769838	0.386277	no change	4	3	16	8	6	12
StLNC0014	-0.769104	0.244062	no change	11	17	17	13	25	18
StLNC0289	-0.768369	0.335455	no change	311	273	120	445	194	345
StLNC1292	-0.767103	0.384677	no change	14	8	28	31	19	7
StLNC2637	-0.762147	0.635266	no change	0	37	59	67	24	14
StLNC0733	-0.757115	0.226235	no change	13	11	15	16	19	13
StLNC0545	-0.756253	0.318019	no change	8	8	8	13	10	7
StLNC1874	-0.754796	0.842647	no change	0	0	9	8	0	0
StLNC1169	-0.75444	0.24718	no change	145	155	233	320	211	105
StLNC2588	-0.753417	0.798805	no change	0	6	21	27	0	0
StLNC1415	-0.750539	0.72298	no change	9	3	0	11	0	7
StLNC2037	-0.748708	0.817904	no change	0	26	0	1	0	40
StLNC0968	-0.745567	0.803197	no change	23	0	0	0	19	15
StLNC0848	-0.739782	0.353669	no change	16	27	36	48	32	12
StLNC0854	-0.736748	0.445125	no change	8	11	3	11	6	13
StLNC0213	-0.735512	0.363351	no change	22	15	25	17	11	51
StLNC1671	-0.734766	0.622308	no change	4	0	23	12	10	4
StLNC1071	-0.73388	0.675927	no change	87	91	0	129	86	37
StLNC1009	-0.732158	0.555299	no change	3	3	2	6	3	1
StLNC2765	-0.731262	0.717649	no change	0	61	11	47	44	1
StLNC0671	-0.7307	0.386911	no change	24	13	27	30	36	9
StLNC1408	-0.725184	0.734358	no change	0	3	39	36	1	1
StLNC0813	-0.723039	0.347485	no change	11	16	19	11	30	13
StLNC0233	-0.722072	0.848869	no change	0	0	11	0	9	0
StLNC0585	-0.720651	0.734772	no change	3	3	3	11	0	0
StLNC2586	-0.718701	0.611933	no change	5	4	8	8	11	0
StLNC1798	-0.710489	0.232626	no change	38	48	31	43	48	58
StLNC1808	-0.705007	0.144367	no change	252	148	333	256	217	400
StLNC2732	-0.702983	0.483951	no change	3	3	4	5	2	5
StLNC0195	-0.701887	0.381921	no change	11	5	19	19	12	8
StLNC1234	-0.69996	0.396748	no change	3	7	7	6	7	7
StLNC0889	-0.698453	0.473983	no change	2	6	7	7	7	3
StLNC0480	-0.697629	0.208322	no change	42	86	117	86	65	135
StLNC2236	-0.686974	0.821467	no change	8	0	1	12	0	0
StLNC0805	-0.681302	0.49213	no change	17	23	14	13	7	51
StLNC0922	-0.680086	0.55339	no change	1	4	12	7	2	9
StLNC1956	-0.679779	0.811864	no change	9	0	0	8	0	5
StLNC1935	-0.678378	0.739881	no change	8	0	5	10	5	0
StLNC1297	-0.677036	0.339316	no change	14	8	20	17	20	10
StLNC2148	-0.673962	0.276266	no change	64	25	65	51	49	82
StLNC1643	-0.673793	0.213497	no change	115	112	158	89	134	235
StLNC1208	-0.673137	0.810976	no change	2	0	5	7	0	0
StLNC2520	-0.671861	0.649402	no change	202	122	244	135	479	3
StLNC2081	-0.671289	0.759523	no change	3	14	0	0	8	16
StLNC0114	-0.670927	0.413457	no change	9	6	15	7	18	8
StLNC0100	-0.670393	0.211531	no change	22	17	33	35	22	25
StLNC1809	-0.669686	0.252331	no change	102	59	150	139	130	76
StLNC1325	-0.662793	0.465767	no change	31	93	138	27	95	171
StLNC0779	-0.66076	0.491041	no change	5	6	3	7	6	4
StLNC1258	-0.653704	0.254441	no change	13	17	31	16	21	31
StLNC1176	-0.653076	0.198238	no change	137	235	247	199	178	350
StLNC2274	-0.653067	0.548808	no change	2	2	4	3	2	4
StLNC0297	-0.652638	0.217057	no change	20	28	33	34	33	25
StLNC2152	-0.651575	0.489178	no change	8	3	8	3	8	11
StLNC0298	-0.647469	0.82869	no change	22	0	0	0	19	11
StLNC0846	-0.646475	0.501129	no change	14	4	48	20	29	15
StLNC0448	-0.645334	0.409574	no change	5	4	10	6	6	9
StLNC1111	-0.643864	0.562343	no change	7	11	20	27	11	2
StLNC2292	-0.64385	0.282902	no change	140	111	200	222	183	93
StLNC0123	-0.642242	0.700416	no change	1	2	18	17	1	1
StLNC0776	-0.64146	0.378233	no change	56	96	153	135	141	47
StLNC1574	-0.639835	0.644534	no change	1	7	2	1	7	4
StLNC2654	-0.639687	0.633382	no change	7	54	7	50	5	34
StLNC0933	-0.639408	0.846143	no change	49	0	0	0	3	71
StLNC2422	-0.639371	0.401015	no change	15	25	103	43	42	56
StLNC2853	-0.637739	0.807007	no change	0	1	66	4	0	57
StLNC1078	-0.634409	0.71949	no change	1	73	110	56	1	144
StLNC1772	-0.634203	0.708252	no change	0	106	148	109	110	36
StLNC1586	-0.631045	0.567597	no change	2	3	3	4	3	2
StLNC2170	-0.627257	0.801926	no change	0	48	37	4	83	0
StLNC2288	-0.62339	0.308804	no change	13	20	26	30	18	17
StLNC0682	-0.623206	0.437877	no change	29	50	72	81	60	19
StLNC2458	-0.620559	0.468891	no change	8	8	14	13	15	4
StLNC2616	-0.619972	0.262198	no change	123	206	203	242	214	139
StLNC1347	-0.616556	0.41519	no change	9	6	30	14	17	14
StLNC2708	-0.611722	0.307892	no change	80	43	63	93	56	66
StLNC1540	-0.61079	0.67023	no change	17	0	39	15	24	15
StLNC2451	-0.607786	0.486229	no change	9	23	9	11	13	26
StLNC2149	-0.603402	0.625525	no change	11	22	40	58	2	16
StLNC1973	-0.599124	0.643692	no change	8	0	9	6	6	6
StLNC2736	-0.597881	0.492011	no change	20	32	28	18	12	65
StLNC1404	-0.593438	0.414652	no change	11	7	17	7	12	19
StLNC2015	-0.587678	0.596307	no change	4	2	3	5	3	2
StLNC1814	-0.585969	0.275365	no change	43	29	70	67	40	43
StLNC1778	-0.584295	0.5694	no change	8	8	10	17	9	2
StLNC2793	-0.583307	0.783295	no change	0	18	9	10	0	22
StLNC0025	-0.578811	0.522723	no change	10	6	5	9	10	5
StLNC0954	-0.578746	0.853658	no change	0	37	0	39	7	0
StLNC2290	-0.578096	0.550473	no change	11	33	16	43	10	16
StLNC1979	-0.574467	0.54295	no change	4	6	8	11	5	3
StLNC1776	-0.569658	0.389116	no change	9	12	13	16	10	11
StLNC0056	-0.569051	0.809122	no change	61	0	46	0	75	39
StLNC0440	-0.562544	0.7563	no change	39	98	29	0	151	38
StLNC2728	-0.561428	0.881276	no change	0	0	22	0	0	19
StLNC2014	-0.561132	0.725206	no change	31	44	56	0	53	91
StLNC2650	-0.560298	0.202907	no change	96	90	189	109	100	185
StLNC1610	-0.557416	0.737921	no change	33	1	38	10	1	69
StLNC2735	-0.554132	0.340828	no change	20	37	68	35	51	39
StLNC1107	-0.553997	0.463388	no change	24	14	14	12	19	29
StLNC1254	-0.552096	0.700192	no change	4	8	6	10	9	0
StLNC1190	-0.551379	0.577637	no change	7	11	10	5	4	23
StLNC1954	-0.550964	0.39946	no change	9	16	26	12	22	18
StLNC1917	-0.549402	0.627884	no change	8	3	15	18	2	6
StLNC1361	-0.547974	0.846994	no change	0	8	0	0	5	5
StLNC0974	-0.5473	0.884833	no change	0	0	14	0	0	12
StLNC1570	-0.547054	0.513794	no change	35	19	11	24	20	34
StLNC2218	-0.541548	0.793984	no change	6	8	0	0	7	11
StLNC0623	-0.535964	0.3076	no change	34	32	49	44	24	55
StLNC0381	-0.531393	0.489543	no change	26	19	35	45	25	12
StLNC2508	-0.53115	0.562375	no change	9	4	12	3	10	13
StLNC0462	-0.530757	0.35769	no change	26	26	31	41	20	28
StLNC2740	-0.529314	0.76249	no change	290	4	8	100	22	283
StLNC2316	-0.528462	0.362712	no change	35	35	113	52	45	81
StLNC0587	-0.520591	0.88917	no change	0	44	0	0	50	0
StLNC1607	-0.52021	0.390336	no change	30	30	38	22	27	57
StLNC1532	-0.519788	0.830972	no change	62	0	167	0	87	123
StLNC0121	-0.513757	0.794896	no change	0	6	3	4	0	6
StLNC0816	-0.512791	0.518006	no change	12	26	29	26	31	10
StLNC2633	-0.508472	0.762449	no change	0	114	88	97	27	85
StLNC0080	-0.50576	0.618766	no change	8	3	5	9	5	3
StLNC0251	-0.505412	0.763058	no change	32	32	0	30	7	45
StLNC1716	-0.502852	0.57767	no change	13	8	20	6	25	9
StLNC2294	-0.502358	0.89434	no change	8	0	0	0	0	11
StLNC2768	-0.499452	0.543297	no change	23	28	46	54	30	11
StLNC2780	-0.49886	0.804089	no change	953	740	1037	689	2003	0
StLNC2655	-0.498415	0.826752	no change	0	25	6	0	6	31
StLNC0697	-0.492628	0.61758	no change	2	9	11	10	3	9
StLNC1987	-0.490807	0.740039	no change	10	0	11	2	8	11
StLNC2056	-0.488612	0.192315	no change	105	99	168	121	137	114
StLNC1237	-0.487077	0.815148	no change	60	370	40	0	452	66
StLNC2112	-0.480385	0.556597	no change	14	6	22	12	20	8
StLNC1242	-0.479659	0.880611	no change	0	54	16	0	0	84
StLNC1504	-0.479405	0.80652	no change	7	0	9	7	0	9
StLNC0476	-0.477009	0.560062	no change	10	12	20	12	5	26
StLNC2127	-0.476181	0.815901	no change	4	3	0	4	4	0
StLNC0042	-0.4735	0.286889	no change	52	62	120	85	76	64
StLNC0300	-0.472005	0.690526	no change	9	9	31	25	1	20
StLNC2475	-0.470919	0.794287	no change	42	0	25	57	6	6
StLNC1569	-0.467971	0.812873	no change	0	4	5	2	0	7
StLNC0743	-0.467017	0.221155	no change	63	76	133	77	93	95
StLNC2592	-0.466978	0.875938	no change	0	24	0	0	17	11
StLNC0284	-0.463884	0.754962	no change	5	5	18	8	16	0
StLNC0027	-0.460699	0.626851	no change	1202	134	1487	1158	718	831
StLNC0029	-0.460291	0.380015	no change	27	27	48	42	32	25
StLNC2007	-0.458338	0.611087	no change	38	132	74	121	28	112
StLNC0524	-0.456335	0.785852	no change	4	1	21	14	0	8
StLNC2217	-0.454773	0.699363	no change	39	39	9	60	6	35
StLNC2124	-0.453661	0.434991	no change	170	154	265	235	225	107
StLNC0188	-0.450832	0.335095	no change	26	28	59	30	36	42
StLNC0715	-0.450094	0.825283	no change	9	0	16	15	0	8
StLNC1125	-0.449432	0.762751	no change	2	2	4	0	2	6
StLNC2630	-0.448725	0.290763	no change	71	111	122	100	84	122
StLNC1460	-0.447944	0.348302	no change	38	48	83	44	43	78
StLNC1755	-0.44537	0.635545	no change	33	20	89	20	81	22
StLNC2038	-0.444304	0.63696	no change	12	32	34	7	21	51
StLNC2155	-0.44317	0.419223	no change	113	152	174	179	159	93
StLNC1154	-0.442012	0.591417	no change	171	97	55	128	72	165
StLNC2573	-0.432629	0.528978	no change	30	23	65	17	38	56
StLNC2407	-0.43246	0.685841	no change	13	2	5	8	7	6
StLNC1486	-0.423669	0.699057	no change	3	6	7	2	10	3
StLNC2258	-0.422137	0.774983	no change	12	0	16	12	10	3
StLNC1555	-0.421177	0.539049	no change	12	10	14	14	13	8
StLNC2822	-0.414238	0.364863	no change	459	410	769	399	395	793
StLNC0756	-0.413357	0.823256	no change	0	513	936	405	361	487
StLNC1630	-0.409606	0.731058	no change	30	131	11	34	53	110
StLNC2739	-0.406466	0.868509	no change	0	39	2	31	13	0
StLNC2469	-0.404171	0.78025	no change	12	6	14	0	9	23
StLNC0550	-0.400359	0.641099	no change	7	28	12	17	14	17
StLNC1299	-0.397677	0.839947	no change	6	0	4	6	0	4
StLNC0265	-0.396951	0.897384	no change	1	0	23	17	0	0
StLNC2614	-0.394699	0.68209	no change	4	4	7	8	3	3
StLNC0446	-0.39343	0.535074	no change	14	22	45	30	25	17
StLNC1250	-0.392133	0.591798	no change	17	19	23	8	19	31
StLNC1912	-0.390897	0.656989	no change	15	6	18	7	7	24
StLNC0020	-0.385386	0.339067	no change	52	57	93	73	57	58
StLNC2049	-0.38119	0.776001	no change	6	4	10	9	0	10
StLNC1986	-0.378049	0.646579	no change	16	6	16	8	8	21
StLNC2397	-0.37573	0.801479	no change	6	3	15	14	6	0
StLNC0455	-0.37344	0.481157	no change	17	19	36	26	16	24
StLNC2064	-0.372295	0.89914	no change	8	9	0	0	0	21
StLNC2430	-0.371997	0.508277	no change	108	105	263	181	142	92
StLNC1918	-0.370386	0.869943	no change	2	0	14	0	1	12
StLNC0330	-0.36856	0.766727	no change	2	6	2	6	2	2
StLNC1845	-0.368478	0.643788	no change	8	10	11	9	13	5
StLNC1214	-0.367653	0.882342	no change	0	1	66	19	25	0
StLNC0286	-0.364775	0.418661	no change	96	142	214	140	155	113
StLNC0735	-0.36429	0.447817	no change	64	116	132	114	87	89
StLNC1868	-0.361419	0.863154	no change	6	0	14	13	3	0
StLNC1870	-0.360228	0.89868	no change	6	0	10	0	0	15
StLNC0154	-0.360167	0.604414	no change	20	34	53	33	44	17
StLNC0793	-0.356234	0.627253	no change	22	31	23	12	33	29
StLNC0303	-0.35605	0.893087	no change	7	46	0	0	1	63
StLNC0956	-0.35413	0.899558	no change	0	0	10	5	0	2
StLNC1159	-0.353455	0.889513	no change	45	0	0	29	19	1
StLNC2114	-0.351471	0.730592	no change	38	37	11	42	35	11
StLNC2082	-0.350691	0.533814	no change	55	73	101	74	88	44
StLNC2232	-0.350354	0.744939	no change	20	19	3	9	18	18
StLNC1015	-0.348747	0.696309	no change	17	7	36	20	23	7
StLNC0471	-0.347747	0.542898	no change	79	63	72	49	89	66
StLNC1407	-0.347047	0.497907	no change	25	37	35	32	26	34
StLNC2709	-0.345678	0.547225	no change	495	189	505	349	342	417
StLNC0551	-0.339813	0.880347	no change	0	38	41	0	19	53
StLNC2634	-0.33844	0.640352	no change	23	29	44	44	28	13
StLNC1498	-0.335752	0.606715	no change	29	35	89	64	36	29
StLNC2021	-0.334857	0.601788	no change	23	21	24	22	27	14
StLNC1320	-0.33417	0.61184	no change	8	13	27	12	11	19
StLNC0138	-0.333627	0.831569	no change	63	9	48	1	92	13
StLNC0268	-0.332989	0.610423	no change	37	34	70	27	26	76
StLNC0245	-0.332665	0.823779	no change	5	12	14	20	7	0
StLNC1913	-0.330469	0.657058	no change	5	8	14	6	7	11
StLNC1257	-0.324058	0.506772	no change	239	175	233	147	203	262
StLNC2642	-0.323771	0.911017	no change	0	0	18	2	0	11
StLNC2342	-0.315866	0.568859	no change	17	14	31	17	14	24
StLNC0965	-0.31582	0.9185	no change	10	0	52	0	42	0
StLNC1193	-0.311846	0.825164	no change	3	2	5	0	3	6
StLNC2107	-0.308944	0.794268	no change	6	2	10	9	5	1
StLNC1341	-0.308125	0.842974	no change	22	0	32	6	27	11
StLNC0886	-0.30554	0.884845	no change	4	11	0	0	8	8
StLNC1000	-0.30028	0.920036	no change	13	5	0	0	18	0
StLNC0625	-0.298874	0.897017	no change	0	1	28	0	13	6
StLNC0748	-0.297793	0.597117	no change	54	69	116	103	46	58
StLNC1899	-0.297514	0.707532	no change	33	19	37	13	17	53
StLNC1368	-0.296863	0.78962	no change	50	4	28	41	19	16
StLNC0008	-0.294524	0.918498	no change	0	4	15	0	13	0
StLNC1259	-0.293756	0.842063	no change	2	2	3	3	3	0
StLNC1996	-0.291829	0.704367	no change	8	6	27	13	10	10
StLNC1747	-0.290058	0.788774	no change	285	310	241	28	418	341
StLNC0649	-0.287564	0.799227	no change	6	2	5	5	1	6
StLNC2092	-0.287562	0.741112	no change	44	17	44	18	15	65
StLNC0555	-0.286409	0.74178	no change	12	13	46	14	8	37
StLNC1526	-0.282321	0.699584	no change	27	8	32	23	17	18
StLNC1527	-0.281582	0.84282	no change	2	2	4	4	0	3
StLNC0319	-0.278326	0.890814	no change	0	10	17	0	8	14
StLNC1369	-0.276674	0.725182	no change	21	6	24	12	11	22
StLNC2399	-0.271561	0.690499	no change	56	34	102	65	64	28
StLNC0986	-0.269076	0.608128	no change	29	20	37	24	19	33
StLNC2128	-0.267639	0.848498	no change	6	3	4	0	6	6
StLNC2306	-0.264787	0.882585	no change	3	1	12	1	0	12
StLNC0791	-0.264364	0.63751	no change	21	17	37	19	26	18
StLNC1806	-0.263247	0.848916	no change	3	2	4	4	0	4
StLNC0005	-0.2615	0.795428	no change	27	25	28	27	38	4
StLNC0451	-0.25375	0.805222	no change	2	4	7	3	2	6
StLNC0459	-0.251361	0.79369	no change	3	5	7	4	2	7
StLNC0967	-0.248332	0.595807	no change	37	51	75	37	39	64
StLNC0160	-0.246973	0.727654	no change	11	21	16	9	15	19
StLNC0468	-0.243444	0.875679	no change	10	20	21	36	0	8
StLNC1638	-0.243251	0.769145	no change	12	4	15	12	7	7
StLNC2022	-0.241463	0.916335	no change	34	0	76	33	46	0
StLNC0352	-0.239155	0.705868	no change	10	10	15	11	8	11
StLNC1958	-0.239135	0.721289	no change	46	16	42	34	23	34
StLNC1326	-0.237249	0.76514	no change	8	6	9	9	4	7
StLNC2035	-0.237148	0.733127	no change	18	24	58	29	34	15
StLNC0091	-0.237051	0.876531	no change	25	8	15	0	15	30
StLNC0705	-0.233887	0.918911	no change	21	13	0	29	5	0
StLNC1781	-0.233082	0.824627	no change	20	33	60	44	40	4
StLNC2361	-0.224261	0.903202	no change	22	161	247	165	156	0
StLNC2009	-0.223766	0.730118	no change	12	10	18	12	7	15
StLNC0656	-0.221861	0.870628	no change	5	7	9	9	8	0
StLNC0012	-0.221395	0.780288	no change	27	29	32	25	39	10
StLNC2833	-0.221025	0.733829	no change	21	11	39	17	14	27
StLNC1815	-0.213707	0.955016	no change	8	0	0	0	0	9
StLNC0078	-0.212125	0.734632	no change	19	28	79	29	36	31
StLNC0635	-0.210908	0.822367	no change	2	6	8	5	4	4
StLNC0920	-0.208245	0.64773	no change	40	42	87	35	46	56
StLNC1414	-0.206759	0.657817	no change	24	36	55	32	30	32
StLNC0271	-0.203622	0.957059	no change	9	0	0	9	0	0
StLNC2344	-0.202782	0.755498	no change	53	67	52	31	69	50
StLNC2596	-0.202034	0.784865	no change	8	12	20	12	5	16
StLNC2606	-0.19881	0.792603	no change	52	237	165	134	99	157
StLNC1933	-0.19542	0.958786	no change	0	0	15	9	0	0
StLNC0529	-0.195081	0.740769	no change	26	40	57	44	33	22
StLNC1805	-0.193297	0.932031	no change	0	17	0	3	10	3
StLNC0349	-0.193229	0.903635	no change	1	30	65	22	1	51
StLNC0828	-0.193119	0.800921	no change	8	9	13	4	9	12
StLNC1955	-0.192336	0.791634	no change	21	16	53	12	20	39
StLNC0449	-0.18997	0.839666	no change	12	11	5	10	4	12
StLNC1597	-0.186871	0.894369	no change	9	13	16	15	15	0
StLNC1644	-0.183469	0.911342	no change	8	33	60	23	49	0
StLNC0343	-0.181686	0.837112	no change	13	83	142	56	45	81
StLNC1968	-0.178433	0.913191	no change	3	3	2	6	0	1
StLNC1758	-0.172845	0.786734	no change	10	9	23	11	9	13
StLNC1181	-0.17262	0.811654	no change	6	7	18	8	7	9
StLNC0592	-0.166416	0.835474	no change	56	75	80	80	71	19
StLNC0773	-0.164996	0.826933	no change	6	6	12	5	7	7
StLNC2482	-0.163076	0.914573	no change	2	3	9	2	0	9
StLNC1120	-0.161396	0.851048	no change	19	13	9	7	10	20
StLNC2431	-0.157554	0.88406	no change	2	14	18	4	6	17
StLNC2177	-0.156835	0.803146	no change	19	23	42	31	20	14
StLNC0494	-0.156229	0.912603	no change	12	14	9	0	13	18
StLNC2631	-0.155199	0.700022	no change	147	121	246	104	133	172
StLNC1985	-0.151174	0.885295	no change	11	29	46	29	3	36
StLNC2180	-0.14829	0.857421	no change	39	26	91	45	54	14
StLNC0994	-0.139337	0.833021	no change	13	10	35	12	16	15
StLNC0110	-0.137497	0.932678	no change	50	49	93	109	0	42
StLNC1620	-0.13672	0.890107	no change	2	4	7	3	3	4
StLNC0659	-0.136666	0.760368	no change	103	129	197	107	76	160
StLNC0892	-0.133621	0.885084	no change	9	5	36	6	14	15
StLNC1858	-0.132451	0.864916	no change	6	9	21	5	10	12
StLNC1750	-0.131587	0.97191	no change	44	0	0	42	0	0
StLNC1318	-0.129569	0.923409	no change	9	1	24	2	16	5
StLNC0809	-0.129411	0.847039	no change	16	11	33	10	13	23
StLNC1012	-0.128108	0.897133	no change	8	7	26	7	3	21
StLNC0149	-0.126742	0.823463	no change	15	15	20	12	13	15
StLNC1995	-0.123418	0.88573	no change	17	9	18	4	17	14
StLNC0606	-0.122975	0.727767	no change	174	174	300	134	175	196
StLNC2504	-0.122392	0.883264	no change	6	34	34	21	18	18
StLNC0532	-0.120993	0.906629	no change	5	2	7	3	2	6
StLNC1424	-0.116893	0.883965	no change	8	6	16	4	7	12
StLNC2001	-0.116307	0.856266	no change	19	16	29	20	19	10
StLNC0357	-0.11573	0.940696	no change	1	43	81	2	37	50
StLNC0301	-0.115169	0.854439	no change	51	75	98	84	55	33
StLNC0087	-0.11389	0.969741	no change	23	0	13	29	0	0
StLNC0669	-0.113669	0.858025	no change	63	64	104	69	76	30
StLNC1728	-0.109726	0.850501	no change	14	13	20	12	10	15
StLNC1328	-0.109454	0.886978	no change	7	18	16	8	8	17
StLNC0509	-0.106141	0.87252	no change	22	19	18	18	10	21
StLNC1844	-0.102128	0.90659	no change	7	4	10	8	4	4
StLNC1240	-0.0994902	0.927869	no change	30	17	13	8	35	6
StLNC2134	-0.0983067	0.890815	no change	39	33	119	23	42	73
StLNC2667	-0.096796	0.799707	no change	79	99	130	89	65	86
StLNC2555	-0.096386	0.843936	no change	129	114	219	102	77	180
StLNC2117	-0.0954802	0.893948	no change	11	19	20	10	8	22
StLNC2173	-0.0947064	0.949	no change	6	13	14	0	5	22
StLNC1017	-0.0932734	0.964495	no change	0	34	18	1	1	43
StLNC0358	-0.0924419	0.911508	no change	10	10	9	10	9	4
StLNC0932	-0.0923209	0.911815	no change	9	9	14	7	13	4
StLNC0161	-0.0905907	0.826258	no change	38	41	72	36	39	39
StLNC0714	-0.0899786	0.943196	no change	6	12	132	12	54	23
StLNC0806	-0.0880392	0.876661	no change	39	39	58	22	29	56
StLNC1264	-0.0876623	0.915501	no change	8	35	25	12	17	25
StLNC2551	-0.08569	0.91709	no change	6	7	11	4	9	5
StLNC0210	-0.0856583	0.965045	no change	0	6	6	6	0	3
StLNC2245	-0.0853788	0.897641	no change	19	21	53	12	23	33
StLNC0716	-0.0844152	0.920753	no change	26	10	53	25	27	10
StLNC2387	-0.0818741	0.967555	no change	0	8	4	3	0	7
StLNC1611	-0.0816269	0.919646	no change	49	38	85	19	24	91
StLNC1675	-0.0801556	0.886374	no change	17	22	45	22	22	17
StLNC1316	-0.0748958	0.936518	no change	12	17	24	8	4	30
StLNC2567	-0.0739732	0.947377	no change	2	8	4	5	4	2
StLNC1353	-0.0725018	0.96029	no change	23	40	6	5	49	3
StLNC0079	-0.0719295	0.904239	no change	64	27	92	42	36	59
StLNC0104	-0.0707129	0.98105	no change	6	0	1	6	0	0
StLNC1636	-0.0672623	0.930911	no change	13	16	27	9	7	27
StLNC2794	-0.0662865	0.922373	no change	13	15	20	16	6	15
StLNC1629	-0.0644986	0.986248	no change	0	33	0	29	0	0
StLNC0665	-0.0640296	0.958901	no change	1	3	9	1	3	5
StLNC2803	-0.0635679	0.948362	no change	5	19	48	18	6	26
StLNC1390	-0.0616798	0.923642	no change	12	14	14	11	10	10
StLNC1048	-0.0594982	0.931738	no change	11	10	14	6	8	13
StLNC2848	-0.05944	0.920021	no change	228	120	368	141	119	274
StLNC0821	-0.0592978	0.918985	no change	15	21	32	12	15	24
StLNC0561	-0.0592522	0.930452	no change	12	11	19	10	6	16
StLNC2068	-0.0583936	0.963044	no change	3	1	4	2	1	3
StLNC2215	-0.0540989	0.930339	no change	86	99	109	113	65	46
StLNC2110	-0.0526918	0.974457	no change	77	55	119	0	115	67
StLNC1207	-0.0513985	0.899838	no change	271	359	508	355	222	270
StLNC2415	-0.0510885	0.937987	no change	31	26	30	13	20	36
StLNC2125	-0.0501373	0.929513	no change	62	38	115	34	55	66
StLNC2730	-0.048559	0.982906	no change	0	52	43	0	35	35
StLNC0781	-0.047699	0.915472	no change	32	31	50	31	26	27
StLNC0055	-0.0449361	0.926353	no change	60	60	74	61	46	40
StLNC0419	-0.0444301	0.946599	no change	11	8	18	8	10	9
StLNC2797	-0.0441393	0.947173	no change	19	15	28	10	11	26
StLNC1245	-0.0438107	0.982212	no change	6	0	9	5	5	0
StLNC0340	-0.042591	0.896086	no change	574	708	1109	535	492	746
StLNC0737	-0.0391469	0.924732	no change	118	145	208	90	102	161
StLNC2129	-0.0364383	0.966913	no change	22	38	82	11	24	67
StLNC1608	-0.0362176	0.948953	no change	14	17	30	17	14	13
StLNC1439	-0.0347349	0.992678	no change	0	0	15	0	0	9
StLNC0252	-0.0321767	0.937033	no change	885	1255	1376	875	671	1135
StLNC0777	-0.0178793	0.976389	no change	19	28	39	13	27	22
StLNC0750	-0.0176025	0.962652	no change	69	83	144	69	72	70
StLNC2628	-0.0152356	0.967436	no change	115	89	152	91	77	94
StLNC1432	-0.0143385	0.971404	no change	364	270	616	237	304	352
StLNC1138	-0.0140582	0.992185	no change	0	9	9	4	2	7
StLNC1903	-0.013382	0.995051	no change	0	28	33	17	0	27
StLNC2660	-0.0121473	0.983598	no change	15	17	25	14	9	19
StLNC1952	-0.0119057	0.981088	no change	32	28	68	32	31	26
StLNC1453	-0.0116191	0.997556	no change	8	0	0	7	0	0
StLNC2265	-0.00998222	0.990242	no change	5	7	14	8	6	4
StLNC0915	-0.00913574	0.994979	no change	5	2	4	5	3	0
StLNC0993	-0.00885418	0.991107	no change	205	110	183	68	67	257
StLNC0053	-0.00849636	0.992793	no change	27	17	33	35	15	5
StLNC2672	-0.00434655	0.995179	no change	35	27	19	20	15	30
StLNC1515	0.00449413	0.998275	no change	17	0	22	11	0	17
StLNC1816	0.00589351	0.99359	no change	42	23	79	24	18	60
StLNC1558	0.00743787	0.997082	no change	4	3	0	0	3	3
StLNC0153	0.00950366	0.996314	no change	0	14	17	11	9	0
StLNC1604	0.0129894	0.993732	no change	45	69	84	112	0	31
StLNC0006	0.0150911	0.981075	no change	124	96	181	127	104	48
StLNC1166	0.0162431	0.99131	no change	4	17	14	10	14	0
StLNC0312	0.0165073	0.976037	no change	16	18	39	18	16	16
StLNC0947	0.0169086	0.993569	no change	5	11	0	0	5	9
StLNC0305	0.0173784	0.98402	no change	8	28	72	32	15	22
StLNC0703	0.0183532	0.98177	no change	21	29	36	28	25	7
StLNC1764	0.0185761	0.98182	no change	12	34	39	8	25	27
StLNC2350	0.0186087	0.971967	no change	52	56	84	39	29	72
StLNC2632	0.0220063	0.973295	no change	23	28	58	14	20	42
StLNC2714	0.0267471	0.980538	no change	8	5	2	4	3	5
StLNC2842	0.0283055	0.965555	no change	26	22	79	36	25	21
StLNC0769	0.0294406	0.982948	no change	3	7	5	0	6	5
StLNC0591	0.0334218	0.985028	no change	44	5	25	48	0	7
StLNC1759	0.0345904	0.947344	no change	379	506	588	406	400	231
StLNC0594	0.0351161	0.91522	no change	373	374	750	374	311	338
StLNC0241	0.0370456	0.961889	no change	68	102	168	37	44	160
StLNC0116	0.0411721	0.932685	no change	31	39	51	33	20	33
StLNC1783	0.0431444	0.951731	no change	12	20	22	14	6	19
StLNC2471	0.0432115	0.976274	no change	4	4	14	3	0	12
StLNC2013	0.0436088	0.984068	no change	0	22	9	18	0	5
StLNC2324	0.0473632	0.956233	no change	5	9	8	5	3	8
StLNC1907	0.0484907	0.960805	no change	7	9	8	2	4	12
StLNC0642	0.0496446	0.938268	no change	31	15	46	27	14	22
StLNC1863	0.0501571	0.966196	no change	1	5	24	5	4	9
StLNC0458	0.052194	0.91307	no change	108	117	262	75	121	128
StLNC2651	0.0549404	0.926828	no change	187	152	233	178	143	75
StLNC2050	0.0552779	0.927807	no change	13	17	18	12	11	11
StLNC1661	0.0597685	0.934135	no change	10	7	19	6	10	8
StLNC1699	0.0623976	0.964804	no change	12	18	21	17	17	0
StLNC0239	0.064646	0.95726	no change	2	2	5	3	1	2
StLNC1730	0.0653797	0.931305	no change	10	13	13	5	7	14
StLNC1509	0.0717168	0.962331	no change	4	3	11	0	9	2
StLNC1331	0.0720431	0.950401	no change	90	105	111	15	18	201
StLNC2360	0.073509	0.956507	no change	5	2	9	1	8	1
StLNC2680	0.0752947	0.928157	no change	7	4	15	7	4	6
StLNC1377	0.0815844	0.976478	no change	5	0	8	0	0	9
StLNC2677	0.0816091	0.881671	no change	49	45	42	30	27	42
StLNC1820	0.0850617	0.924844	no change	10	5	39	13	11	8
StLNC0443	0.0854146	0.898953	no change	66	72	105	38	29	105
StLNC0385	0.0908542	0.950736	no change	18	8	10	7	0	21
StLNC0127	0.0940017	0.890611	no change	131	97	246	43	137	129
StLNC0539	0.0941858	0.931624	no change	31	20	10	6	7	36
StLNC0269	0.0982778	0.855703	no change	56	79	105	33	51	80
StLNC2742	0.0983695	0.873429	no change	15	13	23	14	11	9
StLNC2462	0.101513	0.807707	no change	144	157	318	107	117	183
StLNC2599	0.107598	0.956597	no change	4	0	10	5	3	0
StLNC1142	0.11329	0.870034	no change	115	140	220	125	135	44
StLNC1431	0.113538	0.858729	no change	40	17	67	30	25	24
StLNC2409	0.114285	0.853212	no change	40	31	72	37	36	18
StLNC0383	0.114298	0.938301	no change	20	29	37	31	24	0
StLNC2171	0.114739	0.89853	no change	5	7	12	5	2	9
StLNC0260	0.123153	0.796563	no change	34	30	44	25	19	29
StLNC2668	0.123194	0.886884	no change	11	62	51	18	24	42
StLNC1421	0.124156	0.710577	no change	143	135	247	101	117	125
StLNC1493	0.12559	0.908168	no change	66	4	71	29	21	43
StLNC2517	0.125715	0.968308	no change	36	4	0	0	30	0
StLNC2721	0.127246	0.953238	no change	0	23	29	0	7	27
StLNC1335	0.12897	0.794033	no change	483	618	885	566	421	301
StLNC1919	0.12923	0.963465	no change	6	0	13	11	0	0
StLNC2317	0.130303	0.928131	no change	16	14	19	23	9	0
StLNC0142	0.131227	0.839584	no change	92	111	123	59	111	45
StLNC0634	0.133117	0.932069	no change	0	7	51	7	8	16
StLNC1887	0.134286	0.853258	no change	49	22	42	18	17	44
StLNC1685	0.136494	0.965847	no change	70	0	0	0	17	42
StLNC0827	0.138871	0.698563	no change	90	101	167	66	73	94
StLNC2261	0.139686	0.947451	no change	3	10	0	0	6	4
StLNC2470	0.139738	0.855884	no change	74	105	78	86	21	75
StLNC0096	0.141698	0.883773	no change	6	4	11	4	7	2
StLNC0613	0.144837	0.814259	no change	86	42	87	48	29	69
StLNC0169	0.149961	0.844667	no change	11	11	16	13	4	8
StLNC2011	0.152711	0.854486	no change	30	34	15	11	17	30
StLNC1866	0.15474	0.879117	no change	166	183	67	24	109	179
StLNC0086	0.155884	0.955423	no change	6	0	11	0	0	11
StLNC0547	0.156859	0.743079	no change	36	51	68	41	28	31
StLNC2090	0.157077	0.783337	no change	14	23	33	14	12	19
StLNC0433	0.160314	0.917171	no change	25	8	17	0	7	29
StLNC2689	0.163342	0.817641	no change	12	9	12	7	6	9
StLNC0926	0.16518	0.70865	no change	126	168	266	143	113	95
StLNC1639	0.16633	0.831393	no change	23	28	47	37	14	10
StLNC2587	0.167449	0.905781	no change	3	5	79	17	22	3
StLNC0464	0.168506	0.910503	no change	35	31	61	0	32	50
StLNC1027	0.169803	0.751451	no change	96	71	217	54	86	93
StLNC0540	0.173636	0.941968	no change	27	62	19	0	0	85
StLNC0723	0.174676	0.845184	no change	20	12	37	7	26	8
StLNC1106	0.174735	0.919457	no change	30	3	29	7	30	0
StLNC1559	0.174835	0.872818	no change	216	119	251	56	22	327
StLNC0353	0.175234	0.76981	no change	34	25	62	15	24	37
StLNC1538	0.176472	0.801923	no change	8	17	23	7	12	11
StLNC1949	0.177056	0.732431	no change	28	41	57	23	20	38
StLNC1091	0.178971	0.931387	no change	0	16	10	12	0	5
StLNC2384	0.179837	0.816056	no change	10	12	11	10	4	8
StLNC1355	0.181395	0.928246	no change	3	4	10	0	0	11
StLNC1911	0.184977	0.654284	no change	3438	3694	4453	2647	1739	3267
StLNC1139	0.187832	0.798217	no change	161	126	270	65	61	235
StLNC0751	0.189653	0.899717	no change	19	1	124	17	46	7
StLNC0593	0.190004	0.885513	no change	8	4	9	5	0	9
StLNC1512	0.190008	0.714692	no change	56	54	103	36	30	69
StLNC0331	0.193691	0.632316	no change	291	355	532	305	220	209
StLNC1733	0.195561	0.650579	no change	69	89	120	57	66	51
StLNC2804	0.19664	0.833908	no change	5	5	7	3	2	6
StLNC1065	0.197903	0.729544	no change	19	14	30	12	14	13
StLNC0061	0.198956	0.747186	no change	47	65	45	32	25	50
StLNC2141	0.201019	0.95729	no change	21	0	0	0	15	0
StLNC2852	0.201285	0.7817	no change	140	102	241	45	70	191
StLNC0379	0.202086	0.797862	no change	8	6	26	7	8	8
StLNC2289	0.202557	0.888617	no change	13	24	28	0	26	14
StLNC0496	0.203272	0.957028	no change	0	0	21	0	9	0
StLNC1799	0.203728	0.875814	no change	4	7	11	5	0	9
StLNC2562	0.206559	0.748935	no change	36	67	82	27	56	30
StLNC2123	0.207672	0.92328	no change	57	2	2	0	4	46
StLNC1890	0.209088	0.956073	no change	0	0	14	0	6	0
StLNC0205	0.210933	0.839561	no change	81	136	135	9	79	143
StLNC1093	0.21628	0.919322	no change	0	138	268	1	60	174
StLNC0903	0.216795	0.881641	no change	0	16	20	11	4	6
StLNC0749	0.217904	0.886709	no change	47	54	72	52	0	61
StLNC2034	0.218972	0.880306	no change	32	2	12	9	1	23
StLNC2094	0.21903	0.747365	no change	18	26	77	17	28	23
StLNC1694	0.219714	0.938689	no change	0	10	4	9	0	0
StLNC0130	0.220964	0.909517	no change	0	1	31	11	1	3
StLNC0317	0.221252	0.860032	no change	12	1	12	2	9	4
StLNC2291	0.22289	0.893776	no change	98	104	161	62	0	177
StLNC1145	0.225774	0.691181	no change	51	78	101	49	59	31
StLNC2480	0.22837	0.870099	no change	45	9	76	22	48	1
StLNC0765	0.231998	0.911374	no change	2	1	40	19	1	0
StLNC2535	0.232237	0.812846	no change	8	45	18	11	11	26
StLNC0851	0.235182	0.497538	no change	100	130	195	84	77	98
StLNC1619	0.236141	0.814368	no change	15	11	5	11	6	4
StLNC2052	0.237967	0.93212	no change	0	5	11	0	8	0
StLNC1975	0.239258	0.61064	no change	35	37	45	24	24	25
StLNC1823	0.241006	0.94182	no change	119	0	61	0	108	0
StLNC2643	0.24415	0.551846	no change	52	62	106	47	43	41
StLNC0017	0.247806	0.947736	no change	11	0	0	0	0	9
StLNC1014	0.250912	0.740373	no change	27	15	46	18	7	28
StLNC2841	0.252369	0.787187	no change	11	5	9	6	2	8
StLNC1761	0.253019	0.930877	no change	4	0	28	0	0	17
StLNC1301	0.257542	0.803103	no change	193	16	302	118	71	101
StLNC1719	0.266909	0.901392	no change	0	6	33	0	4	16
StLNC1129	0.267569	0.713477	no change	13	8	20	11	7	6
StLNC0081	0.26864	0.727654	no change	6	12	14	8	6	5
StLNC1308	0.271885	0.92699	no change	17	0	0	8	4	0
StLNC0648	0.271984	0.760894	no change	8	4	10	6	4	3
StLNC1738	0.272705	0.708567	no change	198	244	326	233	157	60
StLNC0119	0.278427	0.836506	no change	8	9	23	0	8	15
StLNC0557	0.27888	0.614465	no change	21	30	47	14	23	20
StLNC2079	0.279377	0.899992	no change	7	14	0	0	2	14
StLNC0799	0.281467	0.8122	no change	78	80	97	40	103	4
StLNC0326	0.286456	0.636247	no change	32	40	57	25	13	40
StLNC1112	0.287255	0.622135	no change	21	22	42	14	11	25
StLNC1981	0.290522	0.937988	no change	67	0	0	0	45	0
StLNC1004	0.291948	0.839674	no change	25	20	50	0	22	33
StLNC1836	0.305151	0.583959	no change	44	57	144	55	32	47
StLNC0424	0.305156	0.93516	no change	0	25	0	17	0	0
StLNC2285	0.307168	0.671083	no change	23	31	38	15	8	33
StLNC0691	0.307353	0.821776	no change	9	4	10	0	4	10
StLNC0295	0.309549	0.522851	no change	110	114	189	66	104	65
StLNC0696	0.310302	0.84608	no change	17	40	15	0	9	40
StLNC2821	0.310769	0.882299	no change	0	18	30	0	15	10
StLNC1627	0.31256	0.528284	no change	129	133	215	69	67	146
StLNC0253	0.315903	0.747629	no change	25	28	35	8	5	42
StLNC1843	0.323794	0.772777	no change	64	56	107	3	56	72
StLNC2063	0.324395	0.449796	no change	51	62	92	46	30	42
StLNC0784	0.326736	0.717022	no change	4	14	28	7	5	13
StLNC1700	0.328654	0.639467	no change	93	62	148	60	22	94
StLNC2027	0.331451	0.653572	no change	68	78	102	78	43	20
StLNC0709	0.333073	0.566172	no change	23	22	47	13	13	26
StLNC1522	0.336437	0.534454	no change	143	104	183	69	53	132
StLNC2621	0.336541	0.483772	no change	28	34	44	19	21	21
StLNC2019	0.34062	0.666048	no change	12	8	10	6	4	8
StLNC1516	0.341573	0.479277	no change	144	163	218	131	94	74
StLNC0953	0.341662	0.565557	no change	18	22	29	15	8	17
StLNC2681	0.343684	0.404993	no change	64	73	119	38	45	62
StLNC2559	0.346334	0.655482	no change	32	27	57	12	11	44
StLNC1187	0.346493	0.648379	no change	8	17	14	8	5	10
StLNC0923	0.348735	0.832387	no change	8	1	27	11	0	7
StLNC1867	0.349009	0.815374	no change	30	38	57	35	32	0
StLNC2534	0.354824	0.551189	no change	17	18	35	14	8	17
StLNC1978	0.361039	0.47139	no change	30	25	38	18	16	19
StLNC1525	0.361343	0.819782	no change	1	18	2	1	3	10
StLNC0935	0.361833	0.60726	no change	18	52	44	29	17	19
StLNC1279	0.362929	0.903581	no change	0	8	51	0	0	29
StLNC1523	0.364773	0.923044	no change	0	13	0	0	8	0
StLNC0832	0.365431	0.89486	no change	5	0	4	5	0	0
StLNC1637	0.366283	0.797948	no change	0	7	8	2	3	3
StLNC1670	0.36838	0.684866	no change	4	6	8	4	3	3
StLNC2221	0.368592	0.59608	no change	98	125	208	45	46	154
StLNC0090	0.368971	0.922754	no change	8	0	0	0	0	6
StLNC1375	0.371896	0.418761	no change	67	75	148	38	50	70
StLNC2200	0.373724	0.851658	no change	0	7	4	3	3	0
StLNC0345	0.373747	0.629867	no change	12	21	12	10	6	11
StLNC2516	0.374684	0.848778	no change	4	0	6	2	3	0
StLNC1342	0.377882	0.896658	no change	0	0	23	0	2	8
StLNC0206	0.379172	0.869494	no change	34	0	125	38	0	39
StLNC2595	0.37923	0.810874	no change	54	14	53	41	24	0
StLNC2811	0.380251	0.801615	no change	8	2	9	0	2	9
StLNC2830	0.384674	0.897776	no change	31	0	22	0	0	33
StLNC0314	0.388167	0.672013	no change	17	13	24	2	13	15
StLNC1718	0.388664	0.369095	no change	65	92	140	50	42	71
StLNC0207	0.391508	0.601006	no change	51	82	69	67	23	25
StLNC2417	0.391662	0.779791	no change	2	7	7	0	3	6
StLNC1286	0.394491	0.795641	no change	19	19	55	9	0	42
StLNC1481	0.394536	0.890125	no change	0	0	15	0	4	2
StLNC0808	0.395692	0.916738	no change	0	0	18	0	0	8
StLNC0852	0.398058	0.455644	no change	106	98	305	77	67	118
StLNC0513	0.400623	0.582848	no change	39	54	106	24	17	67
StLNC0224	0.400985	0.77223	no change	5	6	15	0	3	11
StLNC2582	0.401936	0.84318	no change	6	2	7	8	0	0
StLNC2620	0.406465	0.395452	no change	42	32	59	22	20	31
StLNC2033	0.40895	0.89429	no change	0	0	70	23	0	5
StLNC0694	0.411851	0.651771	no change	4	14	31	6	11	7
StLNC1122	0.412246	0.501676	no change	35	23	54	15	14	32
StLNC1334	0.415283	0.889768	no change	8	22	0	0	18	0
StLNC1383	0.415812	0.754418	no change	5	4	6	5	3	0
StLNC2018	0.420163	0.830358	no change	0	7	7	4	3	0
StLNC1270	0.420362	0.587829	no change	14	7	22	6	5	12
StLNC2756	0.421131	0.707912	no change	6	6	5	1	2	7
StLNC2477	0.421174	0.722777	no change	4	2	23	5	6	2
StLNC1786	0.423965	0.648267	no change	9	10	7	2	6	7
StLNC2043	0.42637	0.75593	no change	11	15	17	6	0	19
StLNC1396	0.426473	0.882784	no change	14	0	5	11	0	0
StLNC0865	0.428619	0.881423	no change	8	7	0	0	9	0
StLNC2299	0.430553	0.908848	no change	0	0	31	12	0	0
StLNC1891	0.431514	0.601492	no change	15	12	11	4	6	12
StLNC1910	0.436136	0.800806	no change	92	121	43	0	33	130
StLNC0401	0.437252	0.337206	no change	63	68	138	35	43	62
StLNC2010	0.437307	0.259863	no change	425	599	798	366	312	286
StLNC2611	0.44113	0.316853	no change	38	39	62	26	20	28
StLNC1231	0.441441	0.642732	no change	25	16	27	22	11	3
StLNC2392	0.443874	0.855072	no change	504	0	1422	740	118	1
StLNC2738	0.446714	0.556313	no change	160	116	69	68	41	99
StLNC2826	0.446906	0.6733	no change	3	5	12	1	4	5
StLNC1043	0.447028	0.534256	no change	103	64	139	68	66	23
StLNC1092	0.448111	0.875641	no change	0	0	25	0	4	6
StLNC2716	0.450765	0.876163	no change	0	0	27	4	6	0
StLNC0982	0.451311	0.358159	no change	45	47	97	28	24	46
StLNC0001	0.455313	0.782187	no change	29	10	8	0	4	26
StLNC0522	0.463518	0.576483	no change	7	29	26	8	9	16
StLNC1576	0.463622	0.759856	no change	48	52	60	0	31	58
StLNC0611	0.465766	0.617844	no change	7	3	12	4	4	3
StLNC0559	0.46672	0.880393	no change	0	0	36	0	12	1
StLNC2844	0.469208	0.85732	no change	135	0	58	0	4	115
StLNC2538	0.474098	0.460797	no change	25	34	37	16	23	11
StLNC1812	0.475088	0.404595	no change	21	36	64	17	23	20
StLNC2434	0.47552	0.736824	no change	21	24	37	29	0	14
StLNC2334	0.476543	0.878914	no change	0	63	0	22	0	18
StLNC0847	0.476849	0.519966	no change	36	54	28	17	16	35
StLNC0162	0.478939	0.699742	no change	6	7	14	6	0	8
StLNC1932	0.483728	0.864123	no change	10	0	6	0	8	0
StLNC2607	0.489247	0.728335	no change	27	26	41	18	0	33
StLNC1557	0.49512	0.581403	no change	8	4	22	7	4	5
StLNC0313	0.496591	0.863671	no change	4	11	0	9	0	0
StLNC1784	0.496946	0.61688	no change	8	6	4	3	3	4
StLNC1703	0.498474	0.500082	no change	20	20	25	8	6	21
StLNC0633	0.500148	0.750205	no change	51	9	41	0	27	26
StLNC0175	0.504608	0.71237	no change	8	6	10	9	3	0
StLNC1681	0.507926	0.229884	no change	74	61	136	44	36	55
StLNC0266	0.510802	0.36223	no change	21	33	42	18	11	20
StLNC1560	0.522395	0.412411	no change	25	25	23	10	11	18
StLNC1228	0.522678	0.859637	no change	17	16	0	0	0	22
StLNC0991	0.52371	0.166315	no change	134	135	192	81	59	96
StLNC0337	0.523827	0.427091	no change	21	16	28	6	12	15
StLNC0179	0.524514	0.28146	no change	44	52	107	34	23	42
StLNC2514	0.52682	0.589443	no change	6	6	5	2	3	4
StLNC2426	0.528834	0.294435	no change	34	56	68	31	23	25
StLNC0129	0.530192	0.263793	no change	253	285	529	134	129	267
StLNC0327	0.534963	0.479144	no change	65	30	120	23	20	62
StLNC1521	0.53634	0.690841	no change	4	7	4	0	4	4
StLNC1712	0.536462	0.657544	no change	63	38	145	23	3	96
StLNC1824	0.537987	0.76576	no change	27	0	12	1	4	17
StLNC0500	0.538856	0.594953	no change	89	73	166	95	50	8
StLNC0905	0.544437	0.311376	no change	28	22	51	18	12	19
StLNC1731	0.544592	0.711028	no change	23	29	23	27	11	0
StLNC2466	0.545607	0.686642	no change	14	6	22	0	11	9
StLNC0351	0.548438	0.475081	no change	136	201	296	47	61	213
StLNC1010	0.551989	0.327421	no change	594	446	790	201	218	512
StLNC2649	0.555778	0.748671	no change	145	0	128	36	20	83
StLNC0609	0.561919	0.606025	no change	5	3	23	3	7	3
StLNC0484	0.562746	0.69795	no change	2	86	127	13	68	11
StLNC0388	0.562769	0.57371	no change	26	24	12	20	9	4
StLNC0101	0.562882	0.413979	no change	39	15	53	16	12	24
StLNC0542	0.566826	0.210718	no change	2890	4224	5941	1772	1546	3108
StLNC2809	0.571335	0.851642	no change	17	33	0	0	27	0
StLNC2257	0.57443	0.23568	no change	135	158	183	77	95	61
StLNC0044	0.575133	0.793638	no change	37	0	54	0	18	24
StLNC1243	0.576268	0.103729	no change	174	148	307	93	87	120
StLNC1482	0.5775	0.444673	no change	15	8	32	11	7	7
StLNC1330	0.578933	0.53129	no change	6	12	12	2	4	9
StLNC2072	0.581737	0.394287	no change	304	330	671	121	116	394
StLNC1385	0.586086	0.51516	no change	7	13	39	7	13	5
StLNC2411	0.587383	0.575869	no change	10	11	7	5	1	9
StLNC2576	0.590975	0.427559	no change	55	61	104	28	13	67
StLNC2393	0.595719	0.800527	no change	32	0	176	38	0	46
StLNC2676	0.597871	0.556047	no change	4	15	27	8	2	11
StLNC2102	0.602187	0.699572	no change	31	61	63	16	0	64
StLNC2036	0.60326	0.561198	no change	9	6	4	3	2	5
StLNC0283	0.603323	0.790031	no change	36	29	0	0	11	28
StLNC1282	0.605851	0.452413	no change	23	24	45	4	18	21
StLNC2131	0.608884	0.823568	no change	5	0	10	0	0	7
StLNC1196	0.609809	0.132181	no change	274	198	359	106	137	153
StLNC2427	0.613884	0.693715	no change	3	1	11	3	3	0
StLNC1793	0.614205	0.78455	no change	19	4	3	14	0	0
StLNC0189	0.618209	0.826051	no change	5	4	0	5	0	0
StLNC1128	0.62478	0.388098	no change	48	55	64	34	33	11
StLNC2332	0.628008	0.753724	no change	6	3	3	6	0	0
StLNC0003	0.629428	0.0489846	no change	451	613	837	304	264	319
StLNC2201	0.63116	0.544205	no change	22	5	63	21	7	9
StLNC2297	0.63391	0.373263	no change	4153	9435	4398	2373	2387	4503
StLNC2087	0.635256	0.835367	no change	0	11	74	0	29	0
StLNC1601	0.642042	0.83828	no change	0	23	1	0	12	0
StLNC0193	0.642072	0.61707	no change	7	7	16	4	0	10
StLNC1467	0.642597	0.431172	no change	11	9	12	7	5	3
StLNC0490	0.646113	0.674962	no change	34	39	69	60	1	2
StLNC0686	0.646988	0.436785	no change	22	45	38	23	5	23
StLNC0845	0.650656	0.831191	no change	10	38	0	0	0	29
StLNC2002	0.653436	0.476222	no change	16	6	27	9	9	3
StLNC1249	0.660182	0.695851	no change	11	28	4	18	4	0
StLNC0661	0.668435	0.807897	no change	0	7	10	7	0	0
StLNC2604	0.672839	0.614143	no change	11	5	6	6	0	5
StLNC2154	0.678105	0.409813	no change	11	23	24	4	7	16
StLNC0066	0.680729	0.81697	no change	0	22	33	0	21	0
StLNC1285	0.684534	0.242081	no change	26	28	46	19	15	10
StLNC0010	0.688083	0.60774	no change	12	5	16	8	6	0
StLNC0146	0.693917	0.614724	no change	2	8	8	0	4	4
StLNC2065	0.69689	0.431525	no change	6	10	8	4	4	3
StLNC0011	0.697354	0.399398	no change	79	411	403	89	178	120
StLNC2003	0.697856	0.654345	no change	0	12	12	2	6	2
StLNC2442	0.699363	0.335446	no change	12	16	28	12	7	5
StLNC1226	0.69951	0.714007	no change	17	1	45	22	2	0
StLNC2784	0.699632	0.189948	no change	111	102	136	55	30	77
StLNC1977	0.701748	0.738068	no change	13	10	0	4	0	9
StLNC1894	0.705351	0.441532	no change	15	97	202	43	33	50
StLNC1230	0.708783	0.634821	no change	2	6	3	3	2	0
StLNC1204	0.709796	0.262649	no change	29	16	51	10	14	17
StLNC2078	0.710802	0.304495	no change	40	58	64	14	16	45
StLNC1127	0.712655	0.0866832	no change	81	75	144	34	46	50
StLNC0549	0.72318	0.818962	no change	24	0	0	1	11	0
StLNC0778	0.723486	0.710536	no change	5	5	12	9	0	0
StLNC2096	0.726443	0.340986	no change	10	9	15	5	3	7
StLNC0492	0.729613	0.611567	no change	12	7	44	0	14	10
StLNC0630	0.731533	0.271797	no change	17	19	22	11	5	10
StLNC1144	0.732859	0.664243	no change	130	203	254	140	104	0
StLNC1317	0.733328	0.0891965	no change	67	84	149	50	34	43
StLNC2061	0.74763	0.789652	no change	0	6	22	0	0	11
StLNC0124	0.753909	0.186626	no change	130	106	247	39	59	106
StLNC0148	0.759808	0.264181	no change	117	124	209	31	45	120
StLNC1959	0.761806	0.387193	no change	17	8	65	11	8	15
StLNC1443	0.761827	0.576975	no change	6	10	5	0	3	7
StLNC2413	0.762035	0.108038	no change	51	60	66	25	21	32
StLNC2158	0.762653	0.554277	no change	12	13	24	0	7	14
StLNC2790	0.763368	0.139534	no change	30	36	62	15	14	25
StLNC2653	0.764708	0.453895	no change	8	4	9	1	4	4
StLNC1640	0.768513	0.158833	no change	62	53	118	40	18	39
StLNC0836	0.769491	0.117549	no change	72	63	120	25	44	37
StLNC2690	0.775249	0.058278	no change	77	62	125	39	32	39
StLNC1410	0.786429	0.3476	no change	14	9	19	4	3	11
StLNC0023	0.786977	0.834303	no change	21	0	0	0	10	0
StLNC0038	0.787797	0.711091	no change	16	7	39	0	0	26
StLNC0067	0.787955	0.433457	no change	9	6	5	4	2	3
StLNC1224	0.788674	0.689902	no change	4	0	10	3	2	0
StLNC1472	0.789724	0.397569	no change	22	16	25	3	5	20
StLNC1096	0.792777	0.689927	no change	0	9	5	0	3	3
StLNC0438	0.806091	0.779112	no change	13	0	28	0	14	0
StLNC1848	0.809024	0.237741	no change	39	16	34	13	10	15
StLNC0296	0.817973	0.112221	no change	64	68	149	24	39	48
StLNC2701	0.819893	0.435301	no change	27	22	48	8	2	31
StLNC0276	0.822086	0.0121796	no change	25124	24931	53783	12162	12927	15901
StLNC2025	0.822988	0.777111	no change	0	25	14	16	0	0
StLNC1740	0.824246	0.715058	no change	41	17	77	0	0	57
StLNC0970	0.826378	0.668557	no change	4	2	7	5	0	0
StLNC2076	0.82663	0.217092	no change	11	16	26	8	7	6
StLNC2511	0.832866	0.826437	no change	0	0	18	0	5	0
StLNC0687	0.833263	0.559408	no change	18	32	27	0	8	26
StLNC2400	0.833465	0.652895	no change	1	7	1	3	1	0
StLNC1253	0.833558	0.416806	no change	68	8	69	11	14	35
StLNC0972	0.836586	0.49616	no change	1	29	22	9	5	7
StLNC2293	0.838903	0.822949	no change	33	0	0	0	0	18
StLNC0229	0.839812	0.123626	no change	26	30	39	10	12	17
StLNC0930	0.840811	0.0785493	no change	258	208	485	89	107	181
StLNC2569	0.843284	0.543663	no change	6	12	158	16	33	4
StLNC2639	0.846969	0.224488	no change	68	60	91	16	19	57
StLNC1345	0.852751	0.0964394	no change	27	30	62	14	15	17
StLNC0390	0.856589	0.820999	no change	0	0	22	0	6	0
StLNC1503	0.858173	0.762228	no change	8	9	0	8	0	0
StLNC0868	0.860521	0.0844329	no change	72	75	158	26	45	46
StLNC0018	0.885351	0.402674	no change	7	66	119	14	34	19
StLNC1989	0.891876	0.766017	no change	0	1	27	0	0	9
StLNC1618	0.896054	0.199566	no change	17	22	32	6	6	16
StLNC0531	0.896896	0.642593	no change	0	5	9	0	2	3
StLNC1399	0.896931	0.0854279	no change	162	170	304	51	68	128
StLNC2533	0.909654	0.49864	no change	10	9	6	4	6	0
StLNC1076	0.910468	0.476401	no change	6	6	5	0	3	4
StLNC1641	0.919301	0.510439	no change	25	36	62	0	21	25
StLNC1614	0.921031	0.740516	no change	6	6	0	0	0	6
StLNC1732	0.922146	0.438688	no change	15	14	221	18	14	46
StLNC1777	0.927199	0.640977	no change	10	12	15	14	0	0
StLNC2710	0.931852	0.516067	no change	4	8	3	3	3	0
StLNC1066	0.932728	0.804592	no change	0	0	31	0	8	0
StLNC0306	0.932796	0.470544	no change	6	6	11	2	0	7
StLNC1194	0.934579	0.652503	no change	8	9	2	0	0	9
StLNC0414	0.935568	0.529396	no change	3	41	2	11	5	4
StLNC0249	0.940586	0.739569	no change	0	12	4	0	6	0
StLNC0772	0.943667	0.641042	no change	17	0	14	7	0	5
StLNC0481	0.944037	0.00349344	no change	478	558	914	266	223	230
StLNC1964	0.950902	0.218878	no change	18	18	34	3	9	14
StLNC1579	0.951356	0.602121	no change	87	132	588	38	0	243
StLNC0238	0.956063	0.551558	no change	5	1	5	3	1	0
StLNC0254	0.95633	0.135841	no change	422	366	384	211	154	86
StLNC0521	0.956345	0.053955	no change	158	105	193	58	38	78
StLNC0597	0.961389	0.676612	no change	17	10	0	11	0	1
StLNC2556	0.968234	0.726532	no change	0	11	10	0	7	0
StLNC0422	0.972007	0.616411	no change	5	3	13	7	0	0
StLNC0211	0.973937	0.433576	no change	16	10	25	9	0	10
StLNC2662	0.974109	0.356736	no change	5	15	58	8	12	4
StLNC1591	0.981699	0.210745	no change	10	12	22	4	3	9
StLNC2691	0.985238	0.0723381	no change	38	49	80	17	26	16
StLNC1859	0.985948	0.493576	no change	10	12	31	15	0	3
StLNC0371	0.990219	0.491556	no change	15	35	16	15	10	0
StLNC2084	0.992996	0.720967	no change	3	0	15	0	5	0
StLNC2047	1.00573	0.423309	no change	286	533	1126	186	10	496
StLNC0971	1.00843	0.113206	no change	41	67	50	13	21	26
StLNC0599	1.00908	0.673003	no change	52	0	209	50	25	0
StLNC2048	1.00956	0.469116	no change	32	19	48	10	0	27
StLNC2597	1.00989	0.323334	no change	19	38	14	18	4	6
StLNC1821	1.01217	0.1121	no change	22	20	39	8	6	15
StLNC1175	1.03334	0.715507	no change	0	11	3	0	5	0
StLNC1490	1.03693	0.304389	no change	13	17	5	5	3	6
StLNC2608	1.04643	0.0434455	up	31	32	53	13	15	12
StLNC0304	1.04833	0.611238	no change	18	20	21	21	0	0
StLNC0278	1.04871	0.235311	no change	22	86	97	10	19	43
StLNC0580	1.04974	0.388552	no change	9	7	13	0	6	4
StLNC1710	1.0583	0.552646	no change	7	3	78	4	0	22
StLNC2839	1.06104	0.125943	no change	22	35	26	13	9	8
StLNC1556	1.06299	0.148829	no change	12	22	20	8	6	5
StLNC1210	1.06368	0.44286	no change	18	11	15	3	0	14
StLNC1251	1.08097	0.459587	no change	61	37	76	0	35	24
StLNC1654	1.08161	0.500047	no change	1	6	4	1	0	3
StLNC0391	1.0826	0.396213	no change	6	4	7	0	2	4
StLNC1068	1.09059	0.306023	no change	16	3	17	2	6	4
StLNC1998	1.09104	0.110269	no change	121	178	169	82	51	28
StLNC2159	1.09531	0.0551527	no change	26	33	55	16	8	14
StLNC1563	1.10298	0.35348	no change	2	4	10	1	2	2
StLNC0190	1.1112	0.356907	no change	63	13	201	57	14	8
StLNC1419	1.12191	0.764959	no change	0	0	56	0	0	15
StLNC0810	1.1258	0.0942583	no change	95	300	289	54	67	109
StLNC1533	1.12607	0.259204	no change	19	12	21	9	7	1
StLNC1277	1.13082	0.126562	no change	313	326	701	47	190	188
StLNC2527	1.13214	0.0951084	no change	18	15	35	5	6	11
StLNC0528	1.13289	0.703974	no change	1	10	0	0	4	0
StLNC2706	1.13949	0.380972	no change	25	21	38	0	11	17
StLNC2629	1.14175	0.409539	no change	51	885	77	53	83	263
StLNC1473	1.14375	0.35422	no change	6	1	13	2	2	2
StLNC2118	1.14412	0.553168	no change	0	5	8	2	0	2
StLNC1040	1.14535	0.415541	no change	23	7	18	0	4	13
StLNC0621	1.14829	0.536321	no change	6	6	10	7	0	0
StLNC0506	1.14917	0.405203	no change	32	16	36	0	18	9
StLNC2327	1.15468	0.360502	no change	14	13	9	7	0	6
StLNC1044	1.15549	0.366706	no change	26	14	31	11	0	13
StLNC2727	1.159	0.0362631	up	74	55	129	28	33	19
StLNC0629	1.16332	0.288113	no change	13	6	17	2	1	9
StLNC2476	1.16466	0.376483	no change	247	4	371	68	56	63
StLNC0612	1.16662	0.542028	no change	12	9	12	0	0	12
StLNC1002	1.18666	0.112211	no change	11	16	29	4	8	5
StLNC0728	1.18703	0.568759	no change	15	30	36	0	0	28
StLNC1594	1.18951	0.357273	no change	3	5	8	0	2	3
StLNC2016	1.19035	0.534133	no change	29	1	5	2	10	0
StLNC1743	1.19087	0.669406	no change	0	106	510	153	2	0
StLNC2750	1.204	0.427168	no change	8	42	66	10	0	26
StLNC1180	1.20501	0.38831	no change	6	8	10	0	1	7
StLNC1008	1.2136	0.172538	no change	14	8	19	3	2	8
StLNC2070	1.21895	0.0621667	no change	17	18	26	8	5	6
StLNC1050	1.22596	0.317082	no change	17	11	20	0	8	7
StLNC1172	1.22693	0.225086	no change	12	6	11	4	4	1
StLNC1780	1.2325	0.075857	no change	17	17	23	5	4	9
StLNC1430	1.23369	0.66734	no change	16	16	0	0	0	13
StLNC0530	1.24204	0.247828	no change	8	30	58	11	13	2
StLNC0741	1.24738	0.422467	no change	11	4	53	0	12	5
StLNC0840	1.2612	0.369518	no change	51	34	72	30	0	18
StLNC1628	1.26201	0.306183	no change	7	15	16	4	0	8
StLNC2725	1.26261	0.166133	no change	8	9	39	3	6	6
StLNC2536	1.27268	0.233547	no change	324	1966	316	213	242	448
StLNC0605	1.27676	0.290286	no change	12	12	14	0	4	8
StLNC2493	1.27841	0.664065	no change	22	0	57	0	19	0
StLNC0428	1.2785	0.0208616	up	32	42	59	12	9	19
StLNC0568	1.28236	0.127761	no change	10	9	24	3	6	3
StLNC1937	1.28468	0.219967	no change	3	7	11	2	2	2
StLNC2198	1.29057	0.567855	no change	0	17	3	0	1	6
StLNC1511	1.30103	0.518703	no change	0	4	11	1	0	3
StLNC2307	1.30261	0.204722	no change	2910	16459	3108	1806	2012	3763
StLNC1615	1.31893	0.333435	no change	14	13	28	12	3	0
StLNC1902	1.33492	0.00739051	up	234	286	417	124	74	67
StLNC1006	1.36418	0.457929	no change	6	3	12	0	0	6
StLNC2370	1.36643	0.314491	no change	5	11	39	6	0	8
StLNC0151	1.36808	0.178263	no change	528	2776	536	285	336	616
StLNC1275	1.37096	0.492105	no change	450	1791	207	265	0	573
StLNC2026	1.38059	0.000329664	up	159	180	307	52	48	78
StLNC1273	1.38226	0.0713394	no change	33	31	66	7	20	7
StLNC0177	1.3871	0.00931454	up	204	98	283	53	43	64
StLNC2489	1.39081	0.175102	no change	374	2432	506	254	294	492
StLNC1714	1.39161	0.250252	no change	21	17	33	16	2	1
StLNC2441	1.39797	0.0549925	no change	160	214	159	41	25	95
StLNC0788	1.40111	0.598297	no change	2	174	168	0	84	0
StLNC0084	1.40719	0.135046	no change	106	142	227	29	9	96
StLNC0948	1.41144	0.634602	no change	45	0	33	0	20	0
StLNC1485	1.41168	0.114247	no change	18	18	24	7	1	9
StLNC1892	1.41413	0.539527	no change	0	94	61	14	26	0
StLNC2834	1.41775	0.0782416	no change	252	192	370	105	85	22
StLNC1315	1.41952	0.70928	no change	13	0	0	0	4	0
StLNC0370	1.42327	0.22714	no change	5	7	10	3	0	3
StLNC0909	1.42753	0.0348899	up	21	19	41	10	6	5
StLNC2044	1.4449	0.0755548	no change	103	84	66	34	27	10
StLNC0814	1.46469	0.31728	no change	18	36	10	5	0	15
StLNC2787	1.46533	0.697869	no change	0	23	0	7	0	0
StLNC2568	1.46856	0.410197	no change	5	5	10	5	0	0
StLNC2757	1.47164	0.274587	no change	36	45	67	0	16	23
StLNC0111	1.47767	0.148635	no change	12	14	18	1	2	9
StLNC0082	1.49618	0.384334	no change	105	0	102	31	9	12
StLNC0472	1.5126	0.579158	no change	0	14	7	0	0	6
StLNC0837	1.51911	0.268112	no change	48	32	54	19	14	0
StLNC0929	1.53511	0.274914	no change	10	4	4	3	0	2
StLNC1774	1.53696	0.212353	no change	6	57	63	22	3	5
StLNC2248	1.54172	0.610912	no change	20	0	112	26	0	0
StLNC0859	1.54245	0.189358	no change	61	65	95	3	5	51
StLNC0387	1.57142	0.185788	no change	8	7	13	2	0	5
StLNC2698	1.58334	0.56321	no change	14	0	13	0	6	0
StLNC1914	1.58529	0.332732	no change	11	1	12	1	0	5
StLNC2590	1.58796	0.231858	no change	15	14	22	0	2	11
StLNC0463	1.59616	0.44706	no change	1	2	16	0	0	4
StLNC2071	1.61375	0.275641	no change	193	988	20	104	28	220
StLNC1575	1.61673	0.131493	no change	31	16	79	13	1	14
StLNC2395	1.63176	0.394633	no change	2	9	4	0	0	4
StLNC2753	1.65409	0.195925	no change	265	260	347	9	12	200
StLNC1905	1.66356	0.36534	no change	3	1	57	0	4	7
StLNC0150	1.66677	0.335041	no change	6	4	6	0	0	4
StLNC2589	1.67731	0.569016	no change	47	0	32	0	17	0
StLNC0957	1.6812	0.00124593	up	180	187	254	63	45	32
StLNC0231	1.68466	0.112938	no change	5	6	18	1	3	2
StLNC0689	1.68589	0.213318	no change	7	4	12	4	0	1
StLNC1131	1.69256	0.141783	no change	10	6	15	3	0	4
StLNC1660	1.693	0.361349	no change	8	11	21	0	8	0
StLNC0250	1.70166	0.353343	no change	10	3	7	0	0	5
StLNC2252	1.72119	0.143676	no change	34	178	19	19	10	31
StLNC0499	1.72781	0.185188	no change	2	7	36	3	4	1
StLNC0202	1.73124	0.0181927	up	67	80	86	24	20	7
StLNC0272	1.73503	0.238039	no change	5	31	9	6	0	5
StLNC0572	1.7358	0.360384	no change	1	10	1	2	0	1
StLNC0924	1.7382	0.0227869	up	99	33	182	26	22	15
StLNC1451	1.76416	0.314058	no change	12	1	3	1	0	3
StLNC2305	1.77037	0.379194	no change	23	0	1	3	2	1
StLNC2776	1.77332	0.326688	no change	5	7	0	1	1	1
StLNC0802	1.77676	0.326967	no change	11	13	20	0	0	10
StLNC1339	1.78152	0.0130059	up	32	55	78	7	7	21
StLNC2836	1.7904	0.513089	no change	11	0	28	7	0	0
StLNC1971	1.79082	0.142032	no change	111	27	25	25	10	3
StLNC1367	1.81004	0.155101	no change	27	19	55	10	9	0
StLNC0034	1.83217	0.290533	no change	8	6	11	5	0	0
StLNC0753	1.8401	0.504276	no change	0	3	26	0	0	5
StLNC1348	1.85101	0.410873	no change	0	62	47	17	4	0
StLNC0137	1.87678	0.339835	no change	0	1	45	2	1	4
StLNC0444	1.88159	0.511679	no change	22	5	0	0	6	0
StLNC1469	1.89412	0.529034	no change	35	0	120	25	0	0
StLNC2365	1.90159	0.534905	no change	52	73	0	0	0	32
StLNC0512	1.90548	0.0221403	up	64	92	70	9	7	32
StLNC0906	1.90559	0.240288	no change	2	16	30	1	0	8
StLNC1376	1.91538	0.495886	no change	333	1724	0	0	297	164
StLNC2143	1.91579	0.224827	no change	15	32	4	0	8	3
StLNC1514	1.9261	0.00942855	up	30	25	30	3	5	9
StLNC0718	1.9294	0.347786	no change	37	37	16	0	0	21
StLNC2731	1.94872	0.271248	no change	23	2	2	0	3	3
StLNC2270	1.97058	0.604641	no change	18	0	0	4	0	0
StLNC0663	2.00737	0.0068649	up	24	14	36	4	5	4
StLNC2457	2.00881	0.00158342	up	29	35	45	5	5	10
StLNC0617	2.04447	0.322796	no change	32	22	87	0	21	0
StLNC2385	2.05414	0.338354	no change	18	0	26	6	1	0
StLNC1881	2.05553	0.0496752	up	233	42	91	8	32	30
StLNC0103	2.06167	0.0873028	no change	7	6	10	0	2	2
StLNC2310	2.07595	0.104707	no change	6	7	11	0	3	1
StLNC2496	2.07697	0.232034	no change	6	10	16	0	5	0
StLNC2331	2.08518	0.0204477	up	22	19	19	4	1	6
StLNC2363	2.09363	0.461279	no change	19	26	0	9	0	0
StLNC0342	2.09436	0.213273	no change	7	7	11	0	4	0
StLNC1202	2.11176	0.0242274	up	16	13	48	6	1	5
StLNC1223	2.11353	0.00343954	up	58	134	101	16	9	27
StLNC2745	2.12609	0.226535	no change	13	6	7	0	0	5
StLNC1023	2.132	0.222796	no change	15	13	15	0	0	8
StLNC1596	2.13561	0.484317	no change	0	43	2	0	8	0
StLNC2249	2.16286	0.0332069	up	26	41	11	5	6	3
StLNC0869	2.19372	0.418058	no change	619	0	210	9	0	149
StLNC2209	2.19403	0.185316	no change	8	107	155	24	14	0
StLNC2658	2.20405	0.450322	no change	10	0	1	2	0	0
StLNC1480	2.21084	0.043563	up	22	17	21	5	0	5
StLNC1215	2.23175	0.000234988	up	109	122	105	22	19	13
StLNC1605	2.23674	0.289383	no change	2	2	31	0	4	0
StLNC1705	2.23858	0.231102	no change	286	1	449	74	26	1
StLNC2561	2.28432	0.222464	no change	14	20	47	11	0	0
StLNC0792	2.28453	0.141619	no change	4	2	8	1	0	1
StLNC0632	2.29056	0.299992	no change	312	0	375	85	9	1
StLNC2135	2.32383	0.402163	no change	0	16	3	3	0	0
StLNC0031	2.32478	0.0741796	no change	5	6	10	2	0	1
StLNC2146	2.33359	0.411856	no change	0	37	8	7	0	0
StLNC0073	2.34327	0.0628403	no change	10	6	11	0	1	3
StLNC1370	2.3606	0.266032	no change	11	6	0	1	0	2
StLNC2670	2.38508	0.0708953	no change	29	7	7	1	1	5
StLNC0418	2.40239	0.239548	no change	52	43	107	0	0	29
StLNC2820	2.41367	0.425291	no change	19	0	0	1	2	0
StLNC0294	2.41881	0.349591	no change	0	7	10	0	2	0
StLNC0917	2.45037	0.000366794	up	288	114	490	49	35	27
StLNC0707	2.45455	0.0257154	up	18	32	38	5	0	7
StLNC0575	2.45974	0.0280002	up	19	34	43	5	0	8
StLNC2751	2.47053	0.103626	no change	18	2	32	2	4	0
StLNC2854	2.47529	0.000300482	up	29	31	56	4	3	8
StLNC1834	2.47966	0.178897	no change	25	26	29	0	10	0
StLNC2359	2.50019	0.139366	no change	9	8	26	5	0	0
StLNC0002	2.5037	0.243003	no change	10	1	2	0	0	2
StLNC0416	2.50653	0.00571319	up	70	84	75	18	2	11
StLNC1314	2.51272	0.149617	no change	9	14	31	0	6	0
StLNC1359	2.52791	0.376363	no change	47	0	70	0	0	15
StLNC1179	2.52958	0.355347	no change	21	0	5	0	0	4
StLNC0958	2.53278	0.215628	no change	23	6	85	12	0	0
StLNC1080	2.53326	0.000576777	up	464	343	1582	67	54	154
StLNC1458	2.54572	0.101998	no change	7	6	10	0	0	3
StLNC1603	2.54595	0.10689	no change	7	11	12	0	0	4
StLNC0071	2.567	3.77e-05	up	55	47	57	7	7	6
StLNC1186	2.61722	0.0975956	no change	8	6	12	3	0	0
StLNC2193	2.68309	0.0835216	no change	6	9	10	0	0	3
StLNC1487	2.70979	0.112924	no change	6	18	11	4	0	0
StLNC2229	2.72677	0.151494	no change	1	13	2	1	0	1
StLNC2358	2.73084	3.06e-05	up	33	31	69	5	4	5
StLNC1047	2.75979	0.141916	no change	4	28	13	5	0	0
StLNC0037	2.76709	0.346849	no change	52	6	0	0	7	0
StLNC2237	2.79123	0.174216	no change	4	46	12	7	0	0
StLNC0145	2.79549	0.34898	no change	0	110	25	0	0	17
StLNC1800	2.80017	0.000320898	up	24	19	46	3	2	4
StLNC0181	2.80157	0.0923147	no change	17	19	21	6	0	0
StLNC0692	2.80791	0.167716	no change	1	158	372	34	12	0
StLNC1680	2.84102	0.216523	no change	0	90	213	0	6	22
StLNC1163	2.85166	0.0918273	no change	62	1	11	1	1	7
StLNC2678	2.85496	0.0344406	up	22	5	39	4	2	0
StLNC1030	2.85945	0.0010192	up	171	51	175	21	12	6
StLNC0511	2.86325	0.300561	no change	3	15	0	0	2	0
StLNC1141	2.87874	0.279208	no change	8	10	0	0	2	0
StLNC1706	2.89169	0.0138443	up	37	39	77	0	4	11
StLNC2226	2.9456	0.000246617	up	93	50	166	3	11	14
StLNC1255	2.9586	0.0125199	up	27	17	54	0	2	7
StLNC1233	2.96412	0.0116398	up	182	16	196	21	10	4
StLNC1609	2.97338	0.031465	up	21	10	8	3	0	1
StLNC0128	2.98099	0.00315218	up	28	16	18	3	2	1
StLNC0473	2.9864	0.00570487	up	134	40	202	21	9	2
StLNC1380	2.99236	0.255903	no change	0	8	35	0	3	0
StLNC1219	2.9983	3.48e-05	up	66	39	112	3	8	8
StLNC1667	3.02912	0.251862	no change	0	27	19	4	0	0
StLNC1612	3.03649	0.00269865	up	172	96	320	2	21	27
StLNC0566	3.06918	0.266516	no change	0	19	3	0	2	0
StLNC2782	3.06936	0.0324999	up	26	1	35	2	2	1
StLNC1925	3.0861	0.0394983	up	24	25	149	12	2	0
StLNC1049	3.08625	0.420868	no change	0	0	44	0	0	3
StLNC0936	3.11094	0.0128827	up	40	26	75	2	0	10
StLNC1465	3.11858	0.415995	no change	0	0	45	0	0	3
StLNC0904	3.13256	0.122969	no change	12	0	44	2	0	2
StLNC1999	3.19193	0.159358	no change	0	61	14	1	0	6
StLNC1082	3.19633	0.155739	no change	39	0	180	0	3	12
StLNC1213	3.21778	0.0202912	up	32	7	6	2	1	1
StLNC2402	3.22884	0.12168	no change	95	168	117	0	0	34
StLNC2503	3.23656	0.0184124	up	45	21	41	1	7	0
StLNC1518	3.24253	0.254352	no change	13	0	125	0	0	9
StLNC1137	3.24564	0.215649	no change	0	19	42	4	0	0
StLNC1900	3.287	0.00263848	up	64	38	65	7	0	6
StLNC1168	3.29034	0.0264366	up	269	98	290	15	31	0
StLNC2116	3.30403	0.10355	no change	125	31	63	17	0	0
StLNC1567	3.32377	0.250319	no change	0	12	1	1	0	0
StLNC1170	3.33482	2.17e-06	up	200	137	259	16	5	23
StLNC1395	3.37703	0.0621902	no change	2	4	11	1	0	0
StLNC2100	3.39999	0.102403	no change	1	23	1	0	1	1
StLNC1647	3.4065	0.0205202	up	4	7	21	1	0	1
StLNC1860	3.42444	0.00755541	up	176	12	509	4	17	20
StLNC2091	3.4326	0.000617074	up	713	180	910	74	29	12
StLNC0285	3.45827	0.0380085	up	14	4	12	2	0	0
StLNC0338	3.47678	0.375551	no change	0	14	0	0	0	1
StLNC0421	3.49163	0.0260443	up	14	27	19	4	0	0
StLNC2563	3.50531	0.157533	no change	155	1	197	21	0	0
StLNC1779	3.51025	0.0357853	up	15	39	21	5	0	0
StLNC2329	3.57019	0.194249	no change	0	24	3	0	0	2
StLNC1539	3.57654	0.361868	no change	0	15	0	0	0	1
StLNC2054	3.57734	0.052062	no change	57	1	68	0	6	1
StLNC1268	3.61379	0.0731345	no change	105	15	129	14	0	0
StLNC2703	3.65038	0.0668139	no change	1	4	17	1	0	0
StLNC0382	3.66993	0.205972	no change	0	102	146	0	12	0
StLNC0413	3.6774	0.153875	no change	20	0	40	3	0	0
StLNC0216	3.69499	0.0545228	no change	5	10	2	0	0	1
StLNC1073	3.70203	0.00565666	up	63	68	19	3	0	7
StLNC0429	3.72172	0.0252055	up	136	105	12	13	3	0
StLNC0139	3.72861	0.118806	no change	28	0	2	1	0	1
StLNC1802	3.77005	0.0549407	no change	1	2	45	1	0	1
StLNC1529	3.82805	0.061206	no change	1	32	2	1	1	0
StLNC1029	3.84195	0.0840267	no change	2187	16380	2197	1127	0	52
StLNC2547	3.86884	0.125881	no change	20	0	18	0	0	2
StLNC1565	3.88875	0.131589	no change	0	9	42	2	0	0
StLNC1951	3.91241	1.5e-13	up	190	195	412	16	8	13
StLNC1121	3.92528	0.158809	no change	29	3	0	0	0	2
StLNC1840	3.93789	0.302852	no change	0	0	31	0	0	1
StLNC2346	3.9423	4.71e-12	up	689	347	616	25	29	26
StLNC0934	3.99087	2.28e-05	up	60	107	186	2	2	12
StLNC2136	4.01106	0.020331	up	8	26	8	0	2	0
StLNC1217	4.02603	0.0040815	up	10	20	12	1	0	1
StLNC1517	4.04964	0.0390317	up	7	1	20	0	1	0
StLNC2416	4.06508	0.145779	no change	2	19	0	1	0	0
StLNC1281	4.06784	0.0261737	up	26	3	12	0	0	2
StLNC1489	4.07316	0.00241281	up	17	21	29	0	0	3
StLNC0049	4.07331	0.0277858	up	396	195	706	51	1	0
StLNC0860	4.07942	6.62e-09	up	184	120	180	7	10	4
StLNC2450	4.22048	0.000128833	up	1260	1248	1934	23	9	153
StLNC1116	4.30524	0.0920925	no change	18	0	10	1	0	0
StLNC1842	4.32874	0.00173604	up	777	648	782	74	5	2
StLNC2472	4.3453	0.0572228	no change	9	2	3	0	0	0
StLNC0626	4.35733	0.197277	no change	0	7	10	0	0	0
StLNC0849	4.37169	0.134579	no change	1	25	0	0	1	0
StLNC2856	4.37447	0.248097	no change	0	0	42	0	0	1
StLNC1990	4.38255	0.264085	no change	13	0	0	0	0	0
StLNC0525	4.42543	0.0245308	up	10	1	25	1	0	0
StLNC1895	4.43142	0.00336049	up	33	8	15	1	1	0
StLNC0918	4.43824	0.0334245	up	6	6	3	0	0	0
StLNC2429	4.43855	0.25795	no change	0	14	0	0	0	0
StLNC1645	4.43891	0.0106225	up	9	15	5	0	1	0
StLNC0670	4.44138	0.240448	no change	0	0	44	0	0	1
StLNC0176	4.47207	0.194846	no change	3	0	18	0	0	0
StLNC2214	4.47332	0.0302726	up	8	3	5	0	0	0
StLNC2323	4.47994	0.0814573	no change	0	38	24	2	0	0
StLNC1548	4.52243	0.0604759	no change	11	1	4	0	0	0
StLNC1760	4.53179	0.247959	no change	0	0	24	0	0	0
StLNC0232	4.55112	0.191372	no change	4	11	0	0	0	0
StLNC0543	4.55891	6.28e-19	up	348	239	498	12	10	11
StLNC1893	4.55965	0.0198047	up	5	7	5	0	0	0
StLNC1875	4.56561	0.0845476	no change	22	7	0	1	0	0
StLNC2625	4.56655	0.226663	no change	0	0	48	0	0	1
StLNC2247	4.56999	0.0263605	up	2	7	10	0	0	0
StLNC0009	4.57129	0.17066	no change	0	6	15	0	0	0
StLNC0829	4.59038	0.241822	no change	0	0	25	0	0	0
StLNC0899	4.59621	0.223496	no change	0	0	49	0	0	1
StLNC0942	4.62174	0.081734	no change	4658	6146	8039	0	0	611
StLNC0782	4.62529	0.220269	no change	0	0	50	1	0	0
StLNC0402	4.62575	0.000273603	up	231	188	281	16	0	5
StLNC2465	4.62943	0.166007	no change	0	11	8	0	0	0
StLNC0488	4.63163	0.237566	no change	0	16	0	0	0	0
StLNC0274	4.65297	0.192479	no change	0	15	2	0	0	0
StLNC0191	4.67384	0.111995	no change	30	1	0	1	0	0
StLNC2059	4.683	0.232342	no change	16	0	0	0	0	0
StLNC1123	4.71851	0.155608	no change	11	0	9	0	0	0
StLNC2849	4.71927	0.228703	no change	0	17	0	0	0	0
StLNC2657	4.72563	0.160384	no change	0	4	21	0	0	0
StLNC0577	4.73404	0.192123	no change	0	1	26	0	0	0
StLNC2287	4.75277	0.173236	no change	15	0	3	0	0	0
StLNC0393	4.77069	0.223615	no change	17	0	0	0	0	0
StLNC1934	4.77069	0.223615	no change	17	0	0	0	0	0
StLNC0120	4.80189	0.220568	no change	0	18	0	0	0	0
StLNC0657	4.80351	0.22041	no change	0	0	29	0	0	0
StLNC2579	4.81591	0.16631	no change	0	2	26	0	0	0
StLNC1034	4.82067	0.0129787	up	6	9	5	0	0	0
StLNC1606	4.83249	0.0127958	up	7	3	13	0	0	0
StLNC0437	4.85728	0.0350038	up	5	1	20	0	0	0
StLNC1153	4.88499	0.134491	no change	10	0	14	0	0	0
StLNC0030	4.89768	0.0570007	no change	0	49	77	0	0	3
StLNC1855	4.89932	0.211245	no change	0	0	31	0	0	0
StLNC1945	4.90122	0.149183	no change	3	0	26	0	0	0
StLNC0863	4.90122	0.149183	no change	3	0	26	0	0	0
StLNC1508	4.90407	0.00713116	up	5	6	13	0	0	0
StLNC1158	4.91535	0.157144	no change	17	0	3	0	0	0
StLNC2213	4.94656	0.128273	no change	9	0	17	0	0	0
StLNC1388	4.95417	0.206126	no change	0	20	0	0	0	0
StLNC0573	4.97574	0.0853763	no change	1	0	62	1	0	0
StLNC0726	4.98554	0.00488722	up	7	7	10	0	0	0
StLNC0126	5.0057	0.201399	no change	20	0	0	0	0	0
StLNC1562	5.02877	4.63e-12	up	2598	4008	2850	79	30	120
StLNC1833	5.03334	0.140497	no change	18	0	4	0	0	0
StLNC2088	5.04471	0.0068064	up	41	71	6	3	0	0
StLNC2499	5.07624	0.195059	no change	21	0	0	0	0	0
StLNC0520	5.08925	0.114656	no change	11	0	17	0	0	0
StLNC1837	5.10319	0.00443933	up	8	9	8	0	0	0
StLNC1389	5.11424	0.191705	no change	0	0	36	0	0	0
StLNC0394	5.12978	0.000170137	up	25	34	32	0	0	2
StLNC1544	5.13538	0.110879	no change	0	9	22	0	0	0
StLNC0833	5.13675	0.110852	no change	0	14	14	0	0	0
StLNC0406	5.14349	0.189153	no change	22	0	0	0	0	0
StLNC2566	5.14378	0.00357879	up	8	9	9	0	0	0
StLNC0977	5.15612	0.188059	no change	0	23	0	0	0	0
StLNC2181	5.15612	0.188059	no change	0	23	0	0	0	0
StLNC1140	5.19197	0.184978	no change	0	0	38	0	0	0
StLNC0841	5.19197	0.184978	no change	0	0	38	0	0	0
StLNC1828	5.21761	0.182799	no change	0	24	0	0	0	0
StLNC1553	5.21761	0.182799	no change	0	24	0	0	0	0
StLNC0467	5.22144	0.138601	no change	2	22	0	0	0	0
StLNC2433	5.22932	0.18181	no change	0	0	39	0	0	0
StLNC0519	5.26925	0.178467	no change	24	0	0	0	0	0
StLNC2254	5.27658	0.177858	no change	0	25	0	0	0	0
StLNC2372	5.29236	0.110386	no change	8	17	0	0	0	0
StLNC2394	5.30368	0.0967141	no change	12	0	21	0	0	0
StLNC1024	5.3067	0.0968523	no change	0	10	25	0	0	0
StLNC0292	5.30939	0.0118582	up	5	18	4	0	0	0
StLNC2192	5.33324	0.173207	no change	0	26	0	0	0	0
StLNC2030	5.36975	0.170258	no change	0	0	43	0	0	0
StLNC0684	5.37924	0.0276438	up	22	1	5	0	0	0
StLNC1757	5.38493	0.169043	no change	26	0	0	0	0	0
StLNC2464	5.38493	0.169043	no change	26	0	0	0	0	0
StLNC1708	5.38776	0.168818	no change	0	27	0	0	0	0
StLNC2020	5.38776	0.168818	no change	0	27	0	0	0	0
StLNC2505	5.39646	0.00537179	up	36	2	22	1	0	0
StLNC1663	5.40282	0.16762	no change	0	0	44	0	0	0
StLNC2440	5.42439	0.00713643	up	9	16	4	0	0	0
StLNC2648	5.4255	0.12885	no change	1	0	43	0	0	0
StLNC1717	5.46018	0.00163622	up	7	8	21	0	0	0
StLNC1114	5.48318	0.000133505	up	18	17	33	0	1	0
StLNC2272	5.49202	0.160659	no change	28	0	0	0	0	0
StLNC0376	5.49892	0.0148354	up	17	1	17	0	0	0
StLNC2754	5.51168	0.0914185	no change	12	17	0	0	0	0
StLNC0646	5.51391	0.00113031	up	7	11	18	0	0	0
StLNC0487	5.51697	0.002477	up	7	6	26	0	0	0
StLNC2147	5.52475	0.0412598	up	0	132	140	4	0	0
StLNC1160	5.528	0.157914	no change	0	0	48	0	0	0
StLNC2156	5.5557	0.00171781	up	9	6	24	0	0	0
StLNC0439	5.55767	0.155678	no change	0	0	49	0	0	0
StLNC2041	5.56134	0.00013271	up	23	15	33	0	0	1
StLNC0871	5.57551	0.000932322	up	11	12	12	0	0	0
StLNC0106	5.57892	0.0928787	no change	23	7	0	0	0	0
StLNC0441	5.57956	0.083957	no change	7	0	38	0	0	0
StLNC2023	5.63781	0.000280991	up	19	11	51	0	0	1
StLNC2781	5.71437	0.00137638	up	11	17	9	0	0	0
StLNC1679	5.7207	0.143819	no change	0	34	0	0	0	0
StLNC1045	5.72409	0.135063	no change	64	0	0	0	0	1
StLNC2455	5.73335	0.00042296	up	12	12	16	0	0	0
StLNC0875	5.77252	0.1402	no change	34	0	0	0	0	0
StLNC1357	5.77252	0.1402	no change	34	0	0	0	0	0
StLNC0857	5.80325	0.138087	no change	0	36	0	0	0	0
StLNC1942	5.80341	0.0766528	no change	0	5	50	0	0	0
StLNC1653	5.81534	7.08e-06	up	44	38	78	2	0	0
StLNC0639	5.84916	0.134976	no change	0	0	60	0	0	0
StLNC1247	5.87725	0.0705506	no change	25	12	0	0	0	0
StLNC0571	5.88119	0.00070953	up	19	11	12	0	0	0
StLNC2349	5.89465	0.131948	no change	37	0	0	0	0	0
StLNC2283	5.97069	0.127005	no change	39	0	0	0	0	0
StLNC0885	6.00804	0.124631	no change	0	0	67	0	0	0
StLNC0417	6.05039	0.12198	no change	0	0	69	0	0	0
StLNC2132	6.07746	0.0594062	no change	15	28	0	0	0	0
StLNC1356	6.093	0.119359	no change	0	44	0	0	0	0
StLNC2106	6.13288	1.05e-06	up	71	96	126	3	0	0
StLNC1826	6.1449	0.116226	no change	44	0	0	0	0	0
StLNC1929	6.17735	0.0211267	up	2	44	1	0	0	0
StLNC1381	6.20909	0.112442	no change	46	0	0	0	0	0
StLNC2196	6.24015	0.110646	no change	47	0	0	0	0	0
StLNC2570	6.24015	0.110646	no change	47	0	0	0	0	0
StLNC1727	6.29106	0.0429534	up	23	0	43	0	0	0
StLNC0415	6.40739	0.0559478	no change	47	6	0	0	0	0
StLNC0172	6.44129	0.00133901	up	85	18	5	0	0	1
StLNC1927	6.49312	0.0968545	no change	56	0	0	0	0	0
StLNC1595	6.55214	0.0499526	up	4	0	91	0	0	0
StLNC2726	6.58849	0.00107538	up	29	29	5	0	0	0
StLNC1312	6.60929	0.00165529	up	1	54	109	0	0	1
StLNC0514	6.6166	0.0906432	no change	61	0	0	0	0	0
StLNC1094	6.63391	0.0897987	no change	0	64	0	0	0	0
StLNC1134	6.65183	0.034762	up	47	0	26	0	0	0
StLNC2412	6.68117	0.00735481	up	223	17	0	1	1	0
StLNC0801	6.71307	0.000215712	up	37	22	12	0	0	0
StLNC0627	6.73033	0.0852104	no change	66	0	0	0	0	0
StLNC2067	6.73949	1.28e-06	up	141	70	60	1	1	0
StLNC0186	6.83766	3.44e-05	up	29	12	51	0	0	0
StLNC2419	6.97148	5.66e-06	up	78	39	283	2	0	0
StLNC0940	6.975	0.00376779	up	0	390	861	0	5	1
StLNC0257	6.97824	0.0242916	up	36	0	71	0	0	0
StLNC1547	6.99665	2.93e-06	up	31	28	36	0	0	0
StLNC1500	7.03844	1.95e-05	up	13	39	52	0	0	0
StLNC2720	7.14007	0.0297219	up	0	8	134	0	0	0
StLNC0479	7.1764	0.0249378	up	75	0	25	0	0	0
StLNC0679	7.27008	0.00199821	up	167	20	1	0	0	1
StLNC0721	7.32882	4.29e-10	up	120	128	202	1	1	0
StLNC1366	7.44538	0.0196156	up	63	47	0	0	0	0
StLNC2314	7.48649	0.00196953	up	203	14	1	1	0	0
StLNC2578	7.48896	1.22e-05	up	68	25	33	0	0	0
StLNC1496	7.54763	1.17e-16	up	2480	1702	3869	21	6	3
StLNC2231	7.58722	0.017475	up	52	70	0	0	0	0
StLNC0308	7.62678	1.99e-07	up	47	46	53	0	0	0
StLNC1976	7.62692	0.000145588	up	8	95	39	0	0	0
StLNC0615	7.66797	5.18e-10	up	191	108	279	1	1	0
StLNC2410	7.71706	0.00105537	up	2	19	185	0	0	0
StLNC1394	7.83838	4.27e-10	up	222	111	320	1	1	0
StLNC0667	7.93735	2.43e-08	up	47	51	94	0	0	0
StLNC1901	7.99546	1.56e-06	up	85	53	38	0	0	0
StLNC1475	8.00481	4.43e-06	up	62	17	136	0	0	0
StLNC0332	8.05385	1.78e-07	up	393	206	1355	0	0	5
StLNC1991	8.19936	0.0124456	up	146	38	0	0	0	0
StLNC1075	8.43822	0.00896545	up	175	0	68	0	0	0
StLNC0651	8.79222	0.00100191	up	27	257	1	0	0	0
StLNC0192	9.07961	9.61e-10	up	157	105	131	0	0	0
StLNC2275	9.09662	5.19e-06	up	237	91	26	0	0	0
StLNC2352	9.15485	1.01e-10	up	135	131	156	0	0	0
StLNC1711	9.19038	0.0045065	up	102	0	438	0	0	0
StLNC0497	9.23626	8.61e-07	up	183	22	286	0	0	0
StLNC0133	9.24684	1.42e-05	up	56	690	23	0	0	1
StLNC0624	9.37501	2.36e-08	up	232	133	88	0	0	0
StLNC0583	9.38836	4.84e-10	up	191	148	139	0	0	0
StLNC1621	9.42147	2.17e-10	up	166	179	147	0	0	0
StLNC2167	9.46002	0.004706	up	344	97	0	0	0	0
StLNC2454	9.54892	2.43e-05	up	12	48	683	0	0	0
StLNC1463	10.3462	1.41e-08	up	280	60	790	0	0	0
StLNC0273	10.5975	8.4e-12	up	479	174	530	0	0	0
StLNC2663	10.672	0.00176302	up	867	0	246	0	0	0
StLNC0360	10.8788	0.00247735	up	1110	62	0	0	0	0
StLNC1349	10.9852	1.32e-10	up	157	805	547	0	0	0
StLNC1162	11.0922	7.34e-16	up	503	409	770	0	0	0
StLNC2234	11.3991	4.66e-15	up	770	415	852	0	0	0
StLNC2817	11.5789	8.53e-11	up	1240	195	793	0	0	0

## Sheet: mrt3_vs_mrt0
LncRNA	log2FC	pvalue	regulations	mrt3_1	mrt3_2	mrt3_3	mrt0_1	mrt0_2	mrt0_3
StLNC0013	-27.7951	5.58e-13	down	0	0	0	0	5452	4390
StLNC0744	-11.0233	0.00220376	down	0	0	0	103	0	1353
StLNC1826	-10.5259	0.0025416	down	0	0	0	623	0	182
StLNC1997	-10.0335	2.03e-08	down	0	0	0	233	23	373
StLNC0869	-9.41567	0.00115037	down	0	1	0	165	321	0
StLNC0655	-8.09424	0.0168279	down	0	0	0	101	24	0
StLNC0382	-8.08595	0.0140405	down	0	0	0	0	53	76
StLNC2104	-8.03379	9.34e-06	down	0	0	0	62	6	87
StLNC2390	-8.01358	0.0120033	down	0	0	0	58	0	104
StLNC2367	-7.83362	0.0229098	down	0	0	0	0	8	146
StLNC1023	-7.67618	0.0188169	down	0	0	0	0	28	84
StLNC0498	-7.66372	0.0230893	down	0	0	0	0	11	121
StLNC1942	-7.57783	0.0321197	down	0	0	0	8	56	0
StLNC2640	-7.54321	0.0171096	down	0	0	0	44	0	72
StLNC1962	-7.52476	0.00581562	down	0	1	0	163	0	28
StLNC0307	-7.49616	0.0223823	down	0	0	0	0	19	87
StLNC2720	-7.47558	0.00616282	down	0	2	0	230	0	183
StLNC0220	-7.43728	0.00776632	down	0	2	0	289	0	87
StLNC2139	-7.34351	0.0250858	down	0	0	0	0	35	38
StLNC2198	-7.30329	0.0329079	down	0	0	0	0	6	100
StLNC1220	-7.28156	2.34e-05	down	0	0	0	19	31	16
StLNC1753	-7.16421	0.031532	down	0	0	0	46	17	0
StLNC0134	-7.01373	2.34e-05	down	0	0	0	11	24	24
StLNC1239	-6.94473	0.0357449	down	0	0	0	0	10	66
StLNC0862	-6.93153	0.0763779	no change	0	0	0	0	39	0
StLNC0170	-6.90486	0.0334067	down	0	0	0	49	0	17
StLNC0587	-6.77951	0.0830949	no change	0	0	0	56	0	0
StLNC1085	-6.75771	0.00918808	down	0	1	0	0	34	75
StLNC0267	-6.72137	9.28e-05	down	0	0	0	7	11	41
StLNC1682	-6.6911	0.0401399	down	0	0	0	0	13	45
StLNC1075	-6.68991	0.0872747	no change	0	0	0	0	33	0
StLNC0204	-6.67266	0.0880985	no change	0	0	0	52	0	0
StLNC0090	-6.60997	3.88e-05	down	0	0	0	9	16	22
StLNC1626	-6.58596	0.0923355	no change	0	0	0	0	0	69
StLNC1796	-6.58596	0.0923355	no change	0	0	0	0	0	69
StLNC2673	-6.54428	0.0387584	down	0	0	0	17	0	43
StLNC0668	-6.5269	0.095315	no change	0	0	0	47	0	0
StLNC1589	-6.5269	0.095315	no change	0	0	0	47	0	0
StLNC2806	-6.48371	0.0787354	no change	0	0	0	0	1	62
StLNC0303	-6.47292	0.01069	down	0	0	1	64	0	34
StLNC1456	-6.35681	0.00713581	down	0	0	0	1	5	46
StLNC2464	-6.33607	0.105475	no change	0	0	0	0	0	58
StLNC1624	-6.30783	0.054111	no change	0	0	0	0	16	21
StLNC1857	-6.20843	0.112394	no change	1	0	0	0	46	0
StLNC0855	-6.17964	6.12e-09	down	3	0	0	65	42	77
StLNC2545	-6.15524	0.00228384	down	0	0	0	20	9	3
StLNC2588	-6.07689	0.0568859	no change	0	0	0	23	0	16
StLNC1549	-6.0639	0.121442	no change	0	0	0	0	0	48
StLNC2448	-6.06013	0.121676	no change	0	0	0	34	0	0
StLNC0673	-5.97536	0.00149297	down	0	0	0	4	5	28
StLNC1677	-5.90577	0.13156	no change	0	0	0	0	0	43
StLNC1290	-5.89263	0.0733233	no change	0	0	0	0	11	18
StLNC0488	-5.89048	0.132572	no change	0	0	0	0	19	0
StLNC1502	-5.87973	0.133287	no change	0	0	0	30	0	0
StLNC1646	-5.83733	0.136139	no change	0	0	0	0	0	41
StLNC1724	-5.83733	0.136139	no change	0	0	0	0	0	41
StLNC2052	-5.81283	0.0888721	no change	0	0	0	8	13	0
StLNC2539	-5.7803	0.140048	no change	0	0	0	28	0	0
StLNC0158	-5.73976	0.0998769	no change	0	0	0	5	14	0
StLNC1698	-5.7292	0.143624	no change	0	0	0	0	17	0
StLNC1756	-5.72789	0.143716	no change	0	0	0	27	0	0
StLNC2400	-5.70538	0.0158626	down	0	1	0	1	1	69
StLNC1727	-5.68985	0.146426	no change	0	0	0	0	0	37
StLNC1990	-5.68098	0.0804214	no change	0	0	0	19	0	10
StLNC1098	-5.65049	0.14927	no change	0	0	0	0	0	36
StLNC1418	-5.64125	0.149944	no change	0	0	0	0	16	0
StLNC1966	-5.63276	0.0796016	no change	0	0	0	16	0	13
StLNC2425	-5.61004	0.152238	no change	0	0	0	0	0	35
StLNC0355	-5.58449	0.104317	no change	0	0	0	7	11	0
StLNC0155	-5.56841	0.155339	no change	0	0	0	0	0	34
StLNC1391	-5.52555	0.158582	no change	0	0	0	0	0	33
StLNC0826	-5.50497	0.086162	no change	0	0	0	11	0	17
StLNC1697	-5.45409	0.102238	no change	0	0	0	0	6	18
StLNC1126	-5.44636	0.0429035	down	0	0	3	91	0	69
StLNC2080	-5.43581	0.165541	no change	0	0	0	0	0	31
StLNC1373	-5.43279	0.165778	no change	0	0	0	22	0	0
StLNC2309	-5.33978	0.173241	no change	0	0	0	0	13	0
StLNC0369	-5.33978	0.173241	no change	0	0	0	0	13	0
StLNC1188	-5.28539	0.0348775	down	1	0	0	8	0	43
StLNC0609	-5.27085	8.08e-07	down	0	2	2	64	36	41
StLNC0567	-5.23271	0.108416	no change	0	0	0	12	0	10
StLNC0054	-5.22159	0.183087	no change	0	0	0	19	0	0
StLNC1439	-5.16686	0.12204	no change	0	0	0	14	0	6
StLNC1423	-5.16143	0.0242262	down	0	1	0	1	1	46
StLNC0662	-5.07547	0.158725	no change	0	0	0	14	2	0
StLNC1613	-5.06873	0.196435	no change	0	0	0	0	0	24
StLNC2846	-5.06873	0.196435	no change	0	0	0	0	0	24
StLNC0759	-5.01466	0.139954	no change	0	0	0	0	5	12
StLNC0429	-4.97991	0.102272	no change	0	4	0	123	4	0
StLNC1523	-4.97407	0.205056	no change	0	0	0	16	0	0
StLNC0235	-4.95824	0.206525	no change	0	0	0	0	10	0
StLNC2831	-4.95824	0.206525	no change	0	0	0	0	10	0
StLNC1090	-4.88113	0.213788	no change	0	0	0	15	0	0
StLNC1767	-4.87744	0.214141	no change	0	0	0	0	0	21
StLNC1503	-4.87744	0.214141	no change	0	0	0	0	0	21
StLNC2788	-4.87047	0.00186162	down	0	0	2	10	8	49
StLNC1275	-4.86875	0.0501522	no change	0	135	0	1299	851	2008
StLNC2815	-4.85962	0.00613037	down	0	2	1	1	31	53
StLNC0463	-4.82887	0.00264224	down	1	1	0	11	23	5
StLNC0503	-4.81237	0.149976	no change	0	0	0	5	0	13
StLNC2202	-4.75067	0.000770464	down	3	0	0	9	18	39
StLNC1411	-4.7245	0.0635819	no change	2	0	0	0	9	37
StLNC2059	-4.51897	0.113911	no change	1	0	0	22	0	1
StLNC1871	-4.48564	0.252491	no change	0	0	1	0	14	0
StLNC2121	-4.45329	0.0585961	no change	0	1	1	2	0	60
StLNC1478	-4.43633	0.142155	no change	13	0	0	0	109	33
StLNC2016	-4.42475	0.0344198	down	2	0	1	46	0	12
StLNC2603	-4.2217	0.28181	no change	1	0	0	0	0	26
StLNC1656	-4.17041	0.192538	no change	5	2	0	0	63	0
StLNC2601	-4.09769	0.125563	no change	5	0	0	0	28	24
StLNC1974	-4.01998	0.0669981	no change	2	2	0	53	0	5
StLNC1266	-4.01772	0.128073	no change	532	0	0	1961	1130	3120
StLNC0764	-3.89198	0.000500835	down	8	0	3	23	25	102
StLNC1965	-3.88625	0.103865	no change	17	0	1	0	71	112
StLNC0504	-3.86703	0.000589985	down	34	7	9	443	22	169
StLNC2857	-3.86265	0.0672259	no change	4	4	0	0	43	46
StLNC2656	-3.81551	0.0175292	down	0	4	0	28	12	13
StLNC2764	-3.76519	0.0445868	down	1	0	0	3	6	2
StLNC1446	-3.75155	0.104564	no change	0	1	1	26	0	2
StLNC1723	-3.74814	0.13158	no change	2	18	0	0	42	284
StLNC1148	-3.73162	0.137972	no change	2	0	0	0	8	11
StLNC1713	-3.69399	0.190171	no change	6	0	0	0	4	69
StLNC0239	-3.66348	0.105276	no change	0	0	3	1	23	4
StLNC2785	-3.65375	0.0230266	down	9	0	0	16	22	45
StLNC1254	-3.62739	0.00681125	down	5	0	0	16	9	25
StLNC2351	-3.62022	0.23743	no change	0	11	0	106	21	0
StLNC2081	-3.60577	0.343377	no change	5	0	0	0	27	0
StLNC0279	-3.54767	0.00168672	down	6	9	4	8	73	118
StLNC2115	-3.52933	0.187211	no change	0	3	0	6	0	41
StLNC0380	-3.50072	0.0029606	down	5	4	0	11	16	72
StLNC1370	-3.4674	0.150043	no change	2	1	0	0	17	1
StLNC0640	-3.46638	0.01242	down	3	0	0	6	6	16
StLNC0900	-3.44471	0.0834432	no change	2	0	1	0	9	19
StLNC0992	-3.41485	0.1103	no change	0	0	13	28	69	18
StLNC1225	-3.38986	0.170284	no change	0	0	21	2	70	179
StLNC1788	-3.33754	0.0288638	down	6	0	0	10	15	17
StLNC1541	-3.3227	0.00673497	down	17	0	8	37	43	144
StLNC1249	-3.30915	0.0805197	no change	9	0	0	4	26	27
StLNC0768	-3.2938	0.00410995	down	4	1	1	5	19	22
StLNC2364	-3.2864	0.394407	no change	0	0	2	21	0	0
StLNC1854	-3.2584	0.387027	no change	10	0	0	0	42	0
StLNC1457	-3.25652	0.0226688	down	20	0	15	186	21	100
StLNC0123	-3.25275	0.1888	no change	38	395	2	0	1194	3191
StLNC0015	-3.21682	0.404651	no change	3	0	0	0	0	28
StLNC1685	-3.19878	0.0266941	down	19	0	17	192	23	90
StLNC1882	-3.19134	1.14e-08	down	75	19	22	342	165	393
StLNC2473	-3.16792	0.083134	no change	0	8	0	35	8	36
StLNC0050	-3.16608	0.0897778	no change	4	0	0	3	2	29
StLNC1366	-3.1659	0.148005	no change	48	0	0	153	72	46
StLNC1702	-3.12449	0.0132111	down	6	2	3	16	2	90
StLNC2239	-3.10311	0.411408	no change	8	0	0	0	0	68
StLNC1198	-3.07195	0.0155333	down	6	12	0	23	45	63
StLNC2126	-3.06609	0.17094	no change	0	17	0	41	4	140
StLNC1199	-3.06433	0.237954	no change	4	0	0	0	5	23
StLNC2453	-3.04889	0.00966332	down	1	1	1	8	7	6
StLNC2252	-3.03596	0.0248811	down	8	6	81	76	284	415
StLNC0097	-3.03078	0.248488	no change	0	0	3	19	0	10
StLNC1360	-3.01194	0.042377	down	5	0	0	12	8	9
StLNC0230	-3.01053	0.109333	no change	10	0	0	4	17	38
StLNC0800	-2.99121	6.07e-05	down	37	7	10	179	54	125
StLNC1829	-2.97722	0.261781	no change	6	0	0	0	11	23
StLNC2369	-2.94613	0.0963155	no change	83	29	0	545	56	59
StLNC1227	-2.9348	0.447461	no change	3	0	0	0	0	23
StLNC2214	-2.93371	0.0696679	no change	0	0	4	13	6	13
StLNC2389	-2.92674	0.0447324	down	1	3	4	2	32	12
StLNC1664	-2.89109	0.287285	no change	0	2	0	4	7	0
StLNC2627	-2.86034	0.288512	no change	0	2	0	0	2	16
StLNC0221	-2.81704	0.00489685	down	26	9	8	123	75	20
StLNC2841	-2.81665	0.00342908	down	5	3	2	35	13	10
StLNC2259	-2.79748	0.372345	no change	7	0	2	0	31	0
StLNC0695	-2.77128	0.153785	no change	3	1	0	17	0	7
StLNC2111	-2.7405	0.291254	no change	0	2	0	0	4	10
StLNC0724	-2.73389	0.000103743	down	3	4	4	20	12	40
StLNC0271	-2.6996	0.32243	no change	6	0	0	0	14	8
StLNC1246	-2.6895	0.223583	no change	6	0	0	25	1	2
StLNC1719	-2.67777	0.00156919	down	4	5	5	13	15	66
StLNC2077	-2.61582	0.364815	no change	0	11	0	34	0	50
StLNC2447	-2.60792	0.106183	no change	0	3	0	6	5	6
StLNC0823	-2.60336	0.158294	no change	0	2	29	42	92	23
StLNC2784	-2.59497	0.00407146	down	23	15	76	317	117	265
StLNC1793	-2.58193	0.129085	no change	5	0	0	5	9	5
StLNC0027	-2.57949	0.0975674	no change	195	6	1274	3463	1752	4159
StLNC0037	-2.56769	0.135287	no change	145	12	0	258	194	146
StLNC1553	-2.53278	0.410961	no change	0	0	21	70	0	89
StLNC0887	-2.49909	0.110297	no change	3	0	0	6	3	4
StLNC1824	-2.49305	0.0118061	down	4	13	8	43	9	114
StLNC2041	-2.48595	0.246842	no change	5	0	8	57	0	16
StLNC2528	-2.43947	0.149015	no change	11	1	1	1	31	6
StLNC1442	-2.42927	0.295305	no change	0	0	41	32	44	197
StLNC0663	-2.42862	0.388808	no change	0	5	0	24	0	5
StLNC0530	-2.41671	0.0426853	down	14	0	12	50	20	57
StLNC0470	-2.40365	0.142441	no change	11	4	2	0	25	49
StLNC0730	-2.38746	0.0760608	no change	10	0	17	44	15	92
StLNC0444	-2.36386	0.264817	no change	0	0	21	54	25	34
StLNC1157	-2.34345	8.31e-09	down	33	18	18	80	76	158
StLNC2067	-2.34283	0.360457	no change	12	0	14	0	74	3
StLNC2855	-2.33349	0.355389	no change	5	0	0	11	0	10
StLNC1382	-2.31315	0.278284	no change	5	0	1	17	4	0
StLNC2109	-2.31033	0.0497756	down	10	1	1	29	5	14
StLNC2277	-2.30129	0.306049	no change	0	3	5	7	22	0
StLNC1436	-2.27648	0.444267	no change	0	0	12	50	0	19
StLNC1763	-2.27571	0.180025	no change	3	2	6	31	13	0
StLNC1701	-2.26194	0.00144966	down	28	6	11	58	56	52
StLNC1076	-2.254	0.0951234	no change	3	10	0	9	13	41
StLNC2502	-2.25076	0.218424	no change	0	5	0	5	9	7
StLNC2296	-2.24669	0.477858	no change	0	6	0	0	18	1
StLNC2301	-2.24499	0.350649	no change	0	23	22	0	72	158
StLNC2170	-2.23601	0.470866	no change	45	0	0	61	0	122
StLNC0347	-2.2228	0.104413	no change	1	1	1	1	4	8
StLNC0491	-2.2221	0.245033	no change	4	0	2	1	14	1
StLNC2481	-2.2181	0.294234	no change	7	7	0	8	0	68
StLNC0687	-2.21506	0.257688	no change	25	0	0	31	18	31
StLNC2395	-2.20882	0.234484	no change	13	0	0	24	7	11
StLNC0883	-2.19869	0.0240593	down	10	3	29	64	38	93
StLNC0403	-2.18825	0.184943	no change	4	15	7	78	0	56
StLNC1511	-2.18379	0.330691	no change	8	0	0	23	1	2
StLNC2718	-2.18301	0.237472	no change	0	13	1	8	3	74
StLNC0762	-2.16613	0.137516	no change	30	7	0	13	41	69
StLNC1967	-2.16098	0.00872927	down	37	8	30	49	53	233
StLNC2654	-2.14236	0.0708489	no change	50	14	4	125	7	143
StLNC1455	-2.13428	0.00431191	down	4	9	8	42	13	37
StLNC2040	-2.11465	0.312907	no change	6	8	0	0	12	49
StLNC1897	-2.11462	0.578401	no change	0	4	0	0	0	25
StLNC0405	-2.11273	0.468063	no change	0	0	5	2	0	30
StLNC1491	-2.10259	0.549822	no change	229	0	0	448	0	331
StLNC2525	-2.09463	0.194873	no change	1	10	1	2	4	60
StLNC0452	-2.09152	0.137645	no change	3	4	0	3	3	26
StLNC0798	-2.07519	0.0979565	no change	4	0	3	5	3	22
StLNC0306	-2.0665	0.275548	no change	3	2	0	14	0	5
StLNC2037	-2.04747	0.541182	no change	20	0	1	0	39	0
StLNC1861	-2.03851	0.306503	no change	0	3	0	2	1	12
StLNC1263	-2.03286	0.186848	no change	26	17	3	108	32	1
StLNC0141	-2.01482	0.0979353	no change	11	6	0	8	17	31
StLNC1599	-2.01196	0.297093	no change	2	2	0	0	3	13
StLNC0258	-2.01007	0.0428258	down	11	37	81	108	120	341
StLNC0554	-2.00713	0.230341	no change	2	3	0	15	1	2
StLNC2680	-2.0038	0.0776392	no change	2	3	0	6	3	10
StLNC2477	-1.99952	0.105458	no change	1	2	9	14	4	40
StLNC1687	-1.99397	0.370626	no change	5	15	0	62	0	19
StLNC1070	-1.98458	0.0315457	down	90	41	16	92	205	95
StLNC1067	-1.98264	0.269584	no change	11	0	0	7	10	12
StLNC0237	-1.98046	0.605455	no change	0	3	0	0	0	17
StLNC0903	-1.97323	0.323164	no change	27	0	0	33	14	27
StLNC1173	-1.95859	0.538192	no change	0	25	0	35	41	0
StLNC1911	-1.95656	5.66e-05	down	2279	1565	2954	10027	4854	10204
StLNC0675	-1.95536	0.345032	no change	14	0	0	2	10	29
StLNC1017	-1.95429	0.00245325	down	24	7	8	61	23	44
StLNC1240	-1.94504	0.0630718	no change	12	9	7	8	47	22
StLNC2451	-1.93338	0.00244536	down	10	9	17	34	37	55
StLNC2507	-1.92069	0.338132	no change	1	3	0	0	5	9
StLNC0541	-1.91292	0.22483	no change	4	2	2	0	13	9
StLNC2387	-1.89261	0.0330743	down	2	6	3	18	5	18
StLNC1236	-1.88719	0.0390247	down	6	4	5	5	18	25
StLNC2273	-1.88671	0.622262	no change	0	0	3	12	0	0
StLNC2582	-1.86271	0.546752	no change	27	0	0	6	0	88
StLNC0154	-1.86049	0.0093258	down	31	14	16	24	55	118
StLNC0947	-1.85914	0.313777	no change	14	0	0	14	5	20
StLNC0224	-1.8577	0.0138471	down	9	6	2	24	12	16
StLNC0047	-1.84175	0.480572	no change	5	0	0	10	0	4
StLNC2843	-1.83507	0.000271221	down	38	28	25	57	78	161
StLNC1955	-1.83259	0.0299153	down	8	9	26	71	30	48
StLNC0638	-1.81774	0.39042	no change	0	0	7	2	12	8
StLNC0390	-1.81662	0.517571	no change	16	0	0	21	0	26
StLNC0819	-1.81009	0.0330574	down	13	11	4	11	31	39
StLNC0212	-1.81003	0.0476841	down	46	15	40	32	130	115
StLNC0653	-1.80897	0.481977	no change	5	0	0	9	0	5
StLNC0652	-1.80564	0.00502451	down	5	6	5	21	10	21
StLNC2700	-1.79203	0.556463	no change	31	0	0	0	30	38
StLNC0740	-1.78856	0.119657	no change	47	1	25	46	46	130
StLNC2417	-1.78511	0.0936946	no change	7	0	4	10	9	12
StLNC1053	-1.77892	0.574702	no change	0	10	0	2	21	0
StLNC1985	-1.77235	0.300205	no change	4	0	43	31	45	95
StLNC1772	-1.76859	0.0833159	no change	36	72	45	105	228	54
StLNC2730	-1.7635	0.595414	no change	0	0	41	108	28	0
StLNC0660	-1.75573	0.0498924	down	53	48	32	30	161	175
StLNC1000	-1.74687	0.597142	no change	0	0	13	47	0	1
StLNC1151	-1.73416	0.0783968	no change	9	7	7	4	24	40
StLNC1667	-1.72958	0.0740545	no change	7	9	4	6	25	23
StLNC1041	-1.72295	0.368915	no change	11	2	3	1	0	59
StLNC1623	-1.72257	0.318233	no change	35	32	38	0	96	245
StLNC1856	-1.72181	0.379699	no change	6	4	0	0	8	21
StLNC2565	-1.71972	0.278708	no change	8	9	10	0	18	79
StLNC0966	-1.70528	0.0251464	down	32	20	7	25	50	87
StLNC0249	-1.69696	0.378954	no change	0	6	0	6	7	4
StLNC1453	-1.69637	0.573044	no change	35	0	0	35	0	62
StLNC0549	-1.69442	0.453882	no change	1	2	1	0	0	17
StLNC1725	-1.69356	0.55062	no change	12	0	0	23	0	6
StLNC1182	-1.68686	0.493035	no change	36	1	0	16	0	96
StLNC1419	-1.68026	0.653649	no change	26	0	0	58	0	0
StLNC0021	-1.67606	0.484767	no change	0	0	73	111	49	94
StLNC0072	-1.67508	0.167302	no change	5	3	0	3	7	11
StLNC0377	-1.67347	0.383331	no change	4	0	3	0	6	14
StLNC1403	-1.67218	0.489986	no change	1	0	9	2	0	44
StLNC0710	-1.6547	0.133615	no change	16	10	6	3	33	47
StLNC2726	-1.64735	0.114211	no change	9	8	14	14	44	14
StLNC0396	-1.64432	0.66733	no change	5	0	0	0	7	0
StLNC0989	-1.64265	0.0296487	down	53	47	34	41	133	184
StLNC0366	-1.6394	0.00211094	down	32	14	32	57	54	113
StLNC2235	-1.63489	0.219718	no change	1	3	0	4	2	6
StLNC1159	-1.62232	0.500301	no change	57	26	0	175	0	42
StLNC1222	-1.61003	0.0405817	down	9	4	5	7	15	26
StLNC2758	-1.60765	0.1425	no change	8	3	0	11	6	10
StLNC1815	-1.59858	0.158341	no change	14	6	0	14	11	25
StLNC0749	-1.59499	0.0187481	down	54	40	11	84	41	177
StLNC0825	-1.57486	5.64e-06	down	31	25	20	72	40	98
StLNC1132	-1.57266	0.0828877	no change	11	11	7	6	21	56
StLNC2297	-1.56379	0.0886311	no change	1082	2562	5971	6304	6640	17688
StLNC0210	-1.5468	0.459782	no change	15	5	0	0	15	31
StLNC2141	-1.54022	0.68592	no change	0	0	4	0	8	0
StLNC2013	-1.54022	0.682273	no change	14	0	0	0	0	40
StLNC0747	-1.53208	0.514922	no change	0	29	0	4	26	58
StLNC2605	-1.52974	0.0361732	down	8	8	4	10	17	23
StLNC1847	-1.52809	0.362156	no change	0	15	35	107	19	25
StLNC2463	-1.50855	0.423274	no change	1	15	0	2	21	15
StLNC1371	-1.50851	0.166897	no change	8	5	2	2	11	25
StLNC1427	-1.50842	0.558444	no change	6	0	0	5	0	10
StLNC1359	-1.50693	0.508107	no change	0	41	0	58	24	34
StLNC2439	-1.50275	0.436112	no change	5	4	0	0	7	15
StLNC2456	-1.50222	0.689875	no change	0	9	0	0	0	37
StLNC2072	-1.497	0.114705	no change	181	124	300	1151	195	259
StLNC1906	-1.49283	0.10427	no change	12	8	3	26	16	8
StLNC2255	-1.49006	0.026293	down	172	132	100	123	293	616
StLNC0085	-1.48903	0.322456	no change	0	7	15	14	7	57
StLNC1844	-1.48764	0.160892	no change	3	1	10	13	10	14
StLNC1106	-1.48378	0.336252	no change	42	0	22	13	41	100
StLNC2258	-1.48311	0.0574349	no change	12	10	7	9	25	36
StLNC2175	-1.47679	0.0502273	no change	10	12	8	33	6	48
StLNC0656	-1.4685	0.199069	no change	7	9	0	13	10	15
StLNC2017	-1.44773	0.139318	no change	2	4	2	8	6	5
[truncated: 1,751 more rows]

## Sheet: mrt4_vs_mrt0
LncRNA	log2FC	pvalue	regulations	mrt4_1	mrt4_2	mrt4_3	mrt0_1	mrt0_2	mrt0_3
[truncated: 2,085 more rows]

[truncated: 2 more sheets: rt3_vs_rt0, rt4_vs_rt0]
