# Supplementary material for: Genome-Wide Identification and Characterization of Potato Long Non-coding RNAs Associated With Phytophthora infestans Resistance
Source: Front Plant Sci. 2021 Feb 10;12:619062. doi: 10.3389/fpls.2021.619062 (PMC7902931; doi:10.3389/fpls.2021.619062)
Supplement: Supplementary Table 11 — KEGG and GO enrichment analysis of specific DELs from P. infestans–infected samples in RB tissue. [file Table_11.XLSX]

## Sheet: KEGG
#PathwayID	PathwayName	GenesName	Gene Number	All Genes	Pvalue	Qvalue	PathwayLink
ko00196	Photosynthesis - antenna proteins	PGSC0003DMT400022072|PGSC0003DMT400021389|PGSC0003DMT400021388|PGSC0003DMT400043054|PGSC0003DMT400059995|PGSC0003DMT400083158|PGSC0003DMT400060313|PGSC0003DMT400021422|PGSC0003DMT400010985|PGSC0003DMT400049550|PGSC0003DMT400050232|PGSC0003DMT400092927|PGSC0003DMT400035006|PGSC0003DMT400021392|PGSC0003DMT400021390|PGSC0003DMT400021391|PGSC0003DMT400032790|PGSC0003DMT400034897|PGSC0003DMT400034896|…	24	37	3.11609e-13	7.50977e-11	http://www.genome.jp/kegg-bin/show_pathway?ko00196/K08907%09red/K08909%09red/K08914%09red/K08917%09red/K08916%09red/K08910%09red/K08913%09red/K08912%09red
ko03040	Spliceosome	PGSC0003DMT400017726|PGSC0003DMT400078069|PGSC0003DMT400014424|PGSC0003DMT400045694|PGSC0003DMT400063604|PGSC0003DMT400090250|PGSC0003DMT400023075|PGSC0003DMT400014744|PGSC0003DMT400012873|PGSC0003DMT400054608|PGSC0003DMT400029670|PGSC0003DMT400024406|PGSC0003DMT400021046|PGSC0003DMT400049444|PGSC0003DMT400068281|PGSC0003DMT400060729|PGSC0003DMT400033081|PGSC0003DMT400076269|PGSC0003DMT400056561|…	37	191	5.14543e-07	6.20024e-05	http://www.genome.jp/kegg-bin/show_pathway?ko03040/K10599%09red/K12900%09red/K12861%09red/K06063%09red/K12867%09red/K12844%09red/K12869%09red/K12840%09red/K12847%09red/K12829%09red/K11984%09red/K12881%09red/K12885%09red/K13025%09red/K12854%09red/K12662%09red/K12817%09red/K12815%09red/K11095%09red/K12624%09red/K12850%09red/K12818%09red/K11096%09red/K12837%09red/K12831%09red/K12873%09red/K12833%09r…
ko00195	Photosynthesis	PGSC0003DMT400057281|PGSC0003DMT400061613|PGSC0003DMT400045248|PGSC0003DMT400052738|PGSC0003DMT400051932|PGSC0003DMT400011522|PGSC0003DMT400014861|PGSC0003DMT400051899|PGSC0003DMT400071154|PGSC0003DMT400015075|PGSC0003DMT400057257|PGSC0003DMT400063056|PGSC0003DMT400054480|PGSC0003DMT400026009|PGSC0003DMT400086140|PGSC0003DMT400055931|PGSC0003DMT400071155|PGSC0003DMT400052777|PGSC0003DMT400043672	19	65	2.29615e-06	0.000184457	http://www.genome.jp/kegg-bin/show_pathway?ko00195/K02694%09red/K02113%09red/K02639%09red/K03541%09red/K02693%09red/K02109%09red/K02699%09red/K02701%09red/K03542%09red/K02717%09red/K02716%09red/K08905%09red/K02721%09red/K14332%09red/K08901%09red
ko04141	Protein processing in endoplasmic reticulum	PGSC0003DMT400055958|PGSC0003DMT400063543|PGSC0003DMT400056722|PGSC0003DMT400021142|PGSC0003DMT400012249|PGSC0003DMT400020867|PGSC0003DMT400078006|PGSC0003DMT400078007|PGSC0003DMT400078008|PGSC0003DMT400089913|PGSC0003DMT400068720|PGSC0003DMT400068726|PGSC0003DMT400068727|PGSC0003DMT400050079|PGSC0003DMT400060145|PGSC0003DMT400071311|PGSC0003DMT400034360|PGSC0003DMT400063662|PGSC0003DMT400078202|…	41	245	3.4922e-06	0.000210405	http://www.genome.jp/kegg-bin/show_pathway?ko04141/K13525%09red/K12666%09red/K09490%09red/K09503%09red/K13989%09red/K03094%09red/K10575%09red/K13993%09red/K14018%09red/K14009%09red/K10839%09red/K03347%09red/K01456%09red/K07953%09red/K14001%09red/K09580%09red
ko00480	Glutathione metabolism	PGSC0003DMT400005549|PGSC0003DMT400005571|PGSC0003DMT400005561|PGSC0003DMT400005558|PGSC0003DMT400005546|PGSC0003DMT400028619|PGSC0003DMT400051375|PGSC0003DMT400043105|PGSC0003DMT400079841|PGSC0003DMT400038054|PGSC0003DMT400004360|PGSC0003DMT400005547|PGSC0003DMT400020098|PGSC0003DMT400005557|PGSC0003DMT400002341|PGSC0003DMT400005532|PGSC0003DMT400074054	17	107	0.00390315	0.104518	http://www.genome.jp/kegg-bin/show_pathway?ko00480/K00799%09red/K00434%09red
ko04712	Circadian rhythm - plant	PGSC0003DMT400050252|PGSC0003DMT400036075|PGSC0003DMT400049874|PGSC0003DMT400029402|PGSC0003DMT400051416|PGSC0003DMT400034706|PGSC0003DMT400022039|PGSC0003DMT400047079|PGSC0003DMT400076178	9	44	0.00828472	0.199662	http://www.genome.jp/kegg-bin/show_pathway?ko04712/K10143%09red/K12118%09red/K16240%09red/K12116%09red/K12130%09red/K12126%09red/K00660%09red/K12127%09red
ko04075	Plant hormone signal transduction	PGSC0003DMT400049446|PGSC0003DMT400024428|PGSC0003DMT400049448|PGSC0003DMT400041156|PGSC0003DMT400011470|PGSC0003DMT400060922|PGSC0003DMT400004063|PGSC0003DMT400077712|PGSC0003DMT400009439|PGSC0003DMT400045204|PGSC0003DMT400093269|PGSC0003DMT400066533|PGSC0003DMT400055533|PGSC0003DMT400015610|PGSC0003DMT400035406|PGSC0003DMT400060160|PGSC0003DMT400023116|PGSC0003DMT400004086|PGSC0003DMT400023517|…	35	322	0.0161653	0.354166	http://www.genome.jp/kegg-bin/show_pathway?ko04075/K14486%09red/K14487%09red/K14484%09red/K14503%09red/K14432%09red/K14431%09red/K14492%09red/K14493%09red/K16189%09red/K14499%09red/K14497%09red/K14488%09red/K14498%09red/K14494%09red/K14495%09red/K12126%09red/K14509%09red/K13422%09red/K14514%09red/K14516%09red
ko00710	Carbon fixation in photosynthetic organisms	PGSC0003DMT400065411|PGSC0003DMT400052463|PGSC0003DMT400015282|PGSC0003DMT400062138|PGSC0003DMT400050381|PGSC0003DMT400032975|PGSC0003DMT400030248|PGSC0003DMT400024090|PGSC0003DMT400025881|PGSC0003DMT400069750|PGSC0003DMT400011335|PGSC0003DMT400008103	12	79	0.0186557	0.365256	http://www.genome.jp/kegg-bin/show_pathway?ko00710/K00855%09red/K03841%09red/K01100%09red/K01803%09red/K01807%09red/K01623%09red/K01602%09red/K05298%09red/K00026%09red
ko00860	Porphyrin and chlorophyll metabolism	PGSC0003DMT400036942|PGSC0003DMT400008034|PGSC0003DMT400029316|PGSC0003DMT400070176|PGSC0003DMT400058441|PGSC0003DMT400050234|PGSC0003DMT400002866|PGSC0003DMT400064369	8	43	0.0197026	0.365256	http://www.genome.jp/kegg-bin/show_pathway?ko00860/K02492%09red/K10960%09red/K00231%09red/K08101%09red/K03403%09red/K03428%09red/K00228%09red/K00218%09red
ko03420	Nucleotide excision repair	PGSC0003DMT400083292|PGSC0003DMT400064404|PGSC0003DMT400032941|PGSC0003DMT400017901|PGSC0003DMT400025613|PGSC0003DMT400076678|PGSC0003DMT400071759|PGSC0003DMT400015483|PGSC0003DMT400036057|PGSC0003DMT400078745|PGSC0003DMT400056773	11	83	0.0506137	0.755874	http://www.genome.jp/kegg-bin/show_pathway?ko03420/K03142%09red/K10840%09red/K10755%09red/K07466%09red/K10747%09red/K10839%09red/K10140%09red
ko00906	Carotenoid biosynthesis	PGSC0003DMT400047537|PGSC0003DMT400071048|PGSC0003DMT400061846|PGSC0003DMT400072543|PGSC0003DMT400074346|PGSC0003DMT400017594|PGSC0003DMT400004981	7	44	0.0533189	0.755874	http://www.genome.jp/kegg-bin/show_pathway?ko00906/K15746%09red/K09842%09red/K09843%09red/K02291%09red/K09835%09red/K09840%09red
ko00909	Sesquiterpenoid and triterpenoid biosynthesis	PGSC0003DMT400027448|PGSC0003DMT400008586|PGSC0003DMT400027291|PGSC0003DMT400027444	4	20	0.0738709	0.936994	http://www.genome.jp/kegg-bin/show_pathway?ko00909/K00511%09red/K15803%09red/K15472%09red
ko00591	Linoleic acid metabolism	PGSC0003DMT400028158|PGSC0003DMT400063477|PGSC0003DMT400063446|PGSC0003DMT400058933	4	21	0.0834686	0.939721	http://www.genome.jp/kegg-bin/show_pathway?ko00591/K00454%09red/K15718%09red
ko03008	Ribosome biogenesis in eukaryotes	PGSC0003DMT400007150|PGSC0003DMT400001746|PGSC0003DMT400051944|PGSC0003DMT400014917|PGSC0003DMT400032164|PGSC0003DMT400054941|PGSC0003DMT400061433|PGSC0003DMT400077605|PGSC0003DMT400046254|PGSC0003DMT400007765|PGSC0003DMT400041978	11	92	0.085605	0.939721	http://www.genome.jp/kegg-bin/show_pathway?ko03008/K14571%09red/K07562%09red/K14564%09red/K14567%09red/K14539%09red/K11883%09red/K11129%09red/K14538%09red/K06943%09red/K07178%09red/K07179%09red
ko00270	Cysteine and methionine metabolism	PGSC0003DMT400065411|PGSC0003DMT400063506|PGSC0003DMT400036990|PGSC0003DMT400024260|PGSC0003DMT400014587|PGSC0003DMT400030248|PGSC0003DMT400000553|PGSC0003DMT400026053|PGSC0003DMT400016646|PGSC0003DMT400032096|PGSC0003DMT400082065|PGSC0003DMT400057095	12	106	0.0992679	0.997096	http://www.genome.jp/kegg-bin/show_pathway?ko00270/K00026%09red/K08967%09red/K00640%09red/K00547%09red/K01611%09red/K00815%09red/K13034%09red/K01762%09red/K17398%09red
ko00051	Fructose and mannose metabolism	PGSC0003DMT400052463|PGSC0003DMT400065063|PGSC0003DMT400040409|PGSC0003DMT400067858|PGSC0003DMT400065447|PGSC0003DMT400011335|PGSC0003DMT400034299|PGSC0003DMT400008103|PGSC0003DMT400043111	9	74	0.104928	0.997096	http://www.genome.jp/kegg-bin/show_pathway?ko00051/K01809%09red/K00966%09red/K03841%09red/K00850%09red/K00844%09red/K01803%09red/K00895%09red/K00008%09red/K01623%09red
ko01040	Biosynthesis of unsaturated fatty acids	PGSC0003DMT400079080|PGSC0003DMT400007615|PGSC0003DMT400083859|PGSC0003DMT400061218|PGSC0003DMT400092081|PGSC0003DMT400002555|PGSC0003DMT400086433	7	57	0.137352	0.997096	http://www.genome.jp/kegg-bin/show_pathway?ko01040/K10256%09red/K03921%09red
ko00630	Glyoxylate and dicarboxylate metabolism	PGSC0003DMT400065411|PGSC0003DMT400032975|PGSC0003DMT400064264|PGSC0003DMT400062138|PGSC0003DMT400050381|PGSC0003DMT400015828|PGSC0003DMT400071115|PGSC0003DMT400030248|PGSC0003DMT400011851	9	81	0.150714	0.997096	http://www.genome.jp/kegg-bin/show_pathway?ko00630/K15893%09red/K11517%09red/K01602%09red/K00830%09red/K01455%09red/K00026%09red
ko04120	Ubiquitin mediated proteolysis	PGSC0003DMT400068720|PGSC0003DMT400047082|PGSC0003DMT400063662|PGSC0003DMT400068726|PGSC0003DMT400068727|PGSC0003DMT400036075|PGSC0003DMT400083067|PGSC0003DMT400056773|PGSC0003DMT400063955|PGSC0003DMT400067648|PGSC0003DMT400072624|PGSC0003DMT400015825|PGSC0003DMT400034706|PGSC0003DMT400071311|PGSC0003DMT400044280|PGSC0003DMT400039878	16	164	0.154932	0.997096	http://www.genome.jp/kegg-bin/show_pathway?ko04120/K10143%09red/K10140%09red/K10591%09red/K10579%09red/K03094%09red/K10575%09red/K10573%09red/K03875%09red/K10599%09red/K03347%09red/K12456%09red/K03358%09red
ko00941	Flavonoid biosynthesis	PGSC0003DMT400009287|PGSC0003DMT400016512|PGSC0003DMT400076178|PGSC0003DMT400078288|PGSC0003DMT400009175|PGSC0003DMT400038710|PGSC0003DMT400048126	7	62	0.180731	0.997096	http://www.genome.jp/kegg-bin/show_pathway?ko00941/K13065%09red/K13082%09red/K00475%09red/K00660%09red/K00588%09red/K00487%09red
ko00562	Inositol phosphate metabolism	PGSC0003DMT400036899|PGSC0003DMT400078346|PGSC0003DMT400096204|PGSC0003DMT400012721|PGSC0003DMT400071770|PGSC0003DMT400069760|PGSC0003DMT400011335	7	63	0.190032	0.997096	http://www.genome.jp/kegg-bin/show_pathway?ko00562/K05857%09red/K01803%09red/K00915%09red/K00921%09red/K01858%09red/K00913%09red
ko00072	Synthesis and degradation of ketone bodies	PGSC0003DMT400010866|PGSC0003DMT400032619	2	10	0.191183	0.997096	http://www.genome.jp/kegg-bin/show_pathway?ko00072/K01641%09red
ko00030	Pentose phosphate pathway	PGSC0003DMT400052463|PGSC0003DMT400028915|PGSC0003DMT400015282|PGSC0003DMT400043111|PGSC0003DMT400008103|PGSC0003DMT400065447	6	53	0.2041	0.997096	http://www.genome.jp/kegg-bin/show_pathway?ko00030/K03841%09red/K00850%09red/K00131%09red/K00895%09red/K01807%09red/K01623%09red
ko00760	Nicotinate and nicotinamide metabolism	PGSC0003DMT400027174|PGSC0003DMT400023145|PGSC0003DMT400057060	3	21	0.216699	0.997096	http://www.genome.jp/kegg-bin/show_pathway?ko00760/K06210%09red/K00858%09red/K01240%09red
ko03013	RNA transport	PGSC0003DMT400060112|PGSC0003DMT400043056|PGSC0003DMT400049444|PGSC0003DMT400049575|PGSC0003DMT400078293|PGSC0003DMT400001775|PGSC0003DMT400074245|PGSC0003DMT400060836|PGSC0003DMT400011661|PGSC0003DMT400034911|PGSC0003DMT400004200|PGSC0003DMT400076704|PGSC0003DMT400041978|PGSC0003DMT400019783	14	155	0.24753	0.997096	http://www.genome.jp/kegg-bin/show_pathway?ko03013/K07562%09red/K12881%09red/K12160%09red/K03239%09red/K03238%09red/K03113%09red/K00784%09red/K03259%09red/K03247%09red/K13025%09red/K03262%09red/K03253%09red/K03250%09red
ko03010	Ribosome	PGSC0003DMT400049608|PGSC0003DMT400061484|PGSC0003DMT400037556|PGSC0003DMT400076290|PGSC0003DMT400073431|PGSC0003DMT400006681|PGSC0003DMT400075291|PGSC0003DMT400036835|PGSC0003DMT400031869|PGSC0003DMT400054512|PGSC0003DMT400020315|PGSC0003DMT400076546|PGSC0003DMT400013052|PGSC0003DMT400048186|PGSC0003DMT400017646|PGSC0003DMT400002536|PGSC0003DMT400014381|PGSC0003DMT400069333|PGSC0003DMT400063593|…	26	309	0.251446	0.997096	http://www.genome.jp/kegg-bin/show_pathway?ko03010/K02879%09red/K02863%09red/K02955%09red/K02867%09red/K02937%09red/K02938%09red/K02868%09red/K02883%09red/K02991%09red/K02998%09red/K02935%09red/K02874%09red/K02877%09red/K02872%09red/K02873%09red/K02906%09red/K02925%09red/K02893%09red/K02903%09red/K02987%09red/K02981%09red/K02969%09red/K02942%09red
ko00970	Aminoacyl-tRNA biosynthesis	PGSC0003DMT400049361|PGSC0003DMT400064813|PGSC0003DMT400000946|PGSC0003DMT400073985|PGSC0003DMT400060831	5	46	0.257616	0.997096	http://www.genome.jp/kegg-bin/show_pathway?ko00970/K04567%09red/K01883%09red/K01893%09red/K01874%09red/K01887%09red
ko03022	Basal transcription factors	PGSC0003DMT400038588|PGSC0003DMT400071759|PGSC0003DMT400024197|PGSC0003DMT400065926	4	35	0.26609	0.997096	http://www.genome.jp/kegg-bin/show_pathway?ko03022/K03142%09red/K03132%09red/K03124%09red
ko04070	Phosphatidylinositol signaling system	PGSC0003DMT400036899|PGSC0003DMT400078346|PGSC0003DMT400096204|PGSC0003DMT400012721|PGSC0003DMT400046278|PGSC0003DMT400069760|PGSC0003DMT400014123	7	74	0.302725	0.997096	http://www.genome.jp/kegg-bin/show_pathway?ko04070/K00915%09red/K00921%09red/K05857%09red/K00913%09red/K02183%09red
ko00650	Butanoate metabolism	PGSC0003DMT400010866|PGSC0003DMT400032619|PGSC0003DMT400044163	3	26	0.309492	0.997096	http://www.genome.jp/kegg-bin/show_pathway?ko00650/K01641%09red/K17761%09red
ko04626	Plant-pathogen interaction	PGSC0003DMT400083027|PGSC0003DMT400026987|PGSC0003DMT400007736|PGSC0003DMT400071827|PGSC0003DMT400046278|PGSC0003DMT400014742|PGSC0003DMT400036734|PGSC0003DMT400027849|PGSC0003DMT400052233|PGSC0003DMT400091626|PGSC0003DMT400090967|PGSC0003DMT400078654|PGSC0003DMT400014123|PGSC0003DMT400059024|PGSC0003DMT400021079|PGSC0003DMT400063688|PGSC0003DMT400096032	17	207	0.338811	0.997096	http://www.genome.jp/kegg-bin/show_pathway?ko04626/K13456%09red/K18875%09red/K13448%09red/K13447%09red/K13433%09red/K13425%09red/K02183%09red
ko00062	Fatty acid elongation	PGSC0003DMT400032993|PGSC0003DMT400067205|PGSC0003DMT400015633|PGSC0003DMT400009451	4	40	0.343446	0.997096	http://www.genome.jp/kegg-bin/show_pathway?ko00062/K15397%09red
ko01200	Carbon metabolism	PGSC0003DMT400052463|PGSC0003DMT400064264|PGSC0003DMT400025881|PGSC0003DMT400071115|PGSC0003DMT400069750|PGSC0003DMT400065447|PGSC0003DMT400065411|PGSC0003DMT400057095|PGSC0003DMT400015828|PGSC0003DMT400030248|PGSC0003DMT400028915|PGSC0003DMT400062138|PGSC0003DMT400071652|PGSC0003DMT400016646|PGSC0003DMT400011335|PGSC0003DMT400034299|PGSC0003DMT400008103|PGSC0003DMT400015282|PGSC0003DMT400032975|…	22	277	0.362767	0.997096	http://www.genome.jp/kegg-bin/show_pathway?ko01200/K00855%09red/K03841%09red/K00850%09red/K00131%09red/K00658%09red/K00844%09red/K11517%09red/K01100%09red/K01803%09red/K00640%09red/K01807%09red/K01623%09red/K01602%09red/K05298%09red/K00830%09red/K15893%09red/K01455%09red/K00026%09red/K13034%09red
ko00770	Pantothenate and CoA biosynthesis	PGSC0003DMT400052673|PGSC0003DMT400071427|PGSC0003DMT400043667	3	29	0.366034	0.997096	http://www.genome.jp/kegg-bin/show_pathway?ko00770/K01922%09red/K00859%09red/K00053%09red
ko00900	Terpenoid backbone biosynthesis	PGSC0003DMT400010866|PGSC0003DMT400040485|PGSC0003DMT400069476|PGSC0003DMT400032619|PGSC0003DMT400018242|PGSC0003DMT400050234	6	68	0.380075	0.997096	http://www.genome.jp/kegg-bin/show_pathway?ko00900/K01641%09red/K13789%09red/K05356%09red/K10960%09red/K05955%09red
ko00920	Sulfur metabolism	PGSC0003DMT400016646|PGSC0003DMT400052064|PGSC0003DMT400057095	3	30	0.384746	0.997096	http://www.genome.jp/kegg-bin/show_pathway?ko00920/K13034%09red/K00387%09red/K00640%09red
ko03430	Mismatch repair	PGSC0003DMT400083292|PGSC0003DMT400017901|PGSC0003DMT400025613|PGSC0003DMT400076678|PGSC0003DMT400015483|PGSC0003DMT400078745	6	69	0.392326	0.997096	http://www.genome.jp/kegg-bin/show_pathway?ko03430/K07466%09red/K10755%09red/K10747%09red
ko04130	SNARE interactions in vesicular transport	PGSC0003DMT400028259|PGSC0003DMT400050219|PGSC0003DMT400054965|PGSC0003DMT400067225	4	44	0.405811	0.997096	http://www.genome.jp/kegg-bin/show_pathway?ko04130/K08515%09red/K08486%09red/K08504%09red/K08493%09red
ko00450	Selenocompound metabolism	PGSC0003DMT400053412|PGSC0003DMT400073985	2	19	0.417605	0.997096	http://www.genome.jp/kegg-bin/show_pathway?ko00450/K01874%09red/K08247%09red
ko00945	Stilbenoid, diarylheptanoid and gingerol biosynthesis	PGSC0003DMT400038710|PGSC0003DMT400048126|PGSC0003DMT400016512|PGSC0003DMT400078288	4	45	0.421262	0.997096	http://www.genome.jp/kegg-bin/show_pathway?ko00945/K00487%09red/K00588%09red/K13065%09red
ko00603	Glycosphingolipid biosynthesis - globo series	PGSC0003DMT400049203	1	7	0.427263	0.997096	http://www.genome.jp/kegg-bin/show_pathway?ko00603/K01988%09red
ko03030	DNA replication	PGSC0003DMT400083292|PGSC0003DMT400017901|PGSC0003DMT400025613|PGSC0003DMT400076678|PGSC0003DMT400015483|PGSC0003DMT400078745	6	72	0.42899	0.997096	http://www.genome.jp/kegg-bin/show_pathway?ko03030/K07466%09red/K10755%09red/K10747%09red
ko00460	Cyanoamino acid metabolism	PGSC0003DMT400016646|PGSC0003DMT400067695|PGSC0003DMT400064264|PGSC0003DMT400013037	4	46	0.436614	0.997096	http://www.genome.jp/kegg-bin/show_pathway?ko00460/K01455%09red/K13035%09red/K05350%09red/K13034%09red
ko00730	Thiamine metabolism	PGSC0003DMT400049574	1	9	0.501775	0.997096	http://www.genome.jp/kegg-bin/show_pathway?ko00730/K03146%09red
ko00510	N-Glycan biosynthesis	PGSC0003DMT400059987|PGSC0003DMT400047881|PGSC0003DMT400032896	3	37	0.510328	0.997096	http://www.genome.jp/kegg-bin/show_pathway?ko00510/K12666%09red/K00737%09red
ko00430	Taurine and hypotaurine metabolism	PGSC0003DMT400063273	1	10	0.535316	0.997096	http://www.genome.jp/kegg-bin/show_pathway?ko00430/K10712%09red
ko00592	alpha-Linolenic acid metabolism	PGSC0003DMT400048344|PGSC0003DMT400001350|PGSC0003DMT400001354|PGSC0003DMT400058933	4	53	0.539843	0.997096	http://www.genome.jp/kegg-bin/show_pathway?ko00592/K10529%09red/K00454%09red/K05894%09red
ko01212	Fatty acid metabolism	PGSC0003DMT400079080|PGSC0003DMT400007615|PGSC0003DMT400083859|PGSC0003DMT400061218|PGSC0003DMT400092081|PGSC0003DMT400002555|PGSC0003DMT400086433	7	98	0.565827	0.997096	http://www.genome.jp/kegg-bin/show_pathway?ko01212/K10256%09red/K03921%09red
ko00563	Glycosylphosphatidylinositol(GPI)-anchor biosynthesis	PGSC0003DMT400017920|PGSC0003DMT400050882	2	27	0.590015	0.997096	http://www.genome.jp/kegg-bin/show_pathway?ko00563/K05310%09red/K05289%09red
ko00052	Galactose metabolism	PGSC0003DMT400023090|PGSC0003DMT400034299|PGSC0003DMT400065447|PGSC0003DMT400012502	4	57	0.594309	0.997096	http://www.genome.jp/kegg-bin/show_pathway?ko00052/K01193%09red/K12309%09red/K00850%09red/K00844%09red
ko00511	Other glycan degradation	PGSC0003DMT400012502	1	12	0.595781	0.997096	http://www.genome.jp/kegg-bin/show_pathway?ko00511/K12309%09red
ko03060	Protein export	PGSC0003DMT400063543|PGSC0003DMT400001064|PGSC0003DMT400002877	3	43	0.606335	0.997096	http://www.genome.jp/kegg-bin/show_pathway?ko03060/K03070%09red/K09490%09red/K03217%09red
ko00360	Phenylalanine metabolism	PGSC0003DMT400078288|PGSC0003DMT400016512|PGSC0003DMT400024260|PGSC0003DMT400049886	4	58	0.607313	0.997096	http://www.genome.jp/kegg-bin/show_pathway?ko00360/K00588%09red/K00487%09red/K00815%09red/K10775%09red
ko03018	RNA degradation	PGSC0003DMT400073919|PGSC0003DMT400076269|PGSC0003DMT400005501|PGSC0003DMT400015074|PGSC0003DMT400065447|PGSC0003DMT400055058|PGSC0003DMT400015091	7	105	0.634657	0.997096	http://www.genome.jp/kegg-bin/show_pathway?ko03018/K14442%09red/K00850%09red/K12624%09red/K12592%09red/K12593%09red/K12581%09red/K12611%09red
ko00950	Isoquinoline alkaloid biosynthesis	PGSC0003DMT400048684|PGSC0003DMT400048706|PGSC0003DMT400024260	3	45	0.635417	0.997096	http://www.genome.jp/kegg-bin/show_pathway?ko00950/K00422%09red/K00815%09red
ko00590	Arachidonic acid metabolism	PGSC0003DMT400079969	1	14	0.648385	0.997096	http://www.genome.jp/kegg-bin/show_pathway?ko00590/K15730%09red
ko00531	Glycosaminoglycan degradation	PGSC0003DMT400012502	1	14	0.648385	0.997096	http://www.genome.jp/kegg-bin/show_pathway?ko00531/K12309%09red
ko03020	RNA polymerase	PGSC0003DMT400019706|PGSC0003DMT400077392|PGSC0003DMT400029782	3	46	0.649383	0.997096	http://www.genome.jp/kegg-bin/show_pathway?ko03020/K03021%09red/K03025%09red/K03013%09red
ko00250	Alanine, aspartate and glutamate metabolism	PGSC0003DMT400044163|PGSC0003DMT400011851|PGSC0003DMT400002558	3	48	0.676159	0.997096	http://www.genome.jp/kegg-bin/show_pathway?ko00250/K00609%09red/K00830%09red/K17761%09red
ko00010	Glycolysis / Gluconeogenesis	PGSC0003DMT400052463|PGSC0003DMT400028915|PGSC0003DMT400078075|PGSC0003DMT400065447|PGSC0003DMT400011335|PGSC0003DMT400034299|PGSC0003DMT400008103|PGSC0003DMT400043111	8	126	0.687091	0.997096	http://www.genome.jp/kegg-bin/show_pathway?ko00010/K03841%09red/K00850%09red/K00131%09red/K00844%09red/K01803%09red/K00895%09red/K01568%09red/K01623%09red
ko00600	Sphingolipid metabolism	PGSC0003DMT400058757|PGSC0003DMT400012502	2	33	0.692413	0.997096	http://www.genome.jp/kegg-bin/show_pathway?ko00600/K04712%09red/K12309%09red
ko00905	Brassinosteroid biosynthesis	PGSC0003DMT400061190	1	16	0.694148	0.997096	http://www.genome.jp/kegg-bin/show_pathway?ko00905/K09588%09red
ko00904	Diterpenoid biosynthesis	PGSC0003DMT400086139|PGSC0003DMT400071045|PGSC0003DMT400054848	3	51	0.713435	0.997096	http://www.genome.jp/kegg-bin/show_pathway?ko00904/K04124%09red/K04125%09red
ko00910	Nitrogen metabolism	PGSC0003DMT400064264|PGSC0003DMT400020910	2	35	0.72151	0.997096	http://www.genome.jp/kegg-bin/show_pathway?ko00910/K01455%09red/K01674%09red
ko00100	Steroid biosynthesis	PGSC0003DMT400047969|PGSC0003DMT400008586	2	36	0.735167	0.997096	http://www.genome.jp/kegg-bin/show_pathway?ko00100/K00511%09red/K08242%09red
ko04144	Endocytosis	PGSC0003DMT400006517|PGSC0003DMT400065740|PGSC0003DMT400006680|PGSC0003DMT400025590|PGSC0003DMT400072624|PGSC0003DMT400025211|PGSC0003DMT400041813|PGSC0003DMT400079981|PGSC0003DMT400001041|PGSC0003DMT400003226|PGSC0003DMT400021616|PGSC0003DMT400011952	12	194	0.738169	0.997096	http://www.genome.jp/kegg-bin/show_pathway?ko04144/K12183%09red/K12197%09red/K01115%09red/K11866%09red/K12471%09red/K07937%09red/K07904%09red/K07897%09red/K10591%09red
ko04933	AGE-RAGE signaling pathway in diabetic complications	PGSC0003DMT400069760	1	19	0.751879	0.997096	http://www.genome.jp/kegg-bin/show_pathway?ko04933/K05857%09red
ko03440	Homologous recombination	PGSC0003DMT400025613|PGSC0003DMT400083292|PGSC0003DMT400076678|PGSC0003DMT400088837|PGSC0003DMT400017901	5	88	0.758247	0.997096	http://www.genome.jp/kegg-bin/show_pathway?ko03440/K07466%09red/K10875%09red
ko00670	One carbon pool by folate	PGSC0003DMT400034522	1	21	0.784182	0.997096	http://www.genome.jp/kegg-bin/show_pathway?ko00670/K00601%09red
ko00130	Ubiquinone and other terpenoid-quinone biosynthesis	PGSC0003DMT400078288|PGSC0003DMT400024260	2	41	0.795142	0.997096	http://www.genome.jp/kegg-bin/show_pathway?ko00130/K00487%09red/K00815%09red
ko00020	Citrate cycle (TCA cycle)	PGSC0003DMT400065411|PGSC0003DMT400030248|PGSC0003DMT400071652	3	59	0.796552	0.997096	http://www.genome.jp/kegg-bin/show_pathway?ko00020/K00026%09red/K00658%09red
ko03410	Base excision repair	PGSC0003DMT400078745|PGSC0003DMT400069166	2	42	0.805589	0.997096	http://www.genome.jp/kegg-bin/show_pathway?ko03410/K10747%09red/K10773%09red
ko00520	Amino sugar and nucleotide sugar metabolism	PGSC0003DMT400010106|PGSC0003DMT400040409|PGSC0003DMT400020223|PGSC0003DMT400020437|PGSC0003DMT400034299|PGSC0003DMT400067858|PGSC0003DMT400064504	7	129	0.817095	0.997096	http://www.genome.jp/kegg-bin/show_pathway?ko00520/K01809%09red/K00966%09red/K13648%09red/K00844%09red/K08679%09red/K01183%09red
ko00565	Ether lipid metabolism	PGSC0003DMT400025590	1	24	0.82493	0.997096	http://www.genome.jp/kegg-bin/show_pathway?ko00565/K01115%09red
ko00061	Fatty acid biosynthesis	PGSC0003DMT400002555|PGSC0003DMT400079080	2	46	0.842776	0.997096	http://www.genome.jp/kegg-bin/show_pathway?ko00061/K03921%09red
ko00230	Purine metabolism	PGSC0003DMT400019706|PGSC0003DMT400034809|PGSC0003DMT400076168|PGSC0003DMT400029782|PGSC0003DMT400059281|PGSC0003DMT400077392|PGSC0003DMT400026512|PGSC0003DMT400034522	8	151	0.846606	0.997096	http://www.genome.jp/kegg-bin/show_pathway?ko00230/K03013%09red/K01519%09red/K01952%09red/K00601%09red/K03021%09red/K03025%09red/K00939%09red/K01933%09red
ko02010	ABC transporters	PGSC0003DMT400018820	1	26	0.847729	0.997096	http://www.genome.jp/kegg-bin/show_pathway?ko02010/K05658%09red
ko04145	Phagosome	PGSC0003DMT400006517|PGSC0003DMT400078346|PGSC0003DMT400079981|PGSC0003DMT400037093	4	84	0.851597	0.997096	http://www.genome.jp/kegg-bin/show_pathway?ko04145/K00921%09red/K07375%09red/K07897%09red
ko00350	Tyrosine metabolism	PGSC0003DMT400048684|PGSC0003DMT400048706|PGSC0003DMT400024260	3	66	0.851785	0.997096	http://www.genome.jp/kegg-bin/show_pathway?ko00350/K00422%09red/K00815%09red
ko04146	Peroxisome	PGSC0003DMT400071115|PGSC0003DMT400012262|PGSC0003DMT400011851|PGSC0003DMT400009629|PGSC0003DMT400042013	5	102	0.854447	0.997096	http://www.genome.jp/kegg-bin/show_pathway?ko04146/K11517%09red/K00830%09red/K13346%09red/K13337%09red/K13347%09red
ko00290	Valine, leucine and isoleucine biosynthesis	PGSC0003DMT400052673	1	27	0.85799	0.997096	http://www.genome.jp/kegg-bin/show_pathway?ko00290/K00053%09red
ko00053	Ascorbate and aldarate metabolism	PGSC0003DMT400004360|PGSC0003DMT400002341	2	50	0.87339	0.997096	http://www.genome.jp/kegg-bin/show_pathway?ko00053/K00434%09red
ko00240	Pyrimidine metabolism	PGSC0003DMT400019706|PGSC0003DMT400076168|PGSC0003DMT400029782|PGSC0003DMT400023145|PGSC0003DMT400077392|PGSC0003DMT400002558	6	124	0.877707	0.997096	http://www.genome.jp/kegg-bin/show_pathway?ko00240/K01519%09red/K01240%09red/K03021%09red/K03025%09red/K03013%09red/K00609%09red
ko00190	Oxidative phosphorylation	PGSC0003DMT400052738|PGSC0003DMT400045783|PGSC0003DMT400005639|PGSC0003DMT400032530|PGSC0003DMT400052777|PGSC0003DMT400043672	6	124	0.877707	0.997096	http://www.genome.jp/kegg-bin/show_pathway?ko00190/K02140%09red/K02113%09red/K02267%09red/K02109%09red/K03952%09red
ko03015	mRNA surveillance pathway	PGSC0003DMT400046377|PGSC0003DMT400001821|PGSC0003DMT400049444|PGSC0003DMT400019783|PGSC0003DMT400014674	5	107	0.880016	0.997096	http://www.genome.jp/kegg-bin/show_pathway?ko03015/K13025%09red/K12881%09red/K14416%09red/K14403%09red/K14397%09red
ko00400	Phenylalanine, tyrosine and tryptophan biosynthesis	PGSC0003DMT400024260|PGSC0003DMT400052381	2	52	0.886547	0.997096	http://www.genome.jp/kegg-bin/show_pathway?ko00400/K00815%09red/K15227%09red
ko00260	Glycine, serine and threonine metabolism	PGSC0003DMT400083025|PGSC0003DMT400011851|PGSC0003DMT400015828	3	76	0.907857	0.997096	http://www.genome.jp/kegg-bin/show_pathway?ko00260/K15893%09red/K00830%09red/K00130%09red
ko00960	Tropane, piperidine and pyridine alkaloid biosynthesis	PGSC0003DMT400024260	1	35	0.918744	0.997096	http://www.genome.jp/kegg-bin/show_pathway?ko00960/K00815%09red
ko00908	Zeatin biosynthesis	PGSC0003DMT400070120|PGSC0003DMT400086002|PGSC0003DMT400075854|PGSC0003DMT400033101	4	98	0.918814	0.997096	http://www.genome.jp/kegg-bin/show_pathway?ko00908/K13495%09red
ko00561	Glycerolipid metabolism	PGSC0003DMT400000446|PGSC0003DMT400000747|PGSC0003DMT400072563	3	80	0.924305	0.997096	http://www.genome.jp/kegg-bin/show_pathway?ko00561/K11155%09red/K09480%09red
ko00500	Starch and sucrose metabolism	PGSC0003DMT400018267|PGSC0003DMT400052839|PGSC0003DMT400023513|PGSC0003DMT400020223|PGSC0003DMT400023090|PGSC0003DMT400076112|PGSC0003DMT400020437|PGSC0003DMT400013037|PGSC0003DMT400046192|PGSC0003DMT400010106|PGSC0003DMT400034299|PGSC0003DMT400040467	12	245	0.933476	0.997096	http://www.genome.jp/kegg-bin/show_pathway?ko00500/K01193%09red/K01177%09red/K13648%09red/K19891%09red/K08679%09red/K16055%09red/K00844%09red/K01051%09red/K05350%09red/K01087%09red/K19893%09red
ko00073	Cutin, suberine and wax biosynthesis	PGSC0003DMT400080690	1	40	0.942687	0.997096	http://www.genome.jp/kegg-bin/show_pathway?ko00073/K13407%09red
ko00280	Valine, leucine and isoleucine degradation	PGSC0003DMT400010866|PGSC0003DMT400032619	2	70	0.95918	0.997096	http://www.genome.jp/kegg-bin/show_pathway?ko00280/K01641%09red
ko00940	Phenylpropanoid biosynthesis	PGSC0003DMT400013037|PGSC0003DMT400016512|PGSC0003DMT400047469|PGSC0003DMT400064270|PGSC0003DMT400048126|PGSC0003DMT400054502|PGSC0003DMT400078288|PGSC0003DMT400038710|PGSC0003DMT400032789|PGSC0003DMT400049886	10	229	0.964217	0.997096	http://www.genome.jp/kegg-bin/show_pathway?ko00940/K13065%09red/K10775%09red/K00083%09red/K05350%09red/K00588%09red/K00487%09red/K00430%09red
ko00620	Pyruvate metabolism	PGSC0003DMT400065411|PGSC0003DMT400030248|PGSC0003DMT400042417	3	95	0.964772	0.997096	http://www.genome.jp/kegg-bin/show_pathway?ko00620/K00026%09red/K01759%09red
ko00310	Lysine degradation	PGSC0003DMT400071652	1	49	0.969433	0.997096	http://www.genome.jp/kegg-bin/show_pathway?ko00310/K00658%09red
ko01210	2-Oxocarboxylic acid metabolism	PGSC0003DMT400052673	1	57	0.982524	0.997096	http://www.genome.jp/kegg-bin/show_pathway?ko01210/K00053%09red
ko00380	Tryptophan metabolism	PGSC0003DMT400046854	1	57	0.982524	0.997096	http://www.genome.jp/kegg-bin/show_pathway?ko00380/K07408%09red
ko01230	Biosynthesis of amino acids	PGSC0003DMT400052673|PGSC0003DMT400057095|PGSC0003DMT400015282|PGSC0003DMT400065447|PGSC0003DMT400016646|PGSC0003DMT400011335|PGSC0003DMT400008103|PGSC0003DMT400052381|PGSC0003DMT400024260	9	233	0.984545	0.997096	http://www.genome.jp/kegg-bin/show_pathway?ko01230/K00850%09red/K01803%09red/K00640%09red/K01807%09red/K01623%09red/K00815%09red/K13034%09red/K00053%09red/K15227%09red
ko03050	Proteasome	PGSC0003DMT400062813	1	60	0.98583	0.997096	http://www.genome.jp/kegg-bin/show_pathway?ko03050/K03039%09red
ko00330	Arginine and proline metabolism	PGSC0003DMT400026053	1	64	0.989287	0.997096	http://www.genome.jp/kegg-bin/show_pathway?ko00330/K01611%09red
ko00564	Glycerophospholipid metabolism	PGSC0003DMT400025590|PGSC0003DMT400078517	2	94	0.990254	0.997096	http://www.genome.jp/kegg-bin/show_pathway?ko00564/K08730%09red/K01115%09red
ko00040	Pentose and glucuronate interconversions	PGSC0003DMT400065063|PGSC0003DMT400046192	2	135	0.999244	0.999244	http://www.genome.jp/kegg-bin/show_pathway?ko00040/K01051%09red/K00008%09red

## Sheet: GO
GO_accession	Description	GeneNames	Ontology	pValue	qValue	Gene Number	All Genes
GO:0015979	photosynthesis	PGSC0003DMT400001417,PGSC0003DMT400005977,PGSC0003DMT400010985,PGSC0003DMT400011335,PGSC0003DMT400011811,PGSC0003DMT400014861,PGSC0003DMT400016981,PGSC0003DMT400018798,PGSC0003DMT400021388,PGSC0003DMT400021389,PGSC0003DMT400021390,PGSC0003DMT400021391,PGSC0003DMT400021392,PGSC0003DMT400021422,PGSC0003DMT400022072,PGSC0003DMT400022987,PGSC0003DMT400023336,PGSC0003DMT400023432,PGSC0003DMT400024090,…	BP	2.2e-27	5.17e-25	62	161
GO:0018298	protein-chromophore linkage	PGSC0003DMT400010985,PGSC0003DMT400021388,PGSC0003DMT400021389,PGSC0003DMT400021390,PGSC0003DMT400021391,PGSC0003DMT400021392,PGSC0003DMT400021422,PGSC0003DMT400022039,PGSC0003DMT400022072,PGSC0003DMT400022987,PGSC0003DMT400032790,PGSC0003DMT400034896,PGSC0003DMT400034897,PGSC0003DMT400034899,PGSC0003DMT400034902,PGSC0003DMT400035006,PGSC0003DMT400035007,PGSC0003DMT400043054,PGSC0003DMT400049550,…	BP	8.4e-15	9.87e-13	29	68
GO:0050896	response to stimulus	PGSC0003DMT400000192,PGSC0003DMT400000365,PGSC0003DMT400000985,PGSC0003DMT400001350,PGSC0003DMT400001354,PGSC0003DMT400002019,PGSC0003DMT400002375,PGSC0003DMT400003078,PGSC0003DMT400003228,PGSC0003DMT400003784,PGSC0003DMT400003796,PGSC0003DMT400004046,PGSC0003DMT400004063,PGSC0003DMT400004695,PGSC0003DMT400005086,PGSC0003DMT400005512,PGSC0003DMT400005532,PGSC0003DMT400005546,PGSC0003DMT400005547,…	BP	2.3e-13	1.80167e-11	237	1933
GO:0042221	response to chemical	PGSC0003DMT400000192,PGSC0003DMT400000365,PGSC0003DMT400000985,PGSC0003DMT400001350,PGSC0003DMT400001354,PGSC0003DMT400002375,PGSC0003DMT400003228,PGSC0003DMT400003784,PGSC0003DMT400003796,PGSC0003DMT400004063,PGSC0003DMT400004695,PGSC0003DMT400005512,PGSC0003DMT400005532,PGSC0003DMT400005547,PGSC0003DMT400005549,PGSC0003DMT400005557,PGSC0003DMT400005558,PGSC0003DMT400005561,PGSC0003DMT400005571,…	BP	8.8e-09	5.17e-07	133	1028
GO:0009628	response to abiotic stimulus	PGSC0003DMT400000985,PGSC0003DMT400003078,PGSC0003DMT400003796,PGSC0003DMT400008044,PGSC0003DMT400008264,PGSC0003DMT400009328,PGSC0003DMT400011627,PGSC0003DMT400011979,PGSC0003DMT400015828,PGSC0003DMT400018643,PGSC0003DMT400018728,PGSC0003DMT400018798,PGSC0003DMT400020425,PGSC0003DMT400021498,PGSC0003DMT400022039,PGSC0003DMT400023336,PGSC0003DMT400023432,PGSC0003DMT400023459,PGSC0003DMT400025712,…	BP	1.3e-08	6.11e-07	69	427
GO:0051716	cellular response to stimulus	PGSC0003DMT400000192,PGSC0003DMT400000365,PGSC0003DMT400001350,PGSC0003DMT400001354,PGSC0003DMT400002375,PGSC0003DMT400003078,PGSC0003DMT400003228,PGSC0003DMT400003784,PGSC0003DMT400004063,PGSC0003DMT400005512,PGSC0003DMT400005532,PGSC0003DMT400005547,PGSC0003DMT400005549,PGSC0003DMT400005557,PGSC0003DMT400005558,PGSC0003DMT400005561,PGSC0003DMT400005571,PGSC0003DMT400005836,PGSC0003DMT400006170,…	BP	1.4e-08	5.48333e-07	134	1046
GO:0070887	cellular response to chemical stimulus	PGSC0003DMT400000192,PGSC0003DMT400000365,PGSC0003DMT400001350,PGSC0003DMT400001354,PGSC0003DMT400002375,PGSC0003DMT400003228,PGSC0003DMT400003784,PGSC0003DMT400004063,PGSC0003DMT400005512,PGSC0003DMT400005532,PGSC0003DMT400005547,PGSC0003DMT400005549,PGSC0003DMT400005557,PGSC0003DMT400005558,PGSC0003DMT400005561,PGSC0003DMT400005571,PGSC0003DMT400005836,PGSC0003DMT400006170,PGSC0003DMT400007511,…	BP	4.6e-08	1.54429e-06	100	728
GO:0009314	response to radiation	PGSC0003DMT400003078,PGSC0003DMT400008044,PGSC0003DMT400008264,PGSC0003DMT400009328,PGSC0003DMT400015828,PGSC0003DMT400018728,PGSC0003DMT400018798,PGSC0003DMT400020425,PGSC0003DMT400022039,PGSC0003DMT400023336,PGSC0003DMT400023432,PGSC0003DMT400023459,PGSC0003DMT400025712,PGSC0003DMT400033827,PGSC0003DMT400034706,PGSC0003DMT400036075,PGSC0003DMT400042742,PGSC0003DMT400044163,PGSC0003DMT400044562,…	BP	8.9e-08	2.32389e-06	37	180
GO:0009416	response to light stimulus	PGSC0003DMT400003078,PGSC0003DMT400008044,PGSC0003DMT400008264,PGSC0003DMT400009328,PGSC0003DMT400015828,PGSC0003DMT400018728,PGSC0003DMT400018798,PGSC0003DMT400020425,PGSC0003DMT400022039,PGSC0003DMT400023336,PGSC0003DMT400023432,PGSC0003DMT400023459,PGSC0003DMT400025712,PGSC0003DMT400033827,PGSC0003DMT400034706,PGSC0003DMT400036075,PGSC0003DMT400042742,PGSC0003DMT400044163,PGSC0003DMT400044562,…	BP	8.9e-08	2.32389e-06	37	180
GO:0010033	response to organic substance	PGSC0003DMT400000192,PGSC0003DMT400000365,PGSC0003DMT400001350,PGSC0003DMT400001354,PGSC0003DMT400002375,PGSC0003DMT400003228,PGSC0003DMT400003784,PGSC0003DMT400004063,PGSC0003DMT400004695,PGSC0003DMT400005512,PGSC0003DMT400005532,PGSC0003DMT400005547,PGSC0003DMT400005549,PGSC0003DMT400005557,PGSC0003DMT400005558,PGSC0003DMT400005561,PGSC0003DMT400005571,PGSC0003DMT400005836,PGSC0003DMT400006170,…	BP	8.9e-08	2.32389e-06	116	895
GO:0007165	signal transduction	PGSC0003DMT400000365,PGSC0003DMT400002375,PGSC0003DMT400003078,PGSC0003DMT400003228,PGSC0003DMT400003784,PGSC0003DMT400004063,PGSC0003DMT400005512,PGSC0003DMT400005532,PGSC0003DMT400005547,PGSC0003DMT400005549,PGSC0003DMT400005557,PGSC0003DMT400005558,PGSC0003DMT400005561,PGSC0003DMT400005571,PGSC0003DMT400005836,PGSC0003DMT400006170,PGSC0003DMT400007511,PGSC0003DMT400008560,PGSC0003DMT400009439,…	BP	2.5e-07	5.34091e-06	99	743
GO:0023052	signaling	PGSC0003DMT400000365,PGSC0003DMT400002375,PGSC0003DMT400003078,PGSC0003DMT400003228,PGSC0003DMT400003784,PGSC0003DMT400004063,PGSC0003DMT400005512,PGSC0003DMT400005532,PGSC0003DMT400005547,PGSC0003DMT400005549,PGSC0003DMT400005557,PGSC0003DMT400005558,PGSC0003DMT400005561,PGSC0003DMT400005571,PGSC0003DMT400005836,PGSC0003DMT400006170,PGSC0003DMT400007511,PGSC0003DMT400008560,PGSC0003DMT400009439,…	BP	3e-07	5.64e-06	99	746
GO:0032870	cellular response to hormone stimulus	PGSC0003DMT400000365,PGSC0003DMT400001350,PGSC0003DMT400001354,PGSC0003DMT400002375,PGSC0003DMT400003228,PGSC0003DMT400003784,PGSC0003DMT400004063,PGSC0003DMT400005512,PGSC0003DMT400005532,PGSC0003DMT400005547,PGSC0003DMT400005549,PGSC0003DMT400005557,PGSC0003DMT400005558,PGSC0003DMT400005561,PGSC0003DMT400005571,PGSC0003DMT400005836,PGSC0003DMT400006170,PGSC0003DMT400007511,PGSC0003DMT400008560,…	BP	3e-07	5.64e-06	92	678
GO:0071495	cellular response to endogenous stimulus	PGSC0003DMT400000365,PGSC0003DMT400001350,PGSC0003DMT400001354,PGSC0003DMT400002375,PGSC0003DMT400003228,PGSC0003DMT400003784,PGSC0003DMT400004063,PGSC0003DMT400005512,PGSC0003DMT400005532,PGSC0003DMT400005547,PGSC0003DMT400005549,PGSC0003DMT400005557,PGSC0003DMT400005558,PGSC0003DMT400005561,PGSC0003DMT400005571,PGSC0003DMT400005836,PGSC0003DMT400006170,PGSC0003DMT400007511,PGSC0003DMT400008560,…	BP	3.3e-07	5.53929e-06	93	689
GO:0050794	regulation of cellular process	PGSC0003DMT400000192,PGSC0003DMT400000365,PGSC0003DMT400000547,PGSC0003DMT400002375,PGSC0003DMT400003078,PGSC0003DMT400003228,PGSC0003DMT400003784,PGSC0003DMT400003796,PGSC0003DMT400004063,PGSC0003DMT400005512,PGSC0003DMT400005532,PGSC0003DMT400005547,PGSC0003DMT400005549,PGSC0003DMT400005557,PGSC0003DMT400005558,PGSC0003DMT400005561,PGSC0003DMT400005571,PGSC0003DMT400005836,PGSC0003DMT400006170,…	BP	3.7e-07	5.79667e-06	134	1103
GO:0044267	cellular protein metabolic process	PGSC0003DMT400000192,PGSC0003DMT400000946,PGSC0003DMT400002312,PGSC0003DMT400004200,PGSC0003DMT400005512,PGSC0003DMT400007325,PGSC0003DMT400008560,PGSC0003DMT400009802,PGSC0003DMT400010431,PGSC0003DMT400010881,PGSC0003DMT400010985,PGSC0003DMT400011562,PGSC0003DMT400011661,PGSC0003DMT400012001,PGSC0003DMT400014493,PGSC0003DMT400014816,PGSC0003DMT400015306,PGSC0003DMT400015825,PGSC0003DMT400016998,…	BP	4.6e-07	6.75625e-06	109	852
GO:0007154	cell communication	PGSC0003DMT400000365,PGSC0003DMT400002375,PGSC0003DMT400003078,PGSC0003DMT400003228,PGSC0003DMT400003784,PGSC0003DMT400004063,PGSC0003DMT400005512,PGSC0003DMT400005532,PGSC0003DMT400005547,PGSC0003DMT400005549,PGSC0003DMT400005557,PGSC0003DMT400005558,PGSC0003DMT400005561,PGSC0003DMT400005571,PGSC0003DMT400005836,PGSC0003DMT400006170,PGSC0003DMT400007511,PGSC0003DMT400008560,PGSC0003DMT400009439,…	BP	5.1e-07	7.05e-06	102	784
GO:0071310	cellular response to organic substance	PGSC0003DMT400000365,PGSC0003DMT400001350,PGSC0003DMT400001354,PGSC0003DMT400002375,PGSC0003DMT400003228,PGSC0003DMT400003784,PGSC0003DMT400004063,PGSC0003DMT400005512,PGSC0003DMT400005532,PGSC0003DMT400005547,PGSC0003DMT400005549,PGSC0003DMT400005557,PGSC0003DMT400005558,PGSC0003DMT400005561,PGSC0003DMT400005571,PGSC0003DMT400005836,PGSC0003DMT400006170,PGSC0003DMT400007511,PGSC0003DMT400008560,…	BP	5.3e-07	6.91944e-06	93	696
GO:0009755	hormone-mediated signaling pathway	PGSC0003DMT400000365,PGSC0003DMT400002375,PGSC0003DMT400003228,PGSC0003DMT400003784,PGSC0003DMT400004063,PGSC0003DMT400005512,PGSC0003DMT400005532,PGSC0003DMT400005547,PGSC0003DMT400005549,PGSC0003DMT400005557,PGSC0003DMT400005558,PGSC0003DMT400005561,PGSC0003DMT400005571,PGSC0003DMT400005836,PGSC0003DMT400006170,PGSC0003DMT400007511,PGSC0003DMT400008560,PGSC0003DMT400009439,PGSC0003DMT400010296,…	BP	6.1e-07	7.54474e-06	87	640
GO:0006464	cellular protein modification process	PGSC0003DMT400000192,PGSC0003DMT400002312,PGSC0003DMT400005512,PGSC0003DMT400008560,PGSC0003DMT400009802,PGSC0003DMT400010881,PGSC0003DMT400010985,PGSC0003DMT400012001,PGSC0003DMT400014493,PGSC0003DMT400014816,PGSC0003DMT400015306,PGSC0003DMT400015825,PGSC0003DMT400016998,PGSC0003DMT400017833,PGSC0003DMT400019785,PGSC0003DMT400021388,PGSC0003DMT400021389,PGSC0003DMT400021390,PGSC0003DMT400021391,…	BP	1.2e-06	1.37561e-05	85	630
GO:0036211	protein modification process	PGSC0003DMT400000192,PGSC0003DMT400002312,PGSC0003DMT400005512,PGSC0003DMT400008560,PGSC0003DMT400009802,PGSC0003DMT400010881,PGSC0003DMT400010985,PGSC0003DMT400012001,PGSC0003DMT400014493,PGSC0003DMT400014816,PGSC0003DMT400015306,PGSC0003DMT400015825,PGSC0003DMT400016998,PGSC0003DMT400017833,PGSC0003DMT400019785,PGSC0003DMT400021388,PGSC0003DMT400021389,PGSC0003DMT400021390,PGSC0003DMT400021391,…	BP	1.2e-06	1.37561e-05	85	630
GO:0006950	response to stress	PGSC0003DMT400000192,PGSC0003DMT400000985,PGSC0003DMT400001350,PGSC0003DMT400001354,PGSC0003DMT400002019,PGSC0003DMT400003796,PGSC0003DMT400004046,PGSC0003DMT400004695,PGSC0003DMT400005086,PGSC0003DMT400005546,PGSC0003DMT400005836,PGSC0003DMT400006229,PGSC0003DMT400008264,PGSC0003DMT400009064,PGSC0003DMT400010890,PGSC0003DMT400010891,PGSC0003DMT400011236,PGSC0003DMT400011261,PGSC0003DMT400011627,…	BP	1.3e-06	1.38864e-05	131	1096
GO:0009644	response to high light intensity	PGSC0003DMT400008264,PGSC0003DMT400018728,PGSC0003DMT400020425,PGSC0003DMT400022039,PGSC0003DMT400042742,PGSC0003DMT400066554,PGSC0003DMT400083158,PGSC0003DMT400086140	BP	1.6e-06	1.63478e-05	8	13
GO:0009719	response to endogenous stimulus	PGSC0003DMT400000365,PGSC0003DMT400001350,PGSC0003DMT400001354,PGSC0003DMT400002375,PGSC0003DMT400003228,PGSC0003DMT400003784,PGSC0003DMT400004063,PGSC0003DMT400005512,PGSC0003DMT400005532,PGSC0003DMT400005547,PGSC0003DMT400005549,PGSC0003DMT400005557,PGSC0003DMT400005558,PGSC0003DMT400005561,PGSC0003DMT400005571,PGSC0003DMT400005836,PGSC0003DMT400006170,PGSC0003DMT400007511,PGSC0003DMT400008560,…	BP	1.9e-06	1.82245e-05	102	806
GO:0009725	response to hormone	PGSC0003DMT400000365,PGSC0003DMT400001350,PGSC0003DMT400001354,PGSC0003DMT400002375,PGSC0003DMT400003228,PGSC0003DMT400003784,PGSC0003DMT400004063,PGSC0003DMT400005512,PGSC0003DMT400005532,PGSC0003DMT400005547,PGSC0003DMT400005549,PGSC0003DMT400005557,PGSC0003DMT400005558,PGSC0003DMT400005561,PGSC0003DMT400005571,PGSC0003DMT400005836,PGSC0003DMT400006170,PGSC0003DMT400007511,PGSC0003DMT400008560,…	BP	1.9e-06	1.82245e-05	101	796
GO:0043412	macromolecule modification	PGSC0003DMT400000192,PGSC0003DMT400001746,PGSC0003DMT400002312,PGSC0003DMT400005512,PGSC0003DMT400008560,PGSC0003DMT400009802,PGSC0003DMT400010881,PGSC0003DMT400010985,PGSC0003DMT400011022,PGSC0003DMT400012001,PGSC0003DMT400014493,PGSC0003DMT400014816,PGSC0003DMT400015306,PGSC0003DMT400015825,PGSC0003DMT400016998,PGSC0003DMT400017833,PGSC0003DMT400019785,PGSC0003DMT400021388,PGSC0003DMT400021389,…	BP	2.2e-06	1.98846e-05	89	679
GO:0019253	reductive pentose-phosphate cycle	PGSC0003DMT400011335,PGSC0003DMT400018798,PGSC0003DMT400023336,PGSC0003DMT400024090,PGSC0003DMT400025712,PGSC0003DMT400025881,PGSC0003DMT400032975,PGSC0003DMT400050381,PGSC0003DMT400052463,PGSC0003DMT400062138,PGSC0003DMT400069750	BP	2.3e-06	1.96545e-05	11	26
GO:0019685	photosynthesis, dark reaction	PGSC0003DMT400011335,PGSC0003DMT400018798,PGSC0003DMT400023336,PGSC0003DMT400024090,PGSC0003DMT400025712,PGSC0003DMT400025881,PGSC0003DMT400032975,PGSC0003DMT400050381,PGSC0003DMT400052463,PGSC0003DMT400062138,PGSC0003DMT400069750	BP	2.3e-06	1.96545e-05	11	26
GO:0071478	cellular response to radiation	PGSC0003DMT400003078,PGSC0003DMT400015828,PGSC0003DMT400023432,PGSC0003DMT400033827,PGSC0003DMT400034706,PGSC0003DMT400036075,PGSC0003DMT400042742,PGSC0003DMT400047079,PGSC0003DMT400048756,PGSC0003DMT400058735,PGSC0003DMT400065483,PGSC0003DMT400066554,PGSC0003DMT400066807,PGSC0003DMT400067540,PGSC0003DMT400069555,PGSC0003DMT400078745,PGSC0003DMT400079883	BP	4.1e-06	3.32241e-05	17	61
GO:1901700	response to oxygen-containing compound	PGSC0003DMT400000192,PGSC0003DMT400000985,PGSC0003DMT400001350,PGSC0003DMT400001354,PGSC0003DMT400003796,PGSC0003DMT400004695,PGSC0003DMT400005512,PGSC0003DMT400008264,PGSC0003DMT400008560,PGSC0003DMT400008586,PGSC0003DMT400011627,PGSC0003DMT400011661,PGSC0003DMT400011693,PGSC0003DMT400014350,PGSC0003DMT400015306,PGSC0003DMT400015828,PGSC0003DMT400016998,PGSC0003DMT400017167,PGSC0003DMT400018643,…	BP	5.7e-06	4.465e-05	68	490
GO:0071214	cellular response to abiotic stimulus	PGSC0003DMT400003078,PGSC0003DMT400015828,PGSC0003DMT400023432,PGSC0003DMT400033827,PGSC0003DMT400034706,PGSC0003DMT400036075,PGSC0003DMT400042742,PGSC0003DMT400047079,PGSC0003DMT400048756,PGSC0003DMT400049494,PGSC0003DMT400058735,PGSC0003DMT400061942,PGSC0003DMT400065483,PGSC0003DMT400066554,PGSC0003DMT400066807,PGSC0003DMT400067540,PGSC0003DMT400069555,PGSC0003DMT400078673,PGSC0003DMT400078745,…	BP	1e-05	7.34375e-05	20	85
GO:0104004	cellular response to environmental stimulus	PGSC0003DMT400003078,PGSC0003DMT400015828,PGSC0003DMT400023432,PGSC0003DMT400033827,PGSC0003DMT400034706,PGSC0003DMT400036075,PGSC0003DMT400042742,PGSC0003DMT400047079,PGSC0003DMT400048756,PGSC0003DMT400049494,PGSC0003DMT400058735,PGSC0003DMT400061942,PGSC0003DMT400065483,PGSC0003DMT400066554,PGSC0003DMT400066807,PGSC0003DMT400067540,PGSC0003DMT400069555,PGSC0003DMT400078673,PGSC0003DMT400078745,…	BP	1e-05	7.34375e-05	20	85
GO:0009409	response to cold	PGSC0003DMT400003796,PGSC0003DMT400008264,PGSC0003DMT400011979,PGSC0003DMT400018643,PGSC0003DMT400018728,PGSC0003DMT400018798,PGSC0003DMT400020425,PGSC0003DMT400021498,PGSC0003DMT400023336,PGSC0003DMT400025712,PGSC0003DMT400027119,PGSC0003DMT400028622,PGSC0003DMT400036349,PGSC0003DMT400044163,PGSC0003DMT400044362,PGSC0003DMT400049600,PGSC0003DMT400065899,PGSC0003DMT400067321,PGSC0003DMT400067485,…	BP	1e-05	7.34375e-05	21	92
GO:0009266	response to temperature stimulus	PGSC0003DMT400003796,PGSC0003DMT400008264,PGSC0003DMT400011979,PGSC0003DMT400018643,PGSC0003DMT400018728,PGSC0003DMT400018798,PGSC0003DMT400020425,PGSC0003DMT400021498,PGSC0003DMT400023336,PGSC0003DMT400025712,PGSC0003DMT400027119,PGSC0003DMT400028622,PGSC0003DMT400033475,PGSC0003DMT400036349,PGSC0003DMT400044163,PGSC0003DMT400044362,PGSC0003DMT400049600,PGSC0003DMT400051809,PGSC0003DMT400055930,…	BP	1.1e-05	7.60294e-05	26	129
GO:0071482	cellular response to light stimulus	PGSC0003DMT400003078,PGSC0003DMT400015828,PGSC0003DMT400023432,PGSC0003DMT400033827,PGSC0003DMT400034706,PGSC0003DMT400036075,PGSC0003DMT400042742,PGSC0003DMT400047079,PGSC0003DMT400048756,PGSC0003DMT400058735,PGSC0003DMT400065483,PGSC0003DMT400066554,PGSC0003DMT400066807,PGSC0003DMT400067540,PGSC0003DMT400069555,PGSC0003DMT400079883	BP	1.5e-05	0.000100714	16	60
GO:0015977	carbon fixation	PGSC0003DMT400011335,PGSC0003DMT400018798,PGSC0003DMT400023336,PGSC0003DMT400024090,PGSC0003DMT400025712,PGSC0003DMT400025881,PGSC0003DMT400032975,PGSC0003DMT400050381,PGSC0003DMT400052463,PGSC0003DMT400062138,PGSC0003DMT400069750	BP	1.7e-05	0.000109452	11	31
GO:0050789	regulation of biological process	PGSC0003DMT400000192,PGSC0003DMT400000365,PGSC0003DMT400000547,PGSC0003DMT400000985,PGSC0003DMT400002375,PGSC0003DMT400003078,PGSC0003DMT400003228,PGSC0003DMT400003784,PGSC0003DMT400003796,PGSC0003DMT400004063,PGSC0003DMT400005512,PGSC0003DMT400005532,PGSC0003DMT400005547,PGSC0003DMT400005549,PGSC0003DMT400005557,PGSC0003DMT400005558,PGSC0003DMT400005561,PGSC0003DMT400005571,PGSC0003DMT400005759,…	BP	1.7e-05	0.000109452	150	1356
GO:0009642	response to light intensity	PGSC0003DMT400008264,PGSC0003DMT400018728,PGSC0003DMT400020425,PGSC0003DMT400022039,PGSC0003DMT400023459,PGSC0003DMT400042742,PGSC0003DMT400064369,PGSC0003DMT400065527,PGSC0003DMT400066554,PGSC0003DMT400067858,PGSC0003DMT400083158,PGSC0003DMT400086140	BP	2e-05	0.000123684	12	37
GO:0044260	cellular macromolecule metabolic process	PGSC0003DMT400000192,PGSC0003DMT400000946,PGSC0003DMT400002312,PGSC0003DMT400003796,PGSC0003DMT400004200,PGSC0003DMT400005512,PGSC0003DMT400007325,PGSC0003DMT400008560,PGSC0003DMT400009802,PGSC0003DMT400010431,PGSC0003DMT400010881,PGSC0003DMT400010985,PGSC0003DMT400011022,PGSC0003DMT400011562,PGSC0003DMT400011661,PGSC0003DMT400012001,PGSC0003DMT400014350,PGSC0003DMT400014493,PGSC0003DMT400014816,…	BP	3.8e-05	0.000228974	144	1311
GO:0001101	response to acid chemical	PGSC0003DMT400000985,PGSC0003DMT400001350,PGSC0003DMT400001354,PGSC0003DMT400003796,PGSC0003DMT400005512,PGSC0003DMT400008264,PGSC0003DMT400008560,PGSC0003DMT400008586,PGSC0003DMT400011627,PGSC0003DMT400011661,PGSC0003DMT400011693,PGSC0003DMT400014350,PGSC0003DMT400015306,PGSC0003DMT400015828,PGSC0003DMT400016998,PGSC0003DMT400018643,PGSC0003DMT400020425,PGSC0003DMT400020600,PGSC0003DMT400020670,…	BP	5.4e-05	0.00031725	56	408
GO:0006979	response to oxidative stress	PGSC0003DMT400001350,PGSC0003DMT400001354,PGSC0003DMT400008264,PGSC0003DMT400018250,PGSC0003DMT400018728,PGSC0003DMT400020425,PGSC0003DMT400054443,PGSC0003DMT400059054,PGSC0003DMT400060463,PGSC0003DMT400060736,PGSC0003DMT400063510,PGSC0003DMT400065548,PGSC0003DMT400068883,PGSC0003DMT400078745	BP	5.6e-05	0.000320976	14	53
GO:1901000	regulation of response to salt stress	PGSC0003DMT400000985,PGSC0003DMT400003796,PGSC0003DMT400008264,PGSC0003DMT400020425,PGSC0003DMT400023459,PGSC0003DMT400037472,PGSC0003DMT400060403,PGSC0003DMT400064306,PGSC0003DMT400069921,PGSC0003DMT400097756	BP	7.7e-05	0.000430833	10	30
GO:0009639	response to red or far red light	PGSC0003DMT400003078,PGSC0003DMT400008044,PGSC0003DMT400009328,PGSC0003DMT400022039,PGSC0003DMT400034706,PGSC0003DMT400036075,PGSC0003DMT400044562,PGSC0003DMT400047079,PGSC0003DMT400048756,PGSC0003DMT400058735,PGSC0003DMT400064369,PGSC0003DMT400066807,PGSC0003DMT400067540,PGSC0003DMT400079856	BP	0.00011	0.000594253	14	56
GO:0019538	protein metabolic process	PGSC0003DMT400000192,PGSC0003DMT400000946,PGSC0003DMT400002312,PGSC0003DMT400004200,PGSC0003DMT400004400,PGSC0003DMT400005512,PGSC0003DMT400007325,PGSC0003DMT400008560,PGSC0003DMT400009802,PGSC0003DMT400010431,PGSC0003DMT400010881,PGSC0003DMT400010985,PGSC0003DMT400011562,PGSC0003DMT400011661,PGSC0003DMT400012001,PGSC0003DMT400012257,PGSC0003DMT400014351,PGSC0003DMT400014352,PGSC0003DMT400014493,…	BP	0.00011	0.000594253	129	1176
GO:0071229	cellular response to acid chemical	PGSC0003DMT400001350,PGSC0003DMT400001354,PGSC0003DMT400005512,PGSC0003DMT400008560,PGSC0003DMT400011627,PGSC0003DMT400011661,PGSC0003DMT400015306,PGSC0003DMT400015828,PGSC0003DMT400016998,PGSC0003DMT400018643,PGSC0003DMT400020600,PGSC0003DMT400020670,PGSC0003DMT400021210,PGSC0003DMT400023459,PGSC0003DMT400024632,PGSC0003DMT400028061,PGSC0003DMT400028812,PGSC0003DMT400033827,PGSC0003DMT400034618,…	BP	0.00013	0.000678889	38	252
GO:0009733	response to auxin	PGSC0003DMT400000365,PGSC0003DMT400003228,PGSC0003DMT400003784,PGSC0003DMT400004063,PGSC0003DMT400005532,PGSC0003DMT400005547,PGSC0003DMT400005549,PGSC0003DMT400005557,PGSC0003DMT400005558,PGSC0003DMT400005561,PGSC0003DMT400005571,PGSC0003DMT400009439,PGSC0003DMT400011661,PGSC0003DMT400015610,PGSC0003DMT400015825,PGSC0003DMT400020098,PGSC0003DMT400023971,PGSC0003DMT400028619,PGSC0003DMT400031965,…	BP	0.00014	0.000707527	40	271
GO:0047484	regulation of response to osmotic stress	PGSC0003DMT400000985,PGSC0003DMT400003796,PGSC0003DMT400008264,PGSC0003DMT400020425,PGSC0003DMT400023459,PGSC0003DMT400037472,PGSC0003DMT400060403,PGSC0003DMT400064306,PGSC0003DMT400069921,PGSC0003DMT400097756	BP	0.00014	0.000707527	10	32
GO:0009737	response to abscisic acid	PGSC0003DMT400001350,PGSC0003DMT400001354,PGSC0003DMT400005512,PGSC0003DMT400011627,PGSC0003DMT400011661,PGSC0003DMT400015306,PGSC0003DMT400016998,PGSC0003DMT400018643,PGSC0003DMT400020670,PGSC0003DMT400021210,PGSC0003DMT400023459,PGSC0003DMT400028622,PGSC0003DMT400028812,PGSC0003DMT400033827,PGSC0003DMT400034618,PGSC0003DMT400036094,PGSC0003DMT400037119,PGSC0003DMT400037120,PGSC0003DMT400037121,…	BP	0.00025	0.00122396	33	215
GO:0048583	regulation of response to stimulus	PGSC0003DMT400000985,PGSC0003DMT400003796,PGSC0003DMT400008044,PGSC0003DMT400008264,PGSC0003DMT400009328,PGSC0003DMT400011627,PGSC0003DMT400020425,PGSC0003DMT400022039,PGSC0003DMT400023459,PGSC0003DMT400023971,PGSC0003DMT400024632,PGSC0003DMT400026093,PGSC0003DMT400028061,PGSC0003DMT400028812,PGSC0003DMT400033827,PGSC0003DMT400034618,PGSC0003DMT400037472,PGSC0003DMT400039303,PGSC0003DMT400040064,…	BP	0.00027	0.0012949	35	234
GO:0009734	auxin-activated signaling pathway	PGSC0003DMT400000365,PGSC0003DMT400003228,PGSC0003DMT400003784,PGSC0003DMT400004063,PGSC0003DMT400005532,PGSC0003DMT400005547,PGSC0003DMT400005549,PGSC0003DMT400005557,PGSC0003DMT400005558,PGSC0003DMT400005561,PGSC0003DMT400005571,PGSC0003DMT400009439,PGSC0003DMT400015610,PGSC0003DMT400015825,PGSC0003DMT400020098,PGSC0003DMT400023971,PGSC0003DMT400028619,PGSC0003DMT400031965,PGSC0003DMT400034486,…	BP	0.00029	0.001363	37	253
GO:0071365	cellular response to auxin stimulus	PGSC0003DMT400000365,PGSC0003DMT400003228,PGSC0003DMT400003784,PGSC0003DMT400004063,PGSC0003DMT400005532,PGSC0003DMT400005547,PGSC0003DMT400005549,PGSC0003DMT400005557,PGSC0003DMT400005558,PGSC0003DMT400005561,PGSC0003DMT400005571,PGSC0003DMT400009439,PGSC0003DMT400015610,PGSC0003DMT400015825,PGSC0003DMT400020098,PGSC0003DMT400023971,PGSC0003DMT400028619,PGSC0003DMT400031965,PGSC0003DMT400034486,…	BP	0.00034	0.00156667	37	255
GO:0006413	translational initiation	PGSC0003DMT400004200,PGSC0003DMT400007325,PGSC0003DMT400011661,PGSC0003DMT400019783,PGSC0003DMT400019914,PGSC0003DMT400034911,PGSC0003DMT400043056,PGSC0003DMT400049575,PGSC0003DMT400060836,PGSC0003DMT400063132,PGSC0003DMT400076704,PGSC0003DMT400078293	BP	0.0005	0.00225962	12	50
GO:0065007	biological regulation	PGSC0003DMT400000192,PGSC0003DMT400000365,PGSC0003DMT400000547,PGSC0003DMT400000553,PGSC0003DMT400000985,PGSC0003DMT400002375,PGSC0003DMT400003078,PGSC0003DMT400003228,PGSC0003DMT400003784,PGSC0003DMT400003796,PGSC0003DMT400004063,PGSC0003DMT400005512,PGSC0003DMT400005532,PGSC0003DMT400005547,PGSC0003DMT400005549,PGSC0003DMT400005557,PGSC0003DMT400005558,PGSC0003DMT400005561,PGSC0003DMT400005571,…	BP	0.00051	0.00226132	160	1563
GO:0018344	protein geranylgeranylation	PGSC0003DMT400014493,PGSC0003DMT400069166,PGSC0003DMT400069476	BP	0.00053	0.00224414	3	3
GO:0036294	cellular response to decreased oxygen levels	PGSC0003DMT400018798,PGSC0003DMT400023336,PGSC0003DMT400025712	BP	0.00053	0.00224414	3	3
GO:0071453	cellular response to oxygen levels	PGSC0003DMT400018798,PGSC0003DMT400023336,PGSC0003DMT400025712	BP	0.00053	0.00224414	3	3
GO:0071454	cellular response to anoxia	PGSC0003DMT400018798,PGSC0003DMT400023336,PGSC0003DMT400025712	BP	0.00053	0.00224414	3	3
GO:0043170	macromolecule metabolic process	PGSC0003DMT400000192,PGSC0003DMT400000568,PGSC0003DMT400000917,PGSC0003DMT400000946,PGSC0003DMT400001746,PGSC0003DMT400001821,PGSC0003DMT400002312,PGSC0003DMT400003537,PGSC0003DMT400003796,PGSC0003DMT400004200,PGSC0003DMT400004400,PGSC0003DMT400005512,PGSC0003DMT400007325,PGSC0003DMT400008560,PGSC0003DMT400009802,PGSC0003DMT400010431,PGSC0003DMT400010881,PGSC0003DMT400010908,PGSC0003DMT400010985,…	BP	0.00056	0.00226897	206	2092
GO:0048511	rhythmic process	PGSC0003DMT400003078,PGSC0003DMT400004130,PGSC0003DMT400022039,PGSC0003DMT400022987,PGSC0003DMT400028711,PGSC0003DMT400029402,PGSC0003DMT400032715,PGSC0003DMT400033560,PGSC0003DMT400051416,PGSC0003DMT400065850,PGSC0003DMT400090250	BP	0.00058	0.00231017	11	44
GO:0009738	abscisic acid-activated signaling pathway	PGSC0003DMT400005512,PGSC0003DMT400011627,PGSC0003DMT400011661,PGSC0003DMT400015306,PGSC0003DMT400016998,PGSC0003DMT400018643,PGSC0003DMT400020670,PGSC0003DMT400021210,PGSC0003DMT400023459,PGSC0003DMT400028812,PGSC0003DMT400033827,PGSC0003DMT400034618,PGSC0003DMT400036094,PGSC0003DMT400037119,PGSC0003DMT400037120,PGSC0003DMT400037121,PGSC0003DMT400037472,PGSC0003DMT400055257,PGSC0003DMT400060263,…	BP	0.00065	0.00254583	25	155
GO:0097305	response to alcohol	PGSC0003DMT400001350,PGSC0003DMT400001354,PGSC0003DMT400005512,PGSC0003DMT400011627,PGSC0003DMT400011661,PGSC0003DMT400015306,PGSC0003DMT400016998,PGSC0003DMT400018643,PGSC0003DMT400020670,PGSC0003DMT400021210,PGSC0003DMT400023459,PGSC0003DMT400028622,PGSC0003DMT400028812,PGSC0003DMT400033827,PGSC0003DMT400034618,PGSC0003DMT400036094,PGSC0003DMT400037119,PGSC0003DMT400037120,PGSC0003DMT400037121,…	BP	0.00067	0.00258115	33	227
GO:0042440	pigment metabolic process	PGSC0003DMT400002866,PGSC0003DMT400008034,PGSC0003DMT400009287,PGSC0003DMT400016512,PGSC0003DMT400022039,PGSC0003DMT400029316,PGSC0003DMT400036942,PGSC0003DMT400040485,PGSC0003DMT400050234,PGSC0003DMT400061846,PGSC0003DMT400062562,PGSC0003DMT400064369,PGSC0003DMT400065548,PGSC0003DMT400069485,PGSC0003DMT400070176,PGSC0003DMT400071048,PGSC0003DMT400072543,PGSC0003DMT400074346	BP	0.00069	0.00261532	18	97
GO:1901701	cellular response to oxygen-containing compound	PGSC0003DMT400000192,PGSC0003DMT400001350,PGSC0003DMT400001354,PGSC0003DMT400005512,PGSC0003DMT400008560,PGSC0003DMT400011627,PGSC0003DMT400011661,PGSC0003DMT400015306,PGSC0003DMT400015828,PGSC0003DMT400016998,PGSC0003DMT400018643,PGSC0003DMT400020600,PGSC0003DMT400020670,PGSC0003DMT400021210,PGSC0003DMT400023459,PGSC0003DMT400024632,PGSC0003DMT400026093,PGSC0003DMT400028061,PGSC0003DMT400028622,…	BP	0.00072	0.00264375	41	303
GO:0009966	regulation of signal transduction	PGSC0003DMT400011627,PGSC0003DMT400023459,PGSC0003DMT400023971,PGSC0003DMT400024632,PGSC0003DMT400026093,PGSC0003DMT400028812,PGSC0003DMT400033827,PGSC0003DMT400034618,PGSC0003DMT400037472,PGSC0003DMT400039303,PGSC0003DMT400040064,PGSC0003DMT400047079,PGSC0003DMT400048756,PGSC0003DMT400060403,PGSC0003DMT400064306,PGSC0003DMT400069921,PGSC0003DMT400075895,PGSC0003DMT400075899,PGSC0003DMT400076840,…	BP	0.00072	0.00264375	21	122
GO:0023051	regulation of signaling	PGSC0003DMT400011627,PGSC0003DMT400023459,PGSC0003DMT400023971,PGSC0003DMT400024632,PGSC0003DMT400026093,PGSC0003DMT400028812,PGSC0003DMT400033827,PGSC0003DMT400034618,PGSC0003DMT400037472,PGSC0003DMT400039303,PGSC0003DMT400040064,PGSC0003DMT400047079,PGSC0003DMT400048756,PGSC0003DMT400060403,PGSC0003DMT400064306,PGSC0003DMT400069921,PGSC0003DMT400075895,PGSC0003DMT400075899,PGSC0003DMT400076840,…	BP	0.00072	0.00264375	21	122
GO:0010035	response to inorganic substance	PGSC0003DMT400000192,PGSC0003DMT400000985,PGSC0003DMT400001350,PGSC0003DMT400001354,PGSC0003DMT400003796,PGSC0003DMT400008264,PGSC0003DMT400011627,PGSC0003DMT400011693,PGSC0003DMT400015828,PGSC0003DMT400020425,PGSC0003DMT400021498,PGSC0003DMT400023459,PGSC0003DMT400036349,PGSC0003DMT400044362,PGSC0003DMT400047537,PGSC0003DMT400049494,PGSC0003DMT400054443,PGSC0003DMT400059054,PGSC0003DMT400060403,…	BP	0.00079	0.00281288	25	157
GO:0009987	cellular process	PGSC0003DMT400000186,PGSC0003DMT400000192,PGSC0003DMT400000365,PGSC0003DMT400000447,PGSC0003DMT400000547,PGSC0003DMT400000553,PGSC0003DMT400000568,PGSC0003DMT400000747,PGSC0003DMT400000917,PGSC0003DMT400000946,PGSC0003DMT400001350,PGSC0003DMT400001354,PGSC0003DMT400001417,PGSC0003DMT400001709,PGSC0003DMT400001746,PGSC0003DMT400001821,PGSC0003DMT400002312,PGSC0003DMT400002341,PGSC0003DMT400002375,…	BP	0.00081	0.00282	489	5562
GO:0010646	regulation of cell communication	PGSC0003DMT400011627,PGSC0003DMT400023459,PGSC0003DMT400023971,PGSC0003DMT400024632,PGSC0003DMT400026093,PGSC0003DMT400028812,PGSC0003DMT400033827,PGSC0003DMT400034618,PGSC0003DMT400037472,PGSC0003DMT400039303,PGSC0003DMT400040064,PGSC0003DMT400047079,PGSC0003DMT400048756,PGSC0003DMT400060403,PGSC0003DMT400064306,PGSC0003DMT400069921,PGSC0003DMT400075895,PGSC0003DMT400075899,PGSC0003DMT400076840,…	BP	0.00081	0.00282	21	123
GO:0033993	response to lipid	PGSC0003DMT400001350,PGSC0003DMT400001354,PGSC0003DMT400005512,PGSC0003DMT400008560,PGSC0003DMT400011627,PGSC0003DMT400011661,PGSC0003DMT400014350,PGSC0003DMT400015306,PGSC0003DMT400016998,PGSC0003DMT400018643,PGSC0003DMT400020670,PGSC0003DMT400021210,PGSC0003DMT400022039,PGSC0003DMT400023459,PGSC0003DMT400028622,PGSC0003DMT400028812,PGSC0003DMT400033827,PGSC0003DMT400034618,PGSC0003DMT400036094,…	BP	0.00085	0.00289493	40	296
GO:0071215	cellular response to abscisic acid stimulus	PGSC0003DMT400005512,PGSC0003DMT400011627,PGSC0003DMT400011661,PGSC0003DMT400015306,PGSC0003DMT400016998,PGSC0003DMT400018643,PGSC0003DMT400020670,PGSC0003DMT400021210,PGSC0003DMT400023459,PGSC0003DMT400028812,PGSC0003DMT400033827,PGSC0003DMT400034618,PGSC0003DMT400036094,PGSC0003DMT400037119,PGSC0003DMT400037120,PGSC0003DMT400037121,PGSC0003DMT400037472,PGSC0003DMT400043501,PGSC0003DMT400055257,…	BP	0.00088	0.00293333	26	167
GO:0097306	cellular response to alcohol	PGSC0003DMT400005512,PGSC0003DMT400011627,PGSC0003DMT400011661,PGSC0003DMT400015306,PGSC0003DMT400016998,PGSC0003DMT400018643,PGSC0003DMT400020670,PGSC0003DMT400021210,PGSC0003DMT400023459,PGSC0003DMT400028812,PGSC0003DMT400033827,PGSC0003DMT400034618,PGSC0003DMT400036094,PGSC0003DMT400037119,PGSC0003DMT400037120,PGSC0003DMT400037121,PGSC0003DMT400037472,PGSC0003DMT400043501,PGSC0003DMT400055257,…	BP	0.00088	0.00293333	26	167
GO:0009651	response to salt stress	PGSC0003DMT400000985,PGSC0003DMT400003796,PGSC0003DMT400008264,PGSC0003DMT400018643,PGSC0003DMT400020425,PGSC0003DMT400021498,PGSC0003DMT400023459,PGSC0003DMT400028622,PGSC0003DMT400036349,PGSC0003DMT400037472,PGSC0003DMT400043270,PGSC0003DMT400044362,PGSC0003DMT400060403,PGSC0003DMT400063510,PGSC0003DMT400064306,PGSC0003DMT400065899,PGSC0003DMT400069921,PGSC0003DMT400071048,PGSC0003DMT400097756	BP	0.00097	0.00316597	19	108
GO:0048585	negative regulation of response to stimulus	PGSC0003DMT400008044,PGSC0003DMT400009328,PGSC0003DMT400011627,PGSC0003DMT400023459,PGSC0003DMT400023971,PGSC0003DMT400028061,PGSC0003DMT400033827,PGSC0003DMT400047079,PGSC0003DMT400048756,PGSC0003DMT400060403,PGSC0003DMT400064306,PGSC0003DMT400069921,PGSC0003DMT400075895,PGSC0003DMT400075899,PGSC0003DMT400076840,PGSC0003DMT400076977,PGSC0003DMT400079501,PGSC0003DMT400097756	BP	0.001	0.00319728	18	100
GO:0046148	pigment biosynthetic process	PGSC0003DMT400002866,PGSC0003DMT400008034,PGSC0003DMT400009287,PGSC0003DMT400016512,PGSC0003DMT400029316,PGSC0003DMT400036942,PGSC0003DMT400040485,PGSC0003DMT400050234,PGSC0003DMT400061846,PGSC0003DMT400062562,PGSC0003DMT400064369,PGSC0003DMT400069485,PGSC0003DMT400070176,PGSC0003DMT400071048,PGSC0003DMT400072543,PGSC0003DMT400074346	BP	0.001	0.00319728	16	84
GO:0009414	response to water deprivation	PGSC0003DMT400000985,PGSC0003DMT400003796,PGSC0003DMT400008264,PGSC0003DMT400011627,PGSC0003DMT400015828,PGSC0003DMT400020425,PGSC0003DMT400021498,PGSC0003DMT400023459,PGSC0003DMT400036349,PGSC0003DMT400044362,PGSC0003DMT400047537,PGSC0003DMT400049494,PGSC0003DMT400060403,PGSC0003DMT400061942,PGSC0003DMT400063510,PGSC0003DMT400065899,PGSC0003DMT400071048	BP	0.00101	0.00316467	17	92
GO:0044238	primary metabolic process	PGSC0003DMT400000192,PGSC0003DMT400000568,PGSC0003DMT400000747,PGSC0003DMT400000917,PGSC0003DMT400000946,PGSC0003DMT400001350,PGSC0003DMT400001354,PGSC0003DMT400001709,PGSC0003DMT400001746,PGSC0003DMT400001821,PGSC0003DMT400002019,PGSC0003DMT400002312,PGSC0003DMT400002555,PGSC0003DMT400002558,PGSC0003DMT400003537,PGSC0003DMT400003796,PGSC0003DMT400004200,PGSC0003DMT400004400,PGSC0003DMT400005512,…	BP	0.00107	0.00330855	318	3446
GO:0009415	response to water	PGSC0003DMT400000985,PGSC0003DMT400003796,PGSC0003DMT400008264,PGSC0003DMT400011627,PGSC0003DMT400015828,PGSC0003DMT400020425,PGSC0003DMT400021498,PGSC0003DMT400023459,PGSC0003DMT400036349,PGSC0003DMT400044362,PGSC0003DMT400047537,PGSC0003DMT400049494,PGSC0003DMT400060403,PGSC0003DMT400061942,PGSC0003DMT400063510,PGSC0003DMT400065899,PGSC0003DMT400071048	BP	0.00164	0.00500519	17	96
GO:0006633	fatty acid biosynthetic process	PGSC0003DMT400001350,PGSC0003DMT400001354,PGSC0003DMT400001709,PGSC0003DMT400002555,PGSC0003DMT400007615,PGSC0003DMT400009451,PGSC0003DMT400011861,PGSC0003DMT400014133,PGSC0003DMT400014713,PGSC0003DMT400015633,PGSC0003DMT400028158,PGSC0003DMT400032993,PGSC0003DMT400043501,PGSC0003DMT400048344,PGSC0003DMT400058757,PGSC0003DMT400058933,PGSC0003DMT400061218,PGSC0003DMT400063446,PGSC0003DMT400063477,…	BP	0.00193	0.00581474	24	158
GO:0006883	cellular sodium ion homeostasis	PGSC0003DMT400008264,PGSC0003DMT400020425,PGSC0003DMT400097756	BP	0.00199	0.00584563	3	4
GO:0030004	cellular monovalent inorganic cation homeostasis	PGSC0003DMT400008264,PGSC0003DMT400020425,PGSC0003DMT400097756	BP	0.00199	0.00584563	3	4
GO:0034059	response to anoxia	PGSC0003DMT400018798,PGSC0003DMT400023336,PGSC0003DMT400025712	BP	0.00199	0.00584563	3	4
GO:0015995	chlorophyll biosynthetic process	PGSC0003DMT400002866,PGSC0003DMT400008034,PGSC0003DMT400029316,PGSC0003DMT400036942,PGSC0003DMT400050234,PGSC0003DMT400064369,PGSC0003DMT400069485,PGSC0003DMT400070176	BP	0.00209	0.00598963	8	30
GO:0022618	ribonucleoprotein complex assembly	PGSC0003DMT400004200,PGSC0003DMT400010431,PGSC0003DMT400011661,PGSC0003DMT400024400,PGSC0003DMT400062828,PGSC0003DMT400069333,PGSC0003DMT400076704	BP	0.00226	0.00636048	7	24
GO:0071826	ribonucleoprotein complex subunit organization	PGSC0003DMT400004200,PGSC0003DMT400010431,PGSC0003DMT400011661,PGSC0003DMT400024400,PGSC0003DMT400062828,PGSC0003DMT400069333,PGSC0003DMT400076704	BP	0.00226	0.00636048	7	24
GO:0006807	nitrogen compound metabolic process	PGSC0003DMT400000192,PGSC0003DMT400000447,PGSC0003DMT400000568,PGSC0003DMT400000917,PGSC0003DMT400000946,PGSC0003DMT400001746,PGSC0003DMT400001821,PGSC0003DMT400002312,PGSC0003DMT400002558,PGSC0003DMT400002866,PGSC0003DMT400003796,PGSC0003DMT400004200,PGSC0003DMT400004400,PGSC0003DMT400005512,PGSC0003DMT400007325,PGSC0003DMT400008034,PGSC0003DMT400008103,PGSC0003DMT400008560,PGSC0003DMT400009551,…	BP	0.00228	0.00630353	240	2547
GO:0008380	RNA splicing	PGSC0003DMT400000568,PGSC0003DMT400000917,PGSC0003DMT400010908,PGSC0003DMT400012169,PGSC0003DMT400014424,PGSC0003DMT400018531,PGSC0003DMT400029666,PGSC0003DMT400033081,PGSC0003DMT400040069,PGSC0003DMT400042233,PGSC0003DMT400043101,PGSC0003DMT400044280,PGSC0003DMT400045694,PGSC0003DMT400046635,PGSC0003DMT400054608,PGSC0003DMT400055636,PGSC0003DMT400060729,PGSC0003DMT400063604,PGSC0003DMT400070583,…	BP	0.00229	0.00625756	23	151
GO:0080090	regulation of primary metabolic process	PGSC0003DMT400003796,PGSC0003DMT400010431,PGSC0003DMT400011562,PGSC0003DMT400011661,PGSC0003DMT400014350,PGSC0003DMT400017833,PGSC0003DMT400018531,PGSC0003DMT400023432,PGSC0003DMT400023459,PGSC0003DMT400024599,PGSC0003DMT400026093,PGSC0003DMT400026257,PGSC0003DMT400028061,PGSC0003DMT400033560,PGSC0003DMT400033827,PGSC0003DMT400034911,PGSC0003DMT400037716,PGSC0003DMT400039743,PGSC0003DMT400047079,…	BP	0.00233	0.00629368	40	312
GO:0051252	regulation of RNA metabolic process	PGSC0003DMT400003796,PGSC0003DMT400014350,PGSC0003DMT400017833,PGSC0003DMT400018531,PGSC0003DMT400023432,PGSC0003DMT400023459,PGSC0003DMT400028061,PGSC0003DMT400033560,PGSC0003DMT400037716,PGSC0003DMT400047079,PGSC0003DMT400048756,PGSC0003DMT400053433,PGSC0003DMT400054608,PGSC0003DMT400058471,PGSC0003DMT400060403,PGSC0003DMT400061942,PGSC0003DMT400064306,PGSC0003DMT400065483,PGSC0003DMT400067321,…	BP	0.00268	0.00715682	25	171
GO:0009408	response to heat	PGSC0003DMT400008264,PGSC0003DMT400018798,PGSC0003DMT400020425,PGSC0003DMT400023336,PGSC0003DMT400025712,PGSC0003DMT400033475,PGSC0003DMT400051809,PGSC0003DMT400055930,PGSC0003DMT400060736,PGSC0003DMT400079969	BP	0.00269	0.00710281	10	45
GO:0044237	cellular metabolic process	PGSC0003DMT400000186,PGSC0003DMT400000192,PGSC0003DMT400000447,PGSC0003DMT400000553,PGSC0003DMT400000568,PGSC0003DMT400000747,PGSC0003DMT400000917,PGSC0003DMT400000946,PGSC0003DMT400001350,PGSC0003DMT400001354,PGSC0003DMT400001417,PGSC0003DMT400001709,PGSC0003DMT400001746,PGSC0003DMT400001821,PGSC0003DMT400002312,PGSC0003DMT400002341,PGSC0003DMT400002555,PGSC0003DMT400002558,PGSC0003DMT400002866,…	BP	0.00289	0.00754611	372	4154
GO:0019684	photosynthesis, light reaction	PGSC0003DMT400001417,PGSC0003DMT400016981,PGSC0003DMT400023432,PGSC0003DMT400058521,PGSC0003DMT400081870,PGSC0003DMT400083158,PGSC0003DMT400095387	BP	0.00293	0.00756648	7	25
GO:0044093	positive regulation of molecular function	PGSC0003DMT400022039,PGSC0003DMT400026093,PGSC0003DMT400033827,PGSC0003DMT400034618,PGSC0003DMT400037472,PGSC0003DMT400059966	BP	0.003	0.00766304	6	19
GO:0006970	response to osmotic stress	PGSC0003DMT400000985,PGSC0003DMT400003796,PGSC0003DMT400008264,PGSC0003DMT400018643,PGSC0003DMT400020425,PGSC0003DMT400021498,PGSC0003DMT400023459,PGSC0003DMT400028622,PGSC0003DMT400036349,PGSC0003DMT400037472,PGSC0003DMT400043270,PGSC0003DMT400044362,PGSC0003DMT400060403,PGSC0003DMT400063510,PGSC0003DMT400064306,PGSC0003DMT400065899,PGSC0003DMT400069921,PGSC0003DMT400071048,PGSC0003DMT400073289,…	BP	0.00323	0.00816183	21	137
GO:0048584	positive regulation of response to stimulus	PGSC0003DMT400000985,PGSC0003DMT400003796,PGSC0003DMT400008264,PGSC0003DMT400020425,PGSC0003DMT400022039,PGSC0003DMT400026093,PGSC0003DMT400028812,PGSC0003DMT400033827,PGSC0003DMT400034618,PGSC0003DMT400037472,PGSC0003DMT400058735,PGSC0003DMT400060330,PGSC0003DMT400064306,PGSC0003DMT400065548,PGSC0003DMT400069921,PGSC0003DMT400078745	BP	0.00337	0.008425	16	94
GO:0006352	DNA-templated transcription, initiation	PGSC0003DMT400023432,PGSC0003DMT400065483,PGSC0003DMT400069555,PGSC0003DMT400079883	BP	0.00386	0.00954842	4	9
GO:0006397	mRNA processing	PGSC0003DMT400000568,PGSC0003DMT400000917,PGSC0003DMT400001821,PGSC0003DMT400010431,PGSC0003DMT400010908,PGSC0003DMT400012169,PGSC0003DMT400012431,PGSC0003DMT400013036,PGSC0003DMT400014424,PGSC0003DMT400015074,PGSC0003DMT400018531,PGSC0003DMT400029379,PGSC0003DMT400029666,PGSC0003DMT400033081,PGSC0003DMT400040069,PGSC0003DMT400042233,PGSC0003DMT400043101,PGSC0003DMT400044280,PGSC0003DMT400045694,…	BP	0.00408	0.0099875	32	243
GO:0071396	cellular response to lipid	PGSC0003DMT400005512,PGSC0003DMT400008560,PGSC0003DMT400011627,PGSC0003DMT400011661,PGSC0003DMT400015306,PGSC0003DMT400016998,PGSC0003DMT400018643,PGSC0003DMT400020670,PGSC0003DMT400021210,PGSC0003DMT400023459,PGSC0003DMT400028622,PGSC0003DMT400028812,PGSC0003DMT400033827,PGSC0003DMT400034618,PGSC0003DMT400036094,PGSC0003DMT400037119,PGSC0003DMT400037120,PGSC0003DMT400037121,PGSC0003DMT400037472,…	BP	0.00426	0.0103206	31	234
GO:0018342	protein prenylation	PGSC0003DMT400014493,PGSC0003DMT400069166,PGSC0003DMT400069476	BP	0.00467	0.0110854	3	5
GO:0097354	prenylation	PGSC0003DMT400014493,PGSC0003DMT400069166,PGSC0003DMT400069476	BP	0.00467	0.0110854	3	5
GO:1905582	response to mannose	PGSC0003DMT400004695,PGSC0003DMT400017167,PGSC0003DMT400068383	BP	0.00467	0.0110854	3	5
GO:0009853	photorespiration	PGSC0003DMT400000447,PGSC0003DMT400011851,PGSC0003DMT400015828,PGSC0003DMT400032975,PGSC0003DMT400050381,PGSC0003DMT400062138,PGSC0003DMT400071115	BP	0.00469	0.0109124	7	27
GO:0006355	regulation of transcription, DNA-templated	PGSC0003DMT400003796,PGSC0003DMT400014350,PGSC0003DMT400017833,PGSC0003DMT400023432,PGSC0003DMT400023459,PGSC0003DMT400028061,PGSC0003DMT400033560,PGSC0003DMT400037716,PGSC0003DMT400047079,PGSC0003DMT400048756,PGSC0003DMT400053433,PGSC0003DMT400058471,PGSC0003DMT400060403,PGSC0003DMT400061942,PGSC0003DMT400064306,PGSC0003DMT400065483,PGSC0003DMT400067321,PGSC0003DMT400069555,PGSC0003DMT400069733,…	BP	0.00482	0.0111049	23	160
GO:2000112	regulation of cellular macromolecule biosynthetic process	PGSC0003DMT400003796,PGSC0003DMT400010431,PGSC0003DMT400011661,PGSC0003DMT400014350,PGSC0003DMT400017833,PGSC0003DMT400023432,PGSC0003DMT400023459,PGSC0003DMT400028061,PGSC0003DMT400033560,PGSC0003DMT400034911,PGSC0003DMT400037716,PGSC0003DMT400047079,PGSC0003DMT400048756,PGSC0003DMT400049575,PGSC0003DMT400053433,PGSC0003DMT400058471,PGSC0003DMT400060403,PGSC0003DMT400060836,PGSC0003DMT400061942,…	BP	0.00505	0.0115218	30	227
GO:0009605	response to external stimulus	PGSC0003DMT400001350,PGSC0003DMT400001354,PGSC0003DMT400003078,PGSC0003DMT400004695,PGSC0003DMT400005086,PGSC0003DMT400010891,PGSC0003DMT400011236,PGSC0003DMT400015828,PGSC0003DMT400017167,PGSC0003DMT400018643,PGSC0003DMT400022039,PGSC0003DMT400022474,PGSC0003DMT400023459,PGSC0003DMT400024632,PGSC0003DMT400026093,PGSC0003DMT400027119,PGSC0003DMT400028061,PGSC0003DMT400030334,PGSC0003DMT400032735,…	BP	0.00507	0.0114562	40	326
GO:0031326	regulation of cellular biosynthetic process	PGSC0003DMT400003796,PGSC0003DMT400010431,PGSC0003DMT400011661,PGSC0003DMT400014350,PGSC0003DMT400017833,PGSC0003DMT400023432,PGSC0003DMT400023459,PGSC0003DMT400028061,PGSC0003DMT400033560,PGSC0003DMT400033827,PGSC0003DMT400034911,PGSC0003DMT400037716,PGSC0003DMT400047079,PGSC0003DMT400048756,PGSC0003DMT400049575,PGSC0003DMT400053433,PGSC0003DMT400058471,PGSC0003DMT400060403,PGSC0003DMT400060836,…	BP	0.00515	0.0115262	31	237
GO:2000030	regulation of response to red or far red light	PGSC0003DMT400008044,PGSC0003DMT400009328,PGSC0003DMT400022039,PGSC0003DMT400047079,PGSC0003DMT400048756	BP	0.0052	0.0115283	5	15
GO:1903506	regulation of nucleic acid-templated transcription	PGSC0003DMT400003796,PGSC0003DMT400014350,PGSC0003DMT400017833,PGSC0003DMT400023432,PGSC0003DMT400023459,PGSC0003DMT400028061,PGSC0003DMT400033560,PGSC0003DMT400037716,PGSC0003DMT400047079,PGSC0003DMT400048756,PGSC0003DMT400053433,PGSC0003DMT400058471,PGSC0003DMT400060403,PGSC0003DMT400061942,PGSC0003DMT400064306,PGSC0003DMT400065483,PGSC0003DMT400067321,PGSC0003DMT400069555,PGSC0003DMT400069733,…	BP	0.00521	0.0113893	23	161
GO:2001141	regulation of RNA biosynthetic process	PGSC0003DMT400003796,PGSC0003DMT400014350,PGSC0003DMT400017833,PGSC0003DMT400023432,PGSC0003DMT400023459,PGSC0003DMT400028061,PGSC0003DMT400033560,PGSC0003DMT400037716,PGSC0003DMT400047079,PGSC0003DMT400048756,PGSC0003DMT400053433,PGSC0003DMT400058471,PGSC0003DMT400060403,PGSC0003DMT400061942,PGSC0003DMT400064306,PGSC0003DMT400065483,PGSC0003DMT400067321,PGSC0003DMT400069555,PGSC0003DMT400069733,…	BP	0.00521	0.0113893	23	161
GO:0051171	regulation of nitrogen compound metabolic process	PGSC0003DMT400003796,PGSC0003DMT400010431,PGSC0003DMT400011562,PGSC0003DMT400011661,PGSC0003DMT400014350,PGSC0003DMT400017833,PGSC0003DMT400018531,PGSC0003DMT400023432,PGSC0003DMT400023459,PGSC0003DMT400024599,PGSC0003DMT400026093,PGSC0003DMT400026257,PGSC0003DMT400028061,PGSC0003DMT400033560,PGSC0003DMT400034911,PGSC0003DMT400037716,PGSC0003DMT400047079,PGSC0003DMT400048756,PGSC0003DMT400049575,…	BP	0.00538	0.0115991	36	287
GO:0034622	cellular protein-containing complex assembly	PGSC0003DMT400001417,PGSC0003DMT400004200,PGSC0003DMT400010431,PGSC0003DMT400011661,PGSC0003DMT400012208,PGSC0003DMT400016981,PGSC0003DMT400023432,PGSC0003DMT400024400,PGSC0003DMT400062828,PGSC0003DMT400069333,PGSC0003DMT400076704,PGSC0003DMT400081870	BP	0.00539	0.011515	12	65
GO:0016070	RNA metabolic process	PGSC0003DMT400000568,PGSC0003DMT400000917,PGSC0003DMT400001746,PGSC0003DMT400001821,PGSC0003DMT400003796,PGSC0003DMT400010431,PGSC0003DMT400010908,PGSC0003DMT400011022,PGSC0003DMT400012169,PGSC0003DMT400012431,PGSC0003DMT400013036,PGSC0003DMT400014350,PGSC0003DMT400014424,PGSC0003DMT400015074,PGSC0003DMT400017833,PGSC0003DMT400018531,PGSC0003DMT400023432,PGSC0003DMT400023459,PGSC0003DMT400028061,…	BP	0.00555	0.01175	63	567
GO:0031407	oxylipin metabolic process	PGSC0003DMT400001350,PGSC0003DMT400001354,PGSC0003DMT400001709,PGSC0003DMT400014713,PGSC0003DMT400028158,PGSC0003DMT400048344,PGSC0003DMT400058933,PGSC0003DMT400063446,PGSC0003DMT400063477	BP	0.00559	0.0116769	9	42
GO:0031408	oxylipin biosynthetic process	PGSC0003DMT400001350,PGSC0003DMT400001354,PGSC0003DMT400001709,PGSC0003DMT400014713,PGSC0003DMT400028158,PGSC0003DMT400048344,PGSC0003DMT400058933,PGSC0003DMT400063446,PGSC0003DMT400063477	BP	0.00559	0.0116769	9	42
GO:0006779	porphyrin-containing compound biosynthetic process	PGSC0003DMT400002866,PGSC0003DMT400008034,PGSC0003DMT400029316,PGSC0003DMT400036942,PGSC0003DMT400050234,PGSC0003DMT400064369,PGSC0003DMT400069485,PGSC0003DMT400070176	BP	0.00587	0.0120476	8	35
GO:0033014	tetrapyrrole biosynthetic process	PGSC0003DMT400002866,PGSC0003DMT400008034,PGSC0003DMT400029316,PGSC0003DMT400036942,PGSC0003DMT400050234,PGSC0003DMT400064369,PGSC0003DMT400069485,PGSC0003DMT400070176	BP	0.00587	0.0120476	8	35
GO:0010467	gene expression	PGSC0003DMT400000568,PGSC0003DMT400000917,PGSC0003DMT400000946,PGSC0003DMT400001746,PGSC0003DMT400001821,PGSC0003DMT400003796,PGSC0003DMT400004200,PGSC0003DMT400007325,PGSC0003DMT400010431,PGSC0003DMT400010908,PGSC0003DMT400011661,PGSC0003DMT400012169,PGSC0003DMT400012431,PGSC0003DMT400013036,PGSC0003DMT400014350,PGSC0003DMT400014424,PGSC0003DMT400015074,PGSC0003DMT400017833,PGSC0003DMT400018531,…	BP	0.00632	0.0128034	81	765
GO:0070647	protein modification by small protein conjugation or removal	PGSC0003DMT400002312,PGSC0003DMT400005512,PGSC0003DMT400008560,PGSC0003DMT400009802,PGSC0003DMT400010881,PGSC0003DMT400014816,PGSC0003DMT400015306,PGSC0003DMT400015825,PGSC0003DMT400016998,PGSC0003DMT400017833,PGSC0003DMT400021649,PGSC0003DMT400022573,PGSC0003DMT400027542,PGSC0003DMT400031245,PGSC0003DMT400032059,PGSC0003DMT400032735,PGSC0003DMT400034706,PGSC0003DMT400036075,PGSC0003DMT400038537,…	BP	0.00672	0.0134974	46	393
GO:0009991	response to extracellular stimulus	PGSC0003DMT400004695,PGSC0003DMT400015828,PGSC0003DMT400017167,PGSC0003DMT400018643,PGSC0003DMT400049494,PGSC0003DMT400054443,PGSC0003DMT400059054,PGSC0003DMT400061942,PGSC0003DMT400064277,PGSC0003DMT400067858,PGSC0003DMT400068383	BP	0.00702	0.0139215	11	59
GO:0065009	regulation of molecular function	PGSC0003DMT400011562,PGSC0003DMT400022039,PGSC0003DMT400024599,PGSC0003DMT400026093,PGSC0003DMT400026257,PGSC0003DMT400033827,PGSC0003DMT400034618,PGSC0003DMT400037472,PGSC0003DMT400039743,PGSC0003DMT400059966,PGSC0003DMT400097756	BP	0.00702	0.0139215	11	59
GO:0009968	negative regulation of signal transduction	PGSC0003DMT400023459,PGSC0003DMT400023971,PGSC0003DMT400033827,PGSC0003DMT400047079,PGSC0003DMT400048756,PGSC0003DMT400075895,PGSC0003DMT400075899,PGSC0003DMT400076840,PGSC0003DMT400076977	BP	0.00769	0.0149351	9	44
GO:0010648	negative regulation of cell communication	PGSC0003DMT400023459,PGSC0003DMT400023971,PGSC0003DMT400033827,PGSC0003DMT400047079,PGSC0003DMT400048756,PGSC0003DMT400075895,PGSC0003DMT400075899,PGSC0003DMT400076840,PGSC0003DMT400076977	BP	0.00769	0.0149351	9	44
GO:0023057	negative regulation of signaling	PGSC0003DMT400023459,PGSC0003DMT400023971,PGSC0003DMT400033827,PGSC0003DMT400047079,PGSC0003DMT400048756,PGSC0003DMT400075895,PGSC0003DMT400075899,PGSC0003DMT400076840,PGSC0003DMT400076977	BP	0.00769	0.0149351	9	44
GO:0010556	regulation of macromolecule biosynthetic process	PGSC0003DMT400003796,PGSC0003DMT400010431,PGSC0003DMT400011661,PGSC0003DMT400014350,PGSC0003DMT400017833,PGSC0003DMT400023432,PGSC0003DMT400023459,PGSC0003DMT400028061,PGSC0003DMT400033560,PGSC0003DMT400034911,PGSC0003DMT400037716,PGSC0003DMT400047079,PGSC0003DMT400048756,PGSC0003DMT400049575,PGSC0003DMT400053433,PGSC0003DMT400058471,PGSC0003DMT400060403,PGSC0003DMT400060836,PGSC0003DMT400061942,…	BP	0.00778	0.0148642	30	234
GO:0010017	red or far-red light signaling pathway	PGSC0003DMT400003078,PGSC0003DMT400034706,PGSC0003DMT400036075,PGSC0003DMT400047079,PGSC0003DMT400048756,PGSC0003DMT400058735,PGSC0003DMT400066807,PGSC0003DMT400067540	BP	0.00834	0.0157422	8	37
GO:0071489	cellular response to red or far red light	PGSC0003DMT400003078,PGSC0003DMT400034706,PGSC0003DMT400036075,PGSC0003DMT400047079,PGSC0003DMT400048756,PGSC0003DMT400058735,PGSC0003DMT400066807,PGSC0003DMT400067540	BP	0.00834	0.0157422	8	37
GO:0016567	protein ubiquitination	PGSC0003DMT400002312,PGSC0003DMT400005512,PGSC0003DMT400008560,PGSC0003DMT400009802,PGSC0003DMT400010881,PGSC0003DMT400014816,PGSC0003DMT400015306,PGSC0003DMT400015825,PGSC0003DMT400016998,PGSC0003DMT400021649,PGSC0003DMT400022573,PGSC0003DMT400027542,PGSC0003DMT400031245,PGSC0003DMT400032735,PGSC0003DMT400034706,PGSC0003DMT400036075,PGSC0003DMT400038537,PGSC0003DMT400042138,PGSC0003DMT400044280,…	BP	0.00847	0.0157972	43	367
GO:0032446	protein modification by small protein conjugation	PGSC0003DMT400002312,PGSC0003DMT400005512,PGSC0003DMT400008560,PGSC0003DMT400009802,PGSC0003DMT400010881,PGSC0003DMT400014816,PGSC0003DMT400015306,PGSC0003DMT400015825,PGSC0003DMT400016998,PGSC0003DMT400021649,PGSC0003DMT400022573,PGSC0003DMT400027542,PGSC0003DMT400031245,PGSC0003DMT400032059,PGSC0003DMT400032735,PGSC0003DMT400034706,PGSC0003DMT400036075,PGSC0003DMT400038537,PGSC0003DMT400039878,…	BP	0.00858	0.0158764	45	388
GO:0010218	response to far red light	PGSC0003DMT400022039,PGSC0003DMT400044562,PGSC0003DMT400079856	BP	0.00879	0.0160751	3	6
GO:0055083	monovalent inorganic anion homeostasis	PGSC0003DMT400008264,PGSC0003DMT400020425,PGSC0003DMT400037716	BP	0.00879	0.0160751	3	6
GO:1901001	negative regulation of response to salt stress	PGSC0003DMT400060403,PGSC0003DMT400064306,PGSC0003DMT400069921,PGSC0003DMT400097756	BP	0.00888	0.0160523	4	11
GO:0090304	nucleic acid metabolic process	PGSC0003DMT400000568,PGSC0003DMT400000917,PGSC0003DMT400001746,PGSC0003DMT400001821,PGSC0003DMT400003796,PGSC0003DMT400010431,PGSC0003DMT400010908,PGSC0003DMT400011022,PGSC0003DMT400012169,PGSC0003DMT400012431,PGSC0003DMT400013036,PGSC0003DMT400014350,PGSC0003DMT400014424,PGSC0003DMT400015074,PGSC0003DMT400015483,PGSC0003DMT400017833,PGSC0003DMT400018531,PGSC0003DMT400023432,PGSC0003DMT400023459,…	BP	0.00901	0.016163	76	721
GO:0009889	regulation of biosynthetic process	PGSC0003DMT400003796,PGSC0003DMT400010431,PGSC0003DMT400011661,PGSC0003DMT400014350,PGSC0003DMT400017833,PGSC0003DMT400023432,PGSC0003DMT400023459,PGSC0003DMT400028061,PGSC0003DMT400033560,PGSC0003DMT400033827,PGSC0003DMT400034911,PGSC0003DMT400037716,PGSC0003DMT400047079,PGSC0003DMT400048756,PGSC0003DMT400049575,PGSC0003DMT400053433,PGSC0003DMT400058471,PGSC0003DMT400060403,PGSC0003DMT400060836,…	BP	0.00932	0.0165924	31	247
GO:0010286	heat acclimation	PGSC0003DMT400008264,PGSC0003DMT400020425,PGSC0003DMT400033475,PGSC0003DMT400051809,PGSC0003DMT400055930	BP	0.00935	0.0163974	5	17
GO:0043085	positive regulation of catalytic activity	PGSC0003DMT400026093,PGSC0003DMT400033827,PGSC0003DMT400034618,PGSC0003DMT400037472,PGSC0003DMT400059966	BP	0.00935	0.0163974	5	17
GO:1901002	positive regulation of response to salt stress	PGSC0003DMT400000985,PGSC0003DMT400003796,PGSC0003DMT400008264,PGSC0003DMT400020425,PGSC0003DMT400037472	BP	0.00935	0.0163974	5	17
GO:0071704	organic substance metabolic process	PGSC0003DMT400000192,PGSC0003DMT400000447,PGSC0003DMT400000553,PGSC0003DMT400000568,PGSC0003DMT400000747,PGSC0003DMT400000917,PGSC0003DMT400000946,PGSC0003DMT400001350,PGSC0003DMT400001354,PGSC0003DMT400001709,PGSC0003DMT400001746,PGSC0003DMT400001821,PGSC0003DMT400002019,PGSC0003DMT400002312,PGSC0003DMT400002555,PGSC0003DMT400002558,PGSC0003DMT400002866,PGSC0003DMT400003537,PGSC0003DMT400003796,…	BP	0.00979	0.0169165	347	3913
GO:0009744	response to sucrose	PGSC0003DMT400004695,PGSC0003DMT400011661,PGSC0003DMT400014350,PGSC0003DMT400017167,PGSC0003DMT400023336,PGSC0003DMT400053433,PGSC0003DMT400067858,PGSC0003DMT400068383	BP	0.00983	0.0167395	8	38
GO:0015994	chlorophyll metabolic process	PGSC0003DMT400002866,PGSC0003DMT400008034,PGSC0003DMT400029316,PGSC0003DMT400036942,PGSC0003DMT400050234,PGSC0003DMT400064369,PGSC0003DMT400069485,PGSC0003DMT400070176	BP	0.00983	0.0167395	8	38
GO:0034285	response to disaccharide	PGSC0003DMT400004695,PGSC0003DMT400011661,PGSC0003DMT400014350,PGSC0003DMT400017167,PGSC0003DMT400023336,PGSC0003DMT400053433,PGSC0003DMT400067858,PGSC0003DMT400068383	BP	0.00983	0.0167395	8	38
GO:0072330	monocarboxylic acid biosynthetic process	PGSC0003DMT400001350,PGSC0003DMT400001354,PGSC0003DMT400001709,PGSC0003DMT400002555,PGSC0003DMT400007615,PGSC0003DMT400008103,PGSC0003DMT400009451,PGSC0003DMT400011861,PGSC0003DMT400014133,PGSC0003DMT400014713,PGSC0003DMT400015633,PGSC0003DMT400017594,PGSC0003DMT400028158,PGSC0003DMT400032993,PGSC0003DMT400034299,PGSC0003DMT400043111,PGSC0003DMT400043501,PGSC0003DMT400048344,PGSC0003DMT400049886,…	BP	0.00986	0.0165507	32	258
GO:0007059	chromosome segregation	PGSC0003DMT400008577,PGSC0003DMT400015825,PGSC0003DMT400032552,PGSC0003DMT400051914,PGSC0003DMT400068720,PGSC0003DMT400068726,PGSC0003DMT400068727	BP	0.01046	0.0174333	7	31
GO:0019219	regulation of nucleobase-containing compound metabolic process	PGSC0003DMT400003796,PGSC0003DMT400014350,PGSC0003DMT400017833,PGSC0003DMT400018531,PGSC0003DMT400023432,PGSC0003DMT400023459,PGSC0003DMT400028061,PGSC0003DMT400033560,PGSC0003DMT400037716,PGSC0003DMT400047079,PGSC0003DMT400048756,PGSC0003DMT400053433,PGSC0003DMT400054608,PGSC0003DMT400058471,PGSC0003DMT400060403,PGSC0003DMT400061942,PGSC0003DMT400064306,PGSC0003DMT400065483,PGSC0003DMT400067321,…	BP	0.01119	0.0185187	25	191
GO:0031323	regulation of cellular metabolic process	PGSC0003DMT400003796,PGSC0003DMT400010431,PGSC0003DMT400011236,PGSC0003DMT400011562,PGSC0003DMT400011661,PGSC0003DMT400014350,PGSC0003DMT400017833,PGSC0003DMT400018531,PGSC0003DMT400022039,PGSC0003DMT400023432,PGSC0003DMT400023459,PGSC0003DMT400024599,PGSC0003DMT400026093,PGSC0003DMT400026257,PGSC0003DMT400028061,PGSC0003DMT400033560,PGSC0003DMT400033827,PGSC0003DMT400034911,PGSC0003DMT400037716,…	BP	0.01136	0.0186685	39	332
GO:0048518	positive regulation of biological process	PGSC0003DMT400000985,PGSC0003DMT400003078,PGSC0003DMT400003796,PGSC0003DMT400008264,PGSC0003DMT400010431,PGSC0003DMT400011236,PGSC0003DMT400011661,PGSC0003DMT400014350,PGSC0003DMT400017833,PGSC0003DMT400018531,PGSC0003DMT400020425,PGSC0003DMT400022039,PGSC0003DMT400026093,PGSC0003DMT400028061,PGSC0003DMT400028812,PGSC0003DMT400033560,PGSC0003DMT400033827,PGSC0003DMT400034618,PGSC0003DMT400036765,…	BP	0.01229	0.0200566	30	242
GO:0016071	mRNA metabolic process	PGSC0003DMT400000568,PGSC0003DMT400000917,PGSC0003DMT400001821,PGSC0003DMT400010431,PGSC0003DMT400010908,PGSC0003DMT400012169,PGSC0003DMT400012431,PGSC0003DMT400013036,PGSC0003DMT400014424,PGSC0003DMT400015074,PGSC0003DMT400018531,PGSC0003DMT400029379,PGSC0003DMT400029666,PGSC0003DMT400033081,PGSC0003DMT400040069,PGSC0003DMT400042233,PGSC0003DMT400043101,PGSC0003DMT400044280,PGSC0003DMT400045694,…	BP	0.01278	0.0207124	33	273
GO:0009873	ethylene-activated signaling pathway	PGSC0003DMT400002375,PGSC0003DMT400005836,PGSC0003DMT400006170,PGSC0003DMT400007511,PGSC0003DMT400010296,PGSC0003DMT400010297,PGSC0003DMT400011693,PGSC0003DMT400012547,PGSC0003DMT400015825,PGSC0003DMT400021312,PGSC0003DMT400022476,PGSC0003DMT400024508,PGSC0003DMT400035731,PGSC0003DMT400041327,PGSC0003DMT400060160,PGSC0003DMT400067472,PGSC0003DMT400068720,PGSC0003DMT400068726,PGSC0003DMT400068727,…	BP	0.01329	0.0213914	24	184
GO:0007584	response to nutrient	PGSC0003DMT400054443,PGSC0003DMT400059054,PGSC0003DMT400067858	BP	0.01446	0.0228828	3	7
GO:0042255	ribosome assembly	PGSC0003DMT400024400,PGSC0003DMT400062828,PGSC0003DMT400069333	BP	0.01446	0.0228828	3	7
GO:0048564	photosystem I assembly	PGSC0003DMT400001417,PGSC0003DMT400016981,PGSC0003DMT400081870	BP	0.01446	0.0228828	3	7
GO:0051345	positive regulation of hydrolase activity	PGSC0003DMT400033827,PGSC0003DMT400034618,PGSC0003DMT400037472	BP	0.01446	0.0228828	3	7
GO:0071369	cellular response to ethylene stimulus	PGSC0003DMT400002375,PGSC0003DMT400005836,PGSC0003DMT400006170,PGSC0003DMT400007511,PGSC0003DMT400010296,PGSC0003DMT400010297,PGSC0003DMT400011693,PGSC0003DMT400012547,PGSC0003DMT400015825,PGSC0003DMT400021312,PGSC0003DMT400022476,PGSC0003DMT400024508,PGSC0003DMT400035731,PGSC0003DMT400041327,PGSC0003DMT400060160,PGSC0003DMT400067472,PGSC0003DMT400068720,PGSC0003DMT400068726,PGSC0003DMT400068727,…	BP	0.01504	0.0234066	24	186
GO:0009787	regulation of abscisic acid-activated signaling pathway	PGSC0003DMT400011627,PGSC0003DMT400023459,PGSC0003DMT400028812,PGSC0003DMT400033827,PGSC0003DMT400034618,PGSC0003DMT400037472,PGSC0003DMT400060403,PGSC0003DMT400075895,PGSC0003DMT400075899,PGSC0003DMT400076840	BP	0.01511	0.0232082	10	57
GO:1901419	regulation of response to alcohol	PGSC0003DMT400011627,PGSC0003DMT400023459,PGSC0003DMT400028812,PGSC0003DMT400033827,PGSC0003DMT400034618,PGSC0003DMT400037472,PGSC0003DMT400060403,PGSC0003DMT400075895,PGSC0003DMT400075899,PGSC0003DMT400076840	BP	0.01511	0.0232082	10	57
GO:1905957	regulation of cellular response to alcohol	PGSC0003DMT400011627,PGSC0003DMT400023459,PGSC0003DMT400028812,PGSC0003DMT400033827,PGSC0003DMT400034618,PGSC0003DMT400037472,PGSC0003DMT400060403,PGSC0003DMT400075895,PGSC0003DMT400075899,PGSC0003DMT400076840	BP	0.01511	0.0232082	10	57
GO:0034284	response to monosaccharide	PGSC0003DMT400004695,PGSC0003DMT400011661,PGSC0003DMT400017167,PGSC0003DMT400036899,PGSC0003DMT400067858,PGSC0003DMT400068383	BP	0.01564	0.0237123	6	26
GO:0010468	regulation of gene expression	PGSC0003DMT400003796,PGSC0003DMT400010431,PGSC0003DMT400011661,PGSC0003DMT400014350,PGSC0003DMT400017833,PGSC0003DMT400018531,PGSC0003DMT400023432,PGSC0003DMT400023459,PGSC0003DMT400028061,PGSC0003DMT400033560,PGSC0003DMT400034911,PGSC0003DMT400037716,PGSC0003DMT400040286,PGSC0003DMT400047079,PGSC0003DMT400048756,PGSC0003DMT400049575,PGSC0003DMT400053433,PGSC0003DMT400054608,PGSC0003DMT400058471,…	BP	0.01699	0.0255939	34	289
GO:0006351	transcription, DNA-templated	PGSC0003DMT400003796,PGSC0003DMT400014350,PGSC0003DMT400017833,PGSC0003DMT400023432,PGSC0003DMT400023459,PGSC0003DMT400028061,PGSC0003DMT400033560,PGSC0003DMT400037716,PGSC0003DMT400047079,PGSC0003DMT400048756,PGSC0003DMT400052092,PGSC0003DMT400053433,PGSC0003DMT400055237,PGSC0003DMT400058471,PGSC0003DMT400060403,PGSC0003DMT400061942,PGSC0003DMT400064306,PGSC0003DMT400065483,PGSC0003DMT400067321,…	BP	0.01709	0.0255806	25	198
GO:0000160	phosphorelay signal transduction system	PGSC0003DMT400002375,PGSC0003DMT400005836,PGSC0003DMT400006170,PGSC0003DMT400007511,PGSC0003DMT400010296,PGSC0003DMT400010297,PGSC0003DMT400011693,PGSC0003DMT400012547,PGSC0003DMT400015825,PGSC0003DMT400021312,PGSC0003DMT400022476,PGSC0003DMT400024508,PGSC0003DMT400029402,PGSC0003DMT400035731,PGSC0003DMT400041327,PGSC0003DMT400060160,PGSC0003DMT400063187,PGSC0003DMT400067472,PGSC0003DMT400068720,…	BP	0.01714	0.025493	26	208
GO:0034641	cellular nitrogen compound metabolic process	PGSC0003DMT400000447,PGSC0003DMT400000568,PGSC0003DMT400000917,PGSC0003DMT400000946,PGSC0003DMT400001746,PGSC0003DMT400001821,PGSC0003DMT400002558,PGSC0003DMT400002866,PGSC0003DMT400003796,PGSC0003DMT400004200,PGSC0003DMT400007325,PGSC0003DMT400008034,PGSC0003DMT400008103,PGSC0003DMT400010431,PGSC0003DMT400010908,PGSC0003DMT400011022,PGSC0003DMT400011661,PGSC0003DMT400012169,PGSC0003DMT400012431,…	BP	0.01803	0.0266481	126	1310
GO:0097659	nucleic acid-templated transcription	PGSC0003DMT400003796,PGSC0003DMT400014350,PGSC0003DMT400017833,PGSC0003DMT400023432,PGSC0003DMT400023459,PGSC0003DMT400028061,PGSC0003DMT400033560,PGSC0003DMT400037716,PGSC0003DMT400047079,PGSC0003DMT400048756,PGSC0003DMT400052092,PGSC0003DMT400053433,PGSC0003DMT400055237,PGSC0003DMT400058471,PGSC0003DMT400060403,PGSC0003DMT400061942,PGSC0003DMT400064306,PGSC0003DMT400065483,PGSC0003DMT400067321,…	BP	0.0181	0.0265844	25	199
GO:0000304	response to singlet oxygen	PGSC0003DMT400054443,PGSC0003DMT400059054	BP	0.0186	0.0262523	2	3
GO:0008544	epidermis development	PGSC0003DMT400000547,PGSC0003DMT400051944	BP	0.0186	0.0262523	2	3
GO:0009913	epidermal cell differentiation	PGSC0003DMT400000547,PGSC0003DMT400051944	BP	0.0186	0.0262523	2	3
GO:0018343	protein farnesylation	PGSC0003DMT400069166,PGSC0003DMT400069476	BP	0.0186	0.0262523	2	3
GO:0030002	cellular anion homeostasis	PGSC0003DMT400008264,PGSC0003DMT400020425	BP	0.0186	0.0262523	2	3
GO:0030320	cellular monovalent inorganic anion homeostasis	PGSC0003DMT400008264,PGSC0003DMT400020425	BP	0.0186	0.0262523	2	3
GO:0030644	cellular chloride ion homeostasis	PGSC0003DMT400008264,PGSC0003DMT400020425	BP	0.0186	0.0262523	2	3
GO:0030855	epithelial cell differentiation	PGSC0003DMT400000547,PGSC0003DMT400051944	BP	0.0186	0.0262523	2	3
GO:0030856	regulation of epithelial cell differentiation	PGSC0003DMT400000547,PGSC0003DMT400051944	BP	0.0186	0.0262523	2	3
GO:0045604	regulation of epidermal cell differentiation	PGSC0003DMT400000547,PGSC0003DMT400051944	BP	0.0186	0.0262523	2	3
GO:0045682	regulation of epidermis development	PGSC0003DMT400000547,PGSC0003DMT400051944	BP	0.0186	0.0262523	2	3
GO:0060429	epithelium development	PGSC0003DMT400000547,PGSC0003DMT400051944	BP	0.0186	0.0262523	2	3
GO:0006636	unsaturated fatty acid biosynthetic process	PGSC0003DMT400001709,PGSC0003DMT400007615,PGSC0003DMT400061218,PGSC0003DMT400083859,PGSC0003DMT400086433,PGSC0003DMT400092081	BP	0.01877	0.0254233	6	27
GO:0033559	unsaturated fatty acid metabolic process	PGSC0003DMT400001709,PGSC0003DMT400007615,PGSC0003DMT400061218,PGSC0003DMT400083859,PGSC0003DMT400086433,PGSC0003DMT400092081	BP	0.01877	0.0254233	6	27
GO:0080134	regulation of response to stress	PGSC0003DMT400000985,PGSC0003DMT400003796,PGSC0003DMT400008264,PGSC0003DMT400011627,PGSC0003DMT400020425,PGSC0003DMT400022039,PGSC0003DMT400023459,PGSC0003DMT400026093,PGSC0003DMT400028061,PGSC0003DMT400037472,PGSC0003DMT400060330,PGSC0003DMT400060403,PGSC0003DMT400064306,PGSC0003DMT400065548,PGSC0003DMT400069921,PGSC0003DMT400097756	BP	0.01943	0.0260917	16	113
GO:0050790	regulation of catalytic activity	PGSC0003DMT400011562,PGSC0003DMT400024599,PGSC0003DMT400026093,PGSC0003DMT400026257,PGSC0003DMT400033827,PGSC0003DMT400034618,PGSC0003DMT400037472,PGSC0003DMT400039743,PGSC0003DMT400059966	BP	0.01992	0.0265977	9	51
GO:0006778	porphyrin-containing compound metabolic process	PGSC0003DMT400002866,PGSC0003DMT400008034,PGSC0003DMT400029316,PGSC0003DMT400036942,PGSC0003DMT400050234,PGSC0003DMT400064369,PGSC0003DMT400069485,PGSC0003DMT400070176	BP	0.02041	0.0270217	8	43
GO:0033013	tetrapyrrole metabolic process	PGSC0003DMT400002866,PGSC0003DMT400008034,PGSC0003DMT400029316,PGSC0003DMT400036942,PGSC0003DMT400050234,PGSC0003DMT400064369,PGSC0003DMT400069485,PGSC0003DMT400070176	BP	0.02041	0.0270217	8	43
GO:0009640	photomorphogenesis	PGSC0003DMT400008044,PGSC0003DMT400009328,PGSC0003DMT400064369	BP	0.02176	0.0282519	3	8
GO:0036293	response to decreased oxygen levels	PGSC0003DMT400018798,PGSC0003DMT400023336,PGSC0003DMT400025712	BP	0.02176	0.0282519	3	8
GO:0055078	sodium ion homeostasis	PGSC0003DMT400008264,PGSC0003DMT400020425,PGSC0003DMT400097756	BP	0.02176	0.0282519	3	8
GO:0070482	response to oxygen levels	PGSC0003DMT400018798,PGSC0003DMT400023336,PGSC0003DMT400025712	BP	0.02176	0.0282519	3	8
GO:1901564	organonitrogen compound metabolic process	PGSC0003DMT400000192,PGSC0003DMT400000447,PGSC0003DMT400000946,PGSC0003DMT400002312,PGSC0003DMT400002558,PGSC0003DMT400002866,PGSC0003DMT400004200,PGSC0003DMT400004400,PGSC0003DMT400005512,PGSC0003DMT400007325,PGSC0003DMT400008034,PGSC0003DMT400008103,PGSC0003DMT400008560,PGSC0003DMT400009551,PGSC0003DMT400009802,PGSC0003DMT400010431,PGSC0003DMT400010881,PGSC0003DMT400010985,PGSC0003DMT400011562,…	BP	0.02176	0.0282519	167	1796
GO:0009749	response to glucose	PGSC0003DMT400004695,PGSC0003DMT400011661,PGSC0003DMT400017167,PGSC0003DMT400036899,PGSC0003DMT400068383	BP	0.02349	0.0300008	5	21
GO:0006139	nucleobase-containing compound metabolic process	PGSC0003DMT400000568,PGSC0003DMT400000917,PGSC0003DMT400001746,PGSC0003DMT400001821,PGSC0003DMT400002558,PGSC0003DMT400003796,PGSC0003DMT400008103,PGSC0003DMT400010431,PGSC0003DMT400010908,PGSC0003DMT400011022,PGSC0003DMT400012169,PGSC0003DMT400012431,PGSC0003DMT400013036,PGSC0003DMT400014350,PGSC0003DMT400014424,PGSC0003DMT400015074,PGSC0003DMT400015282,PGSC0003DMT400015483,PGSC0003DMT400017833,…	BP	0.02399	0.0304738	96	979
GO:0008610	lipid biosynthetic process	PGSC0003DMT400000747,PGSC0003DMT400001350,PGSC0003DMT400001354,PGSC0003DMT400001709,PGSC0003DMT400002555,PGSC0003DMT400007615,PGSC0003DMT400008586,PGSC0003DMT400009451,PGSC0003DMT400010866,PGSC0003DMT400011861,PGSC0003DMT400014133,PGSC0003DMT400014713,PGSC0003DMT400015633,PGSC0003DMT400017594,PGSC0003DMT400018242,PGSC0003DMT400025979,PGSC0003DMT400027444,PGSC0003DMT400027448,PGSC0003DMT400028158,…	BP	0.02434	0.0307522	52	489
GO:1901576	organic substance biosynthetic process	PGSC0003DMT400000553,PGSC0003DMT400000747,PGSC0003DMT400000946,PGSC0003DMT400001350,PGSC0003DMT400001354,PGSC0003DMT400001709,PGSC0003DMT400002555,PGSC0003DMT400002558,PGSC0003DMT400002866,PGSC0003DMT400003537,PGSC0003DMT400003796,PGSC0003DMT400004200,PGSC0003DMT400007325,PGSC0003DMT400007615,PGSC0003DMT400008034,PGSC0003DMT400008103,PGSC0003DMT400008586,PGSC0003DMT400009175,PGSC0003DMT400009287,…	BP	0.02473	0.0310778	162	1744
GO:0032268	regulation of cellular protein metabolic process	PGSC0003DMT400010431,PGSC0003DMT400011562,PGSC0003DMT400011661,PGSC0003DMT400024599,PGSC0003DMT400026093,PGSC0003DMT400026257,PGSC0003DMT400028061,PGSC0003DMT400033560,PGSC0003DMT400034911,PGSC0003DMT400049575,PGSC0003DMT400058471,PGSC0003DMT400060836,PGSC0003DMT400062439,PGSC0003DMT400076704,PGSC0003DMT400079501	BP	0.02512	0.0313167	15	107
GO:0051246	regulation of protein metabolic process	PGSC0003DMT400010431,PGSC0003DMT400011562,PGSC0003DMT400011661,PGSC0003DMT400024599,PGSC0003DMT400026093,PGSC0003DMT400026257,PGSC0003DMT400028061,PGSC0003DMT400033560,PGSC0003DMT400034911,PGSC0003DMT400049575,PGSC0003DMT400058471,PGSC0003DMT400060836,PGSC0003DMT400062439,PGSC0003DMT400076704,PGSC0003DMT400079501	BP	0.02512	0.0313167	15	107
GO:0032774	RNA biosynthetic process	PGSC0003DMT400003796,PGSC0003DMT400014350,PGSC0003DMT400017833,PGSC0003DMT400023432,PGSC0003DMT400023459,PGSC0003DMT400028061,PGSC0003DMT400033560,PGSC0003DMT400037716,PGSC0003DMT400047079,PGSC0003DMT400048756,PGSC0003DMT400052092,PGSC0003DMT400053433,PGSC0003DMT400055237,PGSC0003DMT400058471,PGSC0003DMT400060403,PGSC0003DMT400061942,PGSC0003DMT400064306,PGSC0003DMT400065483,PGSC0003DMT400067321,…	BP	0.02659	0.0328876	25	206
GO:0048522	positive regulation of cellular process	PGSC0003DMT400003796,PGSC0003DMT400010431,PGSC0003DMT400011236,PGSC0003DMT400011661,PGSC0003DMT400014350,PGSC0003DMT400017833,PGSC0003DMT400018531,PGSC0003DMT400026093,PGSC0003DMT400028061,PGSC0003DMT400028812,PGSC0003DMT400033560,PGSC0003DMT400033827,PGSC0003DMT400034618,PGSC0003DMT400037472,PGSC0003DMT400048756,PGSC0003DMT400060403,PGSC0003DMT400064306,PGSC0003DMT400065548,PGSC0003DMT400067321,…	BP	0.02683	0.0330107	22	176
GO:0090351	seedling development	PGSC0003DMT400000365,PGSC0003DMT400003228,PGSC0003DMT400011627,PGSC0003DMT400033827,PGSC0003DMT400070362,PGSC0003DMT400077712,PGSC0003DMT400078745	BP	0.02688	0.0329	7	37
GO:0035556	intracellular signal transduction	PGSC0003DMT400002375,PGSC0003DMT400005836,PGSC0003DMT400006170,PGSC0003DMT400007511,PGSC0003DMT400010296,PGSC0003DMT400010297,PGSC0003DMT400011693,PGSC0003DMT400012547,PGSC0003DMT400015825,PGSC0003DMT400021312,PGSC0003DMT400022476,PGSC0003DMT400024508,PGSC0003DMT400026093,PGSC0003DMT400029402,PGSC0003DMT400035731,PGSC0003DMT400041327,PGSC0003DMT400060160,PGSC0003DMT400063187,PGSC0003DMT400067472,…	BP	0.02745	0.0334236	27	227
GO:2000026	regulation of multicellular organismal development	PGSC0003DMT400000365,PGSC0003DMT400000547,PGSC0003DMT400003228,PGSC0003DMT400008044,PGSC0003DMT400009328,PGSC0003DMT400018728,PGSC0003DMT400019785,PGSC0003DMT400022039,PGSC0003DMT400028061,PGSC0003DMT400036765,PGSC0003DMT400039303,PGSC0003DMT400051944,PGSC0003DMT400058735,PGSC0003DMT400060403,PGSC0003DMT400061942,PGSC0003DMT400065548,PGSC0003DMT400077712,PGSC0003DMT400079501	BP	0.02753	0.0333482	18	137
GO:0009743	response to carbohydrate	PGSC0003DMT400004695,PGSC0003DMT400011661,PGSC0003DMT400014350,PGSC0003DMT400017167,PGSC0003DMT400023336,PGSC0003DMT400036899,PGSC0003DMT400053433,PGSC0003DMT400067858,PGSC0003DMT400068383	BP	0.02807	0.0338279	9	54
GO:0009788	negative regulation of abscisic acid-activated signaling pathway	PGSC0003DMT400023459,PGSC0003DMT400033827,PGSC0003DMT400075895,PGSC0003DMT400075899,PGSC0003DMT400076840	BP	0.02843	0.0338281	5	22
GO:0046283	anthocyanin-containing compound metabolic process	PGSC0003DMT400009287,PGSC0003DMT400016512,PGSC0003DMT400022039,PGSC0003DMT400062562,PGSC0003DMT400065548	BP	0.02843	0.0338281	5	22
GO:1901420	negative regulation of response to alcohol	PGSC0003DMT400023459,PGSC0003DMT400033827,PGSC0003DMT400075895,PGSC0003DMT400075899,PGSC0003DMT400076840	BP	0.02843	0.0338281	5	22
GO:1905958	negative regulation of cellular response to alcohol	PGSC0003DMT400023459,PGSC0003DMT400033827,PGSC0003DMT400075895,PGSC0003DMT400075899,PGSC0003DMT400076840	BP	0.02843	0.0338281	5	22
GO:0019222	regulation of metabolic process	PGSC0003DMT400003796,PGSC0003DMT400010431,PGSC0003DMT400011236,PGSC0003DMT400011562,PGSC0003DMT400011661,PGSC0003DMT400014350,PGSC0003DMT400017833,PGSC0003DMT400018531,PGSC0003DMT400022039,PGSC0003DMT400023432,PGSC0003DMT400023459,PGSC0003DMT400024599,PGSC0003DMT400026093,PGSC0003DMT400026257,PGSC0003DMT400028061,PGSC0003DMT400033560,PGSC0003DMT400033827,PGSC0003DMT400034911,PGSC0003DMT400037716,…	BP	0.02962	0.0348035	44	408
GO:2000024	regulation of leaf development	PGSC0003DMT400000547,PGSC0003DMT400018728,PGSC0003DMT400022039,PGSC0003DMT400039303,PGSC0003DMT400051944,PGSC0003DMT400060403,PGSC0003DMT400065548	BP	0.03073	0.0359281	7	38
GO:0006417	regulation of translation	PGSC0003DMT400010431,PGSC0003DMT400011661,PGSC0003DMT400033560,PGSC0003DMT400034911,PGSC0003DMT400049575,PGSC0003DMT400058471,PGSC0003DMT400060836,PGSC0003DMT400062439,PGSC0003DMT400076704	BP	0.03125	0.0362654	9	55
GO:0034248	regulation of cellular amide metabolic process	PGSC0003DMT400010431,PGSC0003DMT400011661,PGSC0003DMT400033560,PGSC0003DMT400034911,PGSC0003DMT400049575,PGSC0003DMT400058471,PGSC0003DMT400060836,PGSC0003DMT400062439,PGSC0003DMT400076704	BP	0.03125	0.0362654	9	55
GO:0031667	response to nutrient levels	PGSC0003DMT400004695,PGSC0003DMT400017167,PGSC0003DMT400018643,PGSC0003DMT400054443,PGSC0003DMT400059054,PGSC0003DMT400064277,PGSC0003DMT400067858,PGSC0003DMT400068383	BP	0.03334	0.0384064	8	47
GO:0009746	response to hexose	PGSC0003DMT400004695,PGSC0003DMT400011661,PGSC0003DMT400017167,PGSC0003DMT400036899,PGSC0003DMT400068383	BP	0.03398	0.0389527	5	23
GO:0048831	regulation of shoot system development	PGSC0003DMT400000547,PGSC0003DMT400018728,PGSC0003DMT400022039,PGSC0003DMT400028061,PGSC0003DMT400036765,PGSC0003DMT400039303,PGSC0003DMT400051944,PGSC0003DMT400060403,PGSC0003DMT400065548	BP	0.03467	0.0395507	9	56
GO:0010608	posttranscriptional regulation of gene expression	PGSC0003DMT400010431,PGSC0003DMT400011661,PGSC0003DMT400018531,PGSC0003DMT400033560,PGSC0003DMT400034911,PGSC0003DMT400049575,PGSC0003DMT400058471,PGSC0003DMT400060836,PGSC0003DMT400062439,PGSC0003DMT400076704	BP	0.03512	0.0398705	10	65
GO:0009645	response to low light intensity stimulus	PGSC0003DMT400022039,PGSC0003DMT400083158	BP	0.03521	0.0391222	2	4
GO:0010099	regulation of photomorphogenesis	PGSC0003DMT400008044,PGSC0003DMT400009328	BP	0.03521	0.0391222	2	4
GO:0034644	cellular response to UV	PGSC0003DMT400042742,PGSC0003DMT400066554	BP	0.03521	0.0391222	2	4
GO:0042538	hyperosmotic salinity response	PGSC0003DMT400008264,PGSC0003DMT400020425	BP	0.03521	0.0391222	2	4
GO:0055064	chloride ion homeostasis	PGSC0003DMT400008264,PGSC0003DMT400020425	BP	0.03521	0.0391222	2	4
GO:0090229	negative regulation of red or far-red light signaling pathway	PGSC0003DMT400047079,PGSC0003DMT400048756	BP	0.03521	0.0391222	2	4
GO:1902882	regulation of response to oxidative stress	PGSC0003DMT400008264,PGSC0003DMT400020425	BP	0.03521	0.0391222	2	4
GO:1902884	positive regulation of response to oxidative stress	PGSC0003DMT400008264,PGSC0003DMT400020425	BP	0.03521	0.0391222	2	4
GO:0034605	cellular response to heat	PGSC0003DMT400018798,PGSC0003DMT400023336,PGSC0003DMT400025712,PGSC0003DMT400051809	BP	0.03541	0.0384358	4	16
GO:0090696	post-embryonic plant organ development	PGSC0003DMT400000547,PGSC0003DMT400022039,PGSC0003DMT400035511,PGSC0003DMT400063955	BP	0.03541	0.0384358	4	16
GO:0051239	regulation of multicellular organismal process	PGSC0003DMT400000365,PGSC0003DMT400000547,PGSC0003DMT400003228,PGSC0003DMT400008044,PGSC0003DMT400009328,PGSC0003DMT400018728,PGSC0003DMT400019785,PGSC0003DMT400022039,PGSC0003DMT400028061,PGSC0003DMT400036765,PGSC0003DMT400039303,PGSC0003DMT400051944,PGSC0003DMT400058735,PGSC0003DMT400060403,PGSC0003DMT400061942,PGSC0003DMT400065548,PGSC0003DMT400077712,PGSC0003DMT400079501	BP	0.03994	0.0430546	18	143
GO:0006725	cellular aromatic compound metabolic process	PGSC0003DMT400000447,PGSC0003DMT400000568,PGSC0003DMT400000917,PGSC0003DMT400001746,PGSC0003DMT400001821,PGSC0003DMT400002558,PGSC0003DMT400002866,PGSC0003DMT400003796,PGSC0003DMT400008034,PGSC0003DMT400008103,PGSC0003DMT400009471,PGSC0003DMT400009551,PGSC0003DMT400010431,PGSC0003DMT400010908,PGSC0003DMT400011022,PGSC0003DMT400012169,PGSC0003DMT400012431,PGSC0003DMT400013036,PGSC0003DMT400014350,…	BP	0.04018	0.0431155	116	1232
GO:1900618	regulation of shoot system morphogenesis	PGSC0003DMT400022039,PGSC0003DMT400039303,PGSC0003DMT400060403	BP	0.04128	0.0439946	3	10
GO:1901371	regulation of leaf morphogenesis	PGSC0003DMT400022039,PGSC0003DMT400039303,PGSC0003DMT400060403	BP	0.04128	0.0439946	3	10
GO:0006952	defense response	PGSC0003DMT400000192,PGSC0003DMT400001350,PGSC0003DMT400001354,PGSC0003DMT400002019,PGSC0003DMT400004046,PGSC0003DMT400005086,PGSC0003DMT400005546,PGSC0003DMT400005836,PGSC0003DMT400006229,PGSC0003DMT400009064,PGSC0003DMT400010890,PGSC0003DMT400010891,PGSC0003DMT400011236,PGSC0003DMT400011261,PGSC0003DMT400014424,PGSC0003DMT400018531,PGSC0003DMT400022039,PGSC0003DMT400022474,PGSC0003DMT400023459,…	BP	0.0426	0.0450946	68	685
GO:0009058	biosynthetic process	PGSC0003DMT400000553,PGSC0003DMT400000747,PGSC0003DMT400000946,PGSC0003DMT400001350,PGSC0003DMT400001354,PGSC0003DMT400001709,PGSC0003DMT400002555,PGSC0003DMT400002558,PGSC0003DMT400002866,PGSC0003DMT400003537,PGSC0003DMT400003796,PGSC0003DMT400004200,PGSC0003DMT400007325,PGSC0003DMT400007615,PGSC0003DMT400008034,PGSC0003DMT400008103,PGSC0003DMT400008586,PGSC0003DMT400009175,PGSC0003DMT400009287,…	BP	0.04279	0.0450926	164	1798
GO:0006109	regulation of carbohydrate metabolic process	PGSC0003DMT400028061,PGSC0003DMT400033827,PGSC0003DMT400039743,PGSC0003DMT400059966	BP	0.04343	0.0455627	4	17
GO:0044271	cellular nitrogen compound biosynthetic process	PGSC0003DMT400000946,PGSC0003DMT400002558,PGSC0003DMT400002866,PGSC0003DMT400003796,PGSC0003DMT400004200,PGSC0003DMT400007325,PGSC0003DMT400008034,PGSC0003DMT400008103,PGSC0003DMT400010431,PGSC0003DMT400011661,PGSC0003DMT400014350,PGSC0003DMT400017833,PGSC0003DMT400019783,PGSC0003DMT400019914,PGSC0003DMT400023432,PGSC0003DMT400023459,PGSC0003DMT400026053,PGSC0003DMT400026512,PGSC0003DMT400028061,…	BP	0.04502	0.0470209	71	721
GO:0009739	response to gibberellin	PGSC0003DMT400008560,PGSC0003DMT400014350,PGSC0003DMT400033827,PGSC0003DMT400037716,PGSC0003DMT400040064,PGSC0003DMT400049448,PGSC0003DMT400053433,PGSC0003DMT400060403,PGSC0003DMT400071048	BP	0.04644	0.0482894	9	59
GO:0007602	phototransduction	PGSC0003DMT400003078,PGSC0003DMT400034706,PGSC0003DMT400036075,PGSC0003DMT400058735,PGSC0003DMT400066807,PGSC0003DMT400067540	BP	0.04659	0.0478107	6	33
GO:0009581	detection of external stimulus	PGSC0003DMT400003078,PGSC0003DMT400034706,PGSC0003DMT400036075,PGSC0003DMT400058735,PGSC0003DMT400066807,PGSC0003DMT400067540	BP	0.04659	0.0478107	6	33
GO:0009582	detection of abiotic stimulus	PGSC0003DMT400003078,PGSC0003DMT400034706,PGSC0003DMT400036075,PGSC0003DMT400058735,PGSC0003DMT400066807,PGSC0003DMT400067540	BP	0.04659	0.0478107	6	33
GO:0009583	detection of light stimulus	PGSC0003DMT400003078,PGSC0003DMT400034706,PGSC0003DMT400036075,PGSC0003DMT400058735,PGSC0003DMT400066807,PGSC0003DMT400067540	BP	0.04659	0.0478107	6	33
GO:0009585	red, far-red light phototransduction	PGSC0003DMT400003078,PGSC0003DMT400034706,PGSC0003DMT400036075,PGSC0003DMT400058735,PGSC0003DMT400066807,PGSC0003DMT400067540	BP	0.04659	0.0478107	6	33
GO:0060255	regulation of macromolecule metabolic process	PGSC0003DMT400003796,PGSC0003DMT400010431,PGSC0003DMT400011562,PGSC0003DMT400011661,PGSC0003DMT400014350,PGSC0003DMT400017833,PGSC0003DMT400018531,PGSC0003DMT400023432,PGSC0003DMT400023459,PGSC0003DMT400024599,PGSC0003DMT400026093,PGSC0003DMT400026257,PGSC0003DMT400028061,PGSC0003DMT400033560,PGSC0003DMT400034911,PGSC0003DMT400037716,PGSC0003DMT400040286,PGSC0003DMT400047079,PGSC0003DMT400048756,…	BP	0.04857	0.0491981	38	357
GO:0065003	protein-containing complex assembly	PGSC0003DMT400001417,PGSC0003DMT400004200,PGSC0003DMT400010431,PGSC0003DMT400011661,PGSC0003DMT400012208,PGSC0003DMT400016981,PGSC0003DMT400021622,PGSC0003DMT400023432,PGSC0003DMT400024400,PGSC0003DMT400062828,PGSC0003DMT400069333,PGSC0003DMT400076704,PGSC0003DMT400081785,PGSC0003DMT400081870	BP	0.04949	0.0499148	14	107
GO:0009967	positive regulation of signal transduction	PGSC0003DMT400026093,PGSC0003DMT400028812,PGSC0003DMT400033827,PGSC0003DMT400034618,PGSC0003DMT400037472,PGSC0003DMT400064306,PGSC0003DMT400069921	BP	0.04977	0.0498761	7	42
GO:0023056	positive regulation of signaling	PGSC0003DMT400026093,PGSC0003DMT400028812,PGSC0003DMT400033827,PGSC0003DMT400034618,PGSC0003DMT400037472,PGSC0003DMT400064306,PGSC0003DMT400069921	BP	0.04977	0.0498761	7	42
GO:0016168	chlorophyll binding	PGSC0003DMT400010985,PGSC0003DMT400021388,PGSC0003DMT400021389,PGSC0003DMT400021390,PGSC0003DMT400021391,PGSC0003DMT400021392,PGSC0003DMT400021422,PGSC0003DMT400022072,PGSC0003DMT400022987,PGSC0003DMT400032790,PGSC0003DMT400034896,PGSC0003DMT400034897,PGSC0003DMT400034899,PGSC0003DMT400034902,PGSC0003DMT400035006,PGSC0003DMT400035007,PGSC0003DMT400043054,PGSC0003DMT400049550,PGSC0003DMT400050232,…	MF	1.2e-13	4.68e-12	25	54
GO:0046906	tetrapyrrole binding	PGSC0003DMT400010985,PGSC0003DMT400021388,PGSC0003DMT400021389,PGSC0003DMT400021390,PGSC0003DMT400021391,PGSC0003DMT400021392,PGSC0003DMT400021422,PGSC0003DMT400022072,PGSC0003DMT400022987,PGSC0003DMT400032790,PGSC0003DMT400034896,PGSC0003DMT400034897,PGSC0003DMT400034899,PGSC0003DMT400034902,PGSC0003DMT400035006,PGSC0003DMT400035007,PGSC0003DMT400043054,PGSC0003DMT400049550,PGSC0003DMT400050232,…	MF	3.3e-13	6.435e-12	25	56
GO:0048037	cofactor binding	PGSC0003DMT400006974,PGSC0003DMT400009175,PGSC0003DMT400010985,PGSC0003DMT400011522,PGSC0003DMT400017594,PGSC0003DMT400021388,PGSC0003DMT400021389,PGSC0003DMT400021390,PGSC0003DMT400021391,PGSC0003DMT400021392,PGSC0003DMT400021422,PGSC0003DMT400022039,PGSC0003DMT400022072,PGSC0003DMT400022987,PGSC0003DMT400026671,PGSC0003DMT400032790,PGSC0003DMT400034896,PGSC0003DMT400034897,PGSC0003DMT400034899,…	MF	1.8e-05	0.000234	41	250
GO:0004842	ubiquitin-protein transferase activity	PGSC0003DMT400015306,PGSC0003DMT400028812,PGSC0003DMT400034706,PGSC0003DMT400036075,PGSC0003DMT400044280,PGSC0003DMT400054947,PGSC0003DMT400054948,PGSC0003DMT400054949,PGSC0003DMT400055045,PGSC0003DMT400055049,PGSC0003DMT400055050,PGSC0003DMT400063955	MF	2e-05	0.000195	12	36
GO:0019787	ubiquitin-like protein transferase activity	PGSC0003DMT400015306,PGSC0003DMT400028812,PGSC0003DMT400034706,PGSC0003DMT400036075,PGSC0003DMT400044280,PGSC0003DMT400054947,PGSC0003DMT400054948,PGSC0003DMT400054949,PGSC0003DMT400055045,PGSC0003DMT400055049,PGSC0003DMT400055050,PGSC0003DMT400063955	MF	4.8e-05	0.0003744	12	39
GO:0003743	translation initiation factor activity	PGSC0003DMT400004200,PGSC0003DMT400007325,PGSC0003DMT400011661,PGSC0003DMT400019783,PGSC0003DMT400019914,PGSC0003DMT400034911,PGSC0003DMT400043056,PGSC0003DMT400049575,PGSC0003DMT400060836,PGSC0003DMT400063132,PGSC0003DMT400076704,PGSC0003DMT400078293	MF	0.00053	0.003445	12	49
GO:0016151	nickel cation binding	PGSC0003DMT400018798,PGSC0003DMT400023336,PGSC0003DMT400025712	MF	0.00057	0.00317571	3	3
GO:0005507	copper ion binding	PGSC0003DMT400015784,PGSC0003DMT400018798,PGSC0003DMT400023336,PGSC0003DMT400025712	MF	0.00062	0.0030225	4	6
GO:0004364	glutathione transferase activity	PGSC0003DMT400005532,PGSC0003DMT400005546,PGSC0003DMT400005547,PGSC0003DMT400005549,PGSC0003DMT400005557,PGSC0003DMT400005558,PGSC0003DMT400005561,PGSC0003DMT400005571,PGSC0003DMT400020098,PGSC0003DMT400028619,PGSC0003DMT400038054,PGSC0003DMT400043105,PGSC0003DMT400079841	MF	0.00065	0.00281667	13	57
GO:0016987	sigma factor activity	PGSC0003DMT400023432,PGSC0003DMT400065483,PGSC0003DMT400069555,PGSC0003DMT400079883	MF	0.00136	0.005304	4	7
GO:0016765	transferase activity, transferring alkyl or aryl (other than methyl) groups	PGSC0003DMT400005532,PGSC0003DMT400005546,PGSC0003DMT400005547,PGSC0003DMT400005549,PGSC0003DMT400005557,PGSC0003DMT400005558,PGSC0003DMT400005561,PGSC0003DMT400005571,PGSC0003DMT400014493,PGSC0003DMT400016646,PGSC0003DMT400018242,PGSC0003DMT400020098,PGSC0003DMT400028619,PGSC0003DMT400038054,PGSC0003DMT400040485,PGSC0003DMT400043105,PGSC0003DMT400061846,PGSC0003DMT400069166,PGSC0003DMT400069476,…	MF	0.00148	0.00524727	20	117
GO:0004661	protein geranylgeranyltransferase activity	PGSC0003DMT400014493,PGSC0003DMT400069166,PGSC0003DMT400069476	MF	0.00216	0.00702	3	4
GO:0005488	binding	PGSC0003DMT400000186,PGSC0003DMT400000192,PGSC0003DMT400000266,PGSC0003DMT400000536,PGSC0003DMT400000546,PGSC0003DMT400000547,PGSC0003DMT400000917,PGSC0003DMT400000946,PGSC0003DMT400000985,PGSC0003DMT400001350,PGSC0003DMT400001354,PGSC0003DMT400001417,PGSC0003DMT400001542,PGSC0003DMT400001661,PGSC0003DMT400001746,PGSC0003DMT400001821,PGSC0003DMT400002312,PGSC0003DMT400002341,PGSC0003DMT400002375,…	MF	0.00235	0.00705	597	6741
GO:0047893	flavonol 3-O-glucosyltransferase activity	PGSC0003DMT400034122,PGSC0003DMT400063297,PGSC0003DMT400066567,PGSC0003DMT400066569	MF	0.00254	0.006604	4	8
GO:0102360	daphnetin 3-O-glucosyltransferase activity	PGSC0003DMT400034122,PGSC0003DMT400063297,PGSC0003DMT400066567,PGSC0003DMT400066569	MF	0.00254	0.006604	4	8
GO:0102425	myricetin 3-O-glucosyltransferase activity	PGSC0003DMT400034122,PGSC0003DMT400063297,PGSC0003DMT400066567,PGSC0003DMT400066569	MF	0.00254	0.006604	4	8
GO:0046872	metal ion binding	PGSC0003DMT400000536,PGSC0003DMT400001350,PGSC0003DMT400001354,PGSC0003DMT400002341,PGSC0003DMT400002555,PGSC0003DMT400003274,PGSC0003DMT400004360,PGSC0003DMT400004695,PGSC0003DMT400004981,PGSC0003DMT400004999,PGSC0003DMT400005512,PGSC0003DMT400006421,PGSC0003DMT400006927,PGSC0003DMT400006974,PGSC0003DMT400007173,PGSC0003DMT400007736,PGSC0003DMT400007737,PGSC0003DMT400008044,PGSC0003DMT400009175,…	MF	0.0026	0.00596471	248	2565
GO:0043169	cation binding	PGSC0003DMT400000536,PGSC0003DMT400001350,PGSC0003DMT400001354,PGSC0003DMT400002341,PGSC0003DMT400002555,PGSC0003DMT400003274,PGSC0003DMT400004360,PGSC0003DMT400004695,PGSC0003DMT400004981,PGSC0003DMT400004999,PGSC0003DMT400005512,PGSC0003DMT400006421,PGSC0003DMT400006927,PGSC0003DMT400006974,PGSC0003DMT400007173,PGSC0003DMT400007736,PGSC0003DMT400007737,PGSC0003DMT400008044,PGSC0003DMT400009175,…	MF	0.00266	0.00576333	248	2566
GO:0045735	nutrient reservoir activity	PGSC0003DMT400008264,PGSC0003DMT400020425,PGSC0003DMT400036586,PGSC0003DMT400044046,PGSC0003DMT400044055,PGSC0003DMT400075172	MF	0.00344	0.00706105	6	19
GO:0050366	tyramine N-feruloyltransferase activity	PGSC0003DMT400038285,PGSC0003DMT400038286,PGSC0003DMT400038291,PGSC0003DMT400038293	MF	0.00427	0.0083265	4	9
GO:0008318	protein prenyltransferase activity	PGSC0003DMT400014493,PGSC0003DMT400069166,PGSC0003DMT400069476	MF	0.00506	0.00939714	3	5
GO:0016984	ribulose-bisphosphate carboxylase activity	PGSC0003DMT400032975,PGSC0003DMT400050381,PGSC0003DMT400062138	MF	0.00949	0.0168232	3	6
GO:0008143	poly(A) binding	PGSC0003DMT400013036,PGSC0003DMT400029379,PGSC0003DMT400057203	MF	0.01558	0.0258562	3	7
GO:0070717	poly-purine tract binding	PGSC0003DMT400013036,PGSC0003DMT400029379,PGSC0003DMT400057203	MF	0.01558	0.0258562	3	7
GO:0008135	translation factor activity, RNA binding	PGSC0003DMT400004200,PGSC0003DMT400007325,PGSC0003DMT400011661,PGSC0003DMT400019783,PGSC0003DMT400019914,PGSC0003DMT400034911,PGSC0003DMT400043056,PGSC0003DMT400049575,PGSC0003DMT400060836,PGSC0003DMT400063132,PGSC0003DMT400076704,PGSC0003DMT400078293	MF	0.01664	0.0259584	12	73
GO:0009881	photoreceptor activity	PGSC0003DMT400022039,PGSC0003DMT400051416,PGSC0003DMT400065251,PGSC0003DMT400068851	MF	0.01852	0.02778	4	13
GO:0004660	protein farnesyltransferase activity	PGSC0003DMT400069166,PGSC0003DMT400069476	MF	0.01961	0.0273139	2	3
GO:0004662	CAAX-protein geranylgeranyltransferase activity	PGSC0003DMT400069166,PGSC0003DMT400069476	MF	0.01961	0.0273139	2	3
GO:0033743	peptide-methionine (R)-S-oxide reductase activity	PGSC0003DMT400018250,PGSC0003DMT400068883	MF	0.01961	0.0273139	2	3
GO:0003676	nucleic acid binding	PGSC0003DMT400000266,PGSC0003DMT400000546,PGSC0003DMT400000917,PGSC0003DMT400001661,PGSC0003DMT400001746,PGSC0003DMT400002375,PGSC0003DMT400002790,PGSC0003DMT400003796,PGSC0003DMT400004200,PGSC0003DMT400004369,PGSC0003DMT400005348,PGSC0003DMT400005836,PGSC0003DMT400006170,PGSC0003DMT400006421,PGSC0003DMT400006735,PGSC0003DMT400007325,PGSC0003DMT400007511,PGSC0003DMT400009493,PGSC0003DMT400010253,…	MF	0.01985	0.025805	180	1887
GO:0003723	RNA binding	PGSC0003DMT400000917,PGSC0003DMT400001746,PGSC0003DMT400004200,PGSC0003DMT400004369,PGSC0003DMT400005348,PGSC0003DMT400007325,PGSC0003DMT400010908,PGSC0003DMT400011022,PGSC0003DMT400011163,PGSC0003DMT400011661,PGSC0003DMT400012169,PGSC0003DMT400012431,PGSC0003DMT400013036,PGSC0003DMT400014381,PGSC0003DMT400015091,PGSC0003DMT400016981,PGSC0003DMT400017646,PGSC0003DMT400019783,PGSC0003DMT400019914,…	MF	0.03088	0.038849	60	568
GO:0003727	single-stranded RNA binding	PGSC0003DMT400013036,PGSC0003DMT400029379,PGSC0003DMT400057203	MF	0.03298	0.0401944	3	9
GO:0005515	protein binding	PGSC0003DMT400000192,PGSC0003DMT400000547,PGSC0003DMT400000985,PGSC0003DMT400001417,PGSC0003DMT400001542,PGSC0003DMT400001821,PGSC0003DMT400002312,PGSC0003DMT400003078,PGSC0003DMT400003274,PGSC0003DMT400004695,PGSC0003DMT400005759,PGSC0003DMT400006170,PGSC0003DMT400006680,PGSC0003DMT400008502,PGSC0003DMT400009493,PGSC0003DMT400009802,PGSC0003DMT400010253,PGSC0003DMT400010431,PGSC0003DMT400011022,…	MF	0.0331	0.0391182	147	1538
GO:0000224	peptide-N4-(N-acetyl-beta-glucosaminyl)asparagine amidase activity	PGSC0003DMT400050079,PGSC0003DMT400054788	MF	0.03706	0.0412954	2	4
GO:0004421	hydroxymethylglutaryl-CoA synthase activity	PGSC0003DMT400010866,PGSC0003DMT400032619	MF	0.03706	0.0412954	2	4
GO:0046481	digalactosyldiacylglycerol synthase activity	PGSC0003DMT400000446,PGSC0003DMT400072563	MF	0.03706	0.0412954	2	4
GO:0004659	prenyltransferase activity	PGSC0003DMT400014493,PGSC0003DMT400040485,PGSC0003DMT400061846,PGSC0003DMT400069166,PGSC0003DMT400069476	MF	0.03765	0.0396851	5	23
GO:0051765	inositol tetrakisphosphate kinase activity	PGSC0003DMT400012721,PGSC0003DMT400036899,PGSC0003DMT400096204	MF	0.04426	0.0448348	3	10
GO:0051766	inositol trisphosphate kinase activity	PGSC0003DMT400012721,PGSC0003DMT400036899,PGSC0003DMT400096204	MF	0.04426	0.0448348	3	10
GO:0009521	photosystem	PGSC0003DMT400005977,PGSC0003DMT400010985,PGSC0003DMT400011811,PGSC0003DMT400014861,PGSC0003DMT400021388,PGSC0003DMT400021389,PGSC0003DMT400021390,PGSC0003DMT400021391,PGSC0003DMT400021392,PGSC0003DMT400021422,PGSC0003DMT400022072,PGSC0003DMT400022987,PGSC0003DMT400026009,PGSC0003DMT400032790,PGSC0003DMT400034896,PGSC0003DMT400034897,PGSC0003DMT400034899,PGSC0003DMT400034902,PGSC0003DMT400035006,…	CC	7.4e-23	3.774e-21	41	84
GO:0009523	photosystem II	PGSC0003DMT400005977,PGSC0003DMT400010985,PGSC0003DMT400011811,PGSC0003DMT400021388,PGSC0003DMT400021389,PGSC0003DMT400021390,PGSC0003DMT400021391,PGSC0003DMT400021392,PGSC0003DMT400021422,PGSC0003DMT400022072,PGSC0003DMT400022987,PGSC0003DMT400026009,PGSC0003DMT400032790,PGSC0003DMT400034896,PGSC0003DMT400034897,PGSC0003DMT400034899,PGSC0003DMT400034902,PGSC0003DMT400035006,PGSC0003DMT400035007,…	CC	3.9e-20	9.945e-19	34	66
GO:0009522	photosystem I	PGSC0003DMT400010985,PGSC0003DMT400014861,PGSC0003DMT400021388,PGSC0003DMT400021389,PGSC0003DMT400021390,PGSC0003DMT400021391,PGSC0003DMT400021392,PGSC0003DMT400021422,PGSC0003DMT400022072,PGSC0003DMT400034896,PGSC0003DMT400034897,PGSC0003DMT400034899,PGSC0003DMT400034902,PGSC0003DMT400035006,PGSC0003DMT400035007,PGSC0003DMT400043054,PGSC0003DMT400049550,PGSC0003DMT400050232,PGSC0003DMT400051932,…	CC	2.9e-19	4.93e-18	29	50
GO:0009579	thylakoid	PGSC0003DMT400000589,PGSC0003DMT400001064,PGSC0003DMT400001417,PGSC0003DMT400002341,PGSC0003DMT400002877,PGSC0003DMT400005977,PGSC0003DMT400008502,PGSC0003DMT400010985,PGSC0003DMT400011811,PGSC0003DMT400012215,PGSC0003DMT400014565,PGSC0003DMT400014861,PGSC0003DMT400017717,PGSC0003DMT400021388,PGSC0003DMT400021389,PGSC0003DMT400021390,PGSC0003DMT400021391,PGSC0003DMT400021392,PGSC0003DMT400021422,…	CC	4.5e-19	5.7375e-18	72	280
GO:0044436	thylakoid part	PGSC0003DMT400000589,PGSC0003DMT400001064,PGSC0003DMT400001417,PGSC0003DMT400002341,PGSC0003DMT400002877,PGSC0003DMT400005977,PGSC0003DMT400008502,PGSC0003DMT400010985,PGSC0003DMT400011811,PGSC0003DMT400012215,PGSC0003DMT400014861,PGSC0003DMT400017717,PGSC0003DMT400021388,PGSC0003DMT400021389,PGSC0003DMT400021390,PGSC0003DMT400021391,PGSC0003DMT400021392,PGSC0003DMT400021422,PGSC0003DMT400022072,…	CC	7.9e-19	8.058e-18	69	263
GO:0034357	photosynthetic membrane	PGSC0003DMT400000589,PGSC0003DMT400001064,PGSC0003DMT400001417,PGSC0003DMT400002341,PGSC0003DMT400002877,PGSC0003DMT400005977,PGSC0003DMT400008502,PGSC0003DMT400010985,PGSC0003DMT400011811,PGSC0003DMT400014861,PGSC0003DMT400021388,PGSC0003DMT400021389,PGSC0003DMT400021390,PGSC0003DMT400021391,PGSC0003DMT400021392,PGSC0003DMT400021422,PGSC0003DMT400022072,PGSC0003DMT400022987,PGSC0003DMT400026009,…	CC	1.1e-18	9.35e-18	61	214
GO:0009534	chloroplast thylakoid	PGSC0003DMT400000589,PGSC0003DMT400001064,PGSC0003DMT400001417,PGSC0003DMT400002341,PGSC0003DMT400002877,PGSC0003DMT400005977,PGSC0003DMT400008502,PGSC0003DMT400010985,PGSC0003DMT400011811,PGSC0003DMT400012215,PGSC0003DMT400014565,PGSC0003DMT400014861,PGSC0003DMT400017717,PGSC0003DMT400021388,PGSC0003DMT400021389,PGSC0003DMT400021390,PGSC0003DMT400021391,PGSC0003DMT400021392,PGSC0003DMT400021422,…	CC	4.2e-17	2.856e-16	68	275
GO:0031976	plastid thylakoid	PGSC0003DMT400000589,PGSC0003DMT400001064,PGSC0003DMT400001417,PGSC0003DMT400002341,PGSC0003DMT400002877,PGSC0003DMT400005977,PGSC0003DMT400008502,PGSC0003DMT400010985,PGSC0003DMT400011811,PGSC0003DMT400012215,PGSC0003DMT400014565,PGSC0003DMT400014861,PGSC0003DMT400017717,PGSC0003DMT400021388,PGSC0003DMT400021389,PGSC0003DMT400021390,PGSC0003DMT400021391,PGSC0003DMT400021392,PGSC0003DMT400021422,…	CC	4.2e-17	2.856e-16	68	275
GO:0009535	chloroplast thylakoid membrane	PGSC0003DMT400000589,PGSC0003DMT400001064,PGSC0003DMT400001417,PGSC0003DMT400002341,PGSC0003DMT400002877,PGSC0003DMT400005977,PGSC0003DMT400008502,PGSC0003DMT400010985,PGSC0003DMT400011811,PGSC0003DMT400014861,PGSC0003DMT400021388,PGSC0003DMT400021389,PGSC0003DMT400021390,PGSC0003DMT400021391,PGSC0003DMT400021392,PGSC0003DMT400021422,PGSC0003DMT400022072,PGSC0003DMT400022987,PGSC0003DMT400026009,…	CC	5.2e-17	2.652e-16	58	211
GO:0042651	thylakoid membrane	PGSC0003DMT400000589,PGSC0003DMT400001064,PGSC0003DMT400001417,PGSC0003DMT400002341,PGSC0003DMT400002877,PGSC0003DMT400005977,PGSC0003DMT400008502,PGSC0003DMT400010985,PGSC0003DMT400011811,PGSC0003DMT400014861,PGSC0003DMT400021388,PGSC0003DMT400021389,PGSC0003DMT400021390,PGSC0003DMT400021391,PGSC0003DMT400021392,PGSC0003DMT400021422,PGSC0003DMT400022072,PGSC0003DMT400022987,PGSC0003DMT400026009,…	CC	5.2e-17	2.652e-16	58	211
GO:0055035	plastid thylakoid membrane	PGSC0003DMT400000589,PGSC0003DMT400001064,PGSC0003DMT400001417,PGSC0003DMT400002341,PGSC0003DMT400002877,PGSC0003DMT400005977,PGSC0003DMT400008502,PGSC0003DMT400010985,PGSC0003DMT400011811,PGSC0003DMT400014861,PGSC0003DMT400021388,PGSC0003DMT400021389,PGSC0003DMT400021390,PGSC0003DMT400021391,PGSC0003DMT400021392,PGSC0003DMT400021422,PGSC0003DMT400022072,PGSC0003DMT400022987,PGSC0003DMT400026009,…	CC	5.2e-17	2.652e-16	58	211
GO:0044434	chloroplast part	PGSC0003DMT400000446,PGSC0003DMT400000589,PGSC0003DMT400001064,PGSC0003DMT400001417,PGSC0003DMT400001542,PGSC0003DMT400001709,PGSC0003DMT400002341,PGSC0003DMT400002877,PGSC0003DMT400003274,PGSC0003DMT400003958,PGSC0003DMT400004369,PGSC0003DMT400004981,PGSC0003DMT400005977,PGSC0003DMT400008103,PGSC0003DMT400008264,PGSC0003DMT400008502,PGSC0003DMT400010985,PGSC0003DMT400011811,PGSC0003DMT400012215,…	CC	6e-17	2.55e-16	123	697
GO:0044435	plastid part	PGSC0003DMT400000446,PGSC0003DMT400000589,PGSC0003DMT400001064,PGSC0003DMT400001417,PGSC0003DMT400001542,PGSC0003DMT400001709,PGSC0003DMT400002341,PGSC0003DMT400002877,PGSC0003DMT400003274,PGSC0003DMT400003958,PGSC0003DMT400004369,PGSC0003DMT400004981,PGSC0003DMT400005977,PGSC0003DMT400008103,PGSC0003DMT400008264,PGSC0003DMT400008502,PGSC0003DMT400010985,PGSC0003DMT400011811,PGSC0003DMT400012215,…	CC	1.2e-16	4.70769e-16	123	703
GO:0098796	membrane protein complex	PGSC0003DMT400005977,PGSC0003DMT400010985,PGSC0003DMT400011811,PGSC0003DMT400014861,PGSC0003DMT400021388,PGSC0003DMT400021389,PGSC0003DMT400021390,PGSC0003DMT400021391,PGSC0003DMT400021392,PGSC0003DMT400021422,PGSC0003DMT400022072,PGSC0003DMT400022987,PGSC0003DMT400026009,PGSC0003DMT400032790,PGSC0003DMT400034896,PGSC0003DMT400034897,PGSC0003DMT400034899,PGSC0003DMT400034902,PGSC0003DMT400035006,…	CC	8.2e-16	2.98714e-15	47	155
GO:0009507	chloroplast	PGSC0003DMT400000446,PGSC0003DMT400000447,PGSC0003DMT400000589,PGSC0003DMT400000946,PGSC0003DMT400001064,PGSC0003DMT400001417,PGSC0003DMT400001470,PGSC0003DMT400001542,PGSC0003DMT400001646,PGSC0003DMT400001709,PGSC0003DMT400002341,PGSC0003DMT400002555,PGSC0003DMT400002558,PGSC0003DMT400002866,PGSC0003DMT400002877,PGSC0003DMT400002933,PGSC0003DMT400003274,PGSC0003DMT400003288,PGSC0003DMT400003958,…	CC	1.3e-15	4.42e-15	204	1468
GO:0009536	plastid	PGSC0003DMT400000446,PGSC0003DMT400000447,PGSC0003DMT400000589,PGSC0003DMT400000946,PGSC0003DMT400001064,PGSC0003DMT400001417,PGSC0003DMT400001470,PGSC0003DMT400001542,PGSC0003DMT400001646,PGSC0003DMT400001709,PGSC0003DMT400002341,PGSC0003DMT400002555,PGSC0003DMT400002558,PGSC0003DMT400002866,PGSC0003DMT400002877,PGSC0003DMT400002933,PGSC0003DMT400003274,PGSC0003DMT400003288,PGSC0003DMT400003958,…	CC	2.3e-15	7.33125e-15	204	1476
GO:0005622	intracellular	PGSC0003DMT400000192,PGSC0003DMT400000266,PGSC0003DMT400000295,PGSC0003DMT400000365,PGSC0003DMT400000446,PGSC0003DMT400000447,PGSC0003DMT400000546,PGSC0003DMT400000547,PGSC0003DMT400000568,PGSC0003DMT400000589,PGSC0003DMT400000747,PGSC0003DMT400000859,PGSC0003DMT400000917,PGSC0003DMT400000946,PGSC0003DMT400000985,PGSC0003DMT400001064,PGSC0003DMT400001417,PGSC0003DMT400001470,PGSC0003DMT400001542,…	CC	1.5e-11	4.37143e-11	694	7442
GO:0044424	intracellular part	PGSC0003DMT400000192,PGSC0003DMT400000266,PGSC0003DMT400000295,PGSC0003DMT400000365,PGSC0003DMT400000446,PGSC0003DMT400000447,PGSC0003DMT400000546,PGSC0003DMT400000547,PGSC0003DMT400000568,PGSC0003DMT400000589,PGSC0003DMT400000747,PGSC0003DMT400000859,PGSC0003DMT400000917,PGSC0003DMT400000946,PGSC0003DMT400000985,PGSC0003DMT400001064,PGSC0003DMT400001417,PGSC0003DMT400001470,PGSC0003DMT400001542,…	CC	1.5e-11	4.37143e-11	694	7442
GO:0043227	membrane-bounded organelle	PGSC0003DMT400000192,PGSC0003DMT400000266,PGSC0003DMT400000295,PGSC0003DMT400000365,PGSC0003DMT400000446,PGSC0003DMT400000447,PGSC0003DMT400000546,PGSC0003DMT400000547,PGSC0003DMT400000568,PGSC0003DMT400000589,PGSC0003DMT400000747,PGSC0003DMT400000859,PGSC0003DMT400000917,PGSC0003DMT400000946,PGSC0003DMT400000985,PGSC0003DMT400001064,PGSC0003DMT400001417,PGSC0003DMT400001470,PGSC0003DMT400001542,…	CC	2.6e-09	6.97895e-09	590	6200
GO:0043231	intracellular membrane-bounded organelle	PGSC0003DMT400000192,PGSC0003DMT400000266,PGSC0003DMT400000295,PGSC0003DMT400000365,PGSC0003DMT400000446,PGSC0003DMT400000447,PGSC0003DMT400000546,PGSC0003DMT400000547,PGSC0003DMT400000568,PGSC0003DMT400000589,PGSC0003DMT400000747,PGSC0003DMT400000859,PGSC0003DMT400000917,PGSC0003DMT400000946,PGSC0003DMT400000985,PGSC0003DMT400001064,PGSC0003DMT400001417,PGSC0003DMT400001470,PGSC0003DMT400001542,…	CC	4.2e-09	1.071e-08	580	6086
GO:0032991	protein-containing complex	PGSC0003DMT400000568,PGSC0003DMT400000859,PGSC0003DMT400001746,PGSC0003DMT400002536,PGSC0003DMT400003274,PGSC0003DMT400004200,PGSC0003DMT400005977,PGSC0003DMT400006581,PGSC0003DMT400006681,PGSC0003DMT400010431,PGSC0003DMT400010908,PGSC0003DMT400010985,PGSC0003DMT400011661,PGSC0003DMT400011811,PGSC0003DMT400012169,PGSC0003DMT400013052,PGSC0003DMT400014351,PGSC0003DMT400014381,PGSC0003DMT400014424,…	CC	1.2e-08	2.91429e-08	121	893
GO:0043226	organelle	PGSC0003DMT400000192,PGSC0003DMT400000266,PGSC0003DMT400000295,PGSC0003DMT400000365,PGSC0003DMT400000446,PGSC0003DMT400000447,PGSC0003DMT400000546,PGSC0003DMT400000547,PGSC0003DMT400000568,PGSC0003DMT400000589,PGSC0003DMT400000747,PGSC0003DMT400000859,PGSC0003DMT400000917,PGSC0003DMT400000946,PGSC0003DMT400000985,PGSC0003DMT400001064,PGSC0003DMT400001417,PGSC0003DMT400001470,PGSC0003DMT400001542,…	CC	1e-07	2.31818e-07	615	6629
GO:0043229	intracellular organelle	PGSC0003DMT400000192,PGSC0003DMT400000266,PGSC0003DMT400000295,PGSC0003DMT400000365,PGSC0003DMT400000446,PGSC0003DMT400000447,PGSC0003DMT400000546,PGSC0003DMT400000547,PGSC0003DMT400000568,PGSC0003DMT400000589,PGSC0003DMT400000747,PGSC0003DMT400000859,PGSC0003DMT400000917,PGSC0003DMT400000946,PGSC0003DMT400000985,PGSC0003DMT400001064,PGSC0003DMT400001417,PGSC0003DMT400001470,PGSC0003DMT400001542,…	CC	1.4e-07	3.10435e-07	614	6627
GO:0005623	cell	PGSC0003DMT400000192,PGSC0003DMT400000266,PGSC0003DMT400000295,PGSC0003DMT400000365,PGSC0003DMT400000446,PGSC0003DMT400000447,PGSC0003DMT400000536,PGSC0003DMT400000546,PGSC0003DMT400000547,PGSC0003DMT400000568,PGSC0003DMT400000589,PGSC0003DMT400000747,PGSC0003DMT400000859,PGSC0003DMT400000917,PGSC0003DMT400000946,PGSC0003DMT400000985,PGSC0003DMT400001064,PGSC0003DMT400001417,PGSC0003DMT400001470,…	CC	3.2e-07	6.66122e-07	760	8618
GO:0044464	cell part	PGSC0003DMT400000192,PGSC0003DMT400000266,PGSC0003DMT400000295,PGSC0003DMT400000365,PGSC0003DMT400000446,PGSC0003DMT400000447,PGSC0003DMT400000536,PGSC0003DMT400000546,PGSC0003DMT400000547,PGSC0003DMT400000568,PGSC0003DMT400000589,PGSC0003DMT400000747,PGSC0003DMT400000859,PGSC0003DMT400000917,PGSC0003DMT400000946,PGSC0003DMT400000985,PGSC0003DMT400001064,PGSC0003DMT400001417,PGSC0003DMT400001470,…	CC	3.2e-07	6.66122e-07	760	8618
GO:0005634	nucleus	PGSC0003DMT400000192,PGSC0003DMT400000266,PGSC0003DMT400000365,PGSC0003DMT400000546,PGSC0003DMT400000568,PGSC0003DMT400000859,PGSC0003DMT400000917,PGSC0003DMT400000985,PGSC0003DMT400001661,PGSC0003DMT400001746,PGSC0003DMT400001821,PGSC0003DMT400002192,PGSC0003DMT400002375,PGSC0003DMT400002790,PGSC0003DMT400003078,PGSC0003DMT400003784,PGSC0003DMT400003796,PGSC0003DMT400004130,PGSC0003DMT400004695,…	CC	5.1e-05	0.000100038	277	2764
GO:0005737	cytoplasm	PGSC0003DMT400000192,PGSC0003DMT400000295,PGSC0003DMT400000365,PGSC0003DMT400000446,PGSC0003DMT400000447,PGSC0003DMT400000547,PGSC0003DMT400000589,PGSC0003DMT400000747,PGSC0003DMT400000946,PGSC0003DMT400001064,PGSC0003DMT400001417,PGSC0003DMT400001470,PGSC0003DMT400001542,PGSC0003DMT400001646,PGSC0003DMT400001709,PGSC0003DMT400002341,PGSC0003DMT400002449,PGSC0003DMT400002536,PGSC0003DMT400002555,…	CC	0.00052	0.000982222	479	5255
GO:0016604	nuclear body	PGSC0003DMT400002192,PGSC0003DMT400010908,PGSC0003DMT400012169,PGSC0003DMT400022039,PGSC0003DMT400029666,PGSC0003DMT400033081,PGSC0003DMT400045694,PGSC0003DMT400046635,PGSC0003DMT400055636,PGSC0003DMT400058471,PGSC0003DMT400059978,PGSC0003DMT400078022,PGSC0003DMT400090250	CC	0.00185	0.00336964	13	64
GO:0009570	chloroplast stroma	PGSC0003DMT400000589,PGSC0003DMT400002877,PGSC0003DMT400003274,PGSC0003DMT400004369,PGSC0003DMT400004981,PGSC0003DMT400008103,PGSC0003DMT400012249,PGSC0003DMT400014351,PGSC0003DMT400020910,PGSC0003DMT400025881,PGSC0003DMT400028767,PGSC0003DMT400030248,PGSC0003DMT400033560,PGSC0003DMT400036349,PGSC0003DMT400037299,PGSC0003DMT400038349,PGSC0003DMT400038371,PGSC0003DMT400039332,PGSC0003DMT400039743,…	CC	0.00247	0.00434379	31	222
GO:0044444	cytoplasmic part	PGSC0003DMT400000192,PGSC0003DMT400000295,PGSC0003DMT400000446,PGSC0003DMT400000447,PGSC0003DMT400000547,PGSC0003DMT400000589,PGSC0003DMT400000747,PGSC0003DMT400000946,PGSC0003DMT400001064,PGSC0003DMT400001417,PGSC0003DMT400001470,PGSC0003DMT400001542,PGSC0003DMT400001646,PGSC0003DMT400001709,PGSC0003DMT400002341,PGSC0003DMT400002449,PGSC0003DMT400002536,PGSC0003DMT400002555,PGSC0003DMT400002558,…	CC	0.00255	0.004335	370	4022
GO:0009532	plastid stroma	PGSC0003DMT400000589,PGSC0003DMT400002877,PGSC0003DMT400003274,PGSC0003DMT400004369,PGSC0003DMT400004981,PGSC0003DMT400008103,PGSC0003DMT400012249,PGSC0003DMT400014351,PGSC0003DMT400020910,PGSC0003DMT400025881,PGSC0003DMT400028767,PGSC0003DMT400030248,PGSC0003DMT400033560,PGSC0003DMT400036349,PGSC0003DMT400037299,PGSC0003DMT400038349,PGSC0003DMT400038371,PGSC0003DMT400039332,PGSC0003DMT400039743,…	CC	0.00284	0.00467226	31	224
GO:0005681	spliceosomal complex	PGSC0003DMT400000568,PGSC0003DMT400010908,PGSC0003DMT400012169,PGSC0003DMT400014424,PGSC0003DMT400018531,PGSC0003DMT400029666,PGSC0003DMT400033081,PGSC0003DMT400044280,PGSC0003DMT400045694,PGSC0003DMT400055636,PGSC0003DMT400060729,PGSC0003DMT400063604,PGSC0003DMT400078022,PGSC0003DMT400078069,PGSC0003DMT400084916,PGSC0003DMT400090250	CC	0.00285	0.00454219	16	91
GO:0031969	chloroplast membrane	PGSC0003DMT400000446,PGSC0003DMT400001542,PGSC0003DMT400001709,PGSC0003DMT400003958,PGSC0003DMT400008264,PGSC0003DMT400013477,PGSC0003DMT400016494,PGSC0003DMT400020425,PGSC0003DMT400022514,PGSC0003DMT400022863,PGSC0003DMT400025632,PGSC0003DMT400025881,PGSC0003DMT400029640,PGSC0003DMT400031722,PGSC0003DMT400036942,PGSC0003DMT400038588,PGSC0003DMT400048315,PGSC0003DMT400057281,PGSC0003DMT400060462,…	CC	0.00349	0.00539364	31	227
GO:0009526	plastid envelope	PGSC0003DMT400000446,PGSC0003DMT400001542,PGSC0003DMT400001709,PGSC0003DMT400003958,PGSC0003DMT400008264,PGSC0003DMT400013477,PGSC0003DMT400016494,PGSC0003DMT400020425,PGSC0003DMT400022514,PGSC0003DMT400022863,PGSC0003DMT400025632,PGSC0003DMT400025881,PGSC0003DMT400029640,PGSC0003DMT400031722,PGSC0003DMT400033560,PGSC0003DMT400036942,PGSC0003DMT400037299,PGSC0003DMT400038588,PGSC0003DMT400048315,…	CC	0.0035	0.00525	33	246
GO:0042170	plastid membrane	PGSC0003DMT400000446,PGSC0003DMT400001542,PGSC0003DMT400001709,PGSC0003DMT400003958,PGSC0003DMT400008264,PGSC0003DMT400013477,PGSC0003DMT400016494,PGSC0003DMT400020425,PGSC0003DMT400022514,PGSC0003DMT400022863,PGSC0003DMT400025632,PGSC0003DMT400025881,PGSC0003DMT400029640,PGSC0003DMT400031722,PGSC0003DMT400036942,PGSC0003DMT400038588,PGSC0003DMT400048315,PGSC0003DMT400057281,PGSC0003DMT400060462,…	CC	0.00398	0.00579943	31	229
GO:1990904	ribonucleoprotein complex	PGSC0003DMT400000568,PGSC0003DMT400001746,PGSC0003DMT400002536,PGSC0003DMT400003274,PGSC0003DMT400004200,PGSC0003DMT400006681,PGSC0003DMT400010431,PGSC0003DMT400010908,PGSC0003DMT400011661,PGSC0003DMT400012169,PGSC0003DMT400013052,PGSC0003DMT400014351,PGSC0003DMT400014381,PGSC0003DMT400014424,PGSC0003DMT400015074,PGSC0003DMT400017646,PGSC0003DMT400018531,PGSC0003DMT400018728,PGSC0003DMT400020315,…	CC	0.00465	0.0065875	51	429
GO:0009941	chloroplast envelope	PGSC0003DMT400000446,PGSC0003DMT400001542,PGSC0003DMT400001709,PGSC0003DMT400003958,PGSC0003DMT400008264,PGSC0003DMT400013477,PGSC0003DMT400016494,PGSC0003DMT400020425,PGSC0003DMT400022514,PGSC0003DMT400022863,PGSC0003DMT400025632,PGSC0003DMT400025881,PGSC0003DMT400029640,PGSC0003DMT400031722,PGSC0003DMT400036942,PGSC0003DMT400037299,PGSC0003DMT400038588,PGSC0003DMT400048315,PGSC0003DMT400057281,…	CC	0.00497	0.00685054	32	242
GO:0016607	nuclear speck	PGSC0003DMT400002192,PGSC0003DMT400010908,PGSC0003DMT400029666,PGSC0003DMT400033081,PGSC0003DMT400045694,PGSC0003DMT400046635,PGSC0003DMT400055636,PGSC0003DMT400059978,PGSC0003DMT400078022,PGSC0003DMT400090250	CC	0.00673	0.00903237	10	50
GO:0033588	Elongator holoenzyme complex	PGSC0003DMT400039303,PGSC0003DMT400065548,PGSC0003DMT400067888	CC	0.01512	0.0197723	3	7
GO:0044451	nucleoplasm part	PGSC0003DMT400000859,PGSC0003DMT400002192,PGSC0003DMT400010908,PGSC0003DMT400012169,PGSC0003DMT400017833,PGSC0003DMT400022039,PGSC0003DMT400029666,PGSC0003DMT400033081,PGSC0003DMT400045694,PGSC0003DMT400046635,PGSC0003DMT400055636,PGSC0003DMT400058471,PGSC0003DMT400059978,PGSC0003DMT400067536,PGSC0003DMT400077007,PGSC0003DMT400077392,PGSC0003DMT400078022,PGSC0003DMT400090250	CC	0.01593	0.0203107	18	127
GO:0005965	protein farnesyltransferase complex	PGSC0003DMT400069166,PGSC0003DMT400069476	CC	0.0192	0.0238829	2	3
GO:0005654	nucleoplasm	PGSC0003DMT400000859,PGSC0003DMT400002192,PGSC0003DMT400010908,PGSC0003DMT400012169,PGSC0003DMT400017833,PGSC0003DMT400022039,PGSC0003DMT400024400,PGSC0003DMT400025891,PGSC0003DMT400029666,PGSC0003DMT400033081,PGSC0003DMT400045694,PGSC0003DMT400046635,PGSC0003DMT400049444,PGSC0003DMT400055636,PGSC0003DMT400058471,PGSC0003DMT400059978,PGSC0003DMT400062828,PGSC0003DMT400064159,PGSC0003DMT400067536,…	CC	0.02405	0.0292036	23	181
GO:0010287	plastoglobule	PGSC0003DMT400000589,PGSC0003DMT400004981,PGSC0003DMT400008103,PGSC0003DMT400033560,PGSC0003DMT400036349,PGSC0003DMT400038371,PGSC0003DMT400039332	CC	0.02534	0.0300544	7	36
GO:0031984	organelle subcompartment	PGSC0003DMT400000589,PGSC0003DMT400000747,PGSC0003DMT400001064,PGSC0003DMT400001417,PGSC0003DMT400002341,PGSC0003DMT400002449,PGSC0003DMT400002877,PGSC0003DMT400003537,PGSC0003DMT400005977,PGSC0003DMT400006594,PGSC0003DMT400008502,PGSC0003DMT400010106,PGSC0003DMT400010985,PGSC0003DMT400011811,PGSC0003DMT400012215,PGSC0003DMT400013490,PGSC0003DMT400014565,PGSC0003DMT400014861,PGSC0003DMT400017717,…	CC	0.03086	0.0357695	102	1039
GO:0098552	side of membrane	PGSC0003DMT400001417,PGSC0003DMT400008264,PGSC0003DMT400020425	CC	0.03205	0.0363233	3	9
GO:0009898	cytoplasmic side of plasma membrane	PGSC0003DMT400008264,PGSC0003DMT400020425	CC	0.03631	0.0402567	2	4
GO:0009543	chloroplast thylakoid lumen	PGSC0003DMT400012215,PGSC0003DMT400017717,PGSC0003DMT400035271,PGSC0003DMT400048684,PGSC0003DMT400048706,PGSC0003DMT400063056,PGSC0003DMT400081870,PGSC0003DMT400084308	CC	0.0451	0.0484232	8	49
GO:0031978	plastid thylakoid lumen	PGSC0003DMT400012215,PGSC0003DMT400017717,PGSC0003DMT400035271,PGSC0003DMT400048684,PGSC0003DMT400048706,PGSC0003DMT400063056,PGSC0003DMT400081870,PGSC0003DMT400084308	CC	0.0451	0.0484232	8	49
GO:0005615	extracellular space	PGSC0003DMT400013465,PGSC0003DMT400027202,PGSC0003DMT400079159,PGSC0003DMT400079206,PGSC0003DMT400079207,PGSC0003DMT400079208,PGSC0003DMT400079209	CC	0.0479	0.0493515	7	41
GO:0044421	extracellular region part	PGSC0003DMT400013465,PGSC0003DMT400027202,PGSC0003DMT400079159,PGSC0003DMT400079206,PGSC0003DMT400079207,PGSC0003DMT400079208,PGSC0003DMT400079209	CC	0.0479	0.0493515	7	41
GO:0031977	thylakoid lumen	PGSC0003DMT400012215,PGSC0003DMT400017717,PGSC0003DMT400035271,PGSC0003DMT400048684,PGSC0003DMT400048706,PGSC0003DMT400063056,PGSC0003DMT400081870,PGSC0003DMT400084308	CC	0.04998	0.04998	8	50
