# Supplementary material for: Genome-Wide Identification and Characterization of Potato Long Non-coding RNAs Associated With Phytophthora infestans Resistance
Source: Front Plant Sci. 2021 Feb 10;12:619062. doi: 10.3389/fpls.2021.619062 (PMC7902931; doi:10.3389/fpls.2021.619062)
Supplement: Supplementary Table 12 — KEGG and GO enrichment analysis of specific DELs from P. infestans–infected samples in WT tissue. [file Table_12.XLSX]

## Sheet: KEGG
PathwayID	PathwayName	GenesName	S gene number	B gene number	Pvalue	Qvalue	PathwayLink
ko04141	Protein processing in endoplasmic reticulum	PGSC0003DMT400055958|PGSC0003DMT400063543|PGSC0003DMT400078007|PGSC0003DMT400021142|PGSC0003DMT400012249|PGSC0003DMT400007587|PGSC0003DMT400078006|PGSC0003DMT400056722|PGSC0003DMT400078008|PGSC0003DMT400089913|PGSC0003DMT400042449|PGSC0003DMT400032941|PGSC0003DMT400068727|PGSC0003DMT400060145|PGSC0003DMT400071311|PGSC0003DMT400063662|PGSC0003DMT400078202|PGSC0003DMT400078201|PGSC0003DMT400030387|…	31	245	7.83737e-07	0.00123023	http://www.genome.jp/kegg-bin/show_pathway?ko04141/K13525%09red/K09490%09red/K10575%09red/K09503%09red/K13989%09red/K03094%09red/K07953%09red/K10839%09red/K14009%09red/K13993%09red/K03347%09red
ko00196	Photosynthesis - antenna proteins	PGSC0003DMT400010985|PGSC0003DMT400034897|PGSC0003DMT400034896|PGSC0003DMT400034898|PGSC0003DMT400035006|PGSC0003DMT400021388|PGSC0003DMT400050232|PGSC0003DMT400034902|PGSC0003DMT400083158|PGSC0003DMT400022072|PGSC0003DMT400054836	11	37	1.15515e-06	0.00123023	http://www.genome.jp/kegg-bin/show_pathway?ko00196/K08914%09red/K08909%09red/K08910%09red/K08913%09red/K08912%09red
ko03040	Spliceosome	PGSC0003DMT400017726|PGSC0003DMT400078069|PGSC0003DMT400033081|PGSC0003DMT400045694|PGSC0003DMT400023075|PGSC0003DMT400014744|PGSC0003DMT400012873|PGSC0003DMT400054608|PGSC0003DMT400029670|PGSC0003DMT400021046|PGSC0003DMT400049444|PGSC0003DMT400068281|PGSC0003DMT400056561|PGSC0003DMT400042233|PGSC0003DMT400010908|PGSC0003DMT400084916|PGSC0003DMT400045629|PGSC0003DMT400022394|PGSC0003DMT400049840|…	23	191	2.19024e-05	0.0155507	http://www.genome.jp/kegg-bin/show_pathway?ko03040/K10599%09red/K12863%09red/K06063%09red/K12867%09red/K12844%09red/K12869%09red/K12840%09red/K12881%09red/K12885%09red/K12854%09red/K12662%09red/K11096%09red/K12815%09red/K11095%09red/K12818%09red/K12817%09red/K12900%09red/K12831%09red/K12873%09red/K12833%09red/K12872%09red/K12891%09red
ko00480	Glutathione metabolism	PGSC0003DMT400005571|PGSC0003DMT400038054|PGSC0003DMT400005558|PGSC0003DMT400028619|PGSC0003DMT400051375|PGSC0003DMT400005547|PGSC0003DMT400005546|PGSC0003DMT400043105|PGSC0003DMT400002341|PGSC0003DMT400005532|PGSC0003DMT400074054	11	107	0.0024535	0.593457	http://www.genome.jp/kegg-bin/show_pathway?ko00480/K00799%09red/K00434%09red
ko03420	Nucleotide excision repair	PGSC0003DMT400083292|PGSC0003DMT400064404|PGSC0003DMT400032941|PGSC0003DMT400017901|PGSC0003DMT400025613|PGSC0003DMT400071759|PGSC0003DMT400015483|PGSC0003DMT400078745|PGSC0003DMT400056773	9	83	0.00303586	0.646638	http://www.genome.jp/kegg-bin/show_pathway?ko03420/K03142%09red/K10840%09red/K10755%09red/K07466%09red/K10747%09red/K10839%09red/K10140%09red
ko03008	Ribosome biogenesis in eukaryotes	PGSC0003DMT400007150|PGSC0003DMT400001746|PGSC0003DMT400051944|PGSC0003DMT400014917|PGSC0003DMT400046254|PGSC0003DMT400077605|PGSC0003DMT400034496|PGSC0003DMT400061433|PGSC0003DMT400007765	9	92	0.00504405	0.734885	http://www.genome.jp/kegg-bin/show_pathway?ko03008/K07562%09red/K14564%09red/K14567%09red/K14539%09red/K14571%09red/K11883%09red/K11129%09red/K14538%09red/K06943%09red
ko03013	RNA transport	PGSC0003DMT400044186|PGSC0003DMT400013188|PGSC0003DMT400043056|PGSC0003DMT400049444|PGSC0003DMT400049575|PGSC0003DMT400078293|PGSC0003DMT400001775|PGSC0003DMT400034911|PGSC0003DMT400060836|PGSC0003DMT400011661|PGSC0003DMT400071626|PGSC0003DMT400034496|PGSC0003DMT400076704	13	155	0.00569223	0.734885	http://www.genome.jp/kegg-bin/show_pathway?ko03013/K07562%09red/K12881%09red/K12160%09red/K03238%09red/K03113%09red/K03262%09red/K03259%09red/K03247%09red/K03243%09red/K14291%09red/K03250%09red
ko00195	Photosynthesis	PGSC0003DMT400045248|PGSC0003DMT400011522|PGSC0003DMT400051899|PGSC0003DMT400063056|PGSC0003DMT400054480|PGSC0003DMT400043672	6	65	0.00701725	0.734885	http://www.genome.jp/kegg-bin/show_pathway?ko00195/K02694%09red/K02113%09red/K03542%09red/K02717%09red/K02639%09red/K02721%09red
ko00920	Sulfur metabolism	PGSC0003DMT400016646|PGSC0003DMT400052064|PGSC0003DMT400057095|PGSC0003DMT400000764	4	30	0.00757289	0.734885	http://www.genome.jp/kegg-bin/show_pathway?ko00920/K13034%09red/K00387%09red/K00640%09red
ko04075	Plant hormone signal transduction	PGSC0003DMT400049446|PGSC0003DMT400049448|PGSC0003DMT400011470|PGSC0003DMT400060922|PGSC0003DMT400004063|PGSC0003DMT400009439|PGSC0003DMT400045204|PGSC0003DMT400093269|PGSC0003DMT400066533|PGSC0003DMT400015610|PGSC0003DMT400060160|PGSC0003DMT400023116|PGSC0003DMT400004086|PGSC0003DMT400020697|PGSC0003DMT400058468|PGSC0003DMT400063187|PGSC0003DMT400008560|PGSC0003DMT400073501|PGSC0003DMT400047079|…	22	322	0.00761313	0.734885	http://www.genome.jp/kegg-bin/show_pathway?ko04075/K14495%09red/K14494%09red/K14484%09red/K14503%09red/K14432%09red/K14431%09red/K14487%09red/K14493%09red/K14492%09red/K14499%09red/K14488%09red/K14509%09red/K13422%09red/K12126%09red
ko00906	Carotenoid biosynthesis	PGSC0003DMT400004981|PGSC0003DMT400061846|PGSC0003DMT400047537|PGSC0003DMT400074346|PGSC0003DMT400071048	5	44	0.00815535	0.734885	http://www.genome.jp/kegg-bin/show_pathway?ko00906/K02291%09red/K09840%09red/K15746%09red/K09843%09red
ko04712	Circadian rhythm - plant	PGSC0003DMT400036075|PGSC0003DMT400022039|PGSC0003DMT400029402|PGSC0003DMT400076178|PGSC0003DMT400047079	5	44	0.00815535	0.734885	http://www.genome.jp/kegg-bin/show_pathway?ko04712/K10143%09red/K12118%09red/K12130%09red/K12126%09red/K00660%09red
ko04626	Plant-pathogen interaction	PGSC0003DMT400026987|PGSC0003DMT400007736|PGSC0003DMT400046278|PGSC0003DMT400014742|PGSC0003DMT400052233|PGSC0003DMT400090967|PGSC0003DMT400014123|PGSC0003DMT400063688|PGSC0003DMT400096032	9	207	0.0082123	0.734885	http://www.genome.jp/kegg-bin/show_pathway?ko04626/K13447%09red/K02183%09red/K13448%09red
ko00909	Sesquiterpenoid and triterpenoid biosynthesis	PGSC0003DMT400027448|PGSC0003DMT400008586|PGSC0003DMT400027291	3	20	0.00932273	0.734885	http://www.genome.jp/kegg-bin/show_pathway?ko00909/K00511%09red/K15803%09red/K15472%09red
ko00591	Linoleic acid metabolism	PGSC0003DMT400063477|PGSC0003DMT400058933|PGSC0003DMT400063446	3	21	0.0102963	0.734885	http://www.genome.jp/kegg-bin/show_pathway?ko00591/K00454%09red/K15718%09red
ko00072	Synthesis and degradation of ketone bodies	PGSC0003DMT400010866|PGSC0003DMT400032619	2	10	0.0108376	0.734885	http://www.genome.jp/kegg-bin/show_pathway?ko00072/K01641%09red
ko03022	Basal transcription factors	PGSC0003DMT400038588|PGSC0003DMT400071759|PGSC0003DMT400065932|PGSC0003DMT400065926	4	35	0.0112052	0.734885	http://www.genome.jp/kegg-bin/show_pathway?ko03022/K03142%09red/K03132%09red/K03124%09red
ko00030	Pentose phosphate pathway	PGSC0003DMT400028915|PGSC0003DMT400015282|PGSC0003DMT400065447|PGSC0003DMT400008103|PGSC0003DMT400043111	5	53	0.0139944	0.767579	http://www.genome.jp/kegg-bin/show_pathway?ko00030/K01623%09red/K00850%09red/K00895%09red/K00131%09red/K01807%09red
ko00650	Butanoate metabolism	PGSC0003DMT400010866|PGSC0003DMT400032619|PGSC0003DMT400044163	3	26	0.0156911	0.81049	http://www.genome.jp/kegg-bin/show_pathway?ko00650/K01641%09red/K17761%09red
ko00270	Cysteine and methionine metabolism	PGSC0003DMT400036990|PGSC0003DMT400057095|PGSC0003DMT400000764|PGSC0003DMT400000553|PGSC0003DMT400026053|PGSC0003DMT400016646|PGSC0003DMT400032096|PGSC0003DMT400082065	8	106	0.0174133	0.845611	http://www.genome.jp/kegg-bin/show_pathway?ko00270/K08967%09red/K00640%09red/K00547%09red/K01611%09red/K13034%09red/K01762%09red
ko04070	Phosphatidylinositol signaling system	PGSC0003DMT400036899|PGSC0003DMT400078346|PGSC0003DMT400038482|PGSC0003DMT400046278|PGSC0003DMT400069760|PGSC0003DMT400014123	6	74	0.0179077	0.845611	http://www.genome.jp/kegg-bin/show_pathway?ko04070/K05857%09red/K00921%09red/K00915%09red/K00999%09red/K02183%09red
ko04120	Ubiquitin mediated proteolysis	PGSC0003DMT400068726|PGSC0003DMT400083067|PGSC0003DMT400036075|PGSC0003DMT400072624|PGSC0003DMT400068727|PGSC0003DMT400063955|PGSC0003DMT400063662|PGSC0003DMT400056773|PGSC0003DMT400071311|PGSC0003DMT400044280|PGSC0003DMT400067648	11	164	0.0210023	0.868974	http://www.genome.jp/kegg-bin/show_pathway?ko04120/K10143%09red/K10140%09red/K10591%09red/K03094%09red/K10575%09red/K10599%09red/K03875%09red/K10573%09red/K03347%09red/K12456%09red
ko00941	Flavonoid biosynthesis	PGSC0003DMT400009287|PGSC0003DMT400048126|PGSC0003DMT400016512|PGSC0003DMT400009175|PGSC0003DMT400076178	5	62	0.0211822	0.868974	http://www.genome.jp/kegg-bin/show_pathway?ko00941/K00588%09red/K00475%09red/K13065%09red/K13082%09red/K00660%09red
ko00970	Aminoacyl-tRNA biosynthesis	PGSC0003DMT400060831|PGSC0003DMT400049361|PGSC0003DMT400000946|PGSC0003DMT400064813	4	46	0.0212144	0.868974	http://www.genome.jp/kegg-bin/show_pathway?ko00970/K01883%09red/K04567%09red/K01893%09red/K01887%09red
ko03430	Mismatch repair	PGSC0003DMT400025613|PGSC0003DMT400083292|PGSC0003DMT400015483|PGSC0003DMT400078745|PGSC0003DMT400017901	5	69	0.0274228	0.942106	http://www.genome.jp/kegg-bin/show_pathway?ko03430/K07466%09red/K10755%09red/K10747%09red
ko00760	Nicotinate and nicotinamide metabolism	PGSC0003DMT400023145|PGSC0003DMT400057060	2	21	0.0298625	0.953447	http://www.genome.jp/kegg-bin/show_pathway?ko00760/K06210%09red/K01240%09red
ko03030	DNA replication	PGSC0003DMT400025613|PGSC0003DMT400083292|PGSC0003DMT400015483|PGSC0003DMT400078745|PGSC0003DMT400017901	5	72	0.030208	0.953447	http://www.genome.jp/kegg-bin/show_pathway?ko03030/K07466%09red/K10755%09red/K10747%09red
ko00051	Fructose and mannose metabolism	PGSC0003DMT400065063|PGSC0003DMT400067858|PGSC0003DMT400065447|PGSC0003DMT400008103|PGSC0003DMT400043111	5	74	0.0320885	0.953447	http://www.genome.jp/kegg-bin/show_pathway?ko00051/K01809%09red/K01623%09red/K00850%09red/K00895%09red/K00008%09red
ko00603	Glycosphingolipid biosynthesis - globo series	PGSC0003DMT400049203	1	7	0.0322292	0.953447	http://www.genome.jp/kegg-bin/show_pathway?ko00603/K01988%09red
ko01040	Biosynthesis of unsaturated fatty acids	PGSC0003DMT400002555|PGSC0003DMT400061218|PGSC0003DMT400007615|PGSC0003DMT400086433	4	57	0.032853	0.958587	http://www.genome.jp/kegg-bin/show_pathway?ko01040/K10256%09red/K03921%09red
ko03060	Protein export	PGSC0003DMT400001064|PGSC0003DMT400063543|PGSC0003DMT400002877	3	43	0.0373933	0.961834	http://www.genome.jp/kegg-bin/show_pathway?ko03060/K09490%09red/K03070%09red/K03217%09red
ko03010	Ribosome	PGSC0003DMT400076290|PGSC0003DMT400073431|PGSC0003DMT400006681|PGSC0003DMT400002536|PGSC0003DMT400069029|PGSC0003DMT400002890|PGSC0003DMT400081989|PGSC0003DMT400061484|PGSC0003DMT400036807|PGSC0003DMT400054512|PGSC0003DMT400052955|PGSC0003DMT400020315|PGSC0003DMT400037556|PGSC0003DMT400013052|PGSC0003DMT400048186|PGSC0003DMT400017646|PGSC0003DMT400022864	17	309	0.0379788	0.961834	http://www.genome.jp/kegg-bin/show_pathway?ko03010/K02863%09red/K02955%09red/K02935%09red/K02872%09red/K02937%09red/K02873%09red/K02868%09red/K02893%09red/K02879%09red/K02987%09red/K02981%09red/K02969%09red/K02942%09red/K02958%09red/K02903%09red
ko04130	SNARE interactions in vesicular transport	PGSC0003DMT400028259|PGSC0003DMT400050219|PGSC0003DMT400067225	3	44	0.0386977	0.961834	http://www.genome.jp/kegg-bin/show_pathway?ko04130/K08515%09red/K08504%09red/K08493%09red
ko00562	Inositol phosphate metabolism	PGSC0003DMT400036899|PGSC0003DMT400078346|PGSC0003DMT400038482|PGSC0003DMT400069760	4	63	0.0393933	0.961834	http://www.genome.jp/kegg-bin/show_pathway?ko00562/K05857%09red/K00921%09red/K00915%09red/K00999%09red
ko03020	RNA polymerase	PGSC0003DMT400019706|PGSC0003DMT400077392|PGSC0003DMT400029782	3	46	0.0412855	0.961834	http://www.genome.jp/kegg-bin/show_pathway?ko03020/K03021%09red/K03025%09red/K03013%09red
ko00460	Cyanoamino acid metabolism	PGSC0003DMT400067695|PGSC0003DMT400013037|PGSC0003DMT400016646	3	46	0.0412855	0.961834	http://www.genome.jp/kegg-bin/show_pathway?ko00460/K13034%09red/K13035%09red/K05350%09red
ko03018	RNA degradation	PGSC0003DMT400073919|PGSC0003DMT400005501|PGSC0003DMT400015074|PGSC0003DMT400065447|PGSC0003DMT400055058|PGSC0003DMT400015091	6	105	0.043214	0.968903	http://www.genome.jp/kegg-bin/show_pathway?ko03018/K14442%09red/K00850%09red/K12592%09red/K12593%09red/K12611%09red/K12581%09red
ko00511	Other glycan degradation	PGSC0003DMT400012502	1	12	0.0468625	0.987093	http://www.genome.jp/kegg-bin/show_pathway?ko00511/K12309%09red
ko00230	Purine metabolism	PGSC0003DMT400019706|PGSC0003DMT400034809|PGSC0003DMT400076168|PGSC0003DMT400029782|PGSC0003DMT400077392|PGSC0003DMT400059281|PGSC0003DMT400026512|PGSC0003DMT400034522	8	151	0.0484317	0.987093	http://www.genome.jp/kegg-bin/show_pathway?ko00230/K03013%09red/K01519%09red/K01952%09red/K00601%09red/K03021%09red/K03025%09red/K00939%09red/K01933%09red
ko00531	Glycosaminoglycan degradation	PGSC0003DMT400012502	1	14	0.0517902	0.987093	http://www.genome.jp/kegg-bin/show_pathway?ko00531/K12309%09red
ko00100	Steroid biosynthesis	PGSC0003DMT400047969|PGSC0003DMT400008586	2	36	0.0544227	0.987093	http://www.genome.jp/kegg-bin/show_pathway?ko00100/K00511%09red/K08242%09red
ko00510	N-Glycan biosynthesis	PGSC0003DMT400047881|PGSC0003DMT400032896	2	37	0.0558407	0.987093	http://www.genome.jp/kegg-bin/show_pathway?ko00510/K00737%09red
ko00905	Brassinosteroid biosynthesis	PGSC0003DMT400061190	1	16	0.0562614	0.987093	http://www.genome.jp/kegg-bin/show_pathway?ko00905/K09588%09red
ko00561	Glycerolipid metabolism	PGSC0003DMT400000446|PGSC0003DMT400054412|PGSC0003DMT400072563|PGSC0003DMT400000152	4	80	0.0569048	0.987093	http://www.genome.jp/kegg-bin/show_pathway?ko00561/K13508%09red/K09480%09red/K01054%09red
ko00240	Pyrimidine metabolism	PGSC0003DMT400019706|PGSC0003DMT400076168|PGSC0003DMT400029782|PGSC0003DMT400023145|PGSC0003DMT400077392|PGSC0003DMT400002558	6	124	0.0586275	0.987093	http://www.genome.jp/kegg-bin/show_pathway?ko00240/K01519%09red/K01240%09red/K03021%09red/K03025%09red/K03013%09red/K00609%09red
ko04145	Phagosome	PGSC0003DMT400006517|PGSC0003DMT400078346|PGSC0003DMT400079981|PGSC0003DMT400037093	4	84	0.0606086	0.987093	http://www.genome.jp/kegg-bin/show_pathway?ko04145/K00921%09red/K07375%09red/K07897%09red
ko04933	AGE-RAGE signaling pathway in diabetic complications	PGSC0003DMT400069760	1	19	0.0622038	0.987093	http://www.genome.jp/kegg-bin/show_pathway?ko04933/K05857%09red
ko00450	Selenocompound metabolism	PGSC0003DMT400053412	1	19	0.0622038	0.987093	http://www.genome.jp/kegg-bin/show_pathway?ko00450/K08247%09red
ko04144	Endocytosis	PGSC0003DMT400006517|PGSC0003DMT400006680|PGSC0003DMT400025590|PGSC0003DMT400072624|PGSC0003DMT400041813|PGSC0003DMT400079981|PGSC0003DMT400001041|PGSC0003DMT400003226|PGSC0003DMT400021616	9	194	0.0630479	0.987093	http://www.genome.jp/kegg-bin/show_pathway?ko04144/K12183%09red/K10591%09red/K01115%09red/K12471%09red/K07937%09red/K12197%09red/K07897%09red/K07904%09red
ko00860	Porphyrin and chlorophyll metabolism	PGSC0003DMT400002866|PGSC0003DMT400008034	2	43	0.0636785	0.987093	http://www.genome.jp/kegg-bin/show_pathway?ko00860/K02492%09red/K00231%09red
ko00670	One carbon pool by folate	PGSC0003DMT400034522	1	21	0.0657103	0.987093	http://www.genome.jp/kegg-bin/show_pathway?ko00670/K00601%09red
ko00945	Stilbenoid, diarylheptanoid and gingerol biosynthesis	PGSC0003DMT400048126|PGSC0003DMT400016512	2	45	0.0660366	0.987093	http://www.genome.jp/kegg-bin/show_pathway?ko00945/K00588%09red/K13065%09red
ko00950	Isoquinoline alkaloid biosynthesis	PGSC0003DMT400048684|PGSC0003DMT400048706	2	45	0.0660366	0.987093	http://www.genome.jp/kegg-bin/show_pathway?ko00950/K00422%09red
ko00900	Terpenoid backbone biosynthesis	PGSC0003DMT400010866|PGSC0003DMT400040485|PGSC0003DMT400032619	3	68	0.0661394	0.987093	http://www.genome.jp/kegg-bin/show_pathway?ko00900/K13789%09red/K01641%09red
ko00564	Glycerophospholipid metabolism	PGSC0003DMT400025590|PGSC0003DMT400038482|PGSC0003DMT400078517|PGSC0003DMT400000152	4	94	0.0689705	0.987093	http://www.genome.jp/kegg-bin/show_pathway?ko00564/K13508%09red/K00999%09red/K08730%09red/K01115%09red
ko00250	Alanine, aspartate and glutamate metabolism	PGSC0003DMT400044163|PGSC0003DMT400002558	2	48	0.0693413	0.987093	http://www.genome.jp/kegg-bin/show_pathway?ko00250/K00609%09red/K17761%09red
ko00565	Ether lipid metabolism	PGSC0003DMT400025590	1	24	0.0703703	0.987093	http://www.genome.jp/kegg-bin/show_pathway?ko00565/K01115%09red
ko01212	Fatty acid metabolism	PGSC0003DMT400002555|PGSC0003DMT400061218|PGSC0003DMT400007615|PGSC0003DMT400086433	4	98	0.0719401	0.987093	http://www.genome.jp/kegg-bin/show_pathway?ko01212/K10256%09red/K03921%09red
ko00563	Glycosylphosphatidylinositol(GPI)-anchor biosynthesis	PGSC0003DMT400050882	1	27	0.0743977	0.987093	http://www.genome.jp/kegg-bin/show_pathway?ko00563/K05310%09red
ko00710	Carbon fixation in photosynthetic organisms	PGSC0003DMT400015282|PGSC0003DMT400008103|PGSC0003DMT400062138	3	79	0.0753359	0.987093	http://www.genome.jp/kegg-bin/show_pathway?ko00710/K01623%09red/K01602%09red/K01807%09red
ko00770	Pantothenate and CoA biosynthesis	PGSC0003DMT400043667	1	29	0.0767741	0.987093	http://www.genome.jp/kegg-bin/show_pathway?ko00770/K01922%09red
ko00520	Amino sugar and nucleotide sugar metabolism	PGSC0003DMT400008271|PGSC0003DMT400067858|PGSC0003DMT400064504|PGSC0003DMT400020223|PGSC0003DMT400010106	5	129	0.0768028	0.987093	http://www.genome.jp/kegg-bin/show_pathway?ko00520/K01809%09red/K01183%09red/K08679%09red
ko00052	Galactose metabolism	PGSC0003DMT400065447|PGSC0003DMT400012502	2	57	0.0776856	0.987093	http://www.genome.jp/kegg-bin/show_pathway?ko00052/K12309%09red/K00850%09red
ko03015	mRNA surveillance pathway	PGSC0003DMT400046377|PGSC0003DMT400001821|PGSC0003DMT400049444|PGSC0003DMT400014674	4	107	0.0778411	0.987093	http://www.genome.jp/kegg-bin/show_pathway?ko03015/K12881%09red/K14416%09red/K14403%09red/K14397%09red
ko00600	Sphingolipid metabolism	PGSC0003DMT400012502	1	33	0.0808862	0.987093	http://www.genome.jp/kegg-bin/show_pathway?ko00600/K12309%09red
ko03440	Homologous recombination	PGSC0003DMT400025613|PGSC0003DMT400083292|PGSC0003DMT400017901	3	88	0.0812699	0.987093	http://www.genome.jp/kegg-bin/show_pathway?ko03440/K07466%09red
ko00910	Nitrogen metabolism	PGSC0003DMT400020910	1	35	0.082661	0.987093	http://www.genome.jp/kegg-bin/show_pathway?ko00910/K01674%09red
ko00350	Tyrosine metabolism	PGSC0003DMT400048684|PGSC0003DMT400048706	2	66	0.0839731	0.987093	http://www.genome.jp/kegg-bin/show_pathway?ko00350/K00422%09red
ko00280	Valine, leucine and isoleucine degradation	PGSC0003DMT400010866|PGSC0003DMT400032619	2	70	0.0862147	0.987093	http://www.genome.jp/kegg-bin/show_pathway?ko00280/K01641%09red
ko00190	Oxidative phosphorylation	PGSC0003DMT400045783|PGSC0003DMT400032530|PGSC0003DMT400005639|PGSC0003DMT400043672	4	124	0.0862688	0.987093	http://www.genome.jp/kegg-bin/show_pathway?ko00190/K02140%09red/K02113%09red/K02267%09red/K03952%09red
ko00062	Fatty acid elongation	PGSC0003DMT400032993	1	40	0.0864107	0.987093	http://www.genome.jp/kegg-bin/show_pathway?ko00062/K15397%09red
ko00073	Cutin, suberine and wax biosynthesis	PGSC0003DMT400080690	1	40	0.0864107	0.987093	http://www.genome.jp/kegg-bin/show_pathway?ko00073/K13407%09red
ko00010	Glycolysis / Gluconeogenesis	PGSC0003DMT400028915|PGSC0003DMT400065447|PGSC0003DMT400008103|PGSC0003DMT400043111	4	126	0.087053	0.987093	http://www.genome.jp/kegg-bin/show_pathway?ko00010/K01623%09red/K00850%09red/K00895%09red/K00131%09red
ko03410	Base excision repair	PGSC0003DMT400078745	1	42	0.087673	0.987093	http://www.genome.jp/kegg-bin/show_pathway?ko03410/K10747%09red
ko01200	Carbon metabolism	PGSC0003DMT400028915|PGSC0003DMT400057095|PGSC0003DMT400015828|PGSC0003DMT400062138|PGSC0003DMT400071652|PGSC0003DMT400000764|PGSC0003DMT400065447|PGSC0003DMT400016646|PGSC0003DMT400008103|PGSC0003DMT400015282	10	277	0.0879525	0.987093	http://www.genome.jp/kegg-bin/show_pathway?ko01200/K15893%09red/K00850%09red/K00131%09red/K00658%09red/K00640%09red/K01807%09red/K01623%09red/K01602%09red/K13034%09red
ko04146	Peroxisome	PGSC0003DMT400012262|PGSC0003DMT400009629|PGSC0003DMT400042013	3	102	0.0880787	0.987093	http://www.genome.jp/kegg-bin/show_pathway?ko04146/K13337%09red/K13346%09red/K13347%09red
ko00061	Fatty acid biosynthesis	PGSC0003DMT400002555	1	46	0.0898571	0.987093	http://www.genome.jp/kegg-bin/show_pathway?ko00061/K03921%09red
ko00630	Glyoxylate and dicarboxylate metabolism	PGSC0003DMT400062138|PGSC0003DMT400015828	2	81	0.0909774	0.987093	http://www.genome.jp/kegg-bin/show_pathway?ko00630/K15893%09red/K01602%09red
ko00310	Lysine degradation	PGSC0003DMT400071652	1	49	0.0912375	0.987093	http://www.genome.jp/kegg-bin/show_pathway?ko00310/K00658%09red
ko00053	Ascorbate and aldarate metabolism	PGSC0003DMT400002341	1	50	0.0916546	0.987093	http://www.genome.jp/kegg-bin/show_pathway?ko00053/K00434%09red
ko00904	Diterpenoid biosynthesis	PGSC0003DMT400071045	1	51	0.0920519	0.987093	http://www.genome.jp/kegg-bin/show_pathway?ko00904/K04125%09red
ko00400	Phenylalanine, tyrosine and tryptophan biosynthesis	PGSC0003DMT400052381	1	52	0.0924303	0.987093	http://www.genome.jp/kegg-bin/show_pathway?ko00400/K15227%09red
ko00592	alpha-Linolenic acid metabolism	PGSC0003DMT400058933	1	53	0.0927907	0.987093	http://www.genome.jp/kegg-bin/show_pathway?ko00592/K00454%09red
ko00940	Phenylpropanoid biosynthesis	PGSC0003DMT400013037|PGSC0003DMT400016512|PGSC0003DMT400047469|PGSC0003DMT400064270|PGSC0003DMT400048126|PGSC0003DMT400026090|PGSC0003DMT400032789	7	229	0.0935232	0.987093	http://www.genome.jp/kegg-bin/show_pathway?ko00940/K00083%09red/K05350%09red/K00588%09red/K13065%09red/K00430%09red
ko01230	Biosynthesis of amino acids	PGSC0003DMT400057095|PGSC0003DMT400000764|PGSC0003DMT400065447|PGSC0003DMT400016646|PGSC0003DMT400008103|PGSC0003DMT400052381|PGSC0003DMT400015282	7	233	0.0941742	0.987093	http://www.genome.jp/kegg-bin/show_pathway?ko01230/K00850%09red/K00640%09red/K01807%09red/K01623%09red/K13034%09red/K15227%09red
ko00360	Phenylalanine metabolism	PGSC0003DMT400016512	1	58	0.0943513	0.987093	http://www.genome.jp/kegg-bin/show_pathway?ko00360/K00588%09red
ko00020	Citrate cycle (TCA cycle)	PGSC0003DMT400071652	1	59	0.0946204	0.987093	http://www.genome.jp/kegg-bin/show_pathway?ko00020/K00658%09red
ko03050	Proteasome	PGSC0003DMT400062813	1	60	0.0948766	0.987093	http://www.genome.jp/kegg-bin/show_pathway?ko03050/K03039%09red
ko00330	Arginine and proline metabolism	PGSC0003DMT400026053	1	64	0.0957853	0.987093	http://www.genome.jp/kegg-bin/show_pathway?ko00330/K01611%09red
ko00260	Glycine, serine and threonine metabolism	PGSC0003DMT400015828	1	76	0.0976543	0.990494	http://www.genome.jp/kegg-bin/show_pathway?ko00260/K15893%09red
ko00500	Starch and sucrose metabolism	PGSC0003DMT400013037|PGSC0003DMT400052839|PGSC0003DMT400023513|PGSC0003DMT400020223|PGSC0003DMT400010106|PGSC0003DMT400067951	6	245	0.0981329	0.99063	http://www.genome.jp/kegg-bin/show_pathway?ko00500/K08679%09red/K01177%09red/K01087%09red/K05350%09red/K00696%09red
ko00040	Pentose and glucuronate interconversions	PGSC0003DMT400065063	1	135	0.0998693	0.998693	http://www.genome.jp/kegg-bin/show_pathway?ko00040/K00008%09red

## Sheet: GO
GO_accession	Description	GeneNames	Ontology	pValue	qValue	GeneNumber	All gene
GO:0050896	response to stimulus	PGSC0003DMT400000192,PGSC0003DMT400000336,PGSC0003DMT400000365,PGSC0003DMT400000985,PGSC0003DMT400002375,PGSC0003DMT400003228,PGSC0003DMT400003784,PGSC0003DMT400003796,PGSC0003DMT400004046,PGSC0003DMT400004063,PGSC0003DMT400004695,PGSC0003DMT400005086,PGSC0003DMT400005512,PGSC0003DMT400005532,PGSC0003DMT400005546,PGSC0003DMT400005547,PGSC0003DMT400005558,PGSC0003DMT400005571,PGSC0003DMT400007511,…	BP	1.8e-10	3.132e-08	149	1933
GO:0005622	intracellular	PGSC0003DMT400000192,PGSC0003DMT400000266,PGSC0003DMT400000295,PGSC0003DMT400000365,PGSC0003DMT400000446,PGSC0003DMT400000447,PGSC0003DMT400000764,PGSC0003DMT400000859,PGSC0003DMT400000946,PGSC0003DMT400000985,PGSC0003DMT400001064,PGSC0003DMT400001470,PGSC0003DMT400001646,PGSC0003DMT400001661,PGSC0003DMT400001746,PGSC0003DMT400001821,PGSC0003DMT400002341,PGSC0003DMT400002375,PGSC0003DMT400002536,…	CC	2.7e-10	7.56e-09	444	7442
GO:0044424	intracellular part	PGSC0003DMT400000192,PGSC0003DMT400000266,PGSC0003DMT400000295,PGSC0003DMT400000365,PGSC0003DMT400000446,PGSC0003DMT400000447,PGSC0003DMT400000764,PGSC0003DMT400000859,PGSC0003DMT400000946,PGSC0003DMT400000985,PGSC0003DMT400001064,PGSC0003DMT400001470,PGSC0003DMT400001646,PGSC0003DMT400001661,PGSC0003DMT400001746,PGSC0003DMT400001821,PGSC0003DMT400002341,PGSC0003DMT400002375,PGSC0003DMT400002536,…	CC	2.7e-10	7.56e-09	444	7442
GO:0051716	cellular response to stimulus	PGSC0003DMT400000192,PGSC0003DMT400000365,PGSC0003DMT400002375,PGSC0003DMT400003228,PGSC0003DMT400003784,PGSC0003DMT400004063,PGSC0003DMT400005512,PGSC0003DMT400005532,PGSC0003DMT400005547,PGSC0003DMT400005558,PGSC0003DMT400005571,PGSC0003DMT400007511,PGSC0003DMT400008560,PGSC0003DMT400009439,PGSC0003DMT400010296,PGSC0003DMT400010297,PGSC0003DMT400011627,PGSC0003DMT400011661,PGSC0003DMT400012547,…	BP	8.3e-09	7.221e-07	91	1046
GO:0009628	response to abiotic stimulus	PGSC0003DMT400000336,PGSC0003DMT400000985,PGSC0003DMT400003796,PGSC0003DMT400008044,PGSC0003DMT400008264,PGSC0003DMT400009328,PGSC0003DMT400011627,PGSC0003DMT400015828,PGSC0003DMT400018643,PGSC0003DMT400018728,PGSC0003DMT400018798,PGSC0003DMT400020621,PGSC0003DMT400022039,PGSC0003DMT400023336,PGSC0003DMT400023432,PGSC0003DMT400023459,PGSC0003DMT400025712,PGSC0003DMT400027119,PGSC0003DMT400028622,…	BP	2.9e-08	1.682e-06	48	427
GO:0042221	response to chemical	PGSC0003DMT400000192,PGSC0003DMT400000365,PGSC0003DMT400000985,PGSC0003DMT400002375,PGSC0003DMT400003228,PGSC0003DMT400003784,PGSC0003DMT400003796,PGSC0003DMT400004063,PGSC0003DMT400004695,PGSC0003DMT400005512,PGSC0003DMT400005532,PGSC0003DMT400005547,PGSC0003DMT400005558,PGSC0003DMT400005571,PGSC0003DMT400007511,PGSC0003DMT400008264,PGSC0003DMT400008560,PGSC0003DMT400008586,PGSC0003DMT400009439,…	BP	3.4e-08	1.479e-06	88	1028
GO:0007165	signal transduction	PGSC0003DMT400000365,PGSC0003DMT400002375,PGSC0003DMT400003228,PGSC0003DMT400003784,PGSC0003DMT400004063,PGSC0003DMT400005512,PGSC0003DMT400005532,PGSC0003DMT400005547,PGSC0003DMT400005558,PGSC0003DMT400005571,PGSC0003DMT400007511,PGSC0003DMT400008560,PGSC0003DMT400009439,PGSC0003DMT400010296,PGSC0003DMT400010297,PGSC0003DMT400011627,PGSC0003DMT400011661,PGSC0003DMT400012547,PGSC0003DMT400015306,…	BP	1.4e-07	4.872e-06	68	743
GO:0070887	cellular response to chemical stimulus	PGSC0003DMT400000192,PGSC0003DMT400000365,PGSC0003DMT400002375,PGSC0003DMT400003228,PGSC0003DMT400003784,PGSC0003DMT400004063,PGSC0003DMT400005512,PGSC0003DMT400005532,PGSC0003DMT400005547,PGSC0003DMT400005558,PGSC0003DMT400005571,PGSC0003DMT400007511,PGSC0003DMT400008560,PGSC0003DMT400009439,PGSC0003DMT400010296,PGSC0003DMT400010297,PGSC0003DMT400011627,PGSC0003DMT400011661,PGSC0003DMT400012547,…	BP	1.5e-07	4.35e-06	67	728
GO:0023052	signaling	PGSC0003DMT400000365,PGSC0003DMT400002375,PGSC0003DMT400003228,PGSC0003DMT400003784,PGSC0003DMT400004063,PGSC0003DMT400005512,PGSC0003DMT400005532,PGSC0003DMT400005547,PGSC0003DMT400005558,PGSC0003DMT400005571,PGSC0003DMT400007511,PGSC0003DMT400008560,PGSC0003DMT400009439,PGSC0003DMT400010296,PGSC0003DMT400010297,PGSC0003DMT400011627,PGSC0003DMT400011661,PGSC0003DMT400012547,PGSC0003DMT400015306,…	BP	1.7e-07	3.944e-06	68	746
GO:0009755	hormone-mediated signaling pathway	PGSC0003DMT400000365,PGSC0003DMT400002375,PGSC0003DMT400003228,PGSC0003DMT400003784,PGSC0003DMT400004063,PGSC0003DMT400005512,PGSC0003DMT400005532,PGSC0003DMT400005547,PGSC0003DMT400005558,PGSC0003DMT400005571,PGSC0003DMT400007511,PGSC0003DMT400008560,PGSC0003DMT400009439,PGSC0003DMT400010296,PGSC0003DMT400010297,PGSC0003DMT400011627,PGSC0003DMT400011661,PGSC0003DMT400012547,PGSC0003DMT400015306,…	BP	1.7e-07	3.944e-06	61	640
GO:0007154	cell communication	PGSC0003DMT400000365,PGSC0003DMT400002375,PGSC0003DMT400003228,PGSC0003DMT400003784,PGSC0003DMT400004063,PGSC0003DMT400005512,PGSC0003DMT400005532,PGSC0003DMT400005547,PGSC0003DMT400005558,PGSC0003DMT400005571,PGSC0003DMT400007511,PGSC0003DMT400008560,PGSC0003DMT400009439,PGSC0003DMT400010296,PGSC0003DMT400010297,PGSC0003DMT400011627,PGSC0003DMT400011661,PGSC0003DMT400012547,PGSC0003DMT400015306,…	BP	2.4e-07	4.64e-06	70	784
GO:0010033	response to organic substance	PGSC0003DMT400000192,PGSC0003DMT400000365,PGSC0003DMT400002375,PGSC0003DMT400003228,PGSC0003DMT400003784,PGSC0003DMT400004063,PGSC0003DMT400004695,PGSC0003DMT400005512,PGSC0003DMT400005532,PGSC0003DMT400005547,PGSC0003DMT400005558,PGSC0003DMT400005571,PGSC0003DMT400007511,PGSC0003DMT400008264,PGSC0003DMT400008560,PGSC0003DMT400008586,PGSC0003DMT400009439,PGSC0003DMT400010296,PGSC0003DMT400010297,…	BP	2.5e-07	4.35e-06	77	895
GO:0050794	regulation of cellular process	PGSC0003DMT400000192,PGSC0003DMT400000365,PGSC0003DMT400002375,PGSC0003DMT400003228,PGSC0003DMT400003784,PGSC0003DMT400003796,PGSC0003DMT400004063,PGSC0003DMT400005512,PGSC0003DMT400005532,PGSC0003DMT400005547,PGSC0003DMT400005558,PGSC0003DMT400005571,PGSC0003DMT400007511,PGSC0003DMT400008560,PGSC0003DMT400009439,PGSC0003DMT400010296,PGSC0003DMT400010297,PGSC0003DMT400011236,PGSC0003DMT400011562,…	BP	4.3e-07	6.80182e-06	89	1103
GO:0005634	nucleus	PGSC0003DMT400000192,PGSC0003DMT400000266,PGSC0003DMT400000365,PGSC0003DMT400000859,PGSC0003DMT400000985,PGSC0003DMT400001661,PGSC0003DMT400001746,PGSC0003DMT400001821,PGSC0003DMT400002375,PGSC0003DMT400002790,PGSC0003DMT400003784,PGSC0003DMT400003796,PGSC0003DMT400004130,PGSC0003DMT400004695,PGSC0003DMT400005512,PGSC0003DMT400006421,PGSC0003DMT400006581,PGSC0003DMT400006590,PGSC0003DMT400006735,…	CC	5e-07	7e-06	193	2764
GO:0032870	cellular response to hormone stimulus	PGSC0003DMT400000365,PGSC0003DMT400002375,PGSC0003DMT400003228,PGSC0003DMT400003784,PGSC0003DMT400004063,PGSC0003DMT400005512,PGSC0003DMT400005532,PGSC0003DMT400005547,PGSC0003DMT400005558,PGSC0003DMT400005571,PGSC0003DMT400007511,PGSC0003DMT400008560,PGSC0003DMT400009439,PGSC0003DMT400010296,PGSC0003DMT400010297,PGSC0003DMT400011627,PGSC0003DMT400011661,PGSC0003DMT400012547,PGSC0003DMT400015306,…	BP	5.8e-07	8.41e-06	62	678
GO:0009266	response to temperature stimulus	PGSC0003DMT400003796,PGSC0003DMT400008264,PGSC0003DMT400018643,PGSC0003DMT400018728,PGSC0003DMT400018798,PGSC0003DMT400020621,PGSC0003DMT400023336,PGSC0003DMT400025712,PGSC0003DMT400027119,PGSC0003DMT400028622,PGSC0003DMT400033475,PGSC0003DMT400036349,PGSC0003DMT400044163,PGSC0003DMT400044362,PGSC0003DMT400049600,PGSC0003DMT400051809,PGSC0003DMT400055930,PGSC0003DMT400067321,PGSC0003DMT400067485,…	BP	8.5e-07	1.13769e-05	21	129
GO:0009523	photosystem II	PGSC0003DMT400010985,PGSC0003DMT400021388,PGSC0003DMT400022072,PGSC0003DMT400022987,PGSC0003DMT400034896,PGSC0003DMT400034897,PGSC0003DMT400034898,PGSC0003DMT400034902,PGSC0003DMT400035006,PGSC0003DMT400042742,PGSC0003DMT400045248,PGSC0003DMT400050232,PGSC0003DMT400051899,PGSC0003DMT400054836,PGSC0003DMT400066554	CC	9.2e-07	9.66e-06	15	66
GO:0071495	cellular response to endogenous stimulus	PGSC0003DMT400000365,PGSC0003DMT400002375,PGSC0003DMT400003228,PGSC0003DMT400003784,PGSC0003DMT400004063,PGSC0003DMT400005512,PGSC0003DMT400005532,PGSC0003DMT400005547,PGSC0003DMT400005558,PGSC0003DMT400005571,PGSC0003DMT400007511,PGSC0003DMT400008560,PGSC0003DMT400009439,PGSC0003DMT400010296,PGSC0003DMT400010297,PGSC0003DMT400011627,PGSC0003DMT400011661,PGSC0003DMT400012547,PGSC0003DMT400015306,…	BP	1e-06	1.24286e-05	62	689
GO:0009521	photosystem	PGSC0003DMT400010985,PGSC0003DMT400021388,PGSC0003DMT400022072,PGSC0003DMT400022987,PGSC0003DMT400034896,PGSC0003DMT400034897,PGSC0003DMT400034898,PGSC0003DMT400034902,PGSC0003DMT400035006,PGSC0003DMT400042742,PGSC0003DMT400045248,PGSC0003DMT400050232,PGSC0003DMT400051899,PGSC0003DMT400054480,PGSC0003DMT400054836,PGSC0003DMT400066554,PGSC0003DMT400083158	CC	1e-06	8.4e-06	17	84
GO:0009535	chloroplast thylakoid membrane	PGSC0003DMT400001064,PGSC0003DMT400002341,PGSC0003DMT400002877,PGSC0003DMT400008502,PGSC0003DMT400010985,PGSC0003DMT400021388,PGSC0003DMT400022072,PGSC0003DMT400022987,PGSC0003DMT400029398,PGSC0003DMT400034896,PGSC0003DMT400034897,PGSC0003DMT400034898,PGSC0003DMT400034902,PGSC0003DMT400035006,PGSC0003DMT400037299,PGSC0003DMT400042742,PGSC0003DMT400043672,PGSC0003DMT400045248,PGSC0003DMT400045722,…	CC	1.2e-06	7.2e-06	29	211
GO:0042651	thylakoid membrane	PGSC0003DMT400001064,PGSC0003DMT400002341,PGSC0003DMT400002877,PGSC0003DMT400008502,PGSC0003DMT400010985,PGSC0003DMT400021388,PGSC0003DMT400022072,PGSC0003DMT400022987,PGSC0003DMT400029398,PGSC0003DMT400034896,PGSC0003DMT400034897,PGSC0003DMT400034898,PGSC0003DMT400034902,PGSC0003DMT400035006,PGSC0003DMT400037299,PGSC0003DMT400042742,PGSC0003DMT400043672,PGSC0003DMT400045248,PGSC0003DMT400045722,…	CC	1.2e-06	7.2e-06	29	211
GO:0055035	plastid thylakoid membrane	PGSC0003DMT400001064,PGSC0003DMT400002341,PGSC0003DMT400002877,PGSC0003DMT400008502,PGSC0003DMT400010985,PGSC0003DMT400021388,PGSC0003DMT400022072,PGSC0003DMT400022987,PGSC0003DMT400029398,PGSC0003DMT400034896,PGSC0003DMT400034897,PGSC0003DMT400034898,PGSC0003DMT400034902,PGSC0003DMT400035006,PGSC0003DMT400037299,PGSC0003DMT400042742,PGSC0003DMT400043672,PGSC0003DMT400045248,PGSC0003DMT400045722,…	CC	1.2e-06	7.2e-06	29	211
GO:0071310	cellular response to organic substance	PGSC0003DMT400000365,PGSC0003DMT400002375,PGSC0003DMT400003228,PGSC0003DMT400003784,PGSC0003DMT400004063,PGSC0003DMT400005512,PGSC0003DMT400005532,PGSC0003DMT400005547,PGSC0003DMT400005558,PGSC0003DMT400005571,PGSC0003DMT400007511,PGSC0003DMT400008560,PGSC0003DMT400009439,PGSC0003DMT400010296,PGSC0003DMT400010297,PGSC0003DMT400011627,PGSC0003DMT400011661,PGSC0003DMT400012547,PGSC0003DMT400015306,…	BP	1.4e-06	1.624e-05	62	696
GO:0009409	response to cold	PGSC0003DMT400003796,PGSC0003DMT400008264,PGSC0003DMT400018643,PGSC0003DMT400018728,PGSC0003DMT400018798,PGSC0003DMT400023336,PGSC0003DMT400025712,PGSC0003DMT400027119,PGSC0003DMT400028622,PGSC0003DMT400036349,PGSC0003DMT400044163,PGSC0003DMT400044362,PGSC0003DMT400049600,PGSC0003DMT400067321,PGSC0003DMT400067485,PGSC0003DMT400078745,PGSC0003DMT400083158	BP	1.6e-06	1.74e-05	17	92
GO:0034357	photosynthetic membrane	PGSC0003DMT400001064,PGSC0003DMT400002341,PGSC0003DMT400002877,PGSC0003DMT400008502,PGSC0003DMT400010985,PGSC0003DMT400021388,PGSC0003DMT400022072,PGSC0003DMT400022987,PGSC0003DMT400029398,PGSC0003DMT400034896,PGSC0003DMT400034897,PGSC0003DMT400034898,PGSC0003DMT400034902,PGSC0003DMT400035006,PGSC0003DMT400037299,PGSC0003DMT400042742,PGSC0003DMT400043672,PGSC0003DMT400045248,PGSC0003DMT400045722,…	CC	1.6e-06	7.46667e-06	29	214
GO:0009534	chloroplast thylakoid	PGSC0003DMT400001064,PGSC0003DMT400002341,PGSC0003DMT400002877,PGSC0003DMT400008502,PGSC0003DMT400010985,PGSC0003DMT400014565,PGSC0003DMT400021388,PGSC0003DMT400022072,PGSC0003DMT400022987,PGSC0003DMT400029398,PGSC0003DMT400034896,PGSC0003DMT400034897,PGSC0003DMT400034898,PGSC0003DMT400034902,PGSC0003DMT400035006,PGSC0003DMT400037299,PGSC0003DMT400042742,PGSC0003DMT400043672,PGSC0003DMT400045248,…	CC	1.7e-06	6.8e-06	34	275
GO:0031976	plastid thylakoid	PGSC0003DMT400001064,PGSC0003DMT400002341,PGSC0003DMT400002877,PGSC0003DMT400008502,PGSC0003DMT400010985,PGSC0003DMT400014565,PGSC0003DMT400021388,PGSC0003DMT400022072,PGSC0003DMT400022987,PGSC0003DMT400029398,PGSC0003DMT400034896,PGSC0003DMT400034897,PGSC0003DMT400034898,PGSC0003DMT400034902,PGSC0003DMT400035006,PGSC0003DMT400037299,PGSC0003DMT400042742,PGSC0003DMT400043672,PGSC0003DMT400045248,…	CC	1.7e-06	6.8e-06	34	275
GO:0009725	response to hormone	PGSC0003DMT400000365,PGSC0003DMT400002375,PGSC0003DMT400003228,PGSC0003DMT400003784,PGSC0003DMT400004063,PGSC0003DMT400005512,PGSC0003DMT400005532,PGSC0003DMT400005547,PGSC0003DMT400005558,PGSC0003DMT400005571,PGSC0003DMT400007511,PGSC0003DMT400008560,PGSC0003DMT400008586,PGSC0003DMT400009439,PGSC0003DMT400010296,PGSC0003DMT400010297,PGSC0003DMT400011627,PGSC0003DMT400011661,PGSC0003DMT400012547,…	BP	1.9e-06	1.94471e-05	68	796
GO:0005623	cell	PGSC0003DMT400000192,PGSC0003DMT400000266,PGSC0003DMT400000295,PGSC0003DMT400000365,PGSC0003DMT400000446,PGSC0003DMT400000447,PGSC0003DMT400000536,PGSC0003DMT400000764,PGSC0003DMT400000859,PGSC0003DMT400000946,PGSC0003DMT400000985,PGSC0003DMT400001064,PGSC0003DMT400001470,PGSC0003DMT400001646,PGSC0003DMT400001661,PGSC0003DMT400001746,PGSC0003DMT400001821,PGSC0003DMT400002341,PGSC0003DMT400002375,…	CC	2.4e-06	8.064e-06	481	8618
GO:0044464	cell part	PGSC0003DMT400000192,PGSC0003DMT400000266,PGSC0003DMT400000295,PGSC0003DMT400000365,PGSC0003DMT400000446,PGSC0003DMT400000447,PGSC0003DMT400000536,PGSC0003DMT400000764,PGSC0003DMT400000859,PGSC0003DMT400000946,PGSC0003DMT400000985,PGSC0003DMT400001064,PGSC0003DMT400001470,PGSC0003DMT400001646,PGSC0003DMT400001661,PGSC0003DMT400001746,PGSC0003DMT400001821,PGSC0003DMT400002341,PGSC0003DMT400002375,…	CC	2.4e-06	8.064e-06	481	8618
GO:0009579	thylakoid	PGSC0003DMT400001064,PGSC0003DMT400002341,PGSC0003DMT400002877,PGSC0003DMT400008502,PGSC0003DMT400010985,PGSC0003DMT400014565,PGSC0003DMT400021388,PGSC0003DMT400022072,PGSC0003DMT400022987,PGSC0003DMT400029398,PGSC0003DMT400034896,PGSC0003DMT400034897,PGSC0003DMT400034898,PGSC0003DMT400034902,PGSC0003DMT400035006,PGSC0003DMT400037299,PGSC0003DMT400042742,PGSC0003DMT400043672,PGSC0003DMT400045248,…	CC	2.6e-06	7.8e-06	34	280
GO:0015979	photosynthesis	PGSC0003DMT400010985,PGSC0003DMT400018798,PGSC0003DMT400021388,PGSC0003DMT400022072,PGSC0003DMT400022987,PGSC0003DMT400023336,PGSC0003DMT400023432,PGSC0003DMT400025712,PGSC0003DMT400034896,PGSC0003DMT400034897,PGSC0003DMT400034898,PGSC0003DMT400034902,PGSC0003DMT400035006,PGSC0003DMT400042742,PGSC0003DMT400045248,PGSC0003DMT400050232,PGSC0003DMT400051899,PGSC0003DMT400054480,PGSC0003DMT400054836,…	BP	2.7e-06	2.61e-05	23	161
GO:0009719	response to endogenous stimulus	PGSC0003DMT400000365,PGSC0003DMT400002375,PGSC0003DMT400003228,PGSC0003DMT400003784,PGSC0003DMT400004063,PGSC0003DMT400005512,PGSC0003DMT400005532,PGSC0003DMT400005547,PGSC0003DMT400005558,PGSC0003DMT400005571,PGSC0003DMT400007511,PGSC0003DMT400008560,PGSC0003DMT400008586,PGSC0003DMT400009439,PGSC0003DMT400010296,PGSC0003DMT400010297,PGSC0003DMT400011627,PGSC0003DMT400011661,PGSC0003DMT400012547,…	BP	2.9e-06	2.65579e-05	68	806
GO:0018298	protein-chromophore linkage	PGSC0003DMT400010985,PGSC0003DMT400021388,PGSC0003DMT400022039,PGSC0003DMT400022072,PGSC0003DMT400022987,PGSC0003DMT400034896,PGSC0003DMT400034897,PGSC0003DMT400034898,PGSC0003DMT400034902,PGSC0003DMT400035006,PGSC0003DMT400050232,PGSC0003DMT400054836,PGSC0003DMT400065251,PGSC0003DMT400083158	BP	3.5e-06	3.045e-05	14	68
GO:0044436	thylakoid part	PGSC0003DMT400001064,PGSC0003DMT400002341,PGSC0003DMT400002877,PGSC0003DMT400008502,PGSC0003DMT400010985,PGSC0003DMT400021388,PGSC0003DMT400022072,PGSC0003DMT400022987,PGSC0003DMT400029398,PGSC0003DMT400034896,PGSC0003DMT400034897,PGSC0003DMT400034898,PGSC0003DMT400034902,PGSC0003DMT400035006,PGSC0003DMT400037299,PGSC0003DMT400042742,PGSC0003DMT400043672,PGSC0003DMT400045248,PGSC0003DMT400045722,…	CC	5e-06	1.4e-05	32	263
GO:0009522	photosystem I	PGSC0003DMT400010985,PGSC0003DMT400021388,PGSC0003DMT400022072,PGSC0003DMT400034896,PGSC0003DMT400034897,PGSC0003DMT400034898,PGSC0003DMT400034902,PGSC0003DMT400035006,PGSC0003DMT400050232,PGSC0003DMT400054480,PGSC0003DMT400054836,PGSC0003DMT400083158	CC	6.2e-06	1.6275e-05	12	50
GO:0004842	ubiquitin-protein transferase activity	PGSC0003DMT400015306,PGSC0003DMT400028812,PGSC0003DMT400036075,PGSC0003DMT400044280,PGSC0003DMT400054947,PGSC0003DMT400054948,PGSC0003DMT400054949,PGSC0003DMT400055045,PGSC0003DMT400055050,PGSC0003DMT400063955	MF	1.1e-05	0.000341	10	36
GO:0050789	regulation of biological process	PGSC0003DMT400000192,PGSC0003DMT400000365,PGSC0003DMT400000985,PGSC0003DMT400002375,PGSC0003DMT400003228,PGSC0003DMT400003784,PGSC0003DMT400003796,PGSC0003DMT400004063,PGSC0003DMT400005512,PGSC0003DMT400005532,PGSC0003DMT400005547,PGSC0003DMT400005558,PGSC0003DMT400005571,PGSC0003DMT400007511,PGSC0003DMT400008044,PGSC0003DMT400008264,PGSC0003DMT400008560,PGSC0003DMT400009328,PGSC0003DMT400009439,…	BP	1.5e-05	0.000124286	98	1356
GO:0009644	response to high light intensity	PGSC0003DMT400008264,PGSC0003DMT400018728,PGSC0003DMT400022039,PGSC0003DMT400042742,PGSC0003DMT400066554,PGSC0003DMT400083158	BP	1.6e-05	0.000126545	6	13
GO:0016168	chlorophyll binding	PGSC0003DMT400010985,PGSC0003DMT400021388,PGSC0003DMT400022072,PGSC0003DMT400022987,PGSC0003DMT400034896,PGSC0003DMT400034897,PGSC0003DMT400034898,PGSC0003DMT400034902,PGSC0003DMT400035006,PGSC0003DMT400050232,PGSC0003DMT400054836,PGSC0003DMT400083158	MF	1.7e-05	0.0002635	12	54
GO:0009314	response to radiation	PGSC0003DMT400008044,PGSC0003DMT400008264,PGSC0003DMT400009328,PGSC0003DMT400015828,PGSC0003DMT400018728,PGSC0003DMT400018798,PGSC0003DMT400022039,PGSC0003DMT400023336,PGSC0003DMT400023432,PGSC0003DMT400023459,PGSC0003DMT400025712,PGSC0003DMT400036075,PGSC0003DMT400042742,PGSC0003DMT400044163,PGSC0003DMT400044562,PGSC0003DMT400047079,PGSC0003DMT400058735,PGSC0003DMT400066554,PGSC0003DMT400066807,…	BP	1.8e-05	0.000133277	23	180
GO:0009416	response to light stimulus	PGSC0003DMT400008044,PGSC0003DMT400008264,PGSC0003DMT400009328,PGSC0003DMT400015828,PGSC0003DMT400018728,PGSC0003DMT400018798,PGSC0003DMT400022039,PGSC0003DMT400023336,PGSC0003DMT400023432,PGSC0003DMT400023459,PGSC0003DMT400025712,PGSC0003DMT400036075,PGSC0003DMT400042742,PGSC0003DMT400044163,PGSC0003DMT400044562,PGSC0003DMT400047079,PGSC0003DMT400058735,PGSC0003DMT400066554,PGSC0003DMT400066807,…	BP	1.8e-05	0.000133277	23	180
GO:0019787	ubiquitin-like protein transferase activity	PGSC0003DMT400015306,PGSC0003DMT400028812,PGSC0003DMT400036075,PGSC0003DMT400044280,PGSC0003DMT400054947,PGSC0003DMT400054948,PGSC0003DMT400054949,PGSC0003DMT400055045,PGSC0003DMT400055050,PGSC0003DMT400063955	MF	2.3e-05	0.000237667	10	39
GO:0006950	response to stress	PGSC0003DMT400000192,PGSC0003DMT400000336,PGSC0003DMT400000985,PGSC0003DMT400003796,PGSC0003DMT400004046,PGSC0003DMT400004695,PGSC0003DMT400005086,PGSC0003DMT400005546,PGSC0003DMT400008264,PGSC0003DMT400009064,PGSC0003DMT400011236,PGSC0003DMT400011627,PGSC0003DMT400015828,PGSC0003DMT400018531,PGSC0003DMT400018643,PGSC0003DMT400018728,PGSC0003DMT400018798,PGSC0003DMT400020621,PGSC0003DMT400022039,…	BP	2.6e-05	0.00018096	82	1096
GO:0046906	tetrapyrrole binding	PGSC0003DMT400010985,PGSC0003DMT400021388,PGSC0003DMT400022072,PGSC0003DMT400022987,PGSC0003DMT400034896,PGSC0003DMT400034897,PGSC0003DMT400034898,PGSC0003DMT400034902,PGSC0003DMT400035006,PGSC0003DMT400050232,PGSC0003DMT400054836,PGSC0003DMT400083158	MF	2.6e-05	0.0002015	12	56
GO:0043227	membrane-bounded organelle	PGSC0003DMT400000192,PGSC0003DMT400000266,PGSC0003DMT400000295,PGSC0003DMT400000365,PGSC0003DMT400000446,PGSC0003DMT400000447,PGSC0003DMT400000859,PGSC0003DMT400000946,PGSC0003DMT400000985,PGSC0003DMT400001064,PGSC0003DMT400001470,PGSC0003DMT400001646,PGSC0003DMT400001661,PGSC0003DMT400001746,PGSC0003DMT400001821,PGSC0003DMT400002341,PGSC0003DMT400002375,PGSC0003DMT400002555,PGSC0003DMT400002558,…	CC	3.9e-05	9.36e-05	363	6200
GO:0043226	organelle	PGSC0003DMT400000192,PGSC0003DMT400000266,PGSC0003DMT400000295,PGSC0003DMT400000365,PGSC0003DMT400000446,PGSC0003DMT400000447,PGSC0003DMT400000859,PGSC0003DMT400000946,PGSC0003DMT400000985,PGSC0003DMT400001064,PGSC0003DMT400001470,PGSC0003DMT400001646,PGSC0003DMT400001661,PGSC0003DMT400001746,PGSC0003DMT400001821,PGSC0003DMT400002341,PGSC0003DMT400002375,PGSC0003DMT400002536,PGSC0003DMT400002555,…	CC	3.9e-05	9.36e-05	384	6629
GO:0098796	membrane protein complex	PGSC0003DMT400010985,PGSC0003DMT400021388,PGSC0003DMT400022072,PGSC0003DMT400022987,PGSC0003DMT400034896,PGSC0003DMT400034897,PGSC0003DMT400034898,PGSC0003DMT400034902,PGSC0003DMT400035006,PGSC0003DMT400042742,PGSC0003DMT400043672,PGSC0003DMT400045248,PGSC0003DMT400050232,PGSC0003DMT400051899,PGSC0003DMT400054480,PGSC0003DMT400054836,PGSC0003DMT400066554,PGSC0003DMT400067225,PGSC0003DMT400071157,…	CC	4.4e-05	9.72632e-05	21	155
GO:0044434	chloroplast part	PGSC0003DMT400000446,PGSC0003DMT400001064,PGSC0003DMT400002341,PGSC0003DMT400002877,PGSC0003DMT400003958,PGSC0003DMT400004369,PGSC0003DMT400004981,PGSC0003DMT400008103,PGSC0003DMT400008264,PGSC0003DMT400008502,PGSC0003DMT400010985,PGSC0003DMT400012249,PGSC0003DMT400014351,PGSC0003DMT400014565,PGSC0003DMT400016494,PGSC0003DMT400020910,PGSC0003DMT400021388,PGSC0003DMT400022072,PGSC0003DMT400022863,…	CC	5e-05	0.000105	60	697
GO:0043229	intracellular organelle	PGSC0003DMT400000192,PGSC0003DMT400000266,PGSC0003DMT400000295,PGSC0003DMT400000365,PGSC0003DMT400000446,PGSC0003DMT400000447,PGSC0003DMT400000859,PGSC0003DMT400000946,PGSC0003DMT400000985,PGSC0003DMT400001064,PGSC0003DMT400001470,PGSC0003DMT400001646,PGSC0003DMT400001661,PGSC0003DMT400001746,PGSC0003DMT400001821,PGSC0003DMT400002341,PGSC0003DMT400002375,PGSC0003DMT400002536,PGSC0003DMT400002555,…	CC	5.6e-05	0.000112	383	6627
GO:1901000	regulation of response to salt stress	PGSC0003DMT400000985,PGSC0003DMT400003796,PGSC0003DMT400008264,PGSC0003DMT400023459,PGSC0003DMT400037472,PGSC0003DMT400064306,PGSC0003DMT400069921,PGSC0003DMT400097756	BP	6.4e-05	0.000428308	8	30
GO:0044435	plastid part	PGSC0003DMT400000446,PGSC0003DMT400001064,PGSC0003DMT400002341,PGSC0003DMT400002877,PGSC0003DMT400003958,PGSC0003DMT400004369,PGSC0003DMT400004981,PGSC0003DMT400008103,PGSC0003DMT400008264,PGSC0003DMT400008502,PGSC0003DMT400010985,PGSC0003DMT400012249,PGSC0003DMT400014351,PGSC0003DMT400014565,PGSC0003DMT400016494,PGSC0003DMT400020910,PGSC0003DMT400021388,PGSC0003DMT400022072,PGSC0003DMT400022863,…	CC	6.4e-05	0.000122182	60	703
GO:0047484	regulation of response to osmotic stress	PGSC0003DMT400000985,PGSC0003DMT400003796,PGSC0003DMT400008264,PGSC0003DMT400023459,PGSC0003DMT400037472,PGSC0003DMT400064306,PGSC0003DMT400069921,PGSC0003DMT400097756	BP	0.00011	0.00066	8	32
GO:0036294	cellular response to decreased oxygen levels	PGSC0003DMT400018798,PGSC0003DMT400023336,PGSC0003DMT400025712	BP	0.00011	0.00066	3	3
GO:0071453	cellular response to oxygen levels	PGSC0003DMT400018798,PGSC0003DMT400023336,PGSC0003DMT400025712	BP	0.00011	0.00066	3	3
GO:0071454	cellular response to anoxia	PGSC0003DMT400018798,PGSC0003DMT400023336,PGSC0003DMT400025712	BP	0.00011	0.00066	3	3
GO:0006413	translational initiation	PGSC0003DMT400007325,PGSC0003DMT400011661,PGSC0003DMT400034911,PGSC0003DMT400043056,PGSC0003DMT400044186,PGSC0003DMT400049575,PGSC0003DMT400060836,PGSC0003DMT400063132,PGSC0003DMT400076704,PGSC0003DMT400078293	BP	0.00011	0.00066	10	50
GO:0009733	response to auxin	PGSC0003DMT400000365,PGSC0003DMT400003228,PGSC0003DMT400003784,PGSC0003DMT400004063,PGSC0003DMT400005532,PGSC0003DMT400005547,PGSC0003DMT400005558,PGSC0003DMT400005571,PGSC0003DMT400009439,PGSC0003DMT400011661,PGSC0003DMT400015610,PGSC0003DMT400023971,PGSC0003DMT400028619,PGSC0003DMT400034486,PGSC0003DMT400036094,PGSC0003DMT400036765,PGSC0003DMT400038054,PGSC0003DMT400039303,PGSC0003DMT400063955,…	BP	0.00012	0.0006525	28	271
GO:0032991	protein-containing complex	PGSC0003DMT400000859,PGSC0003DMT400001746,PGSC0003DMT400002536,PGSC0003DMT400002890,PGSC0003DMT400006581,PGSC0003DMT400006681,PGSC0003DMT400010908,PGSC0003DMT400010985,PGSC0003DMT400011661,PGSC0003DMT400012169,PGSC0003DMT400013052,PGSC0003DMT400014351,PGSC0003DMT400014493,PGSC0003DMT400015074,PGSC0003DMT400017646,PGSC0003DMT400018367,PGSC0003DMT400018531,PGSC0003DMT400018728,PGSC0003DMT400018798,…	CC	0.00013	0.000237391	71	893
GO:0016151	nickel cation binding	PGSC0003DMT400018798,PGSC0003DMT400023336,PGSC0003DMT400025712	MF	0.00014	0.000868	3	3
GO:0043231	intracellular membrane-bounded organelle	PGSC0003DMT400000192,PGSC0003DMT400000266,PGSC0003DMT400000295,PGSC0003DMT400000365,PGSC0003DMT400000446,PGSC0003DMT400000447,PGSC0003DMT400000859,PGSC0003DMT400000946,PGSC0003DMT400000985,PGSC0003DMT400001064,PGSC0003DMT400001470,PGSC0003DMT400001646,PGSC0003DMT400001661,PGSC0003DMT400001746,PGSC0003DMT400001821,PGSC0003DMT400002341,PGSC0003DMT400002375,PGSC0003DMT400002555,PGSC0003DMT400002558,…	CC	0.00014	0.000245	354	6086
GO:0065007	biological regulation	PGSC0003DMT400000192,PGSC0003DMT400000365,PGSC0003DMT400000553,PGSC0003DMT400000985,PGSC0003DMT400002375,PGSC0003DMT400003228,PGSC0003DMT400003784,PGSC0003DMT400003796,PGSC0003DMT400004063,PGSC0003DMT400005512,PGSC0003DMT400005532,PGSC0003DMT400005547,PGSC0003DMT400005558,PGSC0003DMT400005571,PGSC0003DMT400007511,PGSC0003DMT400008044,PGSC0003DMT400008264,PGSC0003DMT400008560,PGSC0003DMT400009328,…	BP	0.00015	0.000790909	105	1563
GO:1901700	response to oxygen-containing compound	PGSC0003DMT400000192,PGSC0003DMT400000985,PGSC0003DMT400003796,PGSC0003DMT400004695,PGSC0003DMT400005512,PGSC0003DMT400008264,PGSC0003DMT400008560,PGSC0003DMT400008586,PGSC0003DMT400011627,PGSC0003DMT400011661,PGSC0003DMT400015306,PGSC0003DMT400015828,PGSC0003DMT400016998,PGSC0003DMT400018643,PGSC0003DMT400022039,PGSC0003DMT400023336,PGSC0003DMT400023459,PGSC0003DMT400024632,PGSC0003DMT400028622,…	BP	0.00019	0.000972353	42	490
GO:0003743	translation initiation factor activity	PGSC0003DMT400007325,PGSC0003DMT400011661,PGSC0003DMT400034911,PGSC0003DMT400043056,PGSC0003DMT400044186,PGSC0003DMT400049575,PGSC0003DMT400060836,PGSC0003DMT400063132,PGSC0003DMT400076704,PGSC0003DMT400078293	MF	0.00019	0.000981667	10	49
GO:0009651	response to salt stress	PGSC0003DMT400000336,PGSC0003DMT400000985,PGSC0003DMT400003796,PGSC0003DMT400008264,PGSC0003DMT400018643,PGSC0003DMT400023459,PGSC0003DMT400028622,PGSC0003DMT400036349,PGSC0003DMT400037472,PGSC0003DMT400044362,PGSC0003DMT400063510,PGSC0003DMT400064306,PGSC0003DMT400069921,PGSC0003DMT400071048,PGSC0003DMT400097756	BP	0.0002	0.000994286	15	108
GO:0044267	cellular protein metabolic process	PGSC0003DMT400000192,PGSC0003DMT400000336,PGSC0003DMT400000946,PGSC0003DMT400002312,PGSC0003DMT400005512,PGSC0003DMT400007325,PGSC0003DMT400008560,PGSC0003DMT400010881,PGSC0003DMT400010985,PGSC0003DMT400011562,PGSC0003DMT400011661,PGSC0003DMT400014493,PGSC0003DMT400014816,PGSC0003DMT400015306,PGSC0003DMT400016998,PGSC0003DMT400021388,PGSC0003DMT400022039,PGSC0003DMT400022072,PGSC0003DMT400022987,…	BP	0.00021	0.001015	64	852
GO:0008143	poly(A) binding	PGSC0003DMT400013036,PGSC0003DMT400020621,PGSC0003DMT400029379,PGSC0003DMT400057203	MF	0.00023	0.000950667	4	7
GO:0070717	poly-purine tract binding	PGSC0003DMT400013036,PGSC0003DMT400020621,PGSC0003DMT400029379,PGSC0003DMT400057203	MF	0.00023	0.000950667	4	7
GO:0009642	response to light intensity	PGSC0003DMT400008264,PGSC0003DMT400018728,PGSC0003DMT400022039,PGSC0003DMT400023459,PGSC0003DMT400042742,PGSC0003DMT400066554,PGSC0003DMT400067858,PGSC0003DMT400083158	BP	0.00032	0.0014848	8	37
GO:0006970	response to osmotic stress	PGSC0003DMT400000336,PGSC0003DMT400000985,PGSC0003DMT400003796,PGSC0003DMT400008264,PGSC0003DMT400018643,PGSC0003DMT400023459,PGSC0003DMT400028622,PGSC0003DMT400036349,PGSC0003DMT400037472,PGSC0003DMT400044362,PGSC0003DMT400063510,PGSC0003DMT400064306,PGSC0003DMT400069921,PGSC0003DMT400071048,PGSC0003DMT400073289,PGSC0003DMT400078673,PGSC0003DMT400097756	BP	0.00032	0.0014848	17	137
GO:0016604	nuclear body	PGSC0003DMT400010908,PGSC0003DMT400012169,PGSC0003DMT400022039,PGSC0003DMT400033081,PGSC0003DMT400045694,PGSC0003DMT400046635,PGSC0003DMT400055636,PGSC0003DMT400058471,PGSC0003DMT400059978,PGSC0003DMT400060223,PGSC0003DMT400078022	CC	0.00038	0.0006384	11	64
GO:0048583	regulation of response to stimulus	PGSC0003DMT400000985,PGSC0003DMT400003796,PGSC0003DMT400008044,PGSC0003DMT400008264,PGSC0003DMT400009328,PGSC0003DMT400011627,PGSC0003DMT400022039,PGSC0003DMT400023459,PGSC0003DMT400023971,PGSC0003DMT400024632,PGSC0003DMT400028812,PGSC0003DMT400037472,PGSC0003DMT400039303,PGSC0003DMT400040064,PGSC0003DMT400047079,PGSC0003DMT400058735,PGSC0003DMT400064306,PGSC0003DMT400069921,PGSC0003DMT400075895,…	BP	0.0004	0.00178462	24	234
GO:0034059	response to anoxia	PGSC0003DMT400018798,PGSC0003DMT400023336,PGSC0003DMT400025712	BP	0.00043	0.0018705	3	4
GO:0047893	flavonol 3-O-glucosyltransferase activity	PGSC0003DMT400034122,PGSC0003DMT400063297,PGSC0003DMT400066567,PGSC0003DMT400066569	MF	0.00044	0.001364	4	8
GO:0102360	daphnetin 3-O-glucosyltransferase activity	PGSC0003DMT400034122,PGSC0003DMT400063297,PGSC0003DMT400066567,PGSC0003DMT400066569	MF	0.00044	0.001364	4	8
GO:0102425	myricetin 3-O-glucosyltransferase activity	PGSC0003DMT400034122,PGSC0003DMT400063297,PGSC0003DMT400066567,PGSC0003DMT400066569	MF	0.00044	0.001364	4	8
GO:0009734	auxin-activated signaling pathway	PGSC0003DMT400000365,PGSC0003DMT400003228,PGSC0003DMT400003784,PGSC0003DMT400004063,PGSC0003DMT400005532,PGSC0003DMT400005547,PGSC0003DMT400005558,PGSC0003DMT400005571,PGSC0003DMT400009439,PGSC0003DMT400015610,PGSC0003DMT400023971,PGSC0003DMT400028619,PGSC0003DMT400034486,PGSC0003DMT400036094,PGSC0003DMT400036765,PGSC0003DMT400038054,PGSC0003DMT400039303,PGSC0003DMT400063955,PGSC0003DMT400064306,…	BP	0.00053	0.00224927	25	253
GO:0043412	macromolecule modification	PGSC0003DMT400000192,PGSC0003DMT400000336,PGSC0003DMT400001746,PGSC0003DMT400002312,PGSC0003DMT400005512,PGSC0003DMT400008560,PGSC0003DMT400010881,PGSC0003DMT400010985,PGSC0003DMT400011022,PGSC0003DMT400014493,PGSC0003DMT400014816,PGSC0003DMT400015306,PGSC0003DMT400016998,PGSC0003DMT400021388,PGSC0003DMT400022039,PGSC0003DMT400022072,PGSC0003DMT400022987,PGSC0003DMT400027542,PGSC0003DMT400032059,…	BP	0.00056	0.00232	52	679
GO:0071365	cellular response to auxin stimulus	PGSC0003DMT400000365,PGSC0003DMT400003228,PGSC0003DMT400003784,PGSC0003DMT400004063,PGSC0003DMT400005532,PGSC0003DMT400005547,PGSC0003DMT400005558,PGSC0003DMT400005571,PGSC0003DMT400009439,PGSC0003DMT400015610,PGSC0003DMT400023971,PGSC0003DMT400028619,PGSC0003DMT400034486,PGSC0003DMT400036094,PGSC0003DMT400036765,PGSC0003DMT400038054,PGSC0003DMT400039303,PGSC0003DMT400063955,PGSC0003DMT400064306,…	BP	0.00059	0.00238744	25	255
GO:0071478	cellular response to radiation	PGSC0003DMT400015828,PGSC0003DMT400023432,PGSC0003DMT400036075,PGSC0003DMT400042742,PGSC0003DMT400047079,PGSC0003DMT400058735,PGSC0003DMT400066554,PGSC0003DMT400066807,PGSC0003DMT400067540,PGSC0003DMT400078745	BP	0.00062	0.00245182	10	61
GO:0001101	response to acid chemical	PGSC0003DMT400000985,PGSC0003DMT400003796,PGSC0003DMT400005512,PGSC0003DMT400008264,PGSC0003DMT400008560,PGSC0003DMT400008586,PGSC0003DMT400011627,PGSC0003DMT400011661,PGSC0003DMT400015306,PGSC0003DMT400015828,PGSC0003DMT400016998,PGSC0003DMT400018643,PGSC0003DMT400023459,PGSC0003DMT400024632,PGSC0003DMT400028622,PGSC0003DMT400028812,PGSC0003DMT400036094,PGSC0003DMT400036349,PGSC0003DMT400037119,…	BP	0.00066	0.002552	35	408
GO:0009987	cellular process	PGSC0003DMT400000152,PGSC0003DMT400000186,PGSC0003DMT400000192,PGSC0003DMT400000336,PGSC0003DMT400000365,PGSC0003DMT400000447,PGSC0003DMT400000553,PGSC0003DMT400000764,PGSC0003DMT400000946,PGSC0003DMT400001746,PGSC0003DMT400001821,PGSC0003DMT400002312,PGSC0003DMT400002341,PGSC0003DMT400002375,PGSC0003DMT400002555,PGSC0003DMT400002558,PGSC0003DMT400002866,PGSC0003DMT400003228,PGSC0003DMT400003537,…	BP	0.00068	0.00257217	300	5562
GO:0005488	binding	PGSC0003DMT400000186,PGSC0003DMT400000192,PGSC0003DMT400000266,PGSC0003DMT400000336,PGSC0003DMT400000536,PGSC0003DMT400000946,PGSC0003DMT400000985,PGSC0003DMT400001661,PGSC0003DMT400001746,PGSC0003DMT400001821,PGSC0003DMT400002312,PGSC0003DMT400002341,PGSC0003DMT400002375,PGSC0003DMT400002555,PGSC0003DMT400002790,PGSC0003DMT400002877,PGSC0003DMT400003226,PGSC0003DMT400003796,PGSC0003DMT400004369,…	MF	0.00071	0.00183417	386	6741
GO:0034605	cellular response to heat	PGSC0003DMT400018798,PGSC0003DMT400020621,PGSC0003DMT400023336,PGSC0003DMT400025712,PGSC0003DMT400051809	BP	0.00073	0.00270255	5	16
GO:0003727	single-stranded RNA binding	PGSC0003DMT400013036,PGSC0003DMT400020621,PGSC0003DMT400029379,PGSC0003DMT400057203	MF	0.00076	0.00181231	4	9
GO:0009966	regulation of signal transduction	PGSC0003DMT400011627,PGSC0003DMT400023459,PGSC0003DMT400023971,PGSC0003DMT400024632,PGSC0003DMT400028812,PGSC0003DMT400037472,PGSC0003DMT400039303,PGSC0003DMT400040064,PGSC0003DMT400047079,PGSC0003DMT400064306,PGSC0003DMT400069921,PGSC0003DMT400075895,PGSC0003DMT400076840,PGSC0003DMT400076977,PGSC0003DMT400078673	BP	0.00077	0.00276247	15	122
GO:0023051	regulation of signaling	PGSC0003DMT400011627,PGSC0003DMT400023459,PGSC0003DMT400023971,PGSC0003DMT400024632,PGSC0003DMT400028812,PGSC0003DMT400037472,PGSC0003DMT400039303,PGSC0003DMT400040064,PGSC0003DMT400047079,PGSC0003DMT400064306,PGSC0003DMT400069921,PGSC0003DMT400075895,PGSC0003DMT400076840,PGSC0003DMT400076977,PGSC0003DMT400078673	BP	0.00077	0.00276247	15	122
GO:0010646	regulation of cell communication	PGSC0003DMT400011627,PGSC0003DMT400023459,PGSC0003DMT400023971,PGSC0003DMT400024632,PGSC0003DMT400028812,PGSC0003DMT400037472,PGSC0003DMT400039303,PGSC0003DMT400040064,PGSC0003DMT400047079,PGSC0003DMT400064306,PGSC0003DMT400069921,PGSC0003DMT400075895,PGSC0003DMT400076840,PGSC0003DMT400076977,PGSC0003DMT400078673	BP	0.00084	0.0029232	15	123
GO:0044260	cellular macromolecule metabolic process	PGSC0003DMT400000192,PGSC0003DMT400000336,PGSC0003DMT400000946,PGSC0003DMT400002312,PGSC0003DMT400003796,PGSC0003DMT400005512,PGSC0003DMT400007325,PGSC0003DMT400008560,PGSC0003DMT400010881,PGSC0003DMT400010985,PGSC0003DMT400011022,PGSC0003DMT400011562,PGSC0003DMT400011661,PGSC0003DMT400014493,PGSC0003DMT400014816,PGSC0003DMT400015306,PGSC0003DMT400015483,PGSC0003DMT400016998,PGSC0003DMT400021388,…	BP	0.00097	0.00330941	87	1311
GO:0006464	cellular protein modification process	PGSC0003DMT400000192,PGSC0003DMT400000336,PGSC0003DMT400002312,PGSC0003DMT400005512,PGSC0003DMT400008560,PGSC0003DMT400010881,PGSC0003DMT400010985,PGSC0003DMT400014493,PGSC0003DMT400014816,PGSC0003DMT400015306,PGSC0003DMT400016998,PGSC0003DMT400021388,PGSC0003DMT400022039,PGSC0003DMT400022072,PGSC0003DMT400022987,PGSC0003DMT400027542,PGSC0003DMT400032059,PGSC0003DMT400034896,PGSC0003DMT400034897,…	BP	0.00103	0.00341371	48	630
GO:0036211	protein modification process	PGSC0003DMT400000192,PGSC0003DMT400000336,PGSC0003DMT400002312,PGSC0003DMT400005512,PGSC0003DMT400008560,PGSC0003DMT400010881,PGSC0003DMT400010985,PGSC0003DMT400014493,PGSC0003DMT400014816,PGSC0003DMT400015306,PGSC0003DMT400016998,PGSC0003DMT400021388,PGSC0003DMT400022039,PGSC0003DMT400022072,PGSC0003DMT400022987,PGSC0003DMT400027542,PGSC0003DMT400032059,PGSC0003DMT400034896,PGSC0003DMT400034897,…	BP	0.00103	0.00341371	48	630
GO:0006807	nitrogen compound metabolic process	PGSC0003DMT400000192,PGSC0003DMT400000336,PGSC0003DMT400000447,PGSC0003DMT400000764,PGSC0003DMT400000946,PGSC0003DMT400001746,PGSC0003DMT400001821,PGSC0003DMT400002312,PGSC0003DMT400002558,PGSC0003DMT400002866,PGSC0003DMT400003796,PGSC0003DMT400005512,PGSC0003DMT400007325,PGSC0003DMT400008034,PGSC0003DMT400008103,PGSC0003DMT400008560,PGSC0003DMT400009551,PGSC0003DMT400010881,PGSC0003DMT400010908,…	BP	0.00116	0.00373778	152	2547
GO:0009408	response to heat	PGSC0003DMT400008264,PGSC0003DMT400018798,PGSC0003DMT400020621,PGSC0003DMT400023336,PGSC0003DMT400025712,PGSC0003DMT400033475,PGSC0003DMT400051809,PGSC0003DMT400055930	BP	0.00125	0.00395455	8	45
GO:0009639	response to red or far red light	PGSC0003DMT400008044,PGSC0003DMT400009328,PGSC0003DMT400022039,PGSC0003DMT400036075,PGSC0003DMT400044562,PGSC0003DMT400047079,PGSC0003DMT400058735,PGSC0003DMT400066807,PGSC0003DMT400067540	BP	0.00134	0.00416357	9	56
GO:0043170	macromolecule metabolic process	PGSC0003DMT400000192,PGSC0003DMT400000336,PGSC0003DMT400000946,PGSC0003DMT400001746,PGSC0003DMT400001821,PGSC0003DMT400002312,PGSC0003DMT400003537,PGSC0003DMT400003796,PGSC0003DMT400005512,PGSC0003DMT400007325,PGSC0003DMT400008560,PGSC0003DMT400010881,PGSC0003DMT400010908,PGSC0003DMT400010985,PGSC0003DMT400011022,PGSC0003DMT400011562,PGSC0003DMT400011661,PGSC0003DMT400012169,PGSC0003DMT400012431,…	BP	0.00135	0.00412105	128	2092
GO:0006397	mRNA processing	PGSC0003DMT400001821,PGSC0003DMT400010908,PGSC0003DMT400012169,PGSC0003DMT400012431,PGSC0003DMT400013036,PGSC0003DMT400015074,PGSC0003DMT400018531,PGSC0003DMT400020621,PGSC0003DMT400029379,PGSC0003DMT400033081,PGSC0003DMT400042233,PGSC0003DMT400044280,PGSC0003DMT400045694,PGSC0003DMT400046377,PGSC0003DMT400046635,PGSC0003DMT400049607,PGSC0003DMT400054608,PGSC0003DMT400055636,PGSC0003DMT400057203,…	BP	0.00156	0.00468	23	243
GO:0009507	chloroplast	PGSC0003DMT400000446,PGSC0003DMT400000447,PGSC0003DMT400000946,PGSC0003DMT400001064,PGSC0003DMT400001470,PGSC0003DMT400001646,PGSC0003DMT400002341,PGSC0003DMT400002555,PGSC0003DMT400002558,PGSC0003DMT400002866,PGSC0003DMT400002877,PGSC0003DMT400003958,PGSC0003DMT400004369,PGSC0003DMT400004981,PGSC0003DMT400008034,PGSC0003DMT400008103,PGSC0003DMT400008264,PGSC0003DMT400008502,PGSC0003DMT400010985,…	CC	0.00162	0.00261692	100	1468
GO:0006139	nucleobase-containing compound metabolic process	PGSC0003DMT400001746,PGSC0003DMT400001821,PGSC0003DMT400002558,PGSC0003DMT400003796,PGSC0003DMT400008103,PGSC0003DMT400010908,PGSC0003DMT400011022,PGSC0003DMT400012169,PGSC0003DMT400012431,PGSC0003DMT400013036,PGSC0003DMT400015074,PGSC0003DMT400015282,PGSC0003DMT400015483,PGSC0003DMT400018531,PGSC0003DMT400020621,PGSC0003DMT400022039,PGSC0003DMT400023432,PGSC0003DMT400023459,PGSC0003DMT400026053,…	BP	0.00191	0.00563288	67	979
GO:0009536	plastid	PGSC0003DMT400000446,PGSC0003DMT400000447,PGSC0003DMT400000946,PGSC0003DMT400001064,PGSC0003DMT400001470,PGSC0003DMT400001646,PGSC0003DMT400002341,PGSC0003DMT400002555,PGSC0003DMT400002558,PGSC0003DMT400002866,PGSC0003DMT400002877,PGSC0003DMT400003958,PGSC0003DMT400004369,PGSC0003DMT400004981,PGSC0003DMT400008034,PGSC0003DMT400008103,PGSC0003DMT400008264,PGSC0003DMT400008502,PGSC0003DMT400010985,…	CC	0.00193	0.00300222	100	1476
GO:0071396	cellular response to lipid	PGSC0003DMT400005512,PGSC0003DMT400008560,PGSC0003DMT400011627,PGSC0003DMT400011661,PGSC0003DMT400015306,PGSC0003DMT400016998,PGSC0003DMT400018643,PGSC0003DMT400023459,PGSC0003DMT400028622,PGSC0003DMT400028812,PGSC0003DMT400036094,PGSC0003DMT400037119,PGSC0003DMT400037120,PGSC0003DMT400037121,PGSC0003DMT400037472,PGSC0003DMT400037716,PGSC0003DMT400040064,PGSC0003DMT400043501,PGSC0003DMT400049448,…	BP	0.00213	0.006177	22	234
GO:0071482	cellular response to light stimulus	PGSC0003DMT400015828,PGSC0003DMT400023432,PGSC0003DMT400036075,PGSC0003DMT400042742,PGSC0003DMT400047079,PGSC0003DMT400058735,PGSC0003DMT400066554,PGSC0003DMT400066807,PGSC0003DMT400067540	BP	0.0022	0.00627541	9	60
GO:0033993	response to lipid	PGSC0003DMT400005512,PGSC0003DMT400008560,PGSC0003DMT400011627,PGSC0003DMT400011661,PGSC0003DMT400015306,PGSC0003DMT400016998,PGSC0003DMT400018643,PGSC0003DMT400022039,PGSC0003DMT400023459,PGSC0003DMT400028622,PGSC0003DMT400028812,PGSC0003DMT400036094,PGSC0003DMT400037119,PGSC0003DMT400037120,PGSC0003DMT400037121,PGSC0003DMT400037472,PGSC0003DMT400037716,PGSC0003DMT400040064,PGSC0003DMT400043501,…	BP	0.00231	0.0064829	26	296
GO:0071229	cellular response to acid chemical	PGSC0003DMT400005512,PGSC0003DMT400008560,PGSC0003DMT400011627,PGSC0003DMT400011661,PGSC0003DMT400015306,PGSC0003DMT400015828,PGSC0003DMT400016998,PGSC0003DMT400018643,PGSC0003DMT400023459,PGSC0003DMT400024632,PGSC0003DMT400028812,PGSC0003DMT400036094,PGSC0003DMT400037119,PGSC0003DMT400037120,PGSC0003DMT400037121,PGSC0003DMT400037472,PGSC0003DMT400037716,PGSC0003DMT400040064,PGSC0003DMT400043501,…	BP	0.00251	0.00693238	23	252
GO:0071214	cellular response to abiotic stimulus	PGSC0003DMT400015828,PGSC0003DMT400023432,PGSC0003DMT400036075,PGSC0003DMT400042742,PGSC0003DMT400047079,PGSC0003DMT400058735,PGSC0003DMT400066554,PGSC0003DMT400066807,PGSC0003DMT400067540,PGSC0003DMT400078673,PGSC0003DMT400078745	BP	0.00252	0.00679814	11	85
GO:0104004	cellular response to environmental stimulus	PGSC0003DMT400015828,PGSC0003DMT400023432,PGSC0003DMT400036075,PGSC0003DMT400042742,PGSC0003DMT400047079,PGSC0003DMT400058735,PGSC0003DMT400066554,PGSC0003DMT400066807,PGSC0003DMT400067540,PGSC0003DMT400078673,PGSC0003DMT400078745	BP	0.00252	0.00679814	11	85
GO:0005507	copper ion binding	PGSC0003DMT400018798,PGSC0003DMT400023336,PGSC0003DMT400025712	MF	0.00254	0.00562429	3	6
GO:0019538	protein metabolic process	PGSC0003DMT400000192,PGSC0003DMT400000336,PGSC0003DMT400000946,PGSC0003DMT400002312,PGSC0003DMT400005512,PGSC0003DMT400007325,PGSC0003DMT400008560,PGSC0003DMT400010881,PGSC0003DMT400010985,PGSC0003DMT400011562,PGSC0003DMT400011661,PGSC0003DMT400014351,PGSC0003DMT400014352,PGSC0003DMT400014493,PGSC0003DMT400014816,PGSC0003DMT400015306,PGSC0003DMT400016998,PGSC0003DMT400017634,PGSC0003DMT400017635,…	BP	0.00289	0.00761909	77	1176
GO:0071215	cellular response to abscisic acid stimulus	PGSC0003DMT400005512,PGSC0003DMT400011627,PGSC0003DMT400011661,PGSC0003DMT400015306,PGSC0003DMT400016998,PGSC0003DMT400018643,PGSC0003DMT400023459,PGSC0003DMT400028812,PGSC0003DMT400036094,PGSC0003DMT400037119,PGSC0003DMT400037120,PGSC0003DMT400037121,PGSC0003DMT400037472,PGSC0003DMT400043501,PGSC0003DMT400071048,PGSC0003DMT400075895,PGSC0003DMT400076840	BP	0.00293	0.00755289	17	167
GO:0097306	cellular response to alcohol	PGSC0003DMT400005512,PGSC0003DMT400011627,PGSC0003DMT400011661,PGSC0003DMT400015306,PGSC0003DMT400016998,PGSC0003DMT400018643,PGSC0003DMT400023459,PGSC0003DMT400028812,PGSC0003DMT400036094,PGSC0003DMT400037119,PGSC0003DMT400037120,PGSC0003DMT400037121,PGSC0003DMT400037472,PGSC0003DMT400043501,PGSC0003DMT400071048,PGSC0003DMT400075895,PGSC0003DMT400076840	BP	0.00293	0.00755289	17	167
GO:0048585	negative regulation of response to stimulus	PGSC0003DMT400008044,PGSC0003DMT400009328,PGSC0003DMT400011627,PGSC0003DMT400023459,PGSC0003DMT400023971,PGSC0003DMT400047079,PGSC0003DMT400064306,PGSC0003DMT400069921,PGSC0003DMT400075895,PGSC0003DMT400076840,PGSC0003DMT400076977,PGSC0003DMT400097756	BP	0.00312	0.00786783	12	100
GO:0034641	cellular nitrogen compound metabolic process	PGSC0003DMT400000447,PGSC0003DMT400000946,PGSC0003DMT400001746,PGSC0003DMT400001821,PGSC0003DMT400002558,PGSC0003DMT400002866,PGSC0003DMT400003796,PGSC0003DMT400007325,PGSC0003DMT400008034,PGSC0003DMT400008103,PGSC0003DMT400010908,PGSC0003DMT400011022,PGSC0003DMT400011661,PGSC0003DMT400012169,PGSC0003DMT400012431,PGSC0003DMT400013036,PGSC0003DMT400015074,PGSC0003DMT400015282,PGSC0003DMT400015483,…	BP	0.00329	0.008178	84	1310
GO:0016071	mRNA metabolic process	PGSC0003DMT400001821,PGSC0003DMT400010908,PGSC0003DMT400012169,PGSC0003DMT400012431,PGSC0003DMT400013036,PGSC0003DMT400015074,PGSC0003DMT400018531,PGSC0003DMT400020621,PGSC0003DMT400029379,PGSC0003DMT400033081,PGSC0003DMT400042233,PGSC0003DMT400044280,PGSC0003DMT400045694,PGSC0003DMT400046377,PGSC0003DMT400046635,PGSC0003DMT400049607,PGSC0003DMT400054608,PGSC0003DMT400055636,PGSC0003DMT400057203,…	BP	0.00333	0.00816085	24	273
GO:0009738	abscisic acid-activated signaling pathway	PGSC0003DMT400005512,PGSC0003DMT400011627,PGSC0003DMT400011661,PGSC0003DMT400015306,PGSC0003DMT400016998,PGSC0003DMT400018643,PGSC0003DMT400023459,PGSC0003DMT400028812,PGSC0003DMT400036094,PGSC0003DMT400037119,PGSC0003DMT400037120,PGSC0003DMT400037121,PGSC0003DMT400037472,PGSC0003DMT400071048,PGSC0003DMT400075895,PGSC0003DMT400076840	BP	0.00335	0.00809583	16	155
GO:0044238	primary metabolic process	PGSC0003DMT400000152,PGSC0003DMT400000192,PGSC0003DMT400000336,PGSC0003DMT400000764,PGSC0003DMT400000946,PGSC0003DMT400001746,PGSC0003DMT400001821,PGSC0003DMT400002312,PGSC0003DMT400002555,PGSC0003DMT400002558,PGSC0003DMT400003537,PGSC0003DMT400003796,PGSC0003DMT400005512,PGSC0003DMT400007125,PGSC0003DMT400007325,PGSC0003DMT400007615,PGSC0003DMT400008103,PGSC0003DMT400008264,PGSC0003DMT400008560,…	BP	0.00336	0.00800877	194	3446
GO:0016607	nuclear speck	PGSC0003DMT400010908,PGSC0003DMT400033081,PGSC0003DMT400045694,PGSC0003DMT400046635,PGSC0003DMT400055636,PGSC0003DMT400059978,PGSC0003DMT400060223,PGSC0003DMT400078022	CC	0.00372	0.00558	8	50
GO:0009737	response to abscisic acid	PGSC0003DMT400005512,PGSC0003DMT400011627,PGSC0003DMT400011661,PGSC0003DMT400015306,PGSC0003DMT400016998,PGSC0003DMT400018643,PGSC0003DMT400023459,PGSC0003DMT400028622,PGSC0003DMT400028812,PGSC0003DMT400036094,PGSC0003DMT400037119,PGSC0003DMT400037120,PGSC0003DMT400037121,PGSC0003DMT400037472,PGSC0003DMT400043501,PGSC0003DMT400047537,PGSC0003DMT400070362,PGSC0003DMT400071048,PGSC0003DMT400075895,…	BP	0.00377	0.00886459	20	215
GO:0046872	metal ion binding	PGSC0003DMT400000536,PGSC0003DMT400002341,PGSC0003DMT400002555,PGSC0003DMT400004695,PGSC0003DMT400004981,PGSC0003DMT400004999,PGSC0003DMT400005512,PGSC0003DMT400006421,PGSC0003DMT400006927,PGSC0003DMT400006974,PGSC0003DMT400007173,PGSC0003DMT400007736,PGSC0003DMT400007737,PGSC0003DMT400008044,PGSC0003DMT400009175,PGSC0003DMT400009328,PGSC0003DMT400009629,PGSC0003DMT400010985,PGSC0003DMT400011163,…	MF	0.00412	0.00851467	161	2565
GO:0043169	cation binding	PGSC0003DMT400000536,PGSC0003DMT400002341,PGSC0003DMT400002555,PGSC0003DMT400004695,PGSC0003DMT400004981,PGSC0003DMT400004999,PGSC0003DMT400005512,PGSC0003DMT400006421,PGSC0003DMT400006927,PGSC0003DMT400006974,PGSC0003DMT400007173,PGSC0003DMT400007736,PGSC0003DMT400007737,PGSC0003DMT400008044,PGSC0003DMT400009175,PGSC0003DMT400009328,PGSC0003DMT400009629,PGSC0003DMT400010985,PGSC0003DMT400011163,…	MF	0.00419	0.00811813	161	2566
GO:0008135	translation factor activity, RNA binding	PGSC0003DMT400007325,PGSC0003DMT400011661,PGSC0003DMT400034911,PGSC0003DMT400043056,PGSC0003DMT400044186,PGSC0003DMT400049575,PGSC0003DMT400060836,PGSC0003DMT400063132,PGSC0003DMT400076704,PGSC0003DMT400078293	MF	0.00455	0.00829706	10	73
GO:0009414	response to water deprivation	PGSC0003DMT400000985,PGSC0003DMT400003796,PGSC0003DMT400008264,PGSC0003DMT400011627,PGSC0003DMT400015828,PGSC0003DMT400023459,PGSC0003DMT400036349,PGSC0003DMT400044362,PGSC0003DMT400047537,PGSC0003DMT400063510,PGSC0003DMT400071048	BP	0.0047	0.010904	11	92
GO:2000030	regulation of response to red or far red light	PGSC0003DMT400008044,PGSC0003DMT400009328,PGSC0003DMT400022039,PGSC0003DMT400047079	BP	0.00483	0.0110582	4	15
GO:0036293	response to decreased oxygen levels	PGSC0003DMT400018798,PGSC0003DMT400023336,PGSC0003DMT400025712	BP	0.00526	0.0118095	3	8
GO:0070482	response to oxygen levels	PGSC0003DMT400018798,PGSC0003DMT400023336,PGSC0003DMT400025712	BP	0.00526	0.0118095	3	8
GO:0044451	nucleoplasm part	PGSC0003DMT400000859,PGSC0003DMT400010908,PGSC0003DMT400012169,PGSC0003DMT400022039,PGSC0003DMT400033081,PGSC0003DMT400045694,PGSC0003DMT400046635,PGSC0003DMT400055636,PGSC0003DMT400058471,PGSC0003DMT400059978,PGSC0003DMT400060223,PGSC0003DMT400067536,PGSC0003DMT400077392,PGSC0003DMT400078022	CC	0.00569	0.00824069	14	127
GO:0090304	nucleic acid metabolic process	PGSC0003DMT400001746,PGSC0003DMT400001821,PGSC0003DMT400003796,PGSC0003DMT400010908,PGSC0003DMT400011022,PGSC0003DMT400012169,PGSC0003DMT400012431,PGSC0003DMT400013036,PGSC0003DMT400015074,PGSC0003DMT400015483,PGSC0003DMT400018531,PGSC0003DMT400020621,PGSC0003DMT400023432,PGSC0003DMT400023459,PGSC0003DMT400029379,PGSC0003DMT400032941,PGSC0003DMT400033081,PGSC0003DMT400037716,PGSC0003DMT400039303,…	BP	0.00571	0.0124974	50	721
GO:0000160	phosphorelay signal transduction system	PGSC0003DMT400002375,PGSC0003DMT400007511,PGSC0003DMT400010296,PGSC0003DMT400010297,PGSC0003DMT400012547,PGSC0003DMT400021312,PGSC0003DMT400024508,PGSC0003DMT400029402,PGSC0003DMT400035731,PGSC0003DMT400060160,PGSC0003DMT400063187,PGSC0003DMT400067472,PGSC0003DMT400068726,PGSC0003DMT400068727,PGSC0003DMT400068959,PGSC0003DMT400076840,PGSC0003DMT400076977,PGSC0003DMT400086995,PGSC0003DMT400090475	BP	0.00571	0.0124974	19	208
GO:0016070	RNA metabolic process	PGSC0003DMT400001746,PGSC0003DMT400001821,PGSC0003DMT400003796,PGSC0003DMT400010908,PGSC0003DMT400011022,PGSC0003DMT400012169,PGSC0003DMT400012431,PGSC0003DMT400013036,PGSC0003DMT400015074,PGSC0003DMT400018531,PGSC0003DMT400020621,PGSC0003DMT400023432,PGSC0003DMT400023459,PGSC0003DMT400029379,PGSC0003DMT400033081,PGSC0003DMT400037716,PGSC0003DMT400039303,PGSC0003DMT400042233,PGSC0003DMT400044280,…	BP	0.00603	0.0129533	41	567
GO:0016567	protein ubiquitination	PGSC0003DMT400002312,PGSC0003DMT400005512,PGSC0003DMT400008560,PGSC0003DMT400010881,PGSC0003DMT400014816,PGSC0003DMT400015306,PGSC0003DMT400016998,PGSC0003DMT400027542,PGSC0003DMT400036075,PGSC0003DMT400038537,PGSC0003DMT400042138,PGSC0003DMT400044280,PGSC0003DMT400047866,PGSC0003DMT400054947,PGSC0003DMT400054948,PGSC0003DMT400054949,PGSC0003DMT400055045,PGSC0003DMT400055050,PGSC0003DMT400056773,…	BP	0.00618	0.0131137	29	367
GO:1901701	cellular response to oxygen-containing compound	PGSC0003DMT400000192,PGSC0003DMT400005512,PGSC0003DMT400008560,PGSC0003DMT400011627,PGSC0003DMT400011661,PGSC0003DMT400015306,PGSC0003DMT400015828,PGSC0003DMT400016998,PGSC0003DMT400018643,PGSC0003DMT400023459,PGSC0003DMT400024632,PGSC0003DMT400028622,PGSC0003DMT400028812,PGSC0003DMT400036094,PGSC0003DMT400037119,PGSC0003DMT400037120,PGSC0003DMT400037121,PGSC0003DMT400037472,PGSC0003DMT400037716,…	BP	0.00627	0.0131443	25	303
GO:0009415	response to water	PGSC0003DMT400000985,PGSC0003DMT400003796,PGSC0003DMT400008264,PGSC0003DMT400011627,PGSC0003DMT400015828,PGSC0003DMT400023459,PGSC0003DMT400036349,PGSC0003DMT400044362,PGSC0003DMT400047537,PGSC0003DMT400063510,PGSC0003DMT400071048	BP	0.00649	0.0134436	11	96
GO:0097305	response to alcohol	PGSC0003DMT400005512,PGSC0003DMT400011627,PGSC0003DMT400011661,PGSC0003DMT400015306,PGSC0003DMT400016998,PGSC0003DMT400018643,PGSC0003DMT400023459,PGSC0003DMT400028622,PGSC0003DMT400028812,PGSC0003DMT400036094,PGSC0003DMT400037119,PGSC0003DMT400037120,PGSC0003DMT400037121,PGSC0003DMT400037472,PGSC0003DMT400043501,PGSC0003DMT400047537,PGSC0003DMT400070362,PGSC0003DMT400071048,PGSC0003DMT400075895,…	BP	0.0069	0.0141247	20	227
GO:0010467	gene expression	PGSC0003DMT400000946,PGSC0003DMT400001746,PGSC0003DMT400001821,PGSC0003DMT400003796,PGSC0003DMT400007325,PGSC0003DMT400010908,PGSC0003DMT400011661,PGSC0003DMT400012169,PGSC0003DMT400012431,PGSC0003DMT400013036,PGSC0003DMT400015074,PGSC0003DMT400018531,PGSC0003DMT400020621,PGSC0003DMT400023432,PGSC0003DMT400023459,PGSC0003DMT400029379,PGSC0003DMT400033081,PGSC0003DMT400034911,PGSC0003DMT400037716,…	BP	0.00716	0.0144865	52	765
GO:0032446	protein modification by small protein conjugation	PGSC0003DMT400002312,PGSC0003DMT400005512,PGSC0003DMT400008560,PGSC0003DMT400010881,PGSC0003DMT400014816,PGSC0003DMT400015306,PGSC0003DMT400016998,PGSC0003DMT400027542,PGSC0003DMT400032059,PGSC0003DMT400036075,PGSC0003DMT400038537,PGSC0003DMT400042138,PGSC0003DMT400044280,PGSC0003DMT400047866,PGSC0003DMT400054947,PGSC0003DMT400054948,PGSC0003DMT400054949,PGSC0003DMT400055045,PGSC0003DMT400055050,…	BP	0.00731	0.01462	30	388
GO:0003676	nucleic acid binding	PGSC0003DMT400000266,PGSC0003DMT400001661,PGSC0003DMT400001746,PGSC0003DMT400002375,PGSC0003DMT400002790,PGSC0003DMT400003796,PGSC0003DMT400004369,PGSC0003DMT400006421,PGSC0003DMT400006590,PGSC0003DMT400006735,PGSC0003DMT400007325,PGSC0003DMT400007511,PGSC0003DMT400010296,PGSC0003DMT400010297,PGSC0003DMT400010908,PGSC0003DMT400011022,PGSC0003DMT400011163,PGSC0003DMT400011470,PGSC0003DMT400011661,…	MF	0.00755	0.0130028	121	1887
GO:0009873	ethylene-activated signaling pathway	PGSC0003DMT400002375,PGSC0003DMT400007511,PGSC0003DMT400010296,PGSC0003DMT400010297,PGSC0003DMT400012547,PGSC0003DMT400021312,PGSC0003DMT400024508,PGSC0003DMT400035731,PGSC0003DMT400060160,PGSC0003DMT400067472,PGSC0003DMT400068726,PGSC0003DMT400068727,PGSC0003DMT400068959,PGSC0003DMT400076840,PGSC0003DMT400076977,PGSC0003DMT400086995,PGSC0003DMT400090475	BP	0.00779	0.015403	17	184
GO:0010286	heat acclimation	PGSC0003DMT400008264,PGSC0003DMT400033475,PGSC0003DMT400051809,PGSC0003DMT400055930	BP	0.0078	0.0151642	4	17
GO:1901002	positive regulation of response to salt stress	PGSC0003DMT400000985,PGSC0003DMT400003796,PGSC0003DMT400008264,PGSC0003DMT400037472	BP	0.0078	0.0151642	4	17
GO:1990904	ribonucleoprotein complex	PGSC0003DMT400001746,PGSC0003DMT400002536,PGSC0003DMT400002890,PGSC0003DMT400006681,PGSC0003DMT400010908,PGSC0003DMT400011661,PGSC0003DMT400012169,PGSC0003DMT400013052,PGSC0003DMT400014351,PGSC0003DMT400015074,PGSC0003DMT400017646,PGSC0003DMT400018531,PGSC0003DMT400018728,PGSC0003DMT400020315,PGSC0003DMT400020621,PGSC0003DMT400022864,PGSC0003DMT400031863,PGSC0003DMT400033081,PGSC0003DMT400036807,…	CC	0.00803	0.011242	34	429
GO:0071369	cellular response to ethylene stimulus	PGSC0003DMT400002375,PGSC0003DMT400007511,PGSC0003DMT400010296,PGSC0003DMT400010297,PGSC0003DMT400012547,PGSC0003DMT400021312,PGSC0003DMT400024508,PGSC0003DMT400035731,PGSC0003DMT400060160,PGSC0003DMT400067472,PGSC0003DMT400068726,PGSC0003DMT400068727,PGSC0003DMT400068959,PGSC0003DMT400076840,PGSC0003DMT400076977,PGSC0003DMT400086995,PGSC0003DMT400090475	BP	0.00864	0.0165204	17	186
GO:0010928	regulation of auxin mediated signaling pathway	PGSC0003DMT400023971,PGSC0003DMT400039303,PGSC0003DMT400064306,PGSC0003DMT400069921,PGSC0003DMT400078673	BP	0.00867	0.0163976	5	27
GO:0070647	protein modification by small protein conjugation or removal	PGSC0003DMT400002312,PGSC0003DMT400005512,PGSC0003DMT400008560,PGSC0003DMT400010881,PGSC0003DMT400014816,PGSC0003DMT400015306,PGSC0003DMT400016998,PGSC0003DMT400027542,PGSC0003DMT400032059,PGSC0003DMT400036075,PGSC0003DMT400038537,PGSC0003DMT400042138,PGSC0003DMT400044280,PGSC0003DMT400047866,PGSC0003DMT400054947,PGSC0003DMT400054948,PGSC0003DMT400054949,PGSC0003DMT400055045,PGSC0003DMT400055050,…	BP	0.0087	0.0162774	30	393
GO:0004364	glutathione transferase activity	PGSC0003DMT400005532,PGSC0003DMT400005546,PGSC0003DMT400005547,PGSC0003DMT400005558,PGSC0003DMT400005571,PGSC0003DMT400028619,PGSC0003DMT400038054,PGSC0003DMT400043105	MF	0.00926	0.0151084	8	57
GO:0050366	tyramine N-feruloyltransferase activity	PGSC0003DMT400038285,PGSC0003DMT400038286,PGSC0003DMT400038291	MF	0.00949	0.0147095	3	9
GO:0048037	cofactor binding	PGSC0003DMT400006974,PGSC0003DMT400009175,PGSC0003DMT400010985,PGSC0003DMT400011522,PGSC0003DMT400021388,PGSC0003DMT400022039,PGSC0003DMT400022072,PGSC0003DMT400022987,PGSC0003DMT400034896,PGSC0003DMT400034897,PGSC0003DMT400034898,PGSC0003DMT400034902,PGSC0003DMT400035006,PGSC0003DMT400039303,PGSC0003DMT400044239,PGSC0003DMT400050232,PGSC0003DMT400054836,PGSC0003DMT400058325,PGSC0003DMT400065251,…	MF	0.01189	0.0175519	22	250
GO:0005654	nucleoplasm	PGSC0003DMT400000859,PGSC0003DMT400010908,PGSC0003DMT400012169,PGSC0003DMT400022039,PGSC0003DMT400025891,PGSC0003DMT400033081,PGSC0003DMT400045694,PGSC0003DMT400046635,PGSC0003DMT400049444,PGSC0003DMT400055636,PGSC0003DMT400058471,PGSC0003DMT400059978,PGSC0003DMT400060223,PGSC0003DMT400064159,PGSC0003DMT400067536,PGSC0003DMT400077392,PGSC0003DMT400078022	CC	0.01205	0.0163258	17	181
GO:0010608	posttranscriptional regulation of gene expression	PGSC0003DMT400011661,PGSC0003DMT400018531,PGSC0003DMT400034911,PGSC0003DMT400044186,PGSC0003DMT400049575,PGSC0003DMT400058471,PGSC0003DMT400060836,PGSC0003DMT400076704	BP	0.01267	0.023453	8	65
GO:0006883	cellular sodium ion homeostasis	PGSC0003DMT400008264,PGSC0003DMT400097756	BP	0.01315	0.0235887	2	4
GO:0009645	response to low light intensity stimulus	PGSC0003DMT400022039,PGSC0003DMT400083158	BP	0.01315	0.0235887	2	4
GO:0010099	regulation of photomorphogenesis	PGSC0003DMT400008044,PGSC0003DMT400009328	BP	0.01315	0.0235887	2	4
GO:0030004	cellular monovalent inorganic cation homeostasis	PGSC0003DMT400008264,PGSC0003DMT400097756	BP	0.01315	0.0235887	2	4
GO:0034644	cellular response to UV	PGSC0003DMT400042742,PGSC0003DMT400066554	BP	0.01315	0.0235887	2	4
GO:0006725	cellular aromatic compound metabolic process	PGSC0003DMT400000447,PGSC0003DMT400001746,PGSC0003DMT400001821,PGSC0003DMT400002558,PGSC0003DMT400002866,PGSC0003DMT400003796,PGSC0003DMT400008034,PGSC0003DMT400008103,PGSC0003DMT400009471,PGSC0003DMT400009551,PGSC0003DMT400010908,PGSC0003DMT400011022,PGSC0003DMT400012169,PGSC0003DMT400012431,PGSC0003DMT400013036,PGSC0003DMT400015074,PGSC0003DMT400015282,PGSC0003DMT400015483,PGSC0003DMT400018531,…	BP	0.01338	0.0232812	76	1232
GO:0031981	nuclear lumen	PGSC0003DMT400000859,PGSC0003DMT400001746,PGSC0003DMT400006590,PGSC0003DMT400006927,PGSC0003DMT400010908,PGSC0003DMT400012169,PGSC0003DMT400022039,PGSC0003DMT400025891,PGSC0003DMT400033081,PGSC0003DMT400039303,PGSC0003DMT400045694,PGSC0003DMT400046635,PGSC0003DMT400049444,PGSC0003DMT400051944,PGSC0003DMT400055636,PGSC0003DMT400058471,PGSC0003DMT400059978,PGSC0003DMT400060223,PGSC0003DMT400064159,…	CC	0.01379	0.0180994	23	273
GO:1901001	negative regulation of response to salt stress	PGSC0003DMT400064306,PGSC0003DMT400069921,PGSC0003DMT400097756	BP	0.0139	0.0239465	3	11
GO:0035556	intracellular signal transduction	PGSC0003DMT400002375,PGSC0003DMT400007511,PGSC0003DMT400010296,PGSC0003DMT400010297,PGSC0003DMT400012547,PGSC0003DMT400021312,PGSC0003DMT400024508,PGSC0003DMT400029402,PGSC0003DMT400035731,PGSC0003DMT400060160,PGSC0003DMT400063187,PGSC0003DMT400067472,PGSC0003DMT400068726,PGSC0003DMT400068727,PGSC0003DMT400068959,PGSC0003DMT400076840,PGSC0003DMT400076977,PGSC0003DMT400086995,PGSC0003DMT400090475	BP	0.01395	0.0237971	19	227
GO:0003723	RNA binding	PGSC0003DMT400001746,PGSC0003DMT400004369,PGSC0003DMT400007325,PGSC0003DMT400010908,PGSC0003DMT400011022,PGSC0003DMT400011163,PGSC0003DMT400011661,PGSC0003DMT400012169,PGSC0003DMT400012431,PGSC0003DMT400013036,PGSC0003DMT400015091,PGSC0003DMT400017646,PGSC0003DMT400020283,PGSC0003DMT400020315,PGSC0003DMT400020621,PGSC0003DMT400021046,PGSC0003DMT400029379,PGSC0003DMT400034911,PGSC0003DMT400042233,…	MF	0.0145	0.0204318	42	568
GO:0008380	RNA splicing	PGSC0003DMT400010908,PGSC0003DMT400012169,PGSC0003DMT400018531,PGSC0003DMT400033081,PGSC0003DMT400042233,PGSC0003DMT400044280,PGSC0003DMT400045694,PGSC0003DMT400046635,PGSC0003DMT400054608,PGSC0003DMT400055636,PGSC0003DMT400070583,PGSC0003DMT400078022,PGSC0003DMT400078069,PGSC0003DMT400084916	BP	0.01454	0.0245627	14	151
GO:0048584	positive regulation of response to stimulus	PGSC0003DMT400000985,PGSC0003DMT400003796,PGSC0003DMT400008264,PGSC0003DMT400022039,PGSC0003DMT400028812,PGSC0003DMT400037472,PGSC0003DMT400058735,PGSC0003DMT400064306,PGSC0003DMT400069921,PGSC0003DMT400078745	BP	0.01518	0.0253973	10	94
GO:0004421	hydroxymethylglutaryl-CoA synthase activity	PGSC0003DMT400010866,PGSC0003DMT400032619	MF	0.01534	0.0190216	2	4
GO:0009001	serine O-acetyltransferase activity	PGSC0003DMT400000764,PGSC0003DMT400057095	MF	0.01534	0.0190216	2	4
GO:0016412	serine O-acyltransferase activity	PGSC0003DMT400000764,PGSC0003DMT400057095	MF	0.01534	0.0190216	2	4
GO:0016413	O-acetyltransferase activity	PGSC0003DMT400000764,PGSC0003DMT400057095	MF	0.01534	0.0190216	2	4
GO:0046481	digalactosyldiacylglycerol synthase activity	PGSC0003DMT400000446,PGSC0003DMT400072563	MF	0.01534	0.0190216	2	4
GO:0044237	cellular metabolic process	PGSC0003DMT400000152,PGSC0003DMT400000186,PGSC0003DMT400000192,PGSC0003DMT400000336,PGSC0003DMT400000447,PGSC0003DMT400000553,PGSC0003DMT400000764,PGSC0003DMT400000946,PGSC0003DMT400001746,PGSC0003DMT400001821,PGSC0003DMT400002312,PGSC0003DMT400002341,PGSC0003DMT400002555,PGSC0003DMT400002558,PGSC0003DMT400002866,PGSC0003DMT400003537,PGSC0003DMT400003796,PGSC0003DMT400005512,PGSC0003DMT400006680,…	BP	0.0161	0.02668	223	4154
GO:0006417	regulation of translation	PGSC0003DMT400011661,PGSC0003DMT400034911,PGSC0003DMT400044186,PGSC0003DMT400049575,PGSC0003DMT400058471,PGSC0003DMT400060836,PGSC0003DMT400076704	BP	0.01615	0.0263859	7	55
GO:0034248	regulation of cellular amide metabolic process	PGSC0003DMT400011661,PGSC0003DMT400034911,PGSC0003DMT400044186,PGSC0003DMT400049575,PGSC0003DMT400058471,PGSC0003DMT400060836,PGSC0003DMT400076704	BP	0.01615	0.0263859	7	55
GO:0071704	organic substance metabolic process	PGSC0003DMT400000152,PGSC0003DMT400000192,PGSC0003DMT400000336,PGSC0003DMT400000447,PGSC0003DMT400000553,PGSC0003DMT400000764,PGSC0003DMT400000946,PGSC0003DMT400001746,PGSC0003DMT400001821,PGSC0003DMT400002312,PGSC0003DMT400002555,PGSC0003DMT400002558,PGSC0003DMT400002866,PGSC0003DMT400003537,PGSC0003DMT400003796,PGSC0003DMT400005512,PGSC0003DMT400007125,PGSC0003DMT400007325,PGSC0003DMT400007615,…	BP	0.01726	0.0278078	211	3913
GO:0006189	'de novo' IMP biosynthetic process	PGSC0003DMT400026512,PGSC0003DMT400034522,PGSC0003DMT400059281	BP	0.01788	0.0285424	3	12
GO:0005681	spliceosomal complex	PGSC0003DMT400010908,PGSC0003DMT400012169,PGSC0003DMT400018531,PGSC0003DMT400033081,PGSC0003DMT400044280,PGSC0003DMT400045694,PGSC0003DMT400055636,PGSC0003DMT400078022,PGSC0003DMT400078069,PGSC0003DMT400084916	CC	0.01832	0.0233164	10	91
GO:0009968	negative regulation of signal transduction	PGSC0003DMT400023459,PGSC0003DMT400023971,PGSC0003DMT400047079,PGSC0003DMT400075895,PGSC0003DMT400076840,PGSC0003DMT400076977	BP	0.01843	0.0287607	6	44
GO:0010648	negative regulation of cell communication	PGSC0003DMT400023459,PGSC0003DMT400023971,PGSC0003DMT400047079,PGSC0003DMT400075895,PGSC0003DMT400076840,PGSC0003DMT400076977	BP	0.01843	0.0287607	6	44
GO:0023057	negative regulation of signaling	PGSC0003DMT400023459,PGSC0003DMT400023971,PGSC0003DMT400047079,PGSC0003DMT400075895,PGSC0003DMT400076840,PGSC0003DMT400076977	BP	0.01843	0.0287607	6	44
GO:0048511	rhythmic process	PGSC0003DMT400004130,PGSC0003DMT400022039,PGSC0003DMT400022987,PGSC0003DMT400028711,PGSC0003DMT400029402,PGSC0003DMT400065850	BP	0.01843	0.0287607	6	44
GO:0042440	pigment metabolic process	PGSC0003DMT400002866,PGSC0003DMT400008034,PGSC0003DMT400009287,PGSC0003DMT400016512,PGSC0003DMT400022039,PGSC0003DMT400040485,PGSC0003DMT400061846,PGSC0003DMT400062562,PGSC0003DMT400071048,PGSC0003DMT400074346	BP	0.01859	0.0283742	10	97
GO:1901360	organic cyclic compound metabolic process	PGSC0003DMT400000447,PGSC0003DMT400001746,PGSC0003DMT400001821,PGSC0003DMT400002558,PGSC0003DMT400002866,PGSC0003DMT400003796,PGSC0003DMT400008034,PGSC0003DMT400008103,PGSC0003DMT400008586,PGSC0003DMT400009471,PGSC0003DMT400010866,PGSC0003DMT400010908,PGSC0003DMT400011022,PGSC0003DMT400012169,PGSC0003DMT400012431,PGSC0003DMT400013036,PGSC0003DMT400015074,PGSC0003DMT400015282,PGSC0003DMT400015483,…	BP	0.01898	0.0287176	79	1308
GO:0016765	transferase activity, transferring alkyl or aryl (other than methyl) groups	PGSC0003DMT400005532,PGSC0003DMT400005546,PGSC0003DMT400005547,PGSC0003DMT400005558,PGSC0003DMT400005571,PGSC0003DMT400014493,PGSC0003DMT400016646,PGSC0003DMT400028619,PGSC0003DMT400038054,PGSC0003DMT400040485,PGSC0003DMT400043105,PGSC0003DMT400061846	MF	0.01944	0.0215229	12	117
GO:0046283	anthocyanin-containing compound metabolic process	PGSC0003DMT400009287,PGSC0003DMT400016512,PGSC0003DMT400022039,PGSC0003DMT400062562	BP	0.0198	0.0297	4	22
GO:0010035	response to inorganic substance	PGSC0003DMT400000192,PGSC0003DMT400000985,PGSC0003DMT400003796,PGSC0003DMT400008264,PGSC0003DMT400011627,PGSC0003DMT400015828,PGSC0003DMT400023459,PGSC0003DMT400036349,PGSC0003DMT400044362,PGSC0003DMT400047537,PGSC0003DMT400054443,PGSC0003DMT400063510,PGSC0003DMT400067858,PGSC0003DMT400071048	BP	0.01982	0.0294759	14	157
GO:0046148	pigment biosynthetic process	PGSC0003DMT400002866,PGSC0003DMT400008034,PGSC0003DMT400009287,PGSC0003DMT400016512,PGSC0003DMT400040485,PGSC0003DMT400061846,PGSC0003DMT400062562,PGSC0003DMT400071048,PGSC0003DMT400074346	BP	0.01985	0.0292703	9	84
GO:0006396	RNA processing	PGSC0003DMT400001746,PGSC0003DMT400001821,PGSC0003DMT400010908,PGSC0003DMT400012169,PGSC0003DMT400012431,PGSC0003DMT400013036,PGSC0003DMT400015074,PGSC0003DMT400018531,PGSC0003DMT400020621,PGSC0003DMT400029379,PGSC0003DMT400033081,PGSC0003DMT400039303,PGSC0003DMT400042233,PGSC0003DMT400044280,PGSC0003DMT400045694,PGSC0003DMT400046377,PGSC0003DMT400046635,PGSC0003DMT400049607,PGSC0003DMT400054608,…	BP	0.01991	0.0291121	26	351
GO:0010310	regulation of hydrogen peroxide metabolic process	PGSC0003DMT400011236,PGSC0003DMT400022039	BP	0.02121	0.0305003	2	5
GO:0048825	cotyledon development	PGSC0003DMT400044163,PGSC0003DMT400051944	BP	0.02121	0.0305003	2	5
GO:0071484	cellular response to light intensity	PGSC0003DMT400042742,PGSC0003DMT400066554	BP	0.02121	0.0305003	2	5
GO:0046483	heterocycle metabolic process	PGSC0003DMT400000447,PGSC0003DMT400001746,PGSC0003DMT400001821,PGSC0003DMT400002558,PGSC0003DMT400002866,PGSC0003DMT400003796,PGSC0003DMT400008034,PGSC0003DMT400008103,PGSC0003DMT400009551,PGSC0003DMT400010908,PGSC0003DMT400011022,PGSC0003DMT400012169,PGSC0003DMT400012431,PGSC0003DMT400013036,PGSC0003DMT400015074,PGSC0003DMT400015282,PGSC0003DMT400015483,PGSC0003DMT400018531,PGSC0003DMT400020621,…	BP	0.02126	0.0300751	71	1164
GO:0051171	regulation of nitrogen compound metabolic process	PGSC0003DMT400003796,PGSC0003DMT400011562,PGSC0003DMT400011661,PGSC0003DMT400018531,PGSC0003DMT400023432,PGSC0003DMT400023459,PGSC0003DMT400026257,PGSC0003DMT400034911,PGSC0003DMT400037716,PGSC0003DMT400044186,PGSC0003DMT400047079,PGSC0003DMT400049575,PGSC0003DMT400053433,PGSC0003DMT400054608,PGSC0003DMT400058471,PGSC0003DMT400060836,PGSC0003DMT400064306,PGSC0003DMT400067321,PGSC0003DMT400069733,…	BP	0.02184	0.0306465	22	287
GO:0010154	fruit development	PGSC0003DMT400000553,PGSC0003DMT400008264,PGSC0003DMT400011022,PGSC0003DMT400011627,PGSC0003DMT400032096,PGSC0003DMT400036765,PGSC0003DMT400044163,PGSC0003DMT400044239,PGSC0003DMT400047537,PGSC0003DMT400051944,PGSC0003DMT400059978,PGSC0003DMT400071048,PGSC0003DMT400078745	BP	0.02214	0.0308189	13	144
GO:0009806	lignan metabolic process	PGSC0003DMT400009471,PGSC0003DMT400021622,PGSC0003DMT400081785	BP	0.02242	0.0308386	3	13
GO:0009807	lignan biosynthetic process	PGSC0003DMT400009471,PGSC0003DMT400021622,PGSC0003DMT400081785	BP	0.02242	0.0308386	3	13
GO:0009991	response to extracellular stimulus	PGSC0003DMT400004695,PGSC0003DMT400015828,PGSC0003DMT400018643,PGSC0003DMT400054443,PGSC0003DMT400060223,PGSC0003DMT400064277,PGSC0003DMT400067858	BP	0.02305	0.0313336	7	59
GO:0030658	transport vesicle membrane	PGSC0003DMT400028073,PGSC0003DMT400057748	CC	0.02387	0.0294865	2	5
GO:0016780	phosphotransferase activity, for other substituted phosphate groups	PGSC0003DMT400038482,PGSC0003DMT400078517	MF	0.02468	0.0255027	2	5
GO:0017169	CDP-alcohol phosphatidyltransferase activity	PGSC0003DMT400038482,PGSC0003DMT400078517	MF	0.02468	0.0255027	2	5
GO:0050275	scopoletin glucosyltransferase activity	PGSC0003DMT400066570,PGSC0003DMT400066574	MF	0.02468	0.0255027	2	5
GO:0031667	response to nutrient levels	PGSC0003DMT400004695,PGSC0003DMT400018643,PGSC0003DMT400054443,PGSC0003DMT400060223,PGSC0003DMT400064277,PGSC0003DMT400067858	BP	0.02485	0.0335186	6	47
GO:2000112	regulation of cellular macromolecule biosynthetic process	PGSC0003DMT400003796,PGSC0003DMT400011661,PGSC0003DMT400023432,PGSC0003DMT400023459,PGSC0003DMT400034911,PGSC0003DMT400037716,PGSC0003DMT400044186,PGSC0003DMT400047079,PGSC0003DMT400049575,PGSC0003DMT400053433,PGSC0003DMT400058471,PGSC0003DMT400060836,PGSC0003DMT400064306,PGSC0003DMT400067321,PGSC0003DMT400069733,PGSC0003DMT400069921,PGSC0003DMT400076704,PGSC0003DMT400097756	BP	0.02679	0.0358574	18	227
GO:0006281	DNA repair	PGSC0003DMT400032941,PGSC0003DMT400043928,PGSC0003DMT400044280,PGSC0003DMT400046614,PGSC0003DMT400054608,PGSC0003DMT400056773,PGSC0003DMT400057987,PGSC0003DMT400064351,PGSC0003DMT400078745,PGSC0003DMT400080844	BP	0.02706	0.0359423	10	103
GO:0022622	root system development	PGSC0003DMT400014493,PGSC0003DMT400018531,PGSC0003DMT400022039,PGSC0003DMT400037716,PGSC0003DMT400063955,PGSC0003DMT400076840,PGSC0003DMT400079304	BP	0.02716	0.0356667	7	61
GO:0048364	root development	PGSC0003DMT400014493,PGSC0003DMT400018531,PGSC0003DMT400022039,PGSC0003DMT400037716,PGSC0003DMT400063955,PGSC0003DMT400076840,PGSC0003DMT400079304	BP	0.02716	0.0356667	7	61
GO:0006188	IMP biosynthetic process	PGSC0003DMT400026512,PGSC0003DMT400034522,PGSC0003DMT400059281	BP	0.02753	0.035615	3	14
GO:0046040	IMP metabolic process	PGSC0003DMT400026512,PGSC0003DMT400034522,PGSC0003DMT400059281	BP	0.02753	0.035615	3	14
GO:1901564	organonitrogen compound metabolic process	PGSC0003DMT400000192,PGSC0003DMT400000336,PGSC0003DMT400000447,PGSC0003DMT400000764,PGSC0003DMT400000946,PGSC0003DMT400002312,PGSC0003DMT400002558,PGSC0003DMT400002866,PGSC0003DMT400005512,PGSC0003DMT400007325,PGSC0003DMT400008034,PGSC0003DMT400008103,PGSC0003DMT400008560,PGSC0003DMT400009551,PGSC0003DMT400010881,PGSC0003DMT400010985,PGSC0003DMT400011562,PGSC0003DMT400011661,PGSC0003DMT400014351,…	BP	0.02919	0.037346	103	1796
GO:0010218	response to far red light	PGSC0003DMT400022039,PGSC0003DMT400044562	BP	0.03081	0.0388474	2	6
GO:0045926	negative regulation of growth	PGSC0003DMT400060463,PGSC0003DMT400076840	BP	0.03081	0.0388474	2	6
GO:0055083	monovalent inorganic anion homeostasis	PGSC0003DMT400008264,PGSC0003DMT400037716	BP	0.03081	0.0388474	2	6
GO:0010017	red or far-red light signaling pathway	PGSC0003DMT400036075,PGSC0003DMT400047079,PGSC0003DMT400058735,PGSC0003DMT400066807,PGSC0003DMT400067540	BP	0.03158	0.0389711	5	37
GO:0071489	cellular response to red or far red light	PGSC0003DMT400036075,PGSC0003DMT400047079,PGSC0003DMT400058735,PGSC0003DMT400066807,PGSC0003DMT400067540	BP	0.03158	0.0389711	5	37
GO:0090351	seedling development	PGSC0003DMT400000365,PGSC0003DMT400003228,PGSC0003DMT400011627,PGSC0003DMT400070362,PGSC0003DMT400078745	BP	0.03158	0.0389711	5	37
GO:0031323	regulation of cellular metabolic process	PGSC0003DMT400003796,PGSC0003DMT400011236,PGSC0003DMT400011562,PGSC0003DMT400011661,PGSC0003DMT400018531,PGSC0003DMT400022039,PGSC0003DMT400023432,PGSC0003DMT400023459,PGSC0003DMT400026257,PGSC0003DMT400034911,PGSC0003DMT400037716,PGSC0003DMT400044186,PGSC0003DMT400047079,PGSC0003DMT400049575,PGSC0003DMT400053433,PGSC0003DMT400054608,PGSC0003DMT400058471,PGSC0003DMT400060836,PGSC0003DMT400064306,…	BP	0.03177	0.0386572	24	332
GO:0099402	plant organ development	PGSC0003DMT400014493,PGSC0003DMT400018531,PGSC0003DMT400018728,PGSC0003DMT400022039,PGSC0003DMT400023971,PGSC0003DMT400037716,PGSC0003DMT400039303,PGSC0003DMT400044163,PGSC0003DMT400051944,PGSC0003DMT400063955,PGSC0003DMT400071048,PGSC0003DMT400076840,PGSC0003DMT400079304	BP	0.03265	0.0394521	13	152
GO:0009723	response to ethylene	PGSC0003DMT400002375,PGSC0003DMT400007511,PGSC0003DMT400010296,PGSC0003DMT400010297,PGSC0003DMT400012547,PGSC0003DMT400021312,PGSC0003DMT400024508,PGSC0003DMT400035731,PGSC0003DMT400060160,PGSC0003DMT400067472,PGSC0003DMT400068726,PGSC0003DMT400068727,PGSC0003DMT400068959,PGSC0003DMT400076840,PGSC0003DMT400076977,PGSC0003DMT400086995,PGSC0003DMT400090475	BP	0.03279	0.039348	17	216
GO:0010494	cytoplasmic stress granule	PGSC0003DMT400018728,PGSC0003DMT400020621	CC	0.0346	0.0392757	2	6
GO:0030666	endocytic vesicle membrane	PGSC0003DMT400000446,PGSC0003DMT400072563	CC	0.0346	0.0392757	2	6
GO:0043659	symbiosome	PGSC0003DMT400000446,PGSC0003DMT400072563	CC	0.0346	0.0392757	2	6
GO:0043660	bacteroid-containing symbiosome	PGSC0003DMT400000446,PGSC0003DMT400072563	CC	0.0346	0.0392757	2	6
GO:0043661	peribacteroid membrane	PGSC0003DMT400000446,PGSC0003DMT400072563	CC	0.0346	0.0392757	2	6
GO:0016108	tetraterpenoid metabolic process	PGSC0003DMT400040485,PGSC0003DMT400061846,PGSC0003DMT400071048,PGSC0003DMT400074346	BP	0.03479	0.0404914	4	26
GO:0016109	tetraterpenoid biosynthetic process	PGSC0003DMT400040485,PGSC0003DMT400061846,PGSC0003DMT400071048,PGSC0003DMT400074346	BP	0.03479	0.0404914	4	26
GO:0016116	carotenoid metabolic process	PGSC0003DMT400040485,PGSC0003DMT400061846,PGSC0003DMT400071048,PGSC0003DMT400074346	BP	0.03479	0.0404914	4	26
GO:0016117	carotenoid biosynthetic process	PGSC0003DMT400040485,PGSC0003DMT400061846,PGSC0003DMT400071048,PGSC0003DMT400074346	BP	0.03479	0.0404914	4	26
GO:0019253	reductive pentose-phosphate cycle	PGSC0003DMT400018798,PGSC0003DMT400023336,PGSC0003DMT400025712,PGSC0003DMT400062138	BP	0.03479	0.0404914	4	26
GO:0019685	photosynthesis, dark reaction	PGSC0003DMT400018798,PGSC0003DMT400023336,PGSC0003DMT400025712,PGSC0003DMT400062138	BP	0.03479	0.0404914	4	26
GO:0034284	response to monosaccharide	PGSC0003DMT400004695,PGSC0003DMT400011661,PGSC0003DMT400036899,PGSC0003DMT400067858	BP	0.03479	0.0404914	4	26
GO:0010556	regulation of macromolecule biosynthetic process	PGSC0003DMT400003796,PGSC0003DMT400011661,PGSC0003DMT400023432,PGSC0003DMT400023459,PGSC0003DMT400034911,PGSC0003DMT400037716,PGSC0003DMT400044186,PGSC0003DMT400047079,PGSC0003DMT400049575,PGSC0003DMT400053433,PGSC0003DMT400058471,PGSC0003DMT400060836,PGSC0003DMT400064306,PGSC0003DMT400067321,PGSC0003DMT400069733,PGSC0003DMT400069921,PGSC0003DMT400076704,PGSC0003DMT400097756	BP	0.03479	0.0404914	18	234
GO:0009744	response to sucrose	PGSC0003DMT400004695,PGSC0003DMT400011661,PGSC0003DMT400023336,PGSC0003DMT400053433,PGSC0003DMT400067858	BP	0.03498	0.039395	5	38
GO:0034285	response to disaccharide	PGSC0003DMT400004695,PGSC0003DMT400011661,PGSC0003DMT400023336,PGSC0003DMT400053433,PGSC0003DMT400067858	BP	0.03498	0.039395	5	38
GO:0006974	cellular response to DNA damage stimulus	PGSC0003DMT400032941,PGSC0003DMT400043928,PGSC0003DMT400044280,PGSC0003DMT400046614,PGSC0003DMT400054608,PGSC0003DMT400056773,PGSC0003DMT400057987,PGSC0003DMT400064351,PGSC0003DMT400078745,PGSC0003DMT400080844	BP	0.03597	0.0401204	10	108
GO:0009812	flavonoid metabolic process	PGSC0003DMT400009175,PGSC0003DMT400009287,PGSC0003DMT400016512,PGSC0003DMT400022039,PGSC0003DMT400026355,PGSC0003DMT400062562,PGSC0003DMT400076178	BP	0.03683	0.040818	7	65
GO:0051252	regulation of RNA metabolic process	PGSC0003DMT400003796,PGSC0003DMT400018531,PGSC0003DMT400023432,PGSC0003DMT400023459,PGSC0003DMT400037716,PGSC0003DMT400047079,PGSC0003DMT400053433,PGSC0003DMT400054608,PGSC0003DMT400058471,PGSC0003DMT400064306,PGSC0003DMT400067321,PGSC0003DMT400069733,PGSC0003DMT400069921,PGSC0003DMT400097756	BP	0.0376	0.0414076	14	171
GO:0031326	regulation of cellular biosynthetic process	PGSC0003DMT400003796,PGSC0003DMT400011661,PGSC0003DMT400023432,PGSC0003DMT400023459,PGSC0003DMT400034911,PGSC0003DMT400037716,PGSC0003DMT400044186,PGSC0003DMT400047079,PGSC0003DMT400049575,PGSC0003DMT400053433,PGSC0003DMT400058471,PGSC0003DMT400060836,PGSC0003DMT400064306,PGSC0003DMT400067321,PGSC0003DMT400069733,PGSC0003DMT400069921,PGSC0003DMT400076704,PGSC0003DMT400097756	BP	0.03871	0.0423619	18	237
GO:0001510	RNA methylation	PGSC0003DMT400011022,PGSC0003DMT400059978	BP	0.04177	0.045003	2	7
GO:0007584	response to nutrient	PGSC0003DMT400054443,PGSC0003DMT400067858	BP	0.04177	0.045003	2	7
GO:0043484	regulation of RNA splicing	PGSC0003DMT400018531,PGSC0003DMT400054608	BP	0.04177	0.045003	2	7
GO:0046246	terpene biosynthetic process	PGSC0003DMT400008586,PGSC0003DMT400071048	BP	0.04177	0.045003	2	7
GO:0006979	response to oxidative stress	PGSC0003DMT400008264,PGSC0003DMT400018728,PGSC0003DMT400054443,PGSC0003DMT400060463,PGSC0003DMT400063510,PGSC0003DMT400078745	BP	0.0418	0.0443488	6	53
GO:0033554	cellular response to stress	PGSC0003DMT400015828,PGSC0003DMT400018643,PGSC0003DMT400018798,PGSC0003DMT400020621,PGSC0003DMT400023336,PGSC0003DMT400025712,PGSC0003DMT400032941,PGSC0003DMT400043928,PGSC0003DMT400044280,PGSC0003DMT400046614,PGSC0003DMT400047418,PGSC0003DMT400051809,PGSC0003DMT400054608,PGSC0003DMT400056773,PGSC0003DMT400057987,PGSC0003DMT400060223,PGSC0003DMT400064351,PGSC0003DMT400078673,PGSC0003DMT400078745,…	BP	0.04339	0.0457567	20	274
GO:0009605	response to external stimulus	PGSC0003DMT400004695,PGSC0003DMT400005086,PGSC0003DMT400011236,PGSC0003DMT400015828,PGSC0003DMT400018643,PGSC0003DMT400022039,PGSC0003DMT400022474,PGSC0003DMT400023459,PGSC0003DMT400024632,PGSC0003DMT400027119,PGSC0003DMT400036075,PGSC0003DMT400037472,PGSC0003DMT400054443,PGSC0003DMT400058735,PGSC0003DMT400060223,PGSC0003DMT400064277,PGSC0003DMT400064504,PGSC0003DMT400066807,PGSC0003DMT400067540,…	BP	0.04426	0.046393	23	326
GO:0009743	response to carbohydrate	PGSC0003DMT400004695,PGSC0003DMT400011661,PGSC0003DMT400023336,PGSC0003DMT400036899,PGSC0003DMT400053433,PGSC0003DMT400067858	BP	0.04519	0.0470842	6	54
GO:0044428	nuclear part	PGSC0003DMT400000859,PGSC0003DMT400001746,PGSC0003DMT400006590,PGSC0003DMT400006927,PGSC0003DMT400010908,PGSC0003DMT400012169,PGSC0003DMT400018531,PGSC0003DMT400022039,PGSC0003DMT400025891,PGSC0003DMT400033081,PGSC0003DMT400039303,PGSC0003DMT400044280,PGSC0003DMT400045694,PGSC0003DMT400046635,PGSC0003DMT400049444,PGSC0003DMT400051944,PGSC0003DMT400052941,PGSC0003DMT400055636,PGSC0003DMT400058471,…	CC	0.04606	0.048363	29	406
GO:0009411	response to UV	PGSC0003DMT400042742,PGSC0003DMT400066554,PGSC0003DMT400078745	BP	0.04623	0.0474573	3	17
GO:0009718	anthocyanin-containing compound biosynthetic process	PGSC0003DMT400009287,PGSC0003DMT400016512,PGSC0003DMT400062562	BP	0.04623	0.0474573	3	17
GO:0019344	cysteine biosynthetic process	PGSC0003DMT400000764,PGSC0003DMT400016646,PGSC0003DMT400057095	BP	0.04623	0.0474573	3	17
GO:0070417	cellular response to cold	PGSC0003DMT400018798,PGSC0003DMT400023336,PGSC0003DMT400025712	BP	0.04623	0.0474573	3	17
GO:0080134	regulation of response to stress	PGSC0003DMT400000985,PGSC0003DMT400003796,PGSC0003DMT400008264,PGSC0003DMT400011627,PGSC0003DMT400022039,PGSC0003DMT400023459,PGSC0003DMT400037472,PGSC0003DMT400064306,PGSC0003DMT400069921,PGSC0003DMT400097756	BP	0.04674	0.0472835	10	113
GO:0010598	NAD(P)H dehydrogenase complex (plastoquinone)	PGSC0003DMT400071157,PGSC0003DMT400095387	CC	0.04681	0.047374	2	7
GO:0033588	Elongator holoenzyme complex	PGSC0003DMT400039303,PGSC0003DMT400067888	CC	0.04681	0.047374	2	7
GO:0080090	regulation of primary metabolic process	PGSC0003DMT400003796,PGSC0003DMT400011562,PGSC0003DMT400011661,PGSC0003DMT400018531,PGSC0003DMT400023432,PGSC0003DMT400023459,PGSC0003DMT400026257,PGSC0003DMT400034911,PGSC0003DMT400037716,PGSC0003DMT400044186,PGSC0003DMT400047079,PGSC0003DMT400049575,PGSC0003DMT400053433,PGSC0003DMT400054608,PGSC0003DMT400058471,PGSC0003DMT400060836,PGSC0003DMT400064306,PGSC0003DMT400067321,PGSC0003DMT400069733,…	BP	0.04863	0.0489111	22	312
GO:0009845	seed germination	PGSC0003DMT400003228,PGSC0003DMT400011627,PGSC0003DMT400070362,PGSC0003DMT400078745	BP	0.04938	0.04938	4	29
