# Supplementary material for: Genome-Wide Identification and Characterization of Potato Long Non-coding RNAs Associated With Phytophthora infestans Resistance
Source: Front Plant Sci. 2021 Feb 10;12:619062. doi: 10.3389/fpls.2021.619062 (PMC7902931; doi:10.3389/fpls.2021.619062)
Supplement: Supplementary Table 13 — Constructing GRN using lncRNAs and other mRNAs by performing GENIE3. [file Table_13.XLSX]

## Sheet: S13_new
LncRNA	TargetGene	connectivity
StLNC0001	MSTRG.242.2	0.441268
StLNC0001	MSTRG.25428.8	0.440355
StLNC0001	PGSC0003DMT400061423	0.438479
StLNC0001	MSTRG.479.2	0.437053
StLNC0001	MSTRG.28824.4	0.436743
StLNC0001	MSTRG.22257.5	0.436733
StLNC0001	PGSC0003DMT400041792	0.436714
StLNC0001	PGSC0003DMT400075878	0.435089
StLNC0001	MSTRG.2889.9	0.431655
StLNC0001	PGSC0003DMT400004068	0.430102
StLNC0001	PGSC0003DMT400003538	0.426802
StLNC0001	PGSC0003DMT400079485	0.425709
StLNC0001	MSTRG.13132.5	0.42565
StLNC0001	MSTRG.28420.1	0.424609
StLNC0001	MSTRG.22382.14	0.424211
StLNC0001	MSTRG.24041.2	0.424021
StLNC0001	PGSC0003DMT400056182	0.423308
StLNC0001	PGSC0003DMT400074198	0.423056
StLNC0001	MSTRG.29017.3	0.422998
StLNC0001	PGSC0003DMT400035166	0.422361
StLNC0001	MSTRG.5324.4	0.42059
StLNC0001	MSTRG.20339.2	0.420533
StLNC0001	MSTRG.302.5	0.420338
StLNC0001	MSTRG.13991.2	0.419393
StLNC0001	PGSC0003DMT400011175	0.417615
StLNC0001	PGSC0003DMT400069988	0.416627
StLNC0001	PGSC0003DMT400044826	0.416088
StLNC0001	MSTRG.4193.3	0.416071
StLNC0001	PGSC0003DMT400058619	0.416048
StLNC0001	MSTRG.80.31	0.415027
StLNC0001	MSTRG.19253.4	0.414882
StLNC0001	MSTRG.9538.3	0.413324
StLNC0001	PGSC0003DMT400048819	0.41324
StLNC0001	MSTRG.11254.36	0.411016
StLNC0001	MSTRG.14322.2	0.410462
StLNC0001	MSTRG.1448.2	0.409895
StLNC0001	MSTRG.23998.3	0.409852
StLNC0001	MSTRG.23752.6	0.409724
StLNC0001	MSTRG.9387.11	0.409387
StLNC0001	MSTRG.7778.3	0.409338
StLNC0001	MSTRG.13132.6	0.408904
StLNC0001	MSTRG.27072.8	0.408864
StLNC0001	MSTRG.11254.34	0.408782
StLNC0001	MSTRG.25466.2	0.40861
StLNC0001	MSTRG.19488.2	0.408559
StLNC0001	MSTRG.11485.1	0.408355
StLNC0001	MSTRG.12459.2	0.407985
StLNC0001	MSTRG.19151.2	0.407846
StLNC0001	MSTRG.6713.3	0.407761
StLNC0001	MSTRG.3989.3	0.406769
StLNC0001	MSTRG.900.10	0.40641
StLNC0001	MSTRG.90.4	0.405617
StLNC0001	MSTRG.29342.3	0.405471
StLNC0001	MSTRG.23144.1	0.405301
StLNC0001	MSTRG.7725.4	0.405246
StLNC0001	MSTRG.20840.2	0.405241
StLNC0001	MSTRG.7908.2	0.405123
StLNC0001	PGSC0003DMT400020949	0.404485
StLNC0001	MSTRG.9050.3	0.404027
StLNC0001	MSTRG.15128.1	0.403449
StLNC0001	MSTRG.11448.3	0.403379
StLNC0001	MSTRG.7194.2	0.403243
StLNC0001	MSTRG.22582.3	0.403229
StLNC0001	PGSC0003DMT400056672	0.403225
StLNC0001	MSTRG.8975.2	0.403191
StLNC0001	MSTRG.2534.2	0.403174
StLNC0001	MSTRG.23064.2	0.402886
StLNC0001	MSTRG.15735.3	0.402783
StLNC0001	MSTRG.17025.2	0.402666
StLNC0001	PGSC0003DMT400046976	0.402541
StLNC0001	MSTRG.16675.2	0.402271
StLNC0001	MSTRG.11813.3	0.402265
StLNC0001	MSTRG.3777.2	0.402194
StLNC0001	MSTRG.22745.2	0.40219
StLNC0001	MSTRG.22373.1	0.402163
StLNC0001	PGSC0003DMT400038925	0.402058
StLNC0001	PGSC0003DMT400015286	0.401838
StLNC0001	MSTRG.24002.2	0.401776
StLNC0001	MSTRG.1312.3	0.401725
StLNC0001	MSTRG.26315.2	0.401617
StLNC0001	MSTRG.1151.5	0.401446
StLNC0001	PGSC0003DMT400035810	0.40129
StLNC0001	MSTRG.12635.1	0.401198
StLNC0001	MSTRG.19563.4	0.400979
StLNC0001	PGSC0003DMT400072317	0.400777
StLNC0001	MSTRG.26132.3	0.400579
StLNC0001	MSTRG.21804.2	0.400252
StLNC0001	MSTRG.9911.2	0.400201
StLNC0001	MSTRG.8149.8	0.399361
StLNC0001	MSTRG.11205.6	0.399269
StLNC0001	MSTRG.28450.1	0.399186
StLNC0001	MSTRG.16852.3	0.39891
StLNC0001	MSTRG.6613.2	0.398799
StLNC0001	PGSC0003DMT400055732	0.398723
StLNC0001	MSTRG.23962.3	0.3987
StLNC0001	MSTRG.14804.2	0.398694
StLNC0001	MSTRG.29317.171	0.398684
StLNC0001	PGSC0003DMT400081965	0.398666
StLNC0001	MSTRG.15907.2	0.398112
StLNC0001	MSTRG.25416.2	0.397478
StLNC0001	PGSC0003DMT400070486	0.397433
StLNC0001	MSTRG.24472.1	0.397403
StLNC0001	PGSC0003DMT400025010	0.397308
StLNC0001	MSTRG.26182.2	0.39712
StLNC0001	MSTRG.14824.3	0.397076
StLNC0001	PGSC0003DMT400051085	0.397032
StLNC0001	MSTRG.11252.3	0.396786
StLNC0001	MSTRG.3124.3	0.396631
StLNC0001	PGSC0003DMT400032930	0.396606
StLNC0001	MSTRG.6109.2	0.396483
StLNC0001	MSTRG.7417.11	0.396427
StLNC0001	MSTRG.5267.2	0.396105
StLNC0001	MSTRG.1243.47	0.395946
StLNC0001	MSTRG.24643.4	0.395585
StLNC0001	MSTRG.8313.1	0.395494
StLNC0001	MSTRG.5022.4	0.395484
StLNC0001	MSTRG.13387.3	0.39535
StLNC0001	PGSC0003DMT400024831	0.395199
StLNC0001	MSTRG.15021.2	0.395195
StLNC0001	MSTRG.17084.3	0.395187
StLNC0001	MSTRG.12926.10	0.394878
StLNC0001	MSTRG.16113.11	0.394726
StLNC0001	MSTRG.20411.2	0.394399
StLNC0001	MSTRG.9764.3	0.394392
StLNC0001	MSTRG.6276.3	0.394217
StLNC0001	MSTRG.14513.1	0.394197
StLNC0001	MSTRG.15833.3	0.394037
StLNC0001	MSTRG.4065.6	0.394008
StLNC0001	MSTRG.2325.7	0.393888
StLNC0001	MSTRG.3219.3	0.393846
StLNC0001	MSTRG.26300.4	0.393745
StLNC0001	MSTRG.16273.1	0.393719
StLNC0001	MSTRG.11865.4	0.393448
StLNC0001	MSTRG.27019.11	0.393429
StLNC0001	MSTRG.26135.4	0.393426
StLNC0001	MSTRG.22340.2	0.39337
StLNC0001	MSTRG.18288.2	0.393169
StLNC0001	MSTRG.18442.4	0.392919
StLNC0001	MSTRG.19725.2	0.392795
StLNC0001	MSTRG.243.2	0.392448
StLNC0001	PGSC0003DMT400016625	0.392299
StLNC0001	MSTRG.11111.5	0.392202
StLNC0001	MSTRG.23520.4	0.39215
StLNC0001	MSTRG.27563.2	0.391743
StLNC0001	MSTRG.13693.1	0.391701
StLNC0001	MSTRG.12884.11	0.391566
StLNC0001	MSTRG.12147.17	0.391496
StLNC0001	PGSC0003DMT400035989	0.391465
StLNC0001	MSTRG.8309.4	0.391385
StLNC0001	MSTRG.191.5	0.391371
StLNC0001	MSTRG.28359.6	0.391197
StLNC0001	PGSC0003DMT400080637	0.391159
StLNC0001	PGSC0003DMT400021880	0.391008
StLNC0001	MSTRG.14164.2	0.390976
StLNC0001	MSTRG.3989.6	0.390794
StLNC0001	PGSC0003DMT400044457	0.390756
StLNC0001	MSTRG.25554.1	0.390562
StLNC0001	MSTRG.24300.2	0.390319
StLNC0001	MSTRG.17261.2	0.390263
StLNC0001	PGSC0003DMT400049877	0.390191
StLNC0001	MSTRG.19589.6	0.390164
StLNC0001	MSTRG.7214.10	0.39011
StLNC0001	MSTRG.27277.1	0.389795
StLNC0001	PGSC0003DMT400068951	0.389747
StLNC0001	MSTRG.2301.8	0.389495
StLNC0001	MSTRG.18150.2	0.389494
StLNC0001	MSTRG.2965.4	0.389477
StLNC0001	MSTRG.29044.2	0.389424
StLNC0001	PGSC0003DMT400031035	0.389318
StLNC0001	PGSC0003DMT400086734	0.389127
StLNC0001	MSTRG.11676.1	0.389075
StLNC0001	PGSC0003DMT400058240	0.38896
StLNC0001	PGSC0003DMT400043893	0.388833
StLNC0001	PGSC0003DMT400014025	0.388807
StLNC0001	MSTRG.22249.1	0.388741
StLNC0001	PGSC0003DMT400063984	0.388545
StLNC0001	MSTRG.18406.2	0.388452
StLNC0001	MSTRG.25631.7	0.388356
StLNC0001	MSTRG.5573.4	0.388323
StLNC0001	MSTRG.25181.8	0.388156
StLNC0001	MSTRG.27465.2	0.387861
StLNC0001	MSTRG.8952.5	0.387859
StLNC0001	MSTRG.3588.4	0.387759
StLNC0001	PGSC0003DMT400002095	0.387616
StLNC0001	PGSC0003DMT400025267	0.387518
StLNC0001	PGSC0003DMT400014477	0.387489
StLNC0001	MSTRG.3121.2	0.387461
StLNC0001	MSTRG.1549.3	0.387304
StLNC0001	MSTRG.3347.3	0.387284
StLNC0001	MSTRG.2325.3	0.38707
StLNC0001	MSTRG.15525.2	0.387028
StLNC0001	MSTRG.1946.3	0.386935
StLNC0001	MSTRG.5760.7	0.386866
StLNC0001	MSTRG.23485.2	0.386758
StLNC0001	MSTRG.25695.2	0.386725
StLNC0001	MSTRG.7866.2	0.386401
StLNC0001	MSTRG.1727.2	0.386343
StLNC0001	PGSC0003DMT400048658	0.386278
StLNC0001	MSTRG.20530.5	0.386139
StLNC0001	MSTRG.18138.7	0.3861
StLNC0001	PGSC0003DMT400067478	0.385974
StLNC0001	MSTRG.25700.4	0.385754
StLNC0001	MSTRG.19090.2	0.385707
StLNC0001	MSTRG.9190.6	0.385686
StLNC0001	MSTRG.28320.3	0.385371
StLNC0001	PGSC0003DMT400022021	0.385177
StLNC0001	MSTRG.3102.3	0.385152
StLNC0001	PGSC0003DMT400085603	0.385101
StLNC0001	MSTRG.2889.8	0.385007
StLNC0001	MSTRG.19269.5	0.385004
StLNC0001	MSTRG.3483.22	0.384901
StLNC0001	MSTRG.3433.2	0.384776
StLNC0001	MSTRG.13130.1	0.384698
StLNC0001	MSTRG.26417.6	0.384468
StLNC0001	MSTRG.10469.3	0.384417
StLNC0001	PGSC0003DMT400022322	0.384403
StLNC0001	PGSC0003DMT400042514	0.384021
StLNC0001	MSTRG.16892.4	0.383622
StLNC0001	MSTRG.20402.6	0.383312
StLNC0001	MSTRG.22626.3	0.383291
StLNC0001	MSTRG.21381.3	0.383236
StLNC0001	MSTRG.6469.8	0.382753
StLNC0001	MSTRG.18963.28	0.382745
StLNC0001	MSTRG.27747.1	0.382413
StLNC0001	MSTRG.10523.3	0.382281
StLNC0001	MSTRG.10691.5	0.381979
StLNC0001	MSTRG.11825.2	0.381572
StLNC0001	MSTRG.6373.2	0.380772
StLNC0001	MSTRG.17926.8	0.380698
StLNC0001	MSTRG.7688.4	0.380695
StLNC0001	PGSC0003DMT400075536	0.380368
StLNC0001	PGSC0003DMT400048531	0.380304
StLNC0001	MSTRG.28461.4	0.380053
StLNC0001	MSTRG.4261.4	0.379923
StLNC0001	MSTRG.27925.3	0.379903
StLNC0001	MSTRG.9254.7	0.379824
StLNC0001	PGSC0003DMT400059501	0.379648
StLNC0001	PGSC0003DMT400068325	0.379492
StLNC0001	PGSC0003DMT400024364	0.379465
StLNC0001	PGSC0003DMT400042043	0.379208
StLNC0001	MSTRG.14396.3	0.379176
StLNC0001	MSTRG.4742.5	0.379143
StLNC0001	MSTRG.9042.5	0.379017
StLNC0001	MSTRG.10132.4	0.378954
StLNC0001	MSTRG.22303.2	0.378528
StLNC0001	MSTRG.15295.2	0.378459
StLNC0001	MSTRG.6724.2	0.378353
StLNC0001	PGSC0003DMT400059840	0.377835
StLNC0001	MSTRG.22836.5	0.37771
StLNC0001	MSTRG.10191.1	0.37719
StLNC0001	MSTRG.18138.6	0.377114
StLNC0001	MSTRG.29162.3	0.377061
StLNC0001	MSTRG.13427.4	0.376972
StLNC0001	MSTRG.16434.4	0.376787
StLNC0001	MSTRG.8392.2	0.376781
StLNC0001	PGSC0003DMT400045027	0.376655
StLNC0001	MSTRG.8870.4	0.376523
StLNC0001	MSTRG.9469.4	0.376492
StLNC0001	MSTRG.22917.1	0.376473
StLNC0001	MSTRG.15800.2	0.376434
StLNC0001	MSTRG.27207.7	0.376314
StLNC0001	MSTRG.27351.7	0.376174
StLNC0001	MSTRG.13488.3	0.376119
StLNC0001	MSTRG.1780.2	0.376076
StLNC0001	MSTRG.10769.2	0.37592
StLNC0001	MSTRG.10694.4	0.375883
StLNC0001	MSTRG.6426.3	0.37537
StLNC0001	MSTRG.7545.2	0.37529
StLNC0001	PGSC0003DMT400028311	0.375173
StLNC0001	PGSC0003DMT400001029	0.374932
StLNC0001	MSTRG.499.2	0.374904
StLNC0001	MSTRG.15102.4	0.374887
StLNC0001	MSTRG.13365.3	0.374871
StLNC0001	MSTRG.1577.3	0.374756
StLNC0001	PGSC0003DMT400023083	0.374714
StLNC0001	MSTRG.19168.2	0.374546
StLNC0001	MSTRG.7200.7	0.37413
StLNC0001	PGSC0003DMT400017745	0.373693
StLNC0001	MSTRG.16556.2	0.373659
StLNC0001	MSTRG.27862.2	0.373482
StLNC0001	MSTRG.14323.2	0.373472
StLNC0001	MSTRG.18790.4	0.3734
StLNC0001	MSTRG.28587.7	0.373381
StLNC0001	PGSC0003DMT400055614	0.373269
StLNC0001	MSTRG.3724.2	0.373266
StLNC0001	MSTRG.1462.3	0.373252
StLNC0001	PGSC0003DMT400049650	0.373146
StLNC0001	PGSC0003DMT400060032	0.372931
StLNC0001	MSTRG.11709.2	0.372901
StLNC0001	MSTRG.21561.3	0.37273
StLNC0001	MSTRG.18138.3	0.37265
StLNC0001	MSTRG.16025.4	0.372552
StLNC0001	MSTRG.19715.2	0.372543
StLNC0001	PGSC0003DMT400059139	0.372407
StLNC0001	MSTRG.12322.2	0.372309
StLNC0001	MSTRG.14437.3	0.372144
StLNC0001	MSTRG.26502.4	0.372052
StLNC0001	MSTRG.10044.5	0.371894
StLNC0001	MSTRG.313.2	0.371887
StLNC0001	MSTRG.592.1	0.371851
StLNC0001	MSTRG.22094.4	0.371815
StLNC0001	MSTRG.25492.9	0.371737
StLNC0001	PGSC0003DMT400061742	0.37134
StLNC0001	MSTRG.19455.7	0.371179
StLNC0001	MSTRG.25492.6	0.371096
StLNC0001	MSTRG.6426.18	0.370858
StLNC0001	PGSC0003DMT400077785	0.370649
StLNC0001	MSTRG.2521.2	0.370604
StLNC0001	MSTRG.24669.1	0.370585
StLNC0001	MSTRG.16660.2	0.370508
StLNC0001	MSTRG.4165.2	0.370426
StLNC0001	MSTRG.14156.4	0.370132
StLNC0001	MSTRG.27117.2	0.369699
StLNC0001	MSTRG.1657.42	0.369352
StLNC0001	PGSC0003DMT400037562	0.369218
StLNC0001	MSTRG.28854.2	0.369041
StLNC0001	MSTRG.28313.4	0.36892
StLNC0001	MSTRG.15743.2	0.368909
StLNC0001	MSTRG.12147.6	0.3685
StLNC0001	PGSC0003DMT400021592	0.368456
StLNC0001	MSTRG.2411.2	0.368304
StLNC0001	MSTRG.27299.5	0.36825
StLNC0001	MSTRG.10098.3	0.368214
StLNC0001	MSTRG.17523.2	0.368072
StLNC0001	MSTRG.22014.1	0.367833
StLNC0001	MSTRG.12040.2	0.367817
StLNC0001	PGSC0003DMT400009982	0.367577
StLNC0001	MSTRG.80.7	0.367572
StLNC0001	MSTRG.3111.2	0.367457
StLNC0001	MSTRG.11426.1	0.367409
StLNC0001	MSTRG.29104.5	0.367326
StLNC0001	MSTRG.11165.9	0.36707
StLNC0001	MSTRG.15107.24	0.366874
StLNC0001	MSTRG.25085.3	0.366565
StLNC0001	MSTRG.21945.1	0.366564
StLNC0001	MSTRG.13132.8	0.366465
StLNC0001	MSTRG.6046.18	0.366441
StLNC0001	PGSC0003DMT400073086	0.366244
StLNC0001	MSTRG.27019.13	0.366164
StLNC0001	MSTRG.29394.2	0.366109
StLNC0001	MSTRG.6426.10	0.366096
StLNC0001	MSTRG.7125.6	0.365933
StLNC0001	MSTRG.2602.4	0.365599
StLNC0001	MSTRG.24696.29	0.365123
StLNC0001	MSTRG.13132.10	0.364967
StLNC0001	MSTRG.21472.6	0.364829
StLNC0001	MSTRG.29317.186	0.364785
StLNC0001	MSTRG.6426.13	0.364622
StLNC0001	MSTRG.18620.5	0.36457
StLNC0001	MSTRG.3359.6	0.364481
StLNC0001	MSTRG.9460.2	0.364448
StLNC0001	MSTRG.14941.3	0.364277
StLNC0001	MSTRG.19460.3	0.36412
StLNC0001	MSTRG.4591.4	0.364089
StLNC0001	MSTRG.15656.3	0.363938
StLNC0001	MSTRG.8218.1	0.363919
StLNC0001	MSTRG.20159.2	0.363899
StLNC0001	MSTRG.1022.2	0.363766
StLNC0001	MSTRG.16912.1	0.363674
StLNC0001	MSTRG.25631.12	0.36364
StLNC0001	MSTRG.5975.6	0.363613
StLNC0001	MSTRG.9395.2	0.363427
StLNC0001	MSTRG.5670.2	0.363296
StLNC0001	MSTRG.19211.10	0.363285
StLNC0001	MSTRG.18714.4	0.363227
StLNC0001	MSTRG.28634.3	0.363071
StLNC0001	MSTRG.8760.4	0.362882
StLNC0001	MSTRG.18837.2	0.362703
StLNC0001	MSTRG.22976.18	0.362648
StLNC0001	MSTRG.27367.4	0.362524
StLNC0001	MSTRG.416.2	0.362504
StLNC0001	MSTRG.23210.1	0.3625
StLNC0001	MSTRG.23597.1	0.362497
StLNC0001	PGSC0003DMT400064804	0.362457
StLNC0001	MSTRG.17658.2	0.362416
StLNC0001	MSTRG.2811.1	0.362372
StLNC0001	MSTRG.7212.9	0.362278
StLNC0001	MSTRG.6927.5	0.36203
StLNC0001	MSTRG.24619.2	0.361964
StLNC0001	MSTRG.14531.1	0.361879
StLNC0001	MSTRG.16139.1	0.36138
StLNC0001	MSTRG.17279.12	0.361255
StLNC0001	MSTRG.3894.3	0.361055
StLNC0001	PGSC0003DMT400074224	0.360828
StLNC0001	MSTRG.10573.3	0.360803
StLNC0001	MSTRG.20625.13	0.360703
StLNC0001	MSTRG.8559.2	0.360678
StLNC0001	PGSC0003DMT400035217	0.360678
StLNC0001	MSTRG.7510.2	0.360645
StLNC0001	MSTRG.14765.4	0.360431
StLNC0001	MSTRG.14615.2	0.360342
StLNC0001	MSTRG.1418.2	0.360265
StLNC0001	MSTRG.19893.2	0.35992
StLNC0001	MSTRG.3251.2	0.359637
StLNC0001	MSTRG.26000.2	0.359574
StLNC0001	MSTRG.3258.1	0.359513
StLNC0001	MSTRG.12700.3	0.359061
StLNC0001	PGSC0003DMT400023939	0.358919
StLNC0001	MSTRG.7886.7	0.358357
StLNC0001	MSTRG.13484.1	0.358306
StLNC0001	MSTRG.2534.3	0.358222
StLNC0001	MSTRG.18353.4	0.358042
StLNC0001	MSTRG.9934.1	0.357863
StLNC0001	MSTRG.16824.2	0.357616
StLNC0001	PGSC0003DMT400018159	0.357577
StLNC0001	PGSC0003DMT400005732	0.35751
StLNC0001	MSTRG.16025.2	0.357489
StLNC0001	PGSC0003DMT400059259	0.357393
StLNC0001	PGSC0003DMT400050790	0.357334
StLNC0001	MSTRG.6046.13	0.357058
StLNC0001	MSTRG.21044.1	0.356542
StLNC0001	MSTRG.8296.10	0.356513
StLNC0001	PGSC0003DMT400031132	0.356399
StLNC0001	MSTRG.292.27	0.35631
StLNC0001	MSTRG.2432.6	0.35626
StLNC0001	MSTRG.29317.40	0.356052
StLNC0001	MSTRG.22618.3	0.355998
StLNC0001	PGSC0003DMT400014452	0.355919
StLNC0001	MSTRG.1366.3	0.355853
StLNC0001	MSTRG.7894.3	0.355497
StLNC0001	PGSC0003DMT400010226	0.355415
StLNC0001	MSTRG.22582.2	0.354957
StLNC0001	PGSC0003DMT400050070	0.354903
StLNC0001	MSTRG.25407.29	0.354817
StLNC0001	MSTRG.27680.2	0.354796
StLNC0001	PGSC0003DMT400057993	0.354702
StLNC0001	MSTRG.6401.5	0.35469
StLNC0001	MSTRG.26733.4	0.354531
StLNC0001	PGSC0003DMT400042589	0.354366
StLNC0001	MSTRG.8851.3	0.3542
StLNC0001	PGSC0003DMT400058061	0.354072
StLNC0001	MSTRG.23078.2	0.353775
StLNC0001	MSTRG.12633.2	0.353764
StLNC0001	MSTRG.2638.9	0.353179
StLNC0001	MSTRG.5677.4	0.353127
StLNC0001	PGSC0003DMT400018693	0.353081
StLNC0001	MSTRG.1429.4	0.353065
StLNC0001	MSTRG.14583.1	0.352994
StLNC0001	PGSC0003DMT400047058	0.352861
StLNC0001	MSTRG.25758.2	0.352647
StLNC0001	MSTRG.16611.9	0.352435
StLNC0001	MSTRG.17301.3	0.352419
StLNC0001	PGSC0003DMT400003302	0.3524
StLNC0001	MSTRG.7212.1	0.352329
StLNC0001	PGSC0003DMT400075717	0.352316
StLNC0001	PGSC0003DMT400058779	0.352249
StLNC0001	MSTRG.15998.1	0.352128
StLNC0001	MSTRG.22955.1	0.351993
StLNC0001	MSTRG.12163.3	0.351859
StLNC0001	MSTRG.15833.4	0.351601
StLNC0001	MSTRG.14383.8	0.351457
StLNC0001	MSTRG.28360.1	0.351439
StLNC0001	MSTRG.15091.3	0.351345
StLNC0001	MSTRG.18616.2	0.351327
StLNC0001	MSTRG.16353.3	0.351321
StLNC0001	MSTRG.2155.2	0.351107
StLNC0001	MSTRG.3366.3	0.350983
StLNC0001	MSTRG.28287.1	0.350939
StLNC0001	MSTRG.10728.4	0.350731
StLNC0001	MSTRG.25931.2	0.350312
StLNC0001	MSTRG.29317.135	0.350254
StLNC0001	MSTRG.10569.2	0.350231
StLNC0001	MSTRG.28360.5	0.350186
StLNC0001	PGSC0003DMT400073669	0.349999
StLNC0001	MSTRG.1374.3	0.349814
StLNC0001	MSTRG.5070.2	0.349466
StLNC0001	MSTRG.16741.4	0.34931
StLNC0001	MSTRG.17307.4	0.348971
StLNC0001	MSTRG.11279.6	0.348723
StLNC0001	MSTRG.21374.1	0.348602
StLNC0001	MSTRG.5072.3	0.348466
StLNC0001	MSTRG.17769.1	0.348418
StLNC0001	MSTRG.27367.10	0.348256
StLNC0001	MSTRG.6696.2	0.347889
StLNC0001	PGSC0003DMT400027379	0.347754
StLNC0001	MSTRG.11813.5	0.347549
StLNC0001	MSTRG.10619.2	0.347502
StLNC0001	MSTRG.4005.3	0.347287
StLNC0001	MSTRG.9689.5	0.347179
StLNC0001	MSTRG.23245.2	0.347169
StLNC0001	PGSC0003DMT400048191	0.34711
StLNC0001	MSTRG.17508.1	0.347041
StLNC0001	PGSC0003DMT400070314	0.347013
StLNC0001	MSTRG.23913.1	0.346858
StLNC0001	PGSC0003DMT400031352	0.346836
StLNC0001	MSTRG.11256.11	0.346783
StLNC0001	MSTRG.26211.4	0.346659
StLNC0001	MSTRG.9613.3	0.346521
StLNC0001	MSTRG.23273.1	0.346287
StLNC0001	MSTRG.13880.1	0.345954
StLNC0001	MSTRG.23938.1	0.345828
StLNC0001	MSTRG.12924.2	0.345382
StLNC0001	MSTRG.11313.2	0.34537
StLNC0001	PGSC0003DMT400002961	0.34491
StLNC0001	MSTRG.14570.4	0.344798
StLNC0001	MSTRG.16366.2	0.344671
StLNC0001	MSTRG.21887.2	0.344576
StLNC0001	MSTRG.9387.1	0.344553
StLNC0001	PGSC0003DMT400016079	0.344389
StLNC0001	PGSC0003DMT400058635	0.344364
StLNC0001	PGSC0003DMT400040409	0.344363
StLNC0001	MSTRG.20484.15	0.344304
StLNC0001	MSTRG.5120.3	0.344205
StLNC0001	MSTRG.9092.1	0.343868
StLNC0001	MSTRG.19346.1	0.343865
StLNC0001	MSTRG.27792.1	0.343861
StLNC0001	MSTRG.20128.11	0.343734
StLNC0001	MSTRG.18578.2	0.343686
StLNC0001	MSTRG.18988.2	0.343548
StLNC0001	MSTRG.16544.13	0.343545
StLNC0001	MSTRG.9492.4	0.343532
StLNC0001	PGSC0003DMT400045324	0.343334
StLNC0001	MSTRG.12348.4	0.343193
StLNC0001	PGSC0003DMT400020072	0.343131
StLNC0001	MSTRG.10785.6	0.342839
StLNC0001	MSTRG.21581.8	0.342779
StLNC0001	MSTRG.6919.4	0.342416
StLNC0001	PGSC0003DMT400055776	0.342133
StLNC0001	MSTRG.7194.7	0.341962
StLNC0001	MSTRG.8079.3	0.341904
StLNC0001	MSTRG.23331.5	0.341808
StLNC0001	MSTRG.1592.2	0.341747
StLNC0001	MSTRG.18528.1	0.341719
StLNC0001	MSTRG.292.53	0.341421
StLNC0001	PGSC0003DMT400046664	0.341055
StLNC0001	MSTRG.17102.2	0.340792
StLNC0001	PGSC0003DMT400026473	0.340717
StLNC0001	PGSC0003DMT400000043	0.340443
StLNC0001	MSTRG.19271.2	0.340313
StLNC0001	MSTRG.4665.4	0.340128
StLNC0001	MSTRG.2033.5	0.340081
StLNC0001	MSTRG.16734.4	0.339988
StLNC0001	MSTRG.24053.2	0.339945
StLNC0001	PGSC0003DMT400059740	0.339769
StLNC0001	MSTRG.7723.2	0.33962
StLNC0001	MSTRG.4185.6	0.339536
StLNC0001	MSTRG.25237.1	0.339506
StLNC0001	MSTRG.2125.6	0.339336
StLNC0001	MSTRG.18750.4	0.339259
StLNC0001	MSTRG.20065.3	0.339209
StLNC0001	MSTRG.13042.4	0.339152
StLNC0001	MSTRG.6833.2	0.339078
StLNC0001	MSTRG.19072.6	0.338855
StLNC0001	MSTRG.2971.4	0.338732
StLNC0001	PGSC0003DMT400056455	0.338137
StLNC0001	MSTRG.17258.17	0.33804
StLNC0001	PGSC0003DMT400034529	0.337889
StLNC0001	MSTRG.27207.27	0.337859
StLNC0001	MSTRG.2819.2	0.337723
StLNC0001	PGSC0003DMT400007349	0.337714
StLNC0001	MSTRG.15433.2	0.337672
StLNC0001	MSTRG.17026.2	0.337636
StLNC0001	MSTRG.24291.4	0.337628
StLNC0001	PGSC0003DMT400046550	0.33755
StLNC0001	MSTRG.3456.2	0.337528
StLNC0001	PGSC0003DMT400083153	0.337491
StLNC0001	PGSC0003DMT400017184	0.337462
StLNC0001	MSTRG.15809.1	0.337438
StLNC0001	MSTRG.13810.7	0.337407
StLNC0001	MSTRG.17081.2	0.337403
StLNC0001	PGSC0003DMT400027391	0.337313
StLNC0001	MSTRG.3989.2	0.33731
StLNC0001	PGSC0003DMT400050351	0.337154
StLNC0001	MSTRG.11597.3	0.336823
StLNC0001	PGSC0003DMT400001203	0.336811
StLNC0001	MSTRG.6238.2	0.336636
StLNC0001	MSTRG.12287.2	0.336608
StLNC0001	PGSC0003DMT400082454	0.336574
StLNC0001	MSTRG.7116.3	0.336457
StLNC0001	MSTRG.23961.2	0.33644
StLNC0001	MSTRG.29317.84	0.336174
StLNC0001	MSTRG.9253.2	0.336115
StLNC0001	MSTRG.21981.3	0.335986
StLNC0001	MSTRG.9989.2	0.335928
StLNC0001	MSTRG.11236.4	0.335893
StLNC0001	MSTRG.20441.2	0.335603
StLNC0001	MSTRG.19243.1	0.335485
StLNC0001	PGSC0003DMT400036456	0.335304
StLNC0001	MSTRG.23387.3	0.335279
StLNC0001	MSTRG.27772.7	0.335245
StLNC0001	MSTRG.2732.8	0.335224
StLNC0001	PGSC0003DMT400007780	0.335149
StLNC0001	MSTRG.4832.1	0.33505
StLNC0001	MSTRG.15107.32	0.334887
StLNC0001	PGSC0003DMT400009764	0.334729
StLNC0001	MSTRG.22037.9	0.334729
StLNC0001	MSTRG.18882.2	0.33459
StLNC0001	MSTRG.20128.7	0.334531
StLNC0001	MSTRG.24892.2	0.334483
StLNC0001	MSTRG.6630.1	0.334419
StLNC0001	MSTRG.19249.3	0.333737
StLNC0001	MSTRG.23387.7	0.333623
StLNC0001	PGSC0003DMT400077375	0.333466
StLNC0001	MSTRG.23875.2	0.333439
StLNC0001	PGSC0003DMT400049440	0.333398
StLNC0001	PGSC0003DMT400039402	0.333321
StLNC0001	MSTRG.6824.4	0.333172
StLNC0001	PGSC0003DMT400069274	0.333153
StLNC0001	MSTRG.2638.7	0.332979
StLNC0001	PGSC0003DMT400067142	0.332876
StLNC0001	MSTRG.2857.2	0.332824
StLNC0001	MSTRG.13870.8	0.332803
StLNC0001	MSTRG.3308.2	0.332768
StLNC0001	MSTRG.10325.6	0.332234
StLNC0001	MSTRG.27127.2	0.331907
StLNC0001	PGSC0003DMT400001682	0.33179
StLNC0001	MSTRG.19839.2	0.331357
StLNC0001	MSTRG.292.28	0.331185
StLNC0001	MSTRG.20483.1	0.331169
StLNC0001	MSTRG.11701.18	0.331157
StLNC0001	PGSC0003DMT400059465	0.331029
StLNC0001	MSTRG.16864.14	0.330628
StLNC0001	MSTRG.27649.3	0.330613
StLNC0001	MSTRG.26234.2	0.330603
StLNC0001	MSTRG.3588.11	0.330294
StLNC0001	MSTRG.11341.2	0.330291
StLNC0001	PGSC0003DMT400014582	0.330208
StLNC0001	MSTRG.29127.2	0.330116
StLNC0001	MSTRG.9524.2	0.329969
StLNC0001	MSTRG.20042.1	0.329962
StLNC0001	MSTRG.22343.1	0.329794
StLNC0001	MSTRG.17765.3	0.329706
StLNC0001	MSTRG.26844.1	0.329529
StLNC0001	MSTRG.2834.1	0.329476
StLNC0001	MSTRG.2943.3	0.329445
StLNC0001	PGSC0003DMT400032327	0.329397
StLNC0001	MSTRG.6380.2	0.32915
StLNC0001	PGSC0003DMT400056320	0.329056
StLNC0001	PGSC0003DMT400057566	0.329005
StLNC0001	MSTRG.292.26	0.32887
StLNC0001	MSTRG.15408.1	0.328774
StLNC0001	MSTRG.13212.1	0.328759
StLNC0001	MSTRG.13413.3	0.328759
StLNC0001	MSTRG.26415.2	0.328608
StLNC0001	PGSC0003DMT400070458	0.328598
StLNC0001	MSTRG.28183.2	0.328567
StLNC0001	PGSC0003DMT400073916	0.328408
StLNC0001	PGSC0003DMT400063543	0.328335
StLNC0001	MSTRG.25293.2	0.328264
StLNC0001	MSTRG.27680.5	0.32819
StLNC0001	MSTRG.25631.6	0.328153
StLNC0001	PGSC0003DMT400076457	0.327903
StLNC0001	MSTRG.2792.3	0.327795
StLNC0001	MSTRG.17255.3	0.327592
StLNC0001	MSTRG.3085.3	0.327086
StLNC0001	MSTRG.23220.3	0.327029
StLNC0001	MSTRG.6447.1	0.326986
StLNC0001	PGSC0003DMT400046636	0.326859
StLNC0001	MSTRG.14333.4	0.326834
StLNC0001	MSTRG.20120.1	0.326706
StLNC0001	MSTRG.12219.10	0.326679
StLNC0001	MSTRG.602.2	0.32666
StLNC0001	MSTRG.17664.3	0.326449
StLNC0001	PGSC0003DMT400039266	0.326263
StLNC0001	MSTRG.15924.2	0.326255
StLNC0001	MSTRG.16664.5	0.326179
StLNC0001	MSTRG.11727.11	0.32612
StLNC0001	MSTRG.7884.5	0.32604
StLNC0001	PGSC0003DMT400035264	0.325985
StLNC0001	MSTRG.16657.4	0.325723
StLNC0001	MSTRG.5598.1	0.325722
StLNC0001	MSTRG.5517.5	0.325665
StLNC0001	PGSC0003DMT400042093	0.325521
StLNC0001	MSTRG.20189.4	0.325372
StLNC0001	MSTRG.19291.2	0.325204
StLNC0001	MSTRG.13145.4	0.325083
StLNC0001	PGSC0003DMT400056501	0.325082
StLNC0001	MSTRG.15807.1	0.324984
StLNC0001	MSTRG.1011.2	0.324839
StLNC0001	MSTRG.5305.2	0.32479
StLNC0001	MSTRG.12462.5	0.324687
StLNC0001	MSTRG.3487.2	0.324615
StLNC0001	MSTRG.5519.1	0.324466
StLNC0001	MSTRG.3178.2	0.324436
StLNC0001	MSTRG.11201.2	0.324406
StLNC0001	MSTRG.20409.1	0.324273
StLNC0001	MSTRG.13959.1	0.324008
StLNC0001	MSTRG.20363.2	0.323996
StLNC0001	MSTRG.18326.3	0.323978
StLNC0001	MSTRG.24198.6	0.323928
StLNC0001	PGSC0003DMT400059543	0.323814
StLNC0001	MSTRG.5353.8	0.323508
StLNC0001	MSTRG.14449.4	0.323443
StLNC0001	MSTRG.17258.19	0.32344
StLNC0001	MSTRG.2732.10	0.323306
StLNC0001	MSTRG.27887.2	0.323138
StLNC0001	MSTRG.18290.16	0.323102
StLNC0001	MSTRG.26269.2	0.32306
StLNC0001	MSTRG.11410.3	0.322904
StLNC0001	MSTRG.3942.2	0.322769
StLNC0001	MSTRG.6206.3	0.322735
StLNC0001	PGSC0003DMT400039813	0.32265
StLNC0001	MSTRG.20729.2	0.322608
StLNC0001	MSTRG.25407.19	0.32248
StLNC0001	PGSC0003DMT400046742	0.322238
StLNC0001	MSTRG.29309.2	0.32219
StLNC0001	MSTRG.6082.2	0.322163
StLNC0001	MSTRG.317.5	0.322132
StLNC0001	MSTRG.19771.3	0.322094
StLNC0001	MSTRG.1977.5	0.321875
StLNC0001	MSTRG.1985.4	0.321864
StLNC0001	MSTRG.10998.3	0.321803
StLNC0001	MSTRG.19118.2	0.32167
StLNC0001	MSTRG.1534.3	0.321561
StLNC0001	MSTRG.29261.2	0.321481
StLNC0001	MSTRG.17394.2	0.321473
StLNC0001	MSTRG.7948.3	0.321346
StLNC0001	PGSC0003DMT400020124	0.321116
StLNC0001	MSTRG.6201.4	0.321071
StLNC0001	MSTRG.10409.3	0.321056
StLNC0001	MSTRG.24022.1	0.321037
StLNC0001	MSTRG.10806.3	0.32101
StLNC0001	MSTRG.3899.6	0.320971
StLNC0001	MSTRG.12875.5	0.320879
StLNC0001	MSTRG.26449.4	0.320802
StLNC0001	MSTRG.1163.7	0.320775
StLNC0001	PGSC0003DMT400016615	0.320727
StLNC0001	MSTRG.29480.2	0.32059
StLNC0001	MSTRG.2824.3	0.32053
StLNC0001	MSTRG.3964.10	0.320484
StLNC0001	MSTRG.12103.2	0.319882
StLNC0001	MSTRG.6498.2	0.319856
StLNC0001	MSTRG.24218.7	0.319853
StLNC0001	MSTRG.24282.1	0.319808
StLNC0001	MSTRG.25123.3	0.319525
StLNC0001	MSTRG.18080.2	0.319391
StLNC0001	MSTRG.24485.1	0.319115
StLNC0001	MSTRG.21735.1	0.31911
StLNC0001	MSTRG.8096.1	0.319107
StLNC0001	MSTRG.22085.1	0.319097
StLNC0001	MSTRG.28016.3	0.318886
StLNC0001	MSTRG.8271.1	0.318775
StLNC0001	PGSC0003DMT400063009	0.318753
StLNC0001	MSTRG.17622.2	0.318683
StLNC0001	MSTRG.26076.4	0.318507
StLNC0001	MSTRG.3359.4	0.318433
StLNC0001	PGSC0003DMT400068522	0.318406
StLNC0001	MSTRG.11311.2	0.318319
StLNC0001	MSTRG.6426.4	0.318053
StLNC0001	MSTRG.26594.18	0.318049
StLNC0001	MSTRG.23541.3	0.317953
StLNC0001	MSTRG.13690.3	0.317948
StLNC0001	MSTRG.28447.3	0.317928
StLNC0001	MSTRG.6919.6	0.317657
StLNC0001	PGSC0003DMT400025346	0.317656
StLNC0001	MSTRG.18139.2	0.317626
StLNC0001	MSTRG.11965.2	0.317559
StLNC0001	PGSC0003DMT400076803	0.317449
StLNC0001	MSTRG.6317.1	0.31738
StLNC0001	MSTRG.15961.2	0.31724
StLNC0001	PGSC0003DMT400067393	0.317194
StLNC0001	MSTRG.25957.1	0.31705
StLNC0001	MSTRG.14518.1	0.317039
StLNC0001	MSTRG.5286.9	0.317032
StLNC0001	PGSC0003DMT400068776	0.316729
StLNC0001	PGSC0003DMT400062984	0.316698
StLNC0001	MSTRG.26020.3	0.316677
StLNC0001	MSTRG.28651.3	0.316384
StLNC0001	MSTRG.27359.4	0.316381
StLNC0001	MSTRG.21721.2	0.316318
StLNC0001	MSTRG.28168.1	0.316251
StLNC0001	MSTRG.22247.5	0.316232
StLNC0001	MSTRG.11038.1	0.316209
StLNC0001	MSTRG.8166.1	0.316142
StLNC0001	MSTRG.9322.3	0.316064
StLNC0001	MSTRG.21257.3	0.315968
StLNC0001	MSTRG.26959.3	0.315923
StLNC0001	MSTRG.1039.2	0.315799
StLNC0001	PGSC0003DMT400095795	0.315745
StLNC0001	MSTRG.13598.5	0.315611
StLNC0001	MSTRG.5102.3	0.315591
StLNC0001	MSTRG.12282.2	0.31541
StLNC0001	MSTRG.24696.24	0.3154
StLNC0001	MSTRG.6385.1	0.315321
StLNC0001	PGSC0003DMT400056104	0.315244
StLNC0001	PGSC0003DMT400064143	0.315234
StLNC0001	PGSC0003DMT400019943	0.315206
StLNC0001	MSTRG.22282.1	0.315132
StLNC0001	MSTRG.27576.2	0.314881
StLNC0001	PGSC0003DMT400032424	0.314876
StLNC0001	MSTRG.27474.2	0.314828
StLNC0001	MSTRG.29298.1	0.314763
StLNC0001	MSTRG.7974.1	0.31462
StLNC0001	PGSC0003DMT400016503	0.314519
StLNC0001	PGSC0003DMT400040154	0.314489
StLNC0001	MSTRG.18837.5	0.314438
StLNC0001	MSTRG.8319.3	0.314365
StLNC0001	MSTRG.2638.12	0.314337
StLNC0001	PGSC0003DMT400054145	0.314322
StLNC0001	MSTRG.10484.3	0.31418
StLNC0001	PGSC0003DMT400078829	0.314043
StLNC0001	MSTRG.29313.36	0.313997
StLNC0001	MSTRG.18970.3	0.313687
StLNC0001	MSTRG.8224.14	0.313621
StLNC0001	MSTRG.2137.4	0.313441
StLNC0001	MSTRG.10782.1	0.313423
StLNC0001	MSTRG.16905.3	0.313383
StLNC0001	PGSC0003DMT400034208	0.313334
StLNC0001	MSTRG.28114.4	0.313233
StLNC0001	MSTRG.29478.1	0.313168
StLNC0001	MSTRG.11549.2	0.313107
StLNC0001	MSTRG.4859.1	0.3131
StLNC0001	MSTRG.25110.2	0.313029
StLNC0001	PGSC0003DMT400070593	0.312973
StLNC0001	MSTRG.18290.14	0.312859
StLNC0001	MSTRG.8813.4	0.312829
StLNC0001	MSTRG.5188.3	0.312612
StLNC0001	MSTRG.28404.1	0.312572
StLNC0001	MSTRG.20933.1	0.312553
StLNC0001	MSTRG.19370.1	0.312507
StLNC0001	PGSC0003DMT400056952	0.31237
StLNC0001	PGSC0003DMT400026075	0.312357
StLNC0001	MSTRG.29313.2	0.312339
StLNC0001	PGSC0003DMT400048358	0.312339
StLNC0001	PGSC0003DMT400031677	0.312151
StLNC0001	MSTRG.18560.2	0.312032
StLNC0001	PGSC0003DMT400028126	0.312032
StLNC0001	PGSC0003DMT400009006	0.311954
StLNC0001	PGSC0003DMT400076118	0.311939
StLNC0001	MSTRG.21876.9	0.311926
StLNC0001	MSTRG.10588.2	0.31192
StLNC0001	MSTRG.10898.1	0.311786
StLNC0001	PGSC0003DMT400083932	0.311731
StLNC0001	PGSC0003DMT400009766	0.311699
StLNC0001	MSTRG.23655.3	0.311618
StLNC0001	MSTRG.2125.12	0.311576
StLNC0001	MSTRG.4954.3	0.311524
StLNC0001	MSTRG.13508.1	0.311492
StLNC0001	MSTRG.10918.1	0.311216
StLNC0001	MSTRG.29317.73	0.31112
StLNC0001	MSTRG.7112.7	0.311107
StLNC0001	MSTRG.26528.3	0.311059
StLNC0001	MSTRG.6413.3	0.311038
StLNC0001	PGSC0003DMT400082077	0.311005
StLNC0001	MSTRG.1657.12	0.310835
StLNC0001	MSTRG.63.2	0.310791
StLNC0001	PGSC0003DMT400013045	0.310781
StLNC0001	MSTRG.23297.3	0.310747
StLNC0001	MSTRG.8613.1	0.310645
StLNC0001	MSTRG.13639.1	0.310588
StLNC0001	MSTRG.5371.2	0.310534
StLNC0001	PGSC0003DMT400081210	0.310417
StLNC0001	MSTRG.10921.2	0.310264
StLNC0001	MSTRG.11887.2	0.310249
StLNC0001	MSTRG.8058.2	0.310043
StLNC0001	MSTRG.17279.9	0.309936
StLNC0001	MSTRG.6264.2	0.309836
StLNC0001	MSTRG.20139.2	0.309806
StLNC0001	MSTRG.17998.5	0.3098
StLNC0001	MSTRG.307.4	0.309793
StLNC0001	MSTRG.12308.5	0.30972
StLNC0001	MSTRG.17525.3	0.309624
StLNC0001	MSTRG.28587.4	0.309442
StLNC0001	MSTRG.15522.3	0.309423
StLNC0001	PGSC0003DMT400037388	0.309393
StLNC0001	PGSC0003DMT400016945	0.309318
StLNC0001	MSTRG.24680.2	0.309226
StLNC0001	MSTRG.1869.11	0.309211
StLNC0001	MSTRG.4311.7	0.308937
StLNC0001	MSTRG.2246.3	0.308937
StLNC0001	MSTRG.23752.5	0.308885
StLNC0001	MSTRG.17255.1	0.308876
StLNC0001	MSTRG.17843.2	0.308845
StLNC0001	MSTRG.7063.11	0.308785
StLNC0001	MSTRG.12308.2	0.308752
StLNC0001	MSTRG.5509.3	0.308718
StLNC0001	PGSC0003DMT400027378	0.308372
StLNC0001	MSTRG.21456.7	0.308305
StLNC0001	MSTRG.13309.3	0.308271
StLNC0001	MSTRG.11174.1	0.308262
StLNC0001	MSTRG.14626.7	0.308226
StLNC0001	MSTRG.20065.2	0.308181
StLNC0001	MSTRG.3302.15	0.308166
StLNC0001	MSTRG.4533.1	0.308128
StLNC0001	MSTRG.10837.2	0.307974
StLNC0001	MSTRG.957.1	0.307935
StLNC0001	PGSC0003DMT400014409	0.307917
StLNC0001	MSTRG.7712.6	0.307756
StLNC0001	MSTRG.17291.2	0.307497
StLNC0001	MSTRG.27345.1	0.307341
StLNC0001	MSTRG.20602.4	0.307325
StLNC0001	MSTRG.21789.3	0.307316
StLNC0001	MSTRG.20474.2	0.307314
StLNC0001	MSTRG.5106.2	0.307277
StLNC0001	PGSC0003DMT400004165	0.30727
StLNC0001	PGSC0003DMT400052354	0.307252
StLNC0001	PGSC0003DMT400052173	0.307152
StLNC0001	PGSC0003DMT400079195	0.307136
StLNC0001	MSTRG.26323.6	0.306997
StLNC0001	MSTRG.4209.3	0.306975
StLNC0001	MSTRG.27160.10	0.306974
StLNC0001	MSTRG.20751.5	0.30694
StLNC0001	MSTRG.22657.1	0.306832
StLNC0001	MSTRG.27756.4	0.30673
StLNC0001	MSTRG.1700.1	0.306633
StLNC0001	MSTRG.20968.3	0.306602
StLNC0001	MSTRG.17356.14	0.306564
StLNC0001	PGSC0003DMT400043508	0.306403
StLNC0001	MSTRG.7443.6	0.306378
StLNC0001	MSTRG.28936.2	0.306237
StLNC0001	MSTRG.24162.6	0.3061
StLNC0001	MSTRG.17653.2	0.305963
StLNC0001	MSTRG.19263.2	0.305907
StLNC0001	MSTRG.11820.2	0.305886
StLNC0001	MSTRG.5370.4	0.305883
StLNC0001	MSTRG.12019.1	0.305875
StLNC0001	MSTRG.24340.13	0.305859
StLNC0001	MSTRG.15818.2	0.305821
StLNC0001	MSTRG.26861.2	0.30562
StLNC0001	MSTRG.10998.18	0.305615
StLNC0001	MSTRG.13976.2	0.305584
StLNC0001	MSTRG.1.4	0.305485
StLNC0001	MSTRG.26242.1	0.305467
StLNC0001	MSTRG.28500.1	0.30542
StLNC0001	PGSC0003DMT400021317	0.305277
StLNC0001	MSTRG.20141.4	0.305275
StLNC0001	MSTRG.3908.1	0.305259
StLNC0001	MSTRG.3622.3	0.305201
StLNC0001	MSTRG.21010.3	0.305158
StLNC0001	MSTRG.17717.1	0.304852
StLNC0001	MSTRG.17660.1	0.304701
StLNC0001	PGSC0003DMT400027896	0.304697
StLNC0001	MSTRG.18059.6	0.304625
StLNC0001	MSTRG.20477.2	0.304568
StLNC0001	MSTRG.292.19	0.304529
StLNC0001	PGSC0003DMT400043751	0.304449
StLNC0001	MSTRG.18810.5	0.30431
StLNC0001	MSTRG.18322.3	0.304266
StLNC0001	PGSC0003DMT400043829	0.304199
StLNC0001	MSTRG.19847.3	0.304067
StLNC0001	MSTRG.27248.2	0.303903
StLNC0001	MSTRG.26839.1	0.303838
StLNC0001	MSTRG.1663.6	0.303828
StLNC0001	MSTRG.14466.3	0.303734
StLNC0001	PGSC0003DMT400011138	0.303579
StLNC0001	PGSC0003DMT400027539	0.303568
StLNC0001	PGSC0003DMT400076000	0.303505
StLNC0001	PGSC0003DMT400007163	0.30344
StLNC0001	MSTRG.10752.6	0.303376
StLNC0001	PGSC0003DMT400058010	0.303334
StLNC0001	MSTRG.7738.3	0.303194
StLNC0001	MSTRG.1651.1	0.303178
StLNC0001	MSTRG.23572.3	0.30307
StLNC0001	MSTRG.29317.20	0.302993
StLNC0001	MSTRG.9638.1	0.30291
StLNC0001	MSTRG.10620.2	0.302905
StLNC0001	MSTRG.3349.3	0.302901
StLNC0001	MSTRG.13790.3	0.302846
StLNC0001	MSTRG.7950.1	0.30281
StLNC0001	PGSC0003DMT400039408	0.302643
StLNC0001	MSTRG.23245.25	0.302616
StLNC0001	MSTRG.9160.1	0.302543
StLNC0001	MSTRG.1498.7	0.30251
StLNC0001	MSTRG.14696.4	0.302504
StLNC0001	MSTRG.7715.5	0.302502
StLNC0001	MSTRG.19415.3	0.302385
StLNC0001	MSTRG.24041.5	0.302383
StLNC0001	PGSC0003DMT400094382	0.302204
StLNC0001	MSTRG.18885.1	0.302197
StLNC0001	PGSC0003DMT400043584	0.302109
StLNC0001	MSTRG.14864.2	0.302067
StLNC0001	MSTRG.2931.3	0.301993
StLNC0001	MSTRG.7846.4	0.301924
StLNC0001	MSTRG.12771.1	0.301726
StLNC0001	MSTRG.18202.1	0.301655
StLNC0001	MSTRG.22182.7	0.301593
StLNC0001	MSTRG.20987.4	0.30157
StLNC0001	PGSC0003DMT400047938	0.301533
StLNC0001	MSTRG.17185.5	0.301491
StLNC0001	MSTRG.10084.1	0.301474
StLNC0001	PGSC0003DMT400083786	0.301439
StLNC0001	MSTRG.1180.5	0.301298
StLNC0001	MSTRG.17033.1	0.301238
StLNC0001	MSTRG.26486.3	0.301192
StLNC0001	PGSC0003DMT400075993	0.301108
StLNC0001	MSTRG.4953.10	0.301093
StLNC0001	MSTRG.24696.20	0.301036
StLNC0001	MSTRG.25564.2	0.301033
StLNC0001	MSTRG.18996.4	0.301027
StLNC0001	MSTRG.9078.1	0.301027
StLNC0001	PGSC0003DMT400023968	0.300984
StLNC0001	MSTRG.28119.4	0.300946
StLNC0001	MSTRG.13642.1	0.300875
StLNC0001	MSTRG.15088.1	0.30085
StLNC0001	MSTRG.1657.17	0.300811
StLNC0001	MSTRG.27636.1	0.300685
StLNC0001	MSTRG.12764.2	0.300678
StLNC0001	MSTRG.2220.2	0.300523
StLNC0001	MSTRG.20028.1	0.300403
StLNC0001	MSTRG.2301.1	0.300399
StLNC0001	MSTRG.4713.1	0.30029
StLNC0001	MSTRG.1243.34	0.300207
StLNC0001	PGSC0003DMT400045376	0.300033
StLNC0002	PGSC0003DMT400064343	0.314073
StLNC0002	MSTRG.21669.3	0.313726
StLNC0002	MSTRG.18833.1	0.309802
StLNC0002	MSTRG.20859.3	0.309722
StLNC0002	MSTRG.22053.4	0.308738
StLNC0002	MSTRG.20262.7	0.308545
StLNC0002	MSTRG.219.1	0.307791
StLNC0002	MSTRG.8529.13	0.306365
StLNC0002	PGSC0003DMT400082464	0.304415
StLNC0002	MSTRG.27896.1	0.303944
StLNC0002	PGSC0003DMT400043405	0.301644
StLNC0002	MSTRG.12926.5	0.301421
StLNC0002	MSTRG.20849.2	0.301225
StLNC0002	PGSC0003DMT400056500	0.300745
StLNC0002	MSTRG.22204.3	0.300684
StLNC0002	MSTRG.4276.3	0.300375
StLNC0003	MSTRG.28073.8	0.380313
StLNC0003	MSTRG.19455.6	0.363695
StLNC0003	PGSC0003DMT400078032	0.35913
StLNC0003	MSTRG.12650.10	0.358697
StLNC0003	MSTRG.29371.14	0.355806
StLNC0003	MSTRG.15029.1	0.354784
StLNC0003	MSTRG.9095.1	0.353653
StLNC0003	MSTRG.15607.5	0.350558
StLNC0003	PGSC0003DMT400026445	0.350508
StLNC0003	MSTRG.1173.3	0.350393
StLNC0003	MSTRG.6656.2	0.349462
StLNC0003	MSTRG.10058.1	0.348375
StLNC0003	MSTRG.23245.32	0.348035
StLNC0003	MSTRG.17359.3	0.347806
StLNC0003	MSTRG.1388.3	0.346979
StLNC0003	MSTRG.19960.3	0.346542
StLNC0003	MSTRG.25904.2	0.345819
StLNC0003	PGSC0003DMT400010069	0.345799
StLNC0003	PGSC0003DMT400012818	0.345793
StLNC0003	MSTRG.20700.2	0.345676
StLNC0003	MSTRG.22643.4	0.345497
StLNC0003	PGSC0003DMT400049354	0.342681
StLNC0003	MSTRG.499.3	0.342589
StLNC0003	MSTRG.5500.6	0.342182
StLNC0003	MSTRG.26867.3	0.341193
StLNC0003	MSTRG.13662.1	0.340215
StLNC0003	MSTRG.25993.1	0.339688
StLNC0003	MSTRG.10196.2	0.339373
StLNC0003	MSTRG.25848.9	0.339097
StLNC0003	MSTRG.17844.6	0.338191
StLNC0003	PGSC0003DMT400048639	0.338086
StLNC0003	MSTRG.25041.3	0.337941
StLNC0003	MSTRG.28215.2	0.337257
StLNC0003	MSTRG.220.4	0.337208
StLNC0003	MSTRG.23425.3	0.336713
StLNC0003	MSTRG.21478.6	0.336634
StLNC0003	MSTRG.6353.3	0.336548
StLNC0003	MSTRG.24647.3	0.33618
StLNC0003	MSTRG.13132.23	0.335503
StLNC0003	PGSC0003DMT400047978	0.335097
StLNC0003	MSTRG.25975.2	0.334716
StLNC0003	MSTRG.18485.2	0.33457
StLNC0003	MSTRG.27273.2	0.334111
StLNC0003	MSTRG.19962.2	0.333391
StLNC0003	MSTRG.22740.12	0.333325
StLNC0003	MSTRG.28130.3	0.333082
StLNC0003	MSTRG.12462.9	0.332808
StLNC0003	MSTRG.22634.2	0.332271
StLNC0003	MSTRG.23236.1	0.332257
StLNC0003	PGSC0003DMT400060391	0.331855
StLNC0003	PGSC0003DMT400031910	0.331444
StLNC0003	MSTRG.26801.2	0.330855
StLNC0003	MSTRG.9145.7	0.330663
StLNC0003	MSTRG.21969.4	0.330437
StLNC0003	MSTRG.8666.4	0.330391
StLNC0003	MSTRG.8117.8	0.330249
StLNC0003	MSTRG.16502.5	0.329764
StLNC0003	MSTRG.2686.3	0.329661
StLNC0003	MSTRG.12294.4	0.329657
StLNC0003	MSTRG.23245.27	0.329518
StLNC0003	MSTRG.17379.1	0.329287
StLNC0003	PGSC0003DMT400017416	0.329197
StLNC0003	PGSC0003DMT400018476	0.329084
StLNC0003	MSTRG.2270.3	0.328272
StLNC0003	MSTRG.14495.3	0.328185
StLNC0003	MSTRG.22836.1	0.32786
StLNC0003	MSTRG.16843.2	0.327262
StLNC0003	PGSC0003DMT400026207	0.326956
StLNC0003	PGSC0003DMT400053339	0.326718
StLNC0003	MSTRG.26415.4	0.326604
StLNC0003	MSTRG.26594.8	0.326424
StLNC0003	MSTRG.513.5	0.326176
StLNC0003	MSTRG.23991.2	0.326077
StLNC0003	PGSC0003DMT400045551	0.326067
StLNC0003	MSTRG.1688.1	0.325953
StLNC0003	MSTRG.23026.3	0.325857
StLNC0003	MSTRG.6508.1	0.32577
StLNC0003	MSTRG.1774.4	0.325404
StLNC0003	MSTRG.22854.4	0.324913
StLNC0003	MSTRG.19911.5	0.324585
StLNC0003	PGSC0003DMT400017667	0.324075
StLNC0003	MSTRG.16864.9	0.324057
StLNC0003	MSTRG.7884.3	0.323845
StLNC0003	MSTRG.15395.3	0.32378
StLNC0003	MSTRG.1097.3	0.323448
StLNC0003	MSTRG.23597.6	0.323448
StLNC0003	MSTRG.15178.1	0.323376
StLNC0003	MSTRG.22304.3	0.323287
StLNC0003	MSTRG.19212.2	0.323213
StLNC0003	MSTRG.12194.4	0.32321
StLNC0003	MSTRG.28436.3	0.32318
StLNC0003	MSTRG.15856.3	0.323085
StLNC0003	MSTRG.25492.17	0.322982
StLNC0003	MSTRG.23272.5	0.322622
StLNC0003	MSTRG.19755.5	0.322615
StLNC0003	MSTRG.15781.3	0.322442
StLNC0003	MSTRG.6212.4	0.322329
StLNC0003	MSTRG.1454.2	0.322314
StLNC0003	MSTRG.1243.26	0.322177
StLNC0003	MSTRG.2125.7	0.322041
StLNC0003	MSTRG.23525.4	0.321918
StLNC0003	MSTRG.26680.3	0.321731
StLNC0003	MSTRG.19479.2	0.321551
StLNC0003	MSTRG.12545.9	0.321328
StLNC0003	MSTRG.11618.2	0.321081
StLNC0003	MSTRG.15107.14	0.320713
StLNC0003	MSTRG.15261.2	0.320529
StLNC0003	MSTRG.2603.6	0.320482
StLNC0003	MSTRG.1498.9	0.320478
StLNC0003	MSTRG.10752.4	0.320352
StLNC0003	MSTRG.29317.164	0.320235
StLNC0003	MSTRG.7908.4	0.320039
StLNC0003	MSTRG.22643.7	0.31982
StLNC0003	MSTRG.16113.7	0.319557
StLNC0003	MSTRG.23240.3	0.319472
StLNC0003	MSTRG.22141.1	0.319447
StLNC0003	MSTRG.5114.3	0.319355
StLNC0003	MSTRG.20936.4	0.319113
StLNC0003	MSTRG.4690.3	0.319111
StLNC0003	MSTRG.10717.4	0.318896
StLNC0003	MSTRG.8591.1	0.318701
StLNC0003	MSTRG.2158.2	0.318658
StLNC0003	MSTRG.6792.3	0.318598
StLNC0003	MSTRG.29258.2	0.318276
StLNC0003	MSTRG.10518.2	0.318058
StLNC0003	MSTRG.6581.4	0.318006
StLNC0003	MSTRG.23858.3	0.317954
StLNC0003	MSTRG.13184.5	0.317878
StLNC0003	MSTRG.22077.7	0.31783
StLNC0003	MSTRG.4286.3	0.317745
StLNC0003	MSTRG.14583.14	0.317571
StLNC0003	MSTRG.21166.1	0.317491
StLNC0003	MSTRG.6835.3	0.317464
StLNC0003	MSTRG.1994.8	0.317436
StLNC0003	MSTRG.15764.2	0.317313
StLNC0003	PGSC0003DMT400022251	0.3171
StLNC0003	MSTRG.19294.4	0.317068
StLNC0003	MSTRG.27558.2	0.317047
StLNC0003	MSTRG.17947.5	0.317
StLNC0003	MSTRG.27146.5	0.316948
StLNC0003	PGSC0003DMT400052040	0.31686
StLNC0003	MSTRG.11727.6	0.316675
StLNC0003	MSTRG.3320.9	0.316608
StLNC0003	PGSC0003DMT400049209	0.316354
StLNC0003	MSTRG.24643.2	0.316149
StLNC0003	MSTRG.2783.11	0.316033
StLNC0003	MSTRG.2993.6	0.315938
StLNC0003	MSTRG.18218.2	0.315904
StLNC0003	PGSC0003DMT400079371	0.315581
StLNC0003	MSTRG.9086.3	0.315067
StLNC0003	MSTRG.19165.3	0.315031
StLNC0003	MSTRG.1243.15	0.315011
StLNC0003	MSTRG.19313.1	0.31488
StLNC0003	MSTRG.7891.2	0.314854
StLNC0003	PGSC0003DMT400022642	0.314576
StLNC0003	MSTRG.19253.2	0.314364
StLNC0003	MSTRG.2473.5	0.314229
StLNC0003	MSTRG.11434.6	0.314111
StLNC0003	MSTRG.22066.5	0.314001
StLNC0003	MSTRG.14119.3	0.313824
StLNC0003	MSTRG.4841.1	0.31371
StLNC0003	MSTRG.10500.2	0.3136
StLNC0003	MSTRG.22057.2	0.31355
StLNC0003	PGSC0003DMT400031941	0.31346
StLNC0003	MSTRG.19668.2	0.313379
StLNC0003	MSTRG.499.6	0.313098
StLNC0003	MSTRG.11927.5	0.312962
StLNC0003	MSTRG.12306.2	0.31285
StLNC0003	MSTRG.16882.6	0.312817
StLNC0003	PGSC0003DMT400073904	0.312617
StLNC0003	PGSC0003DMT400035459	0.312592
StLNC0003	MSTRG.9591.4	0.312552
StLNC0003	MSTRG.4962.2	0.312507
StLNC0003	MSTRG.17005.3	0.312469
StLNC0003	MSTRG.15287.10	0.312275
StLNC0003	MSTRG.25594.2	0.312217
StLNC0003	MSTRG.5338.1	0.312101
StLNC0003	MSTRG.24038.3	0.311816
StLNC0003	MSTRG.27888.4	0.3118
StLNC0003	MSTRG.5761.3	0.31172
StLNC0003	MSTRG.3404.3	0.31167
StLNC0003	MSTRG.16234.2	0.311583
StLNC0003	MSTRG.11296.2	0.311541
StLNC0003	MSTRG.10916.4	0.311508
StLNC0003	MSTRG.22976.7	0.311423
StLNC0003	MSTRG.3804.3	0.311205
StLNC0003	MSTRG.11924.3	0.310851
StLNC0003	PGSC0003DMT400049940	0.310849
StLNC0003	PGSC0003DMT400046591	0.31084
StLNC0003	MSTRG.15997.3	0.310821
StLNC0003	MSTRG.23108.10	0.310725
StLNC0003	MSTRG.28628.5	0.310627
StLNC0003	MSTRG.14917.4	0.310468
StLNC0003	MSTRG.1812.7	0.310448
StLNC0003	MSTRG.13099.5	0.310402
StLNC0003	MSTRG.12015.2	0.310257
StLNC0003	MSTRG.8032.5	0.310099
StLNC0003	MSTRG.12726.10	0.309929
StLNC0003	MSTRG.5072.6	0.30971
StLNC0003	MSTRG.22923.2	0.30969
StLNC0003	MSTRG.23245.11	0.30956
StLNC0003	PGSC0003DMT400074962	0.309121
StLNC0003	MSTRG.19243.13	0.309096
StLNC0003	MSTRG.12588.6	0.309078
StLNC0003	MSTRG.1356.2	0.309064
StLNC0003	PGSC0003DMT400013748	0.308835
StLNC0003	MSTRG.23988.3	0.308616
StLNC0003	MSTRG.3347.4	0.308553
StLNC0003	MSTRG.11202.1	0.308359
StLNC0003	MSTRG.23472.8	0.308337
StLNC0003	PGSC0003DMT400085026	0.307828
StLNC0003	PGSC0003DMT400016437	0.307721
StLNC0003	MSTRG.11254.2	0.307399
StLNC0003	MSTRG.26951.1	0.307303
StLNC0003	MSTRG.14991.6	0.307179
StLNC0003	MSTRG.7174.1	0.307154
StLNC0003	MSTRG.5491.2	0.307112
StLNC0003	MSTRG.9673.6	0.307024
StLNC0003	MSTRG.27367.9	0.306987
StLNC0003	MSTRG.6426.6	0.306867
StLNC0003	MSTRG.4684.3	0.306754
StLNC0003	PGSC0003DMT400050588	0.306706
StLNC0003	MSTRG.29317.181	0.306609
StLNC0003	MSTRG.3588.7	0.306594
StLNC0003	MSTRG.20529.6	0.306413
StLNC0003	MSTRG.10816.2	0.306366
StLNC0003	MSTRG.18027.3	0.306235
StLNC0003	MSTRG.8092.5	0.306106
StLNC0003	MSTRG.510.1	0.306015
StLNC0003	MSTRG.28014.4	0.305952
StLNC0003	MSTRG.20906.2	0.305929
StLNC0003	MSTRG.8419.5	0.305893
StLNC0003	MSTRG.27353.4	0.30578
StLNC0003	MSTRG.26428.3	0.305776
StLNC0003	MSTRG.12588.2	0.305695
StLNC0003	MSTRG.985.1	0.3056
StLNC0003	MSTRG.6015.3	0.305526
StLNC0003	MSTRG.12028.1	0.305315
StLNC0003	MSTRG.1915.2	0.30531
StLNC0003	MSTRG.23599.1	0.305184
StLNC0003	MSTRG.22037.10	0.305063
StLNC0003	MSTRG.11254.47	0.304889
StLNC0003	PGSC0003DMT400083896	0.304824
StLNC0003	MSTRG.21791.4	0.304697
StLNC0003	MSTRG.25779.2	0.304665
StLNC0003	MSTRG.3037.2	0.304643
StLNC0003	PGSC0003DMT400063220	0.304551
StLNC0003	MSTRG.11529.4	0.304509
StLNC0003	MSTRG.7908.8	0.304432
StLNC0003	MSTRG.17258.6	0.304387
StLNC0003	PGSC0003DMT400065792	0.304336
StLNC0003	MSTRG.13595.4	0.30428
StLNC0003	MSTRG.19726.2	0.304253
StLNC0003	MSTRG.12924.4	0.304245
StLNC0003	MSTRG.29317.169	0.304183
StLNC0003	PGSC0003DMT400056077	0.304048
StLNC0003	MSTRG.28.1	0.304045
StLNC0003	MSTRG.8430.6	0.30385
StLNC0003	MSTRG.25716.7	0.303814
StLNC0003	PGSC0003DMT400008083	0.303714
StLNC0003	MSTRG.18192.2	0.303674
StLNC0003	MSTRG.16633.4	0.30366
StLNC0003	PGSC0003DMT400066294	0.303572
StLNC0003	PGSC0003DMT400060279	0.30357
StLNC0003	MSTRG.22452.5	0.303521
StLNC0003	MSTRG.28565.1	0.303306
StLNC0003	MSTRG.60.9	0.303291
StLNC0003	MSTRG.875.1	0.303036
StLNC0003	MSTRG.17544.4	0.302847
StLNC0003	MSTRG.5442.2	0.302829
StLNC0003	PGSC0003DMT400061441	0.302783
StLNC0003	MSTRG.12147.7	0.302752
StLNC0003	MSTRG.517.8	0.302749
StLNC0003	MSTRG.13131.3	0.302591
StLNC0003	MSTRG.9322.6	0.302567
StLNC0003	MSTRG.9748.4	0.302467
StLNC0003	MSTRG.23875.4	0.302449
StLNC0003	MSTRG.22460.2	0.302418
StLNC0003	MSTRG.28851.2	0.302254
StLNC0003	MSTRG.14295.1	0.302226
StLNC0003	MSTRG.868.4	0.302182
StLNC0003	MSTRG.19119.5	0.302054
StLNC0003	MSTRG.4665.6	0.301668
StLNC0003	MSTRG.839.2	0.301542
StLNC0003	MSTRG.2502.4	0.30121
StLNC0003	MSTRG.27042.2	0.301065
StLNC0003	MSTRG.2732.4	0.301058
StLNC0003	MSTRG.4484.3	0.301003
StLNC0003	MSTRG.2697.1	0.300985
StLNC0003	MSTRG.24961.4	0.300819
StLNC0003	MSTRG.21613.3	0.300801
StLNC0003	PGSC0003DMT400048945	0.300781
StLNC0003	MSTRG.23719.2	0.300749
StLNC0003	MSTRG.2456.3	0.300727
StLNC0003	MSTRG.6105.2	0.300686
StLNC0003	MSTRG.20724.2	0.30031
StLNC0003	MSTRG.20753.2	0.300289
StLNC0003	MSTRG.22474.1	0.300198
StLNC0003	MSTRG.27351.8	0.300028
StLNC0003	PGSC0003DMT400034028	0.300026
StLNC0003	PGSC0003DMT400022781	0.300004
StLNC0004	PGSC0003DMT400050399	0.312969
StLNC0004	MSTRG.19772.2	0.311791
StLNC0004	MSTRG.16085.3	0.304137
StLNC0005	MSTRG.18854.3	0.428028
StLNC0005	MSTRG.4737.2	0.409282
StLNC0005	MSTRG.13086.3	0.404734
StLNC0005	MSTRG.27019.32	0.402499
StLNC0005	MSTRG.17165.5	0.402015
StLNC0005	MSTRG.2889.11	0.401696
StLNC0005	MSTRG.22405.1	0.398344
StLNC0005	MSTRG.27656.4	0.398125
StLNC0005	MSTRG.18622.2	0.396222
StLNC0005	PGSC0003DMT400020524	0.390624
StLNC0005	MSTRG.8468.2	0.389194
StLNC0005	MSTRG.28814.7	0.388377
StLNC0005	MSTRG.18203.10	0.384282
StLNC0005	MSTRG.24231.4	0.383656
StLNC0005	PGSC0003DMT400054395	0.382912
StLNC0005	MSTRG.23855.1	0.381988
StLNC0005	MSTRG.18058.1	0.38006
StLNC0005	MSTRG.14070.3	0.37931
StLNC0005	MSTRG.10312.3	0.374845
StLNC0005	MSTRG.16537.3	0.373467
StLNC0005	MSTRG.21327.2	0.371613
StLNC0005	MSTRG.1377.2	0.370043
StLNC0005	MSTRG.24340.10	0.369715
StLNC0005	MSTRG.7856.1	0.368894
StLNC0005	MSTRG.2295.2	0.368402
StLNC0005	MSTRG.19465.1	0.366982
StLNC0005	MSTRG.18663.2	0.366859
StLNC0005	MSTRG.16544.8	0.364352
StLNC0005	MSTRG.13558.1	0.363205
StLNC0005	PGSC0003DMT400008572	0.363181
StLNC0005	PGSC0003DMT400061777	0.36277
StLNC0005	PGSC0003DMT400020558	0.359155
StLNC0005	MSTRG.8399.2	0.358064
StLNC0005	MSTRG.28184.3	0.35761
StLNC0005	MSTRG.24568.4	0.356322
StLNC0005	MSTRG.9190.3	0.356269
StLNC0005	PGSC0003DMT400060974	0.356157
StLNC0005	MSTRG.7947.1	0.35531
StLNC0005	MSTRG.28313.3	0.353987
StLNC0005	MSTRG.6138.3	0.353805
StLNC0005	MSTRG.23490.6	0.353684
StLNC0005	PGSC0003DMT400018837	0.351493
StLNC0005	MSTRG.12172.6	0.351399
StLNC0005	MSTRG.21531.1	0.349836
StLNC0005	MSTRG.9988.3	0.349438
StLNC0005	MSTRG.27359.2	0.349296
StLNC0005	PGSC0003DMT400054370	0.348558
StLNC0005	MSTRG.17404.1	0.3483
StLNC0005	MSTRG.16610.4	0.348231
StLNC0005	MSTRG.20262.3	0.347807
StLNC0005	MSTRG.19578.1	0.347752
StLNC0005	MSTRG.7210.3	0.345833
StLNC0005	MSTRG.11603.4	0.34574
StLNC0005	MSTRG.25901.1	0.345608
StLNC0005	MSTRG.23175.2	0.345441
StLNC0005	MSTRG.25461.1	0.344245
StLNC0005	MSTRG.29410.6	0.34284
StLNC0005	MSTRG.14583.3	0.342783
StLNC0005	MSTRG.11042.1	0.342491
StLNC0005	MSTRG.7872.2	0.342305
StLNC0005	PGSC0003DMT400077738	0.341923
StLNC0005	MSTRG.24789.1	0.341096
StLNC0005	MSTRG.3823.1	0.340615
StLNC0005	MSTRG.6407.2	0.340369
StLNC0005	MSTRG.6427.2	0.339869
StLNC0005	MSTRG.21408.1	0.339069
StLNC0005	MSTRG.18837.1	0.338863
StLNC0005	MSTRG.18339.1	0.338523
StLNC0005	MSTRG.14917.1	0.338018
StLNC0005	MSTRG.17936.10	0.337464
StLNC0005	PGSC0003DMT400009359	0.337081
StLNC0005	MSTRG.10066.1	0.336288
StLNC0005	MSTRG.12462.7	0.335613
StLNC0005	MSTRG.15262.7	0.335578
StLNC0005	MSTRG.15736.1	0.335083
StLNC0005	MSTRG.1015.1	0.333722
StLNC0005	MSTRG.7927.2	0.333468
StLNC0005	PGSC0003DMT400066917	0.33326
StLNC0005	PGSC0003DMT400039249	0.331917
StLNC0005	MSTRG.18290.53	0.331601
StLNC0005	MSTRG.15501.3	0.331167
StLNC0005	MSTRG.9890.2	0.331086
StLNC0005	MSTRG.3537.1	0.330814
StLNC0005	MSTRG.8339.3	0.330791
StLNC0005	PGSC0003DMT400063999	0.330619
StLNC0005	MSTRG.28512.1	0.330157
StLNC0005	MSTRG.13277.4	0.330087
StLNC0005	MSTRG.15816.2	0.329314
StLNC0005	MSTRG.2279.6	0.328784
StLNC0005	MSTRG.13810.3	0.328209
StLNC0005	MSTRG.12399.1	0.32806
StLNC0005	MSTRG.28112.2	0.327976
StLNC0005	MSTRG.29317.71	0.327536
StLNC0005	PGSC0003DMT400083201	0.327508
StLNC0005	MSTRG.19243.9	0.32638
StLNC0005	MSTRG.19104.3	0.325363
StLNC0005	MSTRG.9039.2	0.325154
StLNC0005	PGSC0003DMT400012067	0.32462
StLNC0005	PGSC0003DMT400059950	0.323786
StLNC0005	MSTRG.22495.2	0.323711
StLNC0005	MSTRG.15088.2	0.323644
StLNC0005	MSTRG.21806.1	0.323151
StLNC0005	MSTRG.11279.3	0.32168
StLNC0005	MSTRG.6938.3	0.321611
StLNC0005	PGSC0003DMT400063026	0.321528
StLNC0005	MSTRG.29099.2	0.32066
StLNC0005	PGSC0003DMT400003982	0.320597
StLNC0005	MSTRG.7297.1	0.320498
StLNC0005	PGSC0003DMT400029246	0.320251
StLNC0005	MSTRG.5441.2	0.320184
StLNC0005	MSTRG.3320.8	0.320156
StLNC0005	MSTRG.24680.3	0.319402
StLNC0005	MSTRG.29101.3	0.319101
StLNC0005	MSTRG.19147.3	0.318969
StLNC0005	MSTRG.29317.77	0.318584
StLNC0005	MSTRG.16387.3	0.318519
StLNC0005	MSTRG.19684.1	0.318344
StLNC0005	MSTRG.16105.3	0.318309
StLNC0005	PGSC0003DMT400077961	0.317978
StLNC0005	MSTRG.18189.3	0.317925
StLNC0005	PGSC0003DMT400066186	0.317819
StLNC0005	MSTRG.18995.2	0.317734
StLNC0005	PGSC0003DMT400017806	0.31743
StLNC0005	MSTRG.25095.1	0.317183
StLNC0005	PGSC0003DMT400058625	0.316257
StLNC0005	MSTRG.16245.2	0.315555
StLNC0005	MSTRG.10385.8	0.314668
StLNC0005	MSTRG.25454.25	0.313878
StLNC0005	MSTRG.12057.2	0.313813
StLNC0005	MSTRG.23892.2	0.313509
StLNC0005	PGSC0003DMT400001856	0.31329
StLNC0005	MSTRG.2464.2	0.313285
StLNC0005	MSTRG.2166.1	0.313247
StLNC0005	MSTRG.27019.7	0.313159
StLNC0005	MSTRG.7.3	0.313004
StLNC0005	MSTRG.21124.3	0.312989
StLNC0005	PGSC0003DMT400078968	0.312757
StLNC0005	PGSC0003DMT400010233	0.312714
StLNC0005	MSTRG.2083.5	0.31246
StLNC0005	PGSC0003DMT400021634	0.312365
StLNC0005	PGSC0003DMT400001832	0.312219
StLNC0005	MSTRG.5898.2	0.312145
StLNC0005	MSTRG.23409.2	0.311847
StLNC0005	MSTRG.945.6	0.311839
StLNC0005	MSTRG.22419.1	0.311671
StLNC0005	PGSC0003DMT400004712	0.311447
StLNC0005	MSTRG.13255.2	0.310971
StLNC0005	MSTRG.3689.2	0.310938
StLNC0005	MSTRG.10798.3	0.310323
StLNC0005	PGSC0003DMT400079215	0.31017
StLNC0005	MSTRG.17262.3	0.309576
StLNC0005	MSTRG.28079.1	0.309059
StLNC0005	MSTRG.2752.3	0.309049
StLNC0005	PGSC0003DMT400092647	0.30868
StLNC0005	PGSC0003DMT400036160	0.308603
StLNC0005	MSTRG.17302.6	0.308256
StLNC0005	PGSC0003DMT400043024	0.308167
StLNC0005	PGSC0003DMT400047335	0.307492
StLNC0005	PGSC0003DMT400029139	0.307401
StLNC0005	PGSC0003DMT400042012	0.307377
StLNC0005	PGSC0003DMT400066470	0.307353
StLNC0005	MSTRG.15438.1	0.307351
StLNC0005	MSTRG.13355.3	0.307234
StLNC0005	MSTRG.5188.4	0.30718
StLNC0005	MSTRG.17165.1	0.306564
StLNC0005	MSTRG.28323.3	0.306365
StLNC0005	MSTRG.16605.1	0.305883
StLNC0005	MSTRG.21885.2	0.304841
StLNC0005	MSTRG.26864.1	0.304825
StLNC0005	MSTRG.26677.2	0.30453
StLNC0005	MSTRG.970.5	0.304032
StLNC0005	PGSC0003DMT400078351	0.304
StLNC0005	MSTRG.3483.21	0.30398
StLNC0005	PGSC0003DMT400036420	0.303703
StLNC0005	MSTRG.3987.1	0.30345
StLNC0005	MSTRG.8199.3	0.303358
StLNC0005	PGSC0003DMT400028257	0.303322
StLNC0005	PGSC0003DMT400018439	0.303109
StLNC0005	MSTRG.20557.2	0.30275
StLNC0005	PGSC0003DMT400064074	0.302556
StLNC0005	PGSC0003DMT400071055	0.302262
StLNC0005	MSTRG.11.4	0.30177
StLNC0005	PGSC0003DMT400078849	0.301633
StLNC0005	PGSC0003DMT400088995	0.30141
StLNC0005	MSTRG.20189.3	0.301373
StLNC0005	MSTRG.15369.2	0.301252
StLNC0005	MSTRG.19367.1	0.300962
StLNC0005	PGSC0003DMT400023203	0.300875
StLNC0005	MSTRG.29177.2	0.300858
StLNC0005	MSTRG.10157.2	0.300751
StLNC0006	PGSC0003DMT400007611	0.363088
StLNC0006	MSTRG.3359.2	0.355598
StLNC0006	PGSC0003DMT400033385	0.352988
StLNC0006	MSTRG.27122.6	0.350003
StLNC0006	MSTRG.19811.1	0.348611
StLNC0006	MSTRG.19248.1	0.34572
StLNC0006	PGSC0003DMT400055673	0.344766
StLNC0006	MSTRG.7908.8	0.342553
StLNC0006	PGSC0003DMT400077939	0.339968
StLNC0006	MSTRG.7953.1	0.33916
StLNC0006	PGSC0003DMT400038058	0.339152
StLNC0006	PGSC0003DMT400015696	0.338579
StLNC0006	PGSC0003DMT400068308	0.338197
StLNC0006	MSTRG.13473.1	0.335605
StLNC0006	MSTRG.11520.1	0.335149
StLNC0006	MSTRG.11701.10	0.333164
StLNC0006	PGSC0003DMT400062438	0.333039
StLNC0006	MSTRG.15118.2	0.332617
StLNC0006	PGSC0003DMT400083157	0.332591
StLNC0006	PGSC0003DMT400045754	0.332497
StLNC0006	MSTRG.17130.3	0.331915
StLNC0006	MSTRG.80.11	0.331552
StLNC0006	MSTRG.12189.1	0.331493
StLNC0006	MSTRG.10029.11	0.331211
StLNC0006	PGSC0003DMT400047328	0.331194
StLNC0006	PGSC0003DMT400058309	0.331162
StLNC0006	MSTRG.1385.1	0.330923
StLNC0006	MSTRG.27182.2	0.330818
StLNC0006	MSTRG.16568.3	0.330354
StLNC0006	MSTRG.10651.1	0.330128
StLNC0006	MSTRG.28881.1	0.329625
StLNC0006	PGSC0003DMT400073455	0.329092
StLNC0006	MSTRG.15732.3	0.328332
StLNC0006	PGSC0003DMT400048049	0.328319
StLNC0006	PGSC0003DMT400072788	0.328194
StLNC0006	MSTRG.19375.1	0.327798
StLNC0006	PGSC0003DMT400070606	0.32776
StLNC0006	MSTRG.5416.2	0.327699
StLNC0006	MSTRG.4285.2	0.327535
StLNC0006	PGSC0003DMT400040149	0.327313
StLNC0006	MSTRG.21626.6	0.327122
StLNC0006	MSTRG.17533.1	0.326808
StLNC0006	PGSC0003DMT400075055	0.326728
StLNC0006	MSTRG.17174.3	0.326574
StLNC0006	MSTRG.16259.3	0.326266
StLNC0006	MSTRG.27281.2	0.326252
StLNC0006	PGSC0003DMT400011347	0.325987
StLNC0006	PGSC0003DMT400014974	0.325823
StLNC0006	PGSC0003DMT400010406	0.325751
StLNC0006	MSTRG.13370.3	0.325649
StLNC0006	MSTRG.90.2	0.325384
StLNC0006	MSTRG.8103.2	0.325027
StLNC0006	MSTRG.8132.5	0.324996
StLNC0006	MSTRG.8099.2	0.32493
StLNC0006	MSTRG.18381.2	0.324882
StLNC0006	MSTRG.26263.1	0.324824
StLNC0006	PGSC0003DMT400025529	0.324506
StLNC0006	PGSC0003DMT400061556	0.323948
StLNC0006	MSTRG.5842.3	0.323735
StLNC0006	MSTRG.10149.2	0.323449
StLNC0006	PGSC0003DMT400073765	0.32316
StLNC0006	PGSC0003DMT400039173	0.322958
StLNC0006	MSTRG.8016.3	0.322898
StLNC0006	MSTRG.15770.3	0.322843
StLNC0006	PGSC0003DMT400028718	0.322456
StLNC0006	PGSC0003DMT400032147	0.32241
StLNC0006	MSTRG.3320.9	0.322345
StLNC0006	MSTRG.3483.8	0.322222
StLNC0006	MSTRG.509.2	0.322139
StLNC0006	MSTRG.5602.2	0.321958
StLNC0006	MSTRG.28814.2	0.321944
StLNC0006	MSTRG.351.12	0.321804
StLNC0006	MSTRG.13294.2	0.321684
StLNC0006	MSTRG.27642.1	0.321635
StLNC0006	PGSC0003DMT400003328	0.321334
StLNC0006	PGSC0003DMT400008635	0.32129
StLNC0006	MSTRG.2907.1	0.321268
StLNC0006	PGSC0003DMT400046612	0.321187
StLNC0006	MSTRG.13658.1	0.32098
StLNC0006	MSTRG.15844.3	0.320932
StLNC0006	PGSC0003DMT400037118	0.320902
StLNC0006	PGSC0003DMT400081378	0.320433
StLNC0006	PGSC0003DMT400053566	0.320363
StLNC0006	PGSC0003DMT400005949	0.320218
StLNC0006	MSTRG.23084.15	0.320059
StLNC0006	PGSC0003DMT400017259	0.319998
StLNC0006	MSTRG.25868.1	0.319899
StLNC0006	PGSC0003DMT400046516	0.319872
StLNC0006	MSTRG.11149.1	0.319694
StLNC0006	MSTRG.26817.1	0.319494
StLNC0006	MSTRG.21451.5	0.319493
StLNC0006	PGSC0003DMT400015596	0.319235
StLNC0006	MSTRG.3099.6	0.319118
StLNC0006	PGSC0003DMT400067044	0.319016
StLNC0006	MSTRG.26099.1	0.318911
StLNC0006	MSTRG.11614.3	0.318309
StLNC0006	PGSC0003DMT400065792	0.318234
StLNC0006	PGSC0003DMT400008345	0.318159
StLNC0006	PGSC0003DMT400026260	0.318132
StLNC0006	PGSC0003DMT400014303	0.318028
StLNC0006	PGSC0003DMT400047532	0.31797
StLNC0006	PGSC0003DMT400067845	0.317906
StLNC0006	MSTRG.12830.6	0.317881
StLNC0006	PGSC0003DMT400078364	0.317822
StLNC0006	PGSC0003DMT400022877	0.317761
StLNC0006	MSTRG.26306.1	0.317473
StLNC0006	MSTRG.25407.9	0.317348
StLNC0006	PGSC0003DMT400037121	0.317308
StLNC0006	PGSC0003DMT400042652	0.317196
StLNC0006	MSTRG.5728.3	0.316993
StLNC0006	MSTRG.28509.1	0.316888
StLNC0006	MSTRG.7417.20	0.316743
StLNC0006	MSTRG.25627.1	0.316257
StLNC0006	MSTRG.24231.8	0.315952
StLNC0006	MSTRG.6008.2	0.315914
StLNC0006	PGSC0003DMT400007416	0.315865
StLNC0006	PGSC0003DMT400037122	0.31581
StLNC0006	PGSC0003DMT400041444	0.315799
StLNC0006	MSTRG.11.3	0.315785
StLNC0006	MSTRG.23403.1	0.31578
StLNC0006	MSTRG.15782.3	0.315658
StLNC0006	PGSC0003DMT400077578	0.315565
StLNC0006	MSTRG.27469.1	0.315501
StLNC0006	PGSC0003DMT400047238	0.315488
StLNC0006	MSTRG.22854.4	0.315463
StLNC0006	MSTRG.18349.1	0.315348
StLNC0006	PGSC0003DMT400020353	0.315307
StLNC0006	PGSC0003DMT400076547	0.315187
StLNC0006	MSTRG.15834.2	0.315143
StLNC0006	MSTRG.18963.8	0.315092
StLNC0006	MSTRG.15287.10	0.315015
StLNC0006	PGSC0003DMT400063510	0.314961
StLNC0006	MSTRG.29020.2	0.314495
StLNC0006	PGSC0003DMT400015974	0.314417
StLNC0006	MSTRG.23413.3	0.314312
StLNC0006	PGSC0003DMT400021274	0.314228
StLNC0006	MSTRG.21734.1	0.314149
StLNC0006	PGSC0003DMT400049897	0.314107
StLNC0006	PGSC0003DMT400003630	0.313938
StLNC0006	MSTRG.19004.10	0.313918
StLNC0006	PGSC0003DMT400042426	0.313862
StLNC0006	PGSC0003DMT400067318	0.313622
StLNC0006	MSTRG.22671.1	0.313488
StLNC0006	PGSC0003DMT400038586	0.313469
StLNC0006	PGSC0003DMT400017920	0.313453
StLNC0006	MSTRG.17019.1	0.313345
StLNC0006	PGSC0003DMT400040569	0.313279
StLNC0006	MSTRG.27122.1	0.313224
StLNC0006	MSTRG.28150.2	0.31321
StLNC0006	MSTRG.18059.21	0.313198
StLNC0006	MSTRG.21810.2	0.312946
StLNC0006	MSTRG.9748.4	0.312807
StLNC0006	PGSC0003DMT400058913	0.312792
StLNC0006	MSTRG.9209.3	0.312755
StLNC0006	PGSC0003DMT400037162	0.312731
StLNC0006	PGSC0003DMT400050546	0.312725
StLNC0006	MSTRG.18210.3	0.312712
StLNC0006	MSTRG.9766.2	0.312517
StLNC0006	PGSC0003DMT400092557	0.312457
StLNC0006	MSTRG.6780.1	0.312435
StLNC0006	MSTRG.7510.3	0.312238
StLNC0006	PGSC0003DMT400018343	0.311908
StLNC0006	MSTRG.5077.1	0.311879
StLNC0006	PGSC0003DMT400002312	0.311657
StLNC0006	MSTRG.14204.3	0.311516
StLNC0006	PGSC0003DMT400055610	0.311404
StLNC0006	PGSC0003DMT400083788	0.311338
StLNC0006	MSTRG.14713.1	0.311282
StLNC0006	MSTRG.9423.2	0.311224
StLNC0006	MSTRG.21276.3	0.311204
StLNC0006	MSTRG.28712.1	0.31106
StLNC0006	PGSC0003DMT400026861	0.311047
StLNC0006	MSTRG.13932.1	0.310927
StLNC0006	MSTRG.8491.1	0.310896
StLNC0006	PGSC0003DMT400070825	0.310889
StLNC0006	PGSC0003DMT400032029	0.310859
StLNC0006	PGSC0003DMT400068505	0.31084
StLNC0006	PGSC0003DMT400017579	0.310704
StLNC0006	MSTRG.23301.3	0.310663
StLNC0006	MSTRG.8033.2	0.310659
StLNC0006	MSTRG.27122.5	0.310647
StLNC0006	MSTRG.24373.2	0.3106
StLNC0006	MSTRG.27122.11	0.310579
StLNC0006	PGSC0003DMT400073794	0.310578
StLNC0006	MSTRG.26056.1	0.310563
StLNC0006	PGSC0003DMT400058471	0.310547
StLNC0006	PGSC0003DMT400022377	0.310543
StLNC0006	MSTRG.6826.2	0.310486
StLNC0006	MSTRG.12323.2	0.310425
StLNC0006	PGSC0003DMT400076456	0.310386
StLNC0006	MSTRG.23961.4	0.310185
StLNC0006	MSTRG.7125.8	0.310182
StLNC0006	PGSC0003DMT400026412	0.310098
StLNC0006	PGSC0003DMT400003562	0.310092
StLNC0006	PGSC0003DMT400042188	0.309625
StLNC0006	MSTRG.15986.2	0.309584
StLNC0006	PGSC0003DMT400019739	0.309578
StLNC0006	PGSC0003DMT400004999	0.309549
StLNC0006	MSTRG.6835.2	0.309503
StLNC0006	MSTRG.7000.1	0.309468
StLNC0006	MSTRG.11315.3	0.309368
StLNC0006	MSTRG.24360.1	0.309343
StLNC0006	PGSC0003DMT400036146	0.309323
StLNC0006	MSTRG.24197.1	0.309274
StLNC0006	PGSC0003DMT400023518	0.309187
StLNC0006	MSTRG.9171.2	0.309078
StLNC0006	PGSC0003DMT400032134	0.30902
StLNC0006	PGSC0003DMT400057529	0.308974
StLNC0006	MSTRG.1263.4	0.30897
StLNC0006	PGSC0003DMT400008346	0.308898
StLNC0006	PGSC0003DMT400058292	0.308761
StLNC0006	PGSC0003DMT400031768	0.308672
StLNC0006	MSTRG.23996.1	0.308551
StLNC0006	PGSC0003DMT400028220	0.308545
StLNC0006	MSTRG.15799.3	0.308543
StLNC0006	MSTRG.19253.2	0.308488
StLNC0006	PGSC0003DMT400003749	0.308411
StLNC0006	MSTRG.23326.1	0.308396
StLNC0006	MSTRG.809.1	0.308333
StLNC0006	PGSC0003DMT400062698	0.308105
StLNC0006	MSTRG.2725.7	0.308025
StLNC0006	MSTRG.17220.2	0.307976
StLNC0006	MSTRG.3449.4	0.307788
StLNC0006	PGSC0003DMT400037120	0.307779
StLNC0006	MSTRG.19004.29	0.307662
StLNC0006	PGSC0003DMT400047866	0.30764
StLNC0006	PGSC0003DMT400049445	0.307597
StLNC0006	MSTRG.3870.1	0.307544
StLNC0006	PGSC0003DMT400057346	0.307517
StLNC0006	MSTRG.412.4	0.307489
StLNC0006	PGSC0003DMT400011336	0.307486
StLNC0006	MSTRG.8760.2	0.307439
StLNC0006	MSTRG.16843.2	0.307384
StLNC0006	MSTRG.17258.6	0.307311
StLNC0006	MSTRG.1177.1	0.307306
StLNC0006	MSTRG.15144.2	0.307225
StLNC0006	PGSC0003DMT400049845	0.30722
StLNC0006	PGSC0003DMT400054719	0.307095
StLNC0006	PGSC0003DMT400062384	0.307093
StLNC0006	PGSC0003DMT400006221	0.307067
StLNC0006	MSTRG.8738.1	0.307025
StLNC0006	MSTRG.23091.1	0.307016
StLNC0006	MSTRG.21533.2	0.307011
StLNC0006	PGSC0003DMT400036700	0.306964
StLNC0006	PGSC0003DMT400027652	0.306918
StLNC0006	MSTRG.28624.1	0.306846
StLNC0006	PGSC0003DMT400025563	0.306769
StLNC0006	MSTRG.22303.3	0.306717
StLNC0006	PGSC0003DMT400017538	0.306714
StLNC0006	PGSC0003DMT400018553	0.3067
StLNC0006	PGSC0003DMT400067485	0.306633
StLNC0006	MSTRG.19148.6	0.306616
StLNC0006	MSTRG.3804.3	0.306505
StLNC0006	PGSC0003DMT400072565	0.306503
StLNC0006	MSTRG.1335.2	0.306485
StLNC0006	MSTRG.28851.2	0.306345
StLNC0006	PGSC0003DMT400048079	0.306278
StLNC0006	MSTRG.9266.1	0.306255
StLNC0006	PGSC0003DMT400069710	0.306109
StLNC0006	PGSC0003DMT400036765	0.305943
StLNC0006	PGSC0003DMT400069195	0.305941
StLNC0006	MSTRG.2563.5	0.305923
StLNC0006	PGSC0003DMT400003000	0.305914
StLNC0006	MSTRG.27146.25	0.30589
StLNC0006	MSTRG.20836.1	0.305881
StLNC0006	PGSC0003DMT400040206	0.305871
StLNC0006	MSTRG.10509.3	0.305837
StLNC0006	PGSC0003DMT400064705	0.305832
StLNC0006	MSTRG.26669.1	0.305809
StLNC0006	MSTRG.7677.1	0.305804
StLNC0006	MSTRG.4915.5	0.305788
StLNC0006	PGSC0003DMT400068037	0.305731
StLNC0006	PGSC0003DMT400089529	0.305722
StLNC0006	PGSC0003DMT400054127	0.305655
StLNC0006	MSTRG.8612.1	0.305631
StLNC0006	PGSC0003DMT400002773	0.305615
StLNC0006	PGSC0003DMT400062153	0.305416
StLNC0006	MSTRG.3811.1	0.305396
StLNC0006	PGSC0003DMT400008044	0.305313
StLNC0006	PGSC0003DMT400012598	0.305201
StLNC0006	PGSC0003DMT400040399	0.305177
StLNC0006	MSTRG.15294.1	0.305097
StLNC0006	MSTRG.12588.2	0.305086
StLNC0006	PGSC0003DMT400018516	0.304985
StLNC0006	PGSC0003DMT400025334	0.304961
StLNC0006	MSTRG.444.1	0.304946
StLNC0006	PGSC0003DMT400073580	0.304942
StLNC0006	MSTRG.24065.2	0.304937
StLNC0006	MSTRG.3708.1	0.304888
StLNC0006	PGSC0003DMT400016087	0.304802
StLNC0006	PGSC0003DMT400048290	0.30476
StLNC0006	MSTRG.23118.1	0.304759
StLNC0006	PGSC0003DMT400023148	0.304755
StLNC0006	MSTRG.2456.3	0.304738
StLNC0006	PGSC0003DMT400014830	0.304726
StLNC0006	MSTRG.13184.5	0.304715
StLNC0006	MSTRG.12592.1	0.304708
StLNC0006	MSTRG.24038.3	0.304607
StLNC0006	MSTRG.25622.2	0.304545
StLNC0006	MSTRG.13473.4	0.304535
StLNC0006	PGSC0003DMT400028007	0.304503
StLNC0006	MSTRG.23026.3	0.304365
StLNC0006	MSTRG.10760.1	0.304336
StLNC0006	MSTRG.11727.6	0.304316
StLNC0006	MSTRG.27852.1	0.304292
StLNC0006	MSTRG.13195.1	0.304263
StLNC0006	MSTRG.3119.2	0.30423
StLNC0006	MSTRG.14059.4	0.304142
StLNC0006	MSTRG.3722.1	0.304026
StLNC0006	PGSC0003DMT400055259	0.3039
StLNC0006	MSTRG.18881.1	0.303876
StLNC0006	PGSC0003DMT400017419	0.303789
StLNC0006	MSTRG.20529.6	0.303754
StLNC0006	PGSC0003DMT400069232	0.303666
StLNC0006	PGSC0003DMT400083113	0.30363
StLNC0006	MSTRG.2889.4	0.303541
StLNC0006	PGSC0003DMT400054077	0.303515
StLNC0006	MSTRG.24270.1	0.30344
StLNC0006	MSTRG.19668.2	0.303421
StLNC0006	PGSC0003DMT400026053	0.303411
StLNC0006	PGSC0003DMT400021798	0.303388
StLNC0006	MSTRG.22870.1	0.303348
StLNC0006	MSTRG.27843.3	0.303273
StLNC0006	MSTRG.7174.1	0.303126
StLNC0006	PGSC0003DMT400054368	0.30311
StLNC0006	PGSC0003DMT400042668	0.30311
StLNC0006	PGSC0003DMT400033300	0.303064
StLNC0006	MSTRG.11491.1	0.303014
StLNC0006	PGSC0003DMT400011031	0.303
StLNC0006	PGSC0003DMT400011772	0.302963
StLNC0006	MSTRG.18218.2	0.30288
StLNC0006	MSTRG.3725.1	0.30288
StLNC0006	MSTRG.4042.1	0.302863
StLNC0006	PGSC0003DMT400047536	0.30278
StLNC0006	MSTRG.2256.1	0.302775
StLNC0006	PGSC0003DMT400067072	0.302764
StLNC0006	PGSC0003DMT400040143	0.302745
StLNC0006	MSTRG.8854.3	0.302667
StLNC0006	MSTRG.11202.1	0.302663
StLNC0006	PGSC0003DMT400037303	0.302596
StLNC0006	PGSC0003DMT400083853	0.30254
StLNC0006	MSTRG.19243.13	0.302535
StLNC0006	MSTRG.5066.2	0.302455
StLNC0006	MSTRG.9149.1	0.30243
StLNC0006	PGSC0003DMT400035731	0.302414
StLNC0006	MSTRG.11751.1	0.302397
StLNC0006	PGSC0003DMT400000764	0.302345
StLNC0006	PGSC0003DMT400015755	0.302333
StLNC0006	PGSC0003DMT400057329	0.302315
StLNC0006	PGSC0003DMT400033871	0.302309
StLNC0006	MSTRG.17372.1	0.302276
StLNC0006	PGSC0003DMT400017341	0.302245
StLNC0006	PGSC0003DMT400028721	0.302196
StLNC0006	MSTRG.8430.11	0.302183
StLNC0006	MSTRG.21940.2	0.302137
StLNC0006	PGSC0003DMT400084960	0.302136
StLNC0006	PGSC0003DMT400054623	0.302125
StLNC0006	PGSC0003DMT400019602	0.302105
StLNC0006	PGSC0003DMT400089487	0.302071
StLNC0006	MSTRG.18058.8	0.301977
StLNC0006	PGSC0003DMT400049940	0.301888
StLNC0006	PGSC0003DMT400096032	0.301874
StLNC0006	MSTRG.7955.1	0.301735
StLNC0006	MSTRG.26896.1	0.301724
StLNC0006	PGSC0003DMT400078350	0.301694
StLNC0006	MSTRG.14771.5	0.30165
StLNC0006	MSTRG.20194.2	0.301595
StLNC0006	PGSC0003DMT400075913	0.301539
StLNC0006	PGSC0003DMT400020315	0.301496
StLNC0006	PGSC0003DMT400007519	0.30147
StLNC0006	MSTRG.19347.9	0.301423
StLNC0006	PGSC0003DMT400042164	0.301387
StLNC0006	MSTRG.12219.1	0.301365
StLNC0006	MSTRG.27122.3	0.301306
StLNC0006	PGSC0003DMT400052937	0.301271
StLNC0006	PGSC0003DMT400022649	0.301189
StLNC0006	MSTRG.8609.2	0.301186
StLNC0006	MSTRG.27122.4	0.301177
StLNC0006	MSTRG.21969.4	0.301047
StLNC0006	MSTRG.27815.2	0.301033
StLNC0006	PGSC0003DMT400085026	0.300981
StLNC0006	PGSC0003DMT400030414	0.300913
StLNC0006	MSTRG.6201.2	0.300824
StLNC0006	PGSC0003DMT400070773	0.300813
StLNC0006	MSTRG.27680.7	0.30079
StLNC0006	PGSC0003DMT400067283	0.300724
StLNC0006	PGSC0003DMT400035459	0.300719
StLNC0006	MSTRG.10792.2	0.300715
StLNC0006	MSTRG.24134.1	0.300677
StLNC0006	PGSC0003DMT400025724	0.300653
StLNC0006	PGSC0003DMT400043275	0.300546
StLNC0006	PGSC0003DMT400049200	0.300542
StLNC0006	PGSC0003DMT400076932	0.300522
StLNC0006	PGSC0003DMT400012545	0.300516
StLNC0006	MSTRG.4819.3	0.300487
StLNC0006	PGSC0003DMT400079839	0.300485
StLNC0006	PGSC0003DMT400078144	0.300441
StLNC0006	MSTRG.23988.3	0.30044
StLNC0006	PGSC0003DMT400064102	0.300409
StLNC0006	PGSC0003DMT400007876	0.300391
StLNC0006	MSTRG.19941.1	0.300357
StLNC0006	MSTRG.28114.1	0.300352
StLNC0006	PGSC0003DMT400022781	0.300313
StLNC0006	MSTRG.6015.3	0.300275
StLNC0006	MSTRG.19592.3	0.300266
StLNC0006	PGSC0003DMT400080319	0.300241
StLNC0006	MSTRG.18666.1	0.300227
StLNC0006	MSTRG.1788.1	0.300215
StLNC0006	MSTRG.27248.3	0.300173
StLNC0006	MSTRG.1643.3	0.300173
StLNC0006	PGSC0003DMT400032855	0.30017
StLNC0006	MSTRG.4734.3	0.300131
StLNC0007	MSTRG.6539.1	0.353306
StLNC0007	MSTRG.7158.6	0.337547
StLNC0007	MSTRG.16611.1	0.335554
StLNC0007	MSTRG.23427.1	0.332403
StLNC0007	PGSC0003DMT400029631	0.330829
StLNC0007	MSTRG.22081.2	0.330269
StLNC0007	MSTRG.4261.7	0.330028
StLNC0007	MSTRG.18138.5	0.329672
StLNC0007	MSTRG.1410.2	0.327964
StLNC0007	MSTRG.25936.4	0.327773
StLNC0007	MSTRG.15794.3	0.324028
StLNC0007	MSTRG.26874.1	0.323157
StLNC0007	PGSC0003DMT400048139	0.3228
StLNC0007	MSTRG.22124.6	0.318429
StLNC0007	MSTRG.1848.1	0.310541
StLNC0007	MSTRG.2353.2	0.309715
StLNC0007	PGSC0003DMT400066321	0.303155
StLNC0007	PGSC0003DMT400042496	0.302359
StLNC0007	PGSC0003DMT400023277	0.301482
StLNC0007	MSTRG.27101.1	0.300661
StLNC0007	MSTRG.2955.1	0.300424
StLNC0007	MSTRG.5444.2	0.300303
StLNC0008	MSTRG.25430.3	0.37435
StLNC0008	PGSC0003DMT400033382	0.356175
StLNC0008	PGSC0003DMT400086213	0.34783
StLNC0008	MSTRG.17258.15	0.344624
StLNC0008	MSTRG.27944.7	0.342169
StLNC0008	MSTRG.1366.5	0.341269
StLNC0008	MSTRG.23476.1	0.33728
StLNC0008	PGSC0003DMT400045448	0.33654
StLNC0008	PGSC0003DMT400077349	0.335803
StLNC0008	PGSC0003DMT400011655	0.333545
StLNC0008	MSTRG.27043.2	0.330066
StLNC0008	MSTRG.627.1	0.329765
StLNC0008	PGSC0003DMT400053236	0.329321
StLNC0008	MSTRG.14287.1	0.328638
StLNC0008	MSTRG.12734.2	0.328537
StLNC0008	MSTRG.4797.9	0.326284
StLNC0008	MSTRG.24579.4	0.324711
StLNC0008	MSTRG.3841.1	0.324201
StLNC0008	PGSC0003DMT400005013	0.323988
StLNC0008	MSTRG.23883.1	0.323796
StLNC0008	MSTRG.7545.1	0.322568
StLNC0008	MSTRG.19123.6	0.322028
StLNC0008	MSTRG.23140.4	0.321457
StLNC0008	PGSC0003DMT400081851	0.321133
StLNC0008	PGSC0003DMT400005951	0.320048
StLNC0008	MSTRG.12191.3	0.318859
StLNC0008	MSTRG.29439.2	0.318846
StLNC0008	MSTRG.7274.3	0.317521
StLNC0008	MSTRG.19679.1	0.317332
StLNC0008	PGSC0003DMT400038023	0.316901
StLNC0008	MSTRG.28318.2	0.315933
StLNC0008	MSTRG.16170.2	0.315697
StLNC0008	MSTRG.17851.2	0.31559
StLNC0008	MSTRG.7524.1	0.313949
StLNC0008	MSTRG.27786.3	0.313109
StLNC0008	PGSC0003DMT400007237	0.312289
StLNC0008	MSTRG.25430.2	0.311645
StLNC0008	MSTRG.10586.1	0.311472
StLNC0008	MSTRG.4763.2	0.310933
StLNC0008	MSTRG.19890.1	0.310373
StLNC0008	PGSC0003DMT400065917	0.309139
StLNC0008	PGSC0003DMT400008250	0.308538
StLNC0008	MSTRG.17307.3	0.308316
StLNC0008	MSTRG.971.2	0.308192
StLNC0008	MSTRG.25492.25	0.308038
StLNC0008	MSTRG.1213.4	0.307609
StLNC0008	MSTRG.15519.2	0.307182
StLNC0008	PGSC0003DMT400014455	0.306274
StLNC0008	MSTRG.18842.1	0.305153
StLNC0008	PGSC0003DMT400021210	0.304344
StLNC0008	PGSC0003DMT400059698	0.30412
StLNC0008	MSTRG.8117.1	0.303622
StLNC0008	MSTRG.11861.1	0.303479
StLNC0008	PGSC0003DMT400012954	0.303193
StLNC0008	MSTRG.5727.7	0.302854
StLNC0008	MSTRG.4032.2	0.302634
StLNC0008	MSTRG.18963.12	0.302563
StLNC0008	MSTRG.25229.1	0.302356
StLNC0008	PGSC0003DMT400052227	0.302348
StLNC0008	PGSC0003DMT400016072	0.301496
StLNC0008	PGSC0003DMT400020459	0.301282
StLNC0008	MSTRG.18963.3	0.300545
[truncated: 993 more rows]
