# Supplementary material for: Genome-Wide Identification and Characterization of Potato Long Non-coding RNAs Associated With Phytophthora infestans Resistance
Source: Front Plant Sci. 2021 Feb 10;12:619062. doi: 10.3389/fpls.2021.619062 (PMC7902931; doi:10.3389/fpls.2021.619062)
Supplement: Supplementary Table 14 — The primers of this work are listed. [file Table_14.XLSX]

## Sheet: Sheet1
LncRNA	Name	Forward primer	Reversed primer	Length	Nucleic acid similarity
MSTRG.10009.1	StLNC0001	GTTCGAACAGCAGGCTACTA	AGTACTTGGGATCAGCCACT	166bp	0.992
MSTRG.11029.1	StLNC0002	TGAGCCTCCTGAGTACCACA	ACATAGGTTCGTTGACGGGG	149bp	0.984
MSTRG.11107.4	StLNC0003	ACCACAGTGAGGACTCAACAA	AGCCTTCCATTCAGTTCGACA	164bp	0.995
MSTRG.11254.9	StLNC0004	GGAGGGGGAGAGGAGTAAACAT	TCTCCTCCACCACACCATCATC	135bp	0.981
MSTRG.12147.8	StLNC0005	ATTGCGTGCAGTTGATGTGG	GGCATGGGATGCAATGTCTG	164bp	0.997
MSTRG.12209.3	StLNC0006	CTAGCTCGACCTGCCTTCAC	TGTTGGTTCCGTTTGGTTGG	161bp	0.996
MSTRG.14784.2	StLNC0007	GATCTTGAGCTTTTGCGGGT	CAATGAGGACCGCCTTGAGA	176bp	0.992
MSTRG.14786.2	StLNC0008	CGTCAAGGGCCACTCTCTTC	AAATTGGAGTCTGGGCGGAG	161bp	0.991
MSTRG.1790.3	StLNC0009	TTCAAATGGGAGGGCTGCAT	CGTGCACGAGCAAATGAGTG	159bp	0.993
MSTRG.3821.1	StLNC0010	CCAGAACTCTGACCATCCCAC	CACGGCCGGAATATTTGGTT	172bp	0.981
MSTRG.3920.1	StLNC0011	GTGGCGCATGATAATGATCGG	AACCTTCGGGAGCCACATCT	133bp	0.986
Nbv5.1tr6234951	NbEXT	TGGCTTCTCTATTTGCCACTCT	TGGTGGGGTGGTGATGGATA	163bp
EF1α	EF1α	ATTGGAAACGGATATGCTCCA	TCCTTACCTGAACGCCTGTCA	101bp
Nbv5.1tr6234951	NbEXT-full	TCTCATTTGTTTCTAAGATG	AGGTGACTTGTAAACAGGAG	1125BP
